# Supplementary material for: Lockdown Litter: A critical analysis of global COVID-19 PPE litter and measures for mitigation
Source: Research Square preprint supplement (doi:10.21203/rs.3.rs-134183/v1), 2021-03-31
Supplement: Supplementary file 1 [file 26946b22eed73d010430ce94.csv]

Litter	Tags	Location (Lat/Long)	Country	Date				Tags
9152216	paper	51.0614287/5.180257	BE	Mon Oct 12 2020	Oct	2020	Oct-2020	paper
9146834	plastic	51.0614286/5.1802537	BE	Mon Oct 12 2020	Oct	2020	Oct-2020	plastic
9146538	wrapper	51.061429/5.1802553	BE	Mon Oct 12 2020	Oct	2020	Oct-2020	wrapper
9120973	plastic, bag	50.8185818/4.7243234	BE	Sat Oct 10 2020	Oct	2020	Oct-2020	plastic	bag
9120972	plastic	50.8182765/4.7259141	BE	Sat Oct 10 2020	Oct	2020	Oct-2020	plastic
9120971	cup, mcdonalds	50.8187406/4.7249948	BE	Sat Oct 10 2020	Oct	2020	Oct-2020	cup	mcdonalds
9120970	plastic	50.8185177/4.7251782	BE	Sat Oct 10 2020	Oct	2020	Oct-2020	plastic
9120969	bottle, plastic, water	50.8187838/4.7250193	BE	Sat Oct 10 2020	Oct	2020	Oct-2020	bottle	plastic	water
9120968	cigarettepack	50.8188862/4.7230819	BE	Sat Oct 10 2020	Oct	2020	Oct-2020	cigarettepack
9120967	cigarettepack	50.818615/4.7243579	BE	Sat Oct 10 2020	Oct	2020	Oct-2020	cigarettepack
9120966	plastic	50.8185694/4.7251791	BE	Sat Oct 10 2020	Oct	2020	Oct-2020	plastic
9120965	plastic	50.8186482/4.7249895	BE	Sat Oct 10 2020	Oct	2020	Oct-2020	plastic
9108406	plastic, wrapper	50.4968458/3.6577388	BE	Sat Oct 10 2020	Oct	2020	Oct-2020	plastic	wrapper
9108405	plastic, foodwrapper, wrapper	50.4968468/3.6577386	BE	Sat Oct 10 2020	Oct	2020	Oct-2020	plastic	foodwrapper	wrapper
9061669	mijn, lolly, is, gevallen	51.1847154/4.3895069	BE	Thu Oct 08 2020	Oct	2020	Oct-2020	mijn	lolly	is	gevallen
9046598	cigarette, butt	50.8827584/4.467097	BE	Wed Oct 07 2020	Oct	2020	Oct-2020	cigarette	butt
9006222	cigarette	51.2339867/2.9717464	BE	Mon Oct 05 2020	Oct	2020	Oct-2020	cigarette
9006048	wrapper, aluminium	50.4968027/3.6578004	BE	Mon Oct 05 2020	Oct	2020	Oct-2020	wrapper	aluminium
9006047	plastic	50.4967535/3.6577042	BE	Mon Oct 05 2020	Oct	2020	Oct-2020	plastic
9006046	cigarette	50.4967539/3.6577063	BE	Mon Oct 05 2020	Oct	2020	Oct-2020	cigarette
9006045	cigarette	50.4967956/3.6578263	BE	Mon Oct 05 2020	Oct	2020	Oct-2020	cigarette
9006044	glass	50.4967551/3.6577412	BE	Mon Oct 05 2020	Oct	2020	Oct-2020	glass
9006043	cigarette, butt	50.4967489/3.657697	BE	Mon Oct 05 2020	Oct	2020	Oct-2020	cigarette	butt
9006042	cigarette, butt	50.496747/3.6576232	BE	Mon Oct 05 2020	Oct	2020	Oct-2020	cigarette	butt
9006041	wrapper, plastic, tic tac	50.4968138/3.6577696	BE	Mon Oct 05 2020	Oct	2020	Oct-2020	wrapper	plastic	tic tac
9006040	cigarette	50.4967867/3.6577208	BE	Mon Oct 05 2020	Oct	2020	Oct-2020	cigarette
9006039	glass	50.4967978/3.6576817	BE	Mon Oct 05 2020	Oct	2020	Oct-2020	glass
9006038	cigarette, butt	50.4967314/3.657691	BE	Mon Oct 05 2020	Oct	2020	Oct-2020	cigarette	butt
9006037	cigarette, butt	50.4967496/3.6576314	BE	Mon Oct 05 2020	Oct	2020	Oct-2020	cigarette	butt
9006036	cigarette, butt	50.4967323/3.6576689	BE	Mon Oct 05 2020	Oct	2020	Oct-2020	cigarette	butt
9006035	cigarette, butt	50.496738/3.6576691	BE	Mon Oct 05 2020	Oct	2020	Oct-2020	cigarette	butt
9006017	cigarettebutt	50.9947545147432/3.74483835541219	BE	Mon Oct 05 2020	Oct	2020	Oct-2020	cigarettebutt
9006016	cigarettebutt	50.9947975306167/3.74490606452068	BE	Mon Oct 05 2020	Oct	2020	Oct-2020	cigarettebutt
9006015	cigarettebutt	50.9948185899866/3.74491530524593	BE	Mon Oct 05 2020	Oct	2020	Oct-2020	cigarettebutt
9005988	cigarettebutt	50.9947317945951/3.74487648302875	BE	Mon Oct 05 2020	Oct	2020	Oct-2020	cigarettebutt
9005987	cigarettebutt	50.9947690343816/3.74479748051902	BE	Mon Oct 05 2020	Oct	2020	Oct-2020	cigarettebutt
9005985	cigarettebutt	50.9946544210902/3.7452311887832	BE	Mon Oct 05 2020	Oct	2020	Oct-2020	cigarettebutt
8925092	cigarettebutt	50.7128260272434/3.83180311248362	BE	Sat Oct 03 2020	Oct	2020	Oct-2020	cigarettebutt
8922698	cigarette	51.0840626653756/3.77367188975872	BE	Sun Oct 04 2020	Oct	2020	Oct-2020	cigarette
8922697	cigarettepack	51.0842714745941/3.77350695149046	BE	Sun Oct 04 2020	Oct	2020	Oct-2020	cigarettepack
8922696	plastic	51.0841479349342/3.7737223958569	BE	Sun Oct 04 2020	Oct	2020	Oct-2020	plastic
8922695	paper	51.0842213488598/3.77383835096513	BE	Sun Oct 04 2020	Oct	2020	Oct-2020	paper
8922694	piece	51.0843051613043/3.77365472179486	BE	Sun Oct 04 2020	Oct	2020	Oct-2020	piece
8922693	cigarette	51.084100860508/3.77410947324782	BE	Sun Oct 04 2020	Oct	2020	Oct-2020	cigarette
8922692	plastic	51.0843815069734/3.77428932858426	BE	Sun Oct 04 2020	Oct	2020	Oct-2020	plastic
8922691	cigarette	51.0842008559096/3.77409706996788	BE	Sun Oct 04 2020	Oct	2020	Oct-2020	cigarette
8922690	plastic	51.0840352930872/3.7742641392141	BE	Sun Oct 04 2020	Oct	2020	Oct-2020	plastic
8922689	plastic	51.0840310705683/3.7745847528465	BE	Sun Oct 04 2020	Oct	2020	Oct-2020	plastic
8922688	cigarette	51.0840999138246/3.77399730021205	BE	Sun Oct 04 2020	Oct	2020	Oct-2020	cigarette
8922687	wrapper	51.0840315905875/3.77461663812102	BE	Sun Oct 04 2020	Oct	2020	Oct-2020	wrapper
8922686	cigarette	51.0840667777396/3.77469423121305	BE	Sun Oct 04 2020	Oct	2020	Oct-2020	cigarette
8922680	plastic, wrapper	51.0840310705683/3.7745847528465	BE	Sun Oct 04 2020	Oct	2020	Oct-2020	plastic	wrapper
8922677	cigarette	51.0843415567406/3.77417783402536	BE	Sun Oct 04 2020	Oct	2020	Oct-2020	cigarette
8922676	wrapper, plastic	51.0840273307458/3.77445365713215	BE	Sun Oct 04 2020	Oct	2020	Oct-2020	wrapper	plastic
8922675	plastic	51.0840202858009/3.77399135654022	BE	Sun Oct 04 2020	Oct	2020	Oct-2020	plastic
8922674	tissue	51.0843193490391/3.77412813033398	BE	Sun Oct 04 2020	Oct	2020	Oct-2020	tissue
8922673	plastic	51.0841242258649/3.77409186853878	BE	Sun Oct 04 2020	Oct	2020	Oct-2020	plastic
8922672	plastic	51.0841011954862/3.77410762563681	BE	Sun Oct 04 2020	Oct	2020	Oct-2020	plastic
8922671	piece	51.0842697849048/3.77408573574035	BE	Sun Oct 04 2020	Oct	2020	Oct-2020	piece
8922670	plastic, piece	51.0843121033217/3.77369317924584	BE	Sun Oct 04 2020	Oct	2020	Oct-2020	plastic	piece
8922669	cigarette	51.0842358969756/3.77410778697112	BE	Sun Oct 04 2020	Oct	2020	Oct-2020	cigarette
8922668	can	51.0844043494203/3.77379473662442	BE	Sun Oct 04 2020	Oct	2020	Oct-2020	can
8922667	plastic	51.0843844819705/3.77362840348382	BE	Sun Oct 04 2020	Oct	2020	Oct-2020	plastic
8922666	plastic, cup	51.0847634318004/3.77359578038511	BE	Sun Oct 04 2020	Oct	2020	Oct-2020	plastic	cup
8922665	aluminumfoil	51.084587076397/3.77334606973329	BE	Sun Oct 04 2020	Oct	2020	Oct-2020	aluminumfoil
8922664	aluminiumfoil	51.08468169985/3.77379529965846	BE	Sun Oct 04 2020	Oct	2020	Oct-2020	aluminiumfoil
8922663	straw	51.0846609655379/3.77382474821848	BE	Sun Oct 04 2020	Oct	2020	Oct-2020	straw
8922662	metalcap	51.0847015543455/3.7735849937515	BE	Sun Oct 04 2020	Oct	2020	Oct-2020	metalcap
8922661	plastic, wrapper	51.0848227587829/3.77358836378024	BE	Sun Oct 04 2020	Oct	2020	Oct-2020	plastic	wrapper
8922660	plastic	51.0848227587829/3.77358836378024	BE	Sun Oct 04 2020	Oct	2020	Oct-2020	plastic
8922659	plasticfork	51.0848585998548/3.77369278537049	BE	Sun Oct 04 2020	Oct	2020	Oct-2020	plasticfork
8922658	plastic, wrapper	51.0848585998548/3.77369278537049	BE	Sun Oct 04 2020	Oct	2020	Oct-2020	plastic	wrapper
8922657	wrapper, plastic	51.0849988646093/3.77365365720761	BE	Sun Oct 04 2020	Oct	2020	Oct-2020	wrapper	plastic
8922656	plastic, piece	51.0846332188248/3.77361870249053	BE	Sun Oct 04 2020	Oct	2020	Oct-2020	plastic	piece
8922655	plastic, wrapper	51.0847859421824/3.7736625250389	BE	Sun Oct 04 2020	Oct	2020	Oct-2020	plastic	wrapper
8922654	candy, wrapper	51.0848211734941/3.77367352195642	BE	Sun Oct 04 2020	Oct	2020	Oct-2020	candy	wrapper
8922653	plastic	51.0841196033217/3.77384990367825	BE	Sun Oct 04 2020	Oct	2020	Oct-2020	plastic
8922652	cigarette	51.0841024299419/3.77417218176504	BE	Sun Oct 04 2020	Oct	2020	Oct-2020	cigarette
8922651	cigarettebutt	51.0841044830563/3.77419144610441	BE	Sun Oct 04 2020	Oct	2020	Oct-2020	cigarettebutt
8922650	cigarette	51.0843466009377/3.77346707091456	BE	Sun Oct 04 2020	Oct	2020	Oct-2020	cigarette
8922648	cigarette	51.0841188122203/3.77415919731926	BE	Sun Oct 04 2020	Oct	2020	Oct-2020	cigarette
8922647	plastic	51.0841220058816/3.7741447840548	BE	Sun Oct 04 2020	Oct	2020	Oct-2020	plastic
8922646	plastic	51.0841214283964/3.77416535814071	BE	Sun Oct 04 2020	Oct	2020	Oct-2020	plastic
8922645	cigarette	51.0840517406013/3.77405274523979	BE	Sun Oct 04 2020	Oct	2020	Oct-2020	cigarette
8922644	cigarette	51.0840821414956/3.77408383457664	BE	Sun Oct 04 2020	Oct	2020	Oct-2020	cigarette
8922642	cigarette	51.0842217202513/3.77392069667965	BE	Sun Oct 04 2020	Oct	2020	Oct-2020	cigarette
8922641	cigarette	51.0840291704523/3.77385070386104	BE	Sun Oct 04 2020	Oct	2020	Oct-2020	cigarette
8921947	metal piece	51.0847477059195/3.77366805532749	BE	Sun Oct 04 2020	Oct	2020	Oct-2020	metal piece
8921946	plastic, wrapper	51.0848192644058/3.77366137983952	BE	Sun Oct 04 2020	Oct	2020	Oct-2020	plastic	wrapper
8921944	wrapper, plastic	51.0848306440243/3.77364519823719	BE	Sun Oct 04 2020	Oct	2020	Oct-2020	wrapper	plastic
8921941	plastic	51.0848415829269/3.77371238380426	BE	Sun Oct 04 2020	Oct	2020	Oct-2020	plastic
8921940	metal piece	51.0849254274612/3.77369476836379	BE	Sun Oct 04 2020	Oct	2020	Oct-2020	metal piece
8921939	glassbottle	51.0848509583429/3.77371586653403	BE	Sun Oct 04 2020	Oct	2020	Oct-2020	glassbottle
8921938	wrapper, plastic	51.0848415829269/3.77371238380426	BE	Sun Oct 04 2020	Oct	2020	Oct-2020	wrapper	plastic
8921936	wrapper, plastic	51.0848476748167/3.77369685417045	BE	Sun Oct 04 2020	Oct	2020	Oct-2020	wrapper	plastic
8921935	wrapper, plastic	51.084877588259/3.77359144568433	BE	Sun Oct 04 2020	Oct	2020	Oct-2020	wrapper	plastic
8921934	piece	51.0847461214834/3.77341130345085	BE	Sun Oct 04 2020	Oct	2020	Oct-2020	piece
8921933	plastic	51.0849932308916/3.77344832109806	BE	Sun Oct 04 2020	Oct	2020	Oct-2020	plastic
8921932	plastic, wrapper	51.084877588259/3.77359144568433	BE	Sun Oct 04 2020	Oct	2020	Oct-2020	plastic	wrapper
8921931	wrapper, plastic	51.0847897923095/3.77371329810829	BE	Sun Oct 04 2020	Oct	2020	Oct-2020	wrapper	plastic
8921930	plastic	51.084816554179/3.77374881494032	BE	Sun Oct 04 2020	Oct	2020	Oct-2020	plastic
8921929	aluminumfoil	51.0848268745739/3.7736510489336	BE	Sun Oct 04 2020	Oct	2020	Oct-2020	aluminumfoil
8921928	plastic	51.084816554179/3.77374881494032	BE	Sun Oct 04 2020	Oct	2020	Oct-2020	plastic
8921927	plastic, bag	51.0848231903663/3.77370130623002	BE	Sun Oct 04 2020	Oct	2020	Oct-2020	plastic	bag
8921926	plastic	51.0848164510683/3.77369187361093	BE	Sun Oct 04 2020	Oct	2020	Oct-2020	plastic
8921925	plastic, wrapper	51.0847549149811/3.77374283492737	BE	Sun Oct 04 2020	Oct	2020	Oct-2020	plastic	wrapper
8921924	plastic, wrapper	51.0848589326716/3.77370948035312	BE	Sun Oct 04 2020	Oct	2020	Oct-2020	plastic	wrapper
8921923	plastic, wrapper	51.0848563093659/3.77365213798259	BE	Sun Oct 04 2020	Oct	2020	Oct-2020	plastic	wrapper
8921922	plastic, wrapper	51.0847547853244/3.77375915350113	BE	Sun Oct 04 2020	Oct	2020	Oct-2020	plastic	wrapper
8921921	wrapper, plastic	51.0847549149811/3.77374283492737	BE	Sun Oct 04 2020	Oct	2020	Oct-2020	wrapper	plastic
8921919	cigarettepack	51.0847656265304/3.77369859728844	BE	Sun Oct 04 2020	Oct	2020	Oct-2020	cigarettepack
8921918	straw	51.0847490828965/3.77357344564781	BE	Sun Oct 04 2020	Oct	2020	Oct-2020	straw
8921917	can	51.0846376689691/3.77359780570634	BE	Sun Oct 04 2020	Oct	2020	Oct-2020	can
8921916	plastic, candy	51.0845255280401/3.77368208428842	BE	Sun Oct 04 2020	Oct	2020	Oct-2020	plastic	candy
8921915	metal	51.084604477816/3.77376615020946	BE	Sun Oct 04 2020	Oct	2020	Oct-2020	metal
8921914	plastic, wrapper	51.084753974646/3.77361874865707	BE	Sun Oct 04 2020	Oct	2020	Oct-2020	plastic	wrapper
8921912	paper	51.084604477816/3.77376615020946	BE	Sun Oct 04 2020	Oct	2020	Oct-2020	paper
8921911	aluminumfoil	51.0848116552168/3.77377388201282	BE	Sun Oct 04 2020	Oct	2020	Oct-2020	aluminumfoil
8921909	plastic, wrapper	51.0848489963879/3.7737090303518	BE	Sun Oct 04 2020	Oct	2020	Oct-2020	plastic	wrapper
8921908	facemask	51.0848489963879/3.7737090303518	BE	Sun Oct 04 2020	Oct	2020	Oct-2020	facemask
8921907	piece, plastic	51.0846808032285/3.77376354116956	BE	Sun Oct 04 2020	Oct	2020	Oct-2020	piece	plastic
8921906	plastic, wrapper	51.0846582421633/3.77368075009639	BE	Sun Oct 04 2020	Oct	2020	Oct-2020	plastic	wrapper
8921905	plastic	51.0841393616006/3.77405051347108	BE	Sun Oct 04 2020	Oct	2020	Oct-2020	plastic
8921904	wrapper, plastic	51.0844480719824/3.77394784793241	BE	Sun Oct 04 2020	Oct	2020	Oct-2020	wrapper	plastic
8921903	metal	51.0846353461095/3.7735222607109	BE	Sun Oct 04 2020	Oct	2020	Oct-2020	metal
8921902	plastic	51.0834784735068/3.7737974389724	BE	Sun Oct 04 2020	Oct	2020	Oct-2020	plastic
8921901	wrapper, plastic	51.0834924687594/3.77367051331331	BE	Sun Oct 04 2020	Oct	2020	Oct-2020	wrapper	plastic
8921900	cigarette	51.0841393616006/3.77405051347108	BE	Sun Oct 04 2020	Oct	2020	Oct-2020	cigarette
8921899	cigarette	51.0839020732223/3.77426949219776	BE	Sun Oct 04 2020	Oct	2020	Oct-2020	cigarette
8921898	plastic, wrapper	51.0840794162759/3.77414132033378	BE	Sun Oct 04 2020	Oct	2020	Oct-2020	plastic	wrapper
8921897	milkcarton	51.0834895980003/3.77339274325217	BE	Sun Oct 04 2020	Oct	2020	Oct-2020	milkcarton
8921895	plastic, wrapper	51.0841629841435/3.77429306674446	BE	Sun Oct 04 2020	Oct	2020	Oct-2020	plastic	wrapper
8921894	candy, wrapper	51.0841654726826/3.77421844440165	BE	Sun Oct 04 2020	Oct	2020	Oct-2020	candy	wrapper
8921893	glassbottle	51.0841100613762/3.77430076199163	BE	Sun Oct 04 2020	Oct	2020	Oct-2020	glassbottle
8921892	plastic, bottle	51.0840228541502/3.77420485386194	BE	Sun Oct 04 2020	Oct	2020	Oct-2020	plastic	bottle
8921891	plastic, bottle	51.0840228541502/3.77420485386194	BE	Sun Oct 04 2020	Oct	2020	Oct-2020	plastic	bottle
8921890	plastic, piece	51.0841629841435/3.77429306674446	BE	Sun Oct 04 2020	Oct	2020	Oct-2020	plastic	piece
8921889	chewinggum	51.0839854286608/3.77397307897827	BE	Sun Oct 04 2020	Oct	2020	Oct-2020	chewinggum
8921888	plastic, wrapper	51.0841163082111/3.7737914544644	BE	Sun Oct 04 2020	Oct	2020	Oct-2020	plastic	wrapper
8921887	can	51.0841538924738/3.77372114210961	BE	Sun Oct 04 2020	Oct	2020	Oct-2020	can
8921886	cigarette	51.0840400327848/3.7741319291142	BE	Sun Oct 04 2020	Oct	2020	Oct-2020	cigarette
8921885	plastic	51.0835698606365/3.77387838987439	BE	Sun Oct 04 2020	Oct	2020	Oct-2020	plastic
8835149	cigarettebutt	50.7195118504766/3.83263397531389	BE	Sat Oct 03 2020	Oct	2020	Oct-2020	cigarettebutt
8678769	paper	51.0740884926505/4.04060131016396	BE	Fri Oct 02 2020	Oct	2020	Oct-2020	paper
8649963	redbull, goldenpower, can	51.0629845/4.0217311	BE	Fri Oct 02 2020	Oct	2020	Oct-2020	redbull	goldenpower	can
8649962	plastic	51.0629542/4.0217503	BE	Fri Oct 02 2020	Oct	2020	Oct-2020	plastic
8649961	kindersurprise, plastic	51.0629676/4.0217397	BE	Fri Oct 02 2020	Oct	2020	Oct-2020	kindersurprise	plastic
8649960	cigarettefilter	51.0629724/4.0217582	BE	Fri Oct 02 2020	Oct	2020	Oct-2020	cigarettefilter
8649959	cigarette, cigarettefilter	51.0629371/4.0217921	BE	Fri Oct 02 2020	Oct	2020	Oct-2020	cigarette	cigarettefilter
8649958	bierdopje	51.0629492/4.0218197	BE	Fri Oct 02 2020	Oct	2020	Oct-2020	bierdopje
8649957	paper, kassabon	51.0629811/4.0217549	BE	Fri Oct 02 2020	Oct	2020	Oct-2020	paper	kassabon
8649956	cigarettefilter	51.0629706/4.0217641	BE	Fri Oct 02 2020	Oct	2020	Oct-2020	cigarettefilter
8649955	cigarette, cigarettefilter	51.0629522/4.0218748	BE	Fri Oct 02 2020	Oct	2020	Oct-2020	cigarette	cigarettefilter
8649954	cigarette, cigarettefilter	51.0629295/4.0217692	BE	Fri Oct 02 2020	Oct	2020	Oct-2020	cigarette	cigarettefilter
8649953	wegwerp poetsdoek	51.06294/4.0218179	BE	Fri Oct 02 2020	Oct	2020	Oct-2020	wegwerp poetsdoek
8649952	poetsdoek, wegwerp poetsdoek	51.0629472/4.021834	BE	Fri Oct 02 2020	Oct	2020	Oct-2020	poetsdoek	wegwerp poetsdoek
8649950	cigarette	51.0629294/4.0217803	BE	Fri Oct 02 2020	Oct	2020	Oct-2020	cigarette
8649948	kassabon	51.062927/4.021773	BE	Fri Oct 02 2020	Oct	2020	Oct-2020	kassabon
8649947	cigarette, sigarettenfilter	51.0629483/4.0218672	BE	Fri Oct 02 2020	Oct	2020	Oct-2020	cigarette	sigarettenfilter
8649946	wegwerp poetsdoek	51.0629544/4.0218268	BE	Fri Oct 02 2020	Oct	2020	Oct-2020	wegwerp poetsdoek
8649945	paper	51.0629253/4.0218303	BE	Fri Oct 02 2020	Oct	2020	Oct-2020	paper
8649944	aluminum, lipje	51.0629062/4.0218481	BE	Fri Oct 02 2020	Oct	2020	Oct-2020	aluminum	lipje
8649943	plastic	51.0629287/4.0217459	BE	Fri Oct 02 2020	Oct	2020	Oct-2020	plastic
8649941	kassabon, plastic	51.0629074/4.0217831	BE	Fri Oct 02 2020	Oct	2020	Oct-2020	kassabon	plastic
8649940	plastic	51.0629285/4.0217356	BE	Fri Oct 02 2020	Oct	2020	Oct-2020	plastic
8649939	metaal	51.0629295/4.0217903	BE	Fri Oct 02 2020	Oct	2020	Oct-2020	metaal
8649938	paper, kassabon	51.0629321/4.0217468	BE	Fri Oct 02 2020	Oct	2020	Oct-2020	paper	kassabon
8649937	golden power, can	51.0629374/4.0217597	BE	Fri Oct 02 2020	Oct	2020	Oct-2020	golden power	can
8649936	paper, kassabon	51.062841/4.0218885	BE	Fri Oct 02 2020	Oct	2020	Oct-2020	paper	kassabon
8649935	cigarette	51.0628846/4.0218348	BE	Fri Oct 02 2020	Oct	2020	Oct-2020	cigarette
8649934	paper, kassabon	51.062884/4.0218428	BE	Fri Oct 02 2020	Oct	2020	Oct-2020	paper	kassabon
8649933	kassabon	51.0628257/4.0219513	BE	Fri Oct 02 2020	Oct	2020	Oct-2020	kassabon
8649932	kassabon	51.062819/4.0219885	BE	Fri Oct 02 2020	Oct	2020	Oct-2020	kassabon
8649931	cigarette	51.0628262/4.0220127	BE	Fri Oct 02 2020	Oct	2020	Oct-2020	cigarette
8649930	kassabon	51.0628709/4.0219033	BE	Fri Oct 02 2020	Oct	2020	Oct-2020	kassabon
8649928	kassabon	51.0628299/4.021955	BE	Fri Oct 02 2020	Oct	2020	Oct-2020	kassabon
8649927	plastic	51.062896/4.02184	BE	Fri Oct 02 2020	Oct	2020	Oct-2020	plastic
8649926	paper	51.0628294/4.0219911	BE	Fri Oct 02 2020	Oct	2020	Oct-2020	paper
8649925	kassabon	51.0628705/4.0219038	BE	Fri Oct 02 2020	Oct	2020	Oct-2020	kassabon
8649924	paper	51.0628734/4.0218757	BE	Fri Oct 02 2020	Oct	2020	Oct-2020	paper
8649923	kassabon	51.0628257/4.0219513	BE	Fri Oct 02 2020	Oct	2020	Oct-2020	kassabon
8649922	cigarette, paper	51.0628245/4.0219903	BE	Fri Oct 02 2020	Oct	2020	Oct-2020	cigarette	paper
8649920	sigarettenfilter	51.0628465/4.0220624	BE	Fri Oct 02 2020	Oct	2020	Oct-2020	sigarettenfilter
8649919	kassabon	51.0628321/4.0220526	BE	Fri Oct 02 2020	Oct	2020	Oct-2020	kassabon
8649918	drinkcarton	51.0628314/4.0220555	BE	Fri Oct 02 2020	Oct	2020	Oct-2020	drinkcarton
8649916	cigarette	51.0628443/4.0220082	BE	Fri Oct 02 2020	Oct	2020	Oct-2020	cigarette
8649915	cigarette	51.0628365/4.0220572	BE	Fri Oct 02 2020	Oct	2020	Oct-2020	cigarette
8649914	sigarettenfilter, stukjes, papier	51.0628466/4.021999	BE	Fri Oct 02 2020	Oct	2020	Oct-2020	sigarettenfilter	stukjes	papier
8649913	paper, kassabon	51.0628279/4.022041	BE	Fri Oct 02 2020	Oct	2020	Oct-2020	paper	kassabon
8649912	cigarette	51.0628376/4.0220643	BE	Fri Oct 02 2020	Oct	2020	Oct-2020	cigarette
8649909	cigarette	51.0628345/4.0220478	BE	Fri Oct 02 2020	Oct	2020	Oct-2020	cigarette
8649906	cigarettefilter	51.0627891/4.022099	BE	Thu Oct 01 2020	Oct	2020	Oct-2020	cigarettefilter
8649905	cigarettefilter	51.0627991/4.0220783	BE	Fri Oct 02 2020	Oct	2020	Oct-2020	cigarettefilter
8649896	rubber	51.0628114/4.0220668	BE	Fri Oct 02 2020	Oct	2020	Oct-2020	rubber
8649891	fanta, can	51.0627511/4.0222176	BE	Thu Oct 01 2020	Oct	2020	Oct-2020	fanta	can
8649890	paper	51.0627495/4.0222605	BE	Thu Oct 01 2020	Oct	2020	Oct-2020	paper
8649889	sigarettenfilter	51.0627799/4.0222155	BE	Thu Oct 01 2020	Oct	2020	Oct-2020	sigarettenfilter
8649888	sigarettenfilter	51.062788/4.0221929	BE	Thu Oct 01 2020	Oct	2020	Oct-2020	sigarettenfilter
8649887	sigarettenfilter	51.0627915/4.0222186	BE	Thu Oct 01 2020	Oct	2020	Oct-2020	sigarettenfilter
8649886	sigarettenfilter	51.0627788/4.0221515	BE	Thu Oct 01 2020	Oct	2020	Oct-2020	sigarettenfilter
8649885	paper, sigarettenfilter	51.062772/4.0222347	BE	Thu Oct 01 2020	Oct	2020	Oct-2020	paper	sigarettenfilter
8649884	cigarettefilter	51.0627985/4.0221127	BE	Thu Oct 01 2020	Oct	2020	Oct-2020	cigarettefilter
8649883	paper, plastic	51.0627534/4.0222263	BE	Thu Oct 01 2020	Oct	2020	Oct-2020	paper	plastic
8649882	sigarettenfilter	51.0627963/4.022234	BE	Thu Oct 01 2020	Oct	2020	Oct-2020	sigarettenfilter
8649881	plastic	51.062789/4.0221823	BE	Thu Oct 01 2020	Oct	2020	Oct-2020	plastic
8649880	sigarettenfilter	51.0627769/4.0222082	BE	Thu Oct 01 2020	Oct	2020	Oct-2020	sigarettenfilter
8649879	wegwerp poetsdoek	51.0628004/4.022144	BE	Thu Oct 01 2020	Oct	2020	Oct-2020	wegwerp poetsdoek
8649878	paper, kassabon	51.0627864/4.0222422	BE	Thu Oct 01 2020	Oct	2020	Oct-2020	paper	kassabon
8649877	plastic	51.0627733/4.0222414	BE	Thu Oct 01 2020	Oct	2020	Oct-2020	plastic
8547085	cigarette, cigarettebutt	50.7512689257428/3.59603943922388	BE	Wed Sep 30 2020	Sep	2020	Sep-2020	cigarette	cigarettebutt
8543671	tissue	50.8676525/4.6535913	BE	Wed Sep 30 2020	Sep	2020	Sep-2020	tissue
8527195	sigarettenpeuk	51.074012846119/4.04183302037507	BE	Wed Sep 30 2020	Sep	2020	Sep-2020	sigarettenpeuk
8527191	hout	51.0741406133223/4.04225874258079	BE	Wed Sep 30 2020	Sep	2020	Sep-2020	hout
8527190	plastic, folie	51.0740532415941/4.04224182245322	BE	Wed Sep 30 2020	Sep	2020	Sep-2020	plastic	folie
8527188	isolatiemateriaal	51.0740019648677/4.04226671173745	BE	Wed Sep 30 2020	Sep	2020	Sep-2020	isolatiemateriaal
8507004	cigarette, cigarettebutt	51.0392886261874/3.72938136854601	BE	Tue Sep 29 2020	Sep	2020	Sep-2020	cigarette	cigarettebutt
8507003	cigarette, cigarettebutt	51.0395608605581/3.72946398299225	BE	Tue Sep 29 2020	Sep	2020	Sep-2020	cigarette	cigarettebutt
8507002	cigarette, cigarettebutt	51.0395611717782/3.72947822097827	BE	Tue Sep 29 2020	Sep	2020	Sep-2020	cigarette	cigarettebutt
8507001	cigarette, cigarettebutt	51.0393131388111/3.72938870662712	BE	Tue Sep 29 2020	Sep	2020	Sep-2020	cigarette	cigarettebutt
8507000	cigarette, cigarettebutt	51.0395433486866/3.72945440517244	BE	Tue Sep 29 2020	Sep	2020	Sep-2020	cigarette	cigarettebutt
8506999	cigarette, cigarettebutt	51.0394685448769/3.72943374449763	BE	Tue Sep 29 2020	Sep	2020	Sep-2020	cigarette	cigarettebutt
8506998	cigarette, cigarettebutt	51.0394196836703/3.72944000001235	BE	Tue Sep 29 2020	Sep	2020	Sep-2020	cigarette	cigarettebutt
8506997	cigarette, cigarettebutt	51.0395608701984/3.72949748642965	BE	Tue Sep 29 2020	Sep	2020	Sep-2020	cigarette	cigarettebutt
8506996	cigarette, cigarettebutt	51.0395225193145/3.72942885513931	BE	Tue Sep 29 2020	Sep	2020	Sep-2020	cigarette	cigarettebutt
8506995	cigarette, cigarettebutt	51.0394032272524/3.7294665324359	BE	Tue Sep 29 2020	Sep	2020	Sep-2020	cigarette	cigarettebutt
8506994	cigarette, cigarettebutt	51.0394597121198/3.72943034960053	BE	Tue Sep 29 2020	Sep	2020	Sep-2020	cigarette	cigarettebutt
8506993	cigarette, cigarettebutt	51.0390877533008/3.72934180610562	BE	Tue Sep 29 2020	Sep	2020	Sep-2020	cigarette	cigarettebutt
8506992	cigarette, cigarettebutt	51.0390883816893/3.72934113273912	BE	Tue Sep 29 2020	Sep	2020	Sep-2020	cigarette	cigarettebutt
8506991	cigarette, cigarettebutt	51.0395621140462/3.72903399238813	BE	Tue Sep 29 2020	Sep	2020	Sep-2020	cigarette	cigarettebutt
8506990	cigarette, cigarettebutt	51.0395621140462/3.72903399238813	BE	Tue Sep 29 2020	Sep	2020	Sep-2020	cigarette	cigarettebutt
8506989	cigarette, cigarettebutt	51.0395621140462/3.72903399238813	BE	Tue Sep 29 2020	Sep	2020	Sep-2020	cigarette	cigarettebutt
8506988	cigarette, cigarettebutt	51.0394120911791/3.72922271391293	BE	Tue Sep 29 2020	Sep	2020	Sep-2020	cigarette	cigarettebutt
8506987	cigarette, cigarettebutt	51.0395659104341/3.72913985458478	BE	Tue Sep 29 2020	Sep	2020	Sep-2020	cigarette	cigarettebutt
8506986	cigarette, cigarettebutt	51.0394258414116/3.72913994663647	BE	Tue Sep 29 2020	Sep	2020	Sep-2020	cigarette	cigarettebutt
8506985	cigarette, cigarettebutt	51.0396290676798/3.72932676525145	BE	Tue Sep 29 2020	Sep	2020	Sep-2020	cigarette	cigarettebutt
8506984	cigarette, cigarettebutt	51.0393867863451/3.7293038292728	BE	Tue Sep 29 2020	Sep	2020	Sep-2020	cigarette	cigarettebutt
8506983	cigarette, cigarettebutt	51.0393916530556/3.72933142729112	BE	Tue Sep 29 2020	Sep	2020	Sep-2020	cigarette	cigarettebutt
8506982	cigarette, cigarettebutt	51.0396464811923/3.72932785536255	BE	Tue Sep 29 2020	Sep	2020	Sep-2020	cigarette	cigarettebutt
8506981	cigarette, cigarettebutt	51.0396290676798/3.72932676525145	BE	Tue Sep 29 2020	Sep	2020	Sep-2020	cigarette	cigarettebutt
8506980	cigarette, cigarettebutt	51.0396290676798/3.72932676525145	BE	Tue Sep 29 2020	Sep	2020	Sep-2020	cigarette	cigarettebutt
8506979	cigarette, cigarettebutt	51.0396290676798/3.72932676525145	BE	Tue Sep 29 2020	Sep	2020	Sep-2020	cigarette	cigarettebutt
8506978	cigarette, cigarettebutt	51.0396290676798/3.72932676525145	BE	Tue Sep 29 2020	Sep	2020	Sep-2020	cigarette	cigarettebutt
8506977	cigarette, cigarettebutt	51.0396290676798/3.72932676525145	BE	Tue Sep 29 2020	Sep	2020	Sep-2020	cigarette	cigarettebutt
8506976	cigarette, cigarettebutt	51.0395827805912/3.72933250288318	BE	Tue Sep 29 2020	Sep	2020	Sep-2020	cigarette	cigarettebutt
8506975	cigarette, cigarettebutt	51.0393386525915/3.72933507945318	BE	Tue Sep 29 2020	Sep	2020	Sep-2020	cigarette	cigarettebutt
8506974	cigarette, cigarettebutt	51.039582428094/3.72935270342189	BE	Tue Sep 29 2020	Sep	2020	Sep-2020	cigarette	cigarettebutt
8506973	cigarette, cigarettebutt	51.0395827805912/3.72933250288318	BE	Tue Sep 29 2020	Sep	2020	Sep-2020	cigarette	cigarettebutt
8506972	cigarette, cigarettebutt	51.0394540785335/3.72947281213715	BE	Tue Sep 29 2020	Sep	2020	Sep-2020	cigarette	cigarettebutt
8506971	cigarette, cigarettebutt	51.039258858565/3.72933134574151	BE	Tue Sep 29 2020	Sep	2020	Sep-2020	cigarette	cigarettebutt
8506970	cigarette, cigarettebutt	51.039258858565/3.72933134574151	BE	Tue Sep 29 2020	Sep	2020	Sep-2020	cigarette	cigarettebutt
8506969	cigarette, cigarettebutt	51.039258858565/3.72933134574151	BE	Tue Sep 29 2020	Sep	2020	Sep-2020	cigarette	cigarettebutt
8506968	cigarette, cigarettebutt	51.039258858565/3.72933134574151	BE	Tue Sep 29 2020	Sep	2020	Sep-2020	cigarette	cigarettebutt
8506967	cigarette, cigarettebutt	51.039258858565/3.72933134574151	BE	Tue Sep 29 2020	Sep	2020	Sep-2020	cigarette	cigarettebutt
8506966	cigarette, cigarettebutt	51.039258858565/3.72933134574151	BE	Tue Sep 29 2020	Sep	2020	Sep-2020	cigarette	cigarettebutt
8506965	cigarette, cigarettebutt	51.039258858565/3.72933134574151	BE	Tue Sep 29 2020	Sep	2020	Sep-2020	cigarette	cigarettebutt
8506964	cigarette, cigarettebutt	51.0393653705653/3.72933291296894	BE	Tue Sep 29 2020	Sep	2020	Sep-2020	cigarette	cigarettebutt
8506963	cigarette, cigarettebutt	51.039258858565/3.72933134574151	BE	Tue Sep 29 2020	Sep	2020	Sep-2020	cigarette	cigarettebutt
8506962	cigarette, cigarettebutt	51.0390883458312/3.72933360046546	BE	Tue Sep 29 2020	Sep	2020	Sep-2020	cigarette	cigarettebutt
8506961	cigarette, cigarettebutt	51.0390878005063/3.72933362162585	BE	Tue Sep 29 2020	Sep	2020	Sep-2020	cigarette	cigarettebutt
8506960	cigarette, cigarettebutt	51.0395320598651/3.72888765454949	BE	Tue Sep 29 2020	Sep	2020	Sep-2020	cigarette	cigarettebutt
8506959	cigarette, cigarettebutt	51.0395320598651/3.72888765454949	BE	Tue Sep 29 2020	Sep	2020	Sep-2020	cigarette	cigarettebutt
8506958	cigarette, cigarettebutt	51.0393654690051/3.72933282043797	BE	Tue Sep 29 2020	Sep	2020	Sep-2020	cigarette	cigarettebutt
8506957	cigarette, cigarettebutt	51.0395320598651/3.72888765454949	BE	Tue Sep 29 2020	Sep	2020	Sep-2020	cigarette	cigarettebutt
8506956	cigarette, cigarettebutt	51.0395320598651/3.72888765454949	BE	Tue Sep 29 2020	Sep	2020	Sep-2020	cigarette	cigarettebutt
8506955	cigarette, cigarettebutt	51.0395320598651/3.72888765454949	BE	Tue Sep 29 2020	Sep	2020	Sep-2020	cigarette	cigarettebutt
8506954	cigarette, cigarettebutt	51.0395320598651/3.72888765454949	BE	Tue Sep 29 2020	Sep	2020	Sep-2020	cigarette	cigarettebutt
8506953	cigarette, cigarettebutt	51.0395320598651/3.72888765454949	BE	Tue Sep 29 2020	Sep	2020	Sep-2020	cigarette	cigarettebutt
8506952	cigarette, cigarettebutt	51.0395320598651/3.72888765454949	BE	Tue Sep 29 2020	Sep	2020	Sep-2020	cigarette	cigarettebutt
8506951	cigarette, cigarettebutt	51.0395320598651/3.72888765454949	BE	Tue Sep 29 2020	Sep	2020	Sep-2020	cigarette	cigarettebutt
8506950	cigarette, cigarettebutt	51.0395320598651/3.72888765454949	BE	Tue Sep 29 2020	Sep	2020	Sep-2020	cigarette	cigarettebutt
8506949	cigarette, cigarettebutt	51.0395320598651/3.72888765454949	BE	Tue Sep 29 2020	Sep	2020	Sep-2020	cigarette	cigarettebutt
8506948	cigarette, cigarettebutt	51.0395320598651/3.72888765454949	BE	Tue Sep 29 2020	Sep	2020	Sep-2020	cigarette	cigarettebutt
8506947	cigarette, cigarettebutt	51.0395320598651/3.72888765454949	BE	Tue Sep 29 2020	Sep	2020	Sep-2020	cigarette	cigarettebutt
8506946	cigarette, cigarettebutt	51.0395320598651/3.72888765454949	BE	Tue Sep 29 2020	Sep	2020	Sep-2020	cigarette	cigarettebutt
8506945	cigarette, cigarettebutt	51.0395320598651/3.72888765454949	BE	Tue Sep 29 2020	Sep	2020	Sep-2020	cigarette	cigarettebutt
8506944	cigarette, cigarettebutt	51.0395320598651/3.72888765454949	BE	Tue Sep 29 2020	Sep	2020	Sep-2020	cigarette	cigarettebutt
8506943	cigarette, cigarettebutt	51.0395862843064/3.72895399421453	BE	Tue Sep 29 2020	Sep	2020	Sep-2020	cigarette	cigarettebutt
8506942	cigarette, cigarettebutt	51.039608742227/3.72909678240421	BE	Tue Sep 29 2020	Sep	2020	Sep-2020	cigarette	cigarettebutt
8506941	cigarette, cigarettebutt	51.039608742227/3.72909678240421	BE	Tue Sep 29 2020	Sep	2020	Sep-2020	cigarette	cigarettebutt
8506940	cigarette, cigarettebutt	51.039608742227/3.72909678240421	BE	Tue Sep 29 2020	Sep	2020	Sep-2020	cigarette	cigarettebutt
8506939	cigarette, cigarettebutt	51.039608742227/3.72909678240421	BE	Tue Sep 29 2020	Sep	2020	Sep-2020	cigarette	cigarettebutt
8506938	cigarette, cigarettebutt	51.039608742227/3.72909678240421	BE	Tue Sep 29 2020	Sep	2020	Sep-2020	cigarette	cigarettebutt
8506937	cigarette, cigarettebutt	51.0395828849772/3.72913707635846	BE	Tue Sep 29 2020	Sep	2020	Sep-2020	cigarette	cigarettebutt
8506936	cigarette, cigarettebutt	51.0395828849772/3.72913707635846	BE	Tue Sep 29 2020	Sep	2020	Sep-2020	cigarette	cigarettebutt
8506935	cigarette, cigarettebutt	51.0394973238731/3.7294983554941	BE	Tue Sep 29 2020	Sep	2020	Sep-2020	cigarette	cigarettebutt
8506934	cigarette, cigarettebutt	51.0394838595919/3.72958996735059	BE	Tue Sep 29 2020	Sep	2020	Sep-2020	cigarette	cigarettebutt
8506933	cigarette, cigarettebutt	51.0395897401708/3.72901758768908	BE	Tue Sep 29 2020	Sep	2020	Sep-2020	cigarette	cigarettebutt
8506932	cigarette, cigarettebutt	51.0395874179123/3.72919065155077	BE	Tue Sep 29 2020	Sep	2020	Sep-2020	cigarette	cigarettebutt
8506931	cigarette, cigarettebutt	51.0395874179123/3.72919065155077	BE	Tue Sep 29 2020	Sep	2020	Sep-2020	cigarette	cigarettebutt
8506930	cigarette, cigarettebutt	51.0395874179123/3.72919065155077	BE	Tue Sep 29 2020	Sep	2020	Sep-2020	cigarette	cigarettebutt
8506929	cigarette, cigarettebutt	51.0395874179123/3.72919065155077	BE	Tue Sep 29 2020	Sep	2020	Sep-2020	cigarette	cigarettebutt
8506928	cigarette, cigarettebutt	51.0395874179123/3.72919065155077	BE	Tue Sep 29 2020	Sep	2020	Sep-2020	cigarette	cigarettebutt
8506927	cigarette, cigarettebutt	51.0395874179123/3.72919065155077	BE	Tue Sep 29 2020	Sep	2020	Sep-2020	cigarette	cigarettebutt
8506926	cigarette, cigarettebutt	51.0395874179123/3.72919065155077	BE	Tue Sep 29 2020	Sep	2020	Sep-2020	cigarette	cigarettebutt
8506925	cigarette, cigarettebutt	51.0395874179123/3.72919065155077	BE	Tue Sep 29 2020	Sep	2020	Sep-2020	cigarette	cigarettebutt
8506924	cigarette, cigarettebutt	51.0395874179123/3.72919065155077	BE	Tue Sep 29 2020	Sep	2020	Sep-2020	cigarette	cigarettebutt
8506923	cigarette, cigarettebutt	51.0395874179123/3.72919065155077	BE	Tue Sep 29 2020	Sep	2020	Sep-2020	cigarette	cigarettebutt
8506922	cigarette, cigarettebutt	51.0395385674964/3.72932654256139	BE	Tue Sep 29 2020	Sep	2020	Sep-2020	cigarette	cigarettebutt
8506921	cigarette, cigarettebutt	51.0395874179123/3.72919065155077	BE	Tue Sep 29 2020	Sep	2020	Sep-2020	cigarette	cigarettebutt
8506920	cigarette, cigarettebutt	51.0395874179123/3.72919065155077	BE	Tue Sep 29 2020	Sep	2020	Sep-2020	cigarette	cigarettebutt
8506919	cigarette, cigarettebutt	51.0395874179123/3.72919065155077	BE	Tue Sep 29 2020	Sep	2020	Sep-2020	cigarette	cigarettebutt
8506918	cigarette, cigarettebutt	51.0395874179123/3.72919065155077	BE	Tue Sep 29 2020	Sep	2020	Sep-2020	cigarette	cigarettebutt
8506917	cigarette, cigarettebutt	51.0395789002795/3.7291317613909	BE	Tue Sep 29 2020	Sep	2020	Sep-2020	cigarette	cigarettebutt
8506916	cigarette, cigarettebutt	51.0395874179123/3.72919065155077	BE	Tue Sep 29 2020	Sep	2020	Sep-2020	cigarette	cigarettebutt
8506915	cigarette, cigarettebutt	51.0395874179123/3.72919065155077	BE	Tue Sep 29 2020	Sep	2020	Sep-2020	cigarette	cigarettebutt
8506914	cigarette, cigarettebutt	51.0395757262343/3.72910931035305	BE	Tue Sep 29 2020	Sep	2020	Sep-2020	cigarette	cigarettebutt
8506913	cigarette, cigarettebutt	51.039543950199/3.72932630317509	BE	Tue Sep 29 2020	Sep	2020	Sep-2020	cigarette	cigarettebutt
8506912	cigarette, cigarettebutt	51.0395385674964/3.72932654256139	BE	Tue Sep 29 2020	Sep	2020	Sep-2020	cigarette	cigarettebutt
8506911	cigarette, cigarettebutt	51.039543950199/3.72932630317509	BE	Tue Sep 29 2020	Sep	2020	Sep-2020	cigarette	cigarettebutt
8506910	cigarette, cigarettebutt	51.0394867822384/3.72932599870179	BE	Tue Sep 29 2020	Sep	2020	Sep-2020	cigarette	cigarettebutt
8506909	cigarette, cigarettebutt	51.039543950199/3.72932630317509	BE	Tue Sep 29 2020	Sep	2020	Sep-2020	cigarette	cigarettebutt
8506908	cigarette, cigarettebutt	51.0395385674964/3.72932654256139	BE	Tue Sep 29 2020	Sep	2020	Sep-2020	cigarette	cigarettebutt
8506907	cigarette, cigarettebutt	51.0395385674964/3.72932654256139	BE	Tue Sep 29 2020	Sep	2020	Sep-2020	cigarette	cigarettebutt
8506906	cigarette, cigarettebutt	51.0395385674964/3.72932654256139	BE	Tue Sep 29 2020	Sep	2020	Sep-2020	cigarette	cigarettebutt
8506905	cigarette, cigarettebutt	51.0394668348798/3.7293181120354	BE	Tue Sep 29 2020	Sep	2020	Sep-2020	cigarette	cigarettebutt
8506904	cigarette, cigarettebutt	51.0395775424103/3.72909605845599	BE	Tue Sep 29 2020	Sep	2020	Sep-2020	cigarette	cigarettebutt
8506903	cigarette, cigarettebutt	51.0395775424103/3.72909605845599	BE	Tue Sep 29 2020	Sep	2020	Sep-2020	cigarette	cigarettebutt
8506902	cigarette, cigarettebutt	51.0395775424103/3.72909605845599	BE	Tue Sep 29 2020	Sep	2020	Sep-2020	cigarette	cigarettebutt
8506901	cigarette, cigarettebutt	51.0395775424103/3.72909605845599	BE	Tue Sep 29 2020	Sep	2020	Sep-2020	cigarette	cigarettebutt
8506900	cigarette, cigarettebutt	51.0395775424103/3.72909605845599	BE	Tue Sep 29 2020	Sep	2020	Sep-2020	cigarette	cigarettebutt
8506899	cigarette, cigarettebutt	51.03957478699/3.72909903068969	BE	Tue Sep 29 2020	Sep	2020	Sep-2020	cigarette	cigarettebutt
8506898	cigarette, cigarettebutt	51.0395775424103/3.72909605845599	BE	Tue Sep 29 2020	Sep	2020	Sep-2020	cigarette	cigarettebutt
8484664	cigarette, cigarettebutt	51.1558371851523/3.73210871266764	BE	Tue Sep 29 2020	Sep	2020	Sep-2020	cigarette	cigarettebutt
8477638	metal, rondel	51.0738647312509/4.04134241310676	BE	Tue Sep 29 2020	Sep	2020	Sep-2020	metal	rondel
8477637	plastic, strap	51.0742925509483/4.04165216663089	BE	Tue Sep 29 2020	Sep	2020	Sep-2020	plastic	strap
8477636	isolatiemateriaal, purschuim	51.0740149138864/4.04154689362814	BE	Tue Sep 29 2020	Sep	2020	Sep-2020	isolatiemateriaal	purschuim
8477635	snoepverpakking	51.074376316741/4.0418713596419	BE	Tue Sep 29 2020	Sep	2020	Sep-2020	snoepverpakking
8477633	etiket	51.0744459842962/4.04180962286715	BE	Tue Sep 29 2020	Sep	2020	Sep-2020	etiket
8477632	plastic, folie	51.0744737768649/4.04194166639552	BE	Tue Sep 29 2020	Sep	2020	Sep-2020	plastic	folie
8477631	katoen, doek	51.0747486709476/4.04197069181157	BE	Tue Sep 29 2020	Sep	2020	Sep-2020	katoen	doek
8477630	plastic, folie	51.0745548793229/4.04181947294143	BE	Tue Sep 29 2020	Sep	2020	Sep-2020	plastic	folie
8477629	plastic, folie	51.0748420446025/4.04183036420905	BE	Tue Sep 29 2020	Sep	2020	Sep-2020	plastic	folie
8477628	rubber, afdichtring	51.0748968084064/4.04215912250215	BE	Tue Sep 29 2020	Sep	2020	Sep-2020	rubber	afdichtring
8477622	sigarettenpeuk	51.0745576303584/4.04221868283987	BE	Tue Sep 29 2020	Sep	2020	Sep-2020	sigarettenpeuk
8477621	plastic, zakje	51.0746194625018/4.04217446982118	BE	Tue Sep 29 2020	Sep	2020	Sep-2020	plastic	zakje
8477590	barcodesticker	51.0746998817234/4.0421504883455	BE	Tue Sep 29 2020	Sep	2020	Sep-2020	barcodesticker
8477573	glas	51.0745789294051/4.04218321067754	BE	Tue Sep 29 2020	Sep	2020	Sep-2020	glas
8477572	bottlecap, plastic	51.0743120100537/4.0422723074626	BE	Tue Sep 29 2020	Sep	2020	Sep-2020	bottlecap	plastic
8477571	rubber, dichtingsring	51.0747445429785/4.04227257362653	BE	Tue Sep 29 2020	Sep	2020	Sep-2020	rubber	dichtingsring
8477570	plastic, foil	51.0742939874238/4.0419917837157	BE	Tue Sep 29 2020	Sep	2020	Sep-2020	plastic	foil
8477568	plastic, folie	51.0742145302391/4.04202927498522	BE	Tue Sep 29 2020	Sep	2020	Sep-2020	plastic	folie
8477567	plastic, zakje	51.074292337984/4.04211527843597	BE	Tue Sep 29 2020	Sep	2020	Sep-2020	plastic	zakje
8477566	paper	51.074292337984/4.04211527843597	BE	Tue Sep 29 2020	Sep	2020	Sep-2020	paper
8477565	paper	51.0742966335606/4.04215025541834	BE	Tue Sep 29 2020	Sep	2020	Sep-2020	paper
8477564	paper	51.0742397110304/4.04219309647887	BE	Tue Sep 29 2020	Sep	2020	Sep-2020	paper
8477563	plastic	51.0743316035698/4.04222827060322	BE	Tue Sep 29 2020	Sep	2020	Sep-2020	plastic
8477562	textiel	51.0743387183902/4.04212170011454	BE	Tue Sep 29 2020	Sep	2020	Sep-2020	textiel
8477560	paper	51.0743387183902/4.04212170011454	BE	Tue Sep 29 2020	Sep	2020	Sep-2020	paper
8477559	papier	51.0743338803195/4.04210002984707	BE	Tue Sep 29 2020	Sep	2020	Sep-2020	papier
8477558	tape	51.0743063051579/4.04207666618068	BE	Tue Sep 29 2020	Sep	2020	Sep-2020	tape
8477557	paper	51.0743158952115/4.04205155392825	BE	Tue Sep 29 2020	Sep	2020	Sep-2020	paper
8477543	mondmasker	51.0743126156158/4.04201803347259	BE	Tue Sep 29 2020	Sep	2020	Sep-2020	mondmasker
8477538	paper	51.0743106067994/4.04199320934404	BE	Tue Sep 29 2020	Sep	2020	Sep-2020	paper
8477532	papier	51.074258028956/4.04210400107741	BE	Tue Sep 29 2020	Sep	2020	Sep-2020	papier
8477522	karton	51.074258028956/4.04210400107741	BE	Tue Sep 29 2020	Sep	2020	Sep-2020	karton
8477513	plastic, folie	51.0741488090148/4.04230847336194	BE	Tue Sep 29 2020	Sep	2020	Sep-2020	plastic	folie
8477512	rubber	51.074263755582/4.04211474393606	BE	Tue Sep 29 2020	Sep	2020	Sep-2020	rubber
8477511	plastic, folie	51.0744834447073/4.04252668266946	BE	Tue Sep 29 2020	Sep	2020	Sep-2020	plastic	folie
8477510	metaal, bout	51.0745144966974/4.04289159662895	BE	Tue Sep 29 2020	Sep	2020	Sep-2020	metaal	bout
8477500	bottlecap, plastic	51.0744860751588/4.04302174390797	BE	Tue Sep 29 2020	Sep	2020	Sep-2020	bottlecap	plastic
8477499	karton, koker	51.0747482471153/4.04262150197364	BE	Tue Sep 29 2020	Sep	2020	Sep-2020	karton	koker
8477498	karton	51.0745371354672/4.04322089380643	BE	Tue Sep 29 2020	Sep	2020	Sep-2020	karton
8477497	karton	51.0745126033314/4.04322610561999	BE	Tue Sep 29 2020	Sep	2020	Sep-2020	karton
8477495	paper	51.0741319611838/4.04356359412191	BE	Tue Sep 29 2020	Sep	2020	Sep-2020	paper
8477494	tape, tesa	51.0745028203592/4.04291717885987	BE	Tue Sep 29 2020	Sep	2020	Sep-2020	tape	tesa
8477493	karton	51.0745341024509/4.042680040576	BE	Tue Sep 29 2020	Sep	2020	Sep-2020	karton
8477492	karton	51.0744471326537/4.04286070363514	BE	Tue Sep 29 2020	Sep	2020	Sep-2020	karton
8477491	plastic, etensverpakking	51.1197660094207/3.99589610186324	BE	Mon Sep 28 2020	Sep	2020	Sep-2020	plastic	etensverpakking
8477490	plastic, snoepverpakking	51.1197832024716/3.99595112806188	BE	Mon Sep 28 2020	Sep	2020	Sep-2020	plastic	snoepverpakking
8477481	plastic, rod, lollystick	51.1095546330709/3.99194912063119	BE	Mon Sep 28 2020	Sep	2020	Sep-2020	plastic	rod	lollystick
8477479	sigattenpeuk	51.1091445337055/3.99127641183291	BE	Mon Sep 28 2020	Sep	2020	Sep-2020	sigattenpeuk
8477478	sigattenpeuk	51.1089082617683/3.9911130326638	BE	Mon Sep 28 2020	Sep	2020	Sep-2020	sigattenpeuk
8477477	sigattenpeuk	51.1089947292168/3.99115950953946	BE	Mon Sep 28 2020	Sep	2020	Sep-2020	sigattenpeuk
8477476	sigattenpeuk	51.1089255363055/3.99106308280956	BE	Mon Sep 28 2020	Sep	2020	Sep-2020	sigattenpeuk
8477475	sigattenpeuk	51.1090354911439/3.99105091132073	BE	Mon Sep 28 2020	Sep	2020	Sep-2020	sigattenpeuk
8477474	sigattenpeuk	51.1088125717125/3.9909505835302	BE	Mon Sep 28 2020	Sep	2020	Sep-2020	sigattenpeuk
8477473	aluminumfoil	51.1085182611917/3.99084809568331	BE	Mon Sep 28 2020	Sep	2020	Sep-2020	aluminumfoil
8477472	sigattenpeuk	51.1090666542405/3.99109899362982	BE	Mon Sep 28 2020	Sep	2020	Sep-2020	sigattenpeuk
8477471	sigattenpeuk	51.1089743609892/3.99122086288879	BE	Mon Sep 28 2020	Sep	2020	Sep-2020	sigattenpeuk
8477470	sigattenpeuk	51.1089885837134/3.99124587370196	BE	Mon Sep 28 2020	Sep	2020	Sep-2020	sigattenpeuk
8477467	sigattenpeuk	51.1089802142382/3.99119822053187	BE	Mon Sep 28 2020	Sep	2020	Sep-2020	sigattenpeuk
8477466	sigattenpeuk	51.1089686971534/3.99113056889674	BE	Mon Sep 28 2020	Sep	2020	Sep-2020	sigattenpeuk
8477465	sigattenpeuk	51.1686259638369/4.15221723755697	BE	Mon Sep 28 2020	Sep	2020	Sep-2020	sigattenpeuk
8477462	afvalzak, vuilestorters	51.1686229872155/4.15221705946319	BE	Mon Sep 28 2020	Sep	2020	Sep-2020	afvalzak	vuilestorters
8477460	bottle, plastic, olijf	51.1686359648467/4.15222889861853	BE	Mon Sep 28 2020	Sep	2020	Sep-2020	bottle	plastic	olijf
8477459	sigattenpeuk	51.1090289937595/3.9911604338662	BE	Mon Sep 28 2020	Sep	2020	Sep-2020	sigattenpeuk
8477452	sigattenpeuk	51.1090928427876/3.99125690540367	BE	Mon Sep 28 2020	Sep	2020	Sep-2020	sigattenpeuk
8477446	sigattenpeuk	51.1090834551422/3.99120081713021	BE	Mon Sep 28 2020	Sep	2020	Sep-2020	sigattenpeuk
8477441	sigattenpeuk	51.1090428733765/3.99115738187773	BE	Mon Sep 28 2020	Sep	2020	Sep-2020	sigattenpeuk
8477440	sigattenpeuk	51.1090288599497/3.9914109029511	BE	Mon Sep 28 2020	Sep	2020	Sep-2020	sigattenpeuk
8477437	plastic	51.1094976167498/3.99207425153737	BE	Mon Sep 28 2020	Sep	2020	Sep-2020	plastic
8477436	kauwgomverpakking	51.1096471070707/3.99209494936632	BE	Mon Sep 28 2020	Sep	2020	Sep-2020	kauwgomverpakking
8477435	sigattenpeuk	51.1094976167498/3.99207425153737	BE	Mon Sep 28 2020	Sep	2020	Sep-2020	sigattenpeuk
8477434	zak, plasticbag	51.1094006573051/3.99190924930864	BE	Mon Sep 28 2020	Sep	2020	Sep-2020	zak	plasticbag
8477433	plastic	51.1094135664924/3.99211838736353	BE	Mon Sep 28 2020	Sep	2020	Sep-2020	plastic
8477431	sigattenpeuk	51.1095461754329/3.99196948538453	BE	Mon Sep 28 2020	Sep	2020	Sep-2020	sigattenpeuk
8477429	plastic	51.0739789944987/4.0414379426741	BE	Mon Sep 28 2020	Sep	2020	Sep-2020	plastic
8477428	zak, plasticbag, action	51.1094404468707/3.99213587191134	BE	Mon Sep 28 2020	Sep	2020	Sep-2020	zak	plasticbag	action
8477009	can	51.0736185194839/4.0413089655232	BE	Tue Sep 29 2020	Sep	2020	Sep-2020	can
8477005	bottle	51.0735854259631/4.0413219133893	BE	Tue Sep 29 2020	Sep	2020	Sep-2020	bottle
8472429	cigarette	50.9322134635414/5.32983894472549	BE	Mon Sep 28 2020	Sep	2020	Sep-2020	cigarette
8472428	metal	50.9320977151926/5.3297375327761	BE	Mon Sep 28 2020	Sep	2020	Sep-2020	metal
8472427	tissue	50.9322012845345/5.3298236135949	BE	Mon Sep 28 2020	Sep	2020	Sep-2020	tissue
8452034	plastic	50.9318445910209/5.33014576294925	BE	Mon Sep 28 2020	Sep	2020	Sep-2020	plastic
8452033	plastic	50.9314207024255/5.328022131705	BE	Mon Sep 28 2020	Sep	2020	Sep-2020	plastic
8452032	metal piece	50.9321052628112/5.33155543730159	BE	Mon Sep 28 2020	Sep	2020	Sep-2020	metal piece
8452031	butt	50.9320503194359/5.33153397962947	BE	Mon Sep 28 2020	Sep	2020	Sep-2020	butt
8452030	mcdonalds	50.9320468828556/5.33153682947655	BE	Mon Sep 28 2020	Sep	2020	Sep-2020	mcdonalds
8452029	can	50.9315259475735/5.32864959911008	BE	Mon Sep 28 2020	Sep	2020	Sep-2020	can
8452028	champagnefles	50.931498035836/5.32874548808236	BE	Mon Sep 28 2020	Sep	2020	Sep-2020	champagnefles
8452027	wrapper	50.9316065223077/5.3287979909524	BE	Mon Sep 28 2020	Sep	2020	Sep-2020	wrapper
8452026	plastic	50.9319839234808/5.32959813593536	BE	Mon Sep 28 2020	Sep	2020	Sep-2020	plastic
8452025	plastic, straw	50.9317423683134/5.33037308604022	BE	Mon Sep 28 2020	Sep	2020	Sep-2020	plastic	straw
8452024	candy	50.9318493633074/5.32985793427129	BE	Mon Sep 28 2020	Sep	2020	Sep-2020	candy
8452023	butt	50.9317252273214/5.33117280342181	BE	Mon Sep 28 2020	Sep	2020	Sep-2020	butt
8452022	butt	50.9318963857842/5.33112620004018	BE	Mon Sep 28 2020	Sep	2020	Sep-2020	butt
8452021	paper	50.9320827154917/5.33151512034734	BE	Mon Sep 28 2020	Sep	2020	Sep-2020	paper
8452020	butt	50.9318353236196/5.33124136738976	BE	Mon Sep 28 2020	Sep	2020	Sep-2020	butt
8452019	can	50.9319484413687/5.33125491923017	BE	Mon Sep 28 2020	Sep	2020	Sep-2020	can
8452018	plastic bottle	50.9321599128199/5.33134739846488	BE	Mon Sep 28 2020	Sep	2020	Sep-2020	plastic bottle
8451953	bottle, glass	50.9315582598103/5.32811759971578	BE	Mon Sep 28 2020	Sep	2020	Sep-2020	bottle	glass
8451952	cigarettebox	50.9315068787438/5.32860936597486	BE	Mon Sep 28 2020	Sep	2020	Sep-2020	cigarettebox
8451951	cup, paper	50.9315068787438/5.32860936597486	BE	Mon Sep 28 2020	Sep	2020	Sep-2020	cup	paper
8451950	plastic	50.9316380136189/5.32853149809439	BE	Mon Sep 28 2020	Sep	2020	Sep-2020	plastic
8451949	bottlecap	50.9317921149087/5.32858639956017	BE	Mon Sep 28 2020	Sep	2020	Sep-2020	bottlecap
8451948	can, metal	50.9319700208036/5.32870667987068	BE	Mon Sep 28 2020	Sep	2020	Sep-2020	can	metal
8451947	plastic, wrapper	50.9318334796009/5.3287625033458	BE	Mon Sep 28 2020	Sep	2020	Sep-2020	plastic	wrapper
8451946	wrapper	50.9320964199034/5.3299042023768	BE	Mon Sep 28 2020	Sep	2020	Sep-2020	wrapper
8451945	can, aluminum	50.9322457015989/5.32982759178181	BE	Mon Sep 28 2020	Sep	2020	Sep-2020	can	aluminum
8451944	cup	50.9317999519882/5.33001098782321	BE	Mon Sep 28 2020	Sep	2020	Sep-2020	cup
8451943	paper, wrapper	50.9318160871518/5.3298452775975	BE	Mon Sep 28 2020	Sep	2020	Sep-2020	paper	wrapper
8451942	cigarettepack	50.9315843275291/5.33111312427123	BE	Mon Sep 28 2020	Sep	2020	Sep-2020	cigarettepack
8451941	butt	50.9317071643201/5.33128478564818	BE	Mon Sep 28 2020	Sep	2020	Sep-2020	butt
8451940	plastic	50.9316225070981/5.33060434274872	BE	Mon Sep 28 2020	Sep	2020	Sep-2020	plastic
8451938	cigarette	50.9316864610193/5.33129140735169	BE	Mon Sep 28 2020	Sep	2020	Sep-2020	cigarette
8451937	plastic, wrapper	50.9316864610193/5.33129140735169	BE	Mon Sep 28 2020	Sep	2020	Sep-2020	plastic	wrapper
8451933	cigarette	50.9317359561575/5.33139970154067	BE	Mon Sep 28 2020	Sep	2020	Sep-2020	cigarette
8451931	piece	50.9316983214122/5.33142719418307	BE	Mon Sep 28 2020	Sep	2020	Sep-2020	piece
8451930	bottlecap	50.9316112334383/5.33146239817639	BE	Mon Sep 28 2020	Sep	2020	Sep-2020	bottlecap
8451929	wrapper	50.9316723794219/5.33141755499442	BE	Mon Sep 28 2020	Sep	2020	Sep-2020	wrapper
8451928	cigarette	50.9319100901959/5.33131789416571	BE	Mon Sep 28 2020	Sep	2020	Sep-2020	cigarette
8451927	paper	50.93197119427/5.33137170598407	BE	Mon Sep 28 2020	Sep	2020	Sep-2020	paper
8451926	plastic	50.9321847232533/5.33176464960476	BE	Mon Sep 28 2020	Sep	2020	Sep-2020	plastic
8451435	cigarettepack	50.846938/4.7389978	BE	Mon Sep 28 2020	Sep	2020	Sep-2020	cigarettepack
8451434	beer, can, metal	50.846938/4.7389978	BE	Mon Sep 28 2020	Sep	2020	Sep-2020	beer	can	metal
8451433	paper	50.846938/4.7389978	BE	Mon Sep 28 2020	Sep	2020	Sep-2020	paper
8451432	paper	50.846938/4.7389978	BE	Mon Sep 28 2020	Sep	2020	Sep-2020	paper
8451431	plastic	50.846938/4.7389978	BE	Mon Sep 28 2020	Sep	2020	Sep-2020	plastic
8451430	plastic	50.846938/4.7389978	BE	Mon Sep 28 2020	Sep	2020	Sep-2020	plastic
8451429	beer can, metal, stellaartois	50.846938/4.7389978	BE	Mon Sep 28 2020	Sep	2020	Sep-2020	beer can	metal	stellaartois
8451428	metal, can, drink	50.846938/4.7389978	BE	Mon Sep 28 2020	Sep	2020	Sep-2020	metal	can	drink
8451427	can, metal, beer, jupiler	50.846938/4.7389978	BE	Mon Sep 28 2020	Sep	2020	Sep-2020	can	metal	beer	jupiler
8451426	plastic	50.846938/4.7389978	BE	Mon Sep 28 2020	Sep	2020	Sep-2020	plastic
8451424	plastic	50.846938/4.7389978	BE	Mon Sep 28 2020	Sep	2020	Sep-2020	plastic
8451423	plastic, bottle, spa, water	50.846938/4.7389978	BE	Mon Sep 28 2020	Sep	2020	Sep-2020	plastic	bottle	spa	water
8451422	paper	50.846938/4.7389978	BE	Mon Sep 28 2020	Sep	2020	Sep-2020	paper
8451420	plastic, tube, electric wire	50.846938/4.7389978	BE	Mon Sep 28 2020	Sep	2020	Sep-2020	plastic	tube	electric wire
8451419	bottle, glass, wine	50.846938/4.7389978	BE	Mon Sep 28 2020	Sep	2020	Sep-2020	bottle	glass	wine
8451418	multiplex, wood	50.846938/4.7389978	BE	Mon Sep 28 2020	Sep	2020	Sep-2020	multiplex	wood
8451417	drink, caprisun	50.846938/4.7389978	BE	Mon Sep 28 2020	Sep	2020	Sep-2020	drink	caprisun
8451416	power, plug	50.846938/4.7389978	BE	Mon Sep 28 2020	Sep	2020	Sep-2020	power	plug
8451415	cardboard	50.846938/4.7389978	BE	Mon Sep 28 2020	Sep	2020	Sep-2020	cardboard
8451414	plastic	50.846938/4.7389978	BE	Mon Sep 28 2020	Sep	2020	Sep-2020	plastic
8451413	plastic, cap	50.846938/4.7389978	BE	Mon Sep 28 2020	Sep	2020	Sep-2020	plastic	cap
8451412	plastic, bag	50.846938/4.7389978	BE	Mon Sep 28 2020	Sep	2020	Sep-2020	plastic	bag
8451411	plastic	50.846938/4.7389978	BE	Mon Sep 28 2020	Sep	2020	Sep-2020	plastic
8451410	plastic	50.846938/4.7389978	BE	Mon Sep 28 2020	Sep	2020	Sep-2020	plastic
8451409	drugs, packaging, pills	50.846938/4.7389978	BE	Mon Sep 28 2020	Sep	2020	Sep-2020	drugs	packaging	pills
8451408	cup, plastic	50.846938/4.7389978	BE	Mon Sep 28 2020	Sep	2020	Sep-2020	cup	plastic
8451407	aluminum, foil	50.846938/4.7389978	BE	Mon Sep 28 2020	Sep	2020	Sep-2020	aluminum	foil
8451406	plastic	50.846938/4.7389978	BE	Mon Sep 28 2020	Sep	2020	Sep-2020	plastic
8451405	paper	50.846938/4.7389978	BE	Mon Sep 28 2020	Sep	2020	Sep-2020	paper
8451404	paper	50.846938/4.7389978	BE	Mon Sep 28 2020	Sep	2020	Sep-2020	paper
8451403	cardboard	50.846938/4.7389978	BE	Mon Sep 28 2020	Sep	2020	Sep-2020	cardboard
8451402	paper	50.846938/4.7389978	BE	Mon Sep 28 2020	Sep	2020	Sep-2020	paper
8451401	spraycan	50.846938/4.7389978	BE	Mon Sep 28 2020	Sep	2020	Sep-2020	spraycan
8451400	aluminum, foil	50.846938/4.7389978	BE	Mon Sep 28 2020	Sep	2020	Sep-2020	aluminum	foil
8451399	plastic	50.846938/4.7389978	BE	Mon Sep 28 2020	Sep	2020	Sep-2020	plastic
8451398	plastic	50.846938/4.7389978	BE	Mon Sep 28 2020	Sep	2020	Sep-2020	plastic
8451397	styrofoam	50.846938/4.7389978	BE	Mon Sep 28 2020	Sep	2020	Sep-2020	styrofoam
8451396	paper	50.846938/4.7389978	BE	Mon Sep 28 2020	Sep	2020	Sep-2020	paper
8451395	styrofoam	50.846938/4.7389978	BE	Mon Sep 28 2020	Sep	2020	Sep-2020	styrofoam
8451394	plastic	50.846938/4.7389978	BE	Mon Sep 28 2020	Sep	2020	Sep-2020	plastic
8451393	plastic	50.846938/4.7389978	BE	Mon Sep 28 2020	Sep	2020	Sep-2020	plastic
8451392	plastic	50.846938/4.7389978	BE	Mon Sep 28 2020	Sep	2020	Sep-2020	plastic
8451391	plastic, tube	50.846938/4.7389978	BE	Mon Sep 28 2020	Sep	2020	Sep-2020	plastic	tube
8451390	wood	50.846938/4.7389978	BE	Mon Sep 28 2020	Sep	2020	Sep-2020	wood
8451389	styrofoam	50.846938/4.7389978	BE	Mon Sep 28 2020	Sep	2020	Sep-2020	styrofoam
8451388	plastic, ribbon	50.846938/4.7389978	BE	Mon Sep 28 2020	Sep	2020	Sep-2020	plastic	ribbon
8451387	aluminum, foil	50.846938/4.7389978	BE	Mon Sep 28 2020	Sep	2020	Sep-2020	aluminum	foil
8451386	plastic	50.846938/4.7389978	BE	Mon Sep 28 2020	Sep	2020	Sep-2020	plastic
8451385	plastic	50.846938/4.7389978	BE	Mon Sep 28 2020	Sep	2020	Sep-2020	plastic
8451384	aluminum, foil	50.846938/4.7389978	BE	Mon Sep 28 2020	Sep	2020	Sep-2020	aluminum	foil
8451382	wrapper	50.846938/4.7389978	BE	Mon Sep 28 2020	Sep	2020	Sep-2020	wrapper
8451381	ballpoint	50.846938/4.7389978	BE	Mon Sep 28 2020	Sep	2020	Sep-2020	ballpoint
8451378	plastic	50.846938/4.7389978	BE	Mon Sep 28 2020	Sep	2020	Sep-2020	plastic
8451377	can, metal, nalu	50.846938/4.7389978	BE	Mon Sep 28 2020	Sep	2020	Sep-2020	can	metal	nalu
8451376	plastic	50.846938/4.7389978	BE	Mon Sep 28 2020	Sep	2020	Sep-2020	plastic
8451374	aluminum, foil	50.846938/4.7389978	BE	Mon Sep 28 2020	Sep	2020	Sep-2020	aluminum	foil
8451373	plastic	50.846938/4.7389978	BE	Mon Sep 28 2020	Sep	2020	Sep-2020	plastic
8451372	metal, can, beer, stella artois	50.846938/4.7389978	BE	Mon Sep 28 2020	Sep	2020	Sep-2020	metal	can	beer	stella artois
8451371	plastic, wrapper	50.846938/4.7389978	BE	Mon Sep 28 2020	Sep	2020	Sep-2020	plastic	wrapper
8451370	plastic	50.846938/4.7389978	BE	Mon Sep 28 2020	Sep	2020	Sep-2020	plastic
8451369	aluminum, foil	50.846938/4.7389978	BE	Mon Sep 28 2020	Sep	2020	Sep-2020	aluminum	foil
8451368	plastic, bottle, actemel	50.846938/4.7389978	BE	Mon Sep 28 2020	Sep	2020	Sep-2020	plastic	bottle	actemel
8451367	plastic	50.846938/4.7389978	BE	Mon Sep 28 2020	Sep	2020	Sep-2020	plastic
8451366	can, drink, metal, pepsimax	50.846938/4.7389978	BE	Mon Sep 28 2020	Sep	2020	Sep-2020	can	drink	metal	pepsimax
8451365	plastic	50.846938/4.7389978	BE	Mon Sep 28 2020	Sep	2020	Sep-2020	plastic
8451364	can, drink, metal, stella artois	50.846938/4.7389978	BE	Mon Sep 28 2020	Sep	2020	Sep-2020	can	drink	metal	stella artois
8451363	aluminum, foil	50.846938/4.7389978	BE	Mon Sep 28 2020	Sep	2020	Sep-2020	aluminum	foil
8451362	bag	50.846938/4.7389978	BE	Mon Sep 28 2020	Sep	2020	Sep-2020	bag
8451361	plastic, yoghurtpot	50.846938/4.7389978	BE	Mon Sep 28 2020	Sep	2020	Sep-2020	plastic	yoghurtpot
8451360	cup, plastic	50.846938/4.7389978	BE	Mon Sep 28 2020	Sep	2020	Sep-2020	cup	plastic
8451359	paper	50.846938/4.7389978	BE	Mon Sep 28 2020	Sep	2020	Sep-2020	paper
8451358	usb, internet, dongle, vodafone	50.846938/4.7389978	BE	Mon Sep 28 2020	Sep	2020	Sep-2020	usb	internet	dongle	vodafone
8451357	beer, bottle, glass	50.846938/4.7389978	BE	Mon Sep 28 2020	Sep	2020	Sep-2020	beer	bottle	glass
8451353	bottle, plastic, water	50.846938/4.7389978	BE	Mon Sep 28 2020	Sep	2020	Sep-2020	bottle	plastic	water
8451352	plastic, wrapper	50.846938/4.7389978	BE	Mon Sep 28 2020	Sep	2020	Sep-2020	plastic	wrapper
8451351	paper	50.846938/4.7389978	BE	Mon Sep 28 2020	Sep	2020	Sep-2020	paper
8451348	plastic	50.846938/4.7389978	BE	Mon Sep 28 2020	Sep	2020	Sep-2020	plastic
8451347	metal, can	50.846938/4.7389978	BE	Mon Sep 28 2020	Sep	2020	Sep-2020	metal	can
8451346	plastic	50.846938/4.7389978	BE	Mon Sep 28 2020	Sep	2020	Sep-2020	plastic
8451345	styrofoam	50.846938/4.7389978	BE	Mon Sep 28 2020	Sep	2020	Sep-2020	styrofoam
8451343	plastic	50.846938/4.7389978	BE	Mon Sep 28 2020	Sep	2020	Sep-2020	plastic
8440514	rope	51.1919925870894/2.82057982081382	BE	Mon Sep 28 2020	Sep	2020	Sep-2020	rope
8440484	bag, plastic, plasticbag	51.1923272993392/2.82207051147412	BE	Mon Sep 28 2020	Sep	2020	Sep-2020	bag	plastic	plasticbag
8439947	bottle, drink, plastic, plasticbottle, oasis	51.1925737534845/2.82485878587322	BE	Mon Sep 28 2020	Sep	2020	Sep-2020	bottle	drink	plastic	plasticbottle	oasis
8439946	plastic	51.1925646584006/2.82487387363456	BE	Mon Sep 28 2020	Sep	2020	Sep-2020	plastic
8439945	plastic	51.1925842614047/2.82488277110665	BE	Mon Sep 28 2020	Sep	2020	Sep-2020	plastic
8439944	plastic, shoe	51.1925474509764/2.8248891227483	BE	Mon Sep 28 2020	Sep	2020	Sep-2020	plastic	shoe
8439943	plastic, bag	51.1925790405027/2.8248428975521	BE	Mon Sep 28 2020	Sep	2020	Sep-2020	plastic	bag
8439942	bottle, plastic, drink	51.1925755387888/2.82483010155315	BE	Mon Sep 28 2020	Sep	2020	Sep-2020	bottle	plastic	drink
8439506	shoe, plastic	51.1928694679255/2.8239874800153	BE	Mon Sep 28 2020	Sep	2020	Sep-2020	shoe	plastic
8439505	bottle, drink, plastic, plasticbottle, water	51.1928495673712/2.82392477236288	BE	Mon Sep 28 2020	Sep	2020	Sep-2020	bottle	drink	plastic	plasticbottle	water
8439503	bottle, drink, plastic, plasticbottle, water, waterbottle	51.1928881482969/2.82398920141475	BE	Mon Sep 28 2020	Sep	2020	Sep-2020	bottle	drink	plastic	plasticbottle	water	waterbottle
8439502	plastic	51.1921404362745/2.82409217916068	BE	Mon Sep 28 2020	Sep	2020	Sep-2020	plastic
8439230	cup, plastic, plasticcup	51.1917897045928/2.82212991812381	BE	Mon Sep 28 2020	Sep	2020	Sep-2020	cup	plastic	plasticcup
8439127	plastic, shoe	51.191637312955/2.82152930268749	BE	Mon Sep 28 2020	Sep	2020	Sep-2020	plastic	shoe
8439124	plastic	51.1917089152531/2.82286336164467	BE	Mon Sep 28 2020	Sep	2020	Sep-2020	plastic
8439123	paper	51.1914602642272/2.82145644367279	BE	Mon Sep 28 2020	Sep	2020	Sep-2020	paper
8439118	plastic	51.1914316570334/2.82149478982562	BE	Mon Sep 28 2020	Sep	2020	Sep-2020	plastic
8438587	plastic	51.1915095290664/2.820762877832	BE	Mon Sep 28 2020	Sep	2020	Sep-2020	plastic
8438586	piece, plastic, stick	51.1914082188857/2.82072930420956	BE	Mon Sep 28 2020	Sep	2020	Sep-2020	piece	plastic	stick
8438585	piece	51.1908603455997/2.82083858451827	BE	Mon Sep 28 2020	Sep	2020	Sep-2020	piece
8438584	piece, plastic	51.1913820901744/2.82069139945615	BE	Mon Sep 28 2020	Sep	2020	Sep-2020	piece	plastic
8438583	can, aluminum	51.1914412710721/2.82074859650966	BE	Mon Sep 28 2020	Sep	2020	Sep-2020	can	aluminum
8438582	plastic	51.1913729118384/2.82074412835161	BE	Mon Sep 28 2020	Sep	2020	Sep-2020	plastic
8438540	piece, plastic, wrapper	51.1913319410772/2.82004784158527	BE	Mon Sep 28 2020	Sep	2020	Sep-2020	piece	plastic	wrapper
8438539	plastic, straw	51.1915588947988/2.8206059688396	BE	Mon Sep 28 2020	Sep	2020	Sep-2020	plastic	straw
8438538	plastic	51.1912412195382/2.81994462211938	BE	Mon Sep 28 2020	Sep	2020	Sep-2020	plastic
8438537	plastic, bag	51.1915243796493/2.82057222333356	BE	Mon Sep 28 2020	Sep	2020	Sep-2020	plastic	bag
8438536	plastic, wrapper	51.1914568070327/2.82046743351089	BE	Mon Sep 28 2020	Sep	2020	Sep-2020	plastic	wrapper
8438535	bottlecap, plastic	51.1912325590869/2.81991362273589	BE	Mon Sep 28 2020	Sep	2020	Sep-2020	bottlecap	plastic
8438534	plastic, rope, piece, wrapper	51.1912616758519/2.82002144063709	BE	Mon Sep 28 2020	Sep	2020	Sep-2020	plastic	rope	piece	wrapper
8438533	plastic	51.1914270975895/2.82046250757862	BE	Mon Sep 28 2020	Sep	2020	Sep-2020	plastic
8438532	cup, plastic, nescafǸ	51.1915122041326/2.82044613410276	BE	Mon Sep 28 2020	Sep	2020	Sep-2020	cup	plastic	nescafǸ
8438531	piece, plastic	51.1915032784569/2.82049873951782	BE	Mon Sep 28 2020	Sep	2020	Sep-2020	piece	plastic
8438529	piece, plastic	51.1914537006279/2.82044916308229	BE	Mon Sep 28 2020	Sep	2020	Sep-2020	piece	plastic
8438528	piece, plastic, wrapper	51.1914816601572/2.82050890659446	BE	Mon Sep 28 2020	Sep	2020	Sep-2020	piece	plastic	wrapper
8438527	plastic	51.1913694762229/2.82013931711565	BE	Mon Sep 28 2020	Sep	2020	Sep-2020	plastic
8438526	plastic	51.1913893201436/2.82016478839034	BE	Mon Sep 28 2020	Sep	2020	Sep-2020	plastic
8438525	bag, plastic	51.1913618709925/2.82015288973938	BE	Mon Sep 28 2020	Sep	2020	Sep-2020	bag	plastic
8438524	bottlecap, plastic	51.191368670784/2.82009996680422	BE	Mon Sep 28 2020	Sep	2020	Sep-2020	bottlecap	plastic
8438523	bag, piece, plastic	51.1913011303343/2.82002775021068	BE	Mon Sep 28 2020	Sep	2020	Sep-2020	bag	piece	plastic
8438522	bottlecap, plastic	51.1913578690131/2.82010641206738	BE	Mon Sep 28 2020	Sep	2020	Sep-2020	bottlecap	plastic
8438521	plastic	51.1911729918436/2.81995419538126	BE	Mon Sep 28 2020	Sep	2020	Sep-2020	plastic
8438414	plastic, wrapper	51.1911956420566/2.81980697916403	BE	Mon Sep 28 2020	Sep	2020	Sep-2020	plastic	wrapper
8438413	plastic	51.1911543970035/2.81978724685493	BE	Mon Sep 28 2020	Sep	2020	Sep-2020	plastic
8438412	plastic, rope	51.1910499662391/2.81980958324655	BE	Mon Sep 28 2020	Sep	2020	Sep-2020	plastic	rope
8438411	bottlecap, plastic	51.1911939601441/2.81979656668735	BE	Mon Sep 28 2020	Sep	2020	Sep-2020	bottlecap	plastic
8438410	plastic	51.1908618142138/2.81922410923741	BE	Mon Sep 28 2020	Sep	2020	Sep-2020	plastic
8438409	plastic, bag	51.1908027729475/2.81901138718906	BE	Mon Sep 28 2020	Sep	2020	Sep-2020	plastic	bag
8438408	plastic	51.1908753292103/2.81929260290148	BE	Mon Sep 28 2020	Sep	2020	Sep-2020	plastic
8438407	plastic	51.1911053091134/2.81973677804518	BE	Mon Sep 28 2020	Sep	2020	Sep-2020	plastic
8438406	plastic	51.1910683481072/2.81975557830544	BE	Mon Sep 28 2020	Sep	2020	Sep-2020	plastic
8438405	plastic	51.1911779453117/2.81972384538904	BE	Mon Sep 28 2020	Sep	2020	Sep-2020	plastic
8438404	plastic	51.1911345610296/2.81968596404595	BE	Mon Sep 28 2020	Sep	2020	Sep-2020	plastic
8438403	plastic	51.1911375870641/2.81973241018806	BE	Mon Sep 28 2020	Sep	2020	Sep-2020	plastic
8438402	plastic, rope	51.1911045139361/2.8196681189502	BE	Mon Sep 28 2020	Sep	2020	Sep-2020	plastic	rope
8438401	plastic	51.1911199001531/2.81970407077224	BE	Mon Sep 28 2020	Sep	2020	Sep-2020	plastic
8438400	bag, plastic, wrapper	51.1910179265446/2.81950570869082	BE	Mon Sep 28 2020	Sep	2020	Sep-2020	bag	plastic	wrapper
8438399	plastic	51.1910683989532/2.81961359536518	BE	Mon Sep 28 2020	Sep	2020	Sep-2020	plastic
8438398	plastic	51.1909744416863/2.8194605549296	BE	Mon Sep 28 2020	Sep	2020	Sep-2020	plastic
8438397	rope	51.1910754028595/2.81959878383694	BE	Mon Sep 28 2020	Sep	2020	Sep-2020	rope
8438396	plastic, straw	51.190941890843/2.81943560481985	BE	Mon Sep 28 2020	Sep	2020	Sep-2020	plastic	straw
8438395	plastic	51.1906311910783/2.81887811010273	BE	Mon Sep 28 2020	Sep	2020	Sep-2020	plastic
8438253	plastic	51.1892952561965/2.81728473441987	BE	Mon Sep 28 2020	Sep	2020	Sep-2020	plastic
8438252	plastic	51.1899194801952/2.81807931674276	BE	Mon Sep 28 2020	Sep	2020	Sep-2020	plastic
8438251	plastic, bag	51.1904802806708/2.8185376135644	BE	Mon Sep 28 2020	Sep	2020	Sep-2020	plastic	bag
8438250	plastic	51.1905957560877/2.81884069457937	BE	Mon Sep 28 2020	Sep	2020	Sep-2020	plastic
8438249	plastic	51.1900730742759/2.81785075678012	BE	Mon Sep 28 2020	Sep	2020	Sep-2020	plastic
8438248	plastic	51.1906799059053/2.81884670732511	BE	Mon Sep 28 2020	Sep	2020	Sep-2020	plastic
8438247	plastic, wrapper	51.1904788096039/2.8185870135654	BE	Mon Sep 28 2020	Sep	2020	Sep-2020	plastic	wrapper
8438246	bottlecap, plastic	51.1905767641961/2.81874207330466	BE	Mon Sep 28 2020	Sep	2020	Sep-2020	bottlecap	plastic
8438245	plastic, rope	51.1904264078779/2.81848531033304	BE	Mon Sep 28 2020	Sep	2020	Sep-2020	plastic	rope
8438244	plastic	51.1904771525338/2.81845072236931	BE	Mon Sep 28 2020	Sep	2020	Sep-2020	plastic
8438243	plastic	51.1904678295224/2.81848456946468	BE	Mon Sep 28 2020	Sep	2020	Sep-2020	plastic
8438242	plastic	51.1901201297634/2.81771841025676	BE	Mon Sep 28 2020	Sep	2020	Sep-2020	plastic
8438241	plastic, wrapper	51.1902655700548/2.81815238771867	BE	Mon Sep 28 2020	Sep	2020	Sep-2020	plastic	wrapper
8438240	plastic	51.1901119905332/2.81778116891807	BE	Mon Sep 28 2020	Sep	2020	Sep-2020	plastic
8438239	plastic	51.1904547707078/2.81835618632573	BE	Mon Sep 28 2020	Sep	2020	Sep-2020	plastic
8438238	plastic	51.1904712034863/2.81822215287554	BE	Mon Sep 28 2020	Sep	2020	Sep-2020	plastic
8438237	plastic	51.1900800405167/2.81785946752421	BE	Mon Sep 28 2020	Sep	2020	Sep-2020	plastic
8438236	plastic	51.1897086302528/2.81776506611361	BE	Mon Sep 28 2020	Sep	2020	Sep-2020	plastic
8438235	plastic	51.1901817833604/2.8180054967584	BE	Mon Sep 28 2020	Sep	2020	Sep-2020	plastic
8438234	plastic, rope	51.1902312721245/2.81802909938204	BE	Mon Sep 28 2020	Sep	2020	Sep-2020	plastic	rope
8438233	plastic, bag	51.1902451450818/2.8180294331845	BE	Mon Sep 28 2020	Sep	2020	Sep-2020	plastic	bag
8438232	plastic, strap	51.1902379392565/2.81805000347149	BE	Mon Sep 28 2020	Sep	2020	Sep-2020	plastic	strap
8438231	plastic, rope	51.1902903611109/2.81799752081575	BE	Mon Sep 28 2020	Sep	2020	Sep-2020	plastic	rope
8438230	plastic	51.1897624004635/2.81770846298785	BE	Mon Sep 28 2020	Sep	2020	Sep-2020	plastic
8437996	plastic	51.1902142851758/2.81759911515433	BE	Mon Sep 28 2020	Sep	2020	Sep-2020	plastic
8437991	plastic	51.1900197204652/2.8174730925101	BE	Mon Sep 28 2020	Sep	2020	Sep-2020	plastic
8437987	plastic, rope	51.1900432575637/2.81740617678377	BE	Mon Sep 28 2020	Sep	2020	Sep-2020	plastic	rope
8437986	plastic	51.1900818150714/2.81731964176821	BE	Mon Sep 28 2020	Sep	2020	Sep-2020	plastic
8437985	plastic	51.1899866249406/2.81847347801826	BE	Mon Sep 28 2020	Sep	2020	Sep-2020	plastic
8437982	polystyrene	51.1898712824311/2.8171404506751	BE	Mon Sep 28 2020	Sep	2020	Sep-2020	polystyrene
8437981	plastic	51.1899698283119/2.81711790440165	BE	Mon Sep 28 2020	Sep	2020	Sep-2020	plastic
8437980	plastic	51.1898241761945/2.81712244438851	BE	Mon Sep 28 2020	Sep	2020	Sep-2020	plastic
8437979	plastic	51.1898770982525/2.81717543542887	BE	Mon Sep 28 2020	Sep	2020	Sep-2020	plastic
8437978	plastic	51.1900110787447/2.81726437855269	BE	Mon Sep 28 2020	Sep	2020	Sep-2020	plastic
8437977	plastic	51.1899480668647/2.81721348314092	BE	Mon Sep 28 2020	Sep	2020	Sep-2020	plastic
8437976	plastic	51.1899895023823/2.81726377856235	BE	Mon Sep 28 2020	Sep	2020	Sep-2020	plastic
8437975	plastic	51.1899247267234/2.81710985455394	BE	Mon Sep 28 2020	Sep	2020	Sep-2020	plastic
8437974	plastic	51.1899615595417/2.81715132853019	BE	Mon Sep 28 2020	Sep	2020	Sep-2020	plastic
8437973	plastic	51.1899873467757/2.81715757327793	BE	Mon Sep 28 2020	Sep	2020	Sep-2020	plastic
8437972	plastic	51.1899794311006/2.8171324627508	BE	Mon Sep 28 2020	Sep	2020	Sep-2020	plastic
8437971	plastic	51.1899348217728/2.81711193605662	BE	Mon Sep 28 2020	Sep	2020	Sep-2020	plastic
8437970	plastic	51.1896333641052/2.81708626089996	BE	Mon Sep 28 2020	Sep	2020	Sep-2020	plastic
8437969	plastic	51.1898770982525/2.81717543542887	BE	Mon Sep 28 2020	Sep	2020	Sep-2020	plastic
8437968	plastic	51.1899385362689/2.8171507241598	BE	Mon Sep 28 2020	Sep	2020	Sep-2020	plastic
8437911	plastic	51.1896011131911/2.81654162987872	BE	Mon Sep 28 2020	Sep	2020	Sep-2020	plastic
8437910	plastic	51.1897632540521/2.81704320666071	BE	Mon Sep 28 2020	Sep	2020	Sep-2020	plastic
8437909	plastic	51.1897595765254/2.81702201924833	BE	Mon Sep 28 2020	Sep	2020	Sep-2020	plastic
8437908	glass	51.1896853771132/2.81692596292138	BE	Mon Sep 28 2020	Sep	2020	Sep-2020	glass
8437907	plastic	51.1895446670327/2.8166040099482	BE	Mon Sep 28 2020	Sep	2020	Sep-2020	plastic
8437906	plastic, bag, wrapper	51.1896408193015/2.81660958328986	BE	Mon Sep 28 2020	Sep	2020	Sep-2020	plastic	bag	wrapper
8437905	plastic	51.1896744164133/2.81692840953958	BE	Mon Sep 28 2020	Sep	2020	Sep-2020	plastic
8437904	plastic	51.1896767597511/2.8165117404138	BE	Mon Sep 28 2020	Sep	2020	Sep-2020	plastic
8437903	plastic	51.1896983636332/2.81649003866723	BE	Mon Sep 28 2020	Sep	2020	Sep-2020	plastic
8437902	plastic	51.189658755187/2.81659719864182	BE	Mon Sep 28 2020	Sep	2020	Sep-2020	plastic
8437901	plastic	51.1897299638697/2.8168679050232	BE	Mon Sep 28 2020	Sep	2020	Sep-2020	plastic
8437900	plastic	51.1897174571824/2.81684944060838	BE	Mon Sep 28 2020	Sep	2020	Sep-2020	plastic
8437899	plastic, rope	51.1897514329478/2.81685390928814	BE	Mon Sep 28 2020	Sep	2020	Sep-2020	plastic	rope
8437898	plastic	51.1891565072847/2.81656818023858	BE	Mon Sep 28 2020	Sep	2020	Sep-2020	plastic
8437897	plastic	51.1897052756154/2.81688108122585	BE	Mon Sep 28 2020	Sep	2020	Sep-2020	plastic
8437896	plastic, bag	51.1897744439353/2.81669485374318	BE	Mon Sep 28 2020	Sep	2020	Sep-2020	plastic	bag
8437895	plastic	51.1896992577851/2.81689966710617	BE	Mon Sep 28 2020	Sep	2020	Sep-2020	plastic
8437894	plastic	51.1897401423701/2.81700049852367	BE	Mon Sep 28 2020	Sep	2020	Sep-2020	plastic
8437893	plastic, piece	51.1895030443052/2.81739900787848	BE	Mon Sep 28 2020	Sep	2020	Sep-2020	plastic	piece
8437892	rope, plastic	51.1896564080661/2.81654331651558	BE	Mon Sep 28 2020	Sep	2020	Sep-2020	rope	plastic
8428733	screw, metal	50.4969143/3.6575712	BE	Mon Sep 28 2020	Sep	2020	Sep-2020	screw	metal
8428732	glass	50.4968448/3.6576519	BE	Mon Sep 28 2020	Sep	2020	Sep-2020	glass
8428731	cigarette	50.4969006/3.6575736	BE	Mon Sep 28 2020	Sep	2020	Sep-2020	cigarette
8428730	metal	50.4967729/3.6576844	BE	Mon Sep 28 2020	Sep	2020	Sep-2020	metal
8428729	plastic	50.4967728/3.6576576	BE	Mon Sep 28 2020	Sep	2020	Sep-2020	plastic
8428728	metal	50.4967465/3.65764	BE	Mon Sep 28 2020	Sep	2020	Sep-2020	metal
8428727	cigarette, butt	50.4967446/3.6576705	BE	Mon Sep 28 2020	Sep	2020	Sep-2020	cigarette	butt
8428726	cigarette, butt	50.4967719/3.6576839	BE	Mon Sep 28 2020	Sep	2020	Sep-2020	cigarette	butt
8428725	plastic	50.4967783/3.6576834	BE	Mon Sep 28 2020	Sep	2020	Sep-2020	plastic
8428724	plastic	50.4967931/3.6576793	BE	Mon Sep 28 2020	Sep	2020	Sep-2020	plastic
8428723	bottlecap	50.496756/3.6576089	BE	Mon Sep 28 2020	Sep	2020	Sep-2020	bottlecap
8428722	plastic	50.4967962/3.657632	BE	Mon Sep 28 2020	Sep	2020	Sep-2020	plastic
8428721	plastic	50.4967945/3.6576584	BE	Mon Sep 28 2020	Sep	2020	Sep-2020	plastic
8428720	plastic	50.4967547/3.6576145	BE	Mon Sep 28 2020	Sep	2020	Sep-2020	plastic
8428719	paper, piece	50.4967645/3.6577587	BE	Mon Sep 28 2020	Sep	2020	Sep-2020	paper	piece
8428718	wrapper	50.4967645/3.6577587	BE	Mon Sep 28 2020	Sep	2020	Sep-2020	wrapper
8428717	cigarette, butt	50.4967783/3.6576788	BE	Mon Sep 28 2020	Sep	2020	Sep-2020	cigarette	butt
8428716	aluminium	50.4966975/3.6579082	BE	Mon Sep 28 2020	Sep	2020	Sep-2020	aluminium
8427208	plastic	51.1905124513481/2.81993012972315	BE	Mon Sep 28 2020	Sep	2020	Sep-2020	plastic
8427205	plastic	51.1906228253627/2.81995625646086	BE	Mon Sep 28 2020	Sep	2020	Sep-2020	plastic
8427203	plastic	51.1906401749263/2.8198707018051	BE	Mon Sep 28 2020	Sep	2020	Sep-2020	plastic
8427202	plastic	51.1906726618125/2.81996975609	BE	Mon Sep 28 2020	Sep	2020	Sep-2020	plastic
8427201	plastic	51.190701887955/2.81998443230395	BE	Mon Sep 28 2020	Sep	2020	Sep-2020	plastic
8427200	plastic	51.1906791717756/2.81994463073915	BE	Mon Sep 28 2020	Sep	2020	Sep-2020	plastic
8427032	plastic	51.1905343834296/2.82000852717654	BE	Mon Sep 28 2020	Sep	2020	Sep-2020	plastic
8427031	plastic	51.1908024103038/2.82013196385377	BE	Mon Sep 28 2020	Sep	2020	Sep-2020	plastic
8427030	plastic	51.1907830971584/2.82007609281162	BE	Mon Sep 28 2020	Sep	2020	Sep-2020	plastic
8427029	plastic	51.1905490986669/2.81994999502526	BE	Mon Sep 28 2020	Sep	2020	Sep-2020	plastic
8426914	plastic	51.1908798117928/2.82020771575081	BE	Mon Sep 28 2020	Sep	2020	Sep-2020	plastic
8426899	plastic, stick	51.1908506350375/2.82035130638375	BE	Mon Sep 28 2020	Sep	2020	Sep-2020	plastic	stick
8426898	plastic	51.1908865239083/2.82026177657522	BE	Mon Sep 28 2020	Sep	2020	Sep-2020	plastic
8426897	plastic	51.1908441865051/2.82021523763707	BE	Mon Sep 28 2020	Sep	2020	Sep-2020	plastic
8426895	plastic, bottlecap	51.1909164346913/2.82039774032238	BE	Mon Sep 28 2020	Sep	2020	Sep-2020	plastic	bottlecap
8426893	plastic, piece	51.1909347217998/2.82043255159161	BE	Mon Sep 28 2020	Sep	2020	Sep-2020	plastic	piece
8426892	plastic	51.1909116810341/2.82034181963625	BE	Mon Sep 28 2020	Sep	2020	Sep-2020	plastic
8426749	plastic, bottlecap	51.1909384412636/2.8200715412632	BE	Mon Sep 28 2020	Sep	2020	Sep-2020	plastic	bottlecap
8426742	straw, plastic	51.1909879192483/2.82014288159636	BE	Mon Sep 28 2020	Sep	2020	Sep-2020	straw	plastic
8426741	plastic, stick	51.1908696680478/2.82032858029607	BE	Mon Sep 28 2020	Sep	2020	Sep-2020	plastic	stick
8426740	plastic	51.1909044276716/2.820363524578	BE	Mon Sep 28 2020	Sep	2020	Sep-2020	plastic
8426739	plastic	51.1908913239499/2.82033131792875	BE	Mon Sep 28 2020	Sep	2020	Sep-2020	plastic
8426738	plastic	51.1908588182067/2.82028677425976	BE	Mon Sep 28 2020	Sep	2020	Sep-2020	plastic
8426737	plastic	51.1909107416732/2.82034587689197	BE	Mon Sep 28 2020	Sep	2020	Sep-2020	plastic
8426736	plastic, stick	51.1909288857425/2.82035323261494	BE	Mon Sep 28 2020	Sep	2020	Sep-2020	plastic	stick
8426735	plastic	51.1908895565267/2.82035295509044	BE	Mon Sep 28 2020	Sep	2020	Sep-2020	plastic
8426734	plastic	51.1909271695564/2.82032641757149	BE	Mon Sep 28 2020	Sep	2020	Sep-2020	plastic
8426732	plastic	51.1909270874319/2.82032801671006	BE	Mon Sep 28 2020	Sep	2020	Sep-2020	plastic
8426731	plastic	51.1909089023184/2.82037676907212	BE	Mon Sep 28 2020	Sep	2020	Sep-2020	plastic
8426730	plastic	51.1908945610519/2.82037161174265	BE	Mon Sep 28 2020	Sep	2020	Sep-2020	plastic
8426729	plastic	51.1908910209302/2.82034674575934	BE	Mon Sep 28 2020	Sep	2020	Sep-2020	plastic
8426728	plastic, bottlecap	51.190908079385/2.82036860051816	BE	Mon Sep 28 2020	Sep	2020	Sep-2020	plastic	bottlecap
8426727	plastic	51.1904516051183/2.81995909526862	BE	Mon Sep 28 2020	Sep	2020	Sep-2020	plastic
8426584	plastic	51.1909999060787/2.82127874727638	BE	Mon Sep 28 2020	Sep	2020	Sep-2020	plastic
8426574	can	51.1909359325514/2.82055353522582	BE	Mon Sep 28 2020	Sep	2020	Sep-2020	can
8426573	plastic	51.1909154850177/2.82057401728205	BE	Mon Sep 28 2020	Sep	2020	Sep-2020	plastic
8426570	plastic, stick	51.1909643496934/2.8206404018007	BE	Mon Sep 28 2020	Sep	2020	Sep-2020	plastic	stick
8426569	plastic	51.1909442966132/2.82065681589216	BE	Mon Sep 28 2020	Sep	2020	Sep-2020	plastic
8426568	plastic	51.1909422552762/2.82063686361073	BE	Mon Sep 28 2020	Sep	2020	Sep-2020	plastic
8426567	plastic	51.1909352944742/2.82049864417041	BE	Mon Sep 28 2020	Sep	2020	Sep-2020	plastic
8426566	plastic	51.1908997742384/2.82059883797906	BE	Mon Sep 28 2020	Sep	2020	Sep-2020	plastic
8426565	bottle, glass	51.1908769776973/2.82050487130594	BE	Mon Sep 28 2020	Sep	2020	Sep-2020	bottle	glass
8426564	can	51.1908711924063/2.82047136294699	BE	Mon Sep 28 2020	Sep	2020	Sep-2020	can
8426563	drink, can	51.1909377987792/2.82050961419213	BE	Mon Sep 28 2020	Sep	2020	Sep-2020	drink	can
8426562	bottle, glass, drink	51.190984783033/2.82064087229183	BE	Mon Sep 28 2020	Sep	2020	Sep-2020	bottle	glass	drink
8426561	can	51.1909594141527/2.82062632836242	BE	Mon Sep 28 2020	Sep	2020	Sep-2020	can
8426422	plastic	51.1912116533078/2.82077922555156	BE	Mon Sep 28 2020	Sep	2020	Sep-2020	plastic
8426421	plastic	51.1912267142276/2.82080793120106	BE	Mon Sep 28 2020	Sep	2020	Sep-2020	plastic
8426418	plastic, stick	51.1907505817951/2.8199949147464	BE	Mon Sep 28 2020	Sep	2020	Sep-2020	plastic	stick
8426417	plastic	51.1910102258161/2.82117439434483	BE	Mon Sep 28 2020	Sep	2020	Sep-2020	plastic
8426416	piece, plastic, stick	51.1907345311733/2.81969995591358	BE	Mon Sep 28 2020	Sep	2020	Sep-2020	piece	plastic	stick
8426415	piece, plastic	51.1907020851859/2.81989257237497	BE	Mon Sep 28 2020	Sep	2020	Sep-2020	piece	plastic
8426414	plastic	51.1910656552369/2.82080783586798	BE	Mon Sep 28 2020	Sep	2020	Sep-2020	plastic
8426413	plastic	51.1910070382541/2.82081569105796	BE	Mon Sep 28 2020	Sep	2020	Sep-2020	plastic
8426412	plastic, stylo	51.1909634299081/2.82083007369474	BE	Mon Sep 28 2020	Sep	2020	Sep-2020	plastic	stylo
8426411	plastic	51.1909879101288/2.82084502791545	BE	Mon Sep 28 2020	Sep	2020	Sep-2020	plastic
8426410	plastic	51.1907670259505/2.82069488960274	BE	Mon Sep 28 2020	Sep	2020	Sep-2020	plastic
8426409	plastic	51.190113791382/2.81915736855108	BE	Mon Sep 28 2020	Sep	2020	Sep-2020	plastic
8426408	plastic	51.1908540001067/2.82008661514656	BE	Mon Sep 28 2020	Sep	2020	Sep-2020	plastic
8426407	piece, plastic	51.1903119942588/2.81947552015335	BE	Mon Sep 28 2020	Sep	2020	Sep-2020	piece	plastic
8426406	piece, plastic	51.1900321709392/2.81897100664195	BE	Mon Sep 28 2020	Sep	2020	Sep-2020	piece	plastic
8425937	bottlecap, plastic	51.1901951994414/2.81929020454679	BE	Mon Sep 28 2020	Sep	2020	Sep-2020	bottlecap	plastic
8425935	plastic	51.1909394566804/2.81975628192851	BE	Mon Sep 28 2020	Sep	2020	Sep-2020	plastic
8425934	plastic	51.1908944969851/2.81963448650978	BE	Mon Sep 28 2020	Sep	2020	Sep-2020	plastic
8425933	plastic	51.1909223460616/2.81961244612332	BE	Mon Sep 28 2020	Sep	2020	Sep-2020	plastic
8425932	plastic, straw	51.1911652527386/2.82141275724634	BE	Mon Sep 28 2020	Sep	2020	Sep-2020	plastic	straw
8425928	plastic	51.1906793496758/2.82012467958349	BE	Mon Sep 28 2020	Sep	2020	Sep-2020	plastic
8425924	plastic	51.1907731241771/2.81942275099246	BE	Mon Sep 28 2020	Sep	2020	Sep-2020	plastic
8425923	piece, plastic, wrapper	51.1900163382936/2.81876160408587	BE	Mon Sep 28 2020	Sep	2020	Sep-2020	piece	plastic	wrapper
8425916	plastic, bottlecap	51.1896224569852/2.81761012044605	BE	Mon Sep 28 2020	Sep	2020	Sep-2020	plastic	bottlecap
8425899	plastic, wrapper	51.1899397787853/2.81852583855939	BE	Mon Sep 28 2020	Sep	2020	Sep-2020	plastic	wrapper
8425895	plastic, wrapper	51.1902086261672/2.81842541199892	BE	Mon Sep 28 2020	Sep	2020	Sep-2020	plastic	wrapper
8425628	plastic	51.1899943497994/2.81846711012367	BE	Mon Sep 28 2020	Sep	2020	Sep-2020	plastic
8425627	metal	51.1901821748159/2.81878992061423	BE	Mon Sep 28 2020	Sep	2020	Sep-2020	metal
8425626	plastic, piece	51.1902509082973/2.81880495505177	BE	Mon Sep 28 2020	Sep	2020	Sep-2020	plastic	piece
8425625	cup, plastic	51.1902566744133/2.81882681994359	BE	Mon Sep 28 2020	Sep	2020	Sep-2020	cup	plastic
8425430	plastic	50.8452776/4.7381401	BE	Mon Sep 28 2020	Sep	2020	Sep-2020	plastic
8425428	plastic	50.8454665/4.7387764	BE	Mon Sep 28 2020	Sep	2020	Sep-2020	plastic
8425423	plastic	50.8454665/4.7387764	BE	Mon Sep 28 2020	Sep	2020	Sep-2020	plastic
8425421	wrapper	50.8434179/4.7386903	BE	Mon Sep 28 2020	Sep	2020	Sep-2020	wrapper
8424909	plastic	50.8434179/4.7386903	BE	Mon Sep 28 2020	Sep	2020	Sep-2020	plastic
8424870	can	50.8434324/4.7386804	BE	Mon Sep 28 2020	Sep	2020	Sep-2020	can
8424727	styrofoam	50.843435/4.7386775	BE	Mon Sep 28 2020	Sep	2020	Sep-2020	styrofoam
8424726	plastic	50.8434359/4.7386912	BE	Mon Sep 28 2020	Sep	2020	Sep-2020	plastic
8424725	can	50.8434943/4.738827	BE	Mon Sep 28 2020	Sep	2020	Sep-2020	can
8424724	wrapper	50.8433658/4.7390126	BE	Mon Sep 28 2020	Sep	2020	Sep-2020	wrapper
8424723	bottle	50.8433669/4.7390097	BE	Mon Sep 28 2020	Sep	2020	Sep-2020	bottle
8424722	can	50.8433657/4.7390133	BE	Mon Sep 28 2020	Sep	2020	Sep-2020	can
8424721	plastic	50.8433658/4.7390135	BE	Mon Sep 28 2020	Sep	2020	Sep-2020	plastic
8424720	wrapper	50.843361/4.7389933	BE	Mon Sep 28 2020	Sep	2020	Sep-2020	wrapper
8424719	wrapper	50.8433738/4.7389943	BE	Mon Sep 28 2020	Sep	2020	Sep-2020	wrapper
8424717	plastic	50.843369/4.7392063	BE	Mon Sep 28 2020	Sep	2020	Sep-2020	plastic
8424680	can	50.8433809/4.7391521	BE	Mon Sep 28 2020	Sep	2020	Sep-2020	can
8424668	piece	50.8433822/4.739156	BE	Mon Sep 28 2020	Sep	2020	Sep-2020	piece
8424662	plastic	50.8434005/4.7391692	BE	Mon Sep 28 2020	Sep	2020	Sep-2020	plastic
8424646	plastic	50.8435024/4.7391061	BE	Mon Sep 28 2020	Sep	2020	Sep-2020	plastic
8424630	plastic	50.8433818/4.7392534	BE	Mon Sep 28 2020	Sep	2020	Sep-2020	plastic
8424623	plastic	50.8433813/4.7392531	BE	Mon Sep 28 2020	Sep	2020	Sep-2020	plastic
8424622	wrapper	50.8433791/4.7392499	BE	Mon Sep 28 2020	Sep	2020	Sep-2020	wrapper
8424621	can	50.8433836/4.7392613	BE	Mon Sep 28 2020	Sep	2020	Sep-2020	can
8424620	metal	50.8433698/4.7394454	BE	Mon Sep 28 2020	Sep	2020	Sep-2020	metal
8424619	wrapper	50.8433328/4.7395069	BE	Mon Sep 28 2020	Sep	2020	Sep-2020	wrapper
8424591	wrapper	50.843328/4.7395631	BE	Mon Sep 28 2020	Sep	2020	Sep-2020	wrapper
8424590	plastic	50.8433504/4.7396302	BE	Mon Sep 28 2020	Sep	2020	Sep-2020	plastic
8424589	plastic, piece	50.8434413/4.739692	BE	Mon Sep 28 2020	Sep	2020	Sep-2020	plastic	piece
8424588	plastic	50.8433094/4.739598	BE	Mon Sep 28 2020	Sep	2020	Sep-2020	plastic
8424585	wrapper	50.8433393/4.7396884	BE	Mon Sep 28 2020	Sep	2020	Sep-2020	wrapper
8424583	plastic	50.8447284/4.7384062	BE	Mon Sep 28 2020	Sep	2020	Sep-2020	plastic
8424582	piece, plastic	50.8433101/4.7398232	BE	Mon Sep 28 2020	Sep	2020	Sep-2020	piece	plastic
8424574	plastic	50.8433521/4.7396151	BE	Mon Sep 28 2020	Sep	2020	Sep-2020	plastic
8424521	plastic	50.8433545/4.7396504	BE	Mon Sep 28 2020	Sep	2020	Sep-2020	plastic
8424487	can	50.8433085/4.7397552	BE	Mon Sep 28 2020	Sep	2020	Sep-2020	can
8424439	wrapper	50.8433042/4.7397812	BE	Mon Sep 28 2020	Sep	2020	Sep-2020	wrapper
8424401	plastic	50.8433595/4.7396882	BE	Mon Sep 28 2020	Sep	2020	Sep-2020	plastic
8424390	wrapper	50.8433002/4.7398205	BE	Mon Sep 28 2020	Sep	2020	Sep-2020	wrapper
8424368	aluminum	50.8431214/4.7403231	BE	Mon Sep 28 2020	Sep	2020	Sep-2020	aluminum
8393291	plastic	50.8109073136014/5.67173170061467	BE	Sun Sep 27 2020	Sep	2020	Sep-2020	plastic
8393218	bottle, plasticbottle	50.810137866361/5.67084319157994	BE	Sun Sep 27 2020	Sep	2020	Sep-2020	bottle	plasticbottle
8393217	bottlecap	50.8106012590472/5.67154334367261	BE	Sun Sep 27 2020	Sep	2020	Sep-2020	bottlecap
8393216	paper, wrapper	50.8113799873487/5.67042187016046	BE	Sun Sep 27 2020	Sep	2020	Sep-2020	paper	wrapper
8393215	cigarette	50.8108497187422/5.67164713750163	BE	Sun Sep 27 2020	Sep	2020	Sep-2020	cigarette
8393212	plastic	50.8108056629299/5.67159172881175	BE	Sun Sep 27 2020	Sep	2020	Sep-2020	plastic
8393211	bottle, plastic	50.7956614965933/5.67981023617713	BE	Sun Sep 27 2020	Sep	2020	Sep-2020	bottle	plastic
8393209	plastic, wrapper	50.8027709101078/5.67481613303213	BE	Sun Sep 27 2020	Sep	2020	Sep-2020	plastic	wrapper
8393207	plastic	50.8106522844711/5.67176709999408	BE	Sun Sep 27 2020	Sep	2020	Sep-2020	plastic
8393206	plastic, wrapper	50.811061812354/5.67192996783652	BE	Sun Sep 27 2020	Sep	2020	Sep-2020	plastic	wrapper
8393204	can	50.811061812354/5.67192996783652	BE	Sun Sep 27 2020	Sep	2020	Sep-2020	can
8385944	plastic, bag	51.1072400767777/3.98620499744085	BE	Sun Sep 27 2020	Sep	2020	Sep-2020	plastic	bag
8385943	sigarettenpeuk	51.1072133353512/3.9861731204607	BE	Sun Sep 27 2020	Sep	2020	Sep-2020	sigarettenpeuk
8385942	paper	51.107132230285/3.98628709515288	BE	Sun Sep 27 2020	Sep	2020	Sep-2020	paper
8385941	kledij, katoen	51.1071847268931/3.98624764578414	BE	Sun Sep 27 2020	Sep	2020	Sep-2020	kledij	katoen
8385940	bottle, plastic, spa	51.1071387453845/3.9862686996119	BE	Sun Sep 27 2020	Sep	2020	Sep-2020	bottle	plastic	spa
8385939	sigarettenpeuk	51.1072004846553/3.9863217682758	BE	Sun Sep 27 2020	Sep	2020	Sep-2020	sigarettenpeuk
8385938	sigarettenpeuk	51.1072297354822/3.98616154046313	BE	Sun Sep 27 2020	Sep	2020	Sep-2020	sigarettenpeuk
8385937	ticket, nmbs	51.1071221454894/3.98661110441337	BE	Sun Sep 27 2020	Sep	2020	Sep-2020	ticket	nmbs
8385936	sigarettenpeuk	51.1072214378632/3.98651945279987	BE	Sun Sep 27 2020	Sep	2020	Sep-2020	sigarettenpeuk
8385934	sigarettenpeuk	51.1072214378632/3.98651945279987	BE	Sun Sep 27 2020	Sep	2020	Sep-2020	sigarettenpeuk
8385931	aluminumfoil	51.1072081376653/3.98617238429254	BE	Sun Sep 27 2020	Sep	2020	Sep-2020	aluminumfoil
8385929	paper, ticket	51.1071804662391/3.98621946071016	BE	Sun Sep 27 2020	Sep	2020	Sep-2020	paper	ticket
8383701	plastic	51.0602292/4.0131718	BE	Sun Sep 27 2020	Sep	2020	Sep-2020	plastic
8383699	plastic, bottle	51.0586161/4.0247241	BE	Sun Sep 27 2020	Sep	2020	Sep-2020	plastic	bottle
8383698	plastic, plasticbag, tissues	51.0617904/4.0135542	BE	Sun Sep 27 2020	Sep	2020	Sep-2020	plastic	plasticbag	tissues
8383697	jupiler, can	51.0599176/4.0233421	BE	Sun Sep 27 2020	Sep	2020	Sep-2020	jupiler	can
8383695	cocacola	51.0600652/4.0233317	BE	Sun Sep 27 2020	Sep	2020	Sep-2020	cocacola
8383694	golden power	51.0599463/4.0233528	BE	Sun Sep 27 2020	Sep	2020	Sep-2020	golden power
8383693	plastic, can	51.0599162/4.023348	BE	Sun Sep 27 2020	Sep	2020	Sep-2020	plastic	can
8383691	jupiler, can, beer	51.0562817/4.0235458	BE	Sun Sep 27 2020	Sep	2020	Sep-2020	jupiler	can	beer
8383690	jupiler	51.0562728/4.0235148	BE	Sun Sep 27 2020	Sep	2020	Sep-2020	jupiler
8383689	can, golden power	51.0582328/4.0188335	BE	Sun Sep 27 2020	Sep	2020	Sep-2020	can	golden power
8383688	plastic, plasticbag	51.0588595/4.0186525	BE	Sun Sep 27 2020	Sep	2020	Sep-2020	plastic	plasticbag
8383687	can, icethea	51.0591926/4.0241321	BE	Sun Sep 27 2020	Sep	2020	Sep-2020	can	icethea
8383685	argus pils, beer, can	51.0599515/4.0233566	BE	Sun Sep 27 2020	Sep	2020	Sep-2020	argus pils	beer	can
8383684	alcohol, beer, jupiler, drink, jupilair	51.0592088/4.0194558	BE	Sun Sep 27 2020	Sep	2020	Sep-2020	alcohol	beer	jupiler	drink	jupilair
8383683	can	51.0562827/4.0235391	BE	Sun Sep 27 2020	Sep	2020	Sep-2020	can
8364004	plastic	51.184597717486/2.80492020062368	BE	Sun Sep 27 2020	Sep	2020	Sep-2020	plastic
8363925	plastic	51.1845659075136/2.80512536903914	BE	Sun Sep 27 2020	Sep	2020	Sep-2020	plastic
8361930	plastic	51.1797057339365/2.79444027984008	BE	Sun Sep 27 2020	Sep	2020	Sep-2020	plastic
8361929	plastic	51.1796406853118/2.79450757375822	BE	Sun Sep 27 2020	Sep	2020	Sep-2020	plastic
8361873	plastic	51.1798093419897/2.79428388270104	BE	Sun Sep 27 2020	Sep	2020	Sep-2020	plastic
8361744	shoe	51.1797200326564/2.79426524452818	BE	Sun Sep 27 2020	Sep	2020	Sep-2020	shoe
8361669	plastic	51.1797068762009/2.79314948818313	BE	Sun Sep 27 2020	Sep	2020	Sep-2020	plastic
8361459	plastic	51.1789253201022/2.79217122907487	BE	Sun Sep 27 2020	Sep	2020	Sep-2020	plastic
8361355	wrapper, plastic	51.1784926235494/2.7922495595086	BE	Sun Sep 27 2020	Sep	2020	Sep-2020	wrapper	plastic
8361202	plastic	51.1780843488651/2.79157880249261	BE	Sun Sep 27 2020	Sep	2020	Sep-2020	plastic
8360932	plastic	51.1784601268994/2.79166308941546	BE	Sun Sep 27 2020	Sep	2020	Sep-2020	plastic
8360850	plastic, cup	51.1783993559803/2.79174254836905	BE	Sun Sep 27 2020	Sep	2020	Sep-2020	plastic	cup
8360840	polystyrene	51.1781958086048/2.79111428230842	BE	Sun Sep 27 2020	Sep	2020	Sep-2020	polystyrene
8360839	plastic	51.178201220384/2.79116287317026	BE	Sun Sep 27 2020	Sep	2020	Sep-2020	plastic
8360837	plastic	51.1782337353606/2.79111242865309	BE	Sun Sep 27 2020	Sep	2020	Sep-2020	plastic
8360835	plastic	51.1782086867252/2.79113990355732	BE	Sun Sep 27 2020	Sep	2020	Sep-2020	plastic
8360125	plastic, wrapper	51.178646605448/2.79207973043759	BE	Sun Sep 27 2020	Sep	2020	Sep-2020	plastic	wrapper
8359999	plastic	51.1781501268729/2.79051303856049	BE	Sun Sep 27 2020	Sep	2020	Sep-2020	plastic
8359996	plastic	51.1782089523399/2.79070698661922	BE	Sun Sep 27 2020	Sep	2020	Sep-2020	plastic
8359954	bottle, drink, plastic, plasticbottle, water, waterbottle	51.1782413420812/2.79071097241807	BE	Sun Sep 27 2020	Sep	2020	Sep-2020	bottle	drink	plastic	plasticbottle	water	waterbottle
8359945	plastic, spoon	51.1782099960057/2.79069618282336	BE	Sun Sep 27 2020	Sep	2020	Sep-2020	plastic	spoon
8359942	plastic	51.1782425499214/2.79074965537331	BE	Sun Sep 27 2020	Sep	2020	Sep-2020	plastic
8359938	plastic	51.1782152349884/2.79076078126302	BE	Sun Sep 27 2020	Sep	2020	Sep-2020	plastic
8359936	plastic, stick	51.1782331005135/2.79071107063904	BE	Sun Sep 27 2020	Sep	2020	Sep-2020	plastic	stick
8359823	bottlecap, plastic	51.1782496905926/2.79085792863937	BE	Sun Sep 27 2020	Sep	2020	Sep-2020	bottlecap	plastic
8359822	plastic, rope	51.1782316496158/2.79083893951372	BE	Sun Sep 27 2020	Sep	2020	Sep-2020	plastic	rope
8359821	plastic, rope	51.1782470341918/2.79084945975242	BE	Sun Sep 27 2020	Sep	2020	Sep-2020	plastic	rope
8359799	plastic	51.1783353629806/2.79103268404512	BE	Sun Sep 27 2020	Sep	2020	Sep-2020	plastic
8359796	plastic, wrapper	51.1783305500879/2.79105760947518	BE	Sun Sep 27 2020	Sep	2020	Sep-2020	plastic	wrapper
8359772	plastic	51.1783267695048/2.7910459861961	BE	Sun Sep 27 2020	Sep	2020	Sep-2020	plastic
8359771	plastic	51.1783336055803/2.79105971794766	BE	Sun Sep 27 2020	Sep	2020	Sep-2020	plastic
8359770	plastic	51.1783314399159/2.79104838357234	BE	Sun Sep 27 2020	Sep	2020	Sep-2020	plastic
8359769	plastic	51.1783403719441/2.79107433033997	BE	Sun Sep 27 2020	Sep	2020	Sep-2020	plastic
8359747	glove, plastic	51.1782585172992/2.79114319104399	BE	Sun Sep 27 2020	Sep	2020	Sep-2020	glove	plastic
8359746	plastic	51.1783447156168/2.79113990769233	BE	Sun Sep 27 2020	Sep	2020	Sep-2020	plastic
8359745	plastic	51.1783690980102/2.79108641204022	BE	Sun Sep 27 2020	Sep	2020	Sep-2020	plastic
8359744	plastic	51.1783736623945/2.79117342606367	BE	Sun Sep 27 2020	Sep	2020	Sep-2020	plastic
8359648	plastic, wrapper	51.1784873500814/2.7918505625953	BE	Sun Sep 27 2020	Sep	2020	Sep-2020	plastic	wrapper
8359647	bottlecap, plastic	51.1788025732242/2.79202193623814	BE	Sun Sep 27 2020	Sep	2020	Sep-2020	bottlecap	plastic
8359600	plastic, wrapper	51.1785693315059/2.79186329385938	BE	Sun Sep 27 2020	Sep	2020	Sep-2020	plastic	wrapper
8359599	plastic	51.1789574852638/2.79315206688048	BE	Sun Sep 27 2020	Sep	2020	Sep-2020	plastic
8359585	piece, plastic	51.1789130983621/2.79246999640104	BE	Sun Sep 27 2020	Sep	2020	Sep-2020	piece	plastic
8359584	bottlecap, plastic	51.1788971969421/2.79245253385805	BE	Sun Sep 27 2020	Sep	2020	Sep-2020	bottlecap	plastic
8359583	plastic	51.1789150645402/2.79249045860137	BE	Sun Sep 27 2020	Sep	2020	Sep-2020	plastic
8359582	bottlecap, plastic	51.1789210737172/2.79245640010526	BE	Sun Sep 27 2020	Sep	2020	Sep-2020	bottlecap	plastic
8359581	bottlecap, plastic	51.1789192427873/2.7924663704949	BE	Sun Sep 27 2020	Sep	2020	Sep-2020	bottlecap	plastic
8359580	plastic	51.1789149763798/2.79250322498337	BE	Sun Sep 27 2020	Sep	2020	Sep-2020	plastic
8359579	plastic	51.1789064044707/2.79246111807933	BE	Sun Sep 27 2020	Sep	2020	Sep-2020	plastic
8359473	bottlecap, plastic	51.1796007967874/2.7936954898194	BE	Sun Sep 27 2020	Sep	2020	Sep-2020	bottlecap	plastic
8359472	plastic, piece	51.1796197364961/2.79375340371812	BE	Sun Sep 27 2020	Sep	2020	Sep-2020	plastic	piece
8359471	plastic, piece	51.179618765254/2.79376243296052	BE	Sun Sep 27 2020	Sep	2020	Sep-2020	plastic	piece
8359470	plastic, stick	51.1796031283883/2.79367440141661	BE	Sun Sep 27 2020	Sep	2020	Sep-2020	plastic	stick
8359469	plastic, piece	51.1795776390378/2.79378063147267	BE	Sun Sep 27 2020	Sep	2020	Sep-2020	plastic	piece
8359468	plastic	51.1796285448102/2.7936963890479	BE	Sun Sep 27 2020	Sep	2020	Sep-2020	plastic
8359467	glassbottle	51.1796410728389/2.79366815657213	BE	Sun Sep 27 2020	Sep	2020	Sep-2020	glassbottle
8359464	plastic, piece	51.1795538292666/2.79370929439544	BE	Sun Sep 27 2020	Sep	2020	Sep-2020	plastic	piece
8359463	bottlecap, plastic	51.1794909686832/2.79368499530012	BE	Sun Sep 27 2020	Sep	2020	Sep-2020	bottlecap	plastic
8359462	piece, plastic	51.1795303449212/2.79371868446794	BE	Sun Sep 27 2020	Sep	2020	Sep-2020	piece	plastic
8359461	plastic, piece	51.1795037368295/2.79371510050204	BE	Sun Sep 27 2020	Sep	2020	Sep-2020	plastic	piece
8359419	plastic, wrapper	51.1800729687821/2.79556897132874	BE	Sun Sep 27 2020	Sep	2020	Sep-2020	plastic	wrapper
8359383	plastic, piece	51.1803739609437/2.79500697971542	BE	Sun Sep 27 2020	Sep	2020	Sep-2020	plastic	piece
8359382	can	51.1803352284814/2.79498972860675	BE	Sun Sep 27 2020	Sep	2020	Sep-2020	can
8359381	bottlecap, plastic	51.180373850141/2.79500850215765	BE	Sun Sep 27 2020	Sep	2020	Sep-2020	bottlecap	plastic
8359380	piece, plastic	51.180335790081/2.79500744544521	BE	Sun Sep 27 2020	Sep	2020	Sep-2020	piece	plastic
8359239	plastic, glove	51.1804602861726/2.79499268730474	BE	Sun Sep 27 2020	Sep	2020	Sep-2020	plastic	glove
8359238	piece, plastic	51.1804442885079/2.79512341226863	BE	Sun Sep 27 2020	Sep	2020	Sep-2020	piece	plastic
8359234	bottle, plastic, water	51.1798801369011/2.79540632244036	BE	Sun Sep 27 2020	Sep	2020	Sep-2020	bottle	plastic	water
8359197	plastic, piece	51.1803774392752/2.79514521053745	BE	Sun Sep 27 2020	Sep	2020	Sep-2020	plastic	piece
8359140	piece, plastic, stick	51.180541876138/2.7957258700982	BE	Sun Sep 27 2020	Sep	2020	Sep-2020	piece	plastic	stick
8359139	plastic, plasticspoon	51.1805425014463/2.79570673900083	BE	Sun Sep 27 2020	Sep	2020	Sep-2020	plastic	plasticspoon
8359138	bottlecap, plastic	51.180528679758/2.79573577164387	BE	Sun Sep 27 2020	Sep	2020	Sep-2020	bottlecap	plastic
8358983	metal	51.1810241244387/2.79704448834705	BE	Sun Sep 27 2020	Sep	2020	Sep-2020	metal
8358981	piece, plastic	51.1808061670336/2.79704296972562	BE	Sun Sep 27 2020	Sep	2020	Sep-2020	piece	plastic
8358970	plastic, piece	51.1811491889558/2.79720479890805	BE	Sun Sep 27 2020	Sep	2020	Sep-2020	plastic	piece
8358941	polystyrene	51.1807195768056/2.79706908313705	BE	Sun Sep 27 2020	Sep	2020	Sep-2020	polystyrene
8358940	piece, plastic	51.1811194363875/2.79758883776407	BE	Sun Sep 27 2020	Sep	2020	Sep-2020	piece	plastic
8358895	piece, plastic	51.1812243222094/2.79760892898206	BE	Sun Sep 27 2020	Sep	2020	Sep-2020	piece	plastic
8358800	piece, plastic	51.1812074817513/2.79761261969812	BE	Sun Sep 27 2020	Sep	2020	Sep-2020	piece	plastic
8358789	piece, polystyrene	51.1811982098913/2.79765294678364	BE	Sun Sep 27 2020	Sep	2020	Sep-2020	piece	polystyrene
8358788	piece, plastic	51.1811818833925/2.79770465146467	BE	Sun Sep 27 2020	Sep	2020	Sep-2020	piece	plastic
8358641	piece, plastic	51.1815658749093/2.79812758099321	BE	Sun Sep 27 2020	Sep	2020	Sep-2020	piece	plastic
8358640	glass	51.1814484835729/2.7979147288616	BE	Sun Sep 27 2020	Sep	2020	Sep-2020	glass
8358639	piece, plastic	51.1815545198694/2.79813418282681	BE	Sun Sep 27 2020	Sep	2020	Sep-2020	piece	plastic
8358633	piece, plastic	51.1815587312178/2.79813282965252	BE	Sun Sep 27 2020	Sep	2020	Sep-2020	piece	plastic
8358632	piece, plastic	51.18155879179/2.79814174702902	BE	Sun Sep 27 2020	Sep	2020	Sep-2020	piece	plastic
8358511	bottlecap, plastic	51.1819157042123/2.79927807326782	BE	Sun Sep 27 2020	Sep	2020	Sep-2020	bottlecap	plastic
8358424	plastic, wrapper	51.181890556803/2.79920265844514	BE	Sun Sep 27 2020	Sep	2020	Sep-2020	plastic	wrapper
8358359	plastic	51.1818415289023/2.79925714830776	BE	Sun Sep 27 2020	Sep	2020	Sep-2020	plastic
8358294	polystyrene, piece	51.1821645432932/2.79963059857294	BE	Sun Sep 27 2020	Sep	2020	Sep-2020	polystyrene	piece
8358227	piece, plastic	51.1823960816722/2.79998200951448	BE	Sun Sep 27 2020	Sep	2020	Sep-2020	piece	plastic
8358189	plastic	51.1822240228007/2.80063007780454	BE	Sun Sep 27 2020	Sep	2020	Sep-2020	plastic
8358185	plastic	51.182399429626/2.79997424162095	BE	Sun Sep 27 2020	Sep	2020	Sep-2020	plastic
8358177	plastic, piece	51.1824827716056/2.8000242448403	BE	Sun Sep 27 2020	Sep	2020	Sep-2020	plastic	piece
8358175	plastic, snickers, wrapper	51.1825564413097/2.8000677236943	BE	Sun Sep 27 2020	Sep	2020	Sep-2020	plastic	snickers	wrapper
8358100	plastic	51.1825255346793/2.80036509273729	BE	Sun Sep 27 2020	Sep	2020	Sep-2020	plastic
8358096	bottlecap, plastic	51.1823241300439/2.80070772339183	BE	Sun Sep 27 2020	Sep	2020	Sep-2020	bottlecap	plastic
8357947	plastic, piece	51.1821681964031/2.80055281528847	BE	Sun Sep 27 2020	Sep	2020	Sep-2020	plastic	piece
8357708	plastic	51.1826146042915/2.80093095098153	BE	Sun Sep 27 2020	Sep	2020	Sep-2020	plastic
8357671	piece, plastic	51.1826330746238/2.80106245857307	BE	Sun Sep 27 2020	Sep	2020	Sep-2020	piece	plastic
8357625	plastic, cup	51.1829324339429/2.80120243551686	BE	Sun Sep 27 2020	Sep	2020	Sep-2020	plastic	cup
8357470	papier	51.0651446/4.2791797	BE	Sun Sep 27 2020	Sep	2020	Sep-2020	papier
8357469	paper	51.0649935/4.2790491	BE	Sun Sep 27 2020	Sep	2020	Sep-2020	paper
8357468	paper	51.0649183/4.2790858	BE	Sun Sep 27 2020	Sep	2020	Sep-2020	paper
8357467	plastic	51.064883/4.2790244	BE	Sun Sep 27 2020	Sep	2020	Sep-2020	plastic
8357466	plastic	51.0651407/4.2792073	BE	Sun Sep 27 2020	Sep	2020	Sep-2020	plastic
8357464	plastic	51.0649904/4.2791021	BE	Sun Sep 27 2020	Sep	2020	Sep-2020	plastic
8357463	plastic	51.0649979/4.2790578	BE	Sun Sep 27 2020	Sep	2020	Sep-2020	plastic
8357462	plastic	51.0651153/4.2791978	BE	Sun Sep 27 2020	Sep	2020	Sep-2020	plastic
8357460	plastic	51.0645911/4.2790758	BE	Sun Sep 27 2020	Sep	2020	Sep-2020	plastic
8357459	plastic	51.0646462/4.2790686	BE	Sun Sep 27 2020	Sep	2020	Sep-2020	plastic
8357458	plastic	51.0647048/4.2790338	BE	Sun Sep 27 2020	Sep	2020	Sep-2020	plastic
8357457	paper	51.0643466/4.2791557	BE	Sun Sep 27 2020	Sep	2020	Sep-2020	paper
8357456	drinkcarton	51.0645838/4.2790687	BE	Sun Sep 27 2020	Sep	2020	Sep-2020	drinkcarton
8357455	candywrapper	51.0643324/4.2791199	BE	Sun Sep 27 2020	Sep	2020	Sep-2020	candywrapper
8357454	plastic	51.0643166/4.2790919	BE	Sun Sep 27 2020	Sep	2020	Sep-2020	plastic
8357453	plastic	51.064578/4.2791664	BE	Sun Sep 27 2020	Sep	2020	Sep-2020	plastic
8357452	plastic	51.0640257/4.2791685	BE	Sun Sep 27 2020	Sep	2020	Sep-2020	plastic
8357451	paper	51.0645973/4.2790857	BE	Sun Sep 27 2020	Sep	2020	Sep-2020	paper
8357450	paper	51.0643996/4.2791593	BE	Sun Sep 27 2020	Sep	2020	Sep-2020	paper
8357449	plastic	51.0641201/4.2791457	BE	Sun Sep 27 2020	Sep	2020	Sep-2020	plastic
8357448	facemask	51.0646042/4.27903	BE	Sun Sep 27 2020	Sep	2020	Sep-2020	facemask
8357447	paper	51.0645591/4.2790609	BE	Sun Sep 27 2020	Sep	2020	Sep-2020	paper
8357446	plastic	51.0641081/4.2791368	BE	Sun Sep 27 2020	Sep	2020	Sep-2020	plastic
8357445	paper	51.0639738/4.2791421	BE	Sun Sep 27 2020	Sep	2020	Sep-2020	paper
8357444	plasticbottle	51.0638576/4.2791607	BE	Sun Sep 27 2020	Sep	2020	Sep-2020	plasticbottle
8357443	plastic	51.0639866/4.279146	BE	Sun Sep 27 2020	Sep	2020	Sep-2020	plastic
8357442	paper	51.0567502/4.2864039	BE	Sun Sep 27 2020	Sep	2020	Sep-2020	paper
8357441	plastic	51.0567069/4.2864726	BE	Sun Sep 27 2020	Sep	2020	Sep-2020	plastic
8357440	paper	51.0567163/4.2867232	BE	Sun Sep 27 2020	Sep	2020	Sep-2020	paper
8357439	plastic	51.0565527/4.2871724	BE	Sun Sep 27 2020	Sep	2020	Sep-2020	plastic
8357438	plastic	51.0638663/4.2791447	BE	Sun Sep 27 2020	Sep	2020	Sep-2020	plastic
8357437	paper	51.0589555/4.279682	BE	Sun Sep 27 2020	Sep	2020	Sep-2020	paper
8357436	plastic	51.0636386/4.2791556	BE	Sun Sep 27 2020	Sep	2020	Sep-2020	plastic
8357435	paper	51.056699/4.286458	BE	Sun Sep 27 2020	Sep	2020	Sep-2020	paper
8357434	cigarette	51.0638663/4.2791447	BE	Sun Sep 27 2020	Sep	2020	Sep-2020	cigarette
8357433	paper	51.0567037/4.2864675	BE	Sun Sep 27 2020	Sep	2020	Sep-2020	paper
8357432	can, cocacola	51.056845/4.2862569	BE	Sun Sep 27 2020	Sep	2020	Sep-2020	can	cocacola
8357431	plastic	51.0565562/4.2871119	BE	Sun Sep 27 2020	Sep	2020	Sep-2020	plastic
8357430	plastic, tube	51.0570668/4.2857097	BE	Sun Sep 27 2020	Sep	2020	Sep-2020	plastic	tube
8357428	wrapper, plastic	51.0568874/4.2861785	BE	Sun Sep 27 2020	Sep	2020	Sep-2020	wrapper	plastic
8357427	bottle	51.0571628/4.2854527	BE	Sun Sep 27 2020	Sep	2020	Sep-2020	bottle
8357426	paper	51.0568322/4.286678	BE	Sun Sep 27 2020	Sep	2020	Sep-2020	paper
8357425	plastic	51.0568675/4.2860465	BE	Sun Sep 27 2020	Sep	2020	Sep-2020	plastic
8357424	plastic	51.0567807/4.2864685	BE	Sun Sep 27 2020	Sep	2020	Sep-2020	plastic
8357423	plastic	51.0566259/4.287139	BE	Sun Sep 27 2020	Sep	2020	Sep-2020	plastic
8357422	paper	51.05657/4.2872062	BE	Sun Sep 27 2020	Sep	2020	Sep-2020	paper
8357421	plastic	51.0567846/4.286673	BE	Sun Sep 27 2020	Sep	2020	Sep-2020	plastic
8357420	facemask	51.0571075/4.2855599	BE	Sun Sep 27 2020	Sep	2020	Sep-2020	facemask
8357419	plastic	51.0569428/4.2860596	BE	Sun Sep 27 2020	Sep	2020	Sep-2020	plastic
8357418	plastic	51.060348/4.3351392	BE	Sun Sep 27 2020	Sep	2020	Sep-2020	plastic
8357417	can	51.0567359/4.2868661	BE	Sun Sep 27 2020	Sep	2020	Sep-2020	can
8357416	plastic	51.0603354/4.3350784	BE	Sun Sep 27 2020	Sep	2020	Sep-2020	plastic
8357415	wrapper	51.0568347/4.2864821	BE	Sun Sep 27 2020	Sep	2020	Sep-2020	wrapper
8357414	plastic	51.0603437/4.3349238	BE	Sun Sep 27 2020	Sep	2020	Sep-2020	plastic
8357413	plastic	51.0603371/4.3349394	BE	Sun Sep 27 2020	Sep	2020	Sep-2020	plastic
8357412	plastic, bottlecap	51.0603478/4.3349287	BE	Sun Sep 27 2020	Sep	2020	Sep-2020	plastic	bottlecap
8357411	candywrapper	51.060338/4.3348936	BE	Sun Sep 27 2020	Sep	2020	Sep-2020	candywrapper
8357410	can	51.0604668/4.3346064	BE	Sun Sep 27 2020	Sep	2020	Sep-2020	can
8357409	can	51.0604644/4.3345777	BE	Sun Sep 27 2020	Sep	2020	Sep-2020	can
8357408	paper	51.0602933/4.3348947	BE	Sun Sep 27 2020	Sep	2020	Sep-2020	paper
8357407	plastic	51.060305/4.3348529	BE	Sun Sep 27 2020	Sep	2020	Sep-2020	plastic
8357406	bottlecap	51.0603289/4.3349418	BE	Sun Sep 27 2020	Sep	2020	Sep-2020	bottlecap
8357405	paper	51.0603468/4.3348972	BE	Sun Sep 27 2020	Sep	2020	Sep-2020	paper
8357404	bottlecap	51.0603243/4.3349023	BE	Sun Sep 27 2020	Sep	2020	Sep-2020	bottlecap
8357403	bottlecap	51.0603257/4.3349278	BE	Sun Sep 27 2020	Sep	2020	Sep-2020	bottlecap
8357402	bottle	51.0604075/4.3345083	BE	Sun Sep 27 2020	Sep	2020	Sep-2020	bottle
8357401	plastic	51.0603557/4.3346971	BE	Sun Sep 27 2020	Sep	2020	Sep-2020	plastic
8357400	can	51.060391/4.3346251	BE	Sun Sep 27 2020	Sep	2020	Sep-2020	can
8357399	aluminium	51.0604124/4.3341059	BE	Sun Sep 27 2020	Sep	2020	Sep-2020	aluminium
8357398	bottlecap	51.0604612/4.3345701	BE	Sun Sep 27 2020	Sep	2020	Sep-2020	bottlecap
8357397	plastic	51.0604244/4.3341261	BE	Sun Sep 27 2020	Sep	2020	Sep-2020	plastic
8357396	rubber	51.0604237/4.3342658	BE	Sun Sep 27 2020	Sep	2020	Sep-2020	rubber
8357395	rubber	51.0604323/4.3342646	BE	Sun Sep 27 2020	Sep	2020	Sep-2020	rubber
8357394	plastic	51.0604175/4.3340927	BE	Sun Sep 27 2020	Sep	2020	Sep-2020	plastic
8357393	facemask	51.0604694/4.3342958	BE	Sun Sep 27 2020	Sep	2020	Sep-2020	facemask
8357392	plastic	51.0604577/4.3344681	BE	Sun Sep 27 2020	Sep	2020	Sep-2020	plastic
8357391	medicine	51.0604273/4.3341046	BE	Sun Sep 27 2020	Sep	2020	Sep-2020	medicine
8357390	aluminum	51.0604389/4.3344345	BE	Sun Sep 27 2020	Sep	2020	Sep-2020	aluminum
8357389	electronics	51.0604215/4.3342498	BE	Sun Sep 27 2020	Sep	2020	Sep-2020	electronics
8357388	plastic, wrapper	51.0604264/4.3341026	BE	Sun Sep 27 2020	Sep	2020	Sep-2020	plastic	wrapper
8357387	plastic	51.0604244/4.3341261	BE	Sun Sep 27 2020	Sep	2020	Sep-2020	plastic
8357386	plastic	51.0604277/4.3341202	BE	Sun Sep 27 2020	Sep	2020	Sep-2020	plastic
8357385	iron	51.0604124/4.3341059	BE	Sun Sep 27 2020	Sep	2020	Sep-2020	iron
8357384	plastic	51.0603352/4.3341342	BE	Sun Sep 27 2020	Sep	2020	Sep-2020	plastic
8357383	plastic	51.0603471/4.3340686	BE	Sun Sep 27 2020	Sep	2020	Sep-2020	plastic
8357382	plastic	51.0603559/4.3341065	BE	Sun Sep 27 2020	Sep	2020	Sep-2020	plastic
8357381	plastic, paper	51.060313/4.3341198	BE	Sun Sep 27 2020	Sep	2020	Sep-2020	plastic	paper
8357380	balpen	51.0601611/4.334153	BE	Sun Sep 27 2020	Sep	2020	Sep-2020	balpen
8357379	aluminium	51.060351/4.3340722	BE	Sun Sep 27 2020	Sep	2020	Sep-2020	aluminium
8357378	wrapper	51.0601987/4.3340019	BE	Sun Sep 27 2020	Sep	2020	Sep-2020	wrapper
8357377	can	51.0601709/4.3341189	BE	Sun Sep 27 2020	Sep	2020	Sep-2020	can
8357376	paper	51.060313/4.3341198	BE	Sun Sep 27 2020	Sep	2020	Sep-2020	paper
8357375	rubber	51.0601833/4.3341571	BE	Sun Sep 27 2020	Sep	2020	Sep-2020	rubber
8357374	paper	51.060378/4.3341506	BE	Sun Sep 27 2020	Sep	2020	Sep-2020	paper
8357373	plastic	51.0604163/4.3341034	BE	Sun Sep 27 2020	Sep	2020	Sep-2020	plastic
8357372	plastic	51.0601751/4.3341122	BE	Sun Sep 27 2020	Sep	2020	Sep-2020	plastic
8357371	iron	51.0601763/4.3341286	BE	Sun Sep 27 2020	Sep	2020	Sep-2020	iron
8357370	plastic	51.0601971/4.3340927	BE	Sun Sep 27 2020	Sep	2020	Sep-2020	plastic
8357368	plastic	51.0601257/4.3344889	BE	Sun Sep 27 2020	Sep	2020	Sep-2020	plastic
8357367	cup	51.0601257/4.3344889	BE	Sun Sep 27 2020	Sep	2020	Sep-2020	cup
8357366	plastic	51.0601631/4.3341601	BE	Sun Sep 27 2020	Sep	2020	Sep-2020	plastic
8357365	plastic	51.060188/4.3341933	BE	Sun Sep 27 2020	Sep	2020	Sep-2020	plastic
8357364	wrapper	51.0601862/4.3342305	BE	Sun Sep 27 2020	Sep	2020	Sep-2020	wrapper
8357363	wrapper	51.060132/4.3347507	BE	Sun Sep 27 2020	Sep	2020	Sep-2020	wrapper
8357362	styrofoam	51.0600776/4.3347191	BE	Sun Sep 27 2020	Sep	2020	Sep-2020	styrofoam
8357361	plastic	51.0600643/4.3349351	BE	Sun Sep 27 2020	Sep	2020	Sep-2020	plastic
8357360	cigarette	51.0601002/4.3346006	BE	Sun Sep 27 2020	Sep	2020	Sep-2020	cigarette
8357359	plastic	51.0600748/4.3349394	BE	Sun Sep 27 2020	Sep	2020	Sep-2020	plastic
8357358	plastic	51.0601866/4.3350634	BE	Sun Sep 27 2020	Sep	2020	Sep-2020	plastic
8357357	plastic	51.0600415/4.3348687	BE	Sun Sep 27 2020	Sep	2020	Sep-2020	plastic
8357356	wrapper	51.060026/4.3350045	BE	Sun Sep 27 2020	Sep	2020	Sep-2020	wrapper
8357355	plastic	51.0601846/4.3350317	BE	Sun Sep 27 2020	Sep	2020	Sep-2020	plastic
8357354	wrapper	51.0601084/4.3347362	BE	Sun Sep 27 2020	Sep	2020	Sep-2020	wrapper
8357351	paper	51.0602482/4.3348315	BE	Sun Sep 27 2020	Sep	2020	Sep-2020	paper
8357350	metal	51.0602026/4.3349738	BE	Sun Sep 27 2020	Sep	2020	Sep-2020	metal
8357349	plastic	51.0601822/4.3349558	BE	Sun Sep 27 2020	Sep	2020	Sep-2020	plastic
8357348	plastic	51.060248/4.334828	BE	Sun Sep 27 2020	Sep	2020	Sep-2020	plastic
8357347	strap	51.0601773/4.3349758	BE	Sun Sep 27 2020	Sep	2020	Sep-2020	strap
8357346	plastic	51.0603586/4.3347921	BE	Sun Sep 27 2020	Sep	2020	Sep-2020	plastic
8357345	plastic	51.0602492/4.3348288	BE	Sun Sep 27 2020	Sep	2020	Sep-2020	plastic
8357344	plastic	51.0601968/4.3349122	BE	Sun Sep 27 2020	Sep	2020	Sep-2020	plastic
8357343	bottle	51.0603053/4.3348261	BE	Sun Sep 27 2020	Sep	2020	Sep-2020	bottle
8357342	wrapper	51.0602691/4.3348321	BE	Sun Sep 27 2020	Sep	2020	Sep-2020	wrapper
8357341	iron	51.0603516/4.3348242	BE	Sun Sep 27 2020	Sep	2020	Sep-2020	iron
8357340	aluminium	51.0603868/4.3348722	BE	Sun Sep 27 2020	Sep	2020	Sep-2020	aluminium
8357339	plastic	51.0603516/4.3348242	BE	Sun Sep 27 2020	Sep	2020	Sep-2020	plastic
8357338	plastic	51.0603315/4.3348208	BE	Sun Sep 27 2020	Sep	2020	Sep-2020	plastic
8357337	cigarettepack	51.0603877/4.3348842	BE	Sun Sep 27 2020	Sep	2020	Sep-2020	cigarettepack
8357336	plastic	51.0604086/4.3349195	BE	Sun Sep 27 2020	Sep	2020	Sep-2020	plastic
8357335	cigarette	51.0604394/4.3349444	BE	Sun Sep 27 2020	Sep	2020	Sep-2020	cigarette
8357334	paper	51.0604294/4.3357011	BE	Sun Sep 27 2020	Sep	2020	Sep-2020	paper
8357333	aluminum	51.060344/4.335521	BE	Sun Sep 27 2020	Sep	2020	Sep-2020	aluminum
8357332	aluminium	51.0604662/4.3349704	BE	Sun Sep 27 2020	Sep	2020	Sep-2020	aluminium
8357331	plastic	51.0605069/4.3353442	BE	Sun Sep 27 2020	Sep	2020	Sep-2020	plastic
8357330	rubber, rubberband	51.0604824/4.3353614	BE	Sun Sep 27 2020	Sep	2020	Sep-2020	rubber	rubberband
8357329	plastic	51.0604086/4.3349195	BE	Sun Sep 27 2020	Sep	2020	Sep-2020	plastic
8357328	bottle	51.0603793/4.3355411	BE	Sun Sep 27 2020	Sep	2020	Sep-2020	bottle
8357327	plastic	51.060402/4.3356848	BE	Sun Sep 27 2020	Sep	2020	Sep-2020	plastic
8357326	candywrapper	51.0604364/4.3356753	BE	Sun Sep 27 2020	Sep	2020	Sep-2020	candywrapper
8357325	paper	51.060382/4.3356668	BE	Sun Sep 27 2020	Sep	2020	Sep-2020	paper
8357324	candy	51.0604461/4.3354812	BE	Sun Sep 27 2020	Sep	2020	Sep-2020	candy
8357323	plastic	51.0604518/4.3354798	BE	Sun Sep 27 2020	Sep	2020	Sep-2020	plastic
8357322	cigarette	51.0603243/4.3354815	BE	Sun Sep 27 2020	Sep	2020	Sep-2020	cigarette
8357321	cigarette	51.0604296/4.3354808	BE	Sun Sep 27 2020	Sep	2020	Sep-2020	cigarette
8357320	plastic	51.060458/4.3354467	BE	Sun Sep 27 2020	Sep	2020	Sep-2020	plastic
8357319	plastic	51.0603749/4.3356	BE	Sun Sep 27 2020	Sep	2020	Sep-2020	plastic
8357318	wrapper	51.0604639/4.3355408	BE	Sun Sep 27 2020	Sep	2020	Sep-2020	wrapper
8357317	plastic	51.0604469/4.3355827	BE	Sun Sep 27 2020	Sep	2020	Sep-2020	plastic
8357316	plastic	51.0603/4.3356322	BE	Sun Sep 27 2020	Sep	2020	Sep-2020	plastic
8357315	plastic	51.060399/4.3356209	BE	Sun Sep 27 2020	Sep	2020	Sep-2020	plastic
8357314	wrapper	51.0604381/4.3356393	BE	Sun Sep 27 2020	Sep	2020	Sep-2020	wrapper
8357313	strap	51.0604594/4.3354682	BE	Sun Sep 27 2020	Sep	2020	Sep-2020	strap
8357312	plastic	51.0603888/4.3356516	BE	Sun Sep 27 2020	Sep	2020	Sep-2020	plastic
8357311	plastic	51.0602883/4.3356573	BE	Sun Sep 27 2020	Sep	2020	Sep-2020	plastic
8357310	plastic, strap	51.0604434/4.3356101	BE	Sun Sep 27 2020	Sep	2020	Sep-2020	plastic	strap
8357309	plastic	51.0602838/4.3356867	BE	Sun Sep 27 2020	Sep	2020	Sep-2020	plastic
8357308	candywrapper	51.060398/4.3356121	BE	Sun Sep 27 2020	Sep	2020	Sep-2020	candywrapper
8357307	plastic	51.0602449/4.335633	BE	Sun Sep 27 2020	Sep	2020	Sep-2020	plastic
8357306	paper, plastic	51.0602434/4.3356499	BE	Sun Sep 27 2020	Sep	2020	Sep-2020	paper	plastic
8357305	piece	51.0600445/4.3352858	BE	Sun Sep 27 2020	Sep	2020	Sep-2020	piece
8357304	straw	51.0601658/4.3355889	BE	Sun Sep 27 2020	Sep	2020	Sep-2020	straw
8357303	can	51.060063/4.3352549	BE	Sun Sep 27 2020	Sep	2020	Sep-2020	can
8357302	plastic	51.0602423/4.3356605	BE	Sun Sep 27 2020	Sep	2020	Sep-2020	plastic
8357301	paper	51.0602449/4.335633	BE	Sun Sep 27 2020	Sep	2020	Sep-2020	paper
8357300	bottlecap	51.0601384/4.3355667	BE	Sun Sep 27 2020	Sep	2020	Sep-2020	bottlecap
8357299	plastic	51.0602252/4.3356541	BE	Sun Sep 27 2020	Sep	2020	Sep-2020	plastic
8357298	can	51.0601637/4.3354328	BE	Sun Sep 27 2020	Sep	2020	Sep-2020	can
8357297	can, aluminum	51.0601271/4.3353005	BE	Sun Sep 27 2020	Sep	2020	Sep-2020	can	aluminum
8357296	strap	51.0601083/4.3354438	BE	Sun Sep 27 2020	Sep	2020	Sep-2020	strap
8357295	candywrapper	51.0601428/4.3355159	BE	Sun Sep 27 2020	Sep	2020	Sep-2020	candywrapper
8357293	can	51.0601797/4.3354275	BE	Sun Sep 27 2020	Sep	2020	Sep-2020	can
8357292	plastic	51.0601381/4.3355569	BE	Sun Sep 27 2020	Sep	2020	Sep-2020	plastic
8357247	plastic	51.1832208793625/2.80177176218086	BE	Sun Sep 27 2020	Sep	2020	Sep-2020	plastic
8356976	wrapper, plastic	51.1845877377048/2.80223733111145	BE	Sun Sep 27 2020	Sep	2020	Sep-2020	wrapper	plastic
8356492	plastic	51.1853975151718/2.80417952560666	BE	Sun Sep 27 2020	Sep	2020	Sep-2020	plastic
8356381	plastic, rope	51.1856458756034/2.80451811554209	BE	Sun Sep 27 2020	Sep	2020	Sep-2020	plastic	rope
8356328	rope, plastic, rubber	51.1844319770507/2.80529985247768	BE	Sun Sep 27 2020	Sep	2020	Sep-2020	rope	plastic	rubber
8356167	plastic, wrapper	51.1851901619131/2.80713149552182	BE	Sun Sep 27 2020	Sep	2020	Sep-2020	plastic	wrapper
8356074	plastic	51.1858956741436/2.80734069051655	BE	Sun Sep 27 2020	Sep	2020	Sep-2020	plastic
8356025	plastic	51.1864758114297/2.80783761259532	BE	Sun Sep 27 2020	Sep	2020	Sep-2020	plastic
8355778	plastic, wrapper	51.186973336939/2.80902498384648	BE	Sun Sep 27 2020	Sep	2020	Sep-2020	plastic	wrapper
8355530	glass	51.186477963019/2.81018581580665	BE	Sun Sep 27 2020	Sep	2020	Sep-2020	glass
8355510	plastic, wrapper	51.1868737151754/2.81067209420751	BE	Sun Sep 27 2020	Sep	2020	Sep-2020	plastic	wrapper
8355505	plastic	51.1886040370079/2.81261905467897	BE	Sun Sep 27 2020	Sep	2020	Sep-2020	plastic
8355504	plastic	51.1876191577348/2.81055018043834	BE	Sun Sep 27 2020	Sep	2020	Sep-2020	plastic
8355503	plastic, strap	51.188701263546/2.81331139322399	BE	Sun Sep 27 2020	Sep	2020	Sep-2020	plastic	strap
8355502	plastic, wrapper	51.1875870141201/2.81058245411174	BE	Sun Sep 27 2020	Sep	2020	Sep-2020	plastic	wrapper
8355501	plastic	51.1891650897677/2.81589923026653	BE	Sun Sep 27 2020	Sep	2020	Sep-2020	plastic
8352474	bottle	50.4864274816071/6.0366664297309	BE	Sun Sep 27 2020	Sep	2020	Sep-2020	bottle
8342710	paper	50.8115513917592/5.67031116869281	BE	Sun Sep 27 2020	Sep	2020	Sep-2020	paper
8342709	cigarette	50.8126798527286/5.6697020961302	BE	Sun Sep 27 2020	Sep	2020	Sep-2020	cigarette
8304494	plastic	51.0589652/4.0186232	BE	Sat Sep 26 2020	Sep	2020	Sep-2020	plastic
8304493	jupiler	51.0612054/4.0215992	BE	Sat Sep 26 2020	Sep	2020	Sep-2020	jupiler
8304491	beer, jupiler	51.0589621/4.0186361	BE	Sat Sep 26 2020	Sep	2020	Sep-2020	beer	jupiler
8304489	chipsbag	51.0588026/4.0183495	BE	Sat Sep 26 2020	Sep	2020	Sep-2020	chipsbag
8304488	plastic	51.0593035/4.0191087	BE	Sat Sep 26 2020	Sep	2020	Sep-2020	plastic
8304487	plastic	51.0604366/4.020799	BE	Sat Sep 26 2020	Sep	2020	Sep-2020	plastic
8304486	monsterenergy, can, drink	51.0622431/4.0171127	BE	Sat Sep 26 2020	Sep	2020	Sep-2020	monsterenergy	can	drink
8304485	can, drink, fanta	51.062899/4.0183422	BE	Sat Sep 26 2020	Sep	2020	Sep-2020	can	drink	fanta
8304484	plastic, drink	51.0585434/4.0137508	BE	Sat Sep 26 2020	Sep	2020	Sep-2020	plastic	drink
8304483	energydrink, goldenpower, can, drink	51.0625266/4.0175202	BE	Sat Sep 26 2020	Sep	2020	Sep-2020	energydrink	goldenpower	can	drink
8300096	plastic, can	51.1300312/4.0711432	BE	Sat Sep 26 2020	Sep	2020	Sep-2020	plastic	can
8300095	plastic	51.1306289/4.0763768	BE	Sat Sep 26 2020	Sep	2020	Sep-2020	plastic
8300092	metal, plastic	51.1308442/4.07118	BE	Sat Sep 26 2020	Sep	2020	Sep-2020	metal	plastic
8300090	plastic	51.1309717/4.0696432	BE	Sat Sep 26 2020	Sep	2020	Sep-2020	plastic
8300089	plastic	51.1321635/4.0741743	BE	Sat Sep 26 2020	Sep	2020	Sep-2020	plastic
8286423	paper	51.1498733/4.1211622	BE	Sat Sep 26 2020	Sep	2020	Sep-2020	paper
8286418	paper	51.1497326/4.1214324	BE	Sat Sep 26 2020	Sep	2020	Sep-2020	paper
8286417	can	51.1494448/4.1221165	BE	Sat Sep 26 2020	Sep	2020	Sep-2020	can
8286416	can	51.1495191/4.1219144	BE	Sat Sep 26 2020	Sep	2020	Sep-2020	can
8286415	plastic	51.1496413/4.1216706	BE	Sat Sep 26 2020	Sep	2020	Sep-2020	plastic
8286414	can	51.1493223/4.1223725	BE	Sat Sep 26 2020	Sep	2020	Sep-2020	can
8286413	can	51.1497257/4.1214789	BE	Sat Sep 26 2020	Sep	2020	Sep-2020	can
8286411	can	51.1493164/4.12239	BE	Sat Sep 26 2020	Sep	2020	Sep-2020	can
8286408	plastic	51.1496486/4.1216656	BE	Sat Sep 26 2020	Sep	2020	Sep-2020	plastic
8286407	paper	51.1498614/4.1211918	BE	Sat Sep 26 2020	Sep	2020	Sep-2020	paper
8286406	plastic	51.1493377/4.1223564	BE	Sat Sep 26 2020	Sep	2020	Sep-2020	plastic
8286405	paper	51.1498733/4.1211622	BE	Sat Sep 26 2020	Sep	2020	Sep-2020	paper
8241180	can	50.8873423/4.7333529	BE	Thu Sep 24 2020	Sep	2020	Sep-2020	can
8241179	wrapper	50.8872948/4.7331952	BE	Thu Sep 24 2020	Sep	2020	Sep-2020	wrapper
8241178	wrapper	50.8788798/4.7305875	BE	Wed Sep 23 2020	Sep	2020	Sep-2020	wrapper
8241177	can	50.8873436/4.7334329	BE	Thu Sep 24 2020	Sep	2020	Sep-2020	can
8241176	bottle, plastic	50.8884102/4.732515	BE	Thu Sep 24 2020	Sep	2020	Sep-2020	bottle	plastic
8241175	can	50.8802927/4.7333462	BE	Wed Sep 23 2020	Sep	2020	Sep-2020	can
8241174	plastic, paper	50.8816599/4.7348203	BE	Wed Sep 23 2020	Sep	2020	Sep-2020	plastic	paper
8241173	plastic	50.8812006/4.7347823	BE	Wed Sep 23 2020	Sep	2020	Sep-2020	plastic
8241172	cigarette, plastic	50.8863532/4.7301756	BE	Thu Sep 24 2020	Sep	2020	Sep-2020	cigarette	plastic
8241171	energydrink, can, redbull	50.9263177/4.7241206	BE	Wed Sep 16 2020	Sep	2020	Sep-2020	energydrink	can	redbull
8241170	miscellaneous	50.887036/4.7328128	BE	Thu Sep 24 2020	Sep	2020	Sep-2020	miscellaneous
8241169	bottle, plastic	50.8878441/4.7334674	BE	Thu Sep 24 2020	Sep	2020	Sep-2020	bottle	plastic
8241168	plastic	50.8804281/4.7337443	BE	Wed Sep 23 2020	Sep	2020	Sep-2020	plastic
8241167	cigarettepack	50.8866447/4.7306492	BE	Thu Sep 24 2020	Sep	2020	Sep-2020	cigarettepack
8241166	bottlecap	50.8877518/4.733666	BE	Thu Sep 24 2020	Sep	2020	Sep-2020	bottlecap
8241165	bottlecap	50.8871784/4.7321797	BE	Thu Sep 24 2020	Sep	2020	Sep-2020	bottlecap
8241164	can	50.8802829/4.7333371	BE	Wed Sep 23 2020	Sep	2020	Sep-2020	can
8241163	plastic	50.8865851/4.7303411	BE	Thu Sep 24 2020	Sep	2020	Sep-2020	plastic
8241162	plastic	50.8862883/4.7313896	BE	Thu Sep 24 2020	Sep	2020	Sep-2020	plastic
8219975	sigarettenpeuk	51.073497471086/4.0408980981407	BE	Fri Sep 25 2020	Sep	2020	Sep-2020	sigarettenpeuk
8219934	sigarettenpeuk	51.073497471086/4.0408980981407	BE	Fri Sep 25 2020	Sep	2020	Sep-2020	sigarettenpeuk
8219933	plastic	51.0735012272741/4.04093405330989	BE	Fri Sep 25 2020	Sep	2020	Sep-2020	plastic
8219932	sigarettenpeuk	51.0734989828429/4.04091731007807	BE	Fri Sep 25 2020	Sep	2020	Sep-2020	sigarettenpeuk
8219931	sigarettenpeuk	51.0734836066215/4.04088787167344	BE	Fri Sep 25 2020	Sep	2020	Sep-2020	sigarettenpeuk
8219930	plastic, zakje	51.0734715707293/4.04067771259666	BE	Fri Sep 25 2020	Sep	2020	Sep-2020	plastic	zakje
8219929	sigarettenpeuk	51.0734715707293/4.04067771259666	BE	Fri Sep 25 2020	Sep	2020	Sep-2020	sigarettenpeuk
8218741	snoepverpakking	51.0737654866509/4.04185349085743	BE	Fri Sep 25 2020	Sep	2020	Sep-2020	snoepverpakking
8218740	panos, papier	51.0733851450751/4.04135801801052	BE	Fri Sep 25 2020	Sep	2020	Sep-2020	panos	papier
8218734	papier, rekening	51.073849084923/4.04187739495619	BE	Fri Sep 25 2020	Sep	2020	Sep-2020	papier	rekening
8218733	mondmasker	51.0737654866509/4.04185349085743	BE	Fri Sep 25 2020	Sep	2020	Sep-2020	mondmasker
8218732	vleesverpakking, rundervogel, zonder, kop, buurtslager	51.0739272357178/4.0418630819749	BE	Fri Sep 25 2020	Sep	2020	Sep-2020	vleesverpakking	rundervogel	zonder	kop	buurtslager
8218731	snoepverpakking, brownie	51.0737755060738/4.04190532210722	BE	Fri Sep 25 2020	Sep	2020	Sep-2020	snoepverpakking	brownie
8218715	vleesverpakking, buurtslager	51.073551909619/4.04090032506169	BE	Fri Sep 25 2020	Sep	2020	Sep-2020	vleesverpakking	buurtslager
8218714	vleesverpakking, buurtslager	51.0733660684173/4.04200406886269	BE	Fri Sep 25 2020	Sep	2020	Sep-2020	vleesverpakking	buurtslager
8218707	vleesverpakking, buurtslager	51.0733660684173/4.04200406886269	BE	Fri Sep 25 2020	Sep	2020	Sep-2020	vleesverpakking	buurtslager
8218704	verpakkingsmateriaal, straw	51.0727245356374/4.04064331220732	BE	Fri Sep 25 2020	Sep	2020	Sep-2020	verpakkingsmateriaal	straw
8218679	plastic, strap	51.0727245356374/4.04064331220732	BE	Fri Sep 25 2020	Sep	2020	Sep-2020	plastic	strap
8218678	metal, canclip	51.0730175392508/4.04098207007464	BE	Fri Sep 25 2020	Sep	2020	Sep-2020	metal	canclip
8218674	plastic, sigarettenpakje	51.0732553980389/4.04110314309919	BE	Fri Sep 25 2020	Sep	2020	Sep-2020	plastic	sigarettenpakje
8218673	sigarettenpeuk	51.0730175392508/4.04098207007464	BE	Fri Sep 25 2020	Sep	2020	Sep-2020	sigarettenpeuk
8218664	plastic, sigarettenpakje	51.0733288101803/4.04126424332695	BE	Fri Sep 25 2020	Sep	2020	Sep-2020	plastic	sigarettenpakje
8218663	bottlecap, jupiler	51.0733556988671/4.04127718184352	BE	Fri Sep 25 2020	Sep	2020	Sep-2020	bottlecap	jupiler
8218662	plastic	51.0733170994524/4.04119203898981	BE	Fri Sep 25 2020	Sep	2020	Sep-2020	plastic
8218661	bottlecap, jupiler	51.0734017935187/4.04115615157346	BE	Fri Sep 25 2020	Sep	2020	Sep-2020	bottlecap	jupiler
8218660	plastic, folie	51.0738228938721/4.04145619108542	BE	Fri Sep 25 2020	Sep	2020	Sep-2020	plastic	folie
8218659	snoepverpakking	51.0738228938721/4.04145619108542	BE	Fri Sep 25 2020	Sep	2020	Sep-2020	snoepverpakking
8218658	plastic, folie	51.0736855354957/4.04147093835139	BE	Fri Sep 25 2020	Sep	2020	Sep-2020	plastic	folie
8218657	kauwgomverpakking	51.0736855354957/4.04147093835139	BE	Fri Sep 25 2020	Sep	2020	Sep-2020	kauwgomverpakking
8218656	paper, disney	51.0733706290646/4.04101211717263	BE	Fri Sep 25 2020	Sep	2020	Sep-2020	paper	disney
8218650	paper, rekening	51.07362849814/4.04126991752612	BE	Fri Sep 25 2020	Sep	2020	Sep-2020	paper	rekening
8218647	paper	51.0733706290646/4.04101211717263	BE	Fri Sep 25 2020	Sep	2020	Sep-2020	paper
8218644	sigarettenpeuk	51.0733476205665/4.04094567202291	BE	Fri Sep 25 2020	Sep	2020	Sep-2020	sigarettenpeuk
8218636	koker, karton	51.0737147849115/4.04123320013524	BE	Fri Sep 25 2020	Sep	2020	Sep-2020	koker	karton
8218620	plastic, piece	51.0734608784458/4.04098962762136	BE	Fri Sep 25 2020	Sep	2020	Sep-2020	plastic	piece
8218619	sigarettenpeuk	51.0734678332649/4.04099259316619	BE	Fri Sep 25 2020	Sep	2020	Sep-2020	sigarettenpeuk
8218618	can, aluminum, cocacola	51.0734671173467/4.04096863910636	BE	Fri Sep 25 2020	Sep	2020	Sep-2020	can	aluminum	cocacola
8218616	sigarettenpeuk	51.0734654977007/4.04096564990573	BE	Fri Sep 25 2020	Sep	2020	Sep-2020	sigarettenpeuk
8218613	sigarettenpeuk	51.0734613676538/4.04095339600565	BE	Fri Sep 25 2020	Sep	2020	Sep-2020	sigarettenpeuk
8218611	sigarettenpeuk	51.0734601346209/4.04096975108957	BE	Fri Sep 25 2020	Sep	2020	Sep-2020	sigarettenpeuk
8218610	sigarettenpeuk	51.0735420383588/4.04093131567042	BE	Fri Sep 25 2020	Sep	2020	Sep-2020	sigarettenpeuk
8218609	sigarettenpeuk	51.0737148485365/4.04079571752043	BE	Fri Sep 25 2020	Sep	2020	Sep-2020	sigarettenpeuk
8218608	sigarettenpeuk	51.0737313721031/4.04080446348615	BE	Fri Sep 25 2020	Sep	2020	Sep-2020	sigarettenpeuk
8218607	paper	51.0734207909162/4.04088252910901	BE	Fri Sep 25 2020	Sep	2020	Sep-2020	paper
8218605	metal, canclip	51.0735388688987/4.04114333981597	BE	Fri Sep 25 2020	Sep	2020	Sep-2020	metal	canclip
8218598	sigarettenpeuk	51.0736782875601/4.04094557978884	BE	Fri Sep 25 2020	Sep	2020	Sep-2020	sigarettenpeuk
8218595	sigarettenpeuk	51.073400395328/4.04083410434144	BE	Fri Sep 25 2020	Sep	2020	Sep-2020	sigarettenpeuk
8218593	sigarettenpeuk	51.0734030030902/4.04082983987012	BE	Fri Sep 25 2020	Sep	2020	Sep-2020	sigarettenpeuk
8218588	sigarettenpeuk	51.0734285610042/4.04082411551492	BE	Fri Sep 25 2020	Sep	2020	Sep-2020	sigarettenpeuk
8218585	sigarettenpeuk	51.0734017188622/4.04083010376722	BE	Fri Sep 25 2020	Sep	2020	Sep-2020	sigarettenpeuk
8218577	sigarettenpeuk	51.0735262238192/4.04077731296875	BE	Fri Sep 25 2020	Sep	2020	Sep-2020	sigarettenpeuk
8218576	sigarettenpeuk	51.0734271397242/4.04086657731988	BE	Fri Sep 25 2020	Sep	2020	Sep-2020	sigarettenpeuk
8218575	sigarettenpeuk	51.0740890752966/4.0411089255737	BE	Fri Sep 25 2020	Sep	2020	Sep-2020	sigarettenpeuk
8218571	piece, plastic	51.0734207909162/4.04088252910901	BE	Fri Sep 25 2020	Sep	2020	Sep-2020	piece	plastic
8218569	etiket	51.0734869537/4.04094797687262	BE	Fri Sep 25 2020	Sep	2020	Sep-2020	etiket
8218564	sigarettenpeuk	51.0734285610042/4.04082411551492	BE	Fri Sep 25 2020	Sep	2020	Sep-2020	sigarettenpeuk
8218562	metal, schroef	51.0733425555874/4.04095917725699	BE	Fri Sep 25 2020	Sep	2020	Sep-2020	metal	schroef
8203703	plastic	51.1326554/4.0742195	BE	Fri Sep 25 2020	Sep	2020	Sep-2020	plastic
8203702	bottle	51.1321359/4.0741947	BE	Fri Sep 25 2020	Sep	2020	Sep-2020	bottle
8203701	candy	51.1321018/4.0741537	BE	Fri Sep 25 2020	Sep	2020	Sep-2020	candy
8203700	plastic	51.1321307/4.0742186	BE	Fri Sep 25 2020	Sep	2020	Sep-2020	plastic
8183617	can	51.0841046227618/3.77416798845285	BE	Thu Sep 24 2020	Sep	2020	Sep-2020	can
8183616	can	51.0841296008332/3.773621320728	BE	Thu Sep 24 2020	Sep	2020	Sep-2020	can
8183615	wrapper	51.0840859311177/3.77358787693435	BE	Thu Sep 24 2020	Sep	2020	Sep-2020	wrapper
8183614	cigarette	51.0840793513237/3.77419003285819	BE	Thu Sep 24 2020	Sep	2020	Sep-2020	cigarette
8183613	cigarette	51.0842345841705/3.77427871339375	BE	Thu Sep 24 2020	Sep	2020	Sep-2020	cigarette
8183612	paper, wrapper	51.084040543112/3.77412733622247	BE	Thu Sep 24 2020	Sep	2020	Sep-2020	paper	wrapper
8183611	plastic, wrapper	51.0841317382186/3.77369198017174	BE	Thu Sep 24 2020	Sep	2020	Sep-2020	plastic	wrapper
8183610	paper	51.0838781856476/3.77339224331432	BE	Thu Sep 24 2020	Sep	2020	Sep-2020	paper
8183609	plastic, wrapper	51.0836951776785/3.77357449321117	BE	Thu Sep 24 2020	Sep	2020	Sep-2020	plastic	wrapper
8183608	plastic	51.084103130988/3.77369235414644	BE	Thu Sep 24 2020	Sep	2020	Sep-2020	plastic
8183607	paper	51.0840600785044/3.77401984977447	BE	Thu Sep 24 2020	Sep	2020	Sep-2020	paper
8183606	plastic, wrapper	51.0841724323585/3.77355862409228	BE	Thu Sep 24 2020	Sep	2020	Sep-2020	plastic	wrapper
8183605	plastic, wrapper	51.0841885675221/3.77350958995872	BE	Thu Sep 24 2020	Sep	2020	Sep-2020	plastic	wrapper
8183604	balloon	51.0835816758229/3.7735214084422	BE	Thu Sep 24 2020	Sep	2020	Sep-2020	balloon
8171682	plastic, bag	51.0745864556596/4.04240150451467	BE	Thu Sep 24 2020	Sep	2020	Sep-2020	plastic	bag
8171681	katoen, lintje	51.0748672969389/4.04216490009655	BE	Thu Sep 24 2020	Sep	2020	Sep-2020	katoen	lintje
8171680	metal, moer	51.0749072089113/4.04242568385468	BE	Wed Sep 23 2020	Sep	2020	Sep-2020	metal	moer
8171678	plastic, zakje	51.0744606164555/4.04262029904735	BE	Thu Sep 24 2020	Sep	2020	Sep-2020	plastic	zakje
8171677	plastic, zakje	51.0745895199508/4.04287810424778	BE	Thu Sep 24 2020	Sep	2020	Sep-2020	plastic	zakje
8171676	rubber, tube	51.074768280629/4.04251206421432	BE	Thu Sep 24 2020	Sep	2020	Sep-2020	rubber	tube
8171675	plastic, tape	51.0744617975727/4.042696868411	BE	Thu Sep 24 2020	Sep	2020	Sep-2020	plastic	tape
8171674	plastic	51.0749473084221/4.04226098070147	BE	Wed Sep 23 2020	Sep	2020	Sep-2020	plastic
8163835	cup, papercup, plastic	50.9350276/3.1854563	BE	Thu Sep 24 2020	Sep	2020	Sep-2020	cup	papercup	plastic
8146764	bottlecap	51.0446097379886/5.02409134927029	BE	Wed Sep 23 2020	Sep	2020	Sep-2020	bottlecap
8146763	plastic	51.0446064630218/5.02410681448156	BE	Wed Sep 23 2020	Sep	2020	Sep-2020	plastic
8099462	sigarettenpeuk	51.0732015703103/4.04270125031744	BE	Tue Sep 22 2020	Sep	2020	Sep-2020	sigarettenpeuk
8099461	strappingband, plastic	51.0738405949126/4.04126085804357	BE	Tue Sep 22 2020	Sep	2020	Sep-2020	strappingband	plastic
8099460	mondkapje	51.0731026222991/4.04252389123793	BE	Tue Sep 22 2020	Sep	2020	Sep-2020	mondkapje
8099459	karton	51.0729857128647/4.04277590426741	BE	Tue Sep 22 2020	Sep	2020	Sep-2020	karton
8099457	sigarettenpeuk	51.0730625348926/4.04265461049532	BE	Tue Sep 22 2020	Sep	2020	Sep-2020	sigarettenpeuk
8099456	snoepverpakking	51.0730951753026/4.04265392086889	BE	Tue Sep 22 2020	Sep	2020	Sep-2020	snoepverpakking
8099454	sigarettenpeuk	51.0733206354039/4.04262957104959	BE	Tue Sep 22 2020	Sep	2020	Sep-2020	sigarettenpeuk
8099453	sigarettenpeuk	51.0733285432521/4.04252556727926	BE	Tue Sep 22 2020	Sep	2020	Sep-2020	sigarettenpeuk
8099452	sigarettenpeuk	51.0732834406046/4.04248348643822	BE	Tue Sep 22 2020	Sep	2020	Sep-2020	sigarettenpeuk
8099451	sigarettenpeuk	51.0733774543098/4.04250304166133	BE	Tue Sep 22 2020	Sep	2020	Sep-2020	sigarettenpeuk
8099450	sigarettenpeuk	51.0733087368958/4.04246892355815	BE	Tue Sep 22 2020	Sep	2020	Sep-2020	sigarettenpeuk
8099426	tape	51.0733163477038/4.0426143664732	BE	Tue Sep 22 2020	Sep	2020	Sep-2020	tape
8099425	schroef, metaal	51.0730296226634/4.04302975027093	BE	Tue Sep 22 2020	Sep	2020	Sep-2020	schroef	metaal
8099424	plastic, folie	51.0732350128795/4.04275017931774	BE	Tue Sep 22 2020	Sep	2020	Sep-2020	plastic	folie
8099421	plastic, folie	51.0732411004819/4.04279335086736	BE	Tue Sep 22 2020	Sep	2020	Sep-2020	plastic	folie
8099420	plastic, folie	51.0731494648193/4.04283152452024	BE	Tue Sep 22 2020	Sep	2020	Sep-2020	plastic	folie
8099379	vod, katoen	51.0736733744347/4.04155030496151	BE	Tue Sep 22 2020	Sep	2020	Sep-2020	vod	katoen
8099378	plastic, wikkel	51.0737749012886/4.04145347187378	BE	Tue Sep 22 2020	Sep	2020	Sep-2020	plastic	wikkel
8099377	plastic, deksel	51.0738494217313/4.04092950950413	BE	Tue Sep 22 2020	Sep	2020	Sep-2020	plastic	deksel
8099376	plastic	51.0738070918407/4.04170715056166	BE	Tue Sep 22 2020	Sep	2020	Sep-2020	plastic
8099375	zakje, plastic	51.0736946391824/4.04164768030192	BE	Tue Sep 22 2020	Sep	2020	Sep-2020	zakje	plastic
8099374	plastic	51.0738070918407/4.04170715056166	BE	Tue Sep 22 2020	Sep	2020	Sep-2020	plastic
8099373	plastic, staafje	51.073739344737/4.04189092442396	BE	Tue Sep 22 2020	Sep	2020	Sep-2020	plastic	staafje
8099372	aluminum, deksel, elinas	51.07365347392/4.04176047432172	BE	Tue Sep 22 2020	Sep	2020	Sep-2020	aluminum	deksel	elinas
8099371	plastic, strap	51.0737038834654/4.04185382127102	BE	Tue Sep 22 2020	Sep	2020	Sep-2020	plastic	strap
8099370	verf	51.073576091725/4.04190587426802	BE	Tue Sep 22 2020	Sep	2020	Sep-2020	verf
8099369	plastic, film	51.0734327190987/4.04237053711282	BE	Tue Sep 22 2020	Sep	2020	Sep-2020	plastic	film
8099367	metaal, staaf	51.0734062336936/4.04214543964777	BE	Tue Sep 22 2020	Sep	2020	Sep-2020	metaal	staaf
8099366	plastic, strap	51.0734686680837/4.04220424975521	BE	Tue Sep 22 2020	Sep	2020	Sep-2020	plastic	strap
8099365	plastic, cap	51.0731154485528/4.04227652639547	BE	Tue Sep 22 2020	Sep	2020	Sep-2020	plastic	cap
8099364	sigarettenpeuk	51.0732245270062/4.04225959902743	BE	Tue Sep 22 2020	Sep	2020	Sep-2020	sigarettenpeuk
8099363	sigarettenpeuk	51.0732509316195/4.04233459132859	BE	Tue Sep 22 2020	Sep	2020	Sep-2020	sigarettenpeuk
8099360	sigarettenpeuk	51.0730929760051/4.0422690315375	BE	Tue Sep 22 2020	Sep	2020	Sep-2020	sigarettenpeuk
8099359	sigarettenpeuk	51.0731443011335/4.04233992324738	BE	Tue Sep 22 2020	Sep	2020	Sep-2020	sigarettenpeuk
8099358	sigarettenpeuk	51.0730219712548/4.04183773370249	BE	Tue Sep 22 2020	Sep	2020	Sep-2020	sigarettenpeuk
8099357	plastic, tape	51.0733613005482/4.04229562321621	BE	Tue Sep 22 2020	Sep	2020	Sep-2020	plastic	tape
8099350	sigarettenpeuk	51.0730533025585/4.04180775816987	BE	Tue Sep 22 2020	Sep	2020	Sep-2020	sigarettenpeuk
8099349	sigarettenpeuk	51.0731429156012/4.04221705161141	BE	Tue Sep 22 2020	Sep	2020	Sep-2020	sigarettenpeuk
8099348	sigarettenpeuk	51.073054143106/4.0423429814045	BE	Tue Sep 22 2020	Sep	2020	Sep-2020	sigarettenpeuk
8099347	touw	51.0728913386701/4.04235557222139	BE	Tue Sep 22 2020	Sep	2020	Sep-2020	touw
8099345	plastic, sluiting	51.0730937305842/4.04238445534207	BE	Tue Sep 22 2020	Sep	2020	Sep-2020	plastic	sluiting
8099343	sigarettenpeuk	51.0730937305842/4.04238445534207	BE	Tue Sep 22 2020	Sep	2020	Sep-2020	sigarettenpeuk
8099342	sigarettenpeuk	51.0728058962226/4.04264678761569	BE	Tue Sep 22 2020	Sep	2020	Sep-2020	sigarettenpeuk
8099293	sigarettenpeuk	51.0731072773223/4.04181146105326	BE	Tue Sep 22 2020	Sep	2020	Sep-2020	sigarettenpeuk
8099292	sigarettenpeuk	51.0733935397581/4.04224150619367	BE	Tue Sep 22 2020	Sep	2020	Sep-2020	sigarettenpeuk
8099290	sigarettenpeuk	51.0733935397581/4.04224150619367	BE	Tue Sep 22 2020	Sep	2020	Sep-2020	sigarettenpeuk
8099288	sigarettenpeuk	51.0729978319945/4.04213265786585	BE	Tue Sep 22 2020	Sep	2020	Sep-2020	sigarettenpeuk
8099287	hout, pallet	51.0730792860223/4.04249687138379	BE	Tue Sep 22 2020	Sep	2020	Sep-2020	hout	pallet
8099286	hout	51.0730792860223/4.04249687138379	BE	Tue Sep 22 2020	Sep	2020	Sep-2020	hout
8099285	sigarettenpeuk	51.0731197821303/4.04259866163079	BE	Tue Sep 22 2020	Sep	2020	Sep-2020	sigarettenpeuk
8099284	papier, ticket	51.0731058202708/4.0426626195051	BE	Tue Sep 22 2020	Sep	2020	Sep-2020	papier	ticket
8099283	sigarettenpeuk	51.0733183598889/4.04228328195854	BE	Tue Sep 22 2020	Sep	2020	Sep-2020	sigarettenpeuk
8099282	sigarettenpeuk	51.0732015703103/4.04270125031744	BE	Tue Sep 22 2020	Sep	2020	Sep-2020	sigarettenpeuk
8099281	papier	51.0730472507487/4.04248036643887	BE	Tue Sep 22 2020	Sep	2020	Sep-2020	papier
8099280	plastic	51.0732758253667/4.04223016275894	BE	Tue Sep 22 2020	Sep	2020	Sep-2020	plastic
8099277	cigarette	51.074267658285/4.0470535240518	BE	Tue Sep 22 2020	Sep	2020	Sep-2020	cigarette
8096846	plastic, isolation	51.0844801/4.0956593	BE	Tue Sep 22 2020	Sep	2020	Sep-2020	plastic	isolation
8096845	paper, plastic, mcdonalds	51.0869491/4.1022051	BE	Tue Sep 22 2020	Sep	2020	Sep-2020	paper	plastic	mcdonalds
8096844	aluminum, can, jupiler	51.0868676/4.1141803	BE	Tue Sep 22 2020	Sep	2020	Sep-2020	aluminum	can	jupiler
8096843	plastic, concrete, hubo	51.0840805/4.0942742	BE	Tue Sep 22 2020	Sep	2020	Sep-2020	plastic	concrete	hubo
8096842	bag, styrofoam, plastic	51.0864192/4.1158668	BE	Tue Sep 22 2020	Sep	2020	Sep-2020	bag	styrofoam	plastic
8096841	bag, paper, plastic	51.0831042/4.089243	BE	Tue Sep 22 2020	Sep	2020	Sep-2020	bag	paper	plastic
8093361	cigarette, butt	51.0751877027108/4.04257563874502	BE	Tue Sep 22 2020	Sep	2020	Sep-2020	cigarette	butt
8091736	butt, cigarette, marlboro	51.0750239/4.0427192	BE	Tue Sep 22 2020	Sep	2020	Sep-2020	butt	cigarette	marlboro
8091701	plastic, cup	51.0752466274901/4.04277470894534	BE	Tue Sep 22 2020	Sep	2020	Sep-2020	plastic	cup
8089143	cigarette	51.1628358811617/4.14855047129481	BE	Tue Sep 22 2020	Sep	2020	Sep-2020	cigarette
8089142	cigarette	51.1628306005627/4.14856849238663	BE	Tue Sep 22 2020	Sep	2020	Sep-2020	cigarette
8089140	plastic	51.1628358811617/4.14855047129481	BE	Tue Sep 22 2020	Sep	2020	Sep-2020	plastic
8087690	beer, can, metal	50.9351007/3.1854596	BE	Tue Sep 22 2020	Sep	2020	Sep-2020	beer	can	metal
8087276	aluminum, can, metal, redbull	51.0782563/4.0779575	BE	Tue Sep 22 2020	Sep	2020	Sep-2020	aluminum	can	metal	redbull
8087273	piece, plastic	51.0745392/4.0429971	BE	Tue Sep 22 2020	Sep	2020	Sep-2020	piece	plastic
8087271	aluminum, can, redbull	51.0794174/4.075126	BE	Tue Sep 22 2020	Sep	2020	Sep-2020	aluminum	can	redbull
8072268	slippers	50.9762037/3.0835968	BE	Mon Sep 21 2020	Sep	2020	Sep-2020	slippers
8070426	bag	51.0358193/3.7454277	BE	Mon Sep 21 2020	Sep	2020	Sep-2020	bag
8066117	paper	51.093910707495/3.76349167734354	BE	Mon Sep 21 2020	Sep	2020	Sep-2020	paper
8054775	plastic	51.1723583333333/3.91096666666667	BE	Sat Sep 19 2020	Sep	2020	Sep-2020	plastic
8051473	can, metal, aluminium	50.8441355/4.7410503	BE	Mon Sep 21 2020	Sep	2020	Sep-2020	can	metal	aluminium
8051472	can, metal	50.8440384/4.7412381	BE	Mon Sep 21 2020	Sep	2020	Sep-2020	can	metal
8051471	plastic, bag	50.8435613/4.7422594	BE	Mon Sep 21 2020	Sep	2020	Sep-2020	plastic	bag
8051467	aluminum, can, lipton, metal	50.8437361/4.7420705	BE	Mon Sep 21 2020	Sep	2020	Sep-2020	aluminum	can	lipton	metal
8051465	metal, can	50.8435869/4.7422776	BE	Mon Sep 21 2020	Sep	2020	Sep-2020	metal	can
8051464	metal	50.8437392/4.7421102	BE	Mon Sep 21 2020	Sep	2020	Sep-2020	metal
8051454	carpet	50.8438542/4.7414642	BE	Mon Sep 21 2020	Sep	2020	Sep-2020	carpet
8051453	carpet	50.843752/4.7416355	BE	Mon Sep 21 2020	Sep	2020	Sep-2020	carpet
8051452	carpet	50.843752/4.7416355	BE	Mon Sep 21 2020	Sep	2020	Sep-2020	carpet
8051451	carpet	50.8438542/4.7414642	BE	Mon Sep 21 2020	Sep	2020	Sep-2020	carpet
8051450	carpet	50.8438542/4.7414642	BE	Mon Sep 21 2020	Sep	2020	Sep-2020	carpet
8051421	plastic	50.8457666/4.7395065	BE	Mon Sep 21 2020	Sep	2020	Sep-2020	plastic
8045939	plastic	50.8453863/4.7385778	BE	Mon Sep 21 2020	Sep	2020	Sep-2020	plastic
8045625	plastic	51.07420283/4.040475	BE	Fri Sep 18 2020	Sep	2020	Sep-2020	plastic
8045456	paper	51.0749787/4.0427635	BE	Mon Sep 21 2020	Sep	2020	Sep-2020	paper
8044783	stick, plastic	51.1071069414289/3.98638051273481	BE	Sun Sep 20 2020	Sep	2020	Sep-2020	stick	plastic
8044782	celluloseacetate, sigarettenpeuk	51.1072505802716/3.98660393415074	BE	Sun Sep 20 2020	Sep	2020	Sep-2020	celluloseacetate	sigarettenpeuk
8044781	can, metal	51.1072320119982/3.98642810043994	BE	Sun Sep 20 2020	Sep	2020	Sep-2020	can	metal
8044780	sigarettenpeuk	51.1071923400536/3.98645619309825	BE	Sun Sep 20 2020	Sep	2020	Sep-2020	sigarettenpeuk
8044778	sigarettenpeuk	51.1070982355126/3.98634923877212	BE	Sun Sep 20 2020	Sep	2020	Sep-2020	sigarettenpeuk
8044777	sigarettenpeuk	51.1071863267281/3.98645660678449	BE	Sun Sep 20 2020	Sep	2020	Sep-2020	sigarettenpeuk
8044776	sigarettenpeuk	51.1071515355566/3.98642275807844	BE	Sun Sep 20 2020	Sep	2020	Sep-2020	sigarettenpeuk
8044775	sigarettenpeuk	51.1071509712608/3.98639825160308	BE	Sun Sep 20 2020	Sep	2020	Sep-2020	sigarettenpeuk
8044774	sigarettenpeuk	51.1071564189269/3.98631110077552	BE	Sun Sep 20 2020	Sep	2020	Sep-2020	sigarettenpeuk
8044773	papier	51.1071591843365/3.9863041903161	BE	Sun Sep 20 2020	Sep	2020	Sep-2020	papier
8044772	sigarettenpeuk	51.1072095046964/3.98636397573386	BE	Sun Sep 20 2020	Sep	2020	Sep-2020	sigarettenpeuk
8044771	mondmasker	51.1072321338553/3.98628899396031	BE	Sun Sep 20 2020	Sep	2020	Sep-2020	mondmasker
8044769	sigarettenpeuk	51.1072299614884/3.98642514614152	BE	Sun Sep 20 2020	Sep	2020	Sep-2020	sigarettenpeuk
8044768	sigarettenpeuk	51.1072359197222/3.98619819631868	BE	Sun Sep 20 2020	Sep	2020	Sep-2020	sigarettenpeuk
8044767	plastic, afwasmiddel	51.1072387515688/3.9864285787221	BE	Sun Sep 20 2020	Sep	2020	Sep-2020	plastic	afwasmiddel
8044766	sigarettenpeuk	51.1072709031719/3.98637906267777	BE	Sun Sep 20 2020	Sep	2020	Sep-2020	sigarettenpeuk
8044765	sigarettenpeuk	51.107244361969/3.98646169334951	BE	Sun Sep 20 2020	Sep	2020	Sep-2020	sigarettenpeuk
8044764	sigarettenpeuk	51.1070849577903/3.9864737994489	BE	Sun Sep 20 2020	Sep	2020	Sep-2020	sigarettenpeuk
8044763	sigarettenpeuk	51.1068350165467/3.9860823514562	BE	Sun Sep 20 2020	Sep	2020	Sep-2020	sigarettenpeuk
8044762	papieren zakdoek	51.1071095785279/3.98638996078944	BE	Sun Sep 20 2020	Sep	2020	Sep-2020	papieren zakdoek
8024274	plastic, sigarettenpak	51.119857819686/3.99561744012517	BE	Sun Sep 20 2020	Sep	2020	Sep-2020	plastic	sigarettenpak
8024265	snoepverpakking	51.1199138755854/3.99590776408016	BE	Sun Sep 20 2020	Sep	2020	Sep-2020	snoepverpakking
8024264	aluminum, can, cocacola	51.1198550032669/3.9960536404571	BE	Sun Sep 20 2020	Sep	2020	Sep-2020	aluminum	can	cocacola
8024263	hout	51.1199138755854/3.99590776408016	BE	Sun Sep 20 2020	Sep	2020	Sep-2020	hout
8008014	can	50.9564364/4.7321999	BE	Sun Sep 20 2020	Sep	2020	Sep-2020	can
8007861	bag	50.9563563/4.7322744	BE	Sun Sep 20 2020	Sep	2020	Sep-2020	bag
8007212	aluminum	50.9480315/4.7404377	BE	Sun Sep 20 2020	Sep	2020	Sep-2020	aluminum
8007184	beer, aluminum	50.9481575/4.7389585	BE	Sun Sep 20 2020	Sep	2020	Sep-2020	beer	aluminum
8007166	bottle, drink, lipton, plastic	50.9481575/4.7389585	BE	Sun Sep 20 2020	Sep	2020	Sep-2020	bottle	drink	lipton	plastic
8007164	sigarettenpakje	50.9481198/4.7405769	BE	Sun Sep 20 2020	Sep	2020	Sep-2020	sigarettenpakje
8006899	tetrabrik	50.9478064/4.740727	BE	Sun Sep 20 2020	Sep	2020	Sep-2020	tetrabrik
8006710	metal, drink, aluminum, can	50.9478358/4.7407677	BE	Sun Sep 20 2020	Sep	2020	Sep-2020	metal	drink	aluminum	can
8006709	plastic, piece	50.9468964/4.7401233	BE	Sun Sep 20 2020	Sep	2020	Sep-2020	plastic	piece
8006668	paper	50.9470667/4.7389955	BE	Sun Sep 20 2020	Sep	2020	Sep-2020	paper
8006664	cigarette	50.9470207/4.7388756	BE	Sun Sep 20 2020	Sep	2020	Sep-2020	cigarette
8006537	bottle	50.94702/4.7353751	BE	Sun Sep 20 2020	Sep	2020	Sep-2020	bottle
8006419	wrapper	50.947022/4.7353748	BE	Sun Sep 20 2020	Sep	2020	Sep-2020	wrapper
8006383	piece, wrapper	50.947337/4.7335745	BE	Sun Sep 20 2020	Sep	2020	Sep-2020	piece	wrapper
8006323	alcohol, can, aluminum	50.9449499/4.7282059	BE	Sun Sep 20 2020	Sep	2020	Sep-2020	alcohol	can	aluminum
8006322	singleusefacemask	50.9453488/4.7273321	BE	Sun Sep 20 2020	Sep	2020	Sep-2020	singleusefacemask
8006190	piece	50.9454436/4.7271865	BE	Sun Sep 20 2020	Sep	2020	Sep-2020	piece
8006189	paper	50.9454278/4.7272181	BE	Sun Sep 20 2020	Sep	2020	Sep-2020	paper
8006188	bag	50.9453674/4.7271917	BE	Sun Sep 20 2020	Sep	2020	Sep-2020	bag
8006094	wrapper, paper	50.9455882/4.7270235	BE	Sun Sep 20 2020	Sep	2020	Sep-2020	wrapper	paper
8006073	paper	50.9455922/4.727046	BE	Sun Sep 20 2020	Sep	2020	Sep-2020	paper
8006068	wrapper	50.9455814/4.7269193	BE	Sun Sep 20 2020	Sep	2020	Sep-2020	wrapper
8006066	piece, paper, wrapper	50.9458587/4.7266589	BE	Sun Sep 20 2020	Sep	2020	Sep-2020	piece	paper	wrapper
8006037	plastic, bag	50.9465709/4.7255227	BE	Sun Sep 20 2020	Sep	2020	Sep-2020	plastic	bag
8005944	can, metal, smallpiece	50.9475468/4.7237853	BE	Sun Sep 20 2020	Sep	2020	Sep-2020	can	metal	smallpiece
8005915	cigarettepack	50.9476606/4.7238572	BE	Sun Sep 20 2020	Sep	2020	Sep-2020	cigarettepack
8005897	paper	50.948326/4.7231684	BE	Sun Sep 20 2020	Sep	2020	Sep-2020	paper
8005817	paper	50.9482174/4.7232875	BE	Sun Sep 20 2020	Sep	2020	Sep-2020	paper
8005803	plastic	50.9485444/4.7232683	BE	Sun Sep 20 2020	Sep	2020	Sep-2020	plastic
8005793	paper	50.9485346/4.7232668	BE	Sun Sep 20 2020	Sep	2020	Sep-2020	paper
8005790	lighter	50.9496637/4.7227932	BE	Sun Sep 20 2020	Sep	2020	Sep-2020	lighter
8005698	can	50.9496295/4.7227627	BE	Sun Sep 20 2020	Sep	2020	Sep-2020	can
8005456	mouthmask	50.95125/4.7226785	BE	Sun Sep 20 2020	Sep	2020	Sep-2020	mouthmask
8005428	plastic, plasticbottle	50.9529794/4.7192261	BE	Sun Sep 20 2020	Sep	2020	Sep-2020	plastic	plasticbottle
8005402	paper	50.9553319/4.716062	BE	Sun Sep 20 2020	Sep	2020	Sep-2020	paper
8005365	aluminum, can, fanta	50.9547185/4.7175697	BE	Sun Sep 20 2020	Sep	2020	Sep-2020	aluminum	can	fanta
8005343	plastic	50.9551907/4.7163538	BE	Sun Sep 20 2020	Sep	2020	Sep-2020	plastic
8005322	paper, wrapper	50.954976/4.7170455	BE	Sun Sep 20 2020	Sep	2020	Sep-2020	paper	wrapper
8005318	aluminum, cocacola	50.9557641/4.7155816	BE	Sun Sep 20 2020	Sep	2020	Sep-2020	aluminum	cocacola
8005277	plastic	50.9559284/4.7155151	BE	Sun Sep 20 2020	Sep	2020	Sep-2020	plastic
8005251	wood, piece	50.9555286/4.7142477	BE	Sun Sep 20 2020	Sep	2020	Sep-2020	wood	piece
8005241	piece	50.9556149/4.7141683	BE	Sun Sep 20 2020	Sep	2020	Sep-2020	piece
8005224	can, aluminum, energydrink	50.9554581/4.7147528	BE	Sun Sep 20 2020	Sep	2020	Sep-2020	can	aluminum	energydrink
8005223	aluminum, can, jupiler	50.9557273/4.7126284	BE	Sun Sep 20 2020	Sep	2020	Sep-2020	aluminum	can	jupiler
8005210	cigarettebox	50.955725/4.7126308	BE	Sun Sep 20 2020	Sep	2020	Sep-2020	cigarettebox
8005144	can, energydrink	50.9557224/4.7120358	BE	Sun Sep 20 2020	Sep	2020	Sep-2020	can	energydrink
8005032	onderbroek, plastic, bierflesje, kroonkurken	50.9948900342463/3.57034482993518	BE	Sun Sep 20 2020	Sep	2020	Sep-2020	onderbroek	plastic	bierflesje	kroonkurken
8002902	paper	51.0692348243847/3.98294820969168	BE	Sun Sep 20 2020	Sep	2020	Sep-2020	paper
8002901	metal	51.0692306285283/3.98236310094607	BE	Sun Sep 20 2020	Sep	2020	Sep-2020	metal
8002900	metal	51.0672380100643/3.98276408981027	BE	Sun Sep 20 2020	Sep	2020	Sep-2020	metal
8002899	plastic	51.0688804065687/3.98404339139823	BE	Sun Sep 20 2020	Sep	2020	Sep-2020	plastic
8002898	plastic	51.0689099701521/3.98406609614734	BE	Sun Sep 20 2020	Sep	2020	Sep-2020	plastic
8002897	glassbottle	51.0692829275152/3.98312628330108	BE	Sun Sep 20 2020	Sep	2020	Sep-2020	glassbottle
8002896	glassbottle	51.0692829275152/3.98312628330108	BE	Sun Sep 20 2020	Sep	2020	Sep-2020	glassbottle
8002895	plastic	51.069218186289/3.9829080518708	BE	Sun Sep 20 2020	Sep	2020	Sep-2020	plastic
8002894	paper	51.0683430812826/3.98292428329034	BE	Sun Sep 20 2020	Sep	2020	Sep-2020	paper
8002893	plastic	51.069218186289/3.9829080518708	BE	Sun Sep 20 2020	Sep	2020	Sep-2020	plastic
8002892	plastic	51.069218186289/3.9829080518708	BE	Sun Sep 20 2020	Sep	2020	Sep-2020	plastic
8002775	cocacola	51.0693139652077/3.98202901279102	BE	Sun Sep 20 2020	Sep	2020	Sep-2020	cocacola
8002770	cocacola	51.0693263274426/3.98194123107986	BE	Sun Sep 20 2020	Sep	2020	Sep-2020	cocacola
8002769	rope	51.068964021309/3.98427946585946	BE	Sun Sep 20 2020	Sep	2020	Sep-2020	rope
8002768	rope	51.0692827873934/3.98185357722818	BE	Sun Sep 20 2020	Sep	2020	Sep-2020	rope
8002660	paper	51.0680431797615/3.98252083926029	BE	Sun Sep 20 2020	Sep	2020	Sep-2020	paper
8002659	paper	51.0680431797615/3.98252083926029	BE	Sun Sep 20 2020	Sep	2020	Sep-2020	paper
8002652	fanta	51.0692597353173/3.98112729676734	BE	Sun Sep 20 2020	Sep	2020	Sep-2020	fanta
8002651	fanta	51.0692668953759/3.98108299875581	BE	Sun Sep 20 2020	Sep	2020	Sep-2020	fanta
7990289	cigarettepack, plastic, paper	50.9975719631277/3.91485720477889	BE	Sun Sep 20 2020	Sep	2020	Sep-2020	cigarettepack	plastic	paper
7990288	aluminum, can	50.9976316783753/3.91500333262983	BE	Sun Sep 20 2020	Sep	2020	Sep-2020	aluminum	can
7990287	aluminum, can, beer	50.9975495393979/3.91484916610475	BE	Sun Sep 20 2020	Sep	2020	Sep-2020	aluminum	can	beer
7932486	butt, cigarette	50.8813251590656/4.25565936470581	BE	Sat Sep 19 2020	Sep	2020	Sep-2020	butt	cigarette
7916990	aluminum, can, rodeo	51.2486446/4.4338088	BE	Sat Sep 19 2020	Sep	2020	Sep-2020	aluminum	can	rodeo
7912385	celluloseacetate, sigarettenpeuk	51.0581159129431/3.71412606760299	BE	Sat Sep 19 2020	Sep	2020	Sep-2020	celluloseacetate	sigarettenpeuk
7912374	glas	51.0584008482319/3.71407972941084	BE	Sat Sep 19 2020	Sep	2020	Sep-2020	glas
7912371	sigarettenpeuk, celluloseacetate	51.0584352676833/3.71410707852841	BE	Sat Sep 19 2020	Sep	2020	Sep-2020	sigarettenpeuk	celluloseacetate
7912368	celluloseacetate, sigarettenpeuk	51.0584352676833/3.71410707852841	BE	Sat Sep 19 2020	Sep	2020	Sep-2020	celluloseacetate	sigarettenpeuk
7912365	metaal, electricalwire	51.0581868665739/3.71408202415822	BE	Sat Sep 19 2020	Sep	2020	Sep-2020	metaal	electricalwire
7912363	plastic	51.0581168110577/3.71419210528396	BE	Sat Sep 19 2020	Sep	2020	Sep-2020	plastic
7912355	celluloseacetate, sigarettenpeuk	51.0581868665739/3.71408202415822	BE	Sat Sep 19 2020	Sep	2020	Sep-2020	celluloseacetate	sigarettenpeuk
7912346	celluloseacetate, sigarettenpeuk	51.0581034128252/3.71413118634691	BE	Sat Sep 19 2020	Sep	2020	Sep-2020	celluloseacetate	sigarettenpeuk
7912343	celluloseacetate, sigarettenpeuk	51.0581617242941/3.71413326126721	BE	Sat Sep 19 2020	Sep	2020	Sep-2020	celluloseacetate	sigarettenpeuk
7912342	celluloseacetate, sigarettenpeuk	51.058148264335/3.7141055505711	BE	Sat Sep 19 2020	Sep	2020	Sep-2020	celluloseacetate	sigarettenpeuk
7912340	celluloseacetate, sigarettenpeuk	51.0581832975136/3.71416293161053	BE	Sat Sep 19 2020	Sep	2020	Sep-2020	celluloseacetate	sigarettenpeuk
7912336	celluloseacetate, sigarettenpeuk	51.0582220522922/3.71407824045399	BE	Sat Sep 19 2020	Sep	2020	Sep-2020	celluloseacetate	sigarettenpeuk
7912332	celluloseacetate, sigarettenpeuk	51.0582220522922/3.71407824045399	BE	Sat Sep 19 2020	Sep	2020	Sep-2020	celluloseacetate	sigarettenpeuk
7912331	celluloseacetate, sigarettenpeuk	51.0581526773071/3.71408145703026	BE	Sat Sep 19 2020	Sep	2020	Sep-2020	celluloseacetate	sigarettenpeuk
7912328	papier, gent, flyer	51.0581225760038/3.71416163966722	BE	Sat Sep 19 2020	Sep	2020	Sep-2020	papier	gent	flyer
7912327	sigarettenpeuk, celluloseacetate	51.0581526773071/3.71408145703026	BE	Sat Sep 19 2020	Sep	2020	Sep-2020	sigarettenpeuk	celluloseacetate
7909543	metaal, fluvius	51.0580522257519/3.71421489879676	BE	Sat Sep 19 2020	Sep	2020	Sep-2020	metaal	fluvius
7909542	sigarettenpeuk, celluloseacetate	51.0580700038223/3.71421804725061	BE	Sat Sep 19 2020	Sep	2020	Sep-2020	sigarettenpeuk	celluloseacetate
7906204	tomra	50.7613596/4.9430207	BE	Sat Sep 19 2020	Sep	2020	Sep-2020	tomra
7906166	paper	50.7613171/4.9429365	BE	Sat Sep 19 2020	Sep	2020	Sep-2020	paper
7906144	paper	50.7612625/4.9428325	BE	Sat Sep 19 2020	Sep	2020	Sep-2020	paper
7906096	paper	50.7612984/4.9429288	BE	Sat Sep 19 2020	Sep	2020	Sep-2020	paper
7905637	metal	50.761375/4.9429036	BE	Sat Sep 19 2020	Sep	2020	Sep-2020	metal
7902786	metaaldraad, metaal, electricalcable	51.0151947306077/3.73450508596482	BE	Sat Sep 19 2020	Sep	2020	Sep-2020	metaaldraad	metaal	electricalcable
7902785	plastic, strap	51.0151025791406/3.73442866153193	BE	Sat Sep 19 2020	Sep	2020	Sep-2020	plastic	strap
7902784	celluloseacetate, sigarettenpeuk	51.0150541958611/3.73416846999698	BE	Sat Sep 19 2020	Sep	2020	Sep-2020	celluloseacetate	sigarettenpeuk
7902783	metal, top, lit	51.0150649281275/3.73434353407858	BE	Sat Sep 19 2020	Sep	2020	Sep-2020	metal	top	lit
7902782	kauwgom	51.0150733012132/3.73439273064182	BE	Sat Sep 19 2020	Sep	2020	Sep-2020	kauwgom
7902781	sigarettenpeuk	51.0150451718698/3.73461483901692	BE	Sat Sep 19 2020	Sep	2020	Sep-2020	sigarettenpeuk
7902780	kauwgom	51.0151729963029/3.73429363594271	BE	Sat Sep 19 2020	Sep	2020	Sep-2020	kauwgom
7902779	plastic, beschermer	51.0150923977563/3.73437996098312	BE	Sat Sep 19 2020	Sep	2020	Sep-2020	plastic	beschermer
7902778	metal, rondel	51.015091025016/3.73425167017054	BE	Sat Sep 19 2020	Sep	2020	Sep-2020	metal	rondel
7902777	celluloseacetate, sigarettenpeuk	51.0151068754234/3.7342508007931	BE	Sat Sep 19 2020	Sep	2020	Sep-2020	celluloseacetate	sigarettenpeuk
7902776	schuim	51.0151147435971/3.7343458173804	BE	Sat Sep 19 2020	Sep	2020	Sep-2020	schuim
7902775	celluloseacetate, sigarettenpeuk	51.0150163413901/3.73430957699687	BE	Sat Sep 19 2020	Sep	2020	Sep-2020	celluloseacetate	sigarettenpeuk
7902774	plastic, strap	51.014991925758/3.73430325042709	BE	Sat Sep 19 2020	Sep	2020	Sep-2020	plastic	strap
7902773	sigarettenpeuk	51.0150084104863/3.73429931575747	BE	Sat Sep 19 2020	Sep	2020	Sep-2020	sigarettenpeuk
7902772	sigarettenpeuk	51.0150205088559/3.73423449008819	BE	Sat Sep 19 2020	Sep	2020	Sep-2020	sigarettenpeuk
7902771	sigarettenpeuk	51.0150183570765/3.73428487328501	BE	Sat Sep 19 2020	Sep	2020	Sep-2020	sigarettenpeuk
7902770	sigarettenpeuk	51.0149822095401/3.73422538969657	BE	Sat Sep 19 2020	Sep	2020	Sep-2020	sigarettenpeuk
7902769	sigarettenpeuk	51.0149819563268/3.73427497685056	BE	Sat Sep 19 2020	Sep	2020	Sep-2020	sigarettenpeuk
7902768	sigarettenpeuk	51.0150106073709/3.73426112003515	BE	Sat Sep 19 2020	Sep	2020	Sep-2020	sigarettenpeuk
7902767	sigarettenpeuk	51.0145687284372/3.73495750216088	BE	Sat Sep 19 2020	Sep	2020	Sep-2020	sigarettenpeuk
7902765	sigarettenpeuk	51.0145687284372/3.73495750216088	BE	Sat Sep 19 2020	Sep	2020	Sep-2020	sigarettenpeuk
7902763	sigarettenpeuk	51.0146803722939/3.73417227123894	BE	Sat Sep 19 2020	Sep	2020	Sep-2020	sigarettenpeuk
7902762	kauwgom	51.0146803722939/3.73417227123894	BE	Sat Sep 19 2020	Sep	2020	Sep-2020	kauwgom
7902761	strap, plastic	51.0146360037802/3.73420611293205	BE	Sat Sep 19 2020	Sep	2020	Sep-2020	strap	plastic
7902759	sigarettenpeuk	51.014581380971/3.73421393002843	BE	Sat Sep 19 2020	Sep	2020	Sep-2020	sigarettenpeuk
7902758	hout	51.0145709270088/3.73419823260564	BE	Sat Sep 19 2020	Sep	2020	Sep-2020	hout
7902756	sigarettenpeuk	51.014552188768/3.73423280882725	BE	Sat Sep 19 2020	Sep	2020	Sep-2020	sigarettenpeuk
7902755	sigarettenpeuk	51.0145374637628/3.73424377021221	BE	Sat Sep 19 2020	Sep	2020	Sep-2020	sigarettenpeuk
7902754	sigarettenpeuk	51.0144977872344/3.73428813037169	BE	Sat Sep 19 2020	Sep	2020	Sep-2020	sigarettenpeuk
7902753	sigarettenpeuk	51.0144832644678/3.73436248775675	BE	Sat Sep 19 2020	Sep	2020	Sep-2020	sigarettenpeuk
7902751	sigarettenpeuk	51.0144913052051/3.73443286488586	BE	Sat Sep 19 2020	Sep	2020	Sep-2020	sigarettenpeuk
7902748	sigarettenpeuk	51.0144407066523/3.73447750363014	BE	Sat Sep 19 2020	Sep	2020	Sep-2020	sigarettenpeuk
7902747	sigarettenpeuk	51.0144570264712/3.73447186942656	BE	Sat Sep 19 2020	Sep	2020	Sep-2020	sigarettenpeuk
7902745	sigarettenpeuk	51.0144239551795/3.73447991029581	BE	Sat Sep 19 2020	Sep	2020	Sep-2020	sigarettenpeuk
7902744	sigarettenpeuk	51.0143840320902/3.73446387610274	BE	Sat Sep 19 2020	Sep	2020	Sep-2020	sigarettenpeuk
7902743	sigarettenpeuk	51.0143926604031/3.73448225013592	BE	Sat Sep 19 2020	Sep	2020	Sep-2020	sigarettenpeuk
7902742	sigarettenpeuk	51.0143950910846/3.73448018493084	BE	Sat Sep 19 2020	Sep	2020	Sep-2020	sigarettenpeuk
7902741	sigarettenpeuk	51.0144037738146/3.73447128188166	BE	Sat Sep 19 2020	Sep	2020	Sep-2020	sigarettenpeuk
7902739	metaal	51.0143714507368/3.73443599375543	BE	Sat Sep 19 2020	Sep	2020	Sep-2020	metaal
7902738	sigarettenpeuk	51.0143941727252/3.73446414445514	BE	Sat Sep 19 2020	Sep	2020	Sep-2020	sigarettenpeuk
7902737	sigarettenpeuk	51.014401697061/3.73442212999788	BE	Sat Sep 19 2020	Sep	2020	Sep-2020	sigarettenpeuk
7902736	sigarettenpeuk	51.0144631993255/3.73443373603983	BE	Sat Sep 19 2020	Sep	2020	Sep-2020	sigarettenpeuk
7902734	sigarettenpeuk	51.0144781069917/3.73399977012882	BE	Sat Sep 19 2020	Sep	2020	Sep-2020	sigarettenpeuk
7902733	sigarettenpeuk	51.014460628905/3.73394518568067	BE	Sat Sep 19 2020	Sep	2020	Sep-2020	sigarettenpeuk
7902732	sigarettenpeuk	51.0151519094549/3.73414491091902	BE	Sat Sep 19 2020	Sep	2020	Sep-2020	sigarettenpeuk
7902731	sigarettenpeuk	51.0151519094549/3.73414491091902	BE	Sat Sep 19 2020	Sep	2020	Sep-2020	sigarettenpeuk
7902729	sigarettenpeuk	51.0151519094549/3.73414491091902	BE	Sat Sep 19 2020	Sep	2020	Sep-2020	sigarettenpeuk
7902728	hout, ijsstokje	51.0150518210732/3.73422829151265	BE	Sat Sep 19 2020	Sep	2020	Sep-2020	hout	ijsstokje
7902727	metaal	51.0149965206079/3.73422278975309	BE	Sat Sep 19 2020	Sep	2020	Sep-2020	metaal
7902726	garen, bobijn	51.0149714793234/3.73417224928003	BE	Sat Sep 19 2020	Sep	2020	Sep-2020	garen	bobijn
7902725	sigarettenpeuk	51.0149969143787/3.73415911650588	BE	Sat Sep 19 2020	Sep	2020	Sep-2020	sigarettenpeuk
7902724	sigarettenpeuk	51.0149930815797/3.73416470368464	BE	Sat Sep 19 2020	Sep	2020	Sep-2020	sigarettenpeuk
7902723	sigarettenpeuk	51.0149906337244/3.73416675498325	BE	Sat Sep 19 2020	Sep	2020	Sep-2020	sigarettenpeuk
7902722	sigarettenpeuk	51.0149969917581/3.73417310184416	BE	Sat Sep 19 2020	Sep	2020	Sep-2020	sigarettenpeuk
7902721	sigarettenpeuk	51.0149463890339/3.73413948067343	BE	Sat Sep 19 2020	Sep	2020	Sep-2020	sigarettenpeuk
7902719	sigarettenpeuk	51.0149392030522/3.73415092841083	BE	Sat Sep 19 2020	Sep	2020	Sep-2020	sigarettenpeuk
7902718	ducttape	51.0146966809448/3.73383701512987	BE	Sat Sep 19 2020	Sep	2020	Sep-2020	ducttape
7902715	sigarettenpeuk	51.0150254057803/3.73399866256222	BE	Sat Sep 19 2020	Sep	2020	Sep-2020	sigarettenpeuk
7902714	plastic, folie	51.0146984922044/3.73388478835476	BE	Sat Sep 19 2020	Sep	2020	Sep-2020	plastic	folie
7902713	hout	51.0149253006171/3.73414520833301	BE	Sat Sep 19 2020	Sep	2020	Sep-2020	hout
7902712	snoepverpakking, lu	51.0147673922977/3.73387384510644	BE	Sat Sep 19 2020	Sep	2020	Sep-2020	snoepverpakking	lu
7902711	verpakkingsmateriaal, sunrise	51.0149236739521/3.73405500682185	BE	Sat Sep 19 2020	Sep	2020	Sep-2020	verpakkingsmateriaal	sunrise
7902710	sigarettenpeuk	51.0149735684967/3.73387951981441	BE	Sat Sep 19 2020	Sep	2020	Sep-2020	sigarettenpeuk
7902709	sigarettenpeuk	51.0149029600549/3.73404227047181	BE	Sat Sep 19 2020	Sep	2020	Sep-2020	sigarettenpeuk
7902708	sigarettenpeuk	51.0149379210586/3.73374637836272	BE	Sat Sep 19 2020	Sep	2020	Sep-2020	sigarettenpeuk
7902707	blikje, aluminum, pepsi	51.0149962897997/3.73394066791332	BE	Sat Sep 19 2020	Sep	2020	Sep-2020	blikje	aluminum	pepsi
7902706	paper	51.0147571436514/3.73359603558137	BE	Sat Sep 19 2020	Sep	2020	Sep-2020	paper
7902705	paper, rekening	51.0147938712595/3.73357954770636	BE	Sat Sep 19 2020	Sep	2020	Sep-2020	paper	rekening
7902704	sigarettenpeuk	51.0151311702462/3.73383809262211	BE	Sat Sep 19 2020	Sep	2020	Sep-2020	sigarettenpeuk
7902703	sigarettenpeuk	51.0149724053216/3.73375255968147	BE	Sat Sep 19 2020	Sep	2020	Sep-2020	sigarettenpeuk
7902702	paper, rekening	51.0150621026147/3.73389889136816	BE	Sat Sep 19 2020	Sep	2020	Sep-2020	paper	rekening
7902701	sigarettenpeuk	51.0150813138765/3.73390549718949	BE	Sat Sep 19 2020	Sep	2020	Sep-2020	sigarettenpeuk
7902700	sigarettenpeuk	51.0151188235314/3.733815950524	BE	Sat Sep 19 2020	Sep	2020	Sep-2020	sigarettenpeuk
7902696	sigarettenpeuk	51.0147911226768/3.73474829157192	BE	Sat Sep 19 2020	Sep	2020	Sep-2020	sigarettenpeuk
7902694	sigarettenpeuk	51.0150893895174/3.73388306449647	BE	Sat Sep 19 2020	Sep	2020	Sep-2020	sigarettenpeuk
7902692	sigarettenpeuk	51.0151006961769/3.73382714691466	BE	Sat Sep 19 2020	Sep	2020	Sep-2020	sigarettenpeuk
7902691	sigarettenpeuk	51.015107538165/3.73381284268927	BE	Sat Sep 19 2020	Sep	2020	Sep-2020	sigarettenpeuk
7902685	sigarettenpeuk	51.0148201387932/3.73405121786123	BE	Sat Sep 19 2020	Sep	2020	Sep-2020	sigarettenpeuk
7902684	paper, rekening	51.0148830782458/3.73375848857884	BE	Sat Sep 19 2020	Sep	2020	Sep-2020	paper	rekening
7902681	verpakkingsmateriaal, plastic, flos	51.0148855645485/3.73381511918596	BE	Sat Sep 19 2020	Sep	2020	Sep-2020	verpakkingsmateriaal	plastic	flos
7902680	paper, nota	51.0148201387932/3.73405121786123	BE	Sat Sep 19 2020	Sep	2020	Sep-2020	paper	nota
7902676	metaal	51.0151424739526/3.73404580366395	BE	Sat Sep 19 2020	Sep	2020	Sep-2020	metaal
7892462	karton	51.0736881/4.0425466	BE	Sat Sep 19 2020	Sep	2020	Sep-2020	karton
7872302	plastic	51.1297212215888/5.5150815956619	BE	Sat Sep 19 2020	Sep	2020	Sep-2020	plastic
7872072	drinkcarton	51.1298577876482/5.5157207368132	BE	Sat Sep 19 2020	Sep	2020	Sep-2020	drinkcarton
7871697	bag	51.1296716469235/5.51587506513227	BE	Sat Sep 19 2020	Sep	2020	Sep-2020	bag
7871696	bottle, plasticbottle, waterbottle	51.1296124845347/5.51610021471627	BE	Sat Sep 19 2020	Sep	2020	Sep-2020	bottle	plasticbottle	waterbottle
7871690	aluminum	51.1296826584379/5.51581021522042	BE	Sat Sep 19 2020	Sep	2020	Sep-2020	aluminum
7871677	wrapper	51.1297059476178/5.51604436841434	BE	Sat Sep 19 2020	Sep	2020	Sep-2020	wrapper
7871270	aluminum	51.1295820604486/5.51676163904826	BE	Sat Sep 19 2020	Sep	2020	Sep-2020	aluminum
7871269	cigarette, pack	51.1295387779217/5.51686664099099	BE	Sat Sep 19 2020	Sep	2020	Sep-2020	cigarette	pack
7871268	energydrink	51.1295421596966/5.51686234001765	BE	Sat Sep 19 2020	Sep	2020	Sep-2020	energydrink
7871267	piece	51.1295624280304/5.5163510734366	BE	Sat Sep 19 2020	Sep	2020	Sep-2020	piece
7871265	plastic	51.1294537394162/5.51671626453934	BE	Sat Sep 19 2020	Sep	2020	Sep-2020	plastic
7871264	paper	51.1295356746447/5.51642374802104	BE	Sat Sep 19 2020	Sep	2020	Sep-2020	paper
7871263	metal	51.1295264340612/5.5168675793867	BE	Sat Sep 19 2020	Sep	2020	Sep-2020	metal
7871262	bottle	51.1298257563038/5.51601416977031	BE	Sat Sep 19 2020	Sep	2020	Sep-2020	bottle
7870992	blik	51.1241663/5.5093881	BE	Sat Sep 19 2020	Sep	2020	Sep-2020	blik
7870749	cup	51.1295052100196/5.5170113869421	BE	Sat Sep 19 2020	Sep	2020	Sep-2020	cup
7870748	plastic	51.1294692580216/5.51730689223013	BE	Sat Sep 19 2020	Sep	2020	Sep-2020	plastic
7870747	metal	51.1294530500198/5.51779443311979	BE	Sat Sep 19 2020	Sep	2020	Sep-2020	metal
7870746	wrapper	51.1294283379533/5.51759821056294	BE	Sat Sep 19 2020	Sep	2020	Sep-2020	wrapper
7870742	bag	51.1295431747767/5.51720828721546	BE	Sat Sep 19 2020	Sep	2020	Sep-2020	bag
7870741	candywrapper	51.129414676224/5.51719263016629	BE	Sat Sep 19 2020	Sep	2020	Sep-2020	candywrapper
7870739	energydrink	51.1295431747767/5.51720828721546	BE	Sat Sep 19 2020	Sep	2020	Sep-2020	energydrink
7870737	cup	51.1302723936849/5.52014529473003	BE	Sat Sep 19 2020	Sep	2020	Sep-2020	cup
7868973	plastic	51.1300615801665/5.52213300057155	BE	Sat Sep 19 2020	Sep	2020	Sep-2020	plastic
7868955	metal	51.1300807709206/5.52347119848545	BE	Sat Sep 19 2020	Sep	2020	Sep-2020	metal
7866905	paper	51.1300851875679/5.52446823952728	BE	Sat Sep 19 2020	Sep	2020	Sep-2020	paper
7866904	candy	51.1299874303372/5.52470675148338	BE	Sat Sep 19 2020	Sep	2020	Sep-2020	candy
7865937	cigarette	51.1286746286887/5.52416161680117	BE	Sat Sep 19 2020	Sep	2020	Sep-2020	cigarette
7865935	cigarette	51.1289701352816/5.52436122367847	BE	Sat Sep 19 2020	Sep	2020	Sep-2020	cigarette
7865918	cigarettebutt	51.1289524719084/5.52434847575516	BE	Sat Sep 19 2020	Sep	2020	Sep-2020	cigarettebutt
7865916	cigarette, piece	51.129124803795/5.52444625528228	BE	Sat Sep 19 2020	Sep	2020	Sep-2020	cigarette	piece
7865914	cigarette	51.129124803795/5.52444625528228	BE	Sat Sep 19 2020	Sep	2020	Sep-2020	cigarette
7865903	cigarette	51.1291484450486/5.52448100067506	BE	Sat Sep 19 2020	Sep	2020	Sep-2020	cigarette
7865900	cigarette	51.1286938321355/5.52414330751096	BE	Sat Sep 19 2020	Sep	2020	Sep-2020	cigarette
7865898	cigarettebutt	51.1284550938783/5.52400431853793	BE	Sat Sep 19 2020	Sep	2020	Sep-2020	cigarettebutt
7862339	chaudfontaine	51.1265776434032/5.51528507722494	BE	Sat Sep 19 2020	Sep	2020	Sep-2020	chaudfontaine
7862338	piece	51.1280915048192/5.51762294372524	BE	Sat Sep 19 2020	Sep	2020	Sep-2020	piece
7859943	energydrink	51.126531873725/5.51529775964881	BE	Sat Sep 19 2020	Sep	2020	Sep-2020	energydrink
7859942	plasticlid	51.1262636746567/5.51456617959721	BE	Sat Sep 19 2020	Sep	2020	Sep-2020	plasticlid
7859941	plastic	51.1265364750451/5.51502234364072	BE	Sat Sep 19 2020	Sep	2020	Sep-2020	plastic
7859940	bag	51.1260042009313/5.51396370332898	BE	Sat Sep 19 2020	Sep	2020	Sep-2020	bag
7859488	metal	51.1258099398804/5.51344928676491	BE	Sat Sep 19 2020	Sep	2020	Sep-2020	metal
7859487	plastic	51.1258413560283/5.51303559870938	BE	Sat Sep 19 2020	Sep	2020	Sep-2020	plastic
7859486	plastic, paper	51.1258690320637/5.51283964731303	BE	Sat Sep 19 2020	Sep	2020	Sep-2020	plastic	paper
7858781	blik	51.1300828/5.5235495	BE	Sat Sep 19 2020	Sep	2020	Sep-2020	blik
7858640	bottle	51.1272307/5.5165353	BE	Sat Sep 19 2020	Sep	2020	Sep-2020	bottle
7857332	metal	51.1248533067052/5.51041004474982	BE	Sat Sep 19 2020	Sep	2020	Sep-2020	metal
7857331	paper	51.1240121283162/5.50961613600042	BE	Sat Sep 19 2020	Sep	2020	Sep-2020	paper
7857329	aluminum, beer	51.1244305222119/5.51071585981204	BE	Sat Sep 19 2020	Sep	2020	Sep-2020	aluminum	beer
7857326	beer	51.1254219055078/5.51253173595041	BE	Sat Sep 19 2020	Sep	2020	Sep-2020	beer
7857324	cardboard	51.1243201665406/5.5093583385296	BE	Sat Sep 19 2020	Sep	2020	Sep-2020	cardboard
7857318	plastic	51.1239538817685/5.50614134078925	BE	Sat Sep 19 2020	Sep	2020	Sep-2020	plastic
7857022	bottle	51.1297988/5.5194844	BE	Sat Sep 19 2020	Sep	2020	Sep-2020	bottle
7856924	can	51.1297689/5.5195326	BE	Sat Sep 19 2020	Sep	2020	Sep-2020	can
7856857	can	51.1297433/5.5190827	BE	Sat Sep 19 2020	Sep	2020	Sep-2020	can
7856486	can	51.1297646/5.5190544	BE	Sat Sep 19 2020	Sep	2020	Sep-2020	can
7856454	can	51.1272307/5.5165353	BE	Sat Sep 19 2020	Sep	2020	Sep-2020	can
7853716	beer, metal	51.1241162402245/5.5050631351876	BE	Sat Sep 19 2020	Sep	2020	Sep-2020	beer	metal
7853715	metal, beer	51.1244105574815/5.50483730301872	BE	Sat Sep 19 2020	Sep	2020	Sep-2020	metal	beer
7853713	plastic	51.1236252677513/5.50613289625424	BE	Sat Sep 19 2020	Sep	2020	Sep-2020	plastic
7853712	metal	51.1245297188618/5.50443841901712	BE	Sat Sep 19 2020	Sep	2020	Sep-2020	metal
7853711	redbull	51.1240181880104/5.50515501261155	BE	Sat Sep 19 2020	Sep	2020	Sep-2020	redbull
7853710	wrapper	51.1249449360642/5.50361441192872	BE	Sat Sep 19 2020	Sep	2020	Sep-2020	wrapper
7852993	can, energydrink	51.1317437/5.5155161	BE	Sat Sep 19 2020	Sep	2020	Sep-2020	can	energydrink
7852025	can, soda	51.1298707/5.5128669	BE	Sat Sep 19 2020	Sep	2020	Sep-2020	can	soda
7851818	aluminum	51.1259063410386/5.50040867495902	BE	Sat Sep 19 2020	Sep	2020	Sep-2020	aluminum
7851817	paper	51.1255788591075/5.50212911253545	BE	Sat Sep 19 2020	Sep	2020	Sep-2020	paper
7851816	cup, coffee, bruno, food, corner	51.1257872311497/5.50068547211117	BE	Sat Sep 19 2020	Sep	2020	Sep-2020	cup	coffee	bruno	food	corner
7851813	cup, plastic	51.1258422792676/5.50035134462324	BE	Sat Sep 19 2020	Sep	2020	Sep-2020	cup	plastic
7851812	plastic	51.1251134202999/5.50167230314175	BE	Sat Sep 19 2020	Sep	2020	Sep-2020	plastic
7851810	plastic	51.1249634371123/5.50323206803396	BE	Sat Sep 19 2020	Sep	2020	Sep-2020	plastic
7851809	fanta	51.1260505166772/5.50094541689339	BE	Sat Sep 19 2020	Sep	2020	Sep-2020	fanta
7851751	can, beer	51.1299098/5.513146	BE	Sat Sep 19 2020	Sep	2020	Sep-2020	can	beer
7850793	mondmasker	51.1311451/5.5095342	BE	Sat Sep 19 2020	Sep	2020	Sep-2020	mondmasker
7850476	aluminum	51.126555406654/5.50117376652853	BE	Sat Sep 19 2020	Sep	2020	Sep-2020	aluminum
7850474	energydrink	51.1265801975724/5.50087479874971	BE	Sat Sep 19 2020	Sep	2020	Sep-2020	energydrink
7850470	metal, beer	51.1266352186279/5.50092372733047	BE	Sat Sep 19 2020	Sep	2020	Sep-2020	metal	beer
7850468	metal	51.126188137729/5.50026719909932	BE	Sat Sep 19 2020	Sep	2020	Sep-2020	metal
7850467	aluminum, coke, cocacola	51.1267718868109/5.50102786736935	BE	Sat Sep 19 2020	Sep	2020	Sep-2020	aluminum	coke	cocacola
7849883	coffee, plastic	51.1278302259694/5.50074049189732	BE	Sat Sep 19 2020	Sep	2020	Sep-2020	coffee	plastic
7849882	paper, tissue	51.1273750185643/5.50078215127327	BE	Sat Sep 19 2020	Sep	2020	Sep-2020	paper	tissue
7849881	wrapper	51.1271967264825/5.50077902725874	BE	Sat Sep 19 2020	Sep	2020	Sep-2020	wrapper
7849880	candy, wrapper, haribo	51.127595772829/5.50075813083345	BE	Sat Sep 19 2020	Sep	2020	Sep-2020	candy	wrapper	haribo
7849878	plastic, coffee	51.1276039814851/5.50140131206879	BE	Sat Sep 19 2020	Sep	2020	Sep-2020	plastic	coffee
7849877	plastic	51.127093687926/5.50092926179152	BE	Sat Sep 19 2020	Sep	2020	Sep-2020	plastic
7849876	metal, pepsimax	51.127393219946/5.50082622265083	BE	Sat Sep 19 2020	Sep	2020	Sep-2020	metal	pepsimax
7849875	bottle, plastic	51.1271763672293/5.50070578017191	BE	Sat Sep 19 2020	Sep	2020	Sep-2020	bottle	plastic
7849874	plastic	51.1275470426517/5.50117562650878	BE	Sat Sep 19 2020	Sep	2020	Sep-2020	plastic
7849213	bottle	51.1338526/5.5046254	BE	Sat Sep 19 2020	Sep	2020	Sep-2020	bottle
7849193	coke, metal	51.1294081387061/5.50051354599021	BE	Sat Sep 19 2020	Sep	2020	Sep-2020	coke	metal
7849192	plastic	51.128149877065/5.5006055460016	BE	Sat Sep 19 2020	Sep	2020	Sep-2020	plastic
7849191	energydrink	51.1291272706271/5.5010879864814	BE	Sat Sep 19 2020	Sep	2020	Sep-2020	energydrink
7849190	cigarette	51.1291954699303/5.50051092238239	BE	Sat Sep 19 2020	Sep	2020	Sep-2020	cigarette
7849189	wrapper	51.1280020677303/5.50066181649528	BE	Sat Sep 19 2020	Sep	2020	Sep-2020	wrapper
7849188	coca cola blikje	51.1281107755361/5.50107532016843	BE	Sat Sep 19 2020	Sep	2020	Sep-2020	coca cola blikje
7849187	sprite, aluminum	51.1289152019167/5.50060252597987	BE	Sat Sep 19 2020	Sep	2020	Sep-2020	sprite	aluminum
7849184	alcohol, glass, bottle	51.1291959931909/5.50045791528984	BE	Sat Sep 19 2020	Sep	2020	Sep-2020	alcohol	glass	bottle
7849155	can	51.1325399/5.5042712	BE	Sat Sep 19 2020	Sep	2020	Sep-2020	can
7849072	medicine	51.1325812/5.5039054	BE	Sat Sep 19 2020	Sep	2020	Sep-2020	medicine
7848731	cloths	51.1326118/5.5039383	BE	Sat Sep 19 2020	Sep	2020	Sep-2020	cloths
7848610	metal, beer	51.1292169781495/5.50034533973223	BE	Sat Sep 19 2020	Sep	2020	Sep-2020	metal	beer
7848609	energy drink	51.1292448693049/5.50113085464772	BE	Sat Sep 19 2020	Sep	2020	Sep-2020	energy drink
7848222	bottle, sprite, glass	51.1294698263665/5.50117350107321	BE	Sat Sep 19 2020	Sep	2020	Sep-2020	bottle	sprite	glass
7848221	paper, tissue	51.1293004699754/5.50085008373895	BE	Sat Sep 19 2020	Sep	2020	Sep-2020	paper	tissue
7848220	plastic	51.1294778765107/5.50120259197008	BE	Sat Sep 19 2020	Sep	2020	Sep-2020	plastic
7848219	paper, tissue	51.1292465077199/5.50049994554997	BE	Sat Sep 19 2020	Sep	2020	Sep-2020	paper	tissue
7848218	aluminum, beer	51.1292606570628/5.50045730394936	BE	Sat Sep 19 2020	Sep	2020	Sep-2020	aluminum	beer
7848217	cup, plastic	51.1292693201788/5.50043069166856	BE	Sat Sep 19 2020	Sep	2020	Sep-2020	cup	plastic
7848216	aluminum, redbull	51.1292705181985/5.50041536397516	BE	Sat Sep 19 2020	Sep	2020	Sep-2020	aluminum	redbull
7848215	nescafe gold, plastic	51.1292097428577/5.50047749269221	BE	Sat Sep 19 2020	Sep	2020	Sep-2020	nescafe gold	plastic
7848214	paper	51.1293004699754/5.50085008373895	BE	Sat Sep 19 2020	Sep	2020	Sep-2020	paper
7848213	plastic	51.1292578774963/5.50047935982623	BE	Sat Sep 19 2020	Sep	2020	Sep-2020	plastic
7848211	aluminum, redbull	51.1293947347418/5.50116217087729	BE	Sat Sep 19 2020	Sep	2020	Sep-2020	aluminum	redbull
7847981	aluminum, cocacola	51.1294260599067/5.50121316120256	BE	Sat Sep 19 2020	Sep	2020	Sep-2020	aluminum	cocacola
7847980	beer, metal	51.1296047757265/5.50116939847467	BE	Sat Sep 19 2020	Sep	2020	Sep-2020	beer	metal
7847847	can	51.131466/5.5026832	BE	Sat Sep 19 2020	Sep	2020	Sep-2020	can
7847783	energy drink, metal	51.1299651839238/5.50116865124698	BE	Sat Sep 19 2020	Sep	2020	Sep-2020	energy drink	metal
7847782	plastic	51.1300233943855/5.50149551781143	BE	Sat Sep 19 2020	Sep	2020	Sep-2020	plastic
7847170	wrapper, plastic	50.99461167/3.09244717	BE	Sat Sep 19 2020	Sep	2020	Sep-2020	wrapper	plastic
7847169	isolationmaterial	50.99460333/3.09248333	BE	Sat Sep 19 2020	Sep	2020	Sep-2020	isolationmaterial
7847168	plastic, wrapper, chipszak	50.99462833/3.09242783	BE	Sat Sep 19 2020	Sep	2020	Sep-2020	plastic	wrapper	chipszak
7847167	plastic	51.1302167012458/5.5012426392477	BE	Sat Sep 19 2020	Sep	2020	Sep-2020	plastic
7847165	plastic	50.994605/3.092625	BE	Sat Sep 19 2020	Sep	2020	Sep-2020	plastic
7847164	plastic	51.1301773621402/5.50121128834157	BE	Sat Sep 19 2020	Sep	2020	Sep-2020	plastic
7847163	plastic	51.1305706378561/5.50157815056387	BE	Sat Sep 19 2020	Sep	2020	Sep-2020	plastic
7847161	plastic, bottle, water, drink, spa	50.994555/3.0926805	BE	Sat Sep 19 2020	Sep	2020	Sep-2020	plastic	bottle	water	drink	spa
7847160	plastic, wrapper	50.994645/3.0924305	BE	Sat Sep 19 2020	Sep	2020	Sep-2020	plastic	wrapper
7847158	mondmasker	50.994655/3.09242783	BE	Sat Sep 19 2020	Sep	2020	Sep-2020	mondmasker
7847157	mouthcap	50.994525/3.09264167	BE	Sat Sep 19 2020	Sep	2020	Sep-2020	mouthcap
7847156	can, metal, blikje	50.99465333/3.09242783	BE	Sat Sep 19 2020	Sep	2020	Sep-2020	can	metal	blikje
7847155	plastic	50.99451333/3.0927055	BE	Sat Sep 19 2020	Sep	2020	Sep-2020	plastic
7847153	plastic	50.99451333/3.0927055	BE	Sat Sep 19 2020	Sep	2020	Sep-2020	plastic
7847152	plastic, chipsbag	50.99449167/3.092675	BE	Sat Sep 19 2020	Sep	2020	Sep-2020	plastic	chipsbag
7847151	glasswool	50.99473/3.09231383	BE	Sat Sep 19 2020	Sep	2020	Sep-2020	glasswool
7847149	plastic, wrapper	50.99473/3.09232217	BE	Sat Sep 19 2020	Sep	2020	Sep-2020	plastic	wrapper
7847147	bottle, water, plastic	50.99447/3.09267783	BE	Sat Sep 19 2020	Sep	2020	Sep-2020	bottle	water	plastic
7847146	can, blikje	50.99473/3.09232217	BE	Sat Sep 19 2020	Sep	2020	Sep-2020	can	blikje
7847145	glove, fabric	50.99448/3.09280833	BE	Sat Sep 19 2020	Sep	2020	Sep-2020	glove	fabric
7847144	bottle, plastic, water	50.99447/3.09267783	BE	Sat Sep 19 2020	Sep	2020	Sep-2020	bottle	plastic	water
7847143	plastic	50.99473/3.09229167	BE	Sat Sep 19 2020	Sep	2020	Sep-2020	plastic
7847142	aluminum, can, blikje	50.99473667/3.09226383	BE	Sat Sep 19 2020	Sep	2020	Sep-2020	aluminum	can	blikje
7847141	chipsbag	50.99448333/3.09273883	BE	Sat Sep 19 2020	Sep	2020	Sep-2020	chipsbag
7847140	paper, tissue	50.99448833/3.09278883	BE	Sat Sep 19 2020	Sep	2020	Sep-2020	paper	tissue
7847138	wrapper, plastic, chipsbag	50.99448333/3.09273883	BE	Sat Sep 19 2020	Sep	2020	Sep-2020	wrapper	plastic	chipsbag
7847136	blikje	50.99473833/3.09225	BE	Sat Sep 19 2020	Sep	2020	Sep-2020	blikje
7847135	bag, plastic	50.994475/3.09282217	BE	Sat Sep 19 2020	Sep	2020	Sep-2020	bag	plastic
7847134	nylon rope	50.99446167/3.09283883	BE	Sat Sep 19 2020	Sep	2020	Sep-2020	nylon rope
7847133	cup, plastic	50.99445/3.09277783	BE	Sat Sep 19 2020	Sep	2020	Sep-2020	cup	plastic
7847132	afzetlint	50.99474667/3.09223617	BE	Sat Sep 19 2020	Sep	2020	Sep-2020	afzetlint
7847131	wrapper, plastic	50.99456167/3.0928445	BE	Sat Sep 19 2020	Sep	2020	Sep-2020	wrapper	plastic
7847129	cup, plastic	50.994575/3.09283617	BE	Sat Sep 19 2020	Sep	2020	Sep-2020	cup	plastic
7847128	bottlecap, plastic	50.99465833/3.09281667	BE	Sat Sep 19 2020	Sep	2020	Sep-2020	bottlecap	plastic
7847127	plastic	50.994595/3.09281383	BE	Sat Sep 19 2020	Sep	2020	Sep-2020	plastic
7847123	plastic, piece	50.99477833/3.09264167	BE	Sat Sep 19 2020	Sep	2020	Sep-2020	plastic	piece
7847121	cigarettebox, cigarettepack, marlboro	50.99445/3.092775	BE	Sat Sep 19 2020	Sep	2020	Sep-2020	cigarettebox	cigarettepack	marlboro
7847118	afzetlint	50.99474667/3.09220283	BE	Sat Sep 19 2020	Sep	2020	Sep-2020	afzetlint
7847117	plastic, wrapper	50.99473667/3.092125	BE	Sat Sep 19 2020	Sep	2020	Sep-2020	plastic	wrapper
7847115	plastic, bottlecap	50.99443/3.09275	BE	Sat Sep 19 2020	Sep	2020	Sep-2020	plastic	bottlecap
7847114	plastic	50.99446333/3.09272783	BE	Sat Sep 19 2020	Sep	2020	Sep-2020	plastic
7847113	glasswool	50.99473/3.09214167	BE	Sat Sep 19 2020	Sep	2020	Sep-2020	glasswool
7847107	plastic, wrapper	50.99442167/3.0926945	BE	Sat Sep 19 2020	Sep	2020	Sep-2020	plastic	wrapper
7847104	plastic	50.99477833/3.0920805	BE	Sat Sep 19 2020	Sep	2020	Sep-2020	plastic
7847103	aluminum, can, cocacola	50.99473/3.09213883	BE	Sat Sep 19 2020	Sep	2020	Sep-2020	aluminum	can	cocacola
7847092	afzetlint, plastic	50.9944/3.0926945	BE	Sat Sep 19 2020	Sep	2020	Sep-2020	afzetlint	plastic
7847090	plastic, plasticwrapper	50.99441667/3.0926695	BE	Sat Sep 19 2020	Sep	2020	Sep-2020	plastic	plasticwrapper
7847089	glasswool	50.994745/3.092175	BE	Sat Sep 19 2020	Sep	2020	Sep-2020	glasswool
7847087	plastic, plasticbottle	50.994745/3.09218883	BE	Sat Sep 19 2020	Sep	2020	Sep-2020	plastic	plasticbottle
7847086	rood-wit afzettape, plastic	50.99441167/3.09267217	BE	Sat Sep 19 2020	Sep	2020	Sep-2020	rood-wit afzettape	plastic
7847085	bottle, plastic	50.994745/3.09218617	BE	Sat Sep 19 2020	Sep	2020	Sep-2020	bottle	plastic
7847083	cigarette	50.9944/3.09253617	BE	Sat Sep 19 2020	Sep	2020	Sep-2020	cigarette
7847082	chipsbag, plastic	50.99472833/3.092175	BE	Sat Sep 19 2020	Sep	2020	Sep-2020	chipsbag	plastic
7847081	afzetlint	50.99438833/3.0926	BE	Sat Sep 19 2020	Sep	2020	Sep-2020	afzetlint
7847080	plastic, afzetlint	50.99438833/3.0926	BE	Sat Sep 19 2020	Sep	2020	Sep-2020	plastic	afzetlint
7847079	alluminium wrap	50.99471667/3.09216383	BE	Sat Sep 19 2020	Sep	2020	Sep-2020	alluminium wrap
7847077	paper	50.99471333/3.09216117	BE	Sat Sep 19 2020	Sep	2020	Sep-2020	paper
7847072	plastic, cup	50.99471333/3.09216117	BE	Sat Sep 19 2020	Sep	2020	Sep-2020	plastic	cup
7847068	glasswool	50.9947/3.09215	BE	Sat Sep 19 2020	Sep	2020	Sep-2020	glasswool
7847061	plastic, bag	50.99433/3.0925555	BE	Sat Sep 19 2020	Sep	2020	Sep-2020	plastic	bag
7847060	plastic	50.99433/3.09253883	BE	Sat Sep 19 2020	Sep	2020	Sep-2020	plastic
7847058	paper	50.99471333/3.09216117	BE	Sat Sep 19 2020	Sep	2020	Sep-2020	paper
7847057	plastic	50.99432833/3.09253333	BE	Sat Sep 19 2020	Sep	2020	Sep-2020	plastic
7847056	plastic	50.99432833/3.09253333	BE	Sat Sep 19 2020	Sep	2020	Sep-2020	plastic
7847055	plastic	50.99433667/3.0925	BE	Sat Sep 19 2020	Sep	2020	Sep-2020	plastic
7847054	candywrapper	50.99468833/3.09216383	BE	Sat Sep 19 2020	Sep	2020	Sep-2020	candywrapper
7847052	plastic	50.99433/3.092525	BE	Sat Sep 19 2020	Sep	2020	Sep-2020	plastic
7847051	plastic, bottlecap	50.99573833/3.093325	BE	Sat Sep 19 2020	Sep	2020	Sep-2020	plastic	bottlecap
7847050	plastic	50.99433667/3.0925	BE	Sat Sep 19 2020	Sep	2020	Sep-2020	plastic
7847049	bottlecap	50.99468833/3.09215	BE	Sat Sep 19 2020	Sep	2020	Sep-2020	bottlecap
7847048	plastic	50.994325/3.0924555	BE	Sat Sep 19 2020	Sep	2020	Sep-2020	plastic
7847047	plastic	50.994325/3.09246117	BE	Sat Sep 19 2020	Sep	2020	Sep-2020	plastic
7847045	plastic	50.994325/3.09248617	BE	Sat Sep 19 2020	Sep	2020	Sep-2020	plastic
7847044	plastic	50.99465833/3.09210833	BE	Sat Sep 19 2020	Sep	2020	Sep-2020	plastic
7847039	plastic, wrapper	50.994645/3.0921195	BE	Sat Sep 19 2020	Sep	2020	Sep-2020	plastic	wrapper
7847033	plastic	50.99463333/3.09213883	BE	Sat Sep 19 2020	Sep	2020	Sep-2020	plastic
7847032	plastic	50.99432/3.09244717	BE	Sat Sep 19 2020	Sep	2020	Sep-2020	plastic
7847010	plastic, wrapper	50.99431167/3.09245283	BE	Sat Sep 19 2020	Sep	2020	Sep-2020	plastic	wrapper
7847001	plastic, wrapper	50.99431167/3.09245283	BE	Sat Sep 19 2020	Sep	2020	Sep-2020	plastic	wrapper
7846986	wrapper, plastic	50.99432/3.09232783	BE	Sat Sep 19 2020	Sep	2020	Sep-2020	wrapper	plastic
7846983	plastic, wrapper	50.99430833/3.09229167	BE	Sat Sep 19 2020	Sep	2020	Sep-2020	plastic	wrapper
7846978	tinfoil	50.99462833/3.09211667	BE	Sat Sep 19 2020	Sep	2020	Sep-2020	tinfoil
7846976	beer, bottlecap, metal	50.99461667/3.09208883	BE	Sat Sep 19 2020	Sep	2020	Sep-2020	beer	bottlecap	metal
7846971	wrapper, chipsbag	50.99435/3.09204717	BE	Sat Sep 19 2020	Sep	2020	Sep-2020	wrapper	chipsbag
7846970	plastic	50.99428667/3.092	BE	Sat Sep 19 2020	Sep	2020	Sep-2020	plastic
7846968	aluminum, can	50.99460333/3.09206667	BE	Sat Sep 19 2020	Sep	2020	Sep-2020	aluminum	can
7846962	plastic, wrapper	50.99428833/3.09198883	BE	Sat Sep 19 2020	Sep	2020	Sep-2020	plastic	wrapper
7846953	metal, can	50.99391667/3.0919555	BE	Sat Sep 19 2020	Sep	2020	Sep-2020	metal	can
7846950	plastic, wrapper	50.993695/3.09190833	BE	Sat Sep 19 2020	Sep	2020	Sep-2020	plastic	wrapper
7846941	plastic	50.99369167/3.09190833	BE	Sat Sep 19 2020	Sep	2020	Sep-2020	plastic
7846937	plastic	50.99367833/3.09187783	BE	Sat Sep 19 2020	Sep	2020	Sep-2020	plastic
7846936	plastic, wrapper	50.99368667/3.09189717	BE	Sat Sep 19 2020	Sep	2020	Sep-2020	plastic	wrapper
7846934	plastic	50.99356167/3.0919555	BE	Sat Sep 19 2020	Sep	2020	Sep-2020	plastic
7846933	plastic, miscellaneous	50.99353833/3.09194717	BE	Sat Sep 19 2020	Sep	2020	Sep-2020	plastic	miscellaneous
7846932	cottonwool	50.99462167/3.09194167	BE	Sat Sep 19 2020	Sep	2020	Sep-2020	cottonwool
7846931	isolation	50.994645/3.09186667	BE	Sat Sep 19 2020	Sep	2020	Sep-2020	isolation
7846930	plastic	50.99326667/3.0921695	BE	Sat Sep 19 2020	Sep	2020	Sep-2020	plastic
7846929	plastic	50.994725/3.0918445	BE	Sat Sep 19 2020	Sep	2020	Sep-2020	plastic
7846928	bottle, glass	50.99518333/3.0921945	BE	Sat Sep 19 2020	Sep	2020	Sep-2020	bottle	glass
7846927	plastic	50.99335833/3.09204717	BE	Sat Sep 19 2020	Sep	2020	Sep-2020	plastic
7846926	plastic, wrapper	50.99545/3.09236117	BE	Sat Sep 19 2020	Sep	2020	Sep-2020	plastic	wrapper
7846921	metal, can	50.99327167/3.09217217	BE	Sat Sep 19 2020	Sep	2020	Sep-2020	metal	can
7846920	plastic	50.99545/3.09236117	BE	Sat Sep 19 2020	Sep	2020	Sep-2020	plastic
7846919	plastic, foodwrapper	50.99327167/3.09217217	BE	Sat Sep 19 2020	Sep	2020	Sep-2020	plastic	foodwrapper
7846917	tennisball	50.995525/3.09245283	BE	Sat Sep 19 2020	Sep	2020	Sep-2020	tennisball
7846916	drankkarton	50.993245/3.0922055	BE	Sat Sep 19 2020	Sep	2020	Sep-2020	drankkarton
7846910	wrapper, plastic	50.99324667/3.09218617	BE	Sat Sep 19 2020	Sep	2020	Sep-2020	wrapper	plastic
7846908	sigarettenpeuk	50.99577/3.09272783	BE	Sat Sep 19 2020	Sep	2020	Sep-2020	sigarettenpeuk
7846907	cigarette	50.99577/3.092725	BE	Sat Sep 19 2020	Sep	2020	Sep-2020	cigarette
7846906	wrapper, chipsbag	50.993245/3.0922055	BE	Sat Sep 19 2020	Sep	2020	Sep-2020	wrapper	chipsbag
7846905	handschoen, rubberglove	50.99285/3.09252217	BE	Sat Sep 19 2020	Sep	2020	Sep-2020	handschoen	rubberglove
7846904	wrapper, plastic	50.992875/3.0925195	BE	Sat Sep 19 2020	Sep	2020	Sep-2020	wrapper	plastic
7846903	karton	50.99577167/3.09273333	BE	Sat Sep 19 2020	Sep	2020	Sep-2020	karton
7844947	wrapper	50.99437/3.09306667	BE	Sat Sep 19 2020	Sep	2020	Sep-2020	wrapper
7844946	plastic	50.99143333/3.09248333	BE	Sat Sep 19 2020	Sep	2020	Sep-2020	plastic
7844944	plastic, piece	50.99143667/3.09251383	BE	Sat Sep 19 2020	Sep	2020	Sep-2020	plastic	piece
7844942	plastic	50.991295/3.09248883	BE	Sat Sep 19 2020	Sep	2020	Sep-2020	plastic
7844941	rood-wit afzettape	50.99083/3.09305	BE	Sat Sep 19 2020	Sep	2020	Sep-2020	rood-wit afzettape
7844940	bubblewrap	50.99081167/3.09302783	BE	Sat Sep 19 2020	Sep	2020	Sep-2020	bubblewrap
7844938	afzetlint	50.99084667/3.09304717	BE	Sat Sep 19 2020	Sep	2020	Sep-2020	afzetlint
7844934	isolation	50.99440833/3.09209167	BE	Sat Sep 19 2020	Sep	2020	Sep-2020	isolation
7844931	plastic, wrapper	50.99445/3.09213333	BE	Sat Sep 19 2020	Sep	2020	Sep-2020	plastic	wrapper
7844926	paper	50.9944/3.0920945	BE	Sat Sep 19 2020	Sep	2020	Sep-2020	paper
7844924	sigarettenpakje	50.99438667/3.0921445	BE	Sat Sep 19 2020	Sep	2020	Sep-2020	sigarettenpakje
7844922	aluminum, energydrink, metal	50.99443333/3.092225	BE	Sat Sep 19 2020	Sep	2020	Sep-2020	aluminum	energydrink	metal
7844921	bottlecap	50.99449167/3.0923055	BE	Sat Sep 19 2020	Sep	2020	Sep-2020	bottlecap
7844920	plastic	50.994495/3.09237217	BE	Sat Sep 19 2020	Sep	2020	Sep-2020	plastic
7844919	plastic	50.9945/3.09253333	BE	Sat Sep 19 2020	Sep	2020	Sep-2020	plastic
7844913	plastic, afzetlint	50.99451333/3.09256117	BE	Sat Sep 19 2020	Sep	2020	Sep-2020	plastic	afzetlint
7844912	plastic, straw	50.99451333/3.09255833	BE	Sat Sep 19 2020	Sep	2020	Sep-2020	plastic	straw
7844904	sigarettenpakje	50.99453333/3.0926055	BE	Sat Sep 19 2020	Sep	2020	Sep-2020	sigarettenpakje
7844902	newspaper	50.99453/3.09257217	BE	Sat Sep 19 2020	Sep	2020	Sep-2020	newspaper
7844901	plastic, toy	50.99451167/3.09258333	BE	Sat Sep 19 2020	Sep	2020	Sep-2020	plastic	toy
7844893	plastic	50.99450333/3.09257783	BE	Sat Sep 19 2020	Sep	2020	Sep-2020	plastic
7844892	plastic, wrapper	50.99453/3.09258617	BE	Sat Sep 19 2020	Sep	2020	Sep-2020	plastic	wrapper
7844889	plastic, wrapper	50.99457167/3.09261117	BE	Sat Sep 19 2020	Sep	2020	Sep-2020	plastic	wrapper
7844886	wrapper, candy, bag, plastic	50.99452167/3.0927445	BE	Sat Sep 19 2020	Sep	2020	Sep-2020	wrapper	candy	bag	plastic
7844885	wrapper	50.99452/3.09276667	BE	Sat Sep 19 2020	Sep	2020	Sep-2020	wrapper
7844882	plastic	50.99453/3.09301117	BE	Sat Sep 19 2020	Sep	2020	Sep-2020	plastic
7844881	bottlecap	50.99456667/3.09283883	BE	Sat Sep 19 2020	Sep	2020	Sep-2020	bottlecap
7844875	isolation	50.99433833/3.093075	BE	Sat Sep 19 2020	Sep	2020	Sep-2020	isolation
7844874	bottlecap	50.99456667/3.09284717	BE	Sat Sep 19 2020	Sep	2020	Sep-2020	bottlecap
7844873	bottlecap	50.99453667/3.09290283	BE	Sat Sep 19 2020	Sep	2020	Sep-2020	bottlecap
7844872	cardboard	50.99454167/3.0929	BE	Sat Sep 19 2020	Sep	2020	Sep-2020	cardboard
7844868	plasticcup	50.99450333/3.0929055	BE	Sat Sep 19 2020	Sep	2020	Sep-2020	plasticcup
7844867	beerbottlecap	50.99452167/3.093	BE	Sat Sep 19 2020	Sep	2020	Sep-2020	beerbottlecap
7844862	paper	50.99452167/3.093	BE	Sat Sep 19 2020	Sep	2020	Sep-2020	paper
7844858	paper	50.99452/3.09299717	BE	Sat Sep 19 2020	Sep	2020	Sep-2020	paper
7844857	paper	50.99451333/3.09299717	BE	Sat Sep 19 2020	Sep	2020	Sep-2020	paper
7844854	beerbottlecap	50.99444167/3.0929945	BE	Sat Sep 19 2020	Sep	2020	Sep-2020	beerbottlecap
7844852	beerbottlecap	50.99445333/3.09295283	BE	Sat Sep 19 2020	Sep	2020	Sep-2020	beerbottlecap
7844851	plasticcup	50.99446167/3.09294167	BE	Sat Sep 19 2020	Sep	2020	Sep-2020	plasticcup
7844849	plastic, toy	50.99482/3.09309167	BE	Sat Sep 19 2020	Sep	2020	Sep-2020	plastic	toy
7841243	plastic, wrapper, chipsbag	50.9838307080269/3.09746554634132	BE	Sat Sep 19 2020	Sep	2020	Sep-2020	plastic	wrapper	chipsbag
7820371	metal, piece	50.4967837/3.6577782	BE	Fri Sep 18 2020	Sep	2020	Sep-2020	metal	piece
7820370	metal, screw	50.496781/3.6577629	BE	Fri Sep 18 2020	Sep	2020	Sep-2020	metal	screw
7820369	butt, cigarette	50.4967741/3.6577542	BE	Fri Sep 18 2020	Sep	2020	Sep-2020	butt	cigarette
7820368	plastic	50.496771/3.6577479	BE	Fri Sep 18 2020	Sep	2020	Sep-2020	plastic
7820367	cigarette	50.4967721/3.6577378	BE	Fri Sep 18 2020	Sep	2020	Sep-2020	cigarette
7820366	plastic	50.4967769/3.6578855	BE	Fri Sep 18 2020	Sep	2020	Sep-2020	plastic
7820365	plastic, wrapper	50.4967808/3.6578767	BE	Fri Sep 18 2020	Sep	2020	Sep-2020	plastic	wrapper
7820364	plastic	50.4967732/3.6577242	BE	Fri Sep 18 2020	Sep	2020	Sep-2020	plastic
7820363	plastic	50.4968513/3.6579173	BE	Fri Sep 18 2020	Sep	2020	Sep-2020	plastic
7820362	butt, cigarette	50.4967763/3.6577642	BE	Fri Sep 18 2020	Sep	2020	Sep-2020	butt	cigarette
7820361	plastic	50.4967815/3.6578636	BE	Fri Sep 18 2020	Sep	2020	Sep-2020	plastic
7820360	plastic	50.4968513/3.6579173	BE	Fri Sep 18 2020	Sep	2020	Sep-2020	plastic
7820359	aluminum	50.4967752/3.6578222	BE	Fri Sep 18 2020	Sep	2020	Sep-2020	aluminum
7820358	metal, nail	50.496786/3.6578387	BE	Fri Sep 18 2020	Sep	2020	Sep-2020	metal	nail
7818163	cookie	50.8455265111246/4.73706159088189	BE	Fri Sep 18 2020	Sep	2020	Sep-2020	cookie
7815518	textile	51.0739498146045/4.04051616000148	BE	Fri Sep 18 2020	Sep	2020	Sep-2020	textile
7810668	plastic, folie	51.0739044429205/4.04071207161177	BE	Fri Sep 18 2020	Sep	2020	Sep-2020	plastic	folie
7796042	koffiebeker, plastiek	51.0742686395505/4.04216801641902	BE	Thu Sep 17 2020	Sep	2020	Sep-2020	koffiebeker	plastiek
7793989	can	50.2412067/5.1881248	BE	Thu Sep 17 2020	Sep	2020	Sep-2020	can
7793987	can	50.2412067/5.1881248	BE	Thu Sep 17 2020	Sep	2020	Sep-2020	can
7793984	can	50.2412166/5.1881462	BE	Thu Sep 17 2020	Sep	2020	Sep-2020	can
7793982	can	50.2412067/5.1881248	BE	Thu Sep 17 2020	Sep	2020	Sep-2020	can
7793978	plastic	50.2412385/5.1881202	BE	Thu Sep 17 2020	Sep	2020	Sep-2020	plastic
7793977	plastic	50.241229/5.1881305	BE	Thu Sep 17 2020	Sep	2020	Sep-2020	plastic
7793976	can	50.241229/5.1881305	BE	Thu Sep 17 2020	Sep	2020	Sep-2020	can
7793975	can	50.2412166/5.1881462	BE	Thu Sep 17 2020	Sep	2020	Sep-2020	can
7793973	can	50.2412166/5.1881462	BE	Thu Sep 17 2020	Sep	2020	Sep-2020	can
7793972	can	50.241233/5.1881137	BE	Thu Sep 17 2020	Sep	2020	Sep-2020	can
7793970	can	50.2412385/5.1881202	BE	Thu Sep 17 2020	Sep	2020	Sep-2020	can
7793965	can	50.241229/5.1881305	BE	Thu Sep 17 2020	Sep	2020	Sep-2020	can
7788623	can, aluminum, redbull	50.8545473828984/4.42649979714703	BE	Thu Sep 17 2020	Sep	2020	Sep-2020	can	aluminum	redbull
7788622	plastic, bag	50.8545866134984/4.42641515633711	BE	Thu Sep 17 2020	Sep	2020	Sep-2020	plastic	bag
7788621	cigarettebutt	50.8545733637433/4.42642895214358	BE	Thu Sep 17 2020	Sep	2020	Sep-2020	cigarettebutt
7788620	cigarettebutt	50.8545026252722/4.4264343725093	BE	Thu Sep 17 2020	Sep	2020	Sep-2020	cigarettebutt
7788619	bottlecap, plastic	50.8545702741925/4.42643058458305	BE	Thu Sep 17 2020	Sep	2020	Sep-2020	bottlecap	plastic
7788618	bottlecap, metal	50.8545292899204/4.42637838391007	BE	Thu Sep 17 2020	Sep	2020	Sep-2020	bottlecap	metal
7788617	paper, cigarettepack, marlboro	50.8545473828984/4.42649979714703	BE	Thu Sep 17 2020	Sep	2020	Sep-2020	paper	cigarettepack	marlboro
7788314	straw	50.8540167095738/4.42557847524499	BE	Thu Sep 17 2020	Sep	2020	Sep-2020	straw
7788313	paper, plastic	50.8540144004998/4.42549907338408	BE	Thu Sep 17 2020	Sep	2020	Sep-2020	paper	plastic
7788312	plastic, candy	50.8538969858654/4.42536808458316	BE	Thu Sep 17 2020	Sep	2020	Sep-2020	plastic	candy
7788311	paper	50.8538015915185/4.42542803727735	BE	Thu Sep 17 2020	Sep	2020	Sep-2020	paper
7788310	plastic	50.8538379759815/4.42548011446506	BE	Thu Sep 17 2020	Sep	2020	Sep-2020	plastic
7788309	candy, wrapper, plastic	50.8538064009598/4.42537955193345	BE	Thu Sep 17 2020	Sep	2020	Sep-2020	candy	wrapper	plastic
7788308	cigarettebutt	50.8538491239259/4.42528159549302	BE	Thu Sep 17 2020	Sep	2020	Sep-2020	cigarettebutt
7788307	aluminum, icetea, lipton	50.852448135649/4.42347972517837	BE	Thu Sep 17 2020	Sep	2020	Sep-2020	aluminum	icetea	lipton
7788306	straw, plastic	50.8538953874781/4.42549530779285	BE	Thu Sep 17 2020	Sep	2020	Sep-2020	straw	plastic
7788304	plastic	50.8535469320384/4.42489948505591	BE	Thu Sep 17 2020	Sep	2020	Sep-2020	plastic
7788302	plastic	50.8533925663792/4.42483311481252	BE	Thu Sep 17 2020	Sep	2020	Sep-2020	plastic
7788301	plastic	50.8535332978116/4.42478541793707	BE	Thu Sep 17 2020	Sep	2020	Sep-2020	plastic
7788300	plastic	50.8534413730438/4.42464715958556	BE	Thu Sep 17 2020	Sep	2020	Sep-2020	plastic
7788298	cigarettepack, plastic, paper	50.8534408996197/4.42473434132144	BE	Thu Sep 17 2020	Sep	2020	Sep-2020	cigarettepack	plastic	paper
7788297	can, cocacola, aluminum	50.8531702533083/4.42496601609771	BE	Thu Sep 17 2020	Sep	2020	Sep-2020	can	cocacola	aluminum
7788296	cigarette	50.8533110229234/4.42458938804718	BE	Thu Sep 17 2020	Sep	2020	Sep-2020	cigarette
7788295	cigarette	50.8533110229234/4.42458938804718	BE	Thu Sep 17 2020	Sep	2020	Sep-2020	cigarette
7788294	plastic	50.8531698221718/4.42478232053191	BE	Thu Sep 17 2020	Sep	2020	Sep-2020	plastic
7788292	candywrapper, plastic, wrapper	50.8533194802798/4.42460960761509	BE	Thu Sep 17 2020	Sep	2020	Sep-2020	candywrapper	plastic	wrapper
7788291	paper	50.8532395825914/4.42449367112011	BE	Thu Sep 17 2020	Sep	2020	Sep-2020	paper
7788290	cigarette	50.8532596866368/4.42452822073086	BE	Thu Sep 17 2020	Sep	2020	Sep-2020	cigarette
7788289	bottlecap, heineken, metal	50.8532261393419/4.4244573050308	BE	Thu Sep 17 2020	Sep	2020	Sep-2020	bottlecap	heineken	metal
7788288	bottlecap, heineken, metal	50.8531559869977/4.42482044623323	BE	Thu Sep 17 2020	Sep	2020	Sep-2020	bottlecap	heineken	metal
7788287	cigarette	50.8531608956745/4.42473942537254	BE	Thu Sep 17 2020	Sep	2020	Sep-2020	cigarette
7788285	metal	50.8530138569405/4.42441035005802	BE	Thu Sep 17 2020	Sep	2020	Sep-2020	metal
7788284	bottlecap, cocacola, plastic	50.8530475957131/4.42498925584783	BE	Thu Sep 17 2020	Sep	2020	Sep-2020	bottlecap	cocacola	plastic
7788283	cigarette	50.8530138569405/4.42441035005802	BE	Thu Sep 17 2020	Sep	2020	Sep-2020	cigarette
7788282	aluminum	50.8531369639705/4.42453131429761	BE	Thu Sep 17 2020	Sep	2020	Sep-2020	aluminum
7788280	paper	50.8531716428728/4.42437285046991	BE	Thu Sep 17 2020	Sep	2020	Sep-2020	paper
7788279	papier	50.8531602569765/4.42432259265449	BE	Thu Sep 17 2020	Sep	2020	Sep-2020	papier
7788278	bottlecap, heineken, metal	50.8531335296437/4.42434206054034	BE	Thu Sep 17 2020	Sep	2020	Sep-2020	bottlecap	heineken	metal
7788277	paper	50.8531263724854/4.42432002678501	BE	Thu Sep 17 2020	Sep	2020	Sep-2020	paper
7788276	plastic, bike part	50.8529911974167/4.42433043613489	BE	Thu Sep 17 2020	Sep	2020	Sep-2020	plastic	bike part
7788274	plastic	50.8530926615369/4.42434160363085	BE	Thu Sep 17 2020	Sep	2020	Sep-2020	plastic
7788272	paper	50.8530017131291/4.42414537429957	BE	Thu Sep 17 2020	Sep	2020	Sep-2020	paper
7788271	plastic	50.8530017131291/4.42414537429957	BE	Thu Sep 17 2020	Sep	2020	Sep-2020	plastic
7788269	aluminum	50.8529509207161/4.42419406297479	BE	Thu Sep 17 2020	Sep	2020	Sep-2020	aluminum
7788268	plastic	50.8529861729596/4.42419818249217	BE	Thu Sep 17 2020	Sep	2020	Sep-2020	plastic
7788267	plastic	50.8529859693792/4.42423648565472	BE	Thu Sep 17 2020	Sep	2020	Sep-2020	plastic
7788266	lighter, plastic	50.8529611996434/4.42427565943838	BE	Thu Sep 17 2020	Sep	2020	Sep-2020	lighter	plastic
7788264	lighter, bic, plastic	50.852948066165/4.42402721100712	BE	Thu Sep 17 2020	Sep	2020	Sep-2020	lighter	bic	plastic
7788262	bottle, plastic, san pellegrino	50.8528000634992/4.42387396604866	BE	Thu Sep 17 2020	Sep	2020	Sep-2020	bottle	plastic	san pellegrino
7788261	plastic, wrapper, candy	50.8528000634992/4.42387396604866	BE	Thu Sep 17 2020	Sep	2020	Sep-2020	plastic	wrapper	candy
7788260	plastic, wrapper, bag	50.8526324262806/4.42373811780112	BE	Thu Sep 17 2020	Sep	2020	Sep-2020	plastic	wrapper	bag
7788259	aluminum, cocacola, can	50.852726652002/4.42417857116581	BE	Thu Sep 17 2020	Sep	2020	Sep-2020	aluminum	cocacola	can
7788258	bottle, cocacola, plastic	50.8527219117162/4.42394290007303	BE	Thu Sep 17 2020	Sep	2020	Sep-2020	bottle	cocacola	plastic
7788257	aluminum, can, 7up	50.8527219117162/4.42394290007303	BE	Thu Sep 17 2020	Sep	2020	Sep-2020	aluminum	can	7up
7788256	paper	50.8526248540057/4.42349379776874	BE	Thu Sep 17 2020	Sep	2020	Sep-2020	paper
7788255	wrapper, plastic, kinderbueno	50.8527120825361/4.42398703608609	BE	Thu Sep 17 2020	Sep	2020	Sep-2020	wrapper	plastic	kinderbueno
7788254	paper	50.8526958632604/4.42355333557373	BE	Thu Sep 17 2020	Sep	2020	Sep-2020	paper
7788253	paper	50.852607836846/4.42361327977621	BE	Thu Sep 17 2020	Sep	2020	Sep-2020	paper
7788252	can, metal, gordon	50.8525955925271/4.4235730305076	BE	Thu Sep 17 2020	Sep	2020	Sep-2020	can	metal	gordon
7788251	bottle, glass	50.8526900597906/4.4237138023849	BE	Thu Sep 17 2020	Sep	2020	Sep-2020	bottle	glass
7788250	plastic	50.8525955925271/4.4235730305076	BE	Thu Sep 17 2020	Sep	2020	Sep-2020	plastic
7788249	paper	50.8519790475356/4.42323208733689	BE	Thu Sep 17 2020	Sep	2020	Sep-2020	paper
7788248	glass	50.8521353477052/4.42324147855573	BE	Thu Sep 17 2020	Sep	2020	Sep-2020	glass
7788246	plastic, wrapper	50.8526975062788/4.42409351374497	BE	Thu Sep 17 2020	Sep	2020	Sep-2020	plastic	wrapper
7788244	can, metal, jupiler	50.8523470087112/4.42312400727659	BE	Thu Sep 17 2020	Sep	2020	Sep-2020	can	metal	jupiler
7788242	plastic, wrapper, lotus	50.8524934579141/4.42363495054492	BE	Thu Sep 17 2020	Sep	2020	Sep-2020	plastic	wrapper	lotus
7788240	plastic, wrapper	50.8526933077435/4.42404283546941	BE	Thu Sep 17 2020	Sep	2020	Sep-2020	plastic	wrapper
7788239	plastic	50.8526265719298/4.4240109144137	BE	Thu Sep 17 2020	Sep	2020	Sep-2020	plastic
7788238	bag, plastic, lays	50.8521664625474/4.42293471292579	BE	Thu Sep 17 2020	Sep	2020	Sep-2020	bag	plastic	lays
7787597	plastic, wrapper	50.8515165907793/4.42319072977363	BE	Thu Sep 17 2020	Sep	2020	Sep-2020	plastic	wrapper
7787594	plastic, wrapper, haribo	50.8515082620088/4.42283888893947	BE	Thu Sep 17 2020	Sep	2020	Sep-2020	plastic	wrapper	haribo
7787592	wrapper	50.8513656866495/4.4230455172532	BE	Thu Sep 17 2020	Sep	2020	Sep-2020	wrapper
7787590	plastic	50.8513656866495/4.4230455172532	BE	Thu Sep 17 2020	Sep	2020	Sep-2020	plastic
7787589	aluminum, foil, wrapper	50.8513035471727/4.4233388967319	BE	Thu Sep 17 2020	Sep	2020	Sep-2020	aluminum	foil	wrapper
7787586	plastic	50.8512809766174/4.42254333516131	BE	Thu Sep 17 2020	Sep	2020	Sep-2020	plastic
7787584	plastic	50.8511949316467/4.42297654648499	BE	Thu Sep 17 2020	Sep	2020	Sep-2020	plastic
7787583	caprisun, drinkpouch, plastic	50.8512248361122/4.42333296595981	BE	Thu Sep 17 2020	Sep	2020	Sep-2020	caprisun	drinkpouch	plastic
7787581	clothing	50.8512248361122/4.42333296595981	BE	Thu Sep 17 2020	Sep	2020	Sep-2020	clothing
7787580	bottle, plastic	50.8512693533271/4.42335681085492	BE	Thu Sep 17 2020	Sep	2020	Sep-2020	bottle	plastic
7787578	plastic	50.8508223134008/4.42356911168364	BE	Thu Sep 17 2020	Sep	2020	Sep-2020	plastic
7787574	paper	50.8512540605374/4.42324012604096	BE	Thu Sep 17 2020	Sep	2020	Sep-2020	paper
7787573	bottlecap, metal	50.8514076640838/4.42276976012165	BE	Thu Sep 17 2020	Sep	2020	Sep-2020	bottlecap	metal
7787572	metal, wrapper	50.8511682528144/4.42289665288755	BE	Thu Sep 17 2020	Sep	2020	Sep-2020	metal	wrapper
7787569	paper, loveletter	50.8515162795668/4.42331994127239	BE	Thu Sep 17 2020	Sep	2020	Sep-2020	paper	loveletter
7787567	paper	50.8511981354602/4.42310092340573	BE	Thu Sep 17 2020	Sep	2020	Sep-2020	paper
7787566	plastic	50.8518265866309/4.42263594966079	BE	Thu Sep 17 2020	Sep	2020	Sep-2020	plastic
7787565	paper	50.8507423982893/4.42358138538625	BE	Thu Sep 17 2020	Sep	2020	Sep-2020	paper
7787392	bag, plastic	50.8503451838373/4.42402412474096	BE	Thu Sep 17 2020	Sep	2020	Sep-2020	bag	plastic
7787391	plastic	50.8504384142213/4.42434112998872	BE	Thu Sep 17 2020	Sep	2020	Sep-2020	plastic
7787390	cigarette	50.8503193433318/4.42439748740228	BE	Thu Sep 17 2020	Sep	2020	Sep-2020	cigarette
7787389	plastic, wrapper	50.8502835025306/4.42525899660439	BE	Thu Sep 17 2020	Sep	2020	Sep-2020	plastic	wrapper
7787387	plastic, wrapper, kinderbueno	50.8495960954617/4.42557524712851	BE	Thu Sep 17 2020	Sep	2020	Sep-2020	plastic	wrapper	kinderbueno
7787386	bottle, glass, leffe	50.8501928256705/4.42508096077726	BE	Thu Sep 17 2020	Sep	2020	Sep-2020	bottle	glass	leffe
7787383	aluminum, can, gordon	50.8495664254146/4.4258285258458	BE	Thu Sep 17 2020	Sep	2020	Sep-2020	aluminum	can	gordon
7787379	plastic, wrapper, lu	50.8499003315305/4.42558953150921	BE	Thu Sep 17 2020	Sep	2020	Sep-2020	plastic	wrapper	lu
7787377	plastic	50.8498282503642/4.4256315937161	BE	Thu Sep 17 2020	Sep	2020	Sep-2020	plastic
7787375	plastic, wrapper	50.8497156683781/4.42559629432372	BE	Thu Sep 17 2020	Sep	2020	Sep-2020	plastic	wrapper
7787374	plastic	50.8498282503642/4.4256315937161	BE	Thu Sep 17 2020	Sep	2020	Sep-2020	plastic
7787373	plastic, bag	50.8496545263882/4.42556474323181	BE	Thu Sep 17 2020	Sep	2020	Sep-2020	plastic	bag
7787372	plastic, paper, delhaize	50.8497628521584/4.42577605864177	BE	Thu Sep 17 2020	Sep	2020	Sep-2020	plastic	paper	delhaize
7787370	plastic, kinderbueno	50.8501019385243/4.42607294965129	BE	Thu Sep 17 2020	Sep	2020	Sep-2020	plastic	kinderbueno
7787369	can, metal, gordon	50.8495999993825/4.42629398010251	BE	Thu Sep 17 2020	Sep	2020	Sep-2020	can	metal	gordon
7787367	plastic, wrapper	50.8498758002376/4.42596536053484	BE	Thu Sep 17 2020	Sep	2020	Sep-2020	plastic	wrapper
7787366	plastic, wrapper	50.84997218805/4.42643981803246	BE	Thu Sep 17 2020	Sep	2020	Sep-2020	plastic	wrapper
7787365	can, metal, jupiler	50.8498110228655/4.42637066719528	BE	Thu Sep 17 2020	Sep	2020	Sep-2020	can	metal	jupiler
7787362	plastic	50.8498758002376/4.42596536053484	BE	Thu Sep 17 2020	Sep	2020	Sep-2020	plastic
7787361	plastic, bag	50.849732919594/4.42562020003312	BE	Thu Sep 17 2020	Sep	2020	Sep-2020	plastic	bag
7787358	plastic, stick	50.8497525163139/4.42562324464075	BE	Thu Sep 17 2020	Sep	2020	Sep-2020	plastic	stick
7787355	caprisun, drinkpouch, plastic	50.8497525163139/4.42562324464075	BE	Thu Sep 17 2020	Sep	2020	Sep-2020	caprisun	drinkpouch	plastic
7787354	plastic	50.8497974283838/4.4263962942708	BE	Thu Sep 17 2020	Sep	2020	Sep-2020	plastic
7787353	plastic	50.8498450377256/4.42550378714825	BE	Thu Sep 17 2020	Sep	2020	Sep-2020	plastic
7786795	plastic	50.8499944906367/4.42633892805776	BE	Thu Sep 17 2020	Sep	2020	Sep-2020	plastic
7786794	cigarettepack, paper, plastic	50.8500759303826/4.42633918359567	BE	Thu Sep 17 2020	Sep	2020	Sep-2020	cigarettepack	paper	plastic
7786791	aluminum	50.8500316039984/4.42620005336728	BE	Thu Sep 17 2020	Sep	2020	Sep-2020	aluminum
7783745	plastic, tiewrap	51.36106167/3.32710333	BE	Mon Sep 07 2020	Sep	2020	Sep-2020	plastic	tiewrap
7751044	plastic	50.8823158/4.7350215	BE	Mon Sep 14 2020	Sep	2020	Sep-2020	plastic
7751043	plastic	50.880928/4.7345061	BE	Mon Sep 14 2020	Sep	2020	Sep-2020	plastic
7751042	plastic	50.8801616/4.7331722	BE	Mon Sep 14 2020	Sep	2020	Sep-2020	plastic
7751041	plastic, bottle	50.8229094/3.2588691	BE	Mon Sep 14 2020	Sep	2020	Sep-2020	plastic	bottle
7751040	wrapper, plastic	50.8791351/4.7310991	BE	Mon Sep 14 2020	Sep	2020	Sep-2020	wrapper	plastic
7751039	beer, aluminum, can	50.8803203/4.7334846	BE	Mon Sep 14 2020	Sep	2020	Sep-2020	beer	aluminum	can
7751038	plastic	50.879569/4.7320135	BE	Mon Sep 14 2020	Sep	2020	Sep-2020	plastic
7751037	plastic	50.882556/4.7343583	BE	Mon Sep 14 2020	Sep	2020	Sep-2020	plastic
7751036	plastic	50.8785128/4.7299228	BE	Mon Sep 14 2020	Sep	2020	Sep-2020	plastic
7751035	plastic, candy	50.8804541/4.7337772	BE	Mon Sep 14 2020	Sep	2020	Sep-2020	plastic	candy
7751034	energydrink, can, redbull	50.8793517/4.7315939	BE	Mon Sep 14 2020	Sep	2020	Sep-2020	energydrink	can	redbull
7751033	candy, plastic	50.8821339/4.7342984	BE	Mon Sep 14 2020	Sep	2020	Sep-2020	candy	plastic
7751032	can, metal	50.8783781/4.730107	BE	Mon Sep 14 2020	Sep	2020	Sep-2020	can	metal
7751031	plastic	51.0265734/5.0131004	BE	Sat Sep 12 2020	Sep	2020	Sep-2020	plastic
7751030	plastic	50.8789375/4.7308468	BE	Mon Sep 14 2020	Sep	2020	Sep-2020	plastic
7751029	plastic	50.8807931/4.7343362	BE	Mon Sep 14 2020	Sep	2020	Sep-2020	plastic
7744475	plastic	50.8954451941727/4.71973337961037	BE	Tue Sep 15 2020	Sep	2020	Sep-2020	plastic
7744473	piece, wrapper, plastic	50.8920624809866/4.72513065011041	BE	Tue Sep 15 2020	Sep	2020	Sep-2020	piece	wrapper	plastic
7744472	paper	50.8933312383137/4.72496560471892	BE	Tue Sep 15 2020	Sep	2020	Sep-2020	paper
7744471	piece, paper	50.8933953257268/4.72518850189397	BE	Tue Sep 15 2020	Sep	2020	Sep-2020	piece	paper
7744470	plastic	50.8947845716113/4.72642604989066	BE	Tue Sep 15 2020	Sep	2020	Sep-2020	plastic
7744469	plastic	50.8947358774661/4.72643104000384	BE	Tue Sep 15 2020	Sep	2020	Sep-2020	plastic
7744468	cigarette	50.8952759606256/4.72632375036813	BE	Tue Sep 15 2020	Sep	2020	Sep-2020	cigarette
7744467	cigarette	50.8952759606256/4.72632375036813	BE	Tue Sep 15 2020	Sep	2020	Sep-2020	cigarette
7744465	cigarette	50.8953725972371/4.72639753202207	BE	Tue Sep 15 2020	Sep	2020	Sep-2020	cigarette
7744464	cigarette	50.8953525738484/4.72647756582268	BE	Tue Sep 15 2020	Sep	2020	Sep-2020	cigarette
7744463	cigarette	50.8956589566456/4.72676099718701	BE	Tue Sep 15 2020	Sep	2020	Sep-2020	cigarette
7744462	plastic	50.8955731885323/4.7255179212033	BE	Tue Sep 15 2020	Sep	2020	Sep-2020	plastic
7744461	cigarette	50.8954245695546/4.72623689666881	BE	Tue Sep 15 2020	Sep	2020	Sep-2020	cigarette
7744460	cigarette, plastic	50.8955731885323/4.7255179212033	BE	Tue Sep 15 2020	Sep	2020	Sep-2020	cigarette	plastic
7744459	paper	50.8955630729722/4.72550590604352	BE	Tue Sep 15 2020	Sep	2020	Sep-2020	paper
7744458	plastic	50.8955731885323/4.7255179212033	BE	Tue Sep 15 2020	Sep	2020	Sep-2020	plastic
7744457	wrapper, plastic	50.895602950185/4.7254965657563	BE	Tue Sep 15 2020	Sep	2020	Sep-2020	wrapper	plastic
7744456	piece, plastic	50.8956116887838/4.72549082845953	BE	Tue Sep 15 2020	Sep	2020	Sep-2020	piece	plastic
7744454	plastic	50.8955973126509/4.7254848769012	BE	Tue Sep 15 2020	Sep	2020	Sep-2020	plastic
7744453	plastic	50.8957606177118/4.72517135625238	BE	Tue Sep 15 2020	Sep	2020	Sep-2020	plastic
7744452	plastic	50.8955986797638/4.72548736673148	BE	Tue Sep 15 2020	Sep	2020	Sep-2020	plastic
7744451	piece, plastic	50.8957606177118/4.72517135625238	BE	Tue Sep 15 2020	Sep	2020	Sep-2020	piece	plastic
7744450	plastic	50.8959299882522/4.72492034210108	BE	Tue Sep 15 2020	Sep	2020	Sep-2020	plastic
7744449	plastic	50.895795429331/4.72514615483562	BE	Tue Sep 15 2020	Sep	2020	Sep-2020	plastic
7744448	aluminum	50.8959648276734/4.72510405330702	BE	Tue Sep 15 2020	Sep	2020	Sep-2020	aluminum
7744447	wrapper, plastic	50.8962237055397/4.72440497751352	BE	Tue Sep 15 2020	Sep	2020	Sep-2020	wrapper	plastic
7744446	plastic	50.8961457929271/4.72467520979116	BE	Tue Sep 15 2020	Sep	2020	Sep-2020	plastic
7744445	cigarette	50.8959548307391/4.72499632539309	BE	Tue Sep 15 2020	Sep	2020	Sep-2020	cigarette
7744444	cigarette	50.8962281310388/4.72437834291196	BE	Tue Sep 15 2020	Sep	2020	Sep-2020	cigarette
[truncated: 17,434 more rows]
[truncated: 8 more columns]
