# Supplementary material for: Lockdown Litter: A critical analysis of global COVID-19 PPE litter and measures for mitigation
Source: Research Square preprint supplement (doi:10.21203/rs.3.rs-134183/v1), 2021-03-31
Supplement: Supplementary file 2 [file 64cbec11934e405ded2f94c1.csv]

Litter	Tags	Location (Lat/Long)	Country	Date				Tags
9067744	plastic, bag, crisps, piece	48.6519975588179/8.32265459933162	DE	Thu Oct 08 2020	Oct	2020	Oct-2020	plastic	bag	crisps	piece
9067706	tissue, paper	48.6572919879562/8.30356967636226	DE	Thu Oct 08 2020	Oct	2020	Oct-2020	tissue	paper
9067488	plastic, wrapper, wrigleys	48.6572919879562/8.30356967636226	DE	Thu Oct 08 2020	Oct	2020	Oct-2020	plastic	wrapper	wrigleys
9067485	paper	48.6590715498185/8.30684356392204	DE	Thu Oct 08 2020	Oct	2020	Oct-2020	paper
9067484	plastic, piece	48.6589410435862/8.30643041991471	DE	Thu Oct 08 2020	Oct	2020	Oct-2020	plastic	piece
9067483	paper	48.659067526505/8.3067382872182	DE	Thu Oct 08 2020	Oct	2020	Oct-2020	paper
9067482	paper, plastic, candy, wrapper	48.6591994995704/8.30690575764357	DE	Thu Oct 08 2020	Oct	2020	Oct-2020	paper	plastic	candy	wrapper
9067481	paper	48.6589514790556/8.30680400133907	DE	Thu Oct 08 2020	Oct	2020	Oct-2020	paper
9067480	paper	48.6590289278409/8.30679955893038	DE	Thu Oct 08 2020	Oct	2020	Oct-2020	paper
9067479	bottlecap, plastic	48.6555622145987/8.31558689475834	DE	Thu Oct 08 2020	Oct	2020	Oct-2020	bottlecap	plastic
9067478	plastic, piece	48.6590412073291/8.30691439100383	DE	Thu Oct 08 2020	Oct	2020	Oct-2020	plastic	piece
9067477	plastic, bag, piece	48.6568249483115/8.30303851515828	DE	Thu Oct 08 2020	Oct	2020	Oct-2020	plastic	bag	piece
9067476	paper, tissue	48.658941923686/8.30708789639949	DE	Thu Oct 08 2020	Oct	2020	Oct-2020	paper	tissue
9067475	plastic, wrapper, tissuepaperpacket, softundsicher, softandsafe	48.6589506827748/8.30718210899113	DE	Thu Oct 08 2020	Oct	2020	Oct-2020	plastic	wrapper	tissuepaperpacket	softundsicher	softandsafe
9067474	cigarettepack	48.6588617926917/8.30708906986593	DE	Thu Oct 08 2020	Oct	2020	Oct-2020	cigarettepack
9067471	tar, tarpaper	48.6585313780686/8.30595675856649	DE	Thu Oct 08 2020	Oct	2020	Oct-2020	tar	tarpaper
9067470	paper, arbeitgebergutschein, karlsruhe	48.6588737788132/8.30677215010701	DE	Thu Oct 08 2020	Oct	2020	Oct-2020	paper	arbeitgebergutschein	karlsruhe
9067469	straw, plastic	48.6578051699779/8.30492117442964	DE	Thu Oct 08 2020	Oct	2020	Oct-2020	straw	plastic
9067468	tar, tarpaper	48.6587849306396/8.30688664690434	DE	Thu Oct 08 2020	Oct	2020	Oct-2020	tar	tarpaper
9067467	wrigleys, wrigleysextra, citrus, plastic, packaging, gumwrapper	48.6578051699779/8.30492117442964	DE	Thu Oct 08 2020	Oct	2020	Oct-2020	wrigleys	wrigleysextra	citrus	plastic	packaging	gumwrapper
9063858	paper, wrapper, candywrapper	54.6202375/13.3776275	DE	Thu Oct 08 2020	Oct	2020	Oct-2020	paper	wrapper	candywrapper
9063857	plastic, candy, candywrapper	54.6205077/13.3777435	DE	Thu Oct 08 2020	Oct	2020	Oct-2020	plastic	candy	candywrapper
9063856	wrapper, aluminum	54.6202819/13.3775214	DE	Thu Oct 08 2020	Oct	2020	Oct-2020	wrapper	aluminum
9063855	butt, cigarette, cigarettebutt	54.6042295/13.3879823	DE	Thu Oct 08 2020	Oct	2020	Oct-2020	butt	cigarette	cigarettebutt
9063854	silicagel	54.6041855/13.3881073	DE	Thu Oct 08 2020	Oct	2020	Oct-2020	silicagel
9063853	wrapper, plastic, candywrapper	54.6134276/13.3813383	DE	Thu Oct 08 2020	Oct	2020	Oct-2020	wrapper	plastic	candywrapper
9063852	paper, ticket	54.6097359/13.3830515	DE	Thu Oct 08 2020	Oct	2020	Oct-2020	paper	ticket
9063851	wrapper, plastic, candybar	54.6123894/13.3817741	DE	Thu Oct 08 2020	Oct	2020	Oct-2020	wrapper	plastic	candybar
9063850	wrapper, paper, candywrapper	54.6096421/13.3830885	DE	Thu Oct 08 2020	Oct	2020	Oct-2020	wrapper	paper	candywrapper
9063849	plastic, wrapper, bag	54.6053332/13.3855383	DE	Thu Oct 08 2020	Oct	2020	Oct-2020	plastic	wrapper	bag
9063848	butt, cigarette, cigarettebutt	54.6042225/13.388057	DE	Thu Oct 08 2020	Oct	2020	Oct-2020	butt	cigarette	cigarettebutt
9063847	butt, cigarette, cigarettebutt	54.6042308/13.3879857	DE	Thu Oct 08 2020	Oct	2020	Oct-2020	butt	cigarette	cigarettebutt
9063846	cup, plastic	54.604228/13.3879794	DE	Thu Oct 08 2020	Oct	2020	Oct-2020	cup	plastic
9063845	butt, cigarette, cigarettebutt	54.6042112/13.388087	DE	Thu Oct 08 2020	Oct	2020	Oct-2020	butt	cigarette	cigarettebutt
9063844	butt, cigarette, cigarettebutt	54.6042247/13.3880558	DE	Thu Oct 08 2020	Oct	2020	Oct-2020	butt	cigarette	cigarettebutt
9063843	butt, cigarettebutt, cigarette	54.6042387/13.3880358	DE	Thu Oct 08 2020	Oct	2020	Oct-2020	butt	cigarettebutt	cigarette
9063842	butt, cigarette, cigarettebutt	54.6042538/13.3880499	DE	Thu Oct 08 2020	Oct	2020	Oct-2020	butt	cigarette	cigarettebutt
9063841	paper, piece, ticket	54.6197348/13.377678	DE	Thu Oct 08 2020	Oct	2020	Oct-2020	paper	piece	ticket
9063840	plastic, piece	54.6065049/13.3871206	DE	Thu Oct 08 2020	Oct	2020	Oct-2020	plastic	piece
9063839	cigarette, butt, cigarettebutt	54.604271/13.3880688	DE	Thu Oct 08 2020	Oct	2020	Oct-2020	cigarette	butt	cigarettebutt
9063838	plastic, piece, coffeecup	54.6065643/13.387138	DE	Thu Oct 08 2020	Oct	2020	Oct-2020	plastic	piece	coffeecup
9063837	wrapper, paper, candywrapper	54.6207458/13.3777922	DE	Thu Oct 08 2020	Oct	2020	Oct-2020	wrapper	paper	candywrapper
9063836	butt, cigarette, cigarettebutt	54.6042401/13.3880408	DE	Thu Oct 08 2020	Oct	2020	Oct-2020	butt	cigarette	cigarettebutt
9063835	plastic, pieces	54.6042474/13.3880681	DE	Thu Oct 08 2020	Oct	2020	Oct-2020	plastic	pieces
9063834	cord	54.6042328/13.3880442	DE	Thu Oct 08 2020	Oct	2020	Oct-2020	cord
9063833	glass, piece	54.6066397/13.3870485	DE	Thu Oct 08 2020	Oct	2020	Oct-2020	glass	piece
9063832	butt, cigarette, cigarettebutt	54.6116427/13.383685	DE	Thu Oct 08 2020	Oct	2020	Oct-2020	butt	cigarette	cigarettebutt
9063831	wounddressing	54.6042539/13.3880521	DE	Thu Oct 08 2020	Oct	2020	Oct-2020	wounddressing
9063830	tin, metal, cannedfish	54.6117867/13.383629	DE	Thu Oct 08 2020	Oct	2020	Oct-2020	tin	metal	cannedfish
9063829	bag, plastic, dogpoobag	54.5732772/13.4352489	DE	Thu Oct 08 2020	Oct	2020	Oct-2020	bag	plastic	dogpoobag
9063828	butt, cigarette, cigarettebutt	54.6099465/13.3849453	DE	Thu Oct 08 2020	Oct	2020	Oct-2020	butt	cigarette	cigarettebutt
9061690	plastic, sigillodigaranzia, seal, sticker, rigonidiasiago	48.618314994976/8.27422593122039	DE	Thu Oct 08 2020	Oct	2020	Oct-2020	plastic	sigillodigaranzia	seal	sticker	rigonidiasiago
9054833	butt, cigarette, cigarettebutt	54.6206412/13.3773687	DE	Wed Oct 07 2020	Oct	2020	Oct-2020	butt	cigarette	cigarettebutt
9054832	butt, cigarette, cigarettebutt	54.620072/13.3784763	DE	Wed Oct 07 2020	Oct	2020	Oct-2020	butt	cigarette	cigarettebutt
9054831	plastic, condensemilk	54.6207526/13.3778153	DE	Wed Oct 07 2020	Oct	2020	Oct-2020	plastic	condensemilk
9054830	cigarette, cigarettebutt, butt	54.6200767/13.3784682	DE	Wed Oct 07 2020	Oct	2020	Oct-2020	cigarette	cigarettebutt	butt
9054829	butt, cigarette, cigarettebutt	54.6211542/13.3780804	DE	Wed Oct 07 2020	Oct	2020	Oct-2020	butt	cigarette	cigarettebutt
9050696	candy, plastic, wrapper, vivil	48.7623001775227/8.26477051713342	DE	Wed Oct 07 2020	Oct	2020	Oct-2020	candy	plastic	wrapper	vivil
9050695	paper, trainticket, merkurmountaintrain	48.7578175357066/8.2717591803598	DE	Wed Oct 07 2020	Oct	2020	Oct-2020	paper	trainticket	merkurmountaintrain
9050694	plastic, piece	48.7582437135733/8.26994843781765	DE	Wed Oct 07 2020	Oct	2020	Oct-2020	plastic	piece
9050578	butt, celluloseacetate, cigarette	48.7538470700837/8.26555095613772	DE	Wed Oct 07 2020	Oct	2020	Oct-2020	butt	celluloseacetate	cigarette
9050577	candy, plastic, wrapper	48.7595098419569/8.26787559316332	DE	Wed Oct 07 2020	Oct	2020	Oct-2020	candy	plastic	wrapper
9050576	aluminum, piece	48.7595359515853/8.26784357429321	DE	Wed Oct 07 2020	Oct	2020	Oct-2020	aluminum	piece
9050575	glasses, lostandfound, prescriptionglasses, goat	48.7535272166587/8.26471637003893	DE	Wed Oct 07 2020	Oct	2020	Oct-2020	glasses	lostandfound	prescriptionglasses	goat
9050574	metal, stainlesssteel	48.7534836726717/8.26412527822728	DE	Wed Oct 07 2020	Oct	2020	Oct-2020	metal	stainlesssteel
9050573	butt, cigarette	48.7538470700837/8.26555095613772	DE	Wed Oct 07 2020	Oct	2020	Oct-2020	butt	cigarette
9050572	butt, cigarette	48.7538470700837/8.26555095613772	DE	Wed Oct 07 2020	Oct	2020	Oct-2020	butt	cigarette
9050571	butt, celluloseacetate, cigarette	48.7559337448783/8.2739178557026	DE	Wed Oct 07 2020	Oct	2020	Oct-2020	butt	celluloseacetate	cigarette
9050570	cigarette	48.7559337448783/8.2739178557026	DE	Wed Oct 07 2020	Oct	2020	Oct-2020	cigarette
9050569	bottlecap, metal, tequilaflavored	48.7561452622048/8.27488076873894	DE	Wed Oct 07 2020	Oct	2020	Oct-2020	bottlecap	metal	tequilaflavored
9050568	bottlecap, metal, tequilaflavored, corona, coronabeer	48.756021629133/8.27442093753095	DE	Wed Oct 07 2020	Oct	2020	Oct-2020	bottlecap	metal	tequilaflavored	corona	coronabeer
9050567	paper, ticket, merkurmountaintrain, publictransit	48.7562400615297/8.27500591055329	DE	Wed Oct 07 2020	Oct	2020	Oct-2020	paper	ticket	merkurmountaintrain	publictransit
9050566	butt, cigarette, marlboro, onlyone	48.7573754322238/8.27541871928449	DE	Wed Oct 07 2020	Oct	2020	Oct-2020	butt	cigarette	marlboro	onlyone
9050565	cigarette, butt, marlboro	48.7578370236314/8.27179522254343	DE	Wed Oct 07 2020	Oct	2020	Oct-2020	cigarette	butt	marlboro
9050564	plastic, wrapper, hubbabubba	48.7580257002718/8.26996318996723	DE	Wed Oct 07 2020	Oct	2020	Oct-2020	plastic	wrapper	hubbabubba
9050563	plastic, wrapper, candy, ricola	48.757719593168/8.27160277404661	DE	Wed Oct 07 2020	Oct	2020	Oct-2020	plastic	wrapper	candy	ricola
9050559	plastic, nikon, piece, cameraequipment, nikondk25, dk25, occular	48.7582357926748/8.27516634017999	DE	Wed Oct 07 2020	Oct	2020	Oct-2020	plastic	nikon	piece	cameraequipment	nikondk25	dk25	occular
9050558	paper, ticket, publictransit, merkurmountaintrain	48.7563230423711/8.27556422912355	DE	Wed Oct 07 2020	Oct	2020	Oct-2020	paper	ticket	publictransit	merkurmountaintrain
9050557	candy, plastic, wrapper, ricola	48.7573895557306/8.27510959469553	DE	Wed Oct 07 2020	Oct	2020	Oct-2020	candy	plastic	wrapper	ricola
9050556	piece, plastic, nikon, boar	48.7582357926748/8.27516634017999	DE	Wed Oct 07 2020	Oct	2020	Oct-2020	piece	plastic	nikon	boar
9050549	plastic, package, tissue, paper	48.7562959269143/8.27552558854993	DE	Wed Oct 07 2020	Oct	2020	Oct-2020	plastic	package	tissue	paper
9050457	backpack, blanket	48.7533325469575/8.26403131709272	DE	Wed Oct 07 2020	Oct	2020	Oct-2020	backpack	blanket
9050405	bottlecap, plastic	50.8809802/7.0800217	DE	Wed Oct 07 2020	Oct	2020	Oct-2020	bottlecap	plastic
9050391	wrapper, plasticwrapper, knoppers	50.8807722/7.0800657	DE	Wed Oct 07 2020	Oct	2020	Oct-2020	wrapper	plasticwrapper	knoppers
9050390	cup, plastic	50.880842/7.0803928	DE	Wed Oct 07 2020	Oct	2020	Oct-2020	cup	plastic
9050389	can, drink, metal, aluminium	50.8807715/7.0806119	DE	Wed Oct 07 2020	Oct	2020	Oct-2020	can	drink	metal	aluminium
9050388	plastic, candywrapper	50.8809292/7.0799833	DE	Wed Oct 07 2020	Oct	2020	Oct-2020	plastic	candywrapper
9050387	paper	50.8809263/7.0799915	DE	Wed Oct 07 2020	Oct	2020	Oct-2020	paper
9050386	plastic, wrapper, ramen	50.8808394/7.0800114	DE	Wed Oct 07 2020	Oct	2020	Oct-2020	plastic	wrapper	ramen
9049179	cigarette, cigarettebutt, plastic, marlboro, celluloseacetate	48.7578291446425/8.27183143236513	DE	Wed Oct 07 2020	Oct	2020	Oct-2020	cigarette	cigarettebutt	plastic	marlboro	celluloseacetate
9049178	ricola, plastic, wrapper	48.757719593168/8.27160277404661	DE	Wed Oct 07 2020	Oct	2020	Oct-2020	ricola	plastic	wrapper
9049177	butt, celluloseacetate, cigarette	48.758382853166/8.2713511493134	DE	Wed Oct 07 2020	Oct	2020	Oct-2020	butt	celluloseacetate	cigarette
9049176	ricola, candy, plastic, wrapper	48.757719593168/8.27160277404661	DE	Wed Oct 07 2020	Oct	2020	Oct-2020	ricola	candy	plastic	wrapper
9049175	candy, plastic, wrapper, ricola	48.7578077288799/8.27176295221622	DE	Wed Oct 07 2020	Oct	2020	Oct-2020	candy	plastic	wrapper	ricola
9049174	candy, plastic, wrapper, ricola	48.7577556772612/8.27168852091606	DE	Wed Oct 07 2020	Oct	2020	Oct-2020	candy	plastic	wrapper	ricola
9049172	candy, plastic, wrapper, ricola	48.757719593168/8.27160277404661	DE	Wed Oct 07 2020	Oct	2020	Oct-2020	candy	plastic	wrapper	ricola
9049170	butt, celluloseacetate, cigarette, plastic	48.7577510672144/8.27166010626431	DE	Wed Oct 07 2020	Oct	2020	Oct-2020	butt	celluloseacetate	cigarette	plastic
9049169	metal, screw, stainlesssteel	48.7473098020165/8.26846504678863	DE	Wed Oct 07 2020	Oct	2020	Oct-2020	metal	screw	stainlesssteel
9049166	metal, stainlesssteel	48.7535158591799/8.26460748911674	DE	Wed Oct 07 2020	Oct	2020	Oct-2020	metal	stainlesssteel
9049165	butt, celluloseacetate	48.7559337448783/8.2739178557026	DE	Wed Oct 07 2020	Oct	2020	Oct-2020	butt	celluloseacetate
9049154	butt, celluloseacetate, cigarette, cigarettebutt	48.758382853166/8.2713511493134	DE	Wed Oct 07 2020	Oct	2020	Oct-2020	butt	celluloseacetate	cigarette	cigarettebutt
9049152	piece, paper	48.7577510672144/8.27166010626431	DE	Wed Oct 07 2020	Oct	2020	Oct-2020	piece	paper
9049151	plastic, celluloseacetate, butt, cigarette, marlboro	48.7575858599029/8.27149858699019	DE	Wed Oct 07 2020	Oct	2020	Oct-2020	plastic	celluloseacetate	butt	cigarette	marlboro
9049150	butt, celluloseacetate, cigarette, marlboro	48.7578115845553/8.27158483677383	DE	Wed Oct 07 2020	Oct	2020	Oct-2020	butt	celluloseacetate	cigarette	marlboro
9049149	butt, cigarette	48.757719593168/8.27160277404661	DE	Wed Oct 07 2020	Oct	2020	Oct-2020	butt	cigarette
9049148	plastic, wrapper, ricola	48.7571452651627/8.27090028674181	DE	Wed Oct 07 2020	Oct	2020	Oct-2020	plastic	wrapper	ricola
9045297	aluminum, plastic, verpackung	52.3557186/12.7559462	DE	Wed Oct 07 2020	Oct	2020	Oct-2020	aluminum	plastic	verpackung
9039882	butt, cigarette, cigarettebutt	54.6220771/13.3772023	DE	Tue Oct 06 2020	Oct	2020	Oct-2020	butt	cigarette	cigarettebutt
9039881	bottlecap, metal, beerbottlecap	54.6219721/13.3777354	DE	Tue Oct 06 2020	Oct	2020	Oct-2020	bottlecap	metal	beerbottlecap
9036052	paper	52.3396206/12.719472	DE	Tue Oct 06 2020	Oct	2020	Oct-2020	paper
9032604	butt, celluloseacetate, cigarette, plastic, marlboro	48.5616000323077/8.22263829410842	DE	Tue Oct 06 2020	Oct	2020	Oct-2020	butt	celluloseacetate	cigarette	plastic	marlboro
9032596	candy, plastic, wrapper, ricola	48.5679281596547/8.23537317105405	DE	Tue Oct 06 2020	Oct	2020	Oct-2020	candy	plastic	wrapper	ricola
9032595	metal, bottlecap, beer, heineken	48.5681396769812/8.23593576439492	DE	Tue Oct 06 2020	Oct	2020	Oct-2020	metal	bottlecap	beer	heineken
9032594	plastic, rubber, backpacksign, logo, rieker	48.5725651105491/8.23644775419326	DE	Tue Oct 06 2020	Oct	2020	Oct-2020	plastic	rubber	backpacksign	logo	rieker
9032593	plastic, piece	48.572974316821/8.23642057367436	DE	Tue Oct 06 2020	Oct	2020	Oct-2020	plastic	piece
9032592	aluminum, piece	48.572974316821/8.23642057367436	DE	Tue Oct 06 2020	Oct	2020	Oct-2020	aluminum	piece
9032591	plastic, packagingopeningstrap, openingaid, cigarettepackwrap	48.5736802826157/8.23620046489708	DE	Tue Oct 06 2020	Oct	2020	Oct-2020	plastic	packagingopeningstrap	openingaid	cigarettepackwrap
9032588	plastic, hikingpoleplate	48.567878204409/8.23556076009467	DE	Tue Oct 06 2020	Oct	2020	Oct-2020	plastic	hikingpoleplate
9032586	plastic, rubber, hikingbackpackstrap, elastic, elasticband	48.5709483270054/8.23584565893583	DE	Tue Oct 06 2020	Oct	2020	Oct-2020	plastic	rubber	hikingbackpackstrap	elastic	elasticband
9032585	plastic, container, cottagecheese, gervais	48.5617382918005/8.22262731381526	DE	Tue Oct 06 2020	Oct	2020	Oct-2020	plastic	container	cottagecheese	gervais
9032584	paper, tissue	48.5734600062003/8.23615226895384	DE	Tue Oct 06 2020	Oct	2020	Oct-2020	paper	tissue
9032583	plastic, backpackstrap, elastic, elasticband	48.5709483270054/8.23584565893583	DE	Tue Oct 06 2020	Oct	2020	Oct-2020	plastic	backpackstrap	elastic	elasticband
9032582	metal, beerbottlecap, heineken	48.5709075490465/8.23572001420728	DE	Tue Oct 06 2020	Oct	2020	Oct-2020	metal	beerbottlecap	heineken
9032581	butt, celluloseacetate, cigarette, microfibre, marlboro	48.5613057337582/8.22313272219592	DE	Tue Oct 06 2020	Oct	2020	Oct-2020	butt	celluloseacetate	cigarette	microfibre	marlboro
9027813	butt, cigarette, cigarettebutt	54.6195355/13.3781519	DE	Tue Oct 06 2020	Oct	2020	Oct-2020	butt	cigarette	cigarettebutt
9027812	beerbottlecap, metal	54.6304404/13.3761755	DE	Tue Oct 06 2020	Oct	2020	Oct-2020	beerbottlecap	metal
9027811	butt, cigarette, cigarettebutt	54.6195189/13.3781806	DE	Tue Oct 06 2020	Oct	2020	Oct-2020	butt	cigarette	cigarettebutt
9027810	butt, cigarette, cigarettebutt	54.6215912/13.3777074	DE	Tue Oct 06 2020	Oct	2020	Oct-2020	butt	cigarette	cigarettebutt
9027809	bottlecap, metal	54.620748/13.3778093	DE	Tue Oct 06 2020	Oct	2020	Oct-2020	bottlecap	metal
9022179	butt, cigarette, cigarettebutt	54.621097/13.3780007	DE	Mon Oct 05 2020	Oct	2020	Oct-2020	butt	cigarette	cigarettebutt
9022178	butt, cigarette, cigarettebutt	54.6207618/13.3781126	DE	Mon Oct 05 2020	Oct	2020	Oct-2020	butt	cigarette	cigarettebutt
9022177	butt, cigarette, cigarettebutt	54.6203521/13.3783137	DE	Mon Oct 05 2020	Oct	2020	Oct-2020	butt	cigarette	cigarettebutt
9022176	plastic, piece, condensemilk	54.6207484/13.3778042	DE	Mon Oct 05 2020	Oct	2020	Oct-2020	plastic	piece	condensemilk
9022175	plastic, lollipopstick	54.6208195/13.3780576	DE	Mon Oct 05 2020	Oct	2020	Oct-2020	plastic	lollipopstick
9022174	butt, cigarette, cigarettebutt	54.6196139/13.3788552	DE	Mon Oct 05 2020	Oct	2020	Oct-2020	butt	cigarette	cigarettebutt
9022173	butt, cigarette, cigarettebutt	54.6211014/13.3780141	DE	Mon Oct 05 2020	Oct	2020	Oct-2020	butt	cigarette	cigarettebutt
9022172	plastic, barriertape, piece	54.6213307/13.3770803	DE	Mon Oct 05 2020	Oct	2020	Oct-2020	plastic	barriertape	piece
9022171	butt, cigarette, cigarettebutt	54.6207521/13.3781132	DE	Mon Oct 05 2020	Oct	2020	Oct-2020	butt	cigarette	cigarettebutt
9022170	plastic, frenchfriesfork	54.61952/13.3785347	DE	Mon Oct 05 2020	Oct	2020	Oct-2020	plastic	frenchfriesfork
9017487	plastic, bag	48.4262898/12.9123135	DE	Tue Sep 29 2020	Sep	2020	Sep-2020	plastic	bag
9017486	plastic, bag	48.4262898/12.9123135	DE	Tue Sep 29 2020	Sep	2020	Sep-2020	plastic	bag
9016168	plastic, candywrapper	52.4428671/8.2579934	DE	Mon Oct 05 2020	Oct	2020	Oct-2020	plastic	candywrapper
9016167	plastic	52.4411019/8.237071	DE	Mon Oct 05 2020	Oct	2020	Oct-2020	plastic
9015660	cigarettebutt, butt	54.253772/12.3297735	DE	Mon Oct 05 2020	Oct	2020	Oct-2020	cigarettebutt	butt
9015599	handkerchief, cotton	48.6703045992634/8.2392059639173	DE	Mon Oct 05 2020	Oct	2020	Oct-2020	handkerchief	cotton
9013549	plastic, candy, wrapper, leibniz, pickup, bahlsen	48.6757165845937/8.24060582556598	DE	Mon Oct 05 2020	Oct	2020	Oct-2020	plastic	candy	wrapper	leibniz	pickup	bahlsen
9013533	plastic, piece	48.6703058984584/8.23921459727757	DE	Mon Oct 05 2020	Oct	2020	Oct-2020	plastic	piece
9013017	bottlecap, plastic	54.6827326/13.3901822	DE	Mon Oct 05 2020	Oct	2020	Oct-2020	bottlecap	plastic
9013016	plastic, lollipopstick	54.6827762/13.3905269	DE	Mon Oct 05 2020	Oct	2020	Oct-2020	plastic	lollipopstick
9013015	plastic, wrapper, candywrapper, piece	54.68238/13.3956572	DE	Mon Oct 05 2020	Oct	2020	Oct-2020	plastic	wrapper	candywrapper	piece
9013014	plastic	54.6823534/13.3953603	DE	Mon Oct 05 2020	Oct	2020	Oct-2020	plastic
9013013	cigarette, cigarettebutt	54.6823404/13.3953995	DE	Mon Oct 05 2020	Oct	2020	Oct-2020	cigarette	cigarettebutt
9013012	plastic, piece	54.6823458/13.395383	DE	Mon Oct 05 2020	Oct	2020	Oct-2020	plastic	piece
9013011	wrapper, plastic, candywrapper	54.6827613/13.3905366	DE	Mon Oct 05 2020	Oct	2020	Oct-2020	wrapper	plastic	candywrapper
9013010	paper, label, paper label	54.6823482/13.3954081	DE	Mon Oct 05 2020	Oct	2020	Oct-2020	paper	label	paper label
9013009	paper, piece	54.6823725/13.3954454	DE	Mon Oct 05 2020	Oct	2020	Oct-2020	paper	piece
9013008	fishingline, fishinghooks	54.6823707/13.3954239	DE	Mon Oct 05 2020	Oct	2020	Oct-2020	fishingline	fishinghooks
9013007	plastic, wrapper, handkerchief	54.6709778/13.4077832	DE	Mon Oct 05 2020	Oct	2020	Oct-2020	plastic	wrapper	handkerchief
9013006	plastic, pieces	54.6827561/13.3901743	DE	Mon Oct 05 2020	Oct	2020	Oct-2020	plastic	pieces
9013005	piece, plastic	54.681657/13.3873521	DE	Mon Oct 05 2020	Oct	2020	Oct-2020	piece	plastic
9013004	piece, glass	54.6709778/13.4077832	DE	Mon Oct 05 2020	Oct	2020	Oct-2020	piece	glass
9013003	plastic, tinfoil, plasticfoil	54.6724124/13.4229716	DE	Mon Oct 05 2020	Oct	2020	Oct-2020	plastic	tinfoil	plasticfoil
9013002	plastic, cord, piece	54.6829379/13.3897735	DE	Mon Oct 05 2020	Oct	2020	Oct-2020	plastic	cord	piece
9013001	plastic, candywrapper	54.6702618/13.4079379	DE	Mon Oct 05 2020	Oct	2020	Oct-2020	plastic	candywrapper
9013000	plastic, cord, piece	54.6834829/13.3826754	DE	Mon Oct 05 2020	Oct	2020	Oct-2020	plastic	cord	piece
9012999	closurecap, plastic	54.6830664/13.3896076	DE	Mon Oct 05 2020	Oct	2020	Oct-2020	closurecap	plastic
9012998	paper, piece	54.6836319/13.3825734	DE	Mon Oct 05 2020	Oct	2020	Oct-2020	paper	piece
9012997	piece, plastic	54.6828309/13.3891451	DE	Mon Oct 05 2020	Oct	2020	Oct-2020	piece	plastic
9012996	glass, piece	54.6835194/13.381285	DE	Mon Oct 05 2020	Oct	2020	Oct-2020	glass	piece
9012995	piece, plastic, balloonstring	54.6829946/13.3883835	DE	Mon Oct 05 2020	Oct	2020	Oct-2020	piece	plastic	balloonstring
9012994	brush	54.6835049/13.3810966	DE	Mon Oct 05 2020	Oct	2020	Oct-2020	brush
9012993	rubber, seal	54.6835582/13.3805545	DE	Mon Oct 05 2020	Oct	2020	Oct-2020	rubber	seal
9012992	plastic, straw	54.6835048/13.3809362	DE	Mon Oct 05 2020	Oct	2020	Oct-2020	plastic	straw
9012991	plastic, wrapper, piece	54.6713066/13.401752	DE	Mon Oct 05 2020	Oct	2020	Oct-2020	plastic	wrapper	piece
9012990	balloonsblow, piece	54.6835721/13.3804345	DE	Mon Oct 05 2020	Oct	2020	Oct-2020	balloonsblow	piece
9009668	candy, plastic, wrapper, leibniz, pickup, bahlsen	48.6758692190504/8.2405202463346	DE	Mon Oct 05 2020	Oct	2020	Oct-2020	candy	plastic	wrapper	leibniz	pickup	bahlsen
9009667	plastic, wrapper, leibniz, pickup, bahlsen	48.6756141577369/8.24161701836459	DE	Mon Oct 05 2020	Oct	2020	Oct-2020	plastic	wrapper	leibniz	pickup	bahlsen
9009666	plastic, wrappingfoil	48.6753784167102/8.24287271127872	DE	Mon Oct 05 2020	Oct	2020	Oct-2020	plastic	wrappingfoil
9009665	candy, plastic, wrapper, leibniz, pickup	48.674629912757/8.24360738509171	DE	Mon Oct 05 2020	Oct	2020	Oct-2020	candy	plastic	wrapper	leibniz	pickup
9009664	piece, paper	48.6746970098919/8.24372456409805	DE	Mon Oct 05 2020	Oct	2020	Oct-2020	piece	paper
9009663	plastic, foil, piece	48.6746355705417/8.24363353662961	DE	Mon Oct 05 2020	Oct	2020	Oct-2020	plastic	foil	piece
9009662	quelle	48.6749912566027/8.24386831373744	DE	Mon Oct 05 2020	Oct	2020	Oct-2020	quelle
9009661	paper, wrapper, cheesepackaging, lactosefree	48.6747835111326/8.24402966537349	DE	Mon Oct 05 2020	Oct	2020	Oct-2020	paper	wrapper	cheesepackaging	lactosefree
9009660	piece, plastic, wrapper	48.6748260492912/8.243986079477	DE	Mon Oct 05 2020	Oct	2020	Oct-2020	piece	plastic	wrapper
9009659	plastic, wrapper, cormoran, knickichter, chemicallights, coldlights	48.6753784167102/8.24287271127872	DE	Mon Oct 05 2020	Oct	2020	Oct-2020	plastic	wrapper	cormoran	knickichter	chemicallights	coldlights
9009658	candy, plastic, wrapper, leibniz, bahlsen, pickup, choco, cookie	48.6754007963917/8.24282728136353	DE	Mon Oct 05 2020	Oct	2020	Oct-2020	candy	plastic	wrapper	leibniz	bahlsen	pickup	choco	cookie
9009657	metal, plastic, bottlecap, rothaus, beer	48.6752395704842/8.24265075848274	DE	Mon Oct 05 2020	Oct	2020	Oct-2020	metal	plastic	bottlecap	rothaus	beer
9009656	plastic, wrapper, pickup, bahlsen	48.6754139978892/8.24288913980894	DE	Mon Oct 05 2020	Oct	2020	Oct-2020	plastic	wrapper	pickup	bahlsen
9009655	plastic, stick	48.672935930126/8.24898127467208	DE	Mon Oct 05 2020	Oct	2020	Oct-2020	plastic	stick
9009654	stick, plastic	48.672935930126/8.24898127467208	DE	Mon Oct 05 2020	Oct	2020	Oct-2020	stick	plastic
9009653	plastic, wrapper, pickup, bahlsen	48.672935930126/8.24898127467208	DE	Mon Oct 05 2020	Oct	2020	Oct-2020	plastic	wrapper	pickup	bahlsen
9009652	plastic, wrapper, piece	48.6728108721307/8.24587083422415	DE	Mon Oct 05 2020	Oct	2020	Oct-2020	plastic	wrapper	piece
9009651	paper, tissue	48.672935930126/8.24898127467208	DE	Mon Oct 05 2020	Oct	2020	Oct-2020	paper	tissue
9009650	plastic, seal	48.6730621615878/8.24849302881234	DE	Mon Oct 05 2020	Oct	2020	Oct-2020	plastic	seal
9009649	plastic, seal, cgfef	48.672935930126/8.24898127467208	DE	Mon Oct 05 2020	Oct	2020	Oct-2020	plastic	seal	cgfef
9009648	plastic, piece	48.6726264283514/8.24446753599517	DE	Mon Oct 05 2020	Oct	2020	Oct-2020	plastic	piece
9009647	aluminum, piece	48.6728108721307/8.24587083422415	DE	Mon Oct 05 2020	Oct	2020	Oct-2020	aluminum	piece
9009646	plastic, wrapper, pickup, bahlsen	48.6726747081137/8.24404994957917	DE	Mon Oct 05 2020	Oct	2020	Oct-2020	plastic	wrapper	pickup	bahlsen
9009645	aluminum, piece	48.673053570137/8.24545626529329	DE	Mon Oct 05 2020	Oct	2020	Oct-2020	aluminum	piece
9009644	plastic, metal, bottlecap	48.6725469679094/8.24398390018218	DE	Mon Oct 05 2020	Oct	2020	Oct-2020	plastic	metal	bottlecap
9009643	plastic, piece	48.6703045992634/8.2392059639173	DE	Mon Oct 05 2020	Oct	2020	Oct-2020	plastic	piece
9009642	plastic, wrapper, pickup, bahlsen	48.6725469679094/8.24398390018218	DE	Mon Oct 05 2020	Oct	2020	Oct-2020	plastic	wrapper	pickup	bahlsen
9009641	bottlecap, metal, plastic, rothaus, beer	48.6725066096483/8.24423154543392	DE	Mon Oct 05 2020	Oct	2020	Oct-2020	bottlecap	metal	plastic	rothaus	beer
9009640	plastic, wrapper, piece, knoppers	48.6725509074039/8.24232704938226	DE	Mon Oct 05 2020	Oct	2020	Oct-2020	plastic	wrapper	piece	knoppers
9009639	piece, plastic, wrapper	48.6727331299788/8.24237398804002	DE	Mon Oct 05 2020	Oct	2020	Oct-2020	piece	plastic	wrapper
9009638	plastic, metal, breadbagclip	48.6703045992634/8.2392059639173	DE	Mon Oct 05 2020	Oct	2020	Oct-2020	plastic	metal	breadbagclip
9009637	paper, tissue	48.6702566128677/8.23910378851764	DE	Mon Oct 05 2020	Oct	2020	Oct-2020	paper	tissue
9009636	kernzone, wood	48.6712392652861/8.24050683528952	DE	Mon Oct 05 2020	Oct	2020	Oct-2020	kernzone	wood
9009635	plastic, bandaid	48.671395001047/8.24059350416832	DE	Mon Oct 05 2020	Oct	2020	Oct-2020	plastic	bandaid
9009634	wood	48.6724176351434/8.24150486850016	DE	Mon Oct 05 2020	Oct	2020	Oct-2020	wood
9009633	plastic, wrapper, maoam	48.6720397789485/8.24124511332087	DE	Mon Oct 05 2020	Oct	2020	Oct-2020	plastic	wrapper	maoam
9009632	plastic, wrapper, maoam, brexx, maoambrexx	48.6724176351434/8.24150486850016	DE	Mon Oct 05 2020	Oct	2020	Oct-2020	plastic	wrapper	maoam	brexx	maoambrexx
9009631	plastic, shoesizetag, tag, sticker, shoesize44, no44	48.6705262586928/8.24010165409021	DE	Mon Oct 05 2020	Oct	2020	Oct-2020	plastic	shoesizetag	tag	sticker	shoesize44	no44
9009573	cigarettebutt, butt	54.2562842/12.2791843	DE	Mon Oct 05 2020	Oct	2020	Oct-2020	cigarettebutt	butt
9009562	cigarettebutt, butt	54.2562842/12.2791843	DE	Mon Oct 05 2020	Oct	2020	Oct-2020	cigarettebutt	butt
9009561	cigarettebutt, butt	54.2563302/12.2791898	DE	Mon Oct 05 2020	Oct	2020	Oct-2020	cigarettebutt	butt
9009559	cigarettebutt, butt	54.2563173/12.2791959	DE	Mon Oct 05 2020	Oct	2020	Oct-2020	cigarettebutt	butt
9009558	piece, plastic	54.2563103/12.2791879	DE	Mon Oct 05 2020	Oct	2020	Oct-2020	piece	plastic
9009556	piece, plastic	54.2563066/12.2792066	DE	Mon Oct 05 2020	Oct	2020	Oct-2020	piece	plastic
9009555	cigarettebutt, butt	54.256315/12.2791996	DE	Mon Oct 05 2020	Oct	2020	Oct-2020	cigarettebutt	butt
9009554	piece, carton	54.2563411/12.2791934	DE	Mon Oct 05 2020	Oct	2020	Oct-2020	piece	carton
9009552	cigarettebutt, butt	54.2563158/12.2792091	DE	Mon Oct 05 2020	Oct	2020	Oct-2020	cigarettebutt	butt
9009549	cigarettebutt, butt	54.2563079/12.2792071	DE	Mon Oct 05 2020	Oct	2020	Oct-2020	cigarettebutt	butt
9009548	cigarettebutt, butt	54.2563233/12.27921	DE	Mon Oct 05 2020	Oct	2020	Oct-2020	cigarettebutt	butt
9005043	butt, cigarette, cigarettebutt	54.6167279/13.3808833	DE	Mon Oct 05 2020	Oct	2020	Oct-2020	butt	cigarette	cigarettebutt
9005042	plastic, piece, candywrapper	54.6171656/13.3806805	DE	Mon Oct 05 2020	Oct	2020	Oct-2020	plastic	piece	candywrapper
9005041	tissue, paper	54.6196209/13.3791881	DE	Mon Oct 05 2020	Oct	2020	Oct-2020	tissue	paper
9005040	plastic, wrapper	54.619976/13.3776408	DE	Mon Oct 05 2020	Oct	2020	Oct-2020	plastic	wrapper
9005039	bottlecap, metal	54.6724124/13.4229716	DE	Mon Oct 05 2020	Oct	2020	Oct-2020	bottlecap	metal
9005038	gumwrapper	54.6131513/13.3755166	DE	Mon Oct 05 2020	Oct	2020	Oct-2020	gumwrapper
9005037	butt, cigarette, cigarettebutt	54.619357/13.3795352	DE	Mon Oct 05 2020	Oct	2020	Oct-2020	butt	cigarette	cigarettebutt
9005036	icecreamstick, wood	54.6193632/13.3795533	DE	Mon Oct 05 2020	Oct	2020	Oct-2020	icecreamstick	wood
9003854	plastic, drinkstrawpackaging	48.6703476403362/8.23865183629863	DE	Mon Oct 05 2020	Oct	2020	Oct-2020	plastic	drinkstrawpackaging
9003198	cigarettebutt	49.8516941808395/7.86698600961485	DE	Sun Oct 04 2020	Oct	2020	Oct-2020	cigarettebutt
9003194	cigarettebutt	49.8516999955955/7.86698106725023	DE	Sun Oct 04 2020	Oct	2020	Oct-2020	cigarettebutt
9003193	cigarettebutt	49.8516201832923/7.86699461337601	DE	Sun Oct 04 2020	Oct	2020	Oct-2020	cigarettebutt
9003192	cigarettebutt	49.8516103808223/7.86698913349314	DE	Sun Oct 04 2020	Oct	2020	Oct-2020	cigarettebutt
9003190	cigarettebutt	49.8516284943929/7.86698107126701	DE	Sun Oct 04 2020	Oct	2020	Oct-2020	cigarettebutt
9003189	cigarettebutt	49.8516007123107/7.86696384790538	DE	Sun Oct 04 2020	Oct	2020	Oct-2020	cigarettebutt
9003188	cigarettebutt	49.8516293998704/7.86699782060176	DE	Sun Oct 04 2020	Oct	2020	Oct-2020	cigarettebutt
9003187	cigarettebutt	49.8516287653434/7.86699597600222	DE	Sun Oct 04 2020	Oct	2020	Oct-2020	cigarettebutt
9003186	cigarettebutt	49.851620631183/7.8670084025735	DE	Sun Oct 04 2020	Oct	2020	Oct-2020	cigarettebutt
9003184	cigarettebutt	49.8516914161079/7.8670244735222	DE	Sun Oct 04 2020	Oct	2020	Oct-2020	cigarettebutt
9003182	cigarettebutt	49.8516294265592/7.86703700647011	DE	Sun Oct 04 2020	Oct	2020	Oct-2020	cigarettebutt
9003181	cigarettebutt	49.8516305065175/7.86704498058191	DE	Sun Oct 04 2020	Oct	2020	Oct-2020	cigarettebutt
9003180	cigarettebutt	49.8516914161079/7.8670244735222	DE	Sun Oct 04 2020	Oct	2020	Oct-2020	cigarettebutt
9003175	cigarettebutt	49.8517168065247/7.8669707519521	DE	Sun Oct 04 2020	Oct	2020	Oct-2020	cigarettebutt
9002530	cigarettebutt	49.8520278191731/7.86697700720911	DE	Sun Oct 04 2020	Oct	2020	Oct-2020	cigarettebutt
9002529	cigarettebutt	49.8520291026028/7.8669710081065	DE	Sun Oct 04 2020	Oct	2020	Oct-2020	cigarettebutt
9002528	cigarettebutt	49.8520303636302/7.86695843482898	DE	Sun Oct 04 2020	Oct	2020	Oct-2020	cigarettebutt
9002527	cigarettebutt	49.85202209555/7.86697820698231	DE	Sun Oct 04 2020	Oct	2020	Oct-2020	cigarettebutt
9002526	cigarettebutt	49.8520316423591/7.86696937089319	DE	Sun Oct 04 2020	Oct	2020	Oct-2020	cigarettebutt
9002525	cigarettebutt	49.8520227997391/7.86696753594898	DE	Sun Oct 04 2020	Oct	2020	Oct-2020	cigarettebutt
9002524	cigarettebutt	49.8520132416737/7.86696202149527	DE	Sun Oct 04 2020	Oct	2020	Oct-2020	cigarettebutt
9002523	cigarettebutt	49.8520149406784/7.86696122293273	DE	Sun Oct 04 2020	Oct	2020	Oct-2020	cigarettebutt
9002522	cigarettebutt	49.8520165594852/7.8669498325358	DE	Sun Oct 04 2020	Oct	2020	Oct-2020	cigarettebutt
9002521	cigarettebutt	49.852027455549/7.8669492954814	DE	Sun Oct 04 2020	Oct	2020	Oct-2020	cigarettebutt
9002519	cigarettebutt	49.8520166765146/7.86694293560642	DE	Sun Oct 04 2020	Oct	2020	Oct-2020	cigarettebutt
9002518	cigarettebutt	49.8520173855049/7.86694034904622	DE	Sun Oct 04 2020	Oct	2020	Oct-2020	cigarettebutt
9002517	cigarettebutt	49.8520161462788/7.86694777018242	DE	Sun Oct 04 2020	Oct	2020	Oct-2020	cigarettebutt
9002516	cigarettebutt	49.8520090268757/7.86695860099874	DE	Sun Oct 04 2020	Oct	2020	Oct-2020	cigarettebutt
9002515	cigarettebutt	49.8520198820639/7.86695187093183	DE	Sun Oct 04 2020	Oct	2020	Oct-2020	cigarettebutt
9002514	cigarettebutt	49.8520217047176/7.86695639127106	DE	Sun Oct 04 2020	Oct	2020	Oct-2020	cigarettebutt
9002513	cigarettebutt	49.8520168714609/7.86697085020288	DE	Sun Oct 04 2020	Oct	2020	Oct-2020	cigarettebutt
9002511	cigarettebutt	49.852019743942/7.86697056734596	DE	Sun Oct 04 2020	Oct	2020	Oct-2020	cigarettebutt
9002509	cigarettebutt	49.8520058685772/7.86698109234725	DE	Sun Oct 04 2020	Oct	2020	Oct-2020	cigarettebutt
9002508	cigarettebutt	49.8520058685772/7.86698109234725	DE	Sun Oct 04 2020	Oct	2020	Oct-2020	cigarettebutt
9002506	cigarettebutt	49.8520129067579/7.86697217668006	DE	Sun Oct 04 2020	Oct	2020	Oct-2020	cigarettebutt
9002505	cigarettebutt	49.8520783355067/7.86692149403534	DE	Sun Oct 04 2020	Oct	2020	Oct-2020	cigarettebutt
9002502	cigarettebutt	49.852063596552/7.8669101837116	DE	Sun Oct 04 2020	Oct	2020	Oct-2020	cigarettebutt
9002500	cigarettebutt	49.8520727475994/7.86691832079959	DE	Sun Oct 04 2020	Oct	2020	Oct-2020	cigarettebutt
9002499	cigarettebutt	49.8520721313668/7.86690771029881	DE	Sun Oct 04 2020	Oct	2020	Oct-2020	cigarettebutt
9002498	cigarettebutt	49.8521053926902/7.86691948520149	DE	Sun Oct 04 2020	Oct	2020	Oct-2020	cigarettebutt
9002494	cigarettebutt	49.8520829758594/7.86689616686921	DE	Sun Oct 04 2020	Oct	2020	Oct-2020	cigarettebutt
9002493	cigarettebutt	49.8520688971206/7.86695199383935	DE	Sun Oct 04 2020	Oct	2020	Oct-2020	cigarettebutt
9002492	cigarettebutt	49.8520608429172/7.86688353296753	DE	Sun Oct 04 2020	Oct	2020	Oct-2020	cigarettebutt
9002491	cigarettebutt	49.8520843726337/7.86692647534919	DE	Sun Oct 04 2020	Oct	2020	Oct-2020	cigarettebutt
9002490	cigarettebutt	49.8520526468097/7.86688428167319	DE	Sun Oct 04 2020	Oct	2020	Oct-2020	cigarettebutt
9002489	cigarettebutt	49.8520634611625/7.86695027659811	DE	Sun Oct 04 2020	Oct	2020	Oct-2020	cigarettebutt
9002488	cigarettebutt	49.8520516708711/7.86693828613621	DE	Sun Oct 04 2020	Oct	2020	Oct-2020	cigarettebutt
9002487	cigarettebutt	49.8520516708711/7.86693828613621	DE	Sun Oct 04 2020	Oct	2020	Oct-2020	cigarettebutt
9002486	cigarettebutt	49.8520797627892/7.86695959177556	DE	Sun Oct 04 2020	Oct	2020	Oct-2020	cigarettebutt
9002485	cigarettebutt	49.8520504213875/7.86695300680423	DE	Sun Oct 04 2020	Oct	2020	Oct-2020	cigarettebutt
9002475	cigarettebutt	49.8520153968046/7.86706598367328	DE	Sun Oct 04 2020	Oct	2020	Oct-2020	cigarettebutt
9002473	cigarettebutt	49.8520245651015/7.86707569547328	DE	Sun Oct 04 2020	Oct	2020	Oct-2020	cigarettebutt
9002456	cigarettebutt	49.8519115630153/7.86713836444006	DE	Sun Oct 04 2020	Oct	2020	Oct-2020	cigarettebutt
9002450	cigarettebutt	49.851902871608/7.86715240378158	DE	Sun Oct 04 2020	Oct	2020	Oct-2020	cigarettebutt
9002448	cigarettebutt	49.8519098684081/7.86715954058546	DE	Sun Oct 04 2020	Oct	2020	Oct-2020	cigarettebutt
9002447	cigarettebutt	49.8518935601021/7.86716704034668	DE	Sun Oct 04 2020	Oct	2020	Oct-2020	cigarettebutt
9002446	cigarettebutt	49.851886994064/7.86715432680792	DE	Sun Oct 04 2020	Oct	2020	Oct-2020	cigarettebutt
9002445	cigarettebutt	49.851910281926/7.86715285193688	DE	Sun Oct 04 2020	Oct	2020	Oct-2020	cigarettebutt
9002444	cigarettebutt	49.8518847619784/7.86716519247528	DE	Sun Oct 04 2020	Oct	2020	Oct-2020	cigarettebutt
9002443	cigarettebutt	49.8518753489399/7.86713059415141	DE	Sun Oct 04 2020	Oct	2020	Oct-2020	cigarettebutt
9002442	cigarettebutt	49.8516790309768/7.86721391620537	DE	Sun Oct 04 2020	Oct	2020	Oct-2020	cigarettebutt
9002441	cigarettebutt	49.8519144251385/7.86717882504627	DE	Sun Oct 04 2020	Oct	2020	Oct-2020	cigarettebutt
9002440	cigarettebutt	49.8518444894755/7.8672268530041	DE	Sun Oct 04 2020	Oct	2020	Oct-2020	cigarettebutt
9002439	cigarettebutt	49.8518784253551/7.86711751703789	DE	Sun Oct 04 2020	Oct	2020	Oct-2020	cigarettebutt
9002438	cigarettebutt	49.851843086036/7.86715623627389	DE	Sun Oct 04 2020	Oct	2020	Oct-2020	cigarettebutt
9002437	cigarettebutt	49.851843086036/7.86715623627389	DE	Sun Oct 04 2020	Oct	2020	Oct-2020	cigarettebutt
9002399	cigarettebutt	49.8518526728663/7.8671593789215	DE	Sun Oct 04 2020	Oct	2020	Oct-2020	cigarettebutt
9002398	cigarettebutt	49.8518376929366/7.86712842871825	DE	Sun Oct 04 2020	Oct	2020	Oct-2020	cigarettebutt
9002397	cigarettebutt	49.8518466122084/7.86713022007024	DE	Sun Oct 04 2020	Oct	2020	Oct-2020	cigarettebutt
9002395	cigarettebutt	49.8518447990227/7.86712961141776	DE	Sun Oct 04 2020	Oct	2020	Oct-2020	cigarettebutt
9002394	cigarettebutt	49.8518364530544/7.8671591741412	DE	Sun Oct 04 2020	Oct	2020	Oct-2020	cigarettebutt
9002392	cigarettebutt	49.8518498465431/7.86717387544948	DE	Sun Oct 04 2020	Oct	2020	Oct-2020	cigarettebutt
9002390	cigarettebutt	49.8518494424494/7.86714724471131	DE	Sun Oct 04 2020	Oct	2020	Oct-2020	cigarettebutt
9002389	cigarettebutt	49.8518579955167/7.8671701878134	DE	Sun Oct 04 2020	Oct	2020	Oct-2020	cigarettebutt
9002388	cigarettebutt	49.8518519345892/7.86718137044075	DE	Sun Oct 04 2020	Oct	2020	Oct-2020	cigarettebutt
9002387	cigarettebutt	49.8518562686148/7.86716633076958	DE	Sun Oct 04 2020	Oct	2020	Oct-2020	cigarettebutt
9002386	cigarettebutt	49.8518744729805/7.86710857836004	DE	Sun Oct 04 2020	Oct	2020	Oct-2020	cigarettebutt
9002385	cigarettebutt	49.8518535390238/7.86717022408127	DE	Sun Oct 04 2020	Oct	2020	Oct-2020	cigarettebutt
9002384	cigarettebutt	49.8518474101901/7.86715985626724	DE	Sun Oct 04 2020	Oct	2020	Oct-2020	cigarettebutt
9002383	cigarettebutt	49.8518288233297/7.86720956326903	DE	Sun Oct 04 2020	Oct	2020	Oct-2020	cigarettebutt
9002382	cigarettebutt	49.8518744729805/7.86710857836004	DE	Sun Oct 04 2020	Oct	2020	Oct-2020	cigarettebutt
9002380	cigarettebutt	49.8518660234185/7.86712559963687	DE	Sun Oct 04 2020	Oct	2020	Oct-2020	cigarettebutt
9002378	cigarettebutt	49.8518749847464/7.86711714787293	DE	Sun Oct 04 2020	Oct	2020	Oct-2020	cigarettebutt
9002377	cigarettebutt	49.8518769639647/7.86711332313268	DE	Sun Oct 04 2020	Oct	2020	Oct-2020	cigarettebutt
9002376	cigarettebutt	49.8519813334042/7.86710188136857	DE	Sun Oct 04 2020	Oct	2020	Oct-2020	cigarettebutt
9002375	cigarettebutt	49.8519813334042/7.86710188136857	DE	Sun Oct 04 2020	Oct	2020	Oct-2020	cigarettebutt
9002374	cigarettebutt	49.8518809245074/7.86715085077486	DE	Sun Oct 04 2020	Oct	2020	Oct-2020	cigarettebutt
9002366	cigarettebutt	49.8518697102056/7.8671041992791	DE	Sun Oct 04 2020	Oct	2020	Oct-2020	cigarettebutt
9002365	cigarettebutt	49.8518786230451/7.86709155440342	DE	Sun Oct 04 2020	Oct	2020	Oct-2020	cigarettebutt
9002364	cigarettebutt	49.8518751348745/7.86711878852589	DE	Sun Oct 04 2020	Oct	2020	Oct-2020	cigarettebutt
9002363	cigarettebutt	49.8514526748603/7.86757620944703	DE	Sun Oct 04 2020	Oct	2020	Oct-2020	cigarettebutt
9002362	cigarettebutt	49.8518734881531/7.86709496104655	DE	Sun Oct 04 2020	Oct	2020	Oct-2020	cigarettebutt
9002361	cigarettebutt	49.851875088759/7.86709089278497	DE	Sun Oct 04 2020	Oct	2020	Oct-2020	cigarettebutt
9002360	cigarettebutt	49.851874250357/7.86708679176059	DE	Sun Oct 04 2020	Oct	2020	Oct-2020	cigarettebutt
9002359	cigarettebutt	49.8518838362639/7.8670789694368	DE	Sun Oct 04 2020	Oct	2020	Oct-2020	cigarettebutt
9002358	cigarettebutt	49.8518814510066/7.86708620735219	DE	Sun Oct 04 2020	Oct	2020	Oct-2020	cigarettebutt
9002357	cigarettebutt	49.8518770882281/7.86709443386274	DE	Sun Oct 04 2020	Oct	2020	Oct-2020	cigarettebutt
9002355	cigarettebutt	49.8518805382797/7.86707403093008	DE	Sun Oct 04 2020	Oct	2020	Oct-2020	cigarettebutt
9002354	cigarettebutt	49.8518848706159/7.86709753109552	DE	Sun Oct 04 2020	Oct	2020	Oct-2020	cigarettebutt
9002352	cigarettebutt	49.8518894435026/7.86711059463548	DE	Sun Oct 04 2020	Oct	2020	Oct-2020	cigarettebutt
9002351	cigarettebutt	49.8518909540698/7.86711092487571	DE	Sun Oct 04 2020	Oct	2020	Oct-2020	cigarettebutt
9002350	cigarettebutt	49.8518997805298/7.86711565077912	DE	Sun Oct 04 2020	Oct	2020	Oct-2020	cigarettebutt
9002348	cigarettebutt	49.8518861934275/7.86712514827232	DE	Sun Oct 04 2020	Oct	2020	Oct-2020	cigarettebutt
9002347	cigarettebutt	49.851889531054/7.86713339839125	DE	Sun Oct 04 2020	Oct	2020	Oct-2020	cigarettebutt
9002346	cigarettebutt	49.8518981218113/7.86706100031935	DE	Sun Oct 04 2020	Oct	2020	Oct-2020	cigarettebutt
9002345	cigarettebutt	49.851889531054/7.86713339839125	DE	Sun Oct 04 2020	Oct	2020	Oct-2020	cigarettebutt
9002344	cigarettebutt	49.8518720835035/7.86705415557518	DE	Sun Oct 04 2020	Oct	2020	Oct-2020	cigarettebutt
9002341	cigarettebutt	49.8516943190422/7.86706265263264	DE	Sun Oct 04 2020	Oct	2020	Oct-2020	cigarettebutt
9002340	cigarettebutt	49.8518821878004/7.86705265400883	DE	Sun Oct 04 2020	Oct	2020	Oct-2020	cigarettebutt
9002339	cigarettebutt	49.8518821878004/7.86705265400883	DE	Sun Oct 04 2020	Oct	2020	Oct-2020	cigarettebutt
9002338	cigarettebutt	49.8518784212248/7.8670490124011	DE	Sun Oct 04 2020	Oct	2020	Oct-2020	cigarettebutt
9002337	cigarettebutt	49.8518764695707/7.86704935081224	DE	Sun Oct 04 2020	Oct	2020	Oct-2020	cigarettebutt
9002336	cigarettebutt	49.8518799905287/7.86704970477477	DE	Sun Oct 04 2020	Oct	2020	Oct-2020	cigarettebutt
9002335	cigarettebutt	49.8518787197922/7.86704495766859	DE	Sun Oct 04 2020	Oct	2020	Oct-2020	cigarettebutt
9002334	cigarettebutt	49.8518738765159/7.86703287435479	DE	Sun Oct 04 2020	Oct	2020	Oct-2020	cigarettebutt
9002333	cigarettebutt	49.8518899440223/7.86707126755507	DE	Sun Oct 04 2020	Oct	2020	Oct-2020	cigarettebutt
9002332	cigarettebutt	49.8518804329401/7.86710513592415	DE	Sun Oct 04 2020	Oct	2020	Oct-2020	cigarettebutt
9002331	cigarettebutt	49.8518897738555/7.86698113510898	DE	Sun Oct 04 2020	Oct	2020	Oct-2020	cigarettebutt
9002329	cigarettebutt	49.8518897738555/7.86698113510898	DE	Sun Oct 04 2020	Oct	2020	Oct-2020	cigarettebutt
9002328	cigarettebutt	49.8518981312294/7.86703563642229	DE	Sun Oct 04 2020	Oct	2020	Oct-2020	cigarettebutt
9002327	cigarettebutt	49.8518829813973/7.86705789850631	DE	Sun Oct 04 2020	Oct	2020	Oct-2020	cigarettebutt
9002326	cigarettebutt	49.8518689363988/7.86706410220657	DE	Sun Oct 04 2020	Oct	2020	Oct-2020	cigarettebutt
9002325	cigarettebutt	49.8518673735051/7.86705377025215	DE	Sun Oct 04 2020	Oct	2020	Oct-2020	cigarettebutt
9002324	cigarettebutt	49.8518673735051/7.86705377025215	DE	Sun Oct 04 2020	Oct	2020	Oct-2020	cigarettebutt
9002323	cigarettebutt	49.8518679665799/7.86702877779044	DE	Sun Oct 04 2020	Oct	2020	Oct-2020	cigarettebutt
9002322	cigarettebutt	49.8518693916277/7.86711415628541	DE	Sun Oct 04 2020	Oct	2020	Oct-2020	cigarettebutt
9002320	cigarettebutt	49.851889707314/7.86714671516499	DE	Sun Oct 04 2020	Oct	2020	Oct-2020	cigarettebutt
9002318	cigarettebutt	49.851889707314/7.86714671516499	DE	Sun Oct 04 2020	Oct	2020	Oct-2020	cigarettebutt
9002317	cigarettebutt	49.8518293254866/7.86717117217628	DE	Sun Oct 04 2020	Oct	2020	Oct-2020	cigarettebutt
9002316	cigarettebutt	49.851892795005/7.86702564817828	DE	Sun Oct 04 2020	Oct	2020	Oct-2020	cigarettebutt
9002315	cigarettebutt	49.8519085019187/7.86703418442859	DE	Sun Oct 04 2020	Oct	2020	Oct-2020	cigarettebutt
9002312	cigarettebutt	49.8519085019187/7.86703418442859	DE	Sun Oct 04 2020	Oct	2020	Oct-2020	cigarettebutt
9002311	cigarettebutt	49.8518970878105/7.86701505908809	DE	Sun Oct 04 2020	Oct	2020	Oct-2020	cigarettebutt
9002310	cigarettebutt	49.8518757421529/7.86701125251244	DE	Sun Oct 04 2020	Oct	2020	Oct-2020	cigarettebutt
9002309	cigarettebutt	49.8518591850143/7.86708775677592	DE	Sun Oct 04 2020	Oct	2020	Oct-2020	cigarettebutt
9002308	cigarettebutt	49.8518591850143/7.86708775677592	DE	Sun Oct 04 2020	Oct	2020	Oct-2020	cigarettebutt
9002305	cigarettebutt	49.8518638096394/7.8670698397409	DE	Sun Oct 04 2020	Oct	2020	Oct-2020	cigarettebutt
9002304	cigarettebutt	49.8518569497348/7.867077957633	DE	Sun Oct 04 2020	Oct	2020	Oct-2020	cigarettebutt
9002303	cigarettebutt	49.8518582815703/7.86707553545475	DE	Sun Oct 04 2020	Oct	2020	Oct-2020	cigarettebutt
9002302	cigarettebutt	49.8518582815703/7.86707553545475	DE	Sun Oct 04 2020	Oct	2020	Oct-2020	cigarettebutt
9002300	cigarettebutt	49.8519058731323/7.86710353282596	DE	Sun Oct 04 2020	Oct	2020	Oct-2020	cigarettebutt
9002299	cigarettebutt	49.851872538913/7.86710927486818	DE	Sun Oct 04 2020	Oct	2020	Oct-2020	cigarettebutt
9002298	cigarettebutt	49.8519037230905/7.8670348020019	DE	Sun Oct 04 2020	Oct	2020	Oct-2020	cigarettebutt
9002297	cigarettebutt	49.8519037230905/7.8670348020019	DE	Sun Oct 04 2020	Oct	2020	Oct-2020	cigarettebutt
9002296	cigarettebutt	49.8519037230905/7.8670348020019	DE	Sun Oct 04 2020	Oct	2020	Oct-2020	cigarettebutt
9002295	cigarettebutt	49.8519037230905/7.8670348020019	DE	Sun Oct 04 2020	Oct	2020	Oct-2020	cigarettebutt
9002294	cigarettebutt	49.8519037230905/7.8670348020019	DE	Sun Oct 04 2020	Oct	2020	Oct-2020	cigarettebutt
9002290	cigarettebutt	49.8518821621284/7.86705243166957	DE	Sun Oct 04 2020	Oct	2020	Oct-2020	cigarettebutt
9002289	cigarettebutt	49.8518710538147/7.86706624992	DE	Sun Oct 04 2020	Oct	2020	Oct-2020	cigarettebutt
9002288	cigarettebutt	49.8518684356379/7.86705758350538	DE	Sun Oct 04 2020	Oct	2020	Oct-2020	cigarettebutt
9002287	cigarettebutt	49.8518696379679/7.86705854964225	DE	Sun Oct 04 2020	Oct	2020	Oct-2020	cigarettebutt
9002286	cigarettebutt	49.8518803476912/7.86706095225335	DE	Sun Oct 04 2020	Oct	2020	Oct-2020	cigarettebutt
9002285	cigarettebutt	49.8518646547413/7.86705622800599	DE	Sun Oct 04 2020	Oct	2020	Oct-2020	cigarettebutt
9002284	cigarettebutt	49.8518756191616/7.86708863866467	DE	Sun Oct 04 2020	Oct	2020	Oct-2020	cigarettebutt
9002283	cigarettebutt	49.8518965728024/7.86708434516119	DE	Sun Oct 04 2020	Oct	2020	Oct-2020	cigarettebutt
9002282	cigarettebutt	49.8518988429228/7.8669854173424	DE	Sun Oct 04 2020	Oct	2020	Oct-2020	cigarettebutt
9002280	cigarettebutt	49.8518988429228/7.8669854173424	DE	Sun Oct 04 2020	Oct	2020	Oct-2020	cigarettebutt
9002279	cigarettebutt	49.8518860679068/7.86704363817847	DE	Sun Oct 04 2020	Oct	2020	Oct-2020	cigarettebutt
9002276	cigarettebutt	49.8518912566263/7.86702592779542	DE	Sun Oct 04 2020	Oct	2020	Oct-2020	cigarettebutt
9002275	cigarettebutt	49.8518918911481/7.86704928766435	DE	Sun Oct 04 2020	Oct	2020	Oct-2020	cigarettebutt
9002273	cigarettebutt	49.8518940614534/7.86703872953646	DE	Sun Oct 04 2020	Oct	2020	Oct-2020	cigarettebutt
9002272	cigarettebutt	49.8519186874643/7.86705220686666	DE	Sun Oct 04 2020	Oct	2020	Oct-2020	cigarettebutt
9002271	cigarettebutt	49.8519151059497/7.86706590482969	DE	Sun Oct 04 2020	Oct	2020	Oct-2020	cigarettebutt
9002269	cigarettebutt	49.8519108133718/7.86705305189089	DE	Sun Oct 04 2020	Oct	2020	Oct-2020	cigarettebutt
9002267	cigarettebutt	49.8518870522845/7.86704754452042	DE	Sun Oct 04 2020	Oct	2020	Oct-2020	cigarettebutt
9002264	cigarettebutt	49.8518847118314/7.8670577994238	DE	Sun Oct 04 2020	Oct	2020	Oct-2020	cigarettebutt
9002263	cigarettebutt	49.851884586603/7.86706073960026	DE	Sun Oct 04 2020	Oct	2020	Oct-2020	cigarettebutt
9002262	cigarettebutt	49.8518847118314/7.8670577994238	DE	Sun Oct 04 2020	Oct	2020	Oct-2020	cigarettebutt
9002261	cigarettebutt	49.8518847118314/7.8670577994238	DE	Sun Oct 04 2020	Oct	2020	Oct-2020	cigarettebutt
9002260	cigarettebutt	49.8519064256606/7.86708755057417	DE	Sun Oct 04 2020	Oct	2020	Oct-2020	cigarettebutt
9002259	cigarettebutt	49.8518981667738/7.86703094406637	DE	Sun Oct 04 2020	Oct	2020	Oct-2020	cigarettebutt
9002258	cigarettebutt	49.8518981667738/7.86703094406637	DE	Sun Oct 04 2020	Oct	2020	Oct-2020	cigarettebutt
9002257	cigarettebutt	49.8518947356864/7.8670233606418	DE	Sun Oct 04 2020	Oct	2020	Oct-2020	cigarettebutt
9002256	cigarettebutt	49.8518973884206/7.8670224096555	DE	Sun Oct 04 2020	Oct	2020	Oct-2020	cigarettebutt
9002255	cigarettebutt	49.8518973884206/7.8670224096555	DE	Sun Oct 04 2020	Oct	2020	Oct-2020	cigarettebutt
9002254	cigarettebutt	49.8519181532424/7.86704849655461	DE	Sun Oct 04 2020	Oct	2020	Oct-2020	cigarettebutt
9002253	cigarettebutt	49.8519236491518/7.86703864940928	DE	Sun Oct 04 2020	Oct	2020	Oct-2020	cigarettebutt
9002252	cigarettebutt	49.8519213615813/7.86703805025877	DE	Sun Oct 04 2020	Oct	2020	Oct-2020	cigarettebutt
9002250	cigarettebutt	49.8518949440722/7.86706310297277	DE	Sun Oct 04 2020	Oct	2020	Oct-2020	cigarettebutt
9002249	cigarettebutt	49.8518943212264/7.86704237475083	DE	Sun Oct 04 2020	Oct	2020	Oct-2020	cigarettebutt
9002247	cigarettebutt	49.8518904173212/7.86703283722281	DE	Sun Oct 04 2020	Oct	2020	Oct-2020	cigarettebutt
9002246	cigarettebutt	49.8518949477709/7.86701228219396	DE	Sun Oct 04 2020	Oct	2020	Oct-2020	cigarettebutt
9002244	cigarettebutt	49.85189320227/7.86695996183118	DE	Sun Oct 04 2020	Oct	2020	Oct-2020	cigarettebutt
9002243	cigarettebutt	49.8519008972158/7.86706625763824	DE	Sun Oct 04 2020	Oct	2020	Oct-2020	cigarettebutt
9002242	cigarettebutt	49.8518594255882/7.86728306099482	DE	Sun Oct 04 2020	Oct	2020	Oct-2020	cigarettebutt
9002239	cigarettebutt	49.8518981118901/7.86702436804203	DE	Sun Oct 04 2020	Oct	2020	Oct-2020	cigarettebutt
9002238	cigarettebutt	49.8518920543412/7.86702058395431	DE	Sun Oct 04 2020	Oct	2020	Oct-2020	cigarettebutt
9002237	cigarettebutt	49.8518951107858/7.86702264668441	DE	Sun Oct 04 2020	Oct	2020	Oct-2020	cigarettebutt
9002236	cigarettebutt	49.8518994000054/7.86701912117394	DE	Sun Oct 04 2020	Oct	2020	Oct-2020	cigarettebutt
9002234	cigarettebutt	49.8518736968728/7.86705101155004	DE	Sun Oct 04 2020	Oct	2020	Oct-2020	cigarettebutt
9002233	cigarettebutt	49.8519005916047/7.86701802978913	DE	Sun Oct 04 2020	Oct	2020	Oct-2020	cigarettebutt
9002231	cigarettebutt	49.8518736968728/7.86705101155004	DE	Sun Oct 04 2020	Oct	2020	Oct-2020	cigarettebutt
9002230	cigarettebutt	49.8519259233682/7.86698092123382	DE	Sun Oct 04 2020	Oct	2020	Oct-2020	cigarettebutt
9002229	cigarettebutt	49.8519340298756/7.86695637603281	DE	Sun Oct 04 2020	Oct	2020	Oct-2020	cigarettebutt
9002228	cigarettebutt	49.8519353184016/7.86695652934776	DE	Sun Oct 04 2020	Oct	2020	Oct-2020	cigarettebutt
9002227	cigarettebutt	49.8519005916047/7.86701802978913	DE	Sun Oct 04 2020	Oct	2020	Oct-2020	cigarettebutt
9002225	cigarettebutt	49.851903738153/7.86714249094701	DE	Sun Oct 04 2020	Oct	2020	Oct-2020	cigarettebutt
9002224	cigarettebutt	49.8519276307822/7.86702446063397	DE	Sun Oct 04 2020	Oct	2020	Oct-2020	cigarettebutt
9002223	cigarettebutt	49.8519276307822/7.86702446063397	DE	Sun Oct 04 2020	Oct	2020	Oct-2020	cigarettebutt
9002220	cigarettebutt	49.8519359252672/7.8670597719398	DE	Sun Oct 04 2020	Oct	2020	Oct-2020	cigarettebutt
9002218	cigarettebutt	49.8519364068056/7.86696264856484	DE	Sun Oct 04 2020	Oct	2020	Oct-2020	cigarettebutt
8974900	plastic, piece	54.6208873/13.3774567	DE	Sun Oct 04 2020	Oct	2020	Oct-2020	plastic	piece
8974899	paper, candywrapper	54.6211614/13.3773927	DE	Sun Oct 04 2020	Oct	2020	Oct-2020	paper	candywrapper
8974898	paper, piece	54.6211831/13.3773625	DE	Sun Oct 04 2020	Oct	2020	Oct-2020	paper	piece
8974897	paper, sanifair	54.6207418/13.3782143	DE	Sun Oct 04 2020	Oct	2020	Oct-2020	paper	sanifair
8967296	cup, mcdonalds, paper	49.5891017/8.4579682	DE	Thu Oct 01 2020	Oct	2020	Oct-2020	cup	mcdonalds	paper
8967288	cigarette, pack, paper, l&m	49.1006832/9.8385407	DE	Thu Oct 01 2020	Oct	2020	Oct-2020	cigarette	pack	paper	l&m
8967284	bottlecap, plastic	49.1006913/9.8385559	DE	Thu Oct 01 2020	Oct	2020	Oct-2020	bottlecap	plastic
8962576	lolliestokje, plastic	50.10896383/6.72701167	DE	Sun Oct 04 2020	Oct	2020	Oct-2020	lolliestokje	plastic
8962109	facemask	49.415698674839/11.0426157237172	DE	Sun Oct 04 2020	Oct	2020	Oct-2020	facemask
8962108	plastic, bottle	49.4154251618811/11.0432119176756	DE	Sun Oct 04 2020	Oct	2020	Oct-2020	plastic	bottle
8962107	mcdonalds	49.4165450729085/11.0370020180417	DE	Sun Oct 04 2020	Oct	2020	Oct-2020	mcdonalds
8962106	plastic, bag	49.4165998000383/11.0372734604075	DE	Sun Oct 04 2020	Oct	2020	Oct-2020	plastic	bag
8962105	paper	49.4169173660627/11.0415315323907	DE	Sun Oct 04 2020	Oct	2020	Oct-2020	paper
8961193	cigarettebutt, butt	54.3324793/12.3745169	DE	Sat Oct 03 2020	Oct	2020	Oct-2020	cigarettebutt	butt
8961192	cigarettebutt, butt	54.3324805/12.3745114	DE	Sat Oct 03 2020	Oct	2020	Oct-2020	cigarettebutt	butt
8961191	cigarettebutt, butt	54.2525228/12.3279518	DE	Sat Oct 03 2020	Oct	2020	Oct-2020	cigarettebutt	butt
8961190	cigarettebutt, butt	54.3324782/12.3744998	DE	Sat Oct 03 2020	Oct	2020	Oct-2020	cigarettebutt	butt
8961189	cigarettebutt, butt	54.2525228/12.3279518	DE	Sat Oct 03 2020	Oct	2020	Oct-2020	cigarettebutt	butt
8961185	cigarettebutt, butt	54.4141846/12.6090076	DE	Sun Oct 04 2020	Oct	2020	Oct-2020	cigarettebutt	butt
8961184	butt, cigarettebutt	54.4141846/12.6090076	DE	Sun Oct 04 2020	Oct	2020	Oct-2020	butt	cigarettebutt
8961183	cigarettebutt, butt	54.3324965/12.3744591	DE	Sat Oct 03 2020	Oct	2020	Oct-2020	cigarettebutt	butt
8961182	cigarettebutt, butt	54.2525228/12.3279518	DE	Sat Oct 03 2020	Oct	2020	Oct-2020	cigarettebutt	butt
8961176	cigarettebutt, butt	54.3318353/12.3734923	DE	Sat Oct 03 2020	Oct	2020	Oct-2020	cigarettebutt	butt
8961174	paper, parkingticket	54.332379/12.3754215	DE	Sat Oct 03 2020	Oct	2020	Oct-2020	paper	parkingticket
8961173	cigarettebutt, butt	54.3318353/12.3734923	DE	Sat Oct 03 2020	Oct	2020	Oct-2020	cigarettebutt	butt
8961172	cigarettebutt, butt	54.332478/12.3747261	DE	Sat Oct 03 2020	Oct	2020	Oct-2020	cigarettebutt	butt
8961171	cigarettebutt, butt	54.3324261/12.374593	DE	Sat Oct 03 2020	Oct	2020	Oct-2020	cigarettebutt	butt
8961170	cigarettebutt, butt	54.3324152/12.3746484	DE	Sat Oct 03 2020	Oct	2020	Oct-2020	cigarettebutt	butt
8961169	cigarettebutt, butt	54.3324321/12.3745857	DE	Sat Oct 03 2020	Oct	2020	Oct-2020	cigarettebutt	butt
8961168	cigarettebutt, butt	54.3318353/12.3734923	DE	Sat Oct 03 2020	Oct	2020	Oct-2020	cigarettebutt	butt
8961167	cigarettebutt, butt	54.3324728/12.37471	DE	Sat Oct 03 2020	Oct	2020	Oct-2020	cigarettebutt	butt
8961166	cigarettebutt, butt	54.3324038/12.3746292	DE	Sat Oct 03 2020	Oct	2020	Oct-2020	cigarettebutt	butt
8961165	cigarettebutt, butt	54.3321874/12.373333	DE	Sat Oct 03 2020	Oct	2020	Oct-2020	cigarettebutt	butt
8961164	cigarettebutt, butt	54.3324576/12.3745643	DE	Sat Oct 03 2020	Oct	2020	Oct-2020	cigarettebutt	butt
8961163	cigarettebutt, butt	54.3321605/12.3732213	DE	Sat Oct 03 2020	Oct	2020	Oct-2020	cigarettebutt	butt
8961162	cigarettebutt, butt	54.3324638/12.3745557	DE	Sat Oct 03 2020	Oct	2020	Oct-2020	cigarettebutt	butt
8961161	paper, parkingticket	54.3322012/12.3732023	DE	Sat Oct 03 2020	Oct	2020	Oct-2020	paper	parkingticket
8958751	candywrapper, ferrero	49.1250959733104/8.59976195865032	DE	Sun Oct 04 2020	Oct	2020	Oct-2020	candywrapper	ferrero
8958477	can, mountaindew	49.1246837136989/8.60125071397452	DE	Sun Oct 04 2020	Oct	2020	Oct-2020	can	mountaindew
8958476	paper	49.1247447847675/8.60127999833986	DE	Sun Oct 04 2020	Oct	2020	Oct-2020	paper
8958475	coffeecup	49.1246306225349/8.60133118808922	DE	Sun Oct 04 2020	Oct	2020	Oct-2020	coffeecup
8957446	candywrapper, plastic	49.1249815580833/8.60116587564335	DE	Sun Oct 04 2020	Oct	2020	Oct-2020	candywrapper	plastic
8957364	cigarettepack, paper	49.1249894248267/8.60128940090071	DE	Sun Oct 04 2020	Oct	2020	Oct-2020	cigarettepack	paper
8957359	plastic, bag	49.1249894248267/8.60128940090071	DE	Sun Oct 04 2020	Oct	2020	Oct-2020	plastic	bag
8957357	candywrapper, plastic	49.1249630998457/8.60117998371353	DE	Sun Oct 04 2020	Oct	2020	Oct-2020	candywrapper	plastic
8957265	candy, plastic, wrapper, pickup	49.1250148799544/8.60124603642754	DE	Sun Oct 04 2020	Oct	2020	Oct-2020	candy	plastic	wrapper	pickup
8957263	plastic	49.1250148799544/8.60124603642754	DE	Sun Oct 04 2020	Oct	2020	Oct-2020	plastic
8957259	candy, plastic, wrapper	49.1251146156916/8.6013157563987	DE	Sun Oct 04 2020	Oct	2020	Oct-2020	candy	plastic	wrapper
8957208	plastic	49.1252076305272/8.60168754735487	DE	Sun Oct 04 2020	Oct	2020	Oct-2020	plastic
8957194	plastic	49.1257788242523/8.60165524995241	DE	Sun Oct 04 2020	Oct	2020	Oct-2020	plastic
8957163	tissue	49.1259395234776/8.60165157967285	DE	Sun Oct 04 2020	Oct	2020	Oct-2020	tissue
8957159	piece, plastic	48.6173726027048/8.25258591100223	DE	Sun Oct 04 2020	Oct	2020	Oct-2020	piece	plastic
8957036	paper	49.1255568974267/8.60184891164037	DE	Sun Oct 04 2020	Oct	2020	Oct-2020	paper
8957035	bottlecap, metal	49.1256847699912/8.60181624043506	DE	Sun Oct 04 2020	Oct	2020	Oct-2020	bottlecap	metal
8957008	plastic, wrapper	49.1255329001873/8.60150063265881	DE	Sun Oct 04 2020	Oct	2020	Oct-2020	plastic	wrapper
8956994	plastic, wrapper, lemonade	49.1253468325981/8.60203098760894	DE	Sun Oct 04 2020	Oct	2020	Oct-2020	plastic	wrapper	lemonade
8956992	plastic, lemonade, wrapper	49.1257380786889/8.60206758789227	DE	Sun Oct 04 2020	Oct	2020	Oct-2020	plastic	lemonade	wrapper
8956991	plastic, wrapper, lemonade	49.1257296149343/8.60206713488113	DE	Sun Oct 04 2020	Oct	2020	Oct-2020	plastic	wrapper	lemonade
8956990	tissue	49.1255821884782/8.60202457540856	DE	Sun Oct 04 2020	Oct	2020	Oct-2020	tissue
8956989	drinkcarton	49.1255351656426/8.60200013385277	DE	Sun Oct 04 2020	Oct	2020	Oct-2020	drinkcarton
8956985	plastic	49.1255500736291/8.601592182633	DE	Sun Oct 04 2020	Oct	2020	Oct-2020	plastic
8956984	pizza box	49.1257748784038/8.60160782707531	DE	Sun Oct 04 2020	Oct	2020	Oct-2020	pizza box
8956983	tissue	49.1257585840818/8.60155525068165	DE	Sun Oct 04 2020	Oct	2020	Oct-2020	tissue
8956982	plastic	49.1257556919666/8.60156222910928	DE	Sun Oct 04 2020	Oct	2020	Oct-2020	plastic
8956981	plastic, piece	49.1257585840818/8.60155525068165	DE	Sun Oct 04 2020	Oct	2020	Oct-2020	plastic	piece
8956980	bottlecap	49.1250509059774/8.6016819123965	DE	Sun Oct 04 2020	Oct	2020	Oct-2020	bottlecap
8956893	plastic	49.125471556368/8.60168019264214	DE	Sun Oct 04 2020	Oct	2020	Oct-2020	plastic
8956892	piece, plastic	49.1253923665623/8.60180073200897	DE	Sun Oct 04 2020	Oct	2020	Oct-2020	piece	plastic
8956891	plastic, wrapper	49.1256489416447/8.60176010419099	DE	Sun Oct 04 2020	Oct	2020	Oct-2020	plastic	wrapper
8956890	glassbottle	49.1250462857044/8.60225799562095	DE	Sun Oct 04 2020	Oct	2020	Oct-2020	glassbottle
8956889	bottle, glassbottle	49.1256238873942/8.60178508074137	DE	Sun Oct 04 2020	Oct	2020	Oct-2020	bottle	glassbottle
8956888	coffeecup	49.1255210588588/8.60164155120694	DE	Sun Oct 04 2020	Oct	2020	Oct-2020	coffeecup
8956887	tissues	49.1256505264059/8.60171838418443	DE	Sun Oct 04 2020	Oct	2020	Oct-2020	tissues
8956886	paper	49.1257414864425/8.60177481167109	DE	Sun Oct 04 2020	Oct	2020	Oct-2020	paper
8956884	plastic, wrapper, lemonade	49.1250558869911/8.60152710025844	DE	Sun Oct 04 2020	Oct	2020	Oct-2020	plastic	wrapper	lemonade
8956823	cigarettebox, paper, plastic	49.1256761328736/8.60161644626394	DE	Sun Oct 04 2020	Oct	2020	Oct-2020	cigarettebox	paper	plastic
8956822	can, metal, redbull	49.1257115842323/8.60158577403886	DE	Sun Oct 04 2020	Oct	2020	Oct-2020	can	metal	redbull
8956815	plastic, chipsbag	49.1253099704144/8.60175584622586	DE	Sun Oct 04 2020	Oct	2020	Oct-2020	plastic	chipsbag
8956814	paper	49.1252241386094/8.60165683177396	DE	Sun Oct 04 2020	Oct	2020	Oct-2020	paper
8956712	plastic, condom, billyboy	49.1251506241258/8.60273197826429	DE	Sun Oct 04 2020	Oct	2020	Oct-2020	plastic	condom	billyboy
8956349	plastic, piece	49.1245969340242/8.60321387136196	DE	Sun Oct 04 2020	Oct	2020	Oct-2020	plastic	piece
8956348	piece, plastic	49.1246131100418/8.60326052237635	DE	Sun Oct 04 2020	Oct	2020	Oct-2020	piece	plastic
8956242	plastic, wrapper	49.1245980077853/8.60321833297322	DE	Sun Oct 04 2020	Oct	2020	Oct-2020	plastic	wrapper
8956241	paper	49.124613792137/8.60324049841646	DE	Sun Oct 04 2020	Oct	2020	Oct-2020	paper
8956240	tissue	49.1245294772509/8.60315156948989	DE	Sun Oct 04 2020	Oct	2020	Oct-2020	tissue
8956236	candy, wrapper, plastic	49.1243812282691/8.60316234605587	DE	Sun Oct 04 2020	Oct	2020	Oct-2020	candy	wrapper	plastic
8956235	paper	49.1243077415222/8.60313516941468	DE	Sun Oct 04 2020	Oct	2020	Oct-2020	paper
8956119	facemask	49.1244792078834/8.60324379148022	DE	Sun Oct 04 2020	Oct	2020	Oct-2020	facemask
8956117	candy, wrapper, plastic	49.1241133728265/8.60316789130899	DE	Sun Oct 04 2020	Oct	2020	Oct-2020	candy	wrapper	plastic
8956068	paper	49.1239761673426/8.6029079142198	DE	Sun Oct 04 2020	Oct	2020	Oct-2020	paper
8956067	plastic, piece	49.1236173590004/8.60314728686259	DE	Sun Oct 04 2020	Oct	2020	Oct-2020	plastic	piece
8956038	lemonade, drinkpouch, caprisun, plastic, wrapper	49.1235585509842/8.60292570059575	DE	Sun Oct 04 2020	Oct	2020	Oct-2020	lemonade	drinkpouch	caprisun	plastic	wrapper
8956035	cup, icecream	49.1235004208856/8.60298221665739	DE	Sun Oct 04 2020	Oct	2020	Oct-2020	cup	icecream
8956034	caprisun, wrapper, plastic	49.1234150422003/8.60292591857193	DE	Sun Oct 04 2020	Oct	2020	Oct-2020	caprisun	wrapper	plastic
8956032	plastic	49.1235061698487/8.60273004818221	DE	Sun Oct 04 2020	Oct	2020	Oct-2020	plastic
8956031	aluminum	49.1235155094379/8.60261448309548	DE	Sun Oct 04 2020	Oct	2020	Oct-2020	aluminum
8955286	butt, cigarette	49.4234336/8.4206841	DE	Sun Oct 04 2020	Oct	2020	Oct-2020	butt	cigarette
8955284	crowncap, eichbaum	49.4234933/8.4203432	DE	Sun Oct 04 2020	Oct	2020	Oct-2020	crowncap	eichbaum
8955283	butt, cigarette	49.4234645/8.4203325	DE	Sun Oct 04 2020	Oct	2020	Oct-2020	butt	cigarette
8955282	butt, cigarette	49.4234246/8.4207658	DE	Sun Oct 04 2020	Oct	2020	Oct-2020	butt	cigarette
8955280	cigarette, cigarettebutt	49.4234456/8.4204341	DE	Sun Oct 04 2020	Oct	2020	Oct-2020	cigarette	cigarettebutt
8955279	plastic	49.4234771/8.4203969	DE	Sun Oct 04 2020	Oct	2020	Oct-2020	plastic
8955278	cigarette	49.4234225/8.4204622	DE	Sun Oct 04 2020	Oct	2020	Oct-2020	cigarette
8955277	butt, cigarette	49.4234273/8.420557	DE	Sun Oct 04 2020	Oct	2020	Oct-2020	butt	cigarette
8955276	butt, cigarette, marlboro	49.4234222/8.42078	DE	Sun Oct 04 2020	Oct	2020	Oct-2020	butt	cigarette	marlboro
8955275	butt, cigarette	49.4234352/8.4206204	DE	Sun Oct 04 2020	Oct	2020	Oct-2020	butt	cigarette
8955265	aluminum, chewinggum	49.4234305/8.4203921	DE	Sun Oct 04 2020	Oct	2020	Oct-2020	aluminum	chewinggum
8954350	paper	49.122682682795/8.60482088869002	DE	Sun Oct 04 2020	Oct	2020	Oct-2020	paper
8954263	candy, plastic, wrapper	49.1227369464724/8.6041115621341	DE	Sun Oct 04 2020	Oct	2020	Oct-2020	candy	plastic	wrapper
8954238	plastic, wrapper	49.1231834840867/8.60363543330187	DE	Sun Oct 04 2020	Oct	2020	Oct-2020	plastic	wrapper
8953322	paper	49.1232541366339/8.60347039549201	DE	Sun Oct 04 2020	Oct	2020	Oct-2020	paper
8953309	paper, newspaper	49.1231129985299/8.60329047679606	DE	Sun Oct 04 2020	Oct	2020	Oct-2020	paper	newspaper
8953305	bag, plastic	49.1231536672844/8.60293898055602	DE	Sun Oct 04 2020	Oct	2020	Oct-2020	bag	plastic
8952841	aluminum	49.1232800394877/8.6028241964548	DE	Sun Oct 04 2020	Oct	2020	Oct-2020	aluminum
8952840	aluminum	49.1232779255677/8.60282521193272	DE	Sun Oct 04 2020	Oct	2020	Oct-2020	aluminum
8952839	aluminum	49.1232611807925/8.60279740060491	DE	Sun Oct 04 2020	Oct	2020	Oct-2020	aluminum
8952838	paper	49.1232310841543/8.6027746441538	DE	Sun Oct 04 2020	Oct	2020	Oct-2020	paper
8952837	aluminum	49.1232574701387/8.60283292475575	DE	Sun Oct 04 2020	Oct	2020	Oct-2020	aluminum
8952836	aluminum	49.1232574701387/8.60283292475575	DE	Sun Oct 04 2020	Oct	2020	Oct-2020	aluminum
8952835	aluminum	49.1232289375057/8.60276720982627	DE	Sun Oct 04 2020	Oct	2020	Oct-2020	aluminum
8952813	aluminum	49.1232956519724/8.60265188421274	DE	Sun Oct 04 2020	Oct	2020	Oct-2020	aluminum
8952811	aluminum	49.123299876655/8.60263855868895	DE	Sun Oct 04 2020	Oct	2020	Oct-2020	aluminum
8952775	plastic	49.1233764479992/8.60243478245762	DE	Sun Oct 04 2020	Oct	2020	Oct-2020	plastic
8952768	facemask	49.1233961092483/8.60224002023039	DE	Sun Oct 04 2020	Oct	2020	Oct-2020	facemask
8952763	plastic, cup	49.123336031293/8.60217521726193	DE	Sun Oct 04 2020	Oct	2020	Oct-2020	plastic	cup
8952762	tissue	49.1233815008552/8.60208008835188	DE	Sun Oct 04 2020	Oct	2020	Oct-2020	tissue
8952743	cup, paper	49.1233432774277/8.60194989626624	DE	Sun Oct 04 2020	Oct	2020	Oct-2020	cup	paper
8952737	facemask	49.1231932477713/8.60185355753244	DE	Sun Oct 04 2020	Oct	2020	Oct-2020	facemask
8952736	paper, piece	49.1232687801137/8.60171719065115	DE	Sun Oct 04 2020	Oct	2020	Oct-2020	paper	piece
8952713	paper, piece	49.1232399893341/8.60164328890355	DE	Sun Oct 04 2020	Oct	2020	Oct-2020	paper	piece
8952712	paper, piece	49.1232615117192/8.60157262242042	DE	Sun Oct 04 2020	Oct	2020	Oct-2020	paper	piece
8952672	paper, piece	49.1232021506482/8.6015152757193	DE	Sun Oct 04 2020	Oct	2020	Oct-2020	paper	piece
8952655	glassbottle	49.1230974862276/8.6011427620909	DE	Sun Oct 04 2020	Oct	2020	Oct-2020	glassbottle
8952628	plastic, wrapper	49.1231706118416/8.6010979379231	DE	Sun Oct 04 2020	Oct	2020	Oct-2020	plastic	wrapper
8952627	paper, plastic	49.1230842358828/8.6006857809938	DE	Sun Oct 04 2020	Oct	2020	Oct-2020	paper	plastic
8952574	piece, paper	49.1233058646102/8.60084105767908	DE	Sun Oct 04 2020	Oct	2020	Oct-2020	piece	paper
8952555	plastic	49.1233701979008/8.6009582827591	DE	Sun Oct 04 2020	Oct	2020	Oct-2020	plastic
8952553	sock	49.1236114572737/8.60096438715023	DE	Sun Oct 04 2020	Oct	2020	Oct-2020	sock
8952146	paper	49.1239021585622/8.60099243141834	DE	Sun Oct 04 2020	Oct	2020	Oct-2020	paper
8952145	plastic, bag	49.124100305546/8.60119090535578	DE	Sun Oct 04 2020	Oct	2020	Oct-2020	plastic	bag
8952142	paper, piece	49.1238680456888/8.60103003260901	DE	Sun Oct 04 2020	Oct	2020	Oct-2020	paper	piece
8952128	facemask	49.1243390076847/8.60130663755776	DE	Sun Oct 04 2020	Oct	2020	Oct-2020	facemask
8951199	paper	49.1244008550813/8.60123552092466	DE	Sun Oct 04 2020	Oct	2020	Oct-2020	paper
8951192	plastic, piece	49.1245494221585/8.60124918631483	DE	Sun Oct 04 2020	Oct	2020	Oct-2020	plastic	piece
8951173	piece, plastic	49.1245325145598/8.60127365902789	DE	Sun Oct 04 2020	Oct	2020	Oct-2020	piece	plastic
8951080	plastic, wrapper, candy, haribo	49.1244379633055/8.60125026873666	DE	Sun Oct 04 2020	Oct	2020	Oct-2020	plastic	wrapper	candy	haribo
8951042	drinkcarton	49.1242137069558/8.60123554293758	DE	Sun Oct 04 2020	Oct	2020	Oct-2020	drinkcarton
8951039	milkcarton	49.1243337433982/8.60124718359489	DE	Sun Oct 04 2020	Oct	2020	Oct-2020	milkcarton
8951035	porcelain, cup	49.1243355154363/8.60126086918083	DE	Sun Oct 04 2020	Oct	2020	Oct-2020	porcelain	cup
8951034	drinkcarton	49.124446792236/8.60126711660629	DE	Sun Oct 04 2020	Oct	2020	Oct-2020	drinkcarton
8950972	drinkcarton	49.1244623018853/8.60128582588957	DE	Sun Oct 04 2020	Oct	2020	Oct-2020	drinkcarton
8950916	tissue	49.1245050972518/8.60117369825626	DE	Sun Oct 04 2020	Oct	2020	Oct-2020	tissue
8950915	plastic	49.1243970450536/8.60120769501773	DE	Sun Oct 04 2020	Oct	2020	Oct-2020	plastic
8950914	bottlecap	49.1242835051896/8.60037570303328	DE	Sun Oct 04 2020	Oct	2020	Oct-2020	bottlecap
8950913	tampon	49.1242921515676/8.60091518965987	DE	Sun Oct 04 2020	Oct	2020	Oct-2020	tampon
8950911	bottlecap	49.1243023750193/8.60031500444414	DE	Sun Oct 04 2020	Oct	2020	Oct-2020	bottlecap
8950906	candy, plastic, wrapper	49.1242493173917/8.60094978526445	DE	Sun Oct 04 2020	Oct	2020	Oct-2020	candy	plastic	wrapper
8950905	bottlecap	49.1243227385976/8.60042209761201	DE	Sun Oct 04 2020	Oct	2020	Oct-2020	bottlecap
8950904	plastic	49.124300363034/8.60094457212208	DE	Sun Oct 04 2020	Oct	2020	Oct-2020	plastic
8950903	paper, piece	49.1243621923991/8.60046691872079	DE	Sun Oct 04 2020	Oct	2020	Oct-2020	paper	piece
8950902	metal	49.124367784449/8.60044134493267	DE	Sun Oct 04 2020	Oct	2020	Oct-2020	metal
8950898	bottlecap	49.1243988718388/8.60044255837692	DE	Sun Oct 04 2020	Oct	2020	Oct-2020	bottlecap
8950897	metal	49.1243617651631/8.60042100733774	DE	Sun Oct 04 2020	Oct	2020	Oct-2020	metal
8950896	cigarette	49.124398494093/8.60041677130472	DE	Sun Oct 04 2020	Oct	2020	Oct-2020	cigarette
8950895	metal	49.1243861561227/8.60039900673516	DE	Sun Oct 04 2020	Oct	2020	Oct-2020	metal
8950894	bottlecap	49.1243708781569/8.60038307732304	DE	Sun Oct 04 2020	Oct	2020	Oct-2020	bottlecap
8950893	bottlecap	49.1242958587938/8.60037058694872	DE	Sun Oct 04 2020	Oct	2020	Oct-2020	bottlecap
8950892	bottlecap	49.1243177829156/8.60037175935779	DE	Sun Oct 04 2020	Oct	2020	Oct-2020	bottlecap
8950891	bottlecap	49.1243481484567/8.60036986790104	DE	Sun Oct 04 2020	Oct	2020	Oct-2020	bottlecap
8950890	bottlecap	49.1243559031836/8.60039825511902	DE	Sun Oct 04 2020	Oct	2020	Oct-2020	bottlecap
8950322	bottlecap	49.1246963228585/8.60044357535413	DE	Sun Oct 04 2020	Oct	2020	Oct-2020	bottlecap
8949755	plastic, bottlecap	49.1248552895886/8.60028121701301	DE	Sun Oct 04 2020	Oct	2020	Oct-2020	plastic	bottlecap
8949220	paper	49.1250173405754/8.59967659921813	DE	Sun Oct 04 2020	Oct	2020	Oct-2020	paper
8947094	cigarettebutt	49.8519274089328/7.86705287376556	DE	Sun Oct 04 2020	Oct	2020	Oct-2020	cigarettebutt
8947091	cigarettebutt	49.8519187576435/7.86696402109953	DE	Sun Oct 04 2020	Oct	2020	Oct-2020	cigarettebutt
8947090	cigarettebutt	49.8519506975971/7.86699669184579	DE	Sun Oct 04 2020	Oct	2020	Oct-2020	cigarettebutt
8947089	cigarettebutt	49.8519424884925/7.8670495985898	DE	Sun Oct 04 2020	Oct	2020	Oct-2020	cigarettebutt
8947088	cigarettebutt	49.8519382786846/7.86698311503475	DE	Sun Oct 04 2020	Oct	2020	Oct-2020	cigarettebutt
8947087	cigarettebutt	49.8519133073324/7.86696102781504	DE	Sun Oct 04 2020	Oct	2020	Oct-2020	cigarettebutt
8947083	plastic	49.8519370460655/7.86700074082066	DE	Sun Oct 04 2020	Oct	2020	Oct-2020	plastic
8944583	cigarettebutt	49.8518278290346/7.86724263276238	DE	Sun Oct 04 2020	Oct	2020	Oct-2020	cigarettebutt
8944582	plastic	49.85195186621/7.86704162575054	DE	Sun Oct 04 2020	Oct	2020	Oct-2020	plastic
8944581	plastic	49.8519502583506/7.86699514852391	DE	Sun Oct 04 2020	Oct	2020	Oct-2020	plastic
8944580	metal	49.8518783998672/7.86709665368737	DE	Sun Oct 04 2020	Oct	2020	Oct-2020	metal
8944579	cigarettebutt	49.8519591830941/7.8670124368359	DE	Sun Oct 04 2020	Oct	2020	Oct-2020	cigarettebutt
8942094	plasticcups	53.5443587644134/9.91492935475981	DE	Sun Oct 04 2020	Oct	2020	Oct-2020	plasticcups
8940626	clothing	49.6299668272268/8.62935663260661	DE	Sun Oct 04 2020	Oct	2020	Oct-2020	clothing
8939820	glass, shard	48.6185267335257/8.27484145761307	DE	Sun Oct 04 2020	Oct	2020	Oct-2020	glass	shard
8939819	aluminum, aluminumfoil	48.6192733934602/8.2749158050942	DE	Sun Oct 04 2020	Oct	2020	Oct-2020	aluminum	aluminumfoil
8939818	piece, plastic	48.6192271672642/8.27487657778736	DE	Sun Oct 04 2020	Oct	2020	Oct-2020	piece	plastic
8939817	piece, plastic	48.6192271672642/8.27487657778736	DE	Sun Oct 04 2020	Oct	2020	Oct-2020	piece	plastic
8939816	piece, ceramic, shard	48.6186887511099/8.27495239569029	DE	Sun Oct 04 2020	Oct	2020	Oct-2020	piece	ceramic	shard
8939815	glass, shard	48.6187229957884/8.27511353419002	DE	Sun Oct 04 2020	Oct	2020	Oct-2020	glass	shard
8939814	glass, shard	48.6187400948709/8.2750437129366	DE	Sun Oct 04 2020	Oct	2020	Oct-2020	glass	shard
8939813	glass, shard	48.6186191020986/8.27492871322508	DE	Sun Oct 04 2020	Oct	2020	Oct-2020	glass	shard
8939812	plastic, tar, concrete, ring, plasticreinforcedconcretering	48.6186931981227/8.27508185059603	DE	Sun Oct 04 2020	Oct	2020	Oct-2020	plastic	tar	concrete	ring	plasticreinforcedconcretering
8939811	plastic, strand, line, leftoverfromflooding, wire	48.6186074093437/8.27479166910823	DE	Sun Oct 04 2020	Oct	2020	Oct-2020	plastic	strand	line	leftoverfromflooding	wire
8939810	plastic, concreteandtarpouredobplastic, piece	48.6185239255881/8.27470307239171	DE	Sun Oct 04 2020	Oct	2020	Oct-2020	plastic	concreteandtarpouredobplastic	piece
8939806	plastic, manufacturedmay1985, 1985, piece	48.6187012129113/8.2753164034202	DE	Sun Oct 04 2020	Oct	2020	Oct-2020	plastic	manufacturedmay1985	1985	piece
8939805	plastic, piece	48.6184779375477/8.27524813592121	DE	Sun Oct 04 2020	Oct	2020	Oct-2020	plastic	piece
8939794	piece, plastic	48.6185569244417/8.27421793312416	DE	Sun Oct 04 2020	Oct	2020	Oct-2020	piece	plastic
8936747	cigarette	49.851951579429/7.86700542728848	DE	Sun Oct 04 2020	Oct	2020	Oct-2020	cigarette
8936746	aluminumfoil	49.8519538189378/7.8670080531685	DE	Sun Oct 04 2020	Oct	2020	Oct-2020	aluminumfoil
8936745	plastic, wrapper	49.8519666693605/7.86702388430475	DE	Sun Oct 04 2020	Oct	2020	Oct-2020	plastic	wrapper
8936744	cigarettebutt	49.8519646331226/7.86703015618464	DE	Sun Oct 04 2020	Oct	2020	Oct-2020	cigarettebutt
8936743	cigarettebutt	49.8519591830941/7.8670124368359	DE	Sun Oct 04 2020	Oct	2020	Oct-2020	cigarettebutt
8936742	cigarettebutt	49.8519361535555/7.86701784156715	DE	Sun Oct 04 2020	Oct	2020	Oct-2020	cigarettebutt
8936741	cigarettebutt	49.8519625787915/7.86702566097495	DE	Sun Oct 04 2020	Oct	2020	Oct-2020	cigarettebutt
8936740	cigarettebutt	49.8519361535555/7.86701784156715	DE	Sun Oct 04 2020	Oct	2020	Oct-2020	cigarettebutt
8936739	plastic	49.8519330356716/7.86701345061009	DE	Sun Oct 04 2020	Oct	2020	Oct-2020	plastic
8936738	cigarettebutt	49.8519260448114/7.86706551625425	DE	Sun Oct 04 2020	Oct	2020	Oct-2020	cigarettebutt
8936737	cigarettebutt	49.8519352824407/7.86701648761363	DE	Sun Oct 04 2020	Oct	2020	Oct-2020	cigarettebutt
8936736	paper	49.8519292673337/7.86702066972587	DE	Sun Oct 04 2020	Oct	2020	Oct-2020	paper
8936735	cigarettebutt	49.8519272829822/7.86702303339938	DE	Sun Oct 04 2020	Oct	2020	Oct-2020	cigarettebutt
8936734	cigarettebutt	49.8519281854117/7.86702182795396	DE	Sun Oct 04 2020	Oct	2020	Oct-2020	cigarettebutt
8936733	cigarettebutt	49.8519353602014/7.86697633481195	DE	Sun Oct 04 2020	Oct	2020	Oct-2020	cigarettebutt
8936732	cigarette	49.851925795934/7.8670564279057	DE	Sun Oct 04 2020	Oct	2020	Oct-2020	cigarette
8936731	metal	49.8519549071078/7.86699823746019	DE	Sun Oct 04 2020	Oct	2020	Oct-2020	metal
8936730	plastic	49.8519541335555/7.8670001089949	DE	Sun Oct 04 2020	Oct	2020	Oct-2020	plastic
8936726	cigarettebutt	49.851956093009/7.8669793765163	DE	Sun Oct 04 2020	Oct	2020	Oct-2020	cigarettebutt
8936725	cigarettebutt	49.8519608294067/7.86696757567995	DE	Sun Oct 04 2020	Oct	2020	Oct-2020	cigarettebutt
8936724	cigarettebutt	49.8519792311124/7.86702694188027	DE	Sun Oct 04 2020	Oct	2020	Oct-2020	cigarettebutt
8936723	cigarettebutt	49.8519792311124/7.86702694188027	DE	Sun Oct 04 2020	Oct	2020	Oct-2020	cigarettebutt
8936714	cigarettebutt	49.8519537886467/7.86699028084374	DE	Sun Oct 04 2020	Oct	2020	Oct-2020	cigarettebutt
8936712	plastic	49.8519525699752/7.86697739932224	DE	Sun Oct 04 2020	Oct	2020	Oct-2020	plastic
8936704	cigarettebutt	49.8519525699752/7.86697739932224	DE	Sun Oct 04 2020	Oct	2020	Oct-2020	cigarettebutt
8936697	cigarettebutt	49.8519537886467/7.86699028084374	DE	Sun Oct 04 2020	Oct	2020	Oct-2020	cigarettebutt
8936681	cigarettebutt	49.851959803621/7.86700091751881	DE	Sun Oct 04 2020	Oct	2020	Oct-2020	cigarettebutt
8936676	cigarettebutt	49.8519605116083/7.86698387916601	DE	Sun Oct 04 2020	Oct	2020	Oct-2020	cigarettebutt
8936673	paper	49.8519446368495/7.866979740104	DE	Sun Oct 04 2020	Oct	2020	Oct-2020	paper
8936672	cigarettebutt	49.8519472296661/7.86699791271157	DE	Sun Oct 04 2020	Oct	2020	Oct-2020	cigarettebutt
8936669	cigarettebutt	49.8519452958133/7.86697607578766	DE	Sun Oct 04 2020	Oct	2020	Oct-2020	cigarettebutt
8936662	cigarettebutt	49.8519476928615/7.866979513926	DE	Sun Oct 04 2020	Oct	2020	Oct-2020	cigarettebutt
8936657	cigarettebutt	49.8519525452316/7.86698919996944	DE	Sun Oct 04 2020	Oct	2020	Oct-2020	cigarettebutt
8936656	cigarettebutt	49.8519543527831/7.86700725778136	DE	Sun Oct 04 2020	Oct	2020	Oct-2020	cigarettebutt
8936634	cigarettebutt	49.8519537656234/7.86702639566354	DE	Sun Oct 04 2020	Oct	2020	Oct-2020	cigarettebutt
8936625	cigarettebutt	49.8519487056032/7.86701591105944	DE	Sun Oct 04 2020	Oct	2020	Oct-2020	cigarettebutt
8936624	wire	49.8519613423644/7.86703281122981	DE	Sun Oct 04 2020	Oct	2020	Oct-2020	wire
8936623	cigarettebutt	49.8519992700239/7.86702562731241	DE	Sun Oct 04 2020	Oct	2020	Oct-2020	cigarettebutt
8936601	cigarette	49.8519686730086/7.86703204080766	DE	Sun Oct 04 2020	Oct	2020	Oct-2020	cigarette
8936600	cigarettebutt	49.8519742623635/7.86700661301379	DE	Sun Oct 04 2020	Oct	2020	Oct-2020	cigarettebutt
8936599	cigarettebutt	49.851974192402/7.86698792005883	DE	Sun Oct 04 2020	Oct	2020	Oct-2020	cigarettebutt
8936597	cigarette	49.851974192402/7.86698792005883	DE	Sun Oct 04 2020	Oct	2020	Oct-2020	cigarette
8936594	cigarettebutt	49.8520237289231/7.86702063282566	DE	Sun Oct 04 2020	Oct	2020	Oct-2020	cigarettebutt
8936585	plastic	49.8520106559799/7.8670292126395	DE	Sun Oct 04 2020	Oct	2020	Oct-2020	plastic
8936577	cigarettebutt	49.8520681788903/7.8670188407481	DE	Sun Oct 04 2020	Oct	2020	Oct-2020	cigarettebutt
8936539	paper	49.8519904616232/7.86701667257524	DE	Sun Oct 04 2020	Oct	2020	Oct-2020	paper
8936519	cigarettebutt	49.8519442422727/7.86696154964974	DE	Sun Oct 04 2020	Oct	2020	Oct-2020	cigarettebutt
8936517	cigarettebutt	49.8519663216697/7.86705391899234	DE	Sun Oct 04 2020	Oct	2020	Oct-2020	cigarettebutt
8936515	cigarettebutt	49.8519364394776/7.86698608155461	DE	Sun Oct 04 2020	Oct	2020	Oct-2020	cigarettebutt
8936511	cigarettebutt	49.8519442422727/7.86696154964974	DE	Sun Oct 04 2020	Oct	2020	Oct-2020	cigarettebutt
8936494	ceramic	49.8519725381866/7.86694926951956	DE	Sun Oct 04 2020	Oct	2020	Oct-2020	ceramic
8936493	plastic	49.851935012561/7.86705806667345	DE	Sun Oct 04 2020	Oct	2020	Oct-2020	plastic
8936492	cigarettebutt	49.851964667579/7.86696283835238	DE	Sun Oct 04 2020	Oct	2020	Oct-2020	cigarettebutt
8936491	plastic	49.8519605426448/7.8670500945241	DE	Sun Oct 04 2020	Oct	2020	Oct-2020	plastic
8936490	cigarettebutt	49.8519466426586/7.86697520386624	DE	Sun Oct 04 2020	Oct	2020	Oct-2020	cigarettebutt
8936474	plastic	49.8519750729704/7.8669386459303	DE	Sun Oct 04 2020	Oct	2020	Oct-2020	plastic
8936473	cigarettebutt	49.8519775330699/7.86695712788778	DE	Sun Oct 04 2020	Oct	2020	Oct-2020	cigarettebutt
8936472	cigarettebutt	49.8519466426586/7.86697520386624	DE	Sun Oct 04 2020	Oct	2020	Oct-2020	cigarettebutt
8936471	cigarettebutt	49.8519775330699/7.86695712788778	DE	Sun Oct 04 2020	Oct	2020	Oct-2020	cigarettebutt
8936469	cigarettebutt	49.8519775330699/7.86695712788778	DE	Sun Oct 04 2020	Oct	2020	Oct-2020	cigarettebutt
8936468	cigarettebutt	49.8519775330699/7.86695712788778	DE	Sun Oct 04 2020	Oct	2020	Oct-2020	cigarettebutt
8936467	aluminumfoil	49.8519686559781/7.86693705555649	DE	Sun Oct 04 2020	Oct	2020	Oct-2020	aluminumfoil
8936463	cigarettebutt	49.8519679272961/7.86695714300428	DE	Sun Oct 04 2020	Oct	2020	Oct-2020	cigarettebutt
8936462	cigarettebutt	49.8519679272961/7.86695714300428	DE	Sun Oct 04 2020	Oct	2020	Oct-2020	cigarettebutt
8936460	cigarettebutt	49.8519716065821/7.86698266197774	DE	Sun Oct 04 2020	Oct	2020	Oct-2020	cigarettebutt
8936459	cigarettebutt	49.8519716065821/7.86698266197774	DE	Sun Oct 04 2020	Oct	2020	Oct-2020	cigarettebutt
8936458	cigarettebutt	49.8519714565969/7.86696477878553	DE	Sun Oct 04 2020	Oct	2020	Oct-2020	cigarettebutt
8936456	cigarettebutt	49.8519515652188/7.86697325179061	DE	Sun Oct 04 2020	Oct	2020	Oct-2020	cigarettebutt
8936453	cigarettebutt	49.8519732884542/7.86699003341009	DE	Sun Oct 04 2020	Oct	2020	Oct-2020	cigarettebutt
8936452	cigarettebutt	49.8519727125839/7.8670069449762	DE	Sun Oct 04 2020	Oct	2020	Oct-2020	cigarettebutt
8936451	cigarettebutt	49.8519628325345/7.86698206352758	DE	Sun Oct 04 2020	Oct	2020	Oct-2020	cigarettebutt
8936450	cigarettebutt	49.8519738251172/7.86698355135465	DE	Sun Oct 04 2020	Oct	2020	Oct-2020	cigarettebutt
8936449	cigarettebutt	49.8519767639503/7.86699876247098	DE	Sun Oct 04 2020	Oct	2020	Oct-2020	cigarettebutt
8936448	cigarettebutt	49.8519824580318/7.86700197785956	DE	Sun Oct 04 2020	Oct	2020	Oct-2020	cigarettebutt
8936447	cigarettebutt	49.8519693467195/7.86697836235029	DE	Sun Oct 04 2020	Oct	2020	Oct-2020	cigarettebutt
8936442	cigarettebutt	49.8519869913484/7.86697528874809	DE	Sun Oct 04 2020	Oct	2020	Oct-2020	cigarettebutt
8936441	cigarettebutt	49.8519664924243/7.86698335545163	DE	Sun Oct 04 2020	Oct	2020	Oct-2020	cigarettebutt
8936440	cigarettebutt	49.8519738251172/7.86698355135465	DE	Sun Oct 04 2020	Oct	2020	Oct-2020	cigarettebutt
8936439	cigarettebutt	49.8519766966475/7.86699598320536	DE	Sun Oct 04 2020	Oct	2020	Oct-2020	cigarettebutt
8936438	cigarettebutt	49.8520031322767/7.86700400038049	DE	Sun Oct 04 2020	Oct	2020	Oct-2020	cigarettebutt
8936437	cigarettebutt	49.8520263718982/7.86694893111529	DE	Sun Oct 04 2020	Oct	2020	Oct-2020	cigarettebutt
8936436	cigarettebutt	49.852047979462/7.8669219055798	DE	Sun Oct 04 2020	Oct	2020	Oct-2020	cigarettebutt
8936435	cigarettebutt	49.8519664924243/7.86698335545163	DE	Sun Oct 04 2020	Oct	2020	Oct-2020	cigarettebutt
8936434	cigarettebutt	49.8519664924243/7.86698335545163	DE	Sun Oct 04 2020	Oct	2020	Oct-2020	cigarettebutt
8936433	cigarettebutt	49.8519672052234/7.86698345508486	DE	Sun Oct 04 2020	Oct	2020	Oct-2020	cigarettebutt
8936432	cigarettebutt	49.85196710769/7.86696801829811	DE	Sun Oct 04 2020	Oct	2020	Oct-2020	cigarettebutt
8936428	cigarettebutt	49.8519645084532/7.86689305139165	DE	Sun Oct 04 2020	Oct	2020	Oct-2020	cigarettebutt
8936427	cigarettebutt	49.8519518944138/7.86696321879744	DE	Sun Oct 04 2020	Oct	2020	Oct-2020	cigarettebutt
8936425	cigarettebutt	49.8519551712552/7.86692393939945	DE	Sun Oct 04 2020	Oct	2020	Oct-2020	cigarettebutt
8936424	cigarettebutt	49.8519633603925/7.86692410871184	DE	Sun Oct 04 2020	Oct	2020	Oct-2020	cigarettebutt
8936417	cigarettebutt	49.8519559900847/7.86692482612337	DE	Sun Oct 04 2020	Oct	2020	Oct-2020	cigarettebutt
8936412	cigarettebutt	49.8519370080102/7.86688225769493	DE	Sun Oct 04 2020	Oct	2020	Oct-2020	cigarettebutt
8936395	cigarettebutt	49.8519790077615/7.86697730699777	DE	Sun Oct 04 2020	Oct	2020	Oct-2020	cigarettebutt
8936371	cigarettebutt	49.8519373537095/7.86696837376578	DE	Sun Oct 04 2020	Oct	2020	Oct-2020	cigarettebutt
8936357	cigarettebutt	49.8519630647166/7.86696698272431	DE	Sun Oct 04 2020	Oct	2020	Oct-2020	cigarettebutt
8936353	cigarettebutt	49.8519600013534/7.86698631147968	DE	Sun Oct 04 2020	Oct	2020	Oct-2020	cigarettebutt
8936351	cigarettebutt	49.851965852793/7.86699722587206	DE	Sun Oct 04 2020	Oct	2020	Oct-2020	cigarettebutt
8936347	cigarettebutt	49.8519630021115/7.86698143832759	DE	Sun Oct 04 2020	Oct	2020	Oct-2020	cigarettebutt
8936334	cigarettebutt	49.8519581248116/7.86697146813466	DE	Sun Oct 04 2020	Oct	2020	Oct-2020	cigarettebutt
8936328	cigarettebutt	49.8519519220025/7.86699299504955	DE	Sun Oct 04 2020	Oct	2020	Oct-2020	cigarettebutt
8936324	cigarettebutt	49.8519568427438/7.86697442645548	DE	Sun Oct 04 2020	Oct	2020	Oct-2020	cigarettebutt
8936319	cigarettebutt	49.851967497688/7.86698712465407	DE	Sun Oct 04 2020	Oct	2020	Oct-2020	cigarettebutt
8936309	cigarettebutt	49.8519747689339/7.8669930287743	DE	Sun Oct 04 2020	Oct	2020	Oct-2020	cigarettebutt
8936307	cigarettebutt	49.8519463534452/7.86696541757617	DE	Sun Oct 04 2020	Oct	2020	Oct-2020	cigarettebutt
8936304	cigarettebutt	49.8519536973986/7.86699002886696	DE	Sun Oct 04 2020	Oct	2020	Oct-2020	cigarettebutt
8936297	cigarettebutt	49.8520077378493/7.86714460636871	DE	Sun Oct 04 2020	Oct	2020	Oct-2020	cigarettebutt
8936281	cigarettebutt	49.8520077378493/7.86714460636871	DE	Sun Oct 04 2020	Oct	2020	Oct-2020	cigarettebutt
8936267	cigarettebutt	49.8520035473152/7.86724819858694	DE	Sun Oct 04 2020	Oct	2020	Oct-2020	cigarettebutt
8936200	cigarettebutt	49.8520216739398/7.8671198626158	DE	Sun Oct 04 2020	Oct	2020	Oct-2020	cigarettebutt
8936150	cigarettebutt	49.8520551865564/7.86717054044249	DE	Sun Oct 04 2020	Oct	2020	Oct-2020	cigarettebutt
8936143	cigarettebutt	49.8520463330338/7.86717928044721	DE	Sun Oct 04 2020	Oct	2020	Oct-2020	cigarettebutt
8936138	cigarettebutt	49.8520579991284/7.86718175789394	DE	Sun Oct 04 2020	Oct	2020	Oct-2020	cigarettebutt
8936136	cigarettebutt	49.852051960105/7.8671772815671	DE	Sun Oct 04 2020	Oct	2020	Oct-2020	cigarettebutt
8936117	cigarettebutt	49.8520975458196/7.8674196823228	DE	Sun Oct 04 2020	Oct	2020	Oct-2020	cigarettebutt
8936116	cigarettebutt	49.8520075543276/7.86720762968286	DE	Sun Oct 04 2020	Oct	2020	Oct-2020	cigarettebutt
8936110	cigarettebutt	49.8520154797669/7.86719738448504	DE	Sun Oct 04 2020	Oct	2020	Oct-2020	cigarettebutt
8936030	cigarettebutt	49.8519884409401/7.86725974456259	DE	Sun Oct 04 2020	Oct	2020	Oct-2020	cigarettebutt
8935972	cigarettebutt	49.85206569362/7.86715284679935	DE	Sun Oct 04 2020	Oct	2020	Oct-2020	cigarettebutt
8935952	cigarettebutt	49.852017233472/7.86717742401424	DE	Sun Oct 04 2020	Oct	2020	Oct-2020	cigarettebutt
8935948	cigarettebutt	49.8519887568443/7.8671590473578	DE	Sun Oct 04 2020	Oct	2020	Oct-2020	cigarettebutt
8935918	cigarettebutt	49.8519401147747/7.86715636834879	DE	Sun Oct 04 2020	Oct	2020	Oct-2020	cigarettebutt
8935913	cigarettebutt	49.852003760055/7.86718073611723	DE	Sun Oct 04 2020	Oct	2020	Oct-2020	cigarettebutt
8935912	cigarettebutt	49.8519855552548/7.86711316188714	DE	Sun Oct 04 2020	Oct	2020	Oct-2020	cigarettebutt
8935904	cigarettebutt	49.8519961680894/7.86716656056399	DE	Sun Oct 04 2020	Oct	2020	Oct-2020	cigarettebutt
8935902	cigarettebutt	49.8519340523773/7.8671043111441	DE	Sun Oct 04 2020	Oct	2020	Oct-2020	cigarettebutt
8935900	cigarettebutt	49.8519012113878/7.86709020394407	DE	Sun Oct 04 2020	Oct	2020	Oct-2020	cigarettebutt
8935899	cigarettebutt	49.8519220963253/7.86709241744525	DE	Sun Oct 04 2020	Oct	2020	Oct-2020	cigarettebutt
8935898	cigarettebutt	49.8519222572201/7.86714831493554	DE	Sun Oct 04 2020	Oct	2020	Oct-2020	cigarettebutt
8935897	cigarettebutt	49.8519271383704/7.86709294788643	DE	Sun Oct 04 2020	Oct	2020	Oct-2020	cigarettebutt
8935895	cigarettebutt	49.8519226755209/7.86709276995806	DE	Sun Oct 04 2020	Oct	2020	Oct-2020	cigarettebutt
8935894	cigarettebutt	49.8519284043122/7.86707044316296	DE	Sun Oct 04 2020	Oct	2020	Oct-2020	cigarettebutt
8935893	cigarettebutt	49.8519257243232/7.86708966626139	DE	Sun Oct 04 2020	Oct	2020	Oct-2020	cigarettebutt
8935892	cigarettebutt	49.8519156178269/7.86703501713158	DE	Sun Oct 04 2020	Oct	2020	Oct-2020	cigarettebutt
8935891	cigarettebutt	49.8519468368972/7.8669836872737	DE	Sun Oct 04 2020	Oct	2020	Oct-2020	cigarettebutt
8935890	cigarettebutt	49.8519355618888/7.86708848391317	DE	Sun Oct 04 2020	Oct	2020	Oct-2020	cigarettebutt
8935889	cigarettebutt	49.8519381760467/7.86708512797283	DE	Sun Oct 04 2020	Oct	2020	Oct-2020	cigarettebutt
8935888	cigarettebutt	49.8519286912793/7.86707688449023	DE	Sun Oct 04 2020	Oct	2020	Oct-2020	cigarettebutt
8935887	cigarettebutt	49.8519214857248/7.86709469955839	DE	Sun Oct 04 2020	Oct	2020	Oct-2020	cigarettebutt
8935886	cigarettebutt	49.8519137270716/7.86716664399515	DE	Sun Oct 04 2020	Oct	2020	Oct-2020	cigarettebutt
8935885	cigarettebutt	49.8519097389639/7.86713409231863	DE	Sun Oct 04 2020	Oct	2020	Oct-2020	cigarettebutt
8935884	cigarettebutt	49.8519311743676/7.86714492598215	DE	Sun Oct 04 2020	Oct	2020	Oct-2020	cigarettebutt
8935882	cigarettebutt	49.8519020569323/7.86714588572804	DE	Sun Oct 04 2020	Oct	2020	Oct-2020	cigarettebutt
8935881	cigarettebutt	49.8519311743676/7.86714492598215	DE	Sun Oct 04 2020	Oct	2020	Oct-2020	cigarettebutt
8935880	cigarettebutt	49.8519020569323/7.86714588572804	DE	Sun Oct 04 2020	Oct	2020	Oct-2020	cigarettebutt
8935879	cigarettebutt	49.8519276598328/7.86712621571679	DE	Sun Oct 04 2020	Oct	2020	Oct-2020	cigarettebutt
8935877	cigarettebutt	49.8519059533835/7.86728969644704	DE	Sun Oct 04 2020	Oct	2020	Oct-2020	cigarettebutt
8935876	cigarettebutt	49.8518907490741/7.86726401314231	DE	Sun Oct 04 2020	Oct	2020	Oct-2020	cigarettebutt
8935875	cigarettebutt	49.8519242707155/7.86729541890131	DE	Sun Oct 04 2020	Oct	2020	Oct-2020	cigarettebutt
8935871	cigarettebutt	49.8519095915494/7.86730054597611	DE	Sun Oct 04 2020	Oct	2020	Oct-2020	cigarettebutt
8935870	cigarettebutt	49.8518986611023/7.86729156213331	DE	Sun Oct 04 2020	Oct	2020	Oct-2020	cigarettebutt
8935869	cigarettebutt	49.8519095915494/7.86730054597611	DE	Sun Oct 04 2020	Oct	2020	Oct-2020	cigarettebutt
8935868	cigarettebutt	49.8519193674126/7.86729652773682	DE	Sun Oct 04 2020	Oct	2020	Oct-2020	cigarettebutt
8935867	cigarettebutt	49.8519251031124/7.86729166300978	DE	Sun Oct 04 2020	Oct	2020	Oct-2020	cigarettebutt
8935864	cigarettebutt	49.8518410893505/7.8673005834004	DE	Sun Oct 04 2020	Oct	2020	Oct-2020	cigarettebutt
8935863	cigarettebutt	49.8518321578907/7.8672899137536	DE	Sun Oct 04 2020	Oct	2020	Oct-2020	cigarettebutt
8935862	cigarettebutt	49.8519135273181/7.86720274457814	DE	Sun Oct 04 2020	Oct	2020	Oct-2020	cigarettebutt
8935861	cigarettebutt	49.8519135273181/7.86720274457814	DE	Sun Oct 04 2020	Oct	2020	Oct-2020	cigarettebutt
8935860	cigarettebutt	49.8518928792297/7.86721156368115	DE	Sun Oct 04 2020	Oct	2020	Oct-2020	cigarettebutt
8935844	cigarettebutt	49.8518431662232/7.86717614782652	DE	Sun Oct 04 2020	Oct	2020	Oct-2020	cigarettebutt
8935843	cigarettebutt	49.8518775000372/7.86716988125576	DE	Sun Oct 04 2020	Oct	2020	Oct-2020	cigarettebutt
8935841	cigarettebutt	49.8519295831846/7.86721058244247	DE	Sun Oct 04 2020	Oct	2020	Oct-2020	cigarettebutt
8935839	cigarettebutt	49.8518976484071/7.86720418411842	DE	Sun Oct 04 2020	Oct	2020	Oct-2020	cigarettebutt
8935838	cigarettebutt	49.8518976484071/7.86720418411842	DE	Sun Oct 04 2020	Oct	2020	Oct-2020	cigarettebutt
8935836	cigarettebutt	49.8518936858311/7.86721305189746	DE	Sun Oct 04 2020	Oct	2020	Oct-2020	cigarettebutt
8935832	cigarettebutt	49.8518817845909/7.86722848519328	DE	Sun Oct 04 2020	Oct	2020	Oct-2020	cigarettebutt
8935831	cigarettebutt	49.8518798494389/7.86721607478535	DE	Sun Oct 04 2020	Oct	2020	Oct-2020	cigarettebutt
8935829	cigarettebutt	49.851836881218/7.8672500081552	DE	Sun Oct 04 2020	Oct	2020	Oct-2020	cigarettebutt
8935827	cigarettebutt	49.851898223502/7.8672607591085	DE	Sun Oct 04 2020	Oct	2020	Oct-2020	cigarettebutt
8935826	cigarettebutt	49.8518835340054/7.86720202743663	DE	Sun Oct 04 2020	Oct	2020	Oct-2020	cigarettebutt
8935823	cigarettebutt	49.8518653335899/7.86720085897696	DE	Sun Oct 04 2020	Oct	2020	Oct-2020	cigarettebutt
8935821	cigarettebutt	49.851866149399/7.86721285149649	DE	Sun Oct 04 2020	Oct	2020	Oct-2020	cigarettebutt
8935820	cigarettebutt	49.8518789047334/7.86722204643203	DE	Sun Oct 04 2020	Oct	2020	Oct-2020	cigarettebutt
8935818	cigarettebutt	49.8518749649167/7.8672128708245	DE	Sun Oct 04 2020	Oct	2020	Oct-2020	cigarettebutt
8935815	cigarettebutt	49.8518861545927/7.86739331690498	DE	Sun Oct 04 2020	Oct	2020	Oct-2020	cigarettebutt
8935811	cigarettebutt	49.8518564857669/7.86726043286092	DE	Sun Oct 04 2020	Oct	2020	Oct-2020	cigarettebutt
8935808	cigarettebutt	49.8518837980204/7.86722709189462	DE	Sun Oct 04 2020	Oct	2020	Oct-2020	cigarettebutt
8935807	cigarettebutt	49.8518837980204/7.86722709189462	DE	Sun Oct 04 2020	Oct	2020	Oct-2020	cigarettebutt
8935802	cigarettebutt	49.8519058046985/7.86720885829071	DE	Sun Oct 04 2020	Oct	2020	Oct-2020	cigarettebutt
8935801	cigarettebutt	49.8519058046985/7.86720885829071	DE	Sun Oct 04 2020	Oct	2020	Oct-2020	cigarettebutt
8935799	cigarettebutt	49.8518984550656/7.86723255600804	DE	Sun Oct 04 2020	Oct	2020	Oct-2020	cigarettebutt
8935798	cigarettebutt	49.851842842827/7.86730163520022	DE	Sun Oct 04 2020	Oct	2020	Oct-2020	cigarettebutt
8935797	cigarettebutt	49.851842842827/7.86730163520022	DE	Sun Oct 04 2020	Oct	2020	Oct-2020	cigarettebutt
8935796	cigarettebutt	49.851842842827/7.86730163520022	DE	Sun Oct 04 2020	Oct	2020	Oct-2020	cigarettebutt
8935795	cigarettebutt	49.8518804530763/7.86727480783156	DE	Sun Oct 04 2020	Oct	2020	Oct-2020	cigarettebutt
8935790	cigarettebutt	49.8518804530763/7.86727480783156	DE	Sun Oct 04 2020	Oct	2020	Oct-2020	cigarettebutt
8935789	cigarettebutt	49.8518804530763/7.86727480783156	DE	Sun Oct 04 2020	Oct	2020	Oct-2020	cigarettebutt
8935787	cigarettebutt	49.851872845885/7.86732065298905	DE	Sun Oct 04 2020	Oct	2020	Oct-2020	cigarettebutt
8935786	cigarettebutt	49.851872845885/7.86732065298905	DE	Sun Oct 04 2020	Oct	2020	Oct-2020	cigarettebutt
8935750	cigarettebutt	49.8518469512711/7.86720082244729	DE	Sun Oct 04 2020	Oct	2020	Oct-2020	cigarettebutt
8935741	cigarettebutt	49.8518709022076/7.86726745832375	DE	Sun Oct 04 2020	Oct	2020	Oct-2020	cigarettebutt
8935737	cigarettebutt	49.8518698861488/7.8672666712285	DE	Sun Oct 04 2020	Oct	2020	Oct-2020	cigarettebutt
8935733	cigarettebutt	49.8518258712266/7.86711021262168	DE	Sun Oct 04 2020	Oct	2020	Oct-2020	cigarettebutt
8935732	cigarettebutt	49.851861671139/7.86724372194528	DE	Sun Oct 04 2020	Oct	2020	Oct-2020	cigarettebutt
8935730	cigarettebutt	49.8518494062487/7.8672318427561	DE	Sun Oct 04 2020	Oct	2020	Oct-2020	cigarettebutt
8935727	cigarettebutt	49.8518640788799/7.86708118136169	DE	Sun Oct 04 2020	Oct	2020	Oct-2020	cigarettebutt
8935722	cigarettebutt	49.8518955446594/7.86723068528094	DE	Sun Oct 04 2020	Oct	2020	Oct-2020	cigarettebutt
8935720	cigarettebutt	49.8518955446594/7.86723068528094	DE	Sun Oct 04 2020	Oct	2020	Oct-2020	cigarettebutt
8935719	cigarettebutt	49.8518955446594/7.86723068528094	DE	Sun Oct 04 2020	Oct	2020	Oct-2020	cigarettebutt
8935717	cigarettebutt	49.8518817085197/7.86726200730934	DE	Sun Oct 04 2020	Oct	2020	Oct-2020	cigarettebutt
8935716	cigarettebutt	49.851888831927/7.86726584329588	DE	Sun Oct 04 2020	Oct	2020	Oct-2020	cigarettebutt
8935714	cigarettebutt	49.8518897181436/7.86725039623772	DE	Sun Oct 04 2020	Oct	2020	Oct-2020	cigarettebutt
8935713	cigarettebutt	49.8518924472684/7.86725722896815	DE	Sun Oct 04 2020	Oct	2020	Oct-2020	cigarettebutt
8935712	cigarettebutt	49.8518776218026/7.86727214879867	DE	Sun Oct 04 2020	Oct	2020	Oct-2020	cigarettebutt
8935711	cigarettebutt	49.8519034400314/7.86723790050357	DE	Sun Oct 04 2020	Oct	2020	Oct-2020	cigarettebutt
8935710	cigarettebutt	49.8518736548655/7.86727501936331	DE	Sun Oct 04 2020	Oct	2020	Oct-2020	cigarettebutt
8935709	metal	49.8519001263269/7.8672468105656	DE	Sun Oct 04 2020	Oct	2020	Oct-2020	metal
8935708	cigarettebutt	49.8519001263269/7.8672468105656	DE	Sun Oct 04 2020	Oct	2020	Oct-2020	cigarettebutt
8935706	cigarettebutt	49.8518640832481/7.86720438558632	DE	Sun Oct 04 2020	Oct	2020	Oct-2020	cigarettebutt
8935705	cigarettebutt	49.8518850085944/7.86733614772749	DE	Sun Oct 04 2020	Oct	2020	Oct-2020	cigarettebutt
8935704	wood	49.8519139130918/7.86721945215246	DE	Sun Oct 04 2020	Oct	2020	Oct-2020	wood
8935703	cigarettebutt	49.8519139130918/7.86721945215246	DE	Sun Oct 04 2020	Oct	2020	Oct-2020	cigarettebutt
8935701	cigarettebutt	49.8518979267118/7.86734216517582	DE	Sun Oct 04 2020	Oct	2020	Oct-2020	cigarettebutt
8935700	cigarettebutt	49.8518979267118/7.86734216517582	DE	Sun Oct 04 2020	Oct	2020	Oct-2020	cigarettebutt
8935699	cigarettebutt	49.8518979267118/7.86734216517582	DE	Sun Oct 04 2020	Oct	2020	Oct-2020	cigarettebutt
8935697	metal, screw	49.8518949130443/7.86729216885765	DE	Sun Oct 04 2020	Oct	2020	Oct-2020	metal	screw
8935696	cigarettebutt	49.8518837444573/7.86719447597374	DE	Sun Oct 04 2020	Oct	2020	Oct-2020	cigarettebutt
8935695	cigarettebutt	49.8519240903543/7.86725036893567	DE	Sun Oct 04 2020	Oct	2020	Oct-2020	cigarettebutt
8935692	cigarettebutt	49.8518761267201/7.86713035163232	DE	Sun Oct 04 2020	Oct	2020	Oct-2020	cigarettebutt
8935691	cigarettebutt	49.8519059134511/7.86725638247442	DE	Sun Oct 04 2020	Oct	2020	Oct-2020	cigarettebutt
8935690	cigarettebutt	49.8519324046329/7.86727125064141	DE	Sun Oct 04 2020	Oct	2020	Oct-2020	cigarettebutt
8935689	cigarettebutt	49.8519108700447/7.86725557055368	DE	Sun Oct 04 2020	Oct	2020	Oct-2020	cigarettebutt
8935687	plastic	49.8519396571038/7.86752129205086	DE	Sun Oct 04 2020	Oct	2020	Oct-2020	plastic
8935686	cigarettebutt	49.8519138038161/7.8671974799676	DE	Sun Oct 04 2020	Oct	2020	Oct-2020	cigarettebutt
8935685	cigarettebutt	49.8519275393118/7.8672857880248	DE	Sun Oct 04 2020	Oct	2020	Oct-2020	cigarettebutt
8935684	aluminum	49.8519198533259/7.86731973525314	DE	Sun Oct 04 2020	Oct	2020	Oct-2020	aluminum
8935683	plastic	49.8519146923366/7.86715792851072	DE	Sun Oct 04 2020	Oct	2020	Oct-2020	plastic
8935682	cigarettebutt	49.8519490165875/7.86719056473541	DE	Sun Oct 04 2020	Oct	2020	Oct-2020	cigarettebutt
8935681	cigarettebutt	49.8519146923366/7.86715792851072	DE	Sun Oct 04 2020	Oct	2020	Oct-2020	cigarettebutt
8935680	plastic	49.8519473088401/7.86730804610361	DE	Sun Oct 04 2020	Oct	2020	Oct-2020	plastic
8935678	plastic	49.8519473088401/7.86730804610361	DE	Sun Oct 04 2020	Oct	2020	Oct-2020	plastic
8935676	cigarette	49.851919290087/7.86730265089657	DE	Sun Oct 04 2020	Oct	2020	Oct-2020	cigarette
8935674	cigarettebutt	49.8519996149543/7.86724102662159	DE	Sun Oct 04 2020	Oct	2020	Oct-2020	cigarettebutt
8935673	cigarettebutt	49.8519706396067/7.86728930001895	DE	Sun Oct 04 2020	Oct	2020	Oct-2020	cigarettebutt
8935672	cigarettebutt	49.851919290087/7.86730265089657	DE	Sun Oct 04 2020	Oct	2020	Oct-2020	cigarettebutt
8935668	cigarettebutt	49.8519523566346/7.86723977902638	DE	Sun Oct 04 2020	Oct	2020	Oct-2020	cigarettebutt
8935667	cigarettebutt	49.8519288138197/7.86727543917407	DE	Sun Oct 04 2020	Oct	2020	Oct-2020	cigarettebutt
8935665	cigarettebutt	49.8519860658866/7.86706042438873	DE	Sun Oct 04 2020	Oct	2020	Oct-2020	cigarettebutt
8935664	plastic	49.8519899223518/7.86728651221952	DE	Sun Oct 04 2020	Oct	2020	Oct-2020	plastic
8935658	plastic	49.8519566433999/7.86728058643687	DE	Sun Oct 04 2020	Oct	2020	Oct-2020	plastic
8935657	plastic	49.8519503016734/7.86729453662737	DE	Sun Oct 04 2020	Oct	2020	Oct-2020	plastic
8935653	cigarettebutt	49.8519353109701/7.86733757439014	DE	Sun Oct 04 2020	Oct	2020	Oct-2020	cigarettebutt
8935651	cigarette	49.8518864781634/7.86722251399083	DE	Sun Oct 04 2020	Oct	2020	Oct-2020	cigarette
8935650	plastic	49.8519245044564/7.86732295223649	DE	Sun Oct 04 2020	Oct	2020	Oct-2020	plastic
8935645	cigarettebutt	49.8519878081735/7.86725489864776	DE	Sun Oct 04 2020	Oct	2020	Oct-2020	cigarettebutt
8935644	cigarettebutt	49.8518864781634/7.86722251399083	DE	Sun Oct 04 2020	Oct	2020	Oct-2020	cigarettebutt
8935643	cigarettebutt	49.8519663587447/7.86730543752902	DE	Sun Oct 04 2020	Oct	2020	Oct-2020	cigarettebutt
8935640	wrapper, plastic	49.8519483424493/7.86723481602579	DE	Sun Oct 04 2020	Oct	2020	Oct-2020	wrapper	plastic
8935635	cigarettepack	49.8519741749901/7.86731279275962	DE	Sun Oct 04 2020	Oct	2020	Oct-2020	cigarettepack
8935631	cloth	49.851996723472/7.86726365628301	DE	Sun Oct 04 2020	Oct	2020	Oct-2020	cloth
8935630	cigarettebutt	49.851936336871/7.86748675389193	DE	Sun Oct 04 2020	Oct	2020	Oct-2020	cigarettebutt
8935627	cigarettebutt	49.851936336871/7.86748675389193	DE	Sun Oct 04 2020	Oct	2020	Oct-2020	cigarettebutt
8935625	plastic	49.8520429878267/7.8672818988482	DE	Sun Oct 04 2020	Oct	2020	Oct-2020	plastic
8935620	cigarettebutt	49.8520643068142/7.86725498656083	DE	Sun Oct 04 2020	Oct	2020	Oct-2020	cigarettebutt
8935616	wrapper, plastic	49.8520643068142/7.86725498656083	DE	Sun Oct 04 2020	Oct	2020	Oct-2020	wrapper	plastic
8935615	plastic	49.852012167017/7.86728785278918	DE	Sun Oct 04 2020	Oct	2020	Oct-2020	plastic
8935614	paper	49.8520251131135/7.86724737341333	DE	Sun Oct 04 2020	Oct	2020	Oct-2020	paper
8935610	plastic	49.8520751907493/7.86731809141262	DE	Sun Oct 04 2020	Oct	2020	Oct-2020	plastic
8935608	plastic	49.8520235723181/7.86730390550677	DE	Sun Oct 04 2020	Oct	2020	Oct-2020	plastic
8935607	paper	49.8520486901285/7.86730315316511	DE	Sun Oct 04 2020	Oct	2020	Oct-2020	paper
8935602	plastic	49.8520221958214/7.86729675948049	DE	Sun Oct 04 2020	Oct	2020	Oct-2020	plastic
8935599	plastic	49.8520116112548/7.86727875045581	DE	Sun Oct 04 2020	Oct	2020	Oct-2020	plastic
8935598	cigarettebutt	49.8520161197856/7.86729361433783	DE	Sun Oct 04 2020	Oct	2020	Oct-2020	cigarettebutt
8935596	plastic	49.8520115859523/7.86728178861184	DE	Sun Oct 04 2020	Oct	2020	Oct-2020	plastic
8935593	paper	49.8520206822217/7.86730893046374	DE	Sun Oct 04 2020	Oct	2020	Oct-2020	paper
8935588	paper	49.8520176258166/7.86733502841484	DE	Sun Oct 04 2020	Oct	2020	Oct-2020	paper
8935586	plastic	49.852006460081/7.86731956786341	DE	Sun Oct 04 2020	Oct	2020	Oct-2020	plastic
8935583	plastic	49.8519994874952/7.86725049037568	DE	Sun Oct 04 2020	Oct	2020	Oct-2020	plastic
8935580	wrapper	49.8519947779028/7.86730570403144	DE	Sun Oct 04 2020	Oct	2020	Oct-2020	wrapper
8935578	paper	49.8519991289963/7.86726702985003	DE	Sun Oct 04 2020	Oct	2020	Oct-2020	paper
8935573	paper	49.8520001494436/7.86729548159489	DE	Sun Oct 04 2020	Oct	2020	Oct-2020	paper
8935572	styrofoam	49.8520098560681/7.86730177402279	DE	Sun Oct 04 2020	Oct	2020	Oct-2020	styrofoam
8935569	plastic	49.852001959951/7.86726434317166	DE	Sun Oct 04 2020	Oct	2020	Oct-2020	plastic
8935556	cigarettebutt	49.8519959898336/7.86730450887751	DE	Sun Oct 04 2020	Oct	2020	Oct-2020	cigarettebutt
8935552	plastic	49.8519873577348/7.86739906158732	DE	Sun Oct 04 2020	Oct	2020	Oct-2020	plastic
8935547	paper	49.8519971825079/7.86731023299003	DE	Sun Oct 04 2020	Oct	2020	Oct-2020	paper
8935540	cigarettebutt	49.8520010710371/7.86725349133618	DE	Sun Oct 04 2020	Oct	2020	Oct-2020	cigarettebutt
8935526	cigarettebutt	49.8520078226031/7.86731893434612	DE	Sun Oct 04 2020	Oct	2020	Oct-2020	cigarettebutt
8935525	paper	49.8519937395141/7.86734738509154	DE	Sun Oct 04 2020	Oct	2020	Oct-2020	paper
8935524	cigarettebutt	49.8519803872775/7.86740166069639	DE	Sun Oct 04 2020	Oct	2020	Oct-2020	cigarettebutt
8935513	plastic	49.8519835040979/7.86739918637471	DE	Sun Oct 04 2020	Oct	2020	Oct-2020	plastic
8935507	metal	49.8520011962384/7.86732669038127	DE	Sun Oct 04 2020	Oct	2020	Oct-2020	metal
8935502	plastic	49.8520922216909/7.86744651946158	DE	Sun Oct 04 2020	Oct	2020	Oct-2020	plastic
8935493	cigarettebutt	49.8520342844807/7.86739968199962	DE	Sun Oct 04 2020	Oct	2020	Oct-2020	cigarettebutt
8935492	plastic	49.8520338400419/7.86735036523849	DE	Sun Oct 04 2020	Oct	2020	Oct-2020	plastic
8935490	plastic	49.8520125542158/7.86734054340508	DE	Sun Oct 04 2020	Oct	2020	Oct-2020	plastic
8935477	plastic	49.8519720779675/7.86738558861048	DE	Sun Oct 04 2020	Oct	2020	Oct-2020	plastic
8935471	cigarettebutt	49.8520652881891/7.86739348863851	DE	Sun Oct 04 2020	Oct	2020	Oct-2020	cigarettebutt
8935470	cigarettebutt	49.8520683670009/7.86742307850377	DE	Sun Oct 04 2020	Oct	2020	Oct-2020	cigarettebutt
8935459	paper	49.8521016750149/7.86740707098726	DE	Sun Oct 04 2020	Oct	2020	Oct-2020	paper
8935458	cigarettebutt	49.8521016750149/7.86740707098726	DE	Sun Oct 04 2020	Oct	2020	Oct-2020	cigarettebutt
8935454	plastic	49.8520828263682/7.86737256596864	DE	Sun Oct 04 2020	Oct	2020	Oct-2020	plastic
8935448	paper	49.8521375755994/7.8673281307289	DE	Sun Oct 04 2020	Oct	2020	Oct-2020	paper
8935444	plastic	49.8521567814049/7.86733161614986	DE	Sun Oct 04 2020	Oct	2020	Oct-2020	plastic
8935440	caprisun, drinkpouch	49.8521602837391/7.86736356841975	DE	Sun Oct 04 2020	Oct	2020	Oct-2020	caprisun	drinkpouch
8935330	cigarettebutt	49.8520397485172/7.86750430718242	DE	Sun Oct 04 2020	Oct	2020	Oct-2020	cigarettebutt
8935327	cigarettebutt	49.8520923870462/7.86754438931146	DE	Sun Oct 04 2020	Oct	2020	Oct-2020	cigarettebutt
8935324	cigarettebutt	49.8520531160616/7.86750665417303	DE	Sun Oct 04 2020	Oct	2020	Oct-2020	cigarettebutt
8935319	cigarettebutt	49.8520356884722/7.86748214156423	DE	Sun Oct 04 2020	Oct	2020	Oct-2020	cigarettebutt
8935318	cigarettebutt	49.8520116896213/7.86752941820855	DE	Sun Oct 04 2020	Oct	2020	Oct-2020	cigarettebutt
8935314	cigarettebutt	49.8520531065772/7.86739293962588	DE	Sun Oct 04 2020	Oct	2020	Oct-2020	cigarettebutt
8935282	cigarettebutt	49.8521320889809/7.86745703070046	DE	Sun Oct 04 2020	Oct	2020	Oct-2020	cigarettebutt
8935279	cigarettebutt	49.8521247363657/7.86745799262516	DE	Sun Oct 04 2020	Oct	2020	Oct-2020	cigarettebutt
8935271	cigarettebutt	49.8521382332619/7.86741839899366	DE	Sun Oct 04 2020	Oct	2020	Oct-2020	cigarettebutt
8935250	cigarettebutt	49.8692803922988/7.98120236815464	DE	Sat Oct 03 2020	Oct	2020	Oct-2020	cigarettebutt
8935203	cigarettebutt	49.866607251214/7.97945862645331	DE	Sat Oct 03 2020	Oct	2020	Oct-2020	cigarettebutt
8935200	cigarettebutt	49.8658902164025/7.98076576257341	DE	Sat Oct 03 2020	Oct	2020	Oct-2020	cigarettebutt
8935199	cigarettebutt	49.8659796679193/7.98043131454692	DE	Sat Oct 03 2020	Oct	2020	Oct-2020	cigarettebutt
8935189	cigarettebutt	49.8654672933211/7.98157375094761	DE	Sat Oct 03 2020	Oct	2020	Oct-2020	cigarettebutt
8935188	cigarettebutt	49.8628987845737/7.98921627157048	DE	Sat Oct 03 2020	Oct	2020	Oct-2020	cigarettebutt
8935185	cigarettebutt	49.8652518602944/7.98814586487074	DE	Sat Oct 03 2020	Oct	2020	Oct-2020	cigarettebutt
8935183	cigarettebutt	49.8654531297874/7.98322634849652	DE	Sat Oct 03 2020	Oct	2020	Oct-2020	cigarettebutt
8935180	cigarettebutt	49.8656624215202/7.98807575882548	DE	Sat Oct 03 2020	Oct	2020	Oct-2020	cigarettebutt
8935175	cigarettebutt	49.8651720214006/7.98716276663521	DE	Sat Oct 03 2020	Oct	2020	Oct-2020	cigarettebutt
8935174	cigarettebutt	49.8651904543191/7.98709544602471	DE	Sat Oct 03 2020	Oct	2020	Oct-2020	cigarettebutt
8935173	cigarettebutt	49.8651756427016/7.98712450011049	DE	Sat Oct 03 2020	Oct	2020	Oct-2020	cigarettebutt
8935171	cigarettebutt	49.8652368658029/7.98717587280748	DE	Sat Oct 03 2020	Oct	2020	Oct-2020	cigarettebutt
8935170	cigarettebutt	49.8654396422846/7.98635580468707	DE	Sat Oct 03 2020	Oct	2020	Oct-2020	cigarettebutt
8935169	cigarettebutt	49.8654044880573/7.98734612893703	DE	Sat Oct 03 2020	Oct	2020	Oct-2020	cigarettebutt
8935167	cigarettebutt	49.8652368658029/7.98717587280748	DE	Sat Oct 03 2020	Oct	2020	Oct-2020	cigarettebutt
8933710	cigarettepack	49.4165010280578/11.036875690786	DE	Sun Oct 04 2020	Oct	2020	Oct-2020	cigarettepack
8933689	facemask	49.4165679744906/11.03866524407	DE	Sun Oct 04 2020	Oct	2020	Oct-2020	facemask
8933688	mcdonalds	49.4157519375357/11.0373947904112	DE	Sun Oct 04 2020	Oct	2020	Oct-2020	mcdonalds
8933687	mcdonalds	49.4165972012519/11.0373709647143	DE	Sun Oct 04 2020	Oct	2020	Oct-2020	mcdonalds
8933676	plastic, bag	49.4165783321824/11.0377877879404	DE	Sun Oct 04 2020	Oct	2020	Oct-2020	plastic	bag
8933671	cigarettepack	49.4165784545409/11.0372544309686	DE	Sun Oct 04 2020	Oct	2020	Oct-2020	cigarettepack
8933670	fork	49.4154337166114/11.0371313895198	DE	Sun Oct 04 2020	Oct	2020	Oct-2020	fork
8933669	plastic, wrapper	49.4154337166114/11.0371313895198	DE	Sun Oct 04 2020	Oct	2020	Oct-2020	plastic	wrapper
8933656	plastic, bag	49.4154337166114/11.0371313895198	DE	Sun Oct 04 2020	Oct	2020	Oct-2020	plastic	bag
8933651	paper	49.4155887060045/11.0371745524331	DE	Sun Oct 04 2020	Oct	2020	Oct-2020	paper
8933650	cigarettepack	49.4166405143392/11.0370829729605	DE	Sun Oct 04 2020	Oct	2020	Oct-2020	cigarettepack
8933644	bottlecap	49.4158076115526/11.0373839808991	DE	Sun Oct 04 2020	Oct	2020	Oct-2020	bottlecap
8933635	drinkcarton	49.4165639517248/11.0374032020598	DE	Sun Oct 04 2020	Oct	2020	Oct-2020	drinkcarton
8933630	plastic	49.4156525994332/11.0372473142066	DE	Sun Oct 04 2020	Oct	2020	Oct-2020	plastic
8933628	paper	49.4163410502595/11.0374369794923	DE	Sun Oct 04 2020	Oct	2020	Oct-2020	paper
8933619	mcdonalds	49.4166525535846/11.0405889147937	DE	Sun Oct 04 2020	Oct	2020	Oct-2020	mcdonalds
8933613	mcdonalds	49.4161376387305/11.0375574985002	DE	Sun Oct 04 2020	Oct	2020	Oct-2020	mcdonalds
8932681	plasticbag	53.5448630314501/9.91287040312632	DE	Sun Oct 04 2020	Oct	2020	Oct-2020	plasticbag
8932545	plastic, bottle	49.2787852/8.0888592	DE	Sun Oct 04 2020	Oct	2020	Oct-2020	plastic	bottle
8932544	bottlecap, aluminum	49.27911/8.0903132	DE	Sun Oct 04 2020	Oct	2020	Oct-2020	bottlecap	aluminum
8932543	plastic	49.3894542/8.2620436	DE	Sun Oct 04 2020	Oct	2020	Oct-2020	plastic
8932542	plastic, candywrapper, pickup	49.2759295/8.0851667	DE	Sun Oct 04 2020	Oct	2020	Oct-2020	plastic	candywrapper	pickup
8932541	plastic	49.280474/8.1157104	DE	Sun Oct 04 2020	Oct	2020	Oct-2020	plastic
8932540	plastic	49.280474/8.1157104	DE	Sun Oct 04 2020	Oct	2020	Oct-2020	plastic
8932539	plastic	49.2787222/8.0886365	DE	Sun Oct 04 2020	Oct	2020	Oct-2020	plastic
8932538	plastic, wrapper	49.2787737/8.088798	DE	Sun Oct 04 2020	Oct	2020	Oct-2020	plastic	wrapper
8932537	plastic, lighter	49.2761006/8.0851499	DE	Sun Oct 04 2020	Oct	2020	Oct-2020	plastic	lighter
8932527	plastic	53.5448630314501/9.91287040312632	DE	Sun Oct 04 2020	Oct	2020	Oct-2020	plastic
8930003	plasticfoil	53.5452391393981/9.8841795232239	DE	Sun Oct 04 2020	Oct	2020	Oct-2020	plasticfoil
8929975	chipsbag	53.5451626126222/9.88403367810872	DE	Sun Oct 04 2020	Oct	2020	Oct-2020	chipsbag
8929973	cigarettebox	49.4165184730645/11.0371435424452	DE	Sun Oct 04 2020	Oct	2020	Oct-2020	cigarettebox
8929971	cigarettepack	49.4181463733076/11.0311401648466	DE	Sun Oct 04 2020	Oct	2020	Oct-2020	cigarettepack
8929970	facemask	53.5447187070302/9.88515140489664	DE	Sun Oct 04 2020	Oct	2020	Oct-2020	facemask
8929910	cigarette	49.6638947670707/8.44266670649194	DE	Sun Oct 04 2020	Oct	2020	Oct-2020	cigarette
8929885	cigarette	49.6636182672553/8.44279692119095	DE	Sun Oct 04 2020	Oct	2020	Oct-2020	cigarette
8929861	plastic, packaging	50.7062418904799/7.29064330786293	DE	Sun Oct 04 2020	Oct	2020	Oct-2020	plastic	packaging
8929832	plastic, packaging	50.7062253679807/7.29063993214675	DE	Sun Oct 04 2020	Oct	2020	Oct-2020	plastic	packaging
8929806	plastic, packaging, sweet	50.7053288012643/7.28854888086789	DE	Sun Oct 04 2020	Oct	2020	Oct-2020	plastic	packaging	sweet
8929736	plastic	49.6625714303256/8.44241228702714	DE	Sun Oct 04 2020	Oct	2020	Oct-2020	plastic
8929722	bottle, coke	49.6625557341478/8.44220583205394	DE	Sun Oct 04 2020	Oct	2020	Oct-2020	bottle	coke
8927446	plasticfoil	53.5447843792416/9.88728778437701	DE	Sun Oct 04 2020	Oct	2020	Oct-2020	plasticfoil
8927343	plasticfoil	53.5447843792416/9.88728778437701	DE	Sun Oct 04 2020	Oct	2020	Oct-2020	plasticfoil
8927293	sneaker	53.5446664877735/9.88703297452059	DE	Sun Oct 04 2020	Oct	2020	Oct-2020	sneaker
8927262	plasticfoil	53.5448341677464/9.88854004071084	DE	Sun Oct 04 2020	Oct	2020	Oct-2020	plasticfoil
8927186	plasticfoil	53.5446654819451/9.88890297711816	DE	Sun Oct 04 2020	Oct	2020	Oct-2020	plasticfoil
8927140	candybarwrapper	53.5447186131538/9.88927264558872	DE	Sun Oct 04 2020	Oct	2020	Oct-2020	candybarwrapper
8927106	joghurt container	53.5446375702075/9.88945341669944	DE	Sun Oct 04 2020	Oct	2020	Oct-2020	joghurt container
8927095	pappbecher	53.5447845221801/9.89235747856483	DE	Sun Oct 04 2020	Oct	2020	Oct-2020	pappbecher
8926004	metal	53.5441927426062/9.89693929442195	DE	Sun Oct 04 2020	Oct	2020	Oct-2020	metal
8925836	plastic, piece	54.6181594/13.3744319	DE	Sun Oct 04 2020	Oct	2020	Oct-2020	plastic	piece
8925835	cigarette, butt, cigarettebutt	54.5733321/13.4347615	DE	Sun Oct 04 2020	Oct	2020	Oct-2020	cigarette	butt	cigarettebutt
8925834	plastic, lollipopstick	54.6241621/13.3776755	DE	Sun Oct 04 2020	Oct	2020	Oct-2020	plastic	lollipopstick
8925833	stick, icecream, holz, eisstiel	54.5733321/13.4347615	DE	Sun Oct 04 2020	Oct	2020	Oct-2020	stick	icecream	holz	eisstiel
8925832	cigarette, butt, cigarettebutt	54.5733321/13.4347615	DE	Sun Oct 04 2020	Oct	2020	Oct-2020	cigarette	butt	cigarettebutt
8925831	luftballon, part of a baloon	54.6228268/13.3782283	DE	Sun Oct 04 2020	Oct	2020	Oct-2020	luftballon	part of a baloon
8925830	beerbottlecap, metal, beer	54.6196258/13.3793223	DE	Sun Oct 04 2020	Oct	2020	Oct-2020	beerbottlecap	metal	beer
8925829	cigarette, butt, cigarettebutt	54.6196373/13.3793255	DE	Sun Oct 04 2020	Oct	2020	Oct-2020	cigarette	butt	cigarettebutt
8925828	plastic, wrapper	54.6218299/13.3769001	DE	Sun Oct 04 2020	Oct	2020	Oct-2020	plastic	wrapper
8925758	plastikspielueug, schaumstoff	53.5442417767398/9.89977606573133	DE	Sun Oct 04 2020	Oct	2020	Oct-2020	plastikspielueug	schaumstoff
8920732	paper	49.6622252787744/8.44324115057879	DE	Sun Oct 04 2020	Oct	2020	Oct-2020	paper
8920731	plastic	49.6621631818318/8.44315515430487	DE	Sun Oct 04 2020	Oct	2020	Oct-2020	plastic
8920711	cigarette	49.6624195419862/8.44406261355288	DE	Sun Oct 04 2020	Oct	2020	Oct-2020	cigarette
8920709	cigarette	49.6626663650809/8.44402070430858	DE	Sun Oct 04 2020	Oct	2020	Oct-2020	cigarette
8920708	cigarette	49.6626754467913/8.44425442033874	DE	Sun Oct 04 2020	Oct	2020	Oct-2020	cigarette
8920707	cigarette	49.6625345738418/8.44412092289631	DE	Sun Oct 04 2020	Oct	2020	Oct-2020	cigarette
8920698	paper	49.6627955774223/8.44392728611355	DE	Sun Oct 04 2020	Oct	2020	Oct-2020	paper
8920691	paper	49.6629966873519/8.44396218405848	DE	Sun Oct 04 2020	Oct	2020	Oct-2020	paper
8920683	paper	49.6630340655965/8.44393924051341	DE	Sun Oct 04 2020	Oct	2020	Oct-2020	paper
8920523	pants	49.6637538456646/8.44411489129912	DE	Sun Oct 04 2020	Oct	2020	Oct-2020	pants
8920413	tschibo, can	49.663924005555/8.44417284398264	DE	Sun Oct 04 2020	Oct	2020	Oct-2020	tschibo	can
8920381	can, metal	49.6640687767692/8.44421061810038	DE	Sun Oct 04 2020	Oct	2020	Oct-2020	can	metal
8920334	cigarettebutt	50.5662348/7.2788306	DE	Sun Oct 04 2020	Oct	2020	Oct-2020	cigarettebutt
8920330	cigarettebutt	50.5661527/7.2788834	DE	Sun Oct 04 2020	Oct	2020	Oct-2020	cigarettebutt
8920329	cigarettebutt	50.5663215/7.2787765	DE	Sun Oct 04 2020	Oct	2020	Oct-2020	cigarettebutt
8920328	cigarettebutt	50.5662961/7.2787691	DE	Sun Oct 04 2020	Oct	2020	Oct-2020	cigarettebutt
8920327	cigarettebutt	50.5663325/7.2787377	DE	Sun Oct 04 2020	Oct	2020	Oct-2020	cigarettebutt
8920326	cigarettebutt	50.5663972/7.2786363	DE	Sun Oct 04 2020	Oct	2020	Oct-2020	cigarettebutt
8920325	cigarettebutt	50.5663338/7.2787335	DE	Sun Oct 04 2020	Oct	2020	Oct-2020	cigarettebutt
8920324	cigarettebutt	50.5664004/7.2784409	DE	Sun Oct 04 2020	Oct	2020	Oct-2020	cigarettebutt
8920323	cigarettebutt	50.5663997/7.2784613	DE	Sun Oct 04 2020	Oct	2020	Oct-2020	cigarettebutt
8920322	cigarettebutt	50.5671179/7.2780957	DE	Sun Oct 04 2020	Oct	2020	Oct-2020	cigarettebutt
8920321	cigarettebutt	50.5664761/7.2783224	DE	Sun Oct 04 2020	Oct	2020	Oct-2020	cigarettebutt
8920320	cigarettebutt	50.5664093/7.2784211	DE	Sun Oct 04 2020	Oct	2020	Oct-2020	cigarettebutt
8920317	cigarettebutt	50.5665039/7.2782763	DE	Sun Oct 04 2020	Oct	2020	Oct-2020	cigarettebutt
8920316	cigarettebutt	50.567014/7.2781021	DE	Sun Oct 04 2020	Oct	2020	Oct-2020	cigarettebutt
8920315	cigarettebutt	50.5664853/7.2782869	DE	Sun Oct 04 2020	Oct	2020	Oct-2020	cigarettebutt
8920314	cigarettebutt	50.5673903/7.277847	DE	Sun Oct 04 2020	Oct	2020	Oct-2020	cigarettebutt
8920313	cigarettebutt	50.5675415/7.2773327	DE	Sun Oct 04 2020	Oct	2020	Oct-2020	cigarettebutt
8920312	cigarettebutt	50.5674822/7.2777211	DE	Sun Oct 04 2020	Oct	2020	Oct-2020	cigarettebutt
8920311	cigarettebutt	50.5675098/7.2773891	DE	Sun Oct 04 2020	Oct	2020	Oct-2020	cigarettebutt
8920310	cigarettebutt	50.5675237/7.2773562	DE	Sun Oct 04 2020	Oct	2020	Oct-2020	cigarettebutt
8920309	cigarettebutt	50.5675488/7.2773206	DE	Sun Oct 04 2020	Oct	2020	Oct-2020	cigarettebutt
8920308	cigarettebutt	50.5675379/7.277339	DE	Sun Oct 04 2020	Oct	2020	Oct-2020	cigarettebutt
8920307	cigarettebutt	50.567602/7.2773414	DE	Sun Oct 04 2020	Oct	2020	Oct-2020	cigarettebutt
8920306	cigarettebutt	50.5676065/7.277352	DE	Sun Oct 04 2020	Oct	2020	Oct-2020	cigarettebutt
8920305	cigarettebutt	50.5674725/7.2776389	DE	Sun Oct 04 2020	Oct	2020	Oct-2020	cigarettebutt
8920303	cigarettebutt	50.5675098/7.2773891	DE	Sun Oct 04 2020	Oct	2020	Oct-2020	cigarettebutt
8920301	cigarettebutt	50.5675389/7.2773587	DE	Sun Oct 04 2020	Oct	2020	Oct-2020	cigarettebutt
8920300	cigarettebutt	50.5675389/7.2773587	DE	Sun Oct 04 2020	Oct	2020	Oct-2020	cigarettebutt
8920299	cigarettebutt	50.5675696/7.277389	DE	Sun Oct 04 2020	Oct	2020	Oct-2020	cigarettebutt
8920297	cigarettebutt	50.5676247/7.2772303	DE	Sun Oct 04 2020	Oct	2020	Oct-2020	cigarettebutt
8920296	bottle	50.5676301/7.2772421	DE	Sun Oct 04 2020	Oct	2020	Oct-2020	bottle
8920295	cigarettebutt	50.5676239/7.2772393	DE	Sun Oct 04 2020	Oct	2020	Oct-2020	cigarettebutt
8920294	cigarettebutt	50.567612/7.2772636	DE	Sun Oct 04 2020	Oct	2020	Oct-2020	cigarettebutt
8920293	cigarettebutt	50.5676231/7.2772454	DE	Sun Oct 04 2020	Oct	2020	Oct-2020	cigarettebutt
8920291	cigarettebutt	50.5677225/7.2772437	DE	Sun Oct 04 2020	Oct	2020	Oct-2020	cigarettebutt
8920290	cigarettebutt	50.5677674/7.2771809	DE	Sun Oct 04 2020	Oct	2020	Oct-2020	cigarettebutt
8920289	cigarettebutt	50.5677062/7.2773047	DE	Sun Oct 04 2020	Oct	2020	Oct-2020	cigarettebutt
8920288	cigarettebutt	50.5676423/7.2772452	DE	Sun Oct 04 2020	Oct	2020	Oct-2020	cigarettebutt
8920287	cigarettebutt	50.5676934/7.2772889	DE	Sun Oct 04 2020	Oct	2020	Oct-2020	cigarettebutt
8920286	cigarettebutt	50.5677082/7.2773001	DE	Sun Oct 04 2020	Oct	2020	Oct-2020	cigarettebutt
8920285	cigarettebutt	50.5677626/7.2771803	DE	Sun Oct 04 2020	Oct	2020	Oct-2020	cigarettebutt
8920284	cigarettebutt	50.5677082/7.2773001	DE	Sun Oct 04 2020	Oct	2020	Oct-2020	cigarettebutt
8920283	cigarettebutt	50.5677694/7.2771757	DE	Sun Oct 04 2020	Oct	2020	Oct-2020	cigarettebutt
8920282	cigarettebutt	50.567771/7.2771644	DE	Sun Oct 04 2020	Oct	2020	Oct-2020	cigarettebutt
8920281	cigarettebutt	50.5677813/7.2771542	DE	Sun Oct 04 2020	Oct	2020	Oct-2020	cigarettebutt
8920280	cigarettebutt	50.5677946/7.2771493	DE	Sun Oct 04 2020	Oct	2020	Oct-2020	cigarettebutt
8920279	cigarettebutt	50.5677849/7.2771536	DE	Sun Oct 04 2020	Oct	2020	Oct-2020	cigarettebutt
8920278	cigarettebutt	50.5678287/7.2771574	DE	Sun Oct 04 2020	Oct	2020	Oct-2020	cigarettebutt
8920277	cigarettebutt	50.5678111/7.277154	DE	Sun Oct 04 2020	Oct	2020	Oct-2020	cigarettebutt
8920276	cigarettebutt	50.5677708/7.2771703	DE	Sun Oct 04 2020	Oct	2020	Oct-2020	cigarettebutt
8920275	cigarettebutt	50.5677944/7.277152	DE	Sun Oct 04 2020	Oct	2020	Oct-2020	cigarettebutt
8920274	cigarettebutt	50.5677849/7.2771536	DE	Sun Oct 04 2020	Oct	2020	Oct-2020	cigarettebutt
8920273	cigarettebutt	50.5678152/7.277156	DE	Sun Oct 04 2020	Oct	2020	Oct-2020	cigarettebutt
8920272	cigarettebutt	50.5678287/7.2771574	DE	Sun Oct 04 2020	Oct	2020	Oct-2020	cigarettebutt
8920271	cigarettebutt	50.5678411/7.2771452	DE	Sun Oct 04 2020	Oct	2020	Oct-2020	cigarettebutt
8920270	cigarettebutt	50.5677951/7.2771537	DE	Sun Oct 04 2020	Oct	2020	Oct-2020	cigarettebutt
8920269	cigarettebutt	50.5678674/7.2771331	DE	Sun Oct 04 2020	Oct	2020	Oct-2020	cigarettebutt
8920268	cigarettebutt	50.5678513/7.277138	DE	Sun Oct 04 2020	Oct	2020	Oct-2020	cigarettebutt
8920267	cigarettebutt	50.5678831/7.2771082	DE	Sun Oct 04 2020	Oct	2020	Oct-2020	cigarettebutt
8920266	cigarettebutt	50.5679073/7.2770242	DE	Sun Oct 04 2020	Oct	2020	Oct-2020	cigarettebutt
8920265	cigarettebutt	50.5678681/7.2771511	DE	Sun Oct 04 2020	Oct	2020	Oct-2020	cigarettebutt
8920264	cigarettebutt	50.5678854/7.2771101	DE	Sun Oct 04 2020	Oct	2020	Oct-2020	cigarettebutt
8920263	cigarettebutt	50.5678675/7.277141	DE	Sun Oct 04 2020	Oct	2020	Oct-2020	cigarettebutt
8920262	cigarettebutt	50.5678813/7.277112	DE	Sun Oct 04 2020	Oct	2020	Oct-2020	cigarettebutt
8920261	cigarettebutt	50.5678663/7.2771472	DE	Sun Oct 04 2020	Oct	2020	Oct-2020	cigarettebutt
8920260	cigarettebutt	50.5678852/7.2771097	DE	Sun Oct 04 2020	Oct	2020	Oct-2020	cigarettebutt
8920259	cigarettebutt	50.5678975/7.2770888	DE	Sun Oct 04 2020	Oct	2020	Oct-2020	cigarettebutt
8920258	cigarettebutt	50.5678865/7.27711	DE	Sun Oct 04 2020	Oct	2020	Oct-2020	cigarettebutt
8920257	cigarettebutt	50.5678974/7.2770695	DE	Sun Oct 04 2020	Oct	2020	Oct-2020	cigarettebutt
8920256	cigarettebutt	50.5678911/7.2771051	DE	Sun Oct 04 2020	Oct	2020	Oct-2020	cigarettebutt
8920255	cigarettebutt	50.5678877/7.2771092	DE	Sun Oct 04 2020	Oct	2020	Oct-2020	cigarettebutt
8920254	cigarettebutt	50.5679128/7.27701	DE	Sun Oct 04 2020	Oct	2020	Oct-2020	cigarettebutt
8920253	cigarettebutt	50.5679071/7.2770434	DE	Sun Oct 04 2020	Oct	2020	Oct-2020	cigarettebutt
8920252	cigarettebutt	50.5679067/7.2769981	DE	Sun Oct 04 2020	Oct	2020	Oct-2020	cigarettebutt
8920251	cigarettebutt	50.5679213/7.2770391	DE	Sun Oct 04 2020	Oct	2020	Oct-2020	cigarettebutt
8920250	cigarettebutt	50.5679005/7.2770334	DE	Sun Oct 04 2020	Oct	2020	Oct-2020	cigarettebutt
8920249	cigarettebutt	50.5679237/7.2770408	DE	Sun Oct 04 2020	Oct	2020	Oct-2020	cigarettebutt
8920248	cigarettebutt	50.5679454/7.2770233	DE	Sun Oct 04 2020	Oct	2020	Oct-2020	cigarettebutt
8920245	cigarettebutt	50.5679342/7.2770343	DE	Sun Oct 04 2020	Oct	2020	Oct-2020	cigarettebutt
8920244	cigarettebutt	50.5679481/7.2770129	DE	Sun Oct 04 2020	Oct	2020	Oct-2020	cigarettebutt
8920243	cigarettebutt	50.5679472/7.2770084	DE	Sun Oct 04 2020	Oct	2020	Oct-2020	cigarettebutt
8920242	cigarettebutt	50.567953/7.2770465	DE	Sun Oct 04 2020	Oct	2020	Oct-2020	cigarettebutt
8920241	cigarettebutt	50.567927/7.2770355	DE	Sun Oct 04 2020	Oct	2020	Oct-2020	cigarettebutt
8920239	cigarettebutt	50.5679469/7.2770102	DE	Sun Oct 04 2020	Oct	2020	Oct-2020	cigarettebutt
8920238	cigarettebutt	50.5679589/7.277023	DE	Sun Oct 04 2020	Oct	2020	Oct-2020	cigarettebutt
8920237	cigarettebutt	50.5679596/7.277032	DE	Sun Oct 04 2020	Oct	2020	Oct-2020	cigarettebutt
8920236	cigarettebutt	50.5679593/7.2770174	DE	Sun Oct 04 2020	Oct	2020	Oct-2020	cigarettebutt
8920235	cigarettebutt	50.5679541/7.2770074	DE	Sun Oct 04 2020	Oct	2020	Oct-2020	cigarettebutt
8920233	cigarettebutt	50.5678556/7.2771221	DE	Sun Oct 04 2020	Oct	2020	Oct-2020	cigarettebutt
8920232	cigarettebutt	50.5678607/7.2771134	DE	Sun Oct 04 2020	Oct	2020	Oct-2020	cigarettebutt
8920231	cigarettebutt	50.5679292/7.2770771	DE	Sun Oct 04 2020	Oct	2020	Oct-2020	cigarettebutt
8920230	cigarettebutt	50.5678575/7.2771205	DE	Sun Oct 04 2020	Oct	2020	Oct-2020	cigarettebutt
8920228	cigarettebutt	50.567937/7.2770439	DE	Sun Oct 04 2020	Oct	2020	Oct-2020	cigarettebutt
8920227	cigarettebutt	50.5678693/7.2770974	DE	Sun Oct 04 2020	Oct	2020	Oct-2020	cigarettebutt
8920225	cigarettebutt	50.5678966/7.2770992	DE	Sun Oct 04 2020	Oct	2020	Oct-2020	cigarettebutt
8920224	cigarettebutt	50.5679105/7.2770882	DE	Sun Oct 04 2020	Oct	2020	Oct-2020	cigarettebutt
8920223	cigarettebutt	50.5679381/7.2770571	DE	Sun Oct 04 2020	Oct	2020	Oct-2020	cigarettebutt
8920220	cigarettebutt	50.5678596/7.2771155	DE	Sun Oct 04 2020	Oct	2020	Oct-2020	cigarettebutt
8920219	cigarettebutt	50.5678643/7.2771026	DE	Sun Oct 04 2020	Oct	2020	Oct-2020	cigarettebutt
8920218	cigarettebutt	50.5678739/7.2770976	DE	Sun Oct 04 2020	Oct	2020	Oct-2020	cigarettebutt
8920217	cigarettebutt	50.5679248/7.2770814	DE	Sun Oct 04 2020	Oct	2020	Oct-2020	cigarettebutt
8920215	cigarettebutt	50.5678378/7.2771319	DE	Sun Oct 04 2020	Oct	2020	Oct-2020	cigarettebutt
8920214	cigarettebutt	50.5678479/7.277128	DE	Sun Oct 04 2020	Oct	2020	Oct-2020	cigarettebutt
8920213	cigarettebutt	50.5678397/7.2771337	DE	Sun Oct 04 2020	Oct	2020	Oct-2020	cigarettebutt
8920212	cigarettebutt	50.5678528/7.2771271	DE	Sun Oct 04 2020	Oct	2020	Oct-2020	cigarettebutt
8920211	cigarettebutt	50.5678556/7.2771221	DE	Sun Oct 04 2020	Oct	2020	Oct-2020	cigarettebutt
8920209	cigarettebutt	50.5678371/7.2771307	DE	Sun Oct 04 2020	Oct	2020	Oct-2020	cigarettebutt
8920208	cigarettebutt	50.5678324/7.2771316	DE	Sun Oct 04 2020	Oct	2020	Oct-2020	cigarettebutt
8920207	cigarettebutt	50.5678191/7.2771401	DE	Sun Oct 04 2020	Oct	2020	Oct-2020	cigarettebutt
8920206	cigarettebutt	50.5678355/7.2771307	DE	Sun Oct 04 2020	Oct	2020	Oct-2020	cigarettebutt
8920205	cigarettebutt	50.5678189/7.2771424	DE	Sun Oct 04 2020	Oct	2020	Oct-2020	cigarettebutt
8920203	cigarettebutt	50.5678188/7.2771469	DE	Sun Oct 04 2020	Oct	2020	Oct-2020	cigarettebutt
8920202	cigarettebutt	50.5678192/7.2771437	DE	Sun Oct 04 2020	Oct	2020	Oct-2020	cigarettebutt
8920201	cigarettebutt	50.567817/7.2771494	DE	Sun Oct 04 2020	Oct	2020	Oct-2020	cigarettebutt
8920200	cigarettebutt	50.5678144/7.2771474	DE	Sun Oct 04 2020	Oct	2020	Oct-2020	cigarettebutt
8920199	cigarettebutt	50.567824/7.2771363	DE	Sun Oct 04 2020	Oct	2020	Oct-2020	cigarettebutt
8920197	cigarettebutt	50.5678115/7.2771179	DE	Sun Oct 04 2020	Oct	2020	Oct-2020	cigarettebutt
8920196	cigarettebutt	50.5678157/7.2771289	DE	Sun Oct 04 2020	Oct	2020	Oct-2020	cigarettebutt
8920195	cigarettebutt	50.5678179/7.2771203	DE	Sun Oct 04 2020	Oct	2020	Oct-2020	cigarettebutt
8920194	cigarettebutt	50.5678219/7.2771431	DE	Sun Oct 04 2020	Oct	2020	Oct-2020	cigarettebutt
8920192	cigarettebutt	50.5678136/7.2771314	DE	Sun Oct 04 2020	Oct	2020	Oct-2020	cigarettebutt
8920191	cigarettebutt	50.5678134/7.2771234	DE	Sun Oct 04 2020	Oct	2020	Oct-2020	cigarettebutt
8920190	cigarettebutt	50.5678063/7.2771228	DE	Sun Oct 04 2020	Oct	2020	Oct-2020	cigarettebutt
8920189	cigarettebutt	50.5678128/7.2771304	DE	Sun Oct 04 2020	Oct	2020	Oct-2020	cigarettebutt
8920188	cigarettebutt	50.5678128/7.2771203	DE	Sun Oct 04 2020	Oct	2020	Oct-2020	cigarettebutt
8920187	cigarettebutt	50.5678098/7.277114	DE	Sun Oct 04 2020	Oct	2020	Oct-2020	cigarettebutt
8920183	cigarettebutt	50.5678173/7.2771351	DE	Sun Oct 04 2020	Oct	2020	Oct-2020	cigarettebutt
8920182	cigarettebutt	50.5678088/7.2771165	DE	Sun Oct 04 2020	Oct	2020	Oct-2020	cigarettebutt
8920181	cigarettebutt	50.5678035/7.2771087	DE	Sun Oct 04 2020	Oct	2020	Oct-2020	cigarettebutt
8920180	cigarettebutt	50.5678084/7.2771044	DE	Sun Oct 04 2020	Oct	2020	Oct-2020	cigarettebutt
8920179	cigarettebutt	50.5678093/7.2771372	DE	Sun Oct 04 2020	Oct	2020	Oct-2020	cigarettebutt
8920176	cigarettebutt	50.5678066/7.2771648	DE	Sun Oct 04 2020	Oct	2020	Oct-2020	cigarettebutt
8920175	cigarettebutt	50.5678083/7.2771742	DE	Sun Oct 04 2020	Oct	2020	Oct-2020	cigarettebutt
8920174	cigarettebutt	50.5678134/7.2771841	DE	Sun Oct 04 2020	Oct	2020	Oct-2020	cigarettebutt
8920172	cigarettebutt	50.5678067/7.2771831	DE	Sun Oct 04 2020	Oct	2020	Oct-2020	cigarettebutt
8920170	cigarettebutt	50.5678047/7.2771734	DE	Sun Oct 04 2020	Oct	2020	Oct-2020	cigarettebutt
8920169	cigarettebutt	50.5678129/7.2771871	DE	Sun Oct 04 2020	Oct	2020	Oct-2020	cigarettebutt
8920167	cigarettebutt	50.567773/7.2772083	DE	Sun Oct 04 2020	Oct	2020	Oct-2020	cigarettebutt
8920166	cigarettebutt	50.5677989/7.2771557	DE	Sun Oct 04 2020	Oct	2020	Oct-2020	cigarettebutt
8920164	cigarettebutt	50.5677466/7.2772227	DE	Sun Oct 04 2020	Oct	2020	Oct-2020	cigarettebutt
8920163	cigarettebutt	50.5678114/7.277173	DE	Sun Oct 04 2020	Oct	2020	Oct-2020	cigarettebutt
8920162	cigarettebutt	50.5677679/7.2772168	DE	Sun Oct 04 2020	Oct	2020	Oct-2020	cigarettebutt
8920161	cigarettebutt	50.5677552/7.2772221	DE	Sun Oct 04 2020	Oct	2020	Oct-2020	cigarettebutt
8920160	cigarettebutt	50.5677637/7.2772233	DE	Sun Oct 04 2020	Oct	2020	Oct-2020	cigarettebutt
8920159	cigarettebutt	50.5677759/7.2771807	DE	Sun Oct 04 2020	Oct	2020	Oct-2020	cigarettebutt
8920155	cigarettebutt	50.5677578/7.2771967	DE	Sun Oct 04 2020	Oct	2020	Oct-2020	cigarettebutt
8920154	cigarettebutt	50.5677379/7.2772184	DE	Sun Oct 04 2020	Oct	2020	Oct-2020	cigarettebutt
8920153	cigarettebutt	50.5677737/7.277175	DE	Sun Oct 04 2020	Oct	2020	Oct-2020	cigarettebutt
8920152	cigarettebutt	50.5677594/7.2771947	DE	Sun Oct 04 2020	Oct	2020	Oct-2020	cigarettebutt
8920150	cigarettebutt	50.5677474/7.2771848	DE	Sun Oct 04 2020	Oct	2020	Oct-2020	cigarettebutt
8920149	cigarettebutt	50.5677642/7.2771933	DE	Sun Oct 04 2020	Oct	2020	Oct-2020	cigarettebutt
8920143	cigarettebutt	50.5677785/7.2771831	DE	Sun Oct 04 2020	Oct	2020	Oct-2020	cigarettebutt
8920141	cigarettebutt	50.5677755/7.2771751	DE	Sun Oct 04 2020	Oct	2020	Oct-2020	cigarettebutt
8920139	cigarettebutt	50.5677815/7.2771875	DE	Sun Oct 04 2020	Oct	2020	Oct-2020	cigarettebutt
8920138	cigarettebutt	50.5677746/7.277176	DE	Sun Oct 04 2020	Oct	2020	Oct-2020	cigarettebutt
8920130	cigarettebutt	50.5677573/7.2772122	DE	Sun Oct 04 2020	Oct	2020	Oct-2020	cigarettebutt
8920128	cigarettebutt	50.5677755/7.2771875	DE	Sun Oct 04 2020	Oct	2020	Oct-2020	cigarettebutt
8920122	cigarettebutt	50.5677804/7.2771893	DE	Sun Oct 04 2020	Oct	2020	Oct-2020	cigarettebutt
8920121	cigarettebutt	50.5677763/7.2771955	DE	Sun Oct 04 2020	Oct	2020	Oct-2020	cigarettebutt
8920120	cigarettebutt	50.5677732/7.2771915	DE	Sun Oct 04 2020	Oct	2020	Oct-2020	cigarettebutt
8920119	cigarettebutt	50.5677615/7.2772136	DE	Sun Oct 04 2020	Oct	2020	Oct-2020	cigarettebutt
8920118	cigarettebutt	50.5677561/7.2771922	DE	Sun Oct 04 2020	Oct	2020	Oct-2020	cigarettebutt
8920117	cigarettebutt	50.5677763/7.2771955	DE	Sun Oct 04 2020	Oct	2020	Oct-2020	cigarettebutt
8920116	cigarettebutt	50.5677651/7.277208	DE	Sun Oct 04 2020	Oct	2020	Oct-2020	cigarettebutt
8920110	cigarettebutt	50.5677642/7.2771846	DE	Sun Oct 04 2020	Oct	2020	Oct-2020	cigarettebutt
8920103	cigarettebutt	50.5677313/7.2772257	DE	Sun Oct 04 2020	Oct	2020	Oct-2020	cigarettebutt
8920102	cigarettebutt	50.5677207/7.2772386	DE	Sun Oct 04 2020	Oct	2020	Oct-2020	cigarettebutt
8920099	cigarettebutt	50.5677259/7.2772297	DE	Sun Oct 04 2020	Oct	2020	Oct-2020	cigarettebutt
8920096	cigarettebutt	50.5677253/7.2772153	DE	Sun Oct 04 2020	Oct	2020	Oct-2020	cigarettebutt
8920095	cigarettebutt	50.5677467/7.2772048	DE	Sun Oct 04 2020	Oct	2020	Oct-2020	cigarettebutt
8920090	cigarettebutt	50.5677132/7.2772584	DE	Sun Oct 04 2020	Oct	2020	Oct-2020	cigarettebutt
8920089	cigarettebutt	50.5677077/7.2772739	DE	Sun Oct 04 2020	Oct	2020	Oct-2020	cigarettebutt
8920088	cigarettebutt	50.5677233/7.2772217	DE	Sun Oct 04 2020	Oct	2020	Oct-2020	cigarettebutt
8920087	cigarettebutt	50.5677442/7.2772155	DE	Sun Oct 04 2020	Oct	2020	Oct-2020	cigarettebutt
8920086	cigarettebutt	50.5677202/7.2772533	DE	Sun Oct 04 2020	Oct	2020	Oct-2020	cigarettebutt
8920085	cigarettebutt	50.56772/7.2772024	DE	Sun Oct 04 2020	Oct	2020	Oct-2020	cigarettebutt
8920084	cigarettebutt	50.5677086/7.27721	DE	Sun Oct 04 2020	Oct	2020	Oct-2020	cigarettebutt
8920083	cigarettebutt	50.5677392/7.2772334	DE	Sun Oct 04 2020	Oct	2020	Oct-2020	cigarettebutt
8920082	cigarettebutt	50.5677393/7.2772167	DE	Sun Oct 04 2020	Oct	2020	Oct-2020	cigarettebutt
8920080	bottle	50.5676184/7.2771951	DE	Sun Oct 04 2020	Oct	2020	Oct-2020	bottle
8920073	cigarettebutt	50.5676937/7.2772085	DE	Sun Oct 04 2020	Oct	2020	Oct-2020	cigarettebutt
8920063	coffeecup	50.5676246/7.277211	DE	Sun Oct 04 2020	Oct	2020	Oct-2020	coffeecup
8920062	bottle	50.5676293/7.2772279	DE	Sun Oct 04 2020	Oct	2020	Oct-2020	bottle
8920059	cigarettebutt	50.5676176/7.2772278	DE	Sun Oct 04 2020	Oct	2020	Oct-2020	cigarettebutt
8920051	cigarettebutt	50.567588/7.2771667	DE	Sun Oct 04 2020	Oct	2020	Oct-2020	cigarettebutt
8920048	cigarettebutt	50.5675823/7.277214	DE	Sun Oct 04 2020	Oct	2020	Oct-2020	cigarettebutt
8920038	cigarettebutt	50.5675899/7.2771707	DE	Sun Oct 04 2020	Oct	2020	Oct-2020	cigarettebutt
8919713	cigarettebutt	50.5674342/7.2778142	DE	Sun Oct 04 2020	Oct	2020	Oct-2020	cigarettebutt
8919712	cigarettebutt	50.5674508/7.2778512	DE	Sun Oct 04 2020	Oct	2020	Oct-2020	cigarettebutt
8919708	cigarettebutt	50.5674552/7.2778555	DE	Sun Oct 04 2020	Oct	2020	Oct-2020	cigarettebutt
8919706	cigarettebutt	50.5674684/7.2778581	DE	Sun Oct 04 2020	Oct	2020	Oct-2020	cigarettebutt
8919704	cigarettebutt	50.5674726/7.2778492	DE	Sun Oct 04 2020	Oct	2020	Oct-2020	cigarettebutt
8919703	cigarettebutt	50.5674725/7.2778576	DE	Sun Oct 04 2020	Oct	2020	Oct-2020	cigarettebutt
8919702	cigarettebutt	50.5674684/7.2778581	DE	Sun Oct 04 2020	Oct	2020	Oct-2020	cigarettebutt
8919700	cigarettebutt	50.5674156/7.2778338	DE	Sun Oct 04 2020	Oct	2020	Oct-2020	cigarettebutt
8919699	cigarettebutt	50.5674071/7.2778596	DE	Sun Oct 04 2020	Oct	2020	Oct-2020	cigarettebutt
8919698	cigarettebutt	50.5674041/7.2778708	DE	Sun Oct 04 2020	Oct	2020	Oct-2020	cigarettebutt
8919697	cigarettebutt	50.5674233/7.2778131	DE	Sun Oct 04 2020	Oct	2020	Oct-2020	cigarettebutt
8919696	cigarettebutt	50.5674142/7.2778954	DE	Sun Oct 04 2020	Oct	2020	Oct-2020	cigarettebutt
8919695	cigarettebutt	50.5674174/7.2779016	DE	Sun Oct 04 2020	Oct	2020	Oct-2020	cigarettebutt
8919694	cigarettebutt	50.5674146/7.2778026	DE	Sun Oct 04 2020	Oct	2020	Oct-2020	cigarettebutt
8919693	cigarettebutt	50.5674141/7.2778077	DE	Sun Oct 04 2020	Oct	2020	Oct-2020	cigarettebutt
8919692	cigarettebutt	50.5674109/7.2778483	DE	Sun Oct 04 2020	Oct	2020	Oct-2020	cigarettebutt
8919691	cigarettebutt	50.5674036/7.2778657	DE	Sun Oct 04 2020	Oct	2020	Oct-2020	cigarettebutt
8919689	cigarettebutt	50.5674166/7.2779028	DE	Sun Oct 04 2020	Oct	2020	Oct-2020	cigarettebutt
8919688	cigarettebutt	50.5674082/7.2778938	DE	Sun Oct 04 2020	Oct	2020	Oct-2020	cigarettebutt
8919687	cigarettebutt	50.5674342/7.2778142	DE	Sun Oct 04 2020	Oct	2020	Oct-2020	cigarettebutt
8919686	cigarettebutt	50.567414/7.2778416	DE	Sun Oct 04 2020	Oct	2020	Oct-2020	cigarettebutt
8919685	cigarettebutt	50.5674143/7.2778143	DE	Sun Oct 04 2020	Oct	2020	Oct-2020	cigarettebutt
8919601	cigarettebutt	50.567409/7.2778182	DE	Sun Oct 04 2020	Oct	2020	Oct-2020	cigarettebutt
8919598	cigarettebutt	50.5673912/7.2778855	DE	Sun Oct 04 2020	Oct	2020	Oct-2020	cigarettebutt
8919594	cigarettebutt	50.5673821/7.2778955	DE	Sun Oct 04 2020	Oct	2020	Oct-2020	cigarettebutt
8919593	cigarettebutt	50.5673929/7.2778715	DE	Sun Oct 04 2020	Oct	2020	Oct-2020	cigarettebutt
8919590	cigarettebutt	50.5674246/7.2778546	DE	Sun Oct 04 2020	Oct	2020	Oct-2020	cigarettebutt
8919589	cigarettebutt	50.5674228/7.2778164	DE	Sun Oct 04 2020	Oct	2020	Oct-2020	cigarettebutt
8919588	cigarettebutt	50.5674206/7.2778595	DE	Sun Oct 04 2020	Oct	2020	Oct-2020	cigarettebutt
8919587	cigarettebutt	50.5674231/7.2778574	DE	Sun Oct 04 2020	Oct	2020	Oct-2020	cigarettebutt
8919584	cigarettebutt	50.5674236/7.2778771	DE	Sun Oct 04 2020	Oct	2020	Oct-2020	cigarettebutt
8919583	cigarettebutt	50.5673995/7.2778876	DE	Sun Oct 04 2020	Oct	2020	Oct-2020	cigarettebutt
8919582	cigarettebutt	50.5673754/7.2778858	DE	Sun Oct 04 2020	Oct	2020	Oct-2020	cigarettebutt
8919578	cigarettebutt	50.567434/7.2778356	DE	Sun Oct 04 2020	Oct	2020	Oct-2020	cigarettebutt
8919577	cigarettebutt	50.5673927/7.277891	DE	Sun Oct 04 2020	Oct	2020	Oct-2020	cigarettebutt
8919576	cigarettebutt	50.5674054/7.2778557	DE	Sun Oct 04 2020	Oct	2020	Oct-2020	cigarettebutt
8919575	cigarettebutt	50.5672362/7.2779474	DE	Sun Oct 04 2020	Oct	2020	Oct-2020	cigarettebutt
8919574	cigarettebutt	50.5672257/7.2779689	DE	Sun Oct 04 2020	Oct	2020	Oct-2020	cigarettebutt
8919573	cigarettebutt	50.5672883/7.2779574	DE	Sun Oct 04 2020	Oct	2020	Oct-2020	cigarettebutt
8919572	cigarettebutt	50.567283/7.2779531	DE	Sun Oct 04 2020	Oct	2020	Oct-2020	cigarettebutt
8919570	cigarettebutt	50.5672332/7.2779423	DE	Sun Oct 04 2020	Oct	2020	Oct-2020	cigarettebutt
8919569	cigarettebutt	50.5673114/7.2779692	DE	Sun Oct 04 2020	Oct	2020	Oct-2020	cigarettebutt
8919568	cigarettebutt	50.5672201/7.2779565	DE	Sun Oct 04 2020	Oct	2020	Oct-2020	cigarettebutt
8919567	cigarettebutt	50.5672185/7.2779556	DE	Sun Oct 04 2020	Oct	2020	Oct-2020	cigarettebutt
8919566	cigarettebutt	50.5672173/7.2779495	DE	Sun Oct 04 2020	Oct	2020	Oct-2020	cigarettebutt
8919565	cigarettebutt	50.5672185/7.2779556	DE	Sun Oct 04 2020	Oct	2020	Oct-2020	cigarettebutt
8919564	cigarettebutt	50.5672393/7.2779443	DE	Sun Oct 04 2020	Oct	2020	Oct-2020	cigarettebutt
8919562	cigarettebutt	50.5672152/7.2779474	DE	Sun Oct 04 2020	Oct	2020	Oct-2020	cigarettebutt
8919561	cigarettebutt	50.5672224/7.2779404	DE	Sun Oct 04 2020	Oct	2020	Oct-2020	cigarettebutt
8919559	cigarettebutt	50.5672187/7.2779461	DE	Sun Oct 04 2020	Oct	2020	Oct-2020	cigarettebutt
8919557	cigarettebutt	50.56722/7.2779851	DE	Sun Oct 04 2020	Oct	2020	Oct-2020	cigarettebutt
8919556	cigarettebutt	50.56722/7.2779851	DE	Sun Oct 04 2020	Oct	2020	Oct-2020	cigarettebutt
8919555	cigarettebutt	50.5672166/7.2780006	DE	Sun Oct 04 2020	Oct	2020	Oct-2020	cigarettebutt
8919553	cigarettebutt	50.5671119/7.2780359	DE	Sun Oct 04 2020	Oct	2020	Oct-2020	cigarettebutt
8919551	cigarettebutt	50.5672196/7.2779853	DE	Sun Oct 04 2020	Oct	2020	Oct-2020	cigarettebutt
8919547	cigarettebutt	50.5672287/7.2780034	DE	Sun Oct 04 2020	Oct	2020	Oct-2020	cigarettebutt
8919546	cigarettebutt	50.5672362/7.2780003	DE	Sun Oct 04 2020	Oct	2020	Oct-2020	cigarettebutt
8919542	cigarettebutt	50.5671278/7.2780411	DE	Sun Oct 04 2020	Oct	2020	Oct-2020	cigarettebutt
8919540	cigarettebutt	50.567134/7.2780374	DE	Sun Oct 04 2020	Oct	2020	Oct-2020	cigarettebutt
8919538	cigarettebutt	50.5672297/7.2780248	DE	Sun Oct 04 2020	Oct	2020	Oct-2020	cigarettebutt
8919536	cigarettebutt	50.5671178/7.2780347	DE	Sun Oct 04 2020	Oct	2020	Oct-2020	cigarettebutt
8919535	cigarettebutt	50.567066/7.2781106	DE	Sun Oct 04 2020	Oct	2020	Oct-2020	cigarettebutt
8919534	cigarettebutt	50.5671187/7.2780372	DE	Sun Oct 04 2020	Oct	2020	Oct-2020	cigarettebutt
8919533	cigarettebutt	50.5671156/7.2780398	DE	Sun Oct 04 2020	Oct	2020	Oct-2020	cigarettebutt
8919532	plastic	50.5670579/7.2781017	DE	Sun Oct 04 2020	Oct	2020	Oct-2020	plastic
8919531	cigarettebutt	50.567074/7.2780606	DE	Sun Oct 04 2020	Oct	2020	Oct-2020	cigarettebutt
8919530	cigarettebutt	50.5670958/7.2780347	DE	Sun Oct 04 2020	Oct	2020	Oct-2020	cigarettebutt
8919529	cigarettebutt	50.5670713/7.2780614	DE	Sun Oct 04 2020	Oct	2020	Oct-2020	cigarettebutt
8919527	cigarettebutt	50.5671161/7.2780359	DE	Sun Oct 04 2020	Oct	2020	Oct-2020	cigarettebutt
8919525	cigarettebutt	50.5671046/7.2780362	DE	Sun Oct 04 2020	Oct	2020	Oct-2020	cigarettebutt
8919524	cigarettebutt	50.5670713/7.2780522	DE	Sun Oct 04 2020	Oct	2020	Oct-2020	cigarettebutt
8919523	cigarettebutt	50.5670576/7.2780896	DE	Sun Oct 04 2020	Oct	2020	Oct-2020	cigarettebutt
8919522	cigarettebutt	50.5670826/7.2780415	DE	Sun Oct 04 2020	Oct	2020	Oct-2020	cigarettebutt
8919521	cigarettebutt	50.567062/7.2781104	DE	Sun Oct 04 2020	Oct	2020	Oct-2020	cigarettebutt
8919520	cigarettebutt	50.5671125/7.2780435	DE	Sun Oct 04 2020	Oct	2020	Oct-2020	cigarettebutt
8919516	cigarettebutt	50.5669618/7.2781085	DE	Sun Oct 04 2020	Oct	2020	Oct-2020	cigarettebutt
8919515	cigarettebutt	50.5670369/7.2781117	DE	Sun Oct 04 2020	Oct	2020	Oct-2020	cigarettebutt
8919514	cigarettebutt	50.5668634/7.2780727	DE	Sun Oct 04 2020	Oct	2020	Oct-2020	cigarettebutt
8919513	cigarettebutt	50.5669405/7.2780861	DE	Sun Oct 04 2020	Oct	2020	Oct-2020	cigarettebutt
8919512	cigarettebutt	50.5668797/7.2780848	DE	Sun Oct 04 2020	Oct	2020	Oct-2020	cigarettebutt
8919511	cigarettebutt	50.5670155/7.2781276	DE	Sun Oct 04 2020	Oct	2020	Oct-2020	cigarettebutt
8919507	cigarettebutt	50.5669191/7.2780671	DE	Sun Oct 04 2020	Oct	2020	Oct-2020	cigarettebutt
8919506	cigarettebutt	50.5669405/7.2780616	DE	Sun Oct 04 2020	Oct	2020	Oct-2020	cigarettebutt
8919504	cigarettebutt	50.56705/7.2781095	DE	Sun Oct 04 2020	Oct	2020	Oct-2020	cigarettebutt
8919503	cigarettebutt	50.5670498/7.2781092	DE	Sun Oct 04 2020	Oct	2020	Oct-2020	cigarettebutt
8919502	cigarettebutt	50.5669398/7.278076	DE	Sun Oct 04 2020	Oct	2020	Oct-2020	cigarettebutt
8919501	cigarettebutt	50.5669569/7.2780955	DE	Sun Oct 04 2020	Oct	2020	Oct-2020	cigarettebutt
8919498	cigarettebutt	50.5669803/7.2781305	DE	Sun Oct 04 2020	Oct	2020	Oct-2020	cigarettebutt
8919497	cigarettebutt	50.5667151/7.2782154	DE	Sun Oct 04 2020	Oct	2020	Oct-2020	cigarettebutt
8919496	cigarettebutt	50.5667244/7.2781054	DE	Sun Oct 04 2020	Oct	2020	Oct-2020	cigarettebutt
8919495	cigarettebutt	50.566706/7.2782353	DE	Sun Oct 04 2020	Oct	2020	Oct-2020	cigarettebutt
8919494	cigarettebutt	50.5665175/7.2782924	DE	Sun Oct 04 2020	Oct	2020	Oct-2020	cigarettebutt
8919493	cigarettebutt	50.56667/7.2782252	DE	Sun Oct 04 2020	Oct	2020	Oct-2020	cigarettebutt
8919492	cigarettebutt	50.5665303/7.2782829	DE	Sun Oct 04 2020	Oct	2020	Oct-2020	cigarettebutt
8919491	cigarettebutt	50.5665333/7.2782726	DE	Sun Oct 04 2020	Oct	2020	Oct-2020	cigarettebutt
8919490	cigarettebutt	50.5666939/7.2782294	DE	Sun Oct 04 2020	Oct	2020	Oct-2020	cigarettebutt
8919488	cigarettebutt	50.5667554/7.278054	DE	Sun Oct 04 2020	Oct	2020	Oct-2020	cigarettebutt
8919487	coffeecup	50.5665149/7.2782906	DE	Sun Oct 04 2020	Oct	2020	Oct-2020	coffeecup
8919485	cigarettebutt	50.5665162/7.2783244	DE	Sun Oct 04 2020	Oct	2020	Oct-2020	cigarettebutt
8919484	cigarettebutt	50.5665317/7.2783552	DE	Sun Oct 04 2020	Oct	2020	Oct-2020	cigarettebutt
8919483	cigarettebutt	50.5668461/7.2780207	DE	Sun Oct 04 2020	Oct	2020	Oct-2020	cigarettebutt
8919480	cigarettebutt	50.5665206/7.2783497	DE	Sun Oct 04 2020	Oct	2020	Oct-2020	cigarettebutt
8919479	cigarettebutt	50.5668369/7.277989	DE	Sun Oct 04 2020	Oct	2020	Oct-2020	cigarettebutt
8919476	cigarettebutt	50.5665191/7.2783567	DE	Sun Oct 04 2020	Oct	2020	Oct-2020	cigarettebutt
8919475	cigarettebutt	50.5664616/7.2784611	DE	Sun Oct 04 2020	Oct	2020	Oct-2020	cigarettebutt
8919474	cigarettebutt	50.5665296/7.2783733	DE	Sun Oct 04 2020	Oct	2020	Oct-2020	cigarettebutt
8919473	cigarettebutt	50.566535/7.2783724	DE	Sun Oct 04 2020	Oct	2020	Oct-2020	cigarettebutt
8919470	cigarettebutt	50.5663746/7.2787107	DE	Sun Oct 04 2020	Oct	2020	Oct-2020	cigarettebutt
8919469	cigarettebutt	50.5664329/7.278604	DE	Sun Oct 04 2020	Oct	2020	Oct-2020	cigarettebutt
8919468	cigarettebutt	50.5664408/7.2785557	DE	Sun Oct 04 2020	Oct	2020	Oct-2020	cigarettebutt
8919467	cigarettebutt	50.5660161/7.2791364	DE	Sun Oct 04 2020	Oct	2020	Oct-2020	cigarettebutt
8919464	cigarettebutt	50.5662785/7.2788362	DE	Sun Oct 04 2020	Oct	2020	Oct-2020	cigarettebutt
8919462	cigarettebutt	50.5662671/7.2788284	DE	Sun Oct 04 2020	Oct	2020	Oct-2020	cigarettebutt
8919461	cigarettebutt	50.5660559/7.2789814	DE	Sun Oct 04 2020	Oct	2020	Oct-2020	cigarettebutt
8919460	cigarettebutt	50.566123/7.2788535	DE	Sun Oct 04 2020	Oct	2020	Oct-2020	cigarettebutt
8919459	cigarettebutt	50.566012/7.2790584	DE	Sun Oct 04 2020	Oct	2020	Oct-2020	cigarettebutt
8919458	cigarettebutt	50.5660679/7.2789247	DE	Sun Oct 04 2020	Oct	2020	Oct-2020	cigarettebutt
8919062	plastic	52.4349209/13.2547969	DE	Sun Oct 04 2020	Oct	2020	Oct-2020	plastic
8919061	plastic	52.4349209/13.2547969	DE	Sun Oct 04 2020	Oct	2020	Oct-2020	plastic
8919060	plastic	52.4349209/13.2547969	DE	Sun Oct 04 2020	Oct	2020	Oct-2020	plastic
8919058	plastic	52.4349209/13.2547969	DE	Sun Oct 04 2020	Oct	2020	Oct-2020	plastic
8919057	cigarettebutt	52.4349209/13.2547969	DE	Sun Oct 04 2020	Oct	2020	Oct-2020	cigarettebutt
8919056	bottlecap	52.4349209/13.2547969	DE	Sun Oct 04 2020	Oct	2020	Oct-2020	bottlecap
8919055	bottlecap	52.4349209/13.2547969	DE	Sun Oct 04 2020	Oct	2020	Oct-2020	bottlecap
8919054	bottlecap	52.4349209/13.2547969	DE	Sun Oct 04 2020	Oct	2020	Oct-2020	bottlecap
8919053	bottlecap	52.4349209/13.2547969	DE	Sun Oct 04 2020	Oct	2020	Oct-2020	bottlecap
8919052	candy, plastic	52.4349209/13.2547969	DE	Sun Oct 04 2020	Oct	2020	Oct-2020	candy	plastic
8919051	bottlecap	52.4349209/13.2547969	DE	Sun Oct 04 2020	Oct	2020	Oct-2020	bottlecap
8919050	bottlecap	52.4349209/13.2547969	DE	Sun Oct 04 2020	Oct	2020	Oct-2020	bottlecap
8919049	straw	52.4349209/13.2547969	DE	Sun Oct 04 2020	Oct	2020	Oct-2020	straw
8919048	plastic	52.4349209/13.2547969	DE	Sun Oct 04 2020	Oct	2020	Oct-2020	plastic
8919047	glass, bottle	52.4349209/13.2547969	DE	Sun Oct 04 2020	Oct	2020	Oct-2020	glass	bottle
8919046	beer, glassbottle	52.4349209/13.2547969	DE	Sun Oct 04 2020	Oct	2020	Oct-2020	beer	glassbottle
8919045	bottlecap	52.4349209/13.2547969	DE	Sun Oct 04 2020	Oct	2020	Oct-2020	bottlecap
8919044	bottlecap	52.4349209/13.2547969	DE	Sun Oct 04 2020	Oct	2020	Oct-2020	bottlecap
8919043	plastic	52.4349209/13.2547969	DE	Sun Oct 04 2020	Oct	2020	Oct-2020	plastic
8919042	plastic	52.4349209/13.2547969	DE	Sun Oct 04 2020	Oct	2020	Oct-2020	plastic
8919041	plastic	52.4349209/13.2547969	DE	Sun Oct 04 2020	Oct	2020	Oct-2020	plastic
8919040	plastic	52.4349209/13.2547969	DE	Sun Oct 04 2020	Oct	2020	Oct-2020	plastic
8919039	bottle, plastic	52.4349209/13.2547969	DE	Sun Oct 04 2020	Oct	2020	Oct-2020	bottle	plastic
8919038	bottlecap	52.4349209/13.2547969	DE	Sun Oct 04 2020	Oct	2020	Oct-2020	bottlecap
8919037	plastic	52.4349209/13.2547969	DE	Sun Oct 04 2020	Oct	2020	Oct-2020	plastic
8919036	bottlecap	52.4349209/13.2547969	DE	Sun Oct 04 2020	Oct	2020	Oct-2020	bottlecap
8919035	plastic	52.4349209/13.2547969	DE	Sun Oct 04 2020	Oct	2020	Oct-2020	plastic
8919034	plastic	52.4349209/13.2547969	DE	Sun Oct 04 2020	Oct	2020	Oct-2020	plastic
8919033	plastic	52.4349209/13.2547969	DE	Sun Oct 04 2020	Oct	2020	Oct-2020	plastic
8919032	plastic	52.4349209/13.2547969	DE	Sun Oct 04 2020	Oct	2020	Oct-2020	plastic
8919031	plastic	52.4349209/13.2547969	DE	Sun Oct 04 2020	Oct	2020	Oct-2020	plastic
8919030	bottlecap	52.4349209/13.2547969	DE	Sun Oct 04 2020	Oct	2020	Oct-2020	bottlecap
8919029	plastic	52.4349209/13.2547969	DE	Sun Oct 04 2020	Oct	2020	Oct-2020	plastic
8919027	plastic	52.4349209/13.2547969	DE	Sun Oct 04 2020	Oct	2020	Oct-2020	plastic
8919025	plastic	52.4349209/13.2547969	DE	Sun Oct 04 2020	Oct	2020	Oct-2020	plastic
8919024	bottlecap	52.4349209/13.2547969	DE	Sun Oct 04 2020	Oct	2020	Oct-2020	bottlecap
8919023	plastic	52.4349209/13.2547969	DE	Sun Oct 04 2020	Oct	2020	Oct-2020	plastic
8919020	plastic	52.4349209/13.2547969	DE	Sun Oct 04 2020	Oct	2020	Oct-2020	plastic
8919019	plastic	52.4349209/13.2547969	DE	Sun Oct 04 2020	Oct	2020	Oct-2020	plastic
8919018	plastic	52.4349209/13.2547969	DE	Sun Oct 04 2020	Oct	2020	Oct-2020	plastic
8919017	condom	52.4349209/13.2547969	DE	Sun Oct 04 2020	Oct	2020	Oct-2020	condom
8919016	plastic	52.4349209/13.2547969	DE	Sun Oct 04 2020	Oct	2020	Oct-2020	plastic
8919015	glass, bottle, alcohol	52.4349209/13.2547969	DE	Sun Oct 04 2020	Oct	2020	Oct-2020	glass	bottle	alcohol
8915542	mcdonalds, bag, paper	49.6665651187466/8.44474298040628	DE	Sun Oct 04 2020	Oct	2020	Oct-2020	mcdonalds	bag	paper
8915529	mcdonald's, paper	49.6662742199126/8.44463820989363	DE	Sun Oct 04 2020	Oct	2020	Oct-2020	mcdonald's	paper
8908251	plastic, blister	48.1835282/10.751282	DE	Sun Oct 04 2020	Oct	2020	Oct-2020	plastic	blister
8908249	plastic, garbagebag	48.1837219/10.7512363	DE	Sun Oct 04 2020	Oct	2020	Oct-2020	plastic	garbagebag
8908248	plastic, plasticbag	48.18372/10.7512001	DE	Sun Oct 04 2020	Oct	2020	Oct-2020	plastic	plasticbag
8908200	plastic, plasticbag, dogshitbag	48.1842551/10.7506274	DE	Sun Oct 04 2020	Oct	2020	Oct-2020	plastic	plasticbag	dogshitbag
8908082	wrapper, candywrapper	48.1842706/10.7506248	DE	Sun Oct 04 2020	Oct	2020	Oct-2020	wrapper	candywrapper
8908021	plastic, plasticbag	48.1842985/10.7506219	DE	Sun Oct 04 2020	Oct	2020	Oct-2020	plastic	plasticbag
8908020	plastic, wrapper, candywrapper	48.1842974/10.7506307	DE	Sun Oct 04 2020	Oct	2020	Oct-2020	plastic	wrapper	candywrapper
8908018	bottlecap	48.1844928/10.7503109	DE	Sun Oct 04 2020	Oct	2020	Oct-2020	bottlecap
8907977	fabric, polyester	48.1829074/10.7505077	DE	Sun Oct 04 2020	Oct	2020	Oct-2020	fabric	polyester
8906714	fabric	48.185592/10.7487477	DE	Sun Oct 04 2020	Oct	2020	Oct-2020	fabric
8906712	wrapper, plastic	48.1857386/10.7489827	DE	Sun Oct 04 2020	Oct	2020	Oct-2020	wrapper	plastic
8906669	plastic, label	48.1859652/10.7464761	DE	Sun Oct 04 2020	Oct	2020	Oct-2020	plastic	label
8906568	plastic, bag, dogpoobag	48.1858383/10.7463716	DE	Sun Oct 04 2020	Oct	2020	Oct-2020	plastic	bag	dogpoobag
8906508	plastic, dogpoobag, plasticbag	48.185848/10.7464847	DE	Sun Oct 04 2020	Oct	2020	Oct-2020	plastic	dogpoobag	plasticbag
8906375	plastic	48.1838933/10.7468804	DE	Sun Oct 04 2020	Oct	2020	Oct-2020	plastic
8906331	bottle, glassbottle	48.1838927/10.7468354	DE	Sun Oct 04 2020	Oct	2020	Oct-2020	bottle	glassbottle
8906316	candywrapper, plastic	48.1838922/10.7476134	DE	Sun Oct 04 2020	Oct	2020	Oct-2020	candywrapper	plastic
8906313	plastic, tissuepack	48.1839743/10.7476626	DE	Sun Oct 04 2020	Oct	2020	Oct-2020	plastic	tissuepack
8906303	plastic, wrapper	48.1840631/10.7477664	DE	Sun Oct 04 2020	Oct	2020	Oct-2020	plastic	wrapper
8906298	facemask	48.1841589/10.7478439	DE	Sun Oct 04 2020	Oct	2020	Oct-2020	facemask
8906293	breadbag, paper	48.1841602/10.7478574	DE	Sun Oct 04 2020	Oct	2020	Oct-2020	breadbag	paper
8906291	candywrapper, plastic, wrapper	48.1841741/10.7478857	DE	Sun Oct 04 2020	Oct	2020	Oct-2020	candywrapper	plastic	wrapper
8906290	bottlecap	48.18418/10.7478784	DE	Sun Oct 04 2020	Oct	2020	Oct-2020	bottlecap
8906251	bottlecap	48.1841844/10.7478743	DE	Sun Oct 04 2020	Oct	2020	Oct-2020	bottlecap
8906250	plastic, plasticbag	48.1841872/10.7478576	DE	Sun Oct 04 2020	Oct	2020	Oct-2020	plastic	plasticbag
8906248	plastic, label	48.1841804/10.7478514	DE	Sun Oct 04 2020	Oct	2020	Oct-2020	plastic	label
8906247	plastic	48.184179/10.7478435	DE	Sun Oct 04 2020	Oct	2020	Oct-2020	plastic
8906231	plastic, surpriseegg	48.1841832/10.7479003	DE	Sun Oct 04 2020	Oct	2020	Oct-2020	plastic	surpriseegg
8906229	icecreamstick	48.1841763/10.7479111	DE	Sun Oct 04 2020	Oct	2020	Oct-2020	icecreamstick
8906228	dogpoobag, plastic	48.1841936/10.7478449	DE	Sun Oct 04 2020	Oct	2020	Oct-2020	dogpoobag	plastic
8906225	wrapper, plastic	48.184241/10.7478365	DE	Sun Oct 04 2020	Oct	2020	Oct-2020	wrapper	plastic
8906223	plastic, wrapper	48.1842404/10.7478249	DE	Sun Oct 04 2020	Oct	2020	Oct-2020	plastic	wrapper
8906222	pulltab	48.1842293/10.7478074	DE	Sun Oct 04 2020	Oct	2020	Oct-2020	pulltab
8906221	plastic, wrapper	48.1842606/10.7478218	DE	Sun Oct 04 2020	Oct	2020	Oct-2020	plastic	wrapper
8906220	plastic, wrapper	48.1843062/10.7479051	DE	Sun Oct 04 2020	Oct	2020	Oct-2020	plastic	wrapper
8906219	wrapper, plastic	48.1842937/10.7479062	DE	Sun Oct 04 2020	Oct	2020	Oct-2020	wrapper	plastic
8906217	plastic, wrapper, candywrapper	48.1843019/10.7479495	DE	Sun Oct 04 2020	Oct	2020	Oct-2020	plastic	wrapper	candywrapper
8906207	wrapper, plastic	48.1843545/10.7479616	DE	Sun Oct 04 2020	Oct	2020	Oct-2020	wrapper	plastic
8906126	plastic, wrapper	48.1845283/10.7479169	DE	Sun Oct 04 2020	Oct	2020	Oct-2020	plastic	wrapper
8906112	label, polyester	48.1841894/10.7484077	DE	Sun Oct 04 2020	Oct	2020	Oct-2020	label	polyester
8906091	babywipe	48.1842188/10.7484494	DE	Sun Oct 04 2020	Oct	2020	Oct-2020	babywipe
8906065	babywipe	48.1836672/10.7493304	DE	Sun Oct 04 2020	Oct	2020	Oct-2020	babywipe
8906063	wrapper, plastic	48.1836685/10.7493477	DE	Sun Oct 04 2020	Oct	2020	Oct-2020	wrapper	plastic
8906062	plastic, wrapper	48.1836926/10.7493618	DE	Sun Oct 04 2020	Oct	2020	Oct-2020	plastic	wrapper
8906061	wrapper, candywrapper	48.183686/10.749359	DE	Sun Oct 04 2020	Oct	2020	Oct-2020	wrapper	candywrapper
8906053	plastic, plasticbag	48.1836749/10.7493624	DE	Sun Oct 04 2020	Oct	2020	Oct-2020	plastic	plasticbag
8906052	plastic, wrapper	48.1836777/10.7494375	DE	Sun Oct 04 2020	Oct	2020	Oct-2020	plastic	wrapper
8906051	plastic, wrapper, candy	48.1837555/10.7506526	DE	Sun Oct 04 2020	Oct	2020	Oct-2020	plastic	wrapper	candy
8906050	candy, candywrapper, plastic	48.1837627/10.7506702	DE	Sun Oct 04 2020	Oct	2020	Oct-2020	candy	candywrapper	plastic
8905984	plastic, plasticbag	48.1837441/10.7507202	DE	Sun Oct 04 2020	Oct	2020	Oct-2020	plastic	plasticbag
8905949	facemask	48.1837472/10.7507091	DE	Sun Oct 04 2020	Oct	2020	Oct-2020	facemask
8905948	ketchuppacket, mustardpacket, plastic	48.1837229/10.750708	DE	Sun Oct 04 2020	Oct	2020	Oct-2020	ketchuppacket	mustardpacket	plastic
8905947	plastic, wrapper	48.1837421/10.7507164	DE	Sun Oct 04 2020	Oct	2020	Oct-2020	plastic	wrapper
8905946	plastic, plasticspoon	48.183757/10.7507308	DE	Sun Oct 04 2020	Oct	2020	Oct-2020	plastic	plasticspoon
8905943	plastic	48.1837421/10.7507476	DE	Sun Oct 04 2020	Oct	2020	Oct-2020	plastic
8905942	plastic	48.1837944/10.7507692	DE	Sun Oct 04 2020	Oct	2020	Oct-2020	plastic
8905941	plastic, yoghurtpot	48.1837944/10.7507692	DE	Sun Oct 04 2020	Oct	2020	Oct-2020	plastic	yoghurtpot
8905940	paper, papercup	48.1828904/10.7511355	DE	Sun Oct 04 2020	Oct	2020	Oct-2020	paper	papercup
8905923	drinkcarton	48.1826388/10.7514881	DE	Sun Oct 04 2020	Oct	2020	Oct-2020	drinkcarton
8905883	plastic, garbage	48.1826661/10.7513853	DE	Sun Oct 04 2020	Oct	2020	Oct-2020	plastic	garbage
8905881	plastic, wrapper	48.1826686/10.7513474	DE	Sun Oct 04 2020	Oct	2020	Oct-2020	plastic	wrapper
8905880	plasticcup, whippedcreamcontainer	48.1824715/10.7515356	DE	Sun Oct 04 2020	Oct	2020	Oct-2020	plasticcup	whippedcreamcontainer
8905867	diaper	48.1823881/10.7515528	DE	Sun Oct 04 2020	Oct	2020	Oct-2020	diaper
8905865	plastic, wrapper	48.1823564/10.7515383	DE	Sun Oct 04 2020	Oct	2020	Oct-2020	plastic	wrapper
8905864	straw, plastic	48.1822309/10.7515809	DE	Sun Oct 04 2020	Oct	2020	Oct-2020	straw	plastic
8905863	cigarettepack, winston.	48.1819194/10.7515742	DE	Sun Oct 04 2020	Oct	2020	Oct-2020	cigarettepack	winston.
8905726	wrapper, paper, lowcadmium, cadmium, gabun, gabun80percent, chocolate	48.6561355367756/8.21824550629428	DE	Sat Oct 03 2020	Oct	2020	Oct-2020	wrapper	paper	lowcadmium	cadmium	gabun	gabun80percent	chocolate
8905723	paper, tissue	48.6560417851886/8.21843393147757	DE	Sat Oct 03 2020	Oct	2020	Oct-2020	paper	tissue
8905721	chocolatrabiat, groberrustikalerkakao, paper, wrapper, chocolate	48.6559444293833/8.21836603806188	DE	Sat Oct 03 2020	Oct	2020	Oct-2020	chocolatrabiat	groberrustikalerkakao	paper	wrapper	chocolate
8905714	metal, ring, sodacanopener	48.6560503766394/8.21913910099139	DE	Sat Oct 03 2020	Oct	2020	Oct-2020	metal	ring	sodacanopener
8905703	glass, shard	48.6562106805375/8.2190162222909	DE	Sat Oct 03 2020	Oct	2020	Oct-2020	glass	shard
8905693	glass, shard	48.6562106805375/8.2190162222909	DE	Sat Oct 03 2020	Oct	2020	Oct-2020	glass	shard
8905692	paper, tissue	48.6559444293833/8.21836603806188	DE	Sat Oct 03 2020	Oct	2020	Oct-2020	paper	tissue
8905691	paper, tissue	48.6559444293833/8.21836603806188	DE	Sat Oct 03 2020	Oct	2020	Oct-2020	paper	tissue
8905690	glass, shard	48.6560503766394/8.21913910099139	DE	Sat Oct 03 2020	Oct	2020	Oct-2020	glass	shard
8905689	plastic	48.6545650614879/8.22123005055657	DE	Sat Oct 03 2020	Oct	2020	Oct-2020	plastic
8905210	facemask, mask, medicalfacemask	52.4171909429944/13.3114871534006	DE	Sun Oct 04 2020	Oct	2020	Oct-2020	facemask	mask	medicalfacemask
8905176	plastic, bottlecap	52.4180300777724/13.310989020748	DE	Sun Oct 04 2020	Oct	2020	Oct-2020	plastic	bottlecap
8905113	plastic, paper	52.4171056224535/13.3089567343959	DE	Sun Oct 04 2020	Oct	2020	Oct-2020	plastic	paper
8905106	metal, kronkorken	52.4171372269429/13.3081534508977	DE	Sun Oct 04 2020	Oct	2020	Oct-2020	metal	kronkorken
8875601	cigarette, butt	49.3122376/8.4503721	DE	Sat Oct 03 2020	Oct	2020	Oct-2020	cigarette	butt
8875600	plastic, lid	49.3122376/8.4503721	DE	Sat Oct 03 2020	Oct	2020	Oct-2020	plastic	lid
8855541	candy, wrapper, candywrapper	49.8555910282284/6.44508828313397	DE	Sat Oct 03 2020	Oct	2020	Oct-2020	candy	wrapper	candywrapper
8855537	cigarettepack	49.8589498423772/6.44322494975114	DE	Sat Oct 03 2020	Oct	2020	Oct-2020	cigarettepack
8855535	cigarette, cigarettepack, paper	49.8588153583795/6.44342307057808	DE	Sat Oct 03 2020	Oct	2020	Oct-2020	cigarette	cigarettepack	paper
8855532	cigarettepack	49.8564547894235/6.44454522548407	DE	Sat Oct 03 2020	Oct	2020	Oct-2020	cigarettepack
8855531	plastic	49.8585441085443/6.44384415640406	DE	Sat Oct 03 2020	Oct	2020	Oct-2020	plastic
8855529	plastic, wrapper	49.8583990988505/6.4438436013262	DE	Sat Oct 03 2020	Oct	2020	Oct-2020	plastic	wrapper
8850280	bottlecap, aluminium	49.6359986104679/8.33467078208361	DE	Sat Oct 03 2020	Oct	2020	Oct-2020	bottlecap	aluminium
8846117	candy, wrapper	49.636167385325/8.33388345286203	DE	Sat Oct 03 2020	Oct	2020	Oct-2020	candy	wrapper
8846108	candy, wrapper	49.636156650775/8.33374428041673	DE	Sat Oct 03 2020	Oct	2020	Oct-2020	candy	wrapper
8846102	wrapper	49.636150644808/8.3336869132817	DE	Sat Oct 03 2020	Oct	2020	Oct-2020	wrapper
8846101	candywrapper	49.636006085827/8.33379291850034	DE	Sat Oct 03 2020	Oct	2020	Oct-2020	candywrapper
8845234	bottle, glass	49.6365392728928/8.32843388436308	DE	Sat Oct 03 2020	Oct	2020	Oct-2020	bottle	glass
8845195	candywrapper	49.6364867169295/8.32836250663837	DE	Sat Oct 03 2020	Oct	2020	Oct-2020	candywrapper
8844709	candy, wrapper	49.6367360480946/8.32735501672517	DE	Sat Oct 03 2020	Oct	2020	Oct-2020	candy	wrapper
8843448	candy, carton	53.604466865969/9.82542388905346	DE	Sat Oct 03 2020	Oct	2020	Oct-2020	candy	carton
8843447	paper	53.6044827590803/9.82541313259324	DE	Sat Oct 03 2020	Oct	2020	Oct-2020	paper
8843446	plastic	53.6046647663369/9.82546083684771	DE	Sat Oct 03 2020	Oct	2020	Oct-2020	plastic
8843445	plastic	53.6044825001942/9.82541668524894	DE	Sat Oct 03 2020	Oct	2020	Oct-2020	plastic
8843444	plastic	53.6047188843623/9.82546393906684	DE	Sat Oct 03 2020	Oct	2020	Oct-2020	plastic
8843442	face mask	53.6063082440263/9.8263098565485	DE	Sat Oct 03 2020	Oct	2020	Oct-2020	face mask
8843440	spraycan	53.6070564459232/9.82615485365327	DE	Sat Oct 03 2020	Oct	2020	Oct-2020	spraycan
8843439	paper	53.6078373874039/9.82665440077158	DE	Sat Oct 03 2020	Oct	2020	Oct-2020	paper
8843438	paper	53.6080984810158/9.82990478854463	DE	Sat Oct 03 2020	Oct	2020	Oct-2020	paper
8843437	plastic	53.6079944624972/9.82741992175835	DE	Sat Oct 03 2020	Oct	2020	Oct-2020	plastic
8843435	papercup	53.6081839683629/9.83135040156511	DE	Sat Oct 03 2020	Oct	2020	Oct-2020	papercup
8843434	plastic, wrapper	53.6081713577978/9.83114116235573	DE	Sat Oct 03 2020	Oct	2020	Oct-2020	plastic	wrapper
8843433	plastic	53.6082099554433/9.83188356029854	DE	Sat Oct 03 2020	Oct	2020	Oct-2020	plastic
8843432	paper	53.6082261727632/9.8316701719402	DE	Sat Oct 03 2020	Oct	2020	Oct-2020	paper
8843431	plastic	53.6082730088152/9.83219603726309	DE	Sat Oct 03 2020	Oct	2020	Oct-2020	plastic
8843429	plastic	53.6082935503522/9.8330452596496	DE	Sat Oct 03 2020	Oct	2020	Oct-2020	plastic
8843427	plastic	53.6083850149878/9.83333721130828	DE	Sat Oct 03 2020	Oct	2020	Oct-2020	plastic
8843425	plastic	53.608560361569/9.83393751914902	DE	Sat Oct 03 2020	Oct	2020	Oct-2020	plastic
8843423	paper	53.6085619630058/9.83375580483402	DE	Sat Oct 03 2020	Oct	2020	Oct-2020	paper
8843422	plastic	53.60880042418/9.83382190460291	DE	Sat Oct 03 2020	Oct	2020	Oct-2020	plastic
8843421	plastic	53.6090382529828/9.83357429891355	DE	Sat Oct 03 2020	Oct	2020	Oct-2020	plastic
8843420	aluminumfoil	53.609153273225/9.83354258236183	DE	Sat Oct 03 2020	Oct	2020	Oct-2020	aluminumfoil
8843419	carton	53.6091326532942/9.83358850913124	DE	Sat Oct 03 2020	Oct	2020	Oct-2020	carton
8843418	paper	53.6090846057929/9.833555792846	DE	Sat Oct 03 2020	Oct	2020	Oct-2020	paper
8843417	plastic	53.6091808655637/9.83361953406285	DE	Sat Oct 03 2020	Oct	2020	Oct-2020	plastic
8843416	plastic	53.6102020301155/9.83340766473071	DE	Sat Oct 03 2020	Oct	2020	Oct-2020	plastic
8843415	plastic	53.6098317534439/9.83341626342667	DE	Sat Oct 03 2020	Oct	2020	Oct-2020	plastic
8843413	candy, wrapper	53.6105492841766/9.83303325709865	DE	Sat Oct 03 2020	Oct	2020	Oct-2020	candy	wrapper
8843412	plastic	53.6103302659809/9.83325223036016	DE	Sat Oct 03 2020	Oct	2020	Oct-2020	plastic
8843411	paper	53.609366405619/9.83356663454798	DE	Sat Oct 03 2020	Oct	2020	Oct-2020	paper
8843410	paper	53.6087915357834/9.83407495889157	DE	Sat Oct 03 2020	Oct	2020	Oct-2020	paper
8843409	plastic	53.6092840788665/9.83348079973472	DE	Sat Oct 03 2020	Oct	2020	Oct-2020	plastic
8843408	paper	53.6099807233921/9.83339080634186	DE	Sat Oct 03 2020	Oct	2020	Oct-2020	paper
8843407	aluminum	53.609772798055/9.8334914698982	DE	Sat Oct 03 2020	Oct	2020	Oct-2020	aluminum
8843406	plastic	53.6108976035193/9.83263616727531	DE	Sat Oct 03 2020	Oct	2020	Oct-2020	plastic
8843405	plastic	53.6098645295407/9.83344928238462	DE	Sat Oct 03 2020	Oct	2020	Oct-2020	plastic
8843404	bottlecap	53.6098645295407/9.83344928238462	DE	Sat Oct 03 2020	Oct	2020	Oct-2020	bottlecap
8843402	cigarette, butt	53.6099931631414/9.83341140049524	DE	Sat Oct 03 2020	Oct	2020	Oct-2020	cigarette	butt
8843401	plastic	53.610001156257/9.83340027040883	DE	Sat Oct 03 2020	Oct	2020	Oct-2020	plastic
8843400	cigarette	53.609973752039/9.83341625926751	DE	Sat Oct 03 2020	Oct	2020	Oct-2020	cigarette
8843399	cigarette, plastic	53.609881086591/9.83337835897542	DE	Sat Oct 03 2020	Oct	2020	Oct-2020	cigarette	plastic
8843398	paper	53.6104309415977/9.83312582281913	DE	Sat Oct 03 2020	Oct	2020	Oct-2020	paper
8843359	paper	53.6104925213487/9.83308754500645	DE	Sat Oct 03 2020	Oct	2020	Oct-2020	paper
8843358	paper	53.6121062324449/9.83145630493166	DE	Sat Oct 03 2020	Oct	2020	Oct-2020	paper
8840150	paper	53.6136105375214/9.83048604988046	DE	Sat Oct 03 2020	Oct	2020	Oct-2020	paper
8840149	paper	53.6137643847055/9.8280686667592	DE	Sat Oct 03 2020	Oct	2020	Oct-2020	paper
8840148	papercup	53.6137358446585/9.82736650254266	DE	Sat Oct 03 2020	Oct	2020	Oct-2020	papercup
8840147	paper	53.613707188682/9.82751959717536	DE	Sat Oct 03 2020	Oct	2020	Oct-2020	paper
8840146	paper	53.6137310938647/9.82773795144656	DE	Sat Oct 03 2020	Oct	2020	Oct-2020	paper
8840145	plastic	53.6137407009554/9.82728919723443	DE	Sat Oct 03 2020	Oct	2020	Oct-2020	plastic
8840144	plastic	53.6137380221315/9.82732027891286	DE	Sat Oct 03 2020	Oct	2020	Oct-2020	plastic
8840143	face mask	53.6136916767957/9.82723581920734	DE	Sat Oct 03 2020	Oct	2020	Oct-2020	face mask
8840142	face mask	53.6136846587996/9.82720193216431	DE	Sat Oct 03 2020	Oct	2020	Oct-2020	face mask
8840141	aluminumfoil	53.6136904805383/9.82715908694028	DE	Sat Oct 03 2020	Oct	2020	Oct-2020	aluminumfoil
8840139	plastic	53.613697840185/9.826473068041	DE	Sat Oct 03 2020	Oct	2020	Oct-2020	plastic
8840138	aluminumfoil	53.6137273216905/9.82712977714189	DE	Sat Oct 03 2020	Oct	2020	Oct-2020	aluminumfoil
8840137	plastic	53.6137067926635/9.82702005340556	DE	Sat Oct 03 2020	Oct	2020	Oct-2020	plastic
8840136	glass, bottle	53.6137109531376/9.82653453705147	DE	Sat Oct 03 2020	Oct	2020	Oct-2020	glass	bottle
8840135	cigarettepack	53.6136848639155/9.82627176349538	DE	Sat Oct 03 2020	Oct	2020	Oct-2020	cigarettepack
8840134	plastic	53.6136922008114/9.82635320295536	DE	Sat Oct 03 2020	Oct	2020	Oct-2020	plastic
8840133	plastic	53.6136926843235/9.82642388964596	DE	Sat Oct 03 2020	Oct	2020	Oct-2020	plastic
8840132	cigarettepack	53.6136825347246/9.82626930311502	DE	Sat Oct 03 2020	Oct	2020	Oct-2020	cigarettepack
8840131	plastic	53.6136273548246/9.82552092093407	DE	Sat Oct 03 2020	Oct	2020	Oct-2020	plastic
8840130	plastic	53.6136379805885/9.82567680133703	DE	Sat Oct 03 2020	Oct	2020	Oct-2020	plastic
8840129	paper, cup	53.6136389127108/9.8255772643113	DE	Sat Oct 03 2020	Oct	2020	Oct-2020	paper	cup
8840128	cigarette	53.6136929078604/9.82626630988199	DE	Sat Oct 03 2020	Oct	2020	Oct-2020	cigarette
8840127	plastic	53.6136336837023/9.82552163749388	DE	Sat Oct 03 2020	Oct	2020	Oct-2020	plastic
8840126	plastic	53.613587143552/9.82509231650277	DE	Sat Oct 03 2020	Oct	2020	Oct-2020	plastic
8840125	plastic	53.6136210078254/9.8255201358796	DE	Sat Oct 03 2020	Oct	2020	Oct-2020	plastic
8840124	paper	53.6136320088672/9.82551941930251	DE	Sat Oct 03 2020	Oct	2020	Oct-2020	paper
8840123	styropor	53.6136505847691/9.82541958467162	DE	Sat Oct 03 2020	Oct	2020	Oct-2020	styropor
8840122	plastic	53.6136256721921/9.82546924745444	DE	Sat Oct 03 2020	Oct	2020	Oct-2020	plastic
8840121	plastic	53.6136120273813/9.82544988211467	DE	Sat Oct 03 2020	Oct	2020	Oct-2020	plastic
8840119	plastic	53.613587143552/9.82509231650277	DE	Sat Oct 03 2020	Oct	2020	Oct-2020	plastic
8840118	paper	53.6135794293163/9.82516750659369	DE	Sat Oct 03 2020	Oct	2020	Oct-2020	paper
8840117	plastic	53.6135950984926/9.82491449347787	DE	Sat Oct 03 2020	Oct	2020	Oct-2020	plastic
8840116	plastic	53.613587143552/9.82509231650277	DE	Sat Oct 03 2020	Oct	2020	Oct-2020	plastic
8840115	glass bottle	53.613570130892/9.82487555526076	DE	Sat Oct 03 2020	Oct	2020	Oct-2020	glass bottle
8840111	glove	53.6135839880062/9.82502623549166	DE	Sat Oct 03 2020	Oct	2020	Oct-2020	glove
8840110	plastic	53.613508287818/9.82421076892729	DE	Sat Oct 03 2020	Oct	2020	Oct-2020	plastic
8840109	plastic	53.613593793741/9.82481857713419	DE	Sat Oct 03 2020	Oct	2020	Oct-2020	plastic
8840108	plastic	53.613577812284/9.82482552534916	DE	Sat Oct 03 2020	Oct	2020	Oct-2020	plastic
8840107	glass, bottle	53.6135872629599/9.82473722606704	DE	Sat Oct 03 2020	Oct	2020	Oct-2020	glass	bottle
8840106	plastic, wrapper	53.6135886932167/9.82482173847996	DE	Sat Oct 03 2020	Oct	2020	Oct-2020	plastic	wrapper
8840105	plastic	53.6135920331678/9.82478028953541	DE	Sat Oct 03 2020	Oct	2020	Oct-2020	plastic
8840100	cigarettepack	53.6135587020161/9.82463067379195	DE	Sat Oct 03 2020	Oct	2020	Oct-2020	cigarettepack
8840099	cigarette, butt	53.6135685637322/9.82470758407431	DE	Sat Oct 03 2020	Oct	2020	Oct-2020	cigarette	butt
8840098	candywrapper	53.6135870003566/9.82464729983643	DE	Sat Oct 03 2020	Oct	2020	Oct-2020	candywrapper
8840092	plastic	53.613555587456/9.82442177305746	DE	Sat Oct 03 2020	Oct	2020	Oct-2020	plastic
8840090	plastic, wrapper	53.6135411660032/9.82453850879255	DE	Sat Oct 03 2020	Oct	2020	Oct-2020	plastic	wrapper
8840089	plastic	53.613531182307/9.82434370454849	DE	Sat Oct 03 2020	Oct	2020	Oct-2020	plastic
8840088	glass, bottle	53.6135559235296/9.8239616306284	DE	Sat Oct 03 2020	Oct	2020	Oct-2020	glass	bottle
8840087	paper	53.6135209347428/9.82401456559336	DE	Sat Oct 03 2020	Oct	2020	Oct-2020	paper
8840086	plastic	53.6135068413316/9.82396298947969	DE	Sat Oct 03 2020	Oct	2020	Oct-2020	plastic
8840085	glass, bottle	53.6135270321147/9.82399527588706	DE	Sat Oct 03 2020	Oct	2020	Oct-2020	glass	bottle
8840084	plastic	53.6135164477746/9.82396657542153	DE	Sat Oct 03 2020	Oct	2020	Oct-2020	plastic
8840083	paper	53.6135098338969/9.8235992472335	DE	Sat Oct 03 2020	Oct	2020	Oct-2020	paper
8840082	paper	53.6135022298812/9.82393417819245	DE	Sat Oct 03 2020	Oct	2020	Oct-2020	paper
8840081	plastic	53.6135098338969/9.8235992472335	DE	Sat Oct 03 2020	Oct	2020	Oct-2020	plastic
8840080	plastic	53.6134940267751/9.82382612702271	DE	Sat Oct 03 2020	Oct	2020	Oct-2020	plastic
8840079	cigarette	53.6135100534332/9.82347329197455	DE	Sat Oct 03 2020	Oct	2020	Oct-2020	cigarette
8840078	plastic	53.6135284167814/9.82349098740858	DE	Sat Oct 03 2020	Oct	2020	Oct-2020	plastic
8840077	paper	53.6134748797666/9.82355136976071	DE	Sat Oct 03 2020	Oct	2020	Oct-2020	paper
8840076	plastic	53.6135030757308/9.82351921338854	DE	Sat Oct 03 2020	Oct	2020	Oct-2020	plastic
8840075	plastic	53.6135154879707/9.82354122184969	DE	Sat Oct 03 2020	Oct	2020	Oct-2020	plastic
8840074	plastic	53.6135484355874/9.8235354455003	DE	Sat Oct 03 2020	Oct	2020	Oct-2020	plastic
8840073	plastic	53.613562992175/9.82352007146921	DE	Sat Oct 03 2020	Oct	2020	Oct-2020	plastic
8840072	plastic	53.6135582006655/9.82350348191437	DE	Sat Oct 03 2020	Oct	2020	Oct-2020	plastic
8840070	paper	53.6135774350589/9.8234479968742	DE	Sat Oct 03 2020	Oct	2020	Oct-2020	paper
8840069	face mask	53.6135374730255/9.8234987401951	DE	Sat Oct 03 2020	Oct	2020	Oct-2020	face mask
8840068	plastic	53.6135524925462/9.8234897448787	DE	Sat Oct 03 2020	Oct	2020	Oct-2020	plastic
8840067	cigarette	53.6135773867763/9.82344981732566	DE	Sat Oct 03 2020	Oct	2020	Oct-2020	cigarette
8840066	paper	53.6135858291364/9.82341224679115	DE	Sat Oct 03 2020	Oct	2020	Oct-2020	paper
8840065	paper	53.6136261588905/9.82336490991999	DE	Sat Oct 03 2020	Oct	2020	Oct-2020	paper
8840064	plastic	53.6136640507605/9.82334603188071	DE	Sat Oct 03 2020	Oct	2020	Oct-2020	plastic
8840063	paper	53.6136448969946/9.82340486578401	DE	Sat Oct 03 2020	Oct	2020	Oct-2020	paper
8840062	paper	53.6136079650227/9.82343690837313	DE	Sat Oct 03 2020	Oct	2020	Oct-2020	paper
8840061	paper	53.6136448969946/9.82340486578401	DE	Sat Oct 03 2020	Oct	2020	Oct-2020	paper
8840060	paper	53.6136406275937/9.82338076111951	DE	Sat Oct 03 2020	Oct	2020	Oct-2020	paper
8840059	paper	53.6136488514505/9.82337472136343	DE	Sat Oct 03 2020	Oct	2020	Oct-2020	paper
8840058	plastic	53.6136448969946/9.82340486578401	DE	Sat Oct 03 2020	Oct	2020	Oct-2020	plastic
8840057	plastic	53.6136408691484/9.82336261600483	DE	Sat Oct 03 2020	Oct	2020	Oct-2020	plastic
8840056	plastic	53.6136443375812/9.82336549515597	DE	Sat Oct 03 2020	Oct	2020	Oct-2020	plastic
8840055	paper	53.6136447753118/9.82336647509998	DE	Sat Oct 03 2020	Oct	2020	Oct-2020	paper
8840054	paper	53.6136447753118/9.82336647509998	DE	Sat Oct 03 2020	Oct	2020	Oct-2020	paper
8840053	plastic	53.6136619869143/9.8233636466382	DE	Sat Oct 03 2020	Oct	2020	Oct-2020	plastic
8840052	paper	53.6136523136251/9.82336573944074	DE	Sat Oct 03 2020	Oct	2020	Oct-2020	paper
8840051	paper	53.6137013384809/9.82333423122638	DE	Sat Oct 03 2020	Oct	2020	Oct-2020	paper
8840050	paper	53.6136847056951/9.82332338355677	DE	Sat Oct 03 2020	Oct	2020	Oct-2020	paper
8840049	paper	53.6136617160596/9.82334673153993	DE	Sat Oct 03 2020	Oct	2020	Oct-2020	paper
8840048	plastic	53.613719197224/9.82330920314158	DE	Sat Oct 03 2020	Oct	2020	Oct-2020	plastic
8840047	paper	53.6137332235858/9.82332162002756	DE	Sat Oct 03 2020	Oct	2020	Oct-2020	paper
8840046	plastic, wrapper	53.6137294833219/9.82326750326539	DE	Sat Oct 03 2020	Oct	2020	Oct-2020	plastic	wrapper
8840045	glass, bottle	53.6137279291515/9.82328266506227	DE	Sat Oct 03 2020	Oct	2020	Oct-2020	glass	bottle
8840044	glass, bottle	53.613732323036/9.82327579797026	DE	Sat Oct 03 2020	Oct	2020	Oct-2020	glass	bottle
8840042	plastic, candy, wrapper	53.6137523394349/9.82324583770211	DE	Sat Oct 03 2020	Oct	2020	Oct-2020	plastic	candy	wrapper
8840041	plastic	53.6137353369285/9.82326531108567	DE	Sat Oct 03 2020	Oct	2020	Oct-2020	plastic
8840040	paper	53.6137534207221/9.82326477799024	DE	Sat Oct 03 2020	Oct	2020	Oct-2020	paper
8840039	plastic	53.6138047484573/9.82325193761387	DE	Sat Oct 03 2020	Oct	2020	Oct-2020	plastic
8840038	plastic	53.6138420519992/9.82315970402886	DE	Sat Oct 03 2020	Oct	2020	Oct-2020	plastic
8840037	paper	53.6138122675428/9.82325799921881	DE	Sat Oct 03 2020	Oct	2020	Oct-2020	paper
8840036	plastic	53.6138331107229/9.82319562248607	DE	Sat Oct 03 2020	Oct	2020	Oct-2020	plastic
8840035	plastic	53.6138409566684/9.82316537408115	DE	Sat Oct 03 2020	Oct	2020	Oct-2020	plastic
8840034	paper	53.6138346132634/9.82316836189949	DE	Sat Oct 03 2020	Oct	2020	Oct-2020	paper
8840033	plastic	53.6138334803591/9.82317938242686	DE	Sat Oct 03 2020	Oct	2020	Oct-2020	plastic
8840032	plastic	53.6138587368013/9.82312673005276	DE	Sat Oct 03 2020	Oct	2020	Oct-2020	plastic
8840031	plastic	53.6139402797549/9.8230044489043	DE	Sat Oct 03 2020	Oct	2020	Oct-2020	plastic
8840030	paper	53.6138587362438/9.82308458487557	DE	Sat Oct 03 2020	Oct	2020	Oct-2020	paper
8840029	cigarette butts	53.6140157638399/9.82282208422092	DE	Sat Oct 03 2020	Oct	2020	Oct-2020	cigarette butts
8840028	cigarette, butt	53.6140134962095/9.82284518687342	DE	Sat Oct 03 2020	Oct	2020	Oct-2020	cigarette	butt
8840027	plastic	53.6139706707468/9.8229648946782	DE	Sat Oct 03 2020	Oct	2020	Oct-2020	plastic
8840026	cigarette	53.6140105617772/9.82285503542608	DE	Sat Oct 03 2020	Oct	2020	Oct-2020	cigarette
8840024	cigarette, butt	53.6140105617772/9.82285503542608	DE	Sat Oct 03 2020	Oct	2020	Oct-2020	cigarette	butt
8840023	plastic	53.6140465918371/9.82285969046332	DE	Sat Oct 03 2020	Oct	2020	Oct-2020	plastic
8840022	cigarette, butt	53.6140105617772/9.82285503542608	DE	Sat Oct 03 2020	Oct	2020	Oct-2020	cigarette	butt
8840021	cigarette	53.6140105617772/9.82285503542608	DE	Sat Oct 03 2020	Oct	2020	Oct-2020	cigarette
8840020	plastic	53.6140059553544/9.82289963434282	DE	Sat Oct 03 2020	Oct	2020	Oct-2020	plastic
8840019	cigarette	53.6140071724365/9.82290482346514	DE	Sat Oct 03 2020	Oct	2020	Oct-2020	cigarette
8840018	paper, plastic, wrapper	53.6140931174559/9.82284581808387	DE	Sat Oct 03 2020	Oct	2020	Oct-2020	paper	plastic	wrapper
8840017	plastic	53.6142104740981/9.82264884843006	DE	Sat Oct 03 2020	Oct	2020	Oct-2020	plastic
8840016	paper	53.6144366045514/9.82224617858138	DE	Sat Oct 03 2020	Oct	2020	Oct-2020	paper
8840015	plastic	53.6143675173372/9.8223168124705	DE	Sat Oct 03 2020	Oct	2020	Oct-2020	plastic
8840014	cigarettepack	53.614334196164/9.82249944515882	DE	Sat Oct 03 2020	Oct	2020	Oct-2020	cigarettepack
8840013	plastic	53.61446278242/9.82225964006801	DE	Sat Oct 03 2020	Oct	2020	Oct-2020	plastic
8840012	metal	53.6144076903327/9.8223390703718	DE	Sat Oct 03 2020	Oct	2020	Oct-2020	metal
8840011	plastic	53.614448808865/9.8222262299871	DE	Sat Oct 03 2020	Oct	2020	Oct-2020	plastic
8840010	plastic	53.6156831249176/9.81767343959781	DE	Sat Oct 03 2020	Oct	2020	Oct-2020	plastic
8840009	plastic	53.6156370727877/9.81755534562607	DE	Sat Oct 03 2020	Oct	2020	Oct-2020	plastic
8840008	paper	53.6146206238543/9.82199558161749	DE	Sat Oct 03 2020	Oct	2020	Oct-2020	paper
8840007	paper	53.6156237063497/9.81741873926143	DE	Sat Oct 03 2020	Oct	2020	Oct-2020	paper
8840006	plastic, wrapper	53.6156626111865/9.8174374843728	DE	Sat Oct 03 2020	Oct	2020	Oct-2020	plastic	wrapper
8840005	plastic	53.6156334880507/9.81749349969329	DE	Sat Oct 03 2020	Oct	2020	Oct-2020	plastic
8840004	paper	53.6156817708033/9.81751285663606	DE	Sat Oct 03 2020	Oct	2020	Oct-2020	paper
8840002	paper	53.6127556151052/9.81590135735057	DE	Sat Oct 03 2020	Oct	2020	Oct-2020	paper
8840001	plastic	53.6128670320163/9.81595225297495	DE	Sat Oct 03 2020	Oct	2020	Oct-2020	plastic
8840000	plastic	53.6158219998772/9.81765811617542	DE	Sat Oct 03 2020	Oct	2020	Oct-2020	plastic
8839999	paper	53.612716387033/9.81584616662673	DE	Sat Oct 03 2020	Oct	2020	Oct-2020	paper
8839998	plastic	53.611564224398/9.81483749881992	DE	Sat Oct 03 2020	Oct	2020	Oct-2020	plastic
8839997	paper	53.6126265201954/9.8158027274219	DE	Sat Oct 03 2020	Oct	2020	Oct-2020	paper
8839996	plastic	53.6117005946396/9.81495168051313	DE	Sat Oct 03 2020	Oct	2020	Oct-2020	plastic
8839995	paper	53.6126265201954/9.8158027274219	DE	Sat Oct 03 2020	Oct	2020	Oct-2020	paper
8839991	plastic	53.6118786008019/9.81491240999794	DE	Sat Oct 03 2020	Oct	2020	Oct-2020	plastic
8839990	plastic	53.6126265370631/9.81580296123438	DE	Sat Oct 03 2020	Oct	2020	Oct-2020	plastic
8839987	cigarettebox	53.6126557809313/9.81581125872379	DE	Sat Oct 03 2020	Oct	2020	Oct-2020	cigarettebox
8839985	cigarettebox	53.6126597412172/9.81579872253234	DE	Sat Oct 03 2020	Oct	2020	Oct-2020	cigarettebox
8839976	aluminumfoil	53.6126451984539/9.81575387355507	DE	Sat Oct 03 2020	Oct	2020	Oct-2020	aluminumfoil
8839975	cigarettepack	53.6126597412172/9.81579872253234	DE	Sat Oct 03 2020	Oct	2020	Oct-2020	cigarettepack
8839972	plastic	53.6123939493685/9.81548960436791	DE	Sat Oct 03 2020	Oct	2020	Oct-2020	plastic
8839971	plastic	53.6125898613412/9.81567122860134	DE	Sat Oct 03 2020	Oct	2020	Oct-2020	plastic
8839969	plastic	53.6124106565613/9.81543574988336	DE	Sat Oct 03 2020	Oct	2020	Oct-2020	plastic
8839968	paper	53.6125102833615/9.81590516136955	DE	Sat Oct 03 2020	Oct	2020	Oct-2020	paper
8839967	plastic	53.6118786008019/9.81491240999794	DE	Sat Oct 03 2020	Oct	2020	Oct-2020	plastic
8839966	paper	53.611564224398/9.81483749881992	DE	Sat Oct 03 2020	Oct	2020	Oct-2020	paper
8839965	bottle, plastic	53.6121068270871/9.81514030382849	DE	Sat Oct 03 2020	Oct	2020	Oct-2020	bottle	plastic
8839964	cigarettepack	53.6120014446871/9.81502609785857	DE	Sat Oct 03 2020	Oct	2020	Oct-2020	cigarettepack
8837394	glass, shard	48.8088453049295/8.18131308072077	DE	Sat Oct 03 2020	Oct	2020	Oct-2020	glass	shard
8837393	butt, celluloseacetate, cigarette, microfibre, plastic, marlboro	48.8088369230263/8.18126731552946	DE	Sat Oct 03 2020	Oct	2020	Oct-2020	butt	celluloseacetate	cigarette	microfibre	plastic	marlboro
8837392	paper, boardingticket, ferry, scandlines, pleasegotolane13	48.8088608114503/8.18125843071209	DE	Sat Oct 03 2020	Oct	2020	Oct-2020	paper	boardingticket	ferry	scandlines	pleasegotolane13
8837364	plastic, wrapper, knoppers	48.8087963965245/8.18128994666802	DE	Sat Oct 03 2020	Oct	2020	Oct-2020	plastic	wrapper	knoppers
8836933	plastikkabel	49.1096909/8.4699703	DE	Sat Oct 03 2020	Oct	2020	Oct-2020	plastikkabel
8836093	stoff	49.1106456/8.4700484	DE	Sat Oct 03 2020	Oct	2020	Oct-2020	stoff
8836092	stoff	49.1105258/8.4699843	DE	Sat Oct 03 2020	Oct	2020	Oct-2020	stoff
8836091	bonbonverpackung	49.1105523/8.4699823	DE	Sat Oct 03 2020	Oct	2020	Oct-2020	bonbonverpackung
8836090	paper, verpackung	49.1097661/8.469562	DE	Sat Oct 03 2020	Oct	2020	Oct-2020	paper	verpackung
8836089	plastic	49.1106159/8.4699965	DE	Sat Oct 03 2020	Oct	2020	Oct-2020	plastic
8836088	paper, burger king food wraper	49.1106864/8.47007	DE	Sat Oct 03 2020	Oct	2020	Oct-2020	paper	burger king food wraper
8836087	aluminumfoil	49.110726/8.4700576	DE	Sat Oct 03 2020	Oct	2020	Oct-2020	aluminumfoil
8836086	aluminumfoil	49.1107259/8.4700694	DE	Sat Oct 03 2020	Oct	2020	Oct-2020	aluminumfoil
8836085	plastic	49.1107901/8.4700694	DE	Sat Oct 03 2020	Oct	2020	Oct-2020	plastic
8836084	plastic	49.1108856/8.4701722	DE	Sat Oct 03 2020	Oct	2020	Oct-2020	plastic
8836083	kassenzettel	49.1107864/8.470081	DE	Sat Oct 03 2020	Oct	2020	Oct-2020	kassenzettel
8836082	plastic	49.1108668/8.4701506	DE	Sat Oct 03 2020	Oct	2020	Oct-2020	plastic
8836081	plastic	49.1107983/8.470088	DE	Sat Oct 03 2020	Oct	2020	Oct-2020	plastic
8836080	paper	49.110829/8.470134	DE	Sat Oct 03 2020	Oct	2020	Oct-2020	paper
8836079	plastic	49.1107732/8.4700712	DE	Sat Oct 03 2020	Oct	2020	Oct-2020	plastic
8836078	kinderbueno	49.1107967/8.4700898	DE	Sat Oct 03 2020	Oct	2020	Oct-2020	kinderbueno
8836077	plastic	49.11078/8.4700835	DE	Sat Oct 03 2020	Oct	2020	Oct-2020	plastic
8836076	plastic	49.1108945/8.4701458	DE	Sat Oct 03 2020	Oct	2020	Oct-2020	plastic
8836075	plastic, kabelbinder	49.1108409/8.4701369	DE	Sat Oct 03 2020	Oct	2020	Oct-2020	plastic	kabelbinder
8836074	corny, riegel	49.1109342/8.4701395	DE	Sat Oct 03 2020	Oct	2020	Oct-2020	corny	riegel
8836073	plastic	49.1109082/8.4701562	DE	Sat Oct 03 2020	Oct	2020	Oct-2020	plastic
8836072	plastic	49.1107443/8.4700865	DE	Sat Oct 03 2020	Oct	2020	Oct-2020	plastic
8836071	piece, plastic	49.1108509/8.470145	DE	Sat Oct 03 2020	Oct	2020	Oct-2020	piece	plastic
8836070	paper	49.1113899/8.4703641	DE	Sat Oct 03 2020	Oct	2020	Oct-2020	paper
8836069	plastic	49.111747/8.4707706	DE	Sat Oct 03 2020	Oct	2020	Oct-2020	plastic
8836068	plastic	49.1112117/8.4702544	DE	Sat Oct 03 2020	Oct	2020	Oct-2020	plastic
8836067	pizzakarton	49.1113524/8.4703882	DE	Sat Oct 03 2020	Oct	2020	Oct-2020	pizzakarton
8836066	b��ckertǬte, bag, paper	49.1112273/8.4702525	DE	Sat Oct 03 2020	Oct	2020	Oct-2020	b��ckertǬte	bag	paper
8836065	plastic	49.1113652/8.4703692	DE	Sat Oct 03 2020	Oct	2020	Oct-2020	plastic
8836064	plastic	49.1109687/8.4701364	DE	Sat Oct 03 2020	Oct	2020	Oct-2020	plastic
8836063	plastic	49.1109636/8.470132	DE	Sat Oct 03 2020	Oct	2020	Oct-2020	plastic
8836062	plastic	49.1113536/8.4703711	DE	Sat Oct 03 2020	Oct	2020	Oct-2020	plastic
8836061	piece, plastic	49.1109658/8.4701739	DE	Sat Oct 03 2020	Oct	2020	Oct-2020	piece	plastic
8836060	eisvepackung	49.1111685/8.4702458	DE	Sat Oct 03 2020	Oct	2020	Oct-2020	eisvepackung
8836059	candy, plastic	49.1114053/8.4703973	DE	Sat Oct 03 2020	Oct	2020	Oct-2020	candy	plastic
8836058	cornyriegel	49.110947/8.4701556	DE	Sat Oct 03 2020	Oct	2020	Oct-2020	cornyriegel
8836057	kassenzettel	49.1110831/8.4702224	DE	Sat Oct 03 2020	Oct	2020	Oct-2020	kassenzettel
8836056	paper	49.1114039/8.4703611	DE	Sat Oct 03 2020	Oct	2020	Oct-2020	paper
8836055	plastic	49.1121375/8.471068	DE	Sat Oct 03 2020	Oct	2020	Oct-2020	plastic
8836054	metall	49.1120747/8.4709437	DE	Sat Oct 03 2020	Oct	2020	Oct-2020	metall
8836053	cigarette	49.1122443/8.4709908	DE	Sat Oct 03 2020	Oct	2020	Oct-2020	cigarette
8836051	kassenzettel	49.111979/8.4709876	DE	Sat Oct 03 2020	Oct	2020	Oct-2020	kassenzettel
8836050	kabelbinder	49.1120738/8.4709542	DE	Sat Oct 03 2020	Oct	2020	Oct-2020	kabelbinder
8836049	plastic	49.1119933/8.4710186	DE	Sat Oct 03 2020	Oct	2020	Oct-2020	plastic
8836048	metall	49.1120668/8.4709207	DE	Sat Oct 03 2020	Oct	2020	Oct-2020	metall
8836047	plastic	49.1122566/8.470977	DE	Sat Oct 03 2020	Oct	2020	Oct-2020	plastic
8836046	cigarette	49.111975/8.4708745	DE	Sat Oct 03 2020	Oct	2020	Oct-2020	cigarette
8836045	bag	49.1119997/8.4709708	DE	Sat Oct 03 2020	Oct	2020	Oct-2020	bag
8836044	bottlecap	49.1119806/8.4708834	DE	Sat Oct 03 2020	Oct	2020	Oct-2020	bottlecap
8836043	plastic	49.1119545/8.4708485	DE	Sat Oct 03 2020	Oct	2020	Oct-2020	plastic
8836042	plastic	49.111978/8.4709996	DE	Sat Oct 03 2020	Oct	2020	Oct-2020	plastic
8836041	plastic	49.1119842/8.4710178	DE	Sat Oct 03 2020	Oct	2020	Oct-2020	plastic
8836039	plastic	49.1116715/8.470742	DE	Sat Oct 03 2020	Oct	2020	Oct-2020	plastic
8836038	��lflasche	49.1111514/8.4704598	DE	Sat Oct 03 2020	Oct	2020	Oct-2020	��lflasche
8836037	wurstverpackung	49.11139/8.4705761	DE	Sat Oct 03 2020	Oct	2020	Oct-2020	wurstverpackung
8836036	cigarette	49.1117541/8.4707678	DE	Sat Oct 03 2020	Oct	2020	Oct-2020	cigarette
8836035	plastic	49.1109286/8.4703605	DE	Sat Oct 03 2020	Oct	2020	Oct-2020	plastic
8836034	bottlecap	49.1109944/8.4704316	DE	Sat Oct 03 2020	Oct	2020	Oct-2020	bottlecap
8836033	plastic	49.1115592/8.4707166	DE	Sat Oct 03 2020	Oct	2020	Oct-2020	plastic
8836031	cigarette	49.1113594/8.4705648	DE	Sat Oct 03 2020	Oct	2020	Oct-2020	cigarette
8836030	plastic	49.1112218/8.4704929	DE	Sat Oct 03 2020	Oct	2020	Oct-2020	plastic
8836029	bag	49.1109007/8.4703342	DE	Sat Oct 03 2020	Oct	2020	Oct-2020	bag
8836028	bottlecap	49.1108466/8.470286	DE	Sat Oct 03 2020	Oct	2020	Oct-2020	bottlecap
8836027	plastic	49.1109335/8.4703301	DE	Sat Oct 03 2020	Oct	2020	Oct-2020	plastic
8836026	bottlecap	49.1108503/8.4702875	DE	Sat Oct 03 2020	Oct	2020	Oct-2020	bottlecap
8836025	aluminum	49.1108467/8.4702822	DE	Sat Oct 03 2020	Oct	2020	Oct-2020	aluminum
8836024	facemask	49.1107597/8.4702567	DE	Sat Oct 03 2020	Oct	2020	Oct-2020	facemask
8836023	bottlecap	49.1108406/8.470289	DE	Sat Oct 03 2020	Oct	2020	Oct-2020	bottlecap
8836022	paper	49.1108141/8.4702912	DE	Sat Oct 03 2020	Oct	2020	Oct-2020	paper
8836021	paper	49.1104642/8.4698503	DE	Sat Oct 03 2020	Oct	2020	Oct-2020	paper
8836020	plastic	49.1104664/8.4698438	DE	Sat Oct 03 2020	Oct	2020	Oct-2020	plastic
8836019	medikamentenverpackung	49.1104486/8.4698863	DE	Sat Oct 03 2020	Oct	2020	Oct-2020	medikamentenverpackung
8836018	plastic	49.1104566/8.4699009	DE	Sat Oct 03 2020	Oct	2020	Oct-2020	plastic
8836017	plastic	49.1104034/8.4698776	DE	Sat Oct 03 2020	Oct	2020	Oct-2020	plastic
8836016	glassbottle	49.1104102/8.4697853	DE	Sat Oct 03 2020	Oct	2020	Oct-2020	glassbottle
8836015	styropor	49.1104082/8.4698898	DE	Sat Oct 03 2020	Oct	2020	Oct-2020	styropor
8836014	aluminum	49.1104256/8.469779	DE	Sat Oct 03 2020	Oct	2020	Oct-2020	aluminum
8836013	aluminum	49.1104275/8.4697784	DE	Sat Oct 03 2020	Oct	2020	Oct-2020	aluminum
8836012	plastic	49.1103979/8.4698987	DE	Sat Oct 03 2020	Oct	2020	Oct-2020	plastic
8836011	bottlecap	49.1104243/8.4697836	DE	Sat Oct 03 2020	Oct	2020	Oct-2020	bottlecap
8836010	plastiknetz	49.1104091/8.4699067	DE	Sat Oct 03 2020	Oct	2020	Oct-2020	plastiknetz
8836009	bottlecap	49.1103924/8.46982	DE	Sat Oct 03 2020	Oct	2020	Oct-2020	bottlecap
8836007	bottlecap	49.1104164/8.469777	DE	Sat Oct 03 2020	Oct	2020	Oct-2020	bottlecap
8836006	aluminum, bottlecap	49.1104096/8.4698049	DE	Sat Oct 03 2020	Oct	2020	Oct-2020	aluminum	bottlecap
8836005	cigarette	49.1104124/8.4697785	DE	Sat Oct 03 2020	Oct	2020	Oct-2020	cigarette
8836004	bottlecap	49.1104095/8.4698006	DE	Sat Oct 03 2020	Oct	2020	Oct-2020	bottlecap
8836003	bottlecap	49.1104072/8.46978	DE	Sat Oct 03 2020	Oct	2020	Oct-2020	bottlecap
8836002	zigarettenschachtel	49.1104162/8.4698574	DE	Sat Oct 03 2020	Oct	2020	Oct-2020	zigarettenschachtel
8836001	plastic	49.1104382/8.4697663	DE	Sat Oct 03 2020	Oct	2020	Oct-2020	plastic
8836000	plastic	49.1104837/8.4697977	DE	Sat Oct 03 2020	Oct	2020	Oct-2020	plastic
8835999	strohhalm, plastic	49.1103959/8.4698192	DE	Sat Oct 03 2020	Oct	2020	Oct-2020	strohhalm	plastic
8835998	paper	49.11046/8.4697989	DE	Sat Oct 03 2020	Oct	2020	Oct-2020	paper
8835997	plastic	49.1104837/8.4697977	DE	Sat Oct 03 2020	Oct	2020	Oct-2020	plastic
8835996	plastic	49.1105926/8.4696668	DE	Sat Oct 03 2020	Oct	2020	Oct-2020	plastic
8835995	plastic	49.1105855/8.4696637	DE	Sat Oct 03 2020	Oct	2020	Oct-2020	plastic
8835994	plastic	49.1105744/8.4697126	DE	Sat Oct 03 2020	Oct	2020	Oct-2020	plastic
8835993	bag	49.11058/8.4695496	DE	Sat Oct 03 2020	Oct	2020	Oct-2020	bag
8835992	strohhalm, plastic	49.1105743/8.469711	DE	Sat Oct 03 2020	Oct	2020	Oct-2020	strohhalm	plastic
8835991	confetti	49.1105436/8.4697214	DE	Sat Oct 03 2020	Oct	2020	Oct-2020	confetti
8835990	plastic	49.1105388/8.4697131	DE	Sat Oct 03 2020	Oct	2020	Oct-2020	plastic
8835989	zigarette	49.1105736/8.4694826	DE	Sat Oct 03 2020	Oct	2020	Oct-2020	zigarette
8835988	plastic	49.1105399/8.4697175	DE	Sat Oct 03 2020	Oct	2020	Oct-2020	plastic
8835987	bottlecap	49.1105686/8.4697242	DE	Sat Oct 03 2020	Oct	2020	Oct-2020	bottlecap
8835986	plastic	49.1105548/8.4697099	DE	Sat Oct 03 2020	Oct	2020	Oct-2020	plastic
8835985	plastic	49.110567/8.4695485	DE	Sat Oct 03 2020	Oct	2020	Oct-2020	plastic
8835984	confetti	49.1105887/8.469723	DE	Sat Oct 03 2020	Oct	2020	Oct-2020	confetti
8835983	kassenzettel	49.1106024/8.4694986	DE	Sat Oct 03 2020	Oct	2020	Oct-2020	kassenzettel
8835982	plastic	49.1105962/8.4695628	DE	Sat Oct 03 2020	Oct	2020	Oct-2020	plastic
8835981	aluminum	49.1105538/8.4696429	DE	Sat Oct 03 2020	Oct	2020	Oct-2020	aluminum
8835980	plastic	49.1106103/8.4693841	DE	Sat Oct 03 2020	Oct	2020	Oct-2020	plastic
8835979	plastic	49.110522/8.4692533	DE	Sat Oct 03 2020	Oct	2020	Oct-2020	plastic
8835978	paper	49.1105414/8.4692627	DE	Sat Oct 03 2020	Oct	2020	Oct-2020	paper
8835977	plastic	49.1105395/8.4692569	DE	Sat Oct 03 2020	Oct	2020	Oct-2020	plastic
8835976	candywrapper	49.1105857/8.4692895	DE	Sat Oct 03 2020	Oct	2020	Oct-2020	candywrapper
8835975	bonbonwrapper	49.110533/8.4692195	DE	Sat Oct 03 2020	Oct	2020	Oct-2020	bonbonwrapper
8835974	plastic	49.11061/8.4693826	DE	Sat Oct 03 2020	Oct	2020	Oct-2020	plastic
8835973	plastic	49.1105266/8.4692326	DE	Sat Oct 03 2020	Oct	2020	Oct-2020	plastic
8835972	plastic	49.1105737/8.4692895	DE	Sat Oct 03 2020	Oct	2020	Oct-2020	plastic
8835971	tetrapak	49.1105383/8.4692531	DE	Sat Oct 03 2020	Oct	2020	Oct-2020	tetrapak
8835970	plastic	49.1105175/8.4692586	DE	Sat Oct 03 2020	Oct	2020	Oct-2020	plastic
8835969	plastiknetz	49.1105537/8.4692235	DE	Sat Oct 03 2020	Oct	2020	Oct-2020	plastiknetz
8835968	plastic	49.1105235/8.4692633	DE	Sat Oct 03 2020	Oct	2020	Oct-2020	plastic
8835966	paper	49.1105475/8.46922	DE	Sat Oct 03 2020	Oct	2020	Oct-2020	paper
8835965	candy, plastic	49.110477/8.4692052	DE	Sat Oct 03 2020	Oct	2020	Oct-2020	candy	plastic
8835964	plastic	49.1104262/8.4692077	DE	Sat Oct 03 2020	Oct	2020	Oct-2020	plastic
8835963	plastic, wrapper	49.1104236/8.4691837	DE	Sat Oct 03 2020	Oct	2020	Oct-2020	plastic	wrapper
8835962	plastic	49.1104766/8.469209	DE	Sat Oct 03 2020	Oct	2020	Oct-2020	plastic
8835961	plastiknetz	49.110425/8.4691962	DE	Sat Oct 03 2020	Oct	2020	Oct-2020	plastiknetz
8835960	piece, plastic	49.1104926/8.4692001	DE	Sat Oct 03 2020	Oct	2020	Oct-2020	piece	plastic
8835959	plastic	49.1104996/8.4691866	DE	Sat Oct 03 2020	Oct	2020	Oct-2020	plastic
8835958	bonbonwrapper	49.1104324/8.4691678	DE	Sat Oct 03 2020	Oct	2020	Oct-2020	bonbonwrapper
8835957	plastic	49.1104319/8.4691939	DE	Sat Oct 03 2020	Oct	2020	Oct-2020	plastic
8835956	plastic	49.1104324/8.4691678	DE	Sat Oct 03 2020	Oct	2020	Oct-2020	plastic
8835955	eisverpackung	49.1103889/8.4691605	DE	Sat Oct 03 2020	Oct	2020	Oct-2020	eisverpackung
8835954	cigarette	49.1104336/8.4691729	DE	Sat Oct 03 2020	Oct	2020	Oct-2020	cigarette
8835953	plastic	49.1104798/8.4692355	DE	Sat Oct 03 2020	Oct	2020	Oct-2020	plastic
8835952	plastic	49.1104324/8.4692054	DE	Sat Oct 03 2020	Oct	2020	Oct-2020	plastic
8835951	plastic	49.1104292/8.4692072	DE	Sat Oct 03 2020	Oct	2020	Oct-2020	plastic
8835950	plastic	49.1104832/8.4692245	DE	Sat Oct 03 2020	Oct	2020	Oct-2020	plastic
8835949	bag, chipsbag	49.110407/8.4691047	DE	Sat Oct 03 2020	Oct	2020	Oct-2020	bag	chipsbag
8835948	plastic	49.1103798/8.4691269	DE	Sat Oct 03 2020	Oct	2020	Oct-2020	plastic
8835947	plastic	49.1103795/8.4691271	DE	Sat Oct 03 2020	Oct	2020	Oct-2020	plastic
8835946	plastic	49.1103812/8.4691262	DE	Sat Oct 03 2020	Oct	2020	Oct-2020	plastic
8835945	plastic	49.1103694/8.4691004	DE	Sat Oct 03 2020	Oct	2020	Oct-2020	plastic
8835944	plastic	49.1103642/8.4690753	DE	Sat Oct 03 2020	Oct	2020	Oct-2020	plastic
8835943	facemask	49.1103805/8.4690645	DE	Sat Oct 03 2020	Oct	2020	Oct-2020	facemask
8835942	polystyrene	49.1103795/8.4691271	DE	Sat Oct 03 2020	Oct	2020	Oct-2020	polystyrene
8835941	paper	49.1103878/8.4691237	DE	Sat Oct 03 2020	Oct	2020	Oct-2020	paper
8835940	plastic	49.1103888/8.4690846	DE	Sat Oct 03 2020	Oct	2020	Oct-2020	plastic
8835939	plastic	49.1103554/8.4690378	DE	Sat Oct 03 2020	Oct	2020	Oct-2020	plastic
8835938	plastic	49.1103822/8.4690631	DE	Sat Oct 03 2020	Oct	2020	Oct-2020	plastic
8835937	plastic	49.1103772/8.4690751	DE	Sat Oct 03 2020	Oct	2020	Oct-2020	plastic
8835936	plastic	49.110386/8.4690529	DE	Sat Oct 03 2020	Oct	2020	Oct-2020	plastic
8835935	piece, plastic	49.1103645/8.4690763	DE	Sat Oct 03 2020	Oct	2020	Oct-2020	piece	plastic
8835934	plastic	49.1103862/8.4690616	DE	Sat Oct 03 2020	Oct	2020	Oct-2020	plastic
8835933	plastic	49.1103405/8.4690308	DE	Sat Oct 03 2020	Oct	2020	Oct-2020	plastic
8835932	zigarette	49.1102535/8.4689828	DE	Sat Oct 03 2020	Oct	2020	Oct-2020	zigarette
8835931	plastic	49.1103608/8.4690391	DE	Sat Oct 03 2020	Oct	2020	Oct-2020	plastic
8835930	wrapper	49.110343/8.4690363	DE	Sat Oct 03 2020	Oct	2020	Oct-2020	wrapper
8835929	plastic	49.110221/8.4690046	DE	Sat Oct 03 2020	Oct	2020	Oct-2020	plastic
8835928	plastic	49.1102679/8.4689926	DE	Sat Oct 03 2020	Oct	2020	Oct-2020	plastic
8835927	zigarette	49.1102513/8.468986	DE	Sat Oct 03 2020	Oct	2020	Oct-2020	zigarette
8835926	piece	49.1103066/8.4690222	DE	Sat Oct 03 2020	Oct	2020	Oct-2020	piece
8835925	plastic	49.1103108/8.4690206	DE	Sat Oct 03 2020	Oct	2020	Oct-2020	plastic
8835924	cigarettepack	49.1100206/8.4689518	DE	Sat Oct 03 2020	Oct	2020	Oct-2020	cigarettepack
8835922	gummihandschuh	49.1099819/8.4690719	DE	Sat Oct 03 2020	Oct	2020	Oct-2020	gummihandschuh
8835921	cigarette	49.1102725/8.4689932	DE	Sat Oct 03 2020	Oct	2020	Oct-2020	cigarette
8835920	plastic	49.1099874/8.4690805	DE	Sat Oct 03 2020	Oct	2020	Oct-2020	plastic
8835919	paper	49.1102091/8.4690256	DE	Sat Oct 03 2020	Oct	2020	Oct-2020	paper
8835918	piece, plastic	49.1098061/8.4694975	DE	Sat Oct 03 2020	Oct	2020	Oct-2020	piece	plastic
8835917	cigarette	49.1098143/8.4694958	DE	Sat Oct 03 2020	Oct	2020	Oct-2020	cigarette
8835916	confetti	49.109714/8.4695344	DE	Sat Oct 03 2020	Oct	2020	Oct-2020	confetti
8835915	paper	49.1096248/8.4695091	DE	Sat Oct 03 2020	Oct	2020	Oct-2020	paper
8835914	cigarette, zigarettenschachtel	49.1098138/8.4695405	DE	Sat Oct 03 2020	Oct	2020	Oct-2020	cigarette	zigarettenschachtel
8835913	cigarettebox	49.1098084/8.4694584	DE	Sat Oct 03 2020	Oct	2020	Oct-2020	cigarettebox
8835912	plastic	49.1098011/8.4694601	DE	Sat Oct 03 2020	Oct	2020	Oct-2020	plastic
8835911	plastic	49.1098155/8.469538	DE	Sat Oct 03 2020	Oct	2020	Oct-2020	plastic
8835910	plastic	49.1096948/8.468235	DE	Sat Oct 03 2020	Oct	2020	Oct-2020	plastic
8835909	gummihandschuh	49.1099873/8.4690736	DE	Sat Oct 03 2020	Oct	2020	Oct-2020	gummihandschuh
8835908	plastic	49.1094458/8.4693441	DE	Sat Oct 03 2020	Oct	2020	Oct-2020	plastic
8835907	plastic	49.1094169/8.4691819	DE	Sat Oct 03 2020	Oct	2020	Oct-2020	plastic
8835906	plastic	49.1097449/8.4695121	DE	Sat Oct 03 2020	Oct	2020	Oct-2020	plastic
8835905	pappe	49.1094923/8.4686528	DE	Sat Oct 03 2020	Oct	2020	Oct-2020	pappe
8835904	plastic	49.1094632/8.4693629	DE	Sat Oct 03 2020	Oct	2020	Oct-2020	plastic
8835903	paper	49.1092797/8.4677452	DE	Sat Oct 03 2020	Oct	2020	Oct-2020	paper
8835902	metall	49.1096703/8.4681801	DE	Sat Oct 03 2020	Oct	2020	Oct-2020	metall
8835901	plastic	49.1096381/8.4681829	DE	Sat Oct 03 2020	Oct	2020	Oct-2020	plastic
8835900	plastic	49.1096646/8.4681727	DE	Sat Oct 03 2020	Oct	2020	Oct-2020	plastic
8835899	plastic	49.1096955/8.4678209	DE	Sat Oct 03 2020	Oct	2020	Oct-2020	plastic
8835898	plastic, tempo	49.1096479/8.4677979	DE	Sat Oct 03 2020	Oct	2020	Oct-2020	plastic	tempo
8835897	plastic	49.1096681/8.4680475	DE	Sat Oct 03 2020	Oct	2020	Oct-2020	plastic
8835896	plastic	49.1096661/8.4677821	DE	Sat Oct 03 2020	Oct	2020	Oct-2020	plastic
8835895	bag, plastic	49.1097052/8.4677637	DE	Sat Oct 03 2020	Oct	2020	Oct-2020	bag	plastic
8835894	styropor	49.1097122/8.4677894	DE	Sat Oct 03 2020	Oct	2020	Oct-2020	styropor
8835892	metall	49.1096727/8.468186	DE	Sat Oct 03 2020	Oct	2020	Oct-2020	metall
8835891	plastic	49.1096948/8.468235	DE	Sat Oct 03 2020	Oct	2020	Oct-2020	plastic
8835890	plastic, wrapper	49.1096747/8.467769	DE	Sat Oct 03 2020	Oct	2020	Oct-2020	plastic	wrapper
8835889	plastic	49.1096949/8.4678155	DE	Sat Oct 03 2020	Oct	2020	Oct-2020	plastic
8835888	plastic, plasticbottle	49.1097115/8.467787	DE	Sat Oct 03 2020	Oct	2020	Oct-2020	plastic	plasticbottle
8825602	paper, kassenzettel	49.1092167/8.4677805	DE	Sat Oct 03 2020	Oct	2020	Oct-2020	paper	kassenzettel
8825600	plastic, schokoriegelpapier, wrapper	49.1091868/8.4677803	DE	Sat Oct 03 2020	Oct	2020	Oct-2020	plastic	schokoriegelpapier	wrapper
8823357	candywrapper, plastic, aluminium	54.6194846/13.3779641	DE	Sat Oct 03 2020	Oct	2020	Oct-2020	candywrapper	plastic	aluminium
8823356	plastic, candy, wrapper	54.6207345/13.3777919	DE	Sat Oct 03 2020	Oct	2020	Oct-2020	plastic	candy	wrapper
8823355	wrapper, plastic, candy	54.6106774/13.3822428	DE	Sat Oct 03 2020	Oct	2020	Oct-2020	wrapper	plastic	candy
8823353	glassbottle, beer, glass	54.6120605/13.381418	DE	Sat Oct 03 2020	Oct	2020	Oct-2020	glassbottle	beer	glass
8823352	candy, plastic, wrapper	54.6191094/13.3778182	DE	Sat Oct 03 2020	Oct	2020	Oct-2020	candy	plastic	wrapper
8823351	plastic, piece	54.6191195/13.3778121	DE	Sat Oct 03 2020	Oct	2020	Oct-2020	plastic	piece
8823350	glass, glassbottle, beer	54.6114054/13.3821659	DE	Sat Oct 03 2020	Oct	2020	Oct-2020	glass	glassbottle	beer
8823349	cigarettebutt	54.6113909/13.3822968	DE	Sat Oct 03 2020	Oct	2020	Oct-2020	cigarettebutt
8823348	paper, plastic, cigarettepack	54.6106698/13.3822276	DE	Sat Oct 03 2020	Oct	2020	Oct-2020	paper	plastic	cigarettepack
8823347	aluminum, bottlecap, metal	54.5733321/13.4347615	DE	Sat Oct 03 2020	Oct	2020	Oct-2020	aluminum	bottlecap	metal
8823346	plastic, wrapper, candy	54.6172362/13.3788903	DE	Sat Oct 03 2020	Oct	2020	Oct-2020	plastic	wrapper	candy
8823345	candywrapper, plastic, aluminium	54.6194862/13.3779656	DE	Sat Oct 03 2020	Oct	2020	Oct-2020	candywrapper	plastic	aluminium
8823344	plastic, wrapper, candy	54.6194843/13.377968	DE	Sat Oct 03 2020	Oct	2020	Oct-2020	plastic	wrapper	candy
8821326	paper, napkin	50.7061987745709/7.29061651995256	DE	Sat Oct 03 2020	Oct	2020	Oct-2020	paper	napkin
8821177	aluminium, foil	50.7056625649621/7.28904000001197	DE	Sat Oct 03 2020	Oct	2020	Oct-2020	aluminium	foil
8821098	plastic	50.7056286419948/7.28915002965841	DE	Sat Oct 03 2020	Oct	2020	Oct-2020	plastic
8821064	paper	49.4091400398124/11.0347176785194	DE	Sat Oct 03 2020	Oct	2020	Oct-2020	paper
8821063	plastic	49.4092332821577/11.0345496342156	DE	Sat Oct 03 2020	Oct	2020	Oct-2020	plastic
8821062	plastic	49.4093394182438/11.0346948086363	DE	Sat Oct 03 2020	Oct	2020	Oct-2020	plastic
8821060	cigarettepack	49.4097514718633/11.0503104639004	DE	Sat Oct 03 2020	Oct	2020	Oct-2020	cigarettepack
8821044	plastic	49.409758372443/11.05044683012	DE	Sat Oct 03 2020	Oct	2020	Oct-2020	plastic
8821040	plastic	49.4098384075088/11.050473144327	DE	Sat Oct 03 2020	Oct	2020	Oct-2020	plastic
8821025	cigarettepack	49.4097845816717/11.0505267019741	DE	Sat Oct 03 2020	Oct	2020	Oct-2020	cigarettepack
8821006	cup	49.411131982308/11.0642065675801	DE	Sat Oct 03 2020	Oct	2020	Oct-2020	cup
8821005	plastic	49.411043035828/11.0644924578529	DE	Sat Oct 03 2020	Oct	2020	Oct-2020	plastic
8821003	cup	49.4108925013803/11.0643872858367	DE	Sat Oct 03 2020	Oct	2020	Oct-2020	cup
8820999	plastic	49.4105993869865/11.0649376090999	DE	Sat Oct 03 2020	Oct	2020	Oct-2020	plastic
8820978	cup	49.4080630463905/11.0658778034743	DE	Sat Oct 03 2020	Oct	2020	Oct-2020	cup
8820977	plastic	49.4220772879346/11.098363860053	DE	Sat Oct 03 2020	Oct	2020	Oct-2020	plastic
8820976	plastic	49.4222796647306/11.098313172603	DE	Sat Oct 03 2020	Oct	2020	Oct-2020	plastic
8820972	cigarettepack	49.4292606179058/11.1020602482545	DE	Sat Oct 03 2020	Oct	2020	Oct-2020	cigarettepack
8820968	cigarettepack	49.4145384257764/11.0792610569092	DE	Sat Oct 03 2020	Oct	2020	Oct-2020	cigarettepack
8820964	cup	49.4287110088287/11.099639147373	DE	Sat Oct 03 2020	Oct	2020	Oct-2020	cup
8820961	bag	49.4286446321889/11.0998528360193	DE	Sat Oct 03 2020	Oct	2020	Oct-2020	bag
8820960	plastic	49.428731688159/11.0997744400293	DE	Sat Oct 03 2020	Oct	2020	Oct-2020	plastic
8820959	aluminum, plastic	49.4286999627907/11.0989207223695	DE	Sat Oct 03 2020	Oct	2020	Oct-2020	aluminum	plastic
8820956	plastic	49.4203420237908/11.092010669452	DE	Sat Oct 03 2020	Oct	2020	Oct-2020	plastic
8820955	plasticbottle	49.4286829444577/11.0990176861189	DE	Sat Oct 03 2020	Oct	2020	Oct-2020	plasticbottle
8820954	plastic	49.4207756759833/11.0922014380852	DE	Sat Oct 03 2020	Oct	2020	Oct-2020	plastic
8820953	cigarettepack	49.4203244279772/11.0918432304307	DE	Sat Oct 03 2020	Oct	2020	Oct-2020	cigarettepack
8820952	plastic	49.4221973463947/11.0983636530378	DE	Sat Oct 03 2020	Oct	2020	Oct-2020	plastic
8820830	plastic	50.705549697274/7.28813464653801	DE	Sat Oct 03 2020	Oct	2020	Oct-2020	plastic
8820696	candy, wrapper	50.7063376145704/7.28937996212607	DE	Sat Oct 03 2020	Oct	2020	Oct-2020	candy	wrapper
8820548	plastic, packaging	50.7058389834661/7.28901726592479	DE	Sat Oct 03 2020	Oct	2020	Oct-2020	plastic	packaging
8820458	plastic, bag	50.7063156894259/7.28953904013977	DE	Sat Oct 03 2020	Oct	2020	Oct-2020	plastic	bag
8819872	paper, tissue	50.7056323427525/7.29551629645364	DE	Sat Oct 03 2020	Oct	2020	Oct-2020	paper	tissue
8817849	paper	50.7071315667163/7.29682646502489	DE	Sat Oct 03 2020	Oct	2020	Oct-2020	paper
8816686	glass, bottle	49.4361790016437/11.082311812234	DE	Sat Oct 03 2020	Oct	2020	Oct-2020	glass	bottle
8816670	plastic	49.4221973463947/11.0983636530378	DE	Sat Oct 03 2020	Oct	2020	Oct-2020	plastic
8816665	bag	49.4225792315306/11.0981958714853	DE	Sat Oct 03 2020	Oct	2020	Oct-2020	bag
8816664	bag	49.4225792315306/11.0981958714853	DE	Sat Oct 03 2020	Oct	2020	Oct-2020	bag
8816663	plastic	49.4225792315306/11.0981958714853	DE	Sat Oct 03 2020	Oct	2020	Oct-2020	plastic
8816654	plastic	49.4225972212934/11.0982906174644	DE	Sat Oct 03 2020	Oct	2020	Oct-2020	plastic
8816653	bottle	49.42256485217/11.0982720825804	DE	Sat Oct 03 2020	Oct	2020	Oct-2020	bottle
8816651	plastic	49.424788574617/11.0977120459856	DE	Sat Oct 03 2020	Oct	2020	Oct-2020	plastic
8816650	cup	49.4225839913495/11.0981571727366	DE	Sat Oct 03 2020	Oct	2020	Oct-2020	cup
8816647	plastic, cigarettepack	49.4243881738399/11.0977039081272	DE	Sat Oct 03 2020	Oct	2020	Oct-2020	plastic	cigarettepack
8816646	wrapper	49.4248894785718/11.0975972355766	DE	Sat Oct 03 2020	Oct	2020	Oct-2020	wrapper
8816645	coffeecup	49.424788574617/11.0977120459856	DE	Sat Oct 03 2020	Oct	2020	Oct-2020	coffeecup
8816643	plastic	49.4263001333768/11.0967797183969	DE	Sat Oct 03 2020	Oct	2020	Oct-2020	plastic
8816641	cigarettepack	49.4261765968821/11.0969269568918	DE	Sat Oct 03 2020	Oct	2020	Oct-2020	cigarettepack
8816638	plastic	49.4261364062318/11.0971518299872	DE	Sat Oct 03 2020	Oct	2020	Oct-2020	plastic
8816636	cup	49.42608664141/11.0970642159383	DE	Sat Oct 03 2020	Oct	2020	Oct-2020	cup
8816632	aluminum	49.4283131784465/11.0969173814996	DE	Sat Oct 03 2020	Oct	2020	Oct-2020	aluminum
8816627	plastic	49.4260641024919/11.0974055152626	DE	Sat Oct 03 2020	Oct	2020	Oct-2020	plastic
8816625	plastic	49.4282433338282/11.0971036791961	DE	Sat Oct 03 2020	Oct	2020	Oct-2020	plastic
8816623	plastic	49.4259365370412/11.0975999699156	DE	Sat Oct 03 2020	Oct	2020	Oct-2020	plastic
8816620	plastic	49.4265447816983/11.0963798287775	DE	Sat Oct 03 2020	Oct	2020	Oct-2020	plastic
8816619	can	49.4259301991805/11.0975312472624	DE	Sat Oct 03 2020	Oct	2020	Oct-2020	can
8816610	plastic	49.4264552738975/11.0961777654441	DE	Sat Oct 03 2020	Oct	2020	Oct-2020	plastic
8816609	coffeecup	49.4261198501188/11.0967339339392	DE	Sat Oct 03 2020	Oct	2020	Oct-2020	coffeecup
8816608	plastic	49.4257675230726/11.0976156509892	DE	Sat Oct 03 2020	Oct	2020	Oct-2020	plastic
8816606	wrapper	49.4256341516681/11.0977853496507	DE	Sat Oct 03 2020	Oct	2020	Oct-2020	wrapper
8816596	paper	49.4284704615215/11.0969949703693	DE	Sat Oct 03 2020	Oct	2020	Oct-2020	paper
8816590	coffeecup	49.4257747508313/11.0976063859816	DE	Sat Oct 03 2020	Oct	2020	Oct-2020	coffeecup
8816588	plastic	49.4258728588504/11.09744134822	DE	Sat Oct 03 2020	Oct	2020	Oct-2020	plastic
8816587	facemask	49.4257356108798/11.0976160092139	DE	Sat Oct 03 2020	Oct	2020	Oct-2020	facemask
8816585	cigarettepack	49.4271758473412/11.0974304057009	DE	Sat Oct 03 2020	Oct	2020	Oct-2020	cigarettepack
8816575	plastic, bottle	49.4258728588504/11.09744134822	DE	Sat Oct 03 2020	Oct	2020	Oct-2020	plastic	bottle
8816571	plastic	49.426208062708/11.0969692963402	DE	Sat Oct 03 2020	Oct	2020	Oct-2020	plastic
8816568	paper, tissue	49.4270571835053/11.0972153506588	DE	Sat Oct 03 2020	Oct	2020	Oct-2020	paper	tissue
8816566	caprisun	49.4280361929524/11.0960097475749	DE	Sat Oct 03 2020	Oct	2020	Oct-2020	caprisun
8816563	facemask	49.4278877192609/11.0957240133656	DE	Sat Oct 03 2020	Oct	2020	Oct-2020	facemask
8816559	aluminum, can	49.4271389228366/11.0971777787461	DE	Sat Oct 03 2020	Oct	2020	Oct-2020	aluminum	can
8816555	cigarettepack	49.4280324669707/11.0961097385996	DE	Sat Oct 03 2020	Oct	2020	Oct-2020	cigarettepack
8816550	facemask	49.4274743489628/11.0971093966894	DE	Sat Oct 03 2020	Oct	2020	Oct-2020	facemask
8816548	plastic	49.4282027552402/11.0970873114752	DE	Sat Oct 03 2020	Oct	2020	Oct-2020	plastic
8816547	cigarettepack	49.4280215762651/11.0956253716868	DE	Sat Oct 03 2020	Oct	2020	Oct-2020	cigarettepack
8816544	cigarettepack	49.4277902312538/11.0953176490513	DE	Sat Oct 03 2020	Oct	2020	Oct-2020	cigarettepack
8816539	cigarettepack	49.4278477619255/11.0956651789729	DE	Sat Oct 03 2020	Oct	2020	Oct-2020	cigarettepack
8816538	cup	49.4276103184514/11.0952105988367	DE	Sat Oct 03 2020	Oct	2020	Oct-2020	cup
8816535	cup	49.4343117102358/11.0836842473581	DE	Sat Oct 03 2020	Oct	2020	Oct-2020	cup
8816534	plastic	49.4338971039162/11.0837303374763	DE	Sat Oct 03 2020	Oct	2020	Oct-2020	plastic
8816533	facemask	49.4340105847392/11.0838374471258	DE	Sat Oct 03 2020	Oct	2020	Oct-2020	facemask
8816530	paper	49.4346807948223/11.0837499255662	DE	Sat Oct 03 2020	Oct	2020	Oct-2020	paper
8816527	cigarettepack	49.4347438106572/11.0837447188822	DE	Sat Oct 03 2020	Oct	2020	Oct-2020	cigarettepack
8816526	wrapper	49.4347408712476/11.083629523997	DE	Sat Oct 03 2020	Oct	2020	Oct-2020	wrapper
8816521	paper	49.4349365696223/11.0795975015326	DE	Sat Oct 03 2020	Oct	2020	Oct-2020	paper
8816520	facemask	49.4352521076548/11.0796323866775	DE	Sat Oct 03 2020	Oct	2020	Oct-2020	facemask
8816517	plastic	49.4348176862697/11.0837029057369	DE	Sat Oct 03 2020	Oct	2020	Oct-2020	plastic
8816514	facemask	49.4350371227928/11.0831447405487	DE	Sat Oct 03 2020	Oct	2020	Oct-2020	facemask
8816510	plastic	49.4356511471979/11.0825352164257	DE	Sat Oct 03 2020	Oct	2020	Oct-2020	plastic
8816507	plastic, bag	49.4356333077679/11.0826280924332	DE	Sat Oct 03 2020	Oct	2020	Oct-2020	plastic	bag
8816501	cigarettepack	49.4356815669427/11.0825890548415	DE	Sat Oct 03 2020	Oct	2020	Oct-2020	cigarettepack
8816500	cigarettepack	49.4355575810005/11.0826947945407	DE	Sat Oct 03 2020	Oct	2020	Oct-2020	cigarettepack
8816499	plastic, bag	49.435584049072/11.0826374472272	DE	Sat Oct 03 2020	Oct	2020	Oct-2020	plastic	bag
8816498	bottle	49.435584049072/11.0826374472272	DE	Sat Oct 03 2020	Oct	2020	Oct-2020	bottle
8816497	plastic, bottle	49.4351230001918/11.0795855242027	DE	Sat Oct 03 2020	Oct	2020	Oct-2020	plastic	bottle
8816493	can, aluminum	49.436143064559/11.0821467078948	DE	Sat Oct 03 2020	Oct	2020	Oct-2020	can	aluminum
8811598	facemask	49.4328768294135/11.0813076926396	DE	Sat Oct 03 2020	Oct	2020	Oct-2020	facemask
8811596	facemask	49.430691455513/11.0824966226863	DE	Sat Oct 03 2020	Oct	2020	Oct-2020	facemask
8811595	plastic	49.4306563401008/11.0821699281842	DE	Sat Oct 03 2020	Oct	2020	Oct-2020	plastic
8811594	plastic, bag	49.4307109902431/11.0822445286042	DE	Sat Oct 03 2020	Oct	2020	Oct-2020	plastic	bag
8811593	plastic	49.4310503543853/11.0821145923953	DE	Sat Oct 03 2020	Oct	2020	Oct-2020	plastic
8811591	cigarettepack	49.4302586946464/11.0821601972549	DE	Sat Oct 03 2020	Oct	2020	Oct-2020	cigarettepack
8811587	cigarettepack	49.4295651142824/11.0848634871062	DE	Sat Oct 03 2020	Oct	2020	Oct-2020	cigarettepack
8811585	glass, bottle	49.4301193036619/11.0827211325184	DE	Sat Oct 03 2020	Oct	2020	Oct-2020	glass	bottle
8811583	cigarettepack	49.4296165028216/11.0848151160635	DE	Sat Oct 03 2020	Oct	2020	Oct-2020	cigarettepack
8811580	paper	49.4320522602239/11.0833903166885	DE	Sat Oct 03 2020	Oct	2020	Oct-2020	paper
8811579	cigarettepack	49.4295704792056/11.0848891457407	DE	Sat Oct 03 2020	Oct	2020	Oct-2020	cigarettepack
8811577	cigarettepack	49.4318006717404/11.0834862172292	DE	Sat Oct 03 2020	Oct	2020	Oct-2020	cigarettepack
8811576	plastic, bag	49.4313008387356/11.083052580361	DE	Sat Oct 03 2020	Oct	2020	Oct-2020	plastic	bag
8811575	cigarettepack	49.4300192865704/11.0849168739689	DE	Sat Oct 03 2020	Oct	2020	Oct-2020	cigarettepack
8811574	plastic, bag	49.4300081441313/11.0851851360713	DE	Sat Oct 03 2020	Oct	2020	Oct-2020	plastic	bag
8811573	cup, plastic, paper	49.4300942892228/11.0851553549885	DE	Sat Oct 03 2020	Oct	2020	Oct-2020	cup	plastic	paper
8811572	paper, tissue	49.4308218629717/11.0827013109419	DE	Sat Oct 03 2020	Oct	2020	Oct-2020	paper	tissue
8811571	plastic	49.4306646356035/11.0849484998332	DE	Sat Oct 03 2020	Oct	2020	Oct-2020	plastic
8811570	cigarettepack	49.4307440229841/11.0830066661239	DE	Sat Oct 03 2020	Oct	2020	Oct-2020	cigarettepack
[truncated: 28,957 more rows]
