# Supplementary material for: Lockdown Litter: A critical analysis of global COVID-19 PPE litter and measures for mitigation
Source: Research Square preprint supplement (doi:10.21203/rs.3.rs-134183/v1), 2021-03-31
Supplement: Supplementary file 3 [file 738d07c504be307d26d3bd76.csv]

								Tags
Litter	Tags	Location (Lat/Long)	Country	Date				aluminum	can
9077254	aluminum, can	-0.236252271	NZ	Fri Oct 09 2020	Oct	2020	Oct-2020	plastic
9077253	plastic	-0.236258177	NZ	Fri Oct 09 2020	Oct	2020	Oct-2020	cigarette
9077252	cigarette	-0.236257522	NZ	Fri Oct 09 2020	Oct	2020	Oct-2020	plastic
9077251	plastic	-0.236252277	NZ	Fri Oct 09 2020	Oct	2020	Oct-2020	plastic	straw
9077250	plastic, straw	-0.236253151	NZ	Fri Oct 09 2020	Oct	2020	Oct-2020	cigarette
9077249	cigarette	-0.236258526	NZ	Fri Oct 09 2020	Oct	2020	Oct-2020	cigarette
9077248	cigarette	-0.236258306	NZ	Fri Oct 09 2020	Oct	2020	Oct-2020	cigarette
9077247	cigarette	-0.236258591	NZ	Fri Oct 09 2020	Oct	2020	Oct-2020	cigarette
9077246	cigarette	-0.236258306	NZ	Fri Oct 09 2020	Oct	2020	Oct-2020	cigarette
9077245	cigarette	-0.236258306	NZ	Fri Oct 09 2020	Oct	2020	Oct-2020	cigarette
9077244	cigarette	-0.236258306	NZ	Fri Oct 09 2020	Oct	2020	Oct-2020	cigarette
9077242	cigarette	-0.236258306	NZ	Fri Oct 09 2020	Oct	2020	Oct-2020	cigarette
9077241	cigarette	-0.236258596	NZ	Fri Oct 09 2020	Oct	2020	Oct-2020	cigarette
9077240	cigarette	-0.236258306	NZ	Fri Oct 09 2020	Oct	2020	Oct-2020	cigarette
9077239	cigarette	-0.236258306	NZ	Fri Oct 09 2020	Oct	2020	Oct-2020	cigarette
9077238	cigarette	-0.236258306	NZ	Fri Oct 09 2020	Oct	2020	Oct-2020	cigarette
9077237	cigarette	-0.236258591	NZ	Fri Oct 09 2020	Oct	2020	Oct-2020	cigarette
9077236	cigarette	-0.236258591	NZ	Fri Oct 09 2020	Oct	2020	Oct-2020	cigarette
9077235	cigarette	-0.236258549	NZ	Fri Oct 09 2020	Oct	2020	Oct-2020	cigarette
9077234	cigarette	-0.236258593	NZ	Fri Oct 09 2020	Oct	2020	Oct-2020	cigarette
9077233	cigarette	-0.236258507	NZ	Fri Oct 09 2020	Oct	2020	Oct-2020	cigarette
9077232	cigarette	-0.236258329	NZ	Fri Oct 09 2020	Oct	2020	Oct-2020	cigarette
9077231	cigarette	-0.236258507	NZ	Fri Oct 09 2020	Oct	2020	Oct-2020	cigarette
9077230	cigarette	-0.236258329	NZ	Fri Oct 09 2020	Oct	2020	Oct-2020	cigarette
9077229	cigarette	-0.23625827	NZ	Fri Oct 09 2020	Oct	2020	Oct-2020	cigarette
9077228	cigarette	-0.236258356	NZ	Fri Oct 09 2020	Oct	2020	Oct-2020	cigarette
9077227	cigarette	-0.236258051	NZ	Fri Oct 09 2020	Oct	2020	Oct-2020	plastic
9077226	plastic	-0.236258168	NZ	Fri Oct 09 2020	Oct	2020	Oct-2020	cigarette
9077225	cigarette	-0.23625827	NZ	Fri Oct 09 2020	Oct	2020	Oct-2020	cigarette
9077224	cigarette	-0.236258223	NZ	Fri Oct 09 2020	Oct	2020	Oct-2020	cigarette
9077223	cigarette	-0.236258131	NZ	Fri Oct 09 2020	Oct	2020	Oct-2020	cigarette
9077222	cigarette	-0.236258283	NZ	Fri Oct 09 2020	Oct	2020	Oct-2020	cigarette
9077221	cigarette	-0.23625805	NZ	Fri Oct 09 2020	Oct	2020	Oct-2020	cigarette
9077220	cigarette	-0.236258108	NZ	Fri Oct 09 2020	Oct	2020	Oct-2020	cigarette
9077219	cigarette	-0.236258075	NZ	Fri Oct 09 2020	Oct	2020	Oct-2020	paper
9077218	paper	-0.236258262	NZ	Fri Oct 09 2020	Oct	2020	Oct-2020	cigarette
9077217	cigarette	-0.236258197	NZ	Fri Oct 09 2020	Oct	2020	Oct-2020	cigarette
9077216	cigarette	-0.23625827	NZ	Fri Oct 09 2020	Oct	2020	Oct-2020	cigarette
9077215	cigarette	-0.236258095	NZ	Fri Oct 09 2020	Oct	2020	Oct-2020	cigarette
9077214	cigarette	-0.236258183	NZ	Fri Oct 09 2020	Oct	2020	Oct-2020	cigarette
9077213	cigarette	-0.236258313	NZ	Fri Oct 09 2020	Oct	2020	Oct-2020	cigarette
9077212	cigarette	-0.236258165	NZ	Fri Oct 09 2020	Oct	2020	Oct-2020	cigarette
9077211	cigarette	-0.236258248	NZ	Fri Oct 09 2020	Oct	2020	Oct-2020	cigarette
9077210	cigarette	-0.236258263	NZ	Fri Oct 09 2020	Oct	2020	Oct-2020	cigarette
9077209	cigarette	-0.236258184	NZ	Fri Oct 09 2020	Oct	2020	Oct-2020	cigarette
9077208	cigarette	-0.236258226	NZ	Fri Oct 09 2020	Oct	2020	Oct-2020	cigarette
9077207	cigarette	-0.236258066	NZ	Fri Oct 09 2020	Oct	2020	Oct-2020	cigarette
9077206	cigarette	-0.236258302	NZ	Fri Oct 09 2020	Oct	2020	Oct-2020	cigarette
9077205	cigarette	-0.23625814	NZ	Fri Oct 09 2020	Oct	2020	Oct-2020	cigarette
9077204	cigarette	-0.236258095	NZ	Fri Oct 09 2020	Oct	2020	Oct-2020	plastic
9077203	plastic	-0.236258139	NZ	Fri Oct 09 2020	Oct	2020	Oct-2020	cigarette
9077202	cigarette	-0.23625785	NZ	Fri Oct 09 2020	Oct	2020	Oct-2020	cigarette	paper
9077201	cigarette, paper	-0.236258077	NZ	Fri Oct 09 2020	Oct	2020	Oct-2020	cigarette
9077200	cigarette	-0.236258114	NZ	Fri Oct 09 2020	Oct	2020	Oct-2020	cigarette
9077199	cigarette	-0.236258149	NZ	Fri Oct 09 2020	Oct	2020	Oct-2020	iceblockstick
9077198	iceblockstick	-0.236257862	NZ	Fri Oct 09 2020	Oct	2020	Oct-2020	aluminum
9077197	aluminum	-0.236258546	NZ	Fri Oct 09 2020	Oct	2020	Oct-2020	cigarette
9077196	cigarette	-0.236258179	NZ	Fri Oct 09 2020	Oct	2020	Oct-2020	glass	bottle
9077195	glass, bottle	-0.236258697	NZ	Fri Oct 09 2020	Oct	2020	Oct-2020	cigarette
9077194	cigarette	-0.23625817	NZ	Fri Oct 09 2020	Oct	2020	Oct-2020	cigarette
9077193	cigarette	-0.236258077	NZ	Fri Oct 09 2020	Oct	2020	Oct-2020	cigarette
9077192	cigarette	-0.236258059	NZ	Fri Oct 09 2020	Oct	2020	Oct-2020	cigarette
9077191	cigarette	-0.236258149	NZ	Fri Oct 09 2020	Oct	2020	Oct-2020	cigarette
9077190	cigarette	-0.23625809	NZ	Fri Oct 09 2020	Oct	2020	Oct-2020	cigarette
9077189	cigarette	-0.23625809	NZ	Fri Oct 09 2020	Oct	2020	Oct-2020	cigarette
9077188	cigarette	-0.236258081	NZ	Fri Oct 09 2020	Oct	2020	Oct-2020	cigarette
9077187	cigarette	-0.236258179	NZ	Fri Oct 09 2020	Oct	2020	Oct-2020	cigarette
9077186	cigarette	-0.236258239	NZ	Fri Oct 09 2020	Oct	2020	Oct-2020	paper
9077185	paper	-0.236258278	NZ	Fri Oct 09 2020	Oct	2020	Oct-2020	cigarette
9077184	cigarette	-0.236257936	NZ	Fri Oct 09 2020	Oct	2020	Oct-2020	cigarette
9077183	cigarette	-0.236258109	NZ	Fri Oct 09 2020	Oct	2020	Oct-2020	cigarette
9077182	cigarette	-0.236258042	NZ	Fri Oct 09 2020	Oct	2020	Oct-2020	cigarette
9077181	cigarette	-0.236258155	NZ	Fri Oct 09 2020	Oct	2020	Oct-2020	plastic
9077180	plastic	-0.236258088	NZ	Fri Oct 09 2020	Oct	2020	Oct-2020	styrofoam
9077179	styrofoam	-0.236257936	NZ	Fri Oct 09 2020	Oct	2020	Oct-2020	cigarette
9077178	cigarette	-0.236258232	NZ	Fri Oct 09 2020	Oct	2020	Oct-2020	cigarette
9077177	cigarette	-0.236258232	NZ	Fri Oct 09 2020	Oct	2020	Oct-2020	cigarette
9077176	cigarette	-0.236258232	NZ	Fri Oct 09 2020	Oct	2020	Oct-2020	plastic
9077175	plastic	-0.236258035	NZ	Fri Oct 09 2020	Oct	2020	Oct-2020	cardboard
9077174	cardboard	-0.23625756	NZ	Fri Oct 09 2020	Oct	2020	Oct-2020	cigarette
9077173	cigarette	-0.236256797	NZ	Fri Oct 09 2020	Oct	2020	Oct-2020	cigarette
9077172	cigarette	-0.236256921	NZ	Fri Oct 09 2020	Oct	2020	Oct-2020	cigarette
9077171	cigarette	-0.236256475	NZ	Fri Oct 09 2020	Oct	2020	Oct-2020	cigarette
9077170	cigarette	-0.236256475	NZ	Fri Oct 09 2020	Oct	2020	Oct-2020	cigarette
9077169	cigarette	-0.236256479	NZ	Fri Oct 09 2020	Oct	2020	Oct-2020	cigarette
9077168	cigarette	-0.236256627	NZ	Fri Oct 09 2020	Oct	2020	Oct-2020	cigarette
9077167	cigarette	-0.23625675	NZ	Fri Oct 09 2020	Oct	2020	Oct-2020	cigarette
9077166	cigarette	-0.236256475	NZ	Fri Oct 09 2020	Oct	2020	Oct-2020	cigarette
9077165	cigarette	-0.236256547	NZ	Fri Oct 09 2020	Oct	2020	Oct-2020	cigarette
9077164	cigarette	-0.2362567	NZ	Fri Oct 09 2020	Oct	2020	Oct-2020	cigarette
9077163	cigarette	-0.2362567	NZ	Fri Oct 09 2020	Oct	2020	Oct-2020	plastic
9077162	plastic	-0.236256965	NZ	Fri Oct 09 2020	Oct	2020	Oct-2020	cigarette
9077161	cigarette	-0.236256884	NZ	Fri Oct 09 2020	Oct	2020	Oct-2020	paper
9077160	paper	-0.236256968	NZ	Fri Oct 09 2020	Oct	2020	Oct-2020	cigarette
9077159	cigarette	-0.236256487	NZ	Fri Oct 09 2020	Oct	2020	Oct-2020	cigarette
9077158	cigarette	-0.2362567	NZ	Fri Oct 09 2020	Oct	2020	Oct-2020	cigarette
9077157	cigarette	-0.236257354	NZ	Fri Oct 09 2020	Oct	2020	Oct-2020	cigarette
9077156	cigarette	-0.236257654	NZ	Fri Oct 09 2020	Oct	2020	Oct-2020	aluminum
9077155	aluminum	-0.236256952	NZ	Fri Oct 09 2020	Oct	2020	Oct-2020	bottlecap	metal
9077154	bottlecap, metal	-0.236258149	NZ	Fri Oct 09 2020	Oct	2020	Oct-2020	aluminum	tierip
9077153	aluminum, tierip	-0.236257541	NZ	Fri Oct 09 2020	Oct	2020	Oct-2020	cigarette
9077152	cigarette	-0.236257011	NZ	Fri Oct 09 2020	Oct	2020	Oct-2020	cigarette
9077151	cigarette	-0.236257309	NZ	Fri Oct 09 2020	Oct	2020	Oct-2020	plastic
9077150	plastic	-0.236257407	NZ	Fri Oct 09 2020	Oct	2020	Oct-2020	cigarette
9077149	cigarette	-0.236257247	NZ	Fri Oct 09 2020	Oct	2020	Oct-2020	bottlecap	metal
9077148	bottlecap, metal	-0.236258164	NZ	Fri Oct 09 2020	Oct	2020	Oct-2020	cigarette
9077147	cigarette	-0.23625762	NZ	Fri Oct 09 2020	Oct	2020	Oct-2020	cigarette
9077146	cigarette	-0.236258141	NZ	Fri Oct 09 2020	Oct	2020	Oct-2020	cigarette
9077145	cigarette	-0.236258222	NZ	Fri Oct 09 2020	Oct	2020	Oct-2020	cigarette
9077144	cigarette	-0.23625762	NZ	Fri Oct 09 2020	Oct	2020	Oct-2020	cigarette
9077143	cigarette	-0.236257625	NZ	Fri Oct 09 2020	Oct	2020	Oct-2020	plastic	cigarette
9077142	plastic, cigarette	-0.236257633	NZ	Fri Oct 09 2020	Oct	2020	Oct-2020	cigarette
9077141	cigarette	-0.236257535	NZ	Fri Oct 09 2020	Oct	2020	Oct-2020	cigarette
9077140	cigarette	-0.23625757	NZ	Fri Oct 09 2020	Oct	2020	Oct-2020	cigarette
9077139	cigarette	-0.236257709	NZ	Fri Oct 09 2020	Oct	2020	Oct-2020	cigarette
9077138	cigarette	-0.236257655	NZ	Fri Oct 09 2020	Oct	2020	Oct-2020	cigarette
9077137	cigarette	-0.23625772	NZ	Fri Oct 09 2020	Oct	2020	Oct-2020	cigarette
9077136	cigarette	-0.236257569	NZ	Fri Oct 09 2020	Oct	2020	Oct-2020	bottlecap	metal
9077135	bottlecap, metal	-0.23625749	NZ	Fri Oct 09 2020	Oct	2020	Oct-2020	cigarette
9077134	cigarette	-0.236257647	NZ	Fri Oct 09 2020	Oct	2020	Oct-2020	cigarette
9077133	cigarette	-0.236257702	NZ	Fri Oct 09 2020	Oct	2020	Oct-2020	paper
9077132	paper	-0.236257734	NZ	Fri Oct 09 2020	Oct	2020	Oct-2020	cigarette
9077131	cigarette	-0.23625762	NZ	Fri Oct 09 2020	Oct	2020	Oct-2020	cigarette
9077130	cigarette	-0.236257739	NZ	Fri Oct 09 2020	Oct	2020	Oct-2020	cigarette	plastic
9077129	cigarette, plastic	-0.236257655	NZ	Fri Oct 09 2020	Oct	2020	Oct-2020	cigarette	plastic
9077128	cigarette, plastic	-0.236257859	NZ	Fri Oct 09 2020	Oct	2020	Oct-2020	cigarette
9077127	cigarette	-0.236258199	NZ	Fri Oct 09 2020	Oct	2020	Oct-2020	cigarette
9077126	cigarette	-0.23625833	NZ	Fri Oct 09 2020	Oct	2020	Oct-2020	cigarette
9077125	cigarette	-0.236258323	NZ	Fri Oct 09 2020	Oct	2020	Oct-2020	cigarette
9077124	cigarette	-0.236258325	NZ	Fri Oct 09 2020	Oct	2020	Oct-2020	cigarette
9077123	cigarette	-0.236258021	NZ	Fri Oct 09 2020	Oct	2020	Oct-2020	cigarette
9077122	cigarette	-0.236257691	NZ	Fri Oct 09 2020	Oct	2020	Oct-2020	paper
9077121	paper	-0.236258062	NZ	Fri Oct 09 2020	Oct	2020	Oct-2020	cigarette
9077120	cigarette	-0.236258239	NZ	Fri Oct 09 2020	Oct	2020	Oct-2020	paper
9077119	paper	-0.23625762	NZ	Fri Oct 09 2020	Oct	2020	Oct-2020	cigarette
9077118	cigarette	-0.236258181	NZ	Fri Oct 09 2020	Oct	2020	Oct-2020	cigarette
9077117	cigarette	-0.23625828	NZ	Fri Oct 09 2020	Oct	2020	Oct-2020	cigarette
9077116	cigarette	-0.236257633	NZ	Fri Oct 09 2020	Oct	2020	Oct-2020	cigarette
9077115	cigarette	-0.236258025	NZ	Fri Oct 09 2020	Oct	2020	Oct-2020	cigarette
9077114	cigarette	-0.236257898	NZ	Fri Oct 09 2020	Oct	2020	Oct-2020	cigarette
9077113	cigarette	-0.236258147	NZ	Fri Oct 09 2020	Oct	2020	Oct-2020	cigarette
9077112	cigarette	-0.236258109	NZ	Fri Oct 09 2020	Oct	2020	Oct-2020	cigarette
9077111	cigarette	-0.236258207	NZ	Fri Oct 09 2020	Oct	2020	Oct-2020	cigarette
9077110	cigarette	-0.23625834	NZ	Fri Oct 09 2020	Oct	2020	Oct-2020	cigarette
9077109	cigarette	-0.236258075	NZ	Fri Oct 09 2020	Oct	2020	Oct-2020	cigarette
9077108	cigarette	-0.236258117	NZ	Fri Oct 09 2020	Oct	2020	Oct-2020	cigarette
9077107	cigarette	-0.236258109	NZ	Fri Oct 09 2020	Oct	2020	Oct-2020	cigarette
9077106	cigarette	-0.236258075	NZ	Fri Oct 09 2020	Oct	2020	Oct-2020	cigarette
9077105	cigarette	-0.236258275	NZ	Fri Oct 09 2020	Oct	2020	Oct-2020	cigarette
9077104	cigarette	-0.236257916	NZ	Fri Oct 09 2020	Oct	2020	Oct-2020	cigarette
9077103	cigarette	-0.236258009	NZ	Fri Oct 09 2020	Oct	2020	Oct-2020	cigarette
9077102	cigarette	-0.236258042	NZ	Fri Oct 09 2020	Oct	2020	Oct-2020	cigarette
9077101	cigarette	-0.236258122	NZ	Fri Oct 09 2020	Oct	2020	Oct-2020	cigarette
9077100	cigarette	-0.236258437	NZ	Fri Oct 09 2020	Oct	2020	Oct-2020	cigarette
9077099	cigarette	-0.236258088	NZ	Fri Oct 09 2020	Oct	2020	Oct-2020	cigarette
9077098	cigarette	-0.236258015	NZ	Fri Oct 09 2020	Oct	2020	Oct-2020	cigarette
9077097	cigarette	-0.236257947	NZ	Fri Oct 09 2020	Oct	2020	Oct-2020	cigarette
9077096	cigarette	-0.236257944	NZ	Fri Oct 09 2020	Oct	2020	Oct-2020	cigarette
9077095	cigarette	-0.236257928	NZ	Fri Oct 09 2020	Oct	2020	Oct-2020	cigarette
9077094	cigarette	-0.236257952	NZ	Fri Oct 09 2020	Oct	2020	Oct-2020	cigarette
9077093	cigarette	-0.236257864	NZ	Fri Oct 09 2020	Oct	2020	Oct-2020	cigarette
9077092	cigarette	-0.23625794	NZ	Fri Oct 09 2020	Oct	2020	Oct-2020	cigarette
9077091	cigarette	-0.236257949	NZ	Fri Oct 09 2020	Oct	2020	Oct-2020	cigarette
9077090	cigarette	-0.236257954	NZ	Fri Oct 09 2020	Oct	2020	Oct-2020	cigarette
9077089	cigarette	-0.236257947	NZ	Fri Oct 09 2020	Oct	2020	Oct-2020	cigarette
9077088	cigarette	-0.236257949	NZ	Fri Oct 09 2020	Oct	2020	Oct-2020	cigarette
9077087	cigarette	-0.236257829	NZ	Fri Oct 09 2020	Oct	2020	Oct-2020	cigarette
9077085	cigarette	-0.236257928	NZ	Fri Oct 09 2020	Oct	2020	Oct-2020	cigarette
9077084	cigarette	-0.236257949	NZ	Fri Oct 09 2020	Oct	2020	Oct-2020	cigarette
9077083	cigarette	-0.236257956	NZ	Fri Oct 09 2020	Oct	2020	Oct-2020	plastic
9077082	plastic	-0.236257945	NZ	Fri Oct 09 2020	Oct	2020	Oct-2020	cigarette
9077081	cigarette	-0.236257945	NZ	Fri Oct 09 2020	Oct	2020	Oct-2020	cigarette
9077080	cigarette	-0.236257966	NZ	Fri Oct 09 2020	Oct	2020	Oct-2020	cigarette
9077079	cigarette	-0.236257923	NZ	Fri Oct 09 2020	Oct	2020	Oct-2020	cigarette
9077078	cigarette	-0.236257949	NZ	Fri Oct 09 2020	Oct	2020	Oct-2020	cigarette
9077077	cigarette	-0.236257934	NZ	Fri Oct 09 2020	Oct	2020	Oct-2020	cigarette
9077076	cigarette	-0.236257892	NZ	Fri Oct 09 2020	Oct	2020	Oct-2020	cigarette
9077075	cigarette	-0.236257944	NZ	Fri Oct 09 2020	Oct	2020	Oct-2020	cigarette
9077074	cigarette	-0.236257946	NZ	Fri Oct 09 2020	Oct	2020	Oct-2020	cigarette
9077073	cigarette	-0.236257946	NZ	Fri Oct 09 2020	Oct	2020	Oct-2020	cigarette
9077072	cigarette	-0.236257966	NZ	Fri Oct 09 2020	Oct	2020	Oct-2020	cigarette
9077071	cigarette	-0.236257892	NZ	Fri Oct 09 2020	Oct	2020	Oct-2020	cigarette
9077070	cigarette	-0.236257966	NZ	Fri Oct 09 2020	Oct	2020	Oct-2020	cigarette
9077069	cigarette	-0.236257943	NZ	Fri Oct 09 2020	Oct	2020	Oct-2020	plastic
9077068	plastic	-0.236257923	NZ	Fri Oct 09 2020	Oct	2020	Oct-2020	cigarette
9077067	cigarette	-0.236257851	NZ	Fri Oct 09 2020	Oct	2020	Oct-2020	cigarette
9077066	cigarette	-0.236258171	NZ	Fri Oct 09 2020	Oct	2020	Oct-2020	cigarette
9077065	cigarette	-0.236257949	NZ	Fri Oct 09 2020	Oct	2020	Oct-2020	plastic
9077064	plastic	-0.236258087	NZ	Fri Oct 09 2020	Oct	2020	Oct-2020	cigarette
9077063	cigarette	-0.236257842	NZ	Fri Oct 09 2020	Oct	2020	Oct-2020	cigarette
9077062	cigarette	-0.236257817	NZ	Fri Oct 09 2020	Oct	2020	Oct-2020	cigarette
9077061	cigarette	-0.236257848	NZ	Fri Oct 09 2020	Oct	2020	Oct-2020	cigarette
9077060	cigarette	-0.236257908	NZ	Fri Oct 09 2020	Oct	2020	Oct-2020	cigarette
9077059	cigarette	-0.236257937	NZ	Fri Oct 09 2020	Oct	2020	Oct-2020	cigarette
9077058	cigarette	-0.23625795	NZ	Fri Oct 09 2020	Oct	2020	Oct-2020	cigarette
9077057	cigarette	-0.236257955	NZ	Fri Oct 09 2020	Oct	2020	Oct-2020	plastic
9077056	plastic	-0.23625855	NZ	Fri Oct 09 2020	Oct	2020	Oct-2020	cigarette
9077055	cigarette	-0.23625855	NZ	Fri Oct 09 2020	Oct	2020	Oct-2020	aluminum	can
9077054	aluminum, can	-0.236258168	NZ	Fri Oct 09 2020	Oct	2020	Oct-2020	aluminum	can
9077053	aluminum, can	-0.236258137	NZ	Fri Oct 09 2020	Oct	2020	Oct-2020	cigarette
9077052	cigarette	-0.236257911	NZ	Fri Oct 09 2020	Oct	2020	Oct-2020	cigarette
9077051	cigarette	-0.236257949	NZ	Fri Oct 09 2020	Oct	2020	Oct-2020	cigarette
9077050	cigarette	-0.236257908	NZ	Fri Oct 09 2020	Oct	2020	Oct-2020	cigarette
9077049	cigarette	-0.236258334	NZ	Fri Oct 09 2020	Oct	2020	Oct-2020	cigarette
9077048	cigarette	-0.236257896	NZ	Fri Oct 09 2020	Oct	2020	Oct-2020	cigarette
9077047	cigarette	-0.236257913	NZ	Fri Oct 09 2020	Oct	2020	Oct-2020	cigarette
9077045	cigarette	-0.236257929	NZ	Fri Oct 09 2020	Oct	2020	Oct-2020	cigarette
9077044	cigarette	-0.236257932	NZ	Fri Oct 09 2020	Oct	2020	Oct-2020	cigarette
9077043	cigarette	-0.236257939	NZ	Fri Oct 09 2020	Oct	2020	Oct-2020	cigarette
9077042	cigarette	-0.236257948	NZ	Fri Oct 09 2020	Oct	2020	Oct-2020	cigarette
9077041	cigarette	-0.236257922	NZ	Fri Oct 09 2020	Oct	2020	Oct-2020	cigarette
9077040	cigarette	-0.236257956	NZ	Fri Oct 09 2020	Oct	2020	Oct-2020	cigarette
9077039	cigarette	-0.23625791	NZ	Fri Oct 09 2020	Oct	2020	Oct-2020	cigarette
9077038	cigarette	-0.236258091	NZ	Fri Oct 09 2020	Oct	2020	Oct-2020	cigarette
9077037	cigarette	-0.236258071	NZ	Fri Oct 09 2020	Oct	2020	Oct-2020	cigarette
9077036	cigarette	-0.236258049	NZ	Fri Oct 09 2020	Oct	2020	Oct-2020	cigarette
9077035	cigarette	-0.236258082	NZ	Fri Oct 09 2020	Oct	2020	Oct-2020	cigarette
9077034	cigarette	-0.236258051	NZ	Fri Oct 09 2020	Oct	2020	Oct-2020	plastic	cigarette
9077033	plastic, cigarette	-0.236258059	NZ	Fri Oct 09 2020	Oct	2020	Oct-2020	cigarette
9077032	cigarette	-0.236258047	NZ	Fri Oct 09 2020	Oct	2020	Oct-2020	cigarette
9077031	cigarette	-0.236257813	NZ	Fri Oct 09 2020	Oct	2020	Oct-2020	cigarette
9077030	cigarette	-0.236257857	NZ	Fri Oct 09 2020	Oct	2020	Oct-2020	cigarette
9077029	cigarette	-0.236258086	NZ	Fri Oct 09 2020	Oct	2020	Oct-2020	cigarette
9077028	cigarette	-0.236258041	NZ	Fri Oct 09 2020	Oct	2020	Oct-2020	cigarette
9077027	cigarette	-0.236258041	NZ	Fri Oct 09 2020	Oct	2020	Oct-2020	cigarette
9077026	cigarette	-0.236258086	NZ	Fri Oct 09 2020	Oct	2020	Oct-2020	cigarette
9077025	cigarette	-0.236257889	NZ	Fri Oct 09 2020	Oct	2020	Oct-2020	plastic
9077024	plastic	-0.23625809	NZ	Fri Oct 09 2020	Oct	2020	Oct-2020	cigarette
9077023	cigarette	-0.236258053	NZ	Fri Oct 09 2020	Oct	2020	Oct-2020	plastic
9077022	plastic	-0.236258225	NZ	Fri Oct 09 2020	Oct	2020	Oct-2020	cigarette
9077021	cigarette	-0.236257981	NZ	Fri Oct 09 2020	Oct	2020	Oct-2020	cigarette
9077020	cigarette	-0.236258181	NZ	Fri Oct 09 2020	Oct	2020	Oct-2020	cigarette
9077019	cigarette	-0.236258014	NZ	Fri Oct 09 2020	Oct	2020	Oct-2020	cigarette
9077018	cigarette	-0.236258046	NZ	Fri Oct 09 2020	Oct	2020	Oct-2020	cigarette
9077017	cigarette	-0.236257996	NZ	Fri Oct 09 2020	Oct	2020	Oct-2020	cigarette
9077016	cigarette	-0.236258052	NZ	Fri Oct 09 2020	Oct	2020	Oct-2020	cigarette
9077015	cigarette	-0.236258258	NZ	Fri Oct 09 2020	Oct	2020	Oct-2020	cigarette
9077014	cigarette	-0.236258055	NZ	Fri Oct 09 2020	Oct	2020	Oct-2020	cigarette
9077013	cigarette	-0.236258055	NZ	Fri Oct 09 2020	Oct	2020	Oct-2020	cigarette
9077012	cigarette	-0.23625796	NZ	Fri Oct 09 2020	Oct	2020	Oct-2020	cigarette
9077011	cigarette	-0.23625793	NZ	Fri Oct 09 2020	Oct	2020	Oct-2020	cigarette
9077010	cigarette	-0.236258059	NZ	Fri Oct 09 2020	Oct	2020	Oct-2020	cigarette
9077009	cigarette	-0.23625798	NZ	Fri Oct 09 2020	Oct	2020	Oct-2020	cigarette
9077008	cigarette	-0.236258263	NZ	Fri Oct 09 2020	Oct	2020	Oct-2020	cigarette
9077007	cigarette	-0.236258282	NZ	Fri Oct 09 2020	Oct	2020	Oct-2020	cigarette
9077006	cigarette	-0.236258282	NZ	Fri Oct 09 2020	Oct	2020	Oct-2020	cigarette
9077005	cigarette	-0.236258165	NZ	Fri Oct 09 2020	Oct	2020	Oct-2020	cigarette
9077004	cigarette	-0.236258271	NZ	Fri Oct 09 2020	Oct	2020	Oct-2020	cigarette
9077003	cigarette	-0.236258282	NZ	Fri Oct 09 2020	Oct	2020	Oct-2020	cigarette
9077002	cigarette	-0.236258255	NZ	Fri Oct 09 2020	Oct	2020	Oct-2020	cigarette
9077001	cigarette	-0.236258162	NZ	Fri Oct 09 2020	Oct	2020	Oct-2020	cigarette
9077000	cigarette	-0.236258273	NZ	Fri Oct 09 2020	Oct	2020	Oct-2020	cigarette
9076999	cigarette	-0.236258149	NZ	Fri Oct 09 2020	Oct	2020	Oct-2020	cigarette
9076998	cigarette	-0.236258247	NZ	Fri Oct 09 2020	Oct	2020	Oct-2020	cigarette
9076997	cigarette	-0.236258187	NZ	Fri Oct 09 2020	Oct	2020	Oct-2020	cigarette
9076996	cigarette	-0.236258193	NZ	Fri Oct 09 2020	Oct	2020	Oct-2020	cigarette
9076995	cigarette	-0.236258187	NZ	Fri Oct 09 2020	Oct	2020	Oct-2020	plastic
9076994	plastic	-0.236258248	NZ	Fri Oct 09 2020	Oct	2020	Oct-2020	cigarette
9076993	cigarette	-0.236258269	NZ	Fri Oct 09 2020	Oct	2020	Oct-2020	plastic	cigarette
9076992	plastic, cigarette	-0.236258253	NZ	Fri Oct 09 2020	Oct	2020	Oct-2020	cigarette
9076991	cigarette	-0.23625824	NZ	Fri Oct 09 2020	Oct	2020	Oct-2020	cigarette
9076990	cigarette	-0.236258386	NZ	Fri Oct 09 2020	Oct	2020	Oct-2020	cigarette
9076989	cigarette	-0.236258231	NZ	Fri Oct 09 2020	Oct	2020	Oct-2020	cigarette
9076988	cigarette	-0.236258386	NZ	Fri Oct 09 2020	Oct	2020	Oct-2020	cigarette
9076987	cigarette	-0.236258403	NZ	Fri Oct 09 2020	Oct	2020	Oct-2020	cigarette
9076986	cigarette	-0.236258316	NZ	Fri Oct 09 2020	Oct	2020	Oct-2020	cigarette
9076985	cigarette	-0.236258242	NZ	Fri Oct 09 2020	Oct	2020	Oct-2020	cigarette
9076984	cigarette	-0.236258242	NZ	Fri Oct 09 2020	Oct	2020	Oct-2020	cigarette
9076983	cigarette	-0.236258419	NZ	Fri Oct 09 2020	Oct	2020	Oct-2020	cigarette
9076982	cigarette	-0.236258472	NZ	Fri Oct 09 2020	Oct	2020	Oct-2020	paper
9076981	paper	-0.236258431	NZ	Fri Oct 09 2020	Oct	2020	Oct-2020	cigarette
9076980	cigarette	-0.236258403	NZ	Fri Oct 09 2020	Oct	2020	Oct-2020	aluminum	riptop
9076979	aluminum, riptop	-0.236258472	NZ	Fri Oct 09 2020	Oct	2020	Oct-2020	paper
9076978	paper	-0.236258357	NZ	Fri Oct 09 2020	Oct	2020	Oct-2020	cigarette
9076977	cigarette	-0.236258633	NZ	Fri Oct 09 2020	Oct	2020	Oct-2020	cigarette
9076976	cigarette	-0.23625832	NZ	Fri Oct 09 2020	Oct	2020	Oct-2020	cigarette
9076975	cigarette	-0.236258383	NZ	Fri Oct 09 2020	Oct	2020	Oct-2020	paper
9076974	paper	-0.236258216	NZ	Fri Oct 09 2020	Oct	2020	Oct-2020	paper
9076973	paper	-0.236258543	NZ	Fri Oct 09 2020	Oct	2020	Oct-2020	cigarette
9076972	cigarette	-0.236258407	NZ	Fri Oct 09 2020	Oct	2020	Oct-2020	cardboard
9076971	cardboard	-0.236258753	NZ	Fri Oct 09 2020	Oct	2020	Oct-2020	aluminum	can
9076970	aluminum, can	-0.23625858	NZ	Fri Oct 09 2020	Oct	2020	Oct-2020	cigarette
9076969	cigarette	-0.236258603	NZ	Fri Oct 09 2020	Oct	2020	Oct-2020	bottlecap	metal
9076968	bottlecap, metal	-0.236258506	NZ	Fri Oct 09 2020	Oct	2020	Oct-2020	cigarette
9076967	cigarette	-0.236258129	NZ	Fri Oct 09 2020	Oct	2020	Oct-2020	chewinggum
9076966	chewinggum	-0.23625845	NZ	Fri Oct 09 2020	Oct	2020	Oct-2020	bottlecap	metal
9076965	bottlecap, metal	-0.236258597	NZ	Fri Oct 09 2020	Oct	2020	Oct-2020	cigarette
9076964	cigarette	-0.236258597	NZ	Fri Oct 09 2020	Oct	2020	Oct-2020	cigarette
9076963	cigarette	-0.236250242	NZ	Fri Oct 09 2020	Oct	2020	Oct-2020	paper
9076962	paper	-0.236250043	NZ	Fri Oct 09 2020	Oct	2020	Oct-2020	plastic
9076961	plastic	-0.236257169	NZ	Fri Oct 09 2020	Oct	2020	Oct-2020	paper
9076960	paper	-0.23625073	NZ	Fri Oct 09 2020	Oct	2020	Oct-2020	glove
9076959	glove	-0.236249292	NZ	Fri Oct 09 2020	Oct	2020	Oct-2020	plastic	bottle
9076958	plastic, bottle	-0.236258613	NZ	Fri Oct 09 2020	Oct	2020	Oct-2020	cigarette
9076957	cigarette	-0.236258616	NZ	Fri Oct 09 2020	Oct	2020	Oct-2020	cigarette
9076956	cigarette	-0.23625864	NZ	Fri Oct 09 2020	Oct	2020	Oct-2020	paper
9076955	paper	-0.236249512	NZ	Fri Oct 09 2020	Oct	2020	Oct-2020	cigarette
9076954	cigarette	-0.236249619	NZ	Fri Oct 09 2020	Oct	2020	Oct-2020	bottlecap	plastic
9076953	bottlecap, plastic	-0.236251571	NZ	Fri Oct 09 2020	Oct	2020	Oct-2020	cigarette	plastic
9076952	cigarette, plastic	-0.236250124	NZ	Fri Oct 09 2020	Oct	2020	Oct-2020	cigarette	plastic
9076951	cigarette, plastic	-0.23625686	NZ	Fri Oct 09 2020	Oct	2020	Oct-2020	cigarette
9076950	cigarette	-0.236249301	NZ	Fri Oct 09 2020	Oct	2020	Oct-2020	cigarette
9076949	cigarette	-0.236258406	NZ	Fri Oct 09 2020	Oct	2020	Oct-2020	paper
9076948	paper	-0.236248964	NZ	Fri Oct 09 2020	Oct	2020	Oct-2020	cigarette
9076947	cigarette	-0.236248622	NZ	Fri Oct 09 2020	Oct	2020	Oct-2020	cigarette
9076946	cigarette	-0.236247041	NZ	Fri Oct 09 2020	Oct	2020	Oct-2020	cigarette
9076945	cigarette	-0.236246615	NZ	Fri Oct 09 2020	Oct	2020	Oct-2020	cigarette
9076944	cigarette	-0.236249243	NZ	Fri Oct 09 2020	Oct	2020	Oct-2020	cigarette
9076943	cigarette	-0.236246816	NZ	Fri Oct 09 2020	Oct	2020	Oct-2020	plastic
9076942	plastic	-0.236244539	NZ	Fri Oct 09 2020	Oct	2020	Oct-2020	bottlecap	metal
9076941	bottlecap, metal	-0.236246778	NZ	Fri Oct 09 2020	Oct	2020	Oct-2020	aluminum	can
9076940	aluminum, can	-0.23624426	NZ	Fri Oct 09 2020	Oct	2020	Oct-2020	paper
9076939	paper	-0.236248636	NZ	Fri Oct 09 2020	Oct	2020	Oct-2020	cigarette
9076938	cigarette	-0.236248201	NZ	Fri Oct 09 2020	Oct	2020	Oct-2020	paper
9076937	paper	-0.236244322	NZ	Fri Oct 09 2020	Oct	2020	Oct-2020	plastic
9076936	plastic	-0.236244871	NZ	Fri Oct 09 2020	Oct	2020	Oct-2020	cigarette
9076935	cigarette	-0.236246697	NZ	Fri Oct 09 2020	Oct	2020	Oct-2020	cigarette
9076934	cigarette	-0.236244707	NZ	Fri Oct 09 2020	Oct	2020	Oct-2020	cigarette
9076933	cigarette	-0.236244387	NZ	Fri Oct 09 2020	Oct	2020	Oct-2020	plastic
9076932	plastic	-0.236244035	NZ	Fri Oct 09 2020	Oct	2020	Oct-2020	cigarette
9076931	cigarette	-0.236244148	NZ	Fri Oct 09 2020	Oct	2020	Oct-2020	cigarette
9076930	cigarette	-0.236243947	NZ	Fri Oct 09 2020	Oct	2020	Oct-2020	cigarette
9076929	cigarette	-0.236243899	NZ	Fri Oct 09 2020	Oct	2020	Oct-2020	cigarette
9076928	cigarette	-0.236243942	NZ	Fri Oct 09 2020	Oct	2020	Oct-2020	cigarette
9076927	cigarette	-0.236244106	NZ	Fri Oct 09 2020	Oct	2020	Oct-2020	aluminum	can
9076926	aluminum, can	-0.236244227	NZ	Fri Oct 09 2020	Oct	2020	Oct-2020	cigarette
9076925	cigarette	-0.236244054	NZ	Fri Oct 09 2020	Oct	2020	Oct-2020	cigarette
9076924	cigarette	-0.236244042	NZ	Fri Oct 09 2020	Oct	2020	Oct-2020	cigarette
9076923	cigarette	-0.236244467	NZ	Fri Oct 09 2020	Oct	2020	Oct-2020	cigarette
9076922	cigarette	-0.236243487	NZ	Fri Oct 09 2020	Oct	2020	Oct-2020	cigarette
9076921	cigarette	-0.236244025	NZ	Fri Oct 09 2020	Oct	2020	Oct-2020	cigarette
9076920	cigarette	-0.236243282	NZ	Fri Oct 09 2020	Oct	2020	Oct-2020	cigarette	plastic
9076919	cigarette, plastic	-0.236243102	NZ	Fri Oct 09 2020	Oct	2020	Oct-2020	paper
9076918	paper	-0.236246738	NZ	Fri Oct 09 2020	Oct	2020	Oct-2020	paper
9076917	paper	-0.236244014	NZ	Fri Oct 09 2020	Oct	2020	Oct-2020	plastic	cigarette
9076916	plastic, cigarette	-0.236244364	NZ	Fri Oct 09 2020	Oct	2020	Oct-2020	cigarette
9076915	cigarette	-0.236244274	NZ	Fri Oct 09 2020	Oct	2020	Oct-2020	plastic
9076914	plastic	-0.236244061	NZ	Fri Oct 09 2020	Oct	2020	Oct-2020	cigarette
9076913	cigarette	-0.236244171	NZ	Fri Oct 09 2020	Oct	2020	Oct-2020	plastic
9076912	plastic	-0.23624678	NZ	Fri Oct 09 2020	Oct	2020	Oct-2020	cigarette
9076911	cigarette	-0.23624437	NZ	Fri Oct 09 2020	Oct	2020	Oct-2020	plastic
9076910	plastic	-0.236248997	NZ	Fri Oct 09 2020	Oct	2020	Oct-2020	cigarette
9076909	cigarette	-0.236246248	NZ	Fri Oct 09 2020	Oct	2020	Oct-2020	paper
9076908	paper	-0.236246025	NZ	Fri Oct 09 2020	Oct	2020	Oct-2020	cigarette
9076907	cigarette	-0.236245079	NZ	Fri Oct 09 2020	Oct	2020	Oct-2020	cigarette
9076906	cigarette	-0.236244498	NZ	Fri Oct 09 2020	Oct	2020	Oct-2020	paper
9076905	paper	-0.236245991	NZ	Fri Oct 09 2020	Oct	2020	Oct-2020	cigarette
9076904	cigarette	-0.236245263	NZ	Fri Oct 09 2020	Oct	2020	Oct-2020	plastic	clingwrap
9076195	plastic, clingwrap	-0.211534831	NZ	Fri Oct 09 2020	Oct	2020	Oct-2020	plastic	cigarette
9076194	plastic, cigarette	-0.211539607	NZ	Fri Oct 09 2020	Oct	2020	Oct-2020	plastic	straw
9076193	plastic, straw	-0.211539572	NZ	Fri Oct 09 2020	Oct	2020	Oct-2020	plastic
9076192	plastic	-0.211539765	NZ	Fri Oct 09 2020	Oct	2020	Oct-2020	plastic	wrapper
9076191	plastic, wrapper	-0.21153957	NZ	Fri Oct 09 2020	Oct	2020	Oct-2020	bottle	cocacola	plastic
9076190	bottle, cocacola, plastic	-0.211539146	NZ	Fri Oct 09 2020	Oct	2020	Oct-2020	plastic	facemask
9076189	plastic, facemask	-0.211539207	NZ	Fri Oct 09 2020	Oct	2020	Oct-2020	plastic	straw
9076188	plastic, straw	-0.211539882	NZ	Fri Oct 09 2020	Oct	2020	Oct-2020	cup	plastic	lid straw
9076187	cup, plastic, lid straw	-0.211539758	NZ	Fri Oct 09 2020	Oct	2020	Oct-2020	plastic
9076186	plastic	-0.2115398	NZ	Fri Oct 09 2020	Oct	2020	Oct-2020	plastic	straw
9076185	plastic, straw	-0.211539892	NZ	Fri Oct 09 2020	Oct	2020	Oct-2020	plastic	lid
9076184	plastic, lid	-0.211540483	NZ	Fri Oct 09 2020	Oct	2020	Oct-2020	paper
9076183	paper	-0.211539992	NZ	Fri Oct 09 2020	Oct	2020	Oct-2020	plastic	soysauce fish
9076182	plastic, soysauce fish	-0.211540306	NZ	Fri Oct 09 2020	Oct	2020	Oct-2020	plastic
9076181	plastic	-0.211540451	NZ	Fri Oct 09 2020	Oct	2020	Oct-2020	plastic	pen
9076180	plastic, pen	-0.211540282	NZ	Fri Oct 09 2020	Oct	2020	Oct-2020	plastic	lid
9076179	plastic, lid	-0.211540178	NZ	Fri Oct 09 2020	Oct	2020	Oct-2020	plastic	strawwrapper
9076178	plastic, strawwrapper	-0.211540443	NZ	Fri Oct 09 2020	Oct	2020	Oct-2020	plastic	lid
9076177	plastic, lid	-0.211541107	NZ	Fri Oct 09 2020	Oct	2020	Oct-2020	paper
9076176	paper	-0.211541291	NZ	Fri Oct 09 2020	Oct	2020	Oct-2020	plastic	cigarette	cigarettepack
9076175	plastic, cigarette, cigarettepack	-0.211542102	NZ	Fri Oct 09 2020	Oct	2020	Oct-2020	aluminum	can
9076174	aluminum, can	-0.211541794	NZ	Fri Oct 09 2020	Oct	2020	Oct-2020	plastic	coathanger
9076173	plastic, coathanger	-0.211542102	NZ	Fri Oct 09 2020	Oct	2020	Oct-2020	plastic	bottlecap
9076172	plastic, bottlecap	-0.211541654	NZ	Fri Oct 09 2020	Oct	2020	Oct-2020	plastic	soysauce fish
9076171	plastic, soysauce fish	-0.211541692	NZ	Fri Oct 09 2020	Oct	2020	Oct-2020	metal	bottlecap
9076170	metal, bottlecap	-0.211541854	NZ	Fri Oct 09 2020	Oct	2020	Oct-2020	plastic	wrapper
9076169	plastic, wrapper	-0.211541269	NZ	Fri Oct 09 2020	Oct	2020	Oct-2020	plastic	bottlecap
9076168	plastic, bottlecap	-0.211541191	NZ	Fri Oct 09 2020	Oct	2020	Oct-2020	plastic
9076167	plastic	-0.211541354	NZ	Fri Oct 09 2020	Oct	2020	Oct-2020	plastic	cigarette	cigarettepack
9076166	plastic, cigarette, cigarettepack	-0.211541022	NZ	Fri Oct 09 2020	Oct	2020	Oct-2020	plastic	wrapper
9076165	plastic, wrapper	-0.211540318	NZ	Fri Oct 09 2020	Oct	2020	Oct-2020	cup
9076164	cup	-0.21154189	NZ	Fri Oct 09 2020	Oct	2020	Oct-2020	plastic	wrapper
9076163	plastic, wrapper	-0.211538368	NZ	Fri Oct 09 2020	Oct	2020	Oct-2020	plastic	wrapper
9076162	plastic, wrapper	-0.211538342	NZ	Fri Oct 09 2020	Oct	2020	Oct-2020	plastic	piece
9076161	plastic, piece	-0.211540146	NZ	Fri Oct 09 2020	Oct	2020	Oct-2020	plastic	lid
9076160	plastic, lid	-0.211538667	NZ	Fri Oct 09 2020	Oct	2020	Oct-2020	plastic	wrapper
9076159	plastic, wrapper	-0.21154068	NZ	Fri Oct 09 2020	Oct	2020	Oct-2020	plastic	piece
9076158	plastic, piece	-0.211540195	NZ	Fri Oct 09 2020	Oct	2020	Oct-2020	polystyrene
9076157	polystyrene	-0.211539229	NZ	Fri Oct 09 2020	Oct	2020	Oct-2020	plastic	lid
9076156	plastic, lid	-0.211538667	NZ	Fri Oct 09 2020	Oct	2020	Oct-2020	plastic	cigarette	cigarettepack
9076155	plastic, cigarette, cigarettepack	-0.211539702	NZ	Fri Oct 09 2020	Oct	2020	Oct-2020	polystyrene
9076154	polystyrene	-0.211539251	NZ	Fri Oct 09 2020	Oct	2020	Oct-2020	plastic	wrapper
9076153	plastic, wrapper	-0.211538368	NZ	Fri Oct 09 2020	Oct	2020	Oct-2020	plastic	wrapper
9076152	plastic, wrapper	-0.211538254	NZ	Fri Oct 09 2020	Oct	2020	Oct-2020	plastic	wrapper
9076151	plastic, wrapper	-0.211538254	NZ	Fri Oct 09 2020	Oct	2020	Oct-2020	plastic	piece
9076150	plastic, piece	-0.21154068	NZ	Fri Oct 09 2020	Oct	2020	Oct-2020	plastic	piece
9076149	plastic, piece	-0.211538381	NZ	Fri Oct 09 2020	Oct	2020	Oct-2020	plastic	piece
9076148	plastic, piece	-0.211538472	NZ	Fri Oct 09 2020	Oct	2020	Oct-2020	plastic	breadclip
9076147	plastic, breadclip	-0.211538694	NZ	Fri Oct 09 2020	Oct	2020	Oct-2020	plastic	piece
9076146	plastic, piece	-0.211538479	NZ	Fri Oct 09 2020	Oct	2020	Oct-2020	plastic	piece
9076145	plastic, piece	-0.211538361	NZ	Fri Oct 09 2020	Oct	2020	Oct-2020	plastic	piece
9076144	plastic, piece	-0.211538361	NZ	Fri Oct 09 2020	Oct	2020	Oct-2020	plastic	piece
9076143	plastic, piece	-0.2115384	NZ	Fri Oct 09 2020	Oct	2020	Oct-2020	plastic	wrapper
9076142	plastic, wrapper	-0.211537423	NZ	Fri Oct 09 2020	Oct	2020	Oct-2020	cup	plastic	straw
9076141	cup, plastic, straw	-0.211537784	NZ	Fri Oct 09 2020	Oct	2020	Oct-2020	polystyrene
9076140	polystyrene	-0.211537728	NZ	Fri Oct 09 2020	Oct	2020	Oct-2020	plastic	piece
9076139	plastic, piece	-0.211538233	NZ	Fri Oct 09 2020	Oct	2020	Oct-2020	plastic	piece
9076138	plastic, piece	-0.211538222	NZ	Fri Oct 09 2020	Oct	2020	Oct-2020	lid	plastic	straw
9076137	lid, plastic, straw	-0.211537825	NZ	Fri Oct 09 2020	Oct	2020	Oct-2020	plastic	piece
9076136	plastic, piece	-0.211538189	NZ	Fri Oct 09 2020	Oct	2020	Oct-2020	plastic	wrapper
9076135	plastic, wrapper	-0.211538277	NZ	Fri Oct 09 2020	Oct	2020	Oct-2020	plastic	piece
9076134	plastic, piece	-0.211534361	NZ	Fri Oct 09 2020	Oct	2020	Oct-2020	plastic
9076133	plastic	-0.211537314	NZ	Fri Oct 09 2020	Oct	2020	Oct-2020	paper
9076132	paper	-0.211536291	NZ	Fri Oct 09 2020	Oct	2020	Oct-2020	plastic	wrapper
9076131	plastic, wrapper	-0.211536089	NZ	Fri Oct 09 2020	Oct	2020	Oct-2020	plastic	wrapper
9076130	plastic, wrapper	-0.211537114	NZ	Fri Oct 09 2020	Oct	2020	Oct-2020	plastic	covidcleanup
9076129	plastic, covidcleanup	-0.211535684	NZ	Fri Oct 09 2020	Oct	2020	Oct-2020	plastic	straw
9076128	plastic, straw	-0.211536582	NZ	Fri Oct 09 2020	Oct	2020	Oct-2020	plastic	wrapper
9076127	plastic, wrapper	-0.211532823	NZ	Fri Oct 09 2020	Oct	2020	Oct-2020	piece	plastic
9076126	piece, plastic	-0.211535281	NZ	Fri Oct 09 2020	Oct	2020	Oct-2020	paper
9076125	paper	-0.211535661	NZ	Fri Oct 09 2020	Oct	2020	Oct-2020	plastic	straw
9076124	plastic, straw	-0.211532802	NZ	Fri Oct 09 2020	Oct	2020	Oct-2020	plastic	lid
9076123	plastic, lid	-0.211532823	NZ	Fri Oct 09 2020	Oct	2020	Oct-2020	plastic
9076122	plastic	-0.21153295	NZ	Fri Oct 09 2020	Oct	2020	Oct-2020	plastic	wrapper
9076121	plastic, wrapper	-0.211532734	NZ	Fri Oct 09 2020	Oct	2020	Oct-2020	plastic	coathanger
9076120	plastic, coathanger	-0.211534635	NZ	Fri Oct 09 2020	Oct	2020	Oct-2020	plastic	wrapper
9076119	plastic, wrapper	-0.211531313	NZ	Fri Oct 09 2020	Oct	2020	Oct-2020	plastic	lid
9076118	plastic, lid	-0.211530887	NZ	Fri Oct 09 2020	Oct	2020	Oct-2020	plastic
9076117	plastic	-0.211531198	NZ	Fri Oct 09 2020	Oct	2020	Oct-2020	metal	bottlecap
9076116	metal, bottlecap	-0.211531122	NZ	Fri Oct 09 2020	Oct	2020	Oct-2020	plastic	lid
9076115	plastic, lid	-0.211531749	NZ	Fri Oct 09 2020	Oct	2020	Oct-2020	plastic	wrapper
9076114	plastic, wrapper	-0.211531745	NZ	Fri Oct 09 2020	Oct	2020	Oct-2020	plastic	wrapper
9076113	plastic, wrapper	-0.21153155	NZ	Fri Oct 09 2020	Oct	2020	Oct-2020	plastic
9076112	plastic	-0.211531111	NZ	Fri Oct 09 2020	Oct	2020	Oct-2020	piece	plastic
9076111	piece, plastic	-0.211532004	NZ	Fri Oct 09 2020	Oct	2020	Oct-2020	plastic	clingwrap
9076110	plastic, clingwrap	-0.211531638	NZ	Fri Oct 09 2020	Oct	2020	Oct-2020	plastic	wrapper
9076109	plastic, wrapper	-0.21153108	NZ	Fri Oct 09 2020	Oct	2020	Oct-2020	plastic	wrapper
9076108	plastic, wrapper	-0.211531183	NZ	Fri Oct 09 2020	Oct	2020	Oct-2020	plastic	lid
9076107	plastic, lid	-0.211530838	NZ	Fri Oct 09 2020	Oct	2020	Oct-2020	plastic	straw
9076106	plastic, straw	-0.211531595	NZ	Fri Oct 09 2020	Oct	2020	Oct-2020	plastic	wrapper
9076105	plastic, wrapper	-0.211531327	NZ	Fri Oct 09 2020	Oct	2020	Oct-2020	plastic	wrapper
9076104	plastic, wrapper	-0.21153074	NZ	Fri Oct 09 2020	Oct	2020	Oct-2020	plastic	lid
9076103	plastic, lid	-0.211527834	NZ	Fri Oct 09 2020	Oct	2020	Oct-2020	plastic	cheesewrapper
9076102	plastic, cheesewrapper	-0.211526104	NZ	Fri Oct 09 2020	Oct	2020	Oct-2020	plastic	straw
9076101	plastic, straw	-0.211530555	NZ	Fri Oct 09 2020	Oct	2020	Oct-2020	plastic	wrapper
9076100	plastic, wrapper	-0.211530577	NZ	Fri Oct 09 2020	Oct	2020	Oct-2020	plastic	cup
9076099	plastic, cup	-0.211530492	NZ	Fri Oct 09 2020	Oct	2020	Oct-2020	bottle	plastic	water
9076098	bottle, plastic, water	-0.211526104	NZ	Fri Oct 09 2020	Oct	2020	Oct-2020	paper
9076097	paper	-0.211526104	NZ	Fri Oct 09 2020	Oct	2020	Oct-2020	aluminum	can
9076096	aluminum, can	-0.211526056	NZ	Fri Oct 09 2020	Oct	2020	Oct-2020	cup	plastic	lid
9076095	cup, plastic, lid	-0.211525709	NZ	Fri Oct 09 2020	Oct	2020	Oct-2020	plastic	straw
9076094	plastic, straw	-0.211525851	NZ	Fri Oct 09 2020	Oct	2020	Oct-2020	plastic	cigarette	cigarettepack
9076093	plastic, cigarette, cigarettepack	-0.211527194	NZ	Fri Oct 09 2020	Oct	2020	Oct-2020	plastic	soysauce fish
9076092	plastic, soysauce fish	-0.211526335	NZ	Fri Oct 09 2020	Oct	2020	Oct-2020	plastic	card
9076091	plastic, card	-0.211526431	NZ	Fri Oct 09 2020	Oct	2020	Oct-2020	aluminum	can
9076090	aluminum, can	-0.21152779	NZ	Fri Oct 09 2020	Oct	2020	Oct-2020	piece	plastic
9075942	piece, plastic	-0.211526061	NZ	Fri Oct 09 2020	Oct	2020	Oct-2020	plastic
9075941	plastic	-0.211526093	NZ	Fri Oct 09 2020	Oct	2020	Oct-2020	plastic	wrapper
9075940	plastic, wrapper	-0.211526093	NZ	Fri Oct 09 2020	Oct	2020	Oct-2020	mcdonalds	cardboard
9075939	mcdonalds, cardboard	-0.211526223	NZ	Fri Oct 09 2020	Oct	2020	Oct-2020	plastic	wrapper
9075938	plastic, wrapper	-0.211526125	NZ	Fri Oct 09 2020	Oct	2020	Oct-2020	plastic	wrapper
9075937	plastic, wrapper	-0.211526125	NZ	Fri Oct 09 2020	Oct	2020	Oct-2020	plastic	wrapper
9075936	plastic, wrapper	-0.211526223	NZ	Fri Oct 09 2020	Oct	2020	Oct-2020	plastic	lid
9075935	plastic, lid	-0.211526223	NZ	Fri Oct 09 2020	Oct	2020	Oct-2020	plastic	straw
9075934	plastic, straw	-0.211526223	NZ	Fri Oct 09 2020	Oct	2020	Oct-2020	plastic	straw
9075933	plastic, straw	-0.211526223	NZ	Fri Oct 09 2020	Oct	2020	Oct-2020	plastic	cup
9075932	plastic, cup	-0.211526313	NZ	Fri Oct 09 2020	Oct	2020	Oct-2020	plastic
9075931	plastic	-0.211527511	NZ	Fri Oct 09 2020	Oct	2020	Oct-2020	plastic
9075930	plastic	-0.211527521	NZ	Fri Oct 09 2020	Oct	2020	Oct-2020	plastic
9075929	plastic	-0.211527511	NZ	Fri Oct 09 2020	Oct	2020	Oct-2020	plastic
9075928	plastic	-0.21152718	NZ	Fri Oct 09 2020	Oct	2020	Oct-2020	plastic	facemask
9075927	plastic, facemask	-0.211527237	NZ	Fri Oct 09 2020	Oct	2020	Oct-2020	paper
9075926	paper	-0.211527546	NZ	Fri Oct 09 2020	Oct	2020	Oct-2020	aluminum	can
9075925	aluminum, can	-0.211527347	NZ	Fri Oct 09 2020	Oct	2020	Oct-2020	plastic	cup
9075924	plastic, cup	-0.211527525	NZ	Fri Oct 09 2020	Oct	2020	Oct-2020	plastic	wrapper
9075923	plastic, wrapper	-0.211527517	NZ	Fri Oct 09 2020	Oct	2020	Oct-2020	plastic
9075922	plastic	-0.211527534	NZ	Fri Oct 09 2020	Oct	2020	Oct-2020	plastic	wrapper
9075921	plastic, wrapper	-0.211527521	NZ	Fri Oct 09 2020	Oct	2020	Oct-2020	plastic	lid
9075920	plastic, lid	-0.211527489	NZ	Fri Oct 09 2020	Oct	2020	Oct-2020	plastic
9075919	plastic	-0.211527537	NZ	Fri Oct 09 2020	Oct	2020	Oct-2020	plastic	wrapper
9075918	plastic, wrapper	-0.21152729	NZ	Fri Oct 09 2020	Oct	2020	Oct-2020	plastic	wrapper
9075917	plastic, wrapper	-0.211527685	NZ	Fri Oct 09 2020	Oct	2020	Oct-2020	plastic
9075916	plastic	-0.211527209	NZ	Fri Oct 09 2020	Oct	2020	Oct-2020	plastic	wrapper
9075915	plastic, wrapper	-0.211527182	NZ	Fri Oct 09 2020	Oct	2020	Oct-2020	plastic	lid
9075914	plastic, lid	-0.211527198	NZ	Fri Oct 09 2020	Oct	2020	Oct-2020	drink	kfc	plastic	straw
9075913	drink, kfc, plastic, straw	-0.211529821	NZ	Fri Oct 09 2020	Oct	2020	Oct-2020	plastic	wrapper
9075912	plastic, wrapper	-0.211526818	NZ	Fri Oct 09 2020	Oct	2020	Oct-2020	plastic	straw
9075911	plastic, straw	-0.211529821	NZ	Fri Oct 09 2020	Oct	2020	Oct-2020	plastic	wrapper
9075910	plastic, wrapper	-0.211526923	NZ	Fri Oct 09 2020	Oct	2020	Oct-2020	plastic	tiewrap
9075909	plastic, tiewrap	-0.211525174	NZ	Fri Oct 09 2020	Oct	2020	Oct-2020	plastic
9075908	plastic	-0.211526923	NZ	Fri Oct 09 2020	Oct	2020	Oct-2020	plastic
9075907	plastic	-0.211526553	NZ	Fri Oct 09 2020	Oct	2020	Oct-2020	polystyrene
9075906	polystyrene	-0.211526077	NZ	Fri Oct 09 2020	Oct	2020	Oct-2020	plastic
9075905	plastic	-0.211529979	NZ	Fri Oct 09 2020	Oct	2020	Oct-2020	plastic	soysauce fish
9075904	plastic, soysauce fish	-0.211529961	NZ	Fri Oct 09 2020	Oct	2020	Oct-2020	aluminum	can
9075903	aluminum, can	-0.211526331	NZ	Fri Oct 09 2020	Oct	2020	Oct-2020	plastic	lid
9075902	plastic, lid	-0.211524089	NZ	Fri Oct 09 2020	Oct	2020	Oct-2020	plastic
9075901	plastic	-0.211528547	NZ	Fri Oct 09 2020	Oct	2020	Oct-2020	plastic
9075900	plastic	-0.211530028	NZ	Fri Oct 09 2020	Oct	2020	Oct-2020	aluminum	can
9075899	aluminum, can	-0.21153	NZ	Fri Oct 09 2020	Oct	2020	Oct-2020	plastic	lid
9075898	plastic, lid	-0.211529969	NZ	Fri Oct 09 2020	Oct	2020	Oct-2020	plastic	coffeecuplid
9075897	plastic, coffeecuplid	-0.211529884	NZ	Fri Oct 09 2020	Oct	2020	Oct-2020	candy	plastic	wrapper
9075896	candy, plastic, wrapper	-0.211530735	NZ	Fri Oct 09 2020	Oct	2020	Oct-2020	plastic
9075895	plastic	-0.211529925	NZ	Fri Oct 09 2020	Oct	2020	Oct-2020	plastic	wrapper
9075894	plastic, wrapper	-0.211529697	NZ	Fri Oct 09 2020	Oct	2020	Oct-2020	plastic	wrapper
9075893	plastic, wrapper	-0.211530563	NZ	Fri Oct 09 2020	Oct	2020	Oct-2020	plastic	wrapper
9075892	plastic, wrapper	-0.211530195	NZ	Fri Oct 09 2020	Oct	2020	Oct-2020	plastic	lid
9075891	plastic, lid	-0.211532269	NZ	Fri Oct 09 2020	Oct	2020	Oct-2020	clothingtag
9075890	clothingtag	-0.211533117	NZ	Fri Oct 09 2020	Oct	2020	Oct-2020	paper
9075889	paper	-0.21153294	NZ	Fri Oct 09 2020	Oct	2020	Oct-2020	paper
9075888	paper	-0.211531715	NZ	Fri Oct 09 2020	Oct	2020	Oct-2020	plastic	wrapper
9075887	plastic, wrapper	-0.211530774	NZ	Fri Oct 09 2020	Oct	2020	Oct-2020	paper
9075881	paper	-0.211534998	NZ	Fri Oct 09 2020	Oct	2020	Oct-2020	plastic	bottlecap
9075880	plastic, bottlecap	-0.211537537	NZ	Fri Oct 09 2020	Oct	2020	Oct-2020	plastic
9075879	plastic	-0.211534998	NZ	Fri Oct 09 2020	Oct	2020	Oct-2020	energydrink	plastic	straw
9075874	energydrink, plastic, straw	-0.236284468	NZ	Fri Oct 09 2020	Oct	2020	Oct-2020	plastic	bottlecap
9075840	plastic, bottlecap	-0.211529693	NZ	Fri Oct 09 2020	Oct	2020	Oct-2020	plastic	wrapper
9075822	plastic, wrapper	-0.211554483	NZ	Fri Oct 09 2020	Oct	2020	Oct-2020	plastic	wrapper
9075821	plastic, wrapper	-0.211554483	NZ	Fri Oct 09 2020	Oct	2020	Oct-2020	cigarette	packet	paper	straw	flat	can
9074822	cigarette, packet, paper, straw, flat, can	-0.236197014	NZ	Thu Oct 08 2020	Oct	2020	Oct-2020	plastic
9063059	plastic	-0.229812422	NZ	Wed Oct 07 2020	Oct	2020	Oct-2020	plastic	wrapper
9063058	plastic, wrapper	-0.229811753	NZ	Mon Oct 05 2020	Oct	2020	Oct-2020	cigarette	butt	plastic
9063057	cigarette, butt, plastic	-0.229812093	NZ	Mon Oct 05 2020	Oct	2020	Oct-2020	butt	celluloseacetate	cigarette
9063056	butt, celluloseacetate, cigarette	-0.229812307	NZ	Wed Oct 07 2020	Oct	2020	Oct-2020	plastic	breadbag
9063055	plastic, breadbag	-0.229813308	NZ	Tue Oct 06 2020	Oct	2020	Oct-2020	paper	receipt
9063054	paper, receipt	-0.229812085	NZ	Mon Oct 05 2020	Oct	2020	Oct-2020	butt	cigarette	plastic
9063053	butt, cigarette, plastic	-0.229812092	NZ	Mon Oct 05 2020	Oct	2020	Oct-2020	plastic	waterbottle
9063052	plastic, waterbottle	-0.22981334	NZ	Wed Oct 07 2020	Oct	2020	Oct-2020	plastic	piece
9063051	plastic, piece	-0.229812115	NZ	Mon Oct 05 2020	Oct	2020	Oct-2020	butt	cigarette	plastic
9063050	butt, cigarette, plastic	-0.22981334	NZ	Wed Oct 07 2020	Oct	2020	Oct-2020	plastic	velcro
9063049	plastic, velcro	-0.229812163	NZ	Mon Oct 05 2020	Oct	2020	Oct-2020	butt	cigarette	plastic
9063048	butt, cigarette, plastic	-0.229805693	NZ	Mon Oct 05 2020	Oct	2020	Oct-2020	butt	cigarette	plastic
9063047	butt, cigarette, plastic	-0.229805678	NZ	Mon Oct 05 2020	Oct	2020	Oct-2020	plastic	piece
9063046	plastic, piece	-0.229811497	NZ	Mon Oct 05 2020	Oct	2020	Oct-2020	butt	celluloseacetate	cigarette	plastic
9063045	butt, celluloseacetate, cigarette, plastic	-0.229805866	NZ	Mon Oct 05 2020	Oct	2020	Oct-2020	wool
9063044	wool	-0.229811967	NZ	Mon Oct 05 2020	Oct	2020	Oct-2020	butt	celluloseacetate	cigarette
9063043	butt, celluloseacetate, cigarette	-0.22980561	NZ	Mon Oct 05 2020	Oct	2020	Oct-2020	butt	celluloseacetate	cigarette	plastic
9063042	butt, celluloseacetate, cigarette, plastic	-0.229806203	NZ	Mon Oct 05 2020	Oct	2020	Oct-2020	butt	cigarette	plastic
9063041	butt, cigarette, plastic	-0.22980559	NZ	Mon Oct 05 2020	Oct	2020	Oct-2020	cigarette	plastic	butt
9063040	cigarette, plastic, butt	-0.229805927	NZ	Mon Oct 05 2020	Oct	2020	Oct-2020	bottle	glass	alcohol	db export
9063039	bottle, glass, alcohol, db export	-0.229813257	NZ	Mon Oct 05 2020	Oct	2020	Oct-2020	cigarette	plastic	butt
9063038	cigarette, plastic, butt	-0.229806205	NZ	Mon Oct 05 2020	Oct	2020	Oct-2020	cigarette	plastic	butt
9063037	cigarette, plastic, butt	-0.229805544	NZ	Mon Oct 05 2020	Oct	2020	Oct-2020	cigarette	plastic	butt
9063036	cigarette, plastic, butt	-0.229805576	NZ	Mon Oct 05 2020	Oct	2020	Oct-2020	butt	cigarette	plastic
9063035	butt, cigarette, plastic	-0.229811497	NZ	Mon Oct 05 2020	Oct	2020	Oct-2020	butt	celluloseacetate	cigarette	plastic
9063034	butt, celluloseacetate, cigarette, plastic	-0.229805877	NZ	Mon Oct 05 2020	Oct	2020	Oct-2020	cigarette	plastic	butt
9063033	cigarette, plastic, butt	-0.229805699	NZ	Mon Oct 05 2020	Oct	2020	Oct-2020	butt	cigarette	plastic
9063032	butt, cigarette, plastic	-0.229805523	NZ	Mon Oct 05 2020	Oct	2020	Oct-2020	butt	cigarette	plastic
9063031	butt, cigarette, plastic	-0.229805711	NZ	Mon Oct 05 2020	Oct	2020	Oct-2020	butt	cigarette	plastic
9063030	butt, cigarette, plastic	-0.229805716	NZ	Mon Oct 05 2020	Oct	2020	Oct-2020	butt	cigarette	plastic
9063029	butt, cigarette, plastic	-0.229805711	NZ	Mon Oct 05 2020	Oct	2020	Oct-2020	butt	cigarette	plastic
9063028	butt, cigarette, plastic	-0.229805697	NZ	Mon Oct 05 2020	Oct	2020	Oct-2020	butt	cigarette	plastic
9063027	butt, cigarette, plastic	-0.229805716	NZ	Mon Oct 05 2020	Oct	2020	Oct-2020	butt	cigarette	plastic
9063026	butt, cigarette, plastic	-0.229805492	NZ	Mon Oct 05 2020	Oct	2020	Oct-2020	butt	cigarette	plastic
9063025	butt, cigarette, plastic	-0.229805513	NZ	Mon Oct 05 2020	Oct	2020	Oct-2020	paper	wrapper	sugar
9063024	paper, wrapper, sugar	-0.229805512	NZ	Mon Oct 05 2020	Oct	2020	Oct-2020	cigarette	plastic	butt
9063023	cigarette, plastic, butt	-0.229805733	NZ	Mon Oct 05 2020	Oct	2020	Oct-2020	cigarette	plastic	butt
9063022	cigarette, plastic, butt	-0.229805722	NZ	Mon Oct 05 2020	Oct	2020	Oct-2020	plastic
9063021	plastic	-0.229805449	NZ	Mon Oct 05 2020	Oct	2020	Oct-2020	bottle	drink	plastic	cocacola
9063020	bottle, drink, plastic, cocacola	-0.229578299	NZ	Sat Oct 03 2020	Oct	2020	Oct-2020	butt	cigarette	plastic
9063019	butt, cigarette, plastic	-0.229805449	NZ	Mon Oct 05 2020	Oct	2020	Oct-2020	butt	cigarette	plastic
9063018	butt, cigarette, plastic	-0.229805499	NZ	Mon Oct 05 2020	Oct	2020	Oct-2020	icecreamstick	wood
9063017	icecreamstick, wood	-0.229581866	NZ	Sat Oct 03 2020	Oct	2020	Oct-2020	paper	wrapper
9063016	paper, wrapper	-0.229583275	NZ	Sat Oct 03 2020	Oct	2020	Oct-2020	piece	metal
9063015	piece, metal	-0.229576934	NZ	Sat Oct 03 2020	Oct	2020	Oct-2020	bag	paper
9063014	bag, paper	-0.229581836	NZ	Sat Oct 03 2020	Oct	2020	Oct-2020	plastic	rubber
9063013	plastic, rubber	-0.229583224	NZ	Sat Oct 03 2020	Oct	2020	Oct-2020	plastic
9063012	plastic	-0.229578579	NZ	Sat Oct 03 2020	Oct	2020	Oct-2020	bag	plastic
9063011	bag, plastic	-0.229585598	NZ	Sat Oct 03 2020	Oct	2020	Oct-2020	plastic
9063010	plastic	-0.229583136	NZ	Sat Oct 03 2020	Oct	2020	Oct-2020	plastic
9063009	plastic	-0.229583153	NZ	Sat Oct 03 2020	Oct	2020	Oct-2020	cigarette	plastic	butt
9063008	cigarette, plastic, butt	-0.229583343	NZ	Sat Oct 03 2020	Oct	2020	Oct-2020	paper	tag	champion
9063007	paper, tag, champion	-0.229585789	NZ	Sat Oct 03 2020	Oct	2020	Oct-2020	hankerchief	fabric
9063006	hankerchief, fabric	-0.229580657	NZ	Sat Oct 03 2020	Oct	2020	Oct-2020	bag	plastic
9063004	bag, plastic	-0.229585849	NZ	Sat Oct 03 2020	Oct	2020	Oct-2020	plastic
9063003	plastic	-0.229583011	NZ	Sat Oct 03 2020	Oct	2020	Oct-2020	plastic	straw
9060740	plastic, straw	-0.229914221	NZ	Thu Oct 08 2020	Oct	2020	Oct-2020	plastic
9060739	plastic	-0.229914989	NZ	Thu Oct 08 2020	Oct	2020	Oct-2020	metal	keyring
9060738	metal, keyring	-0.229914516	NZ	Thu Oct 08 2020	Oct	2020	Oct-2020	plastic	bottle	melloyello
9060737	plastic, bottle, melloyello	-0.229913644	NZ	Thu Oct 08 2020	Oct	2020	Oct-2020	metal	wire
9060736	metal, wire	-0.229914329	NZ	Thu Oct 08 2020	Oct	2020	Oct-2020	paper
9060735	paper	-0.229913669	NZ	Thu Oct 08 2020	Oct	2020	Oct-2020	plastic	bottlecap
9060734	plastic, bottlecap	-0.229913767	NZ	Thu Oct 08 2020	Oct	2020	Oct-2020	paper
9060733	paper	-0.229913644	NZ	Thu Oct 08 2020	Oct	2020	Oct-2020	plastic	sheet
9060732	plastic, sheet	-0.229913642	NZ	Thu Oct 08 2020	Oct	2020	Oct-2020	bottle	glass
9060731	bottle, glass	-0.229913644	NZ	Thu Oct 08 2020	Oct	2020	Oct-2020	plastic	polystyrene
9060730	plastic, polystyrene	-0.229913644	NZ	Thu Oct 08 2020	Oct	2020	Oct-2020	plastic	bag
9060729	plastic, bag	-0.229913835	NZ	Thu Oct 08 2020	Oct	2020	Oct-2020	plastic
9060728	plastic	-0.229913918	NZ	Thu Oct 08 2020	Oct	2020	Oct-2020	plastic	wrapper	moro
9060727	plastic, wrapper, moro	-0.229913644	NZ	Thu Oct 08 2020	Oct	2020	Oct-2020	paper
9060726	paper	-0.229913145	NZ	Thu Oct 08 2020	Oct	2020	Oct-2020	mcdonalds	papercup
9060725	mcdonalds, papercup	-0.229913645	NZ	Thu Oct 08 2020	Oct	2020	Oct-2020	plastic	wrapper
9060724	plastic, wrapper	-0.229913587	NZ	Thu Oct 08 2020	Oct	2020	Oct-2020	plastic	polyethylenefoam
9060723	plastic, polyethylenefoam	-0.229913662	NZ	Thu Oct 08 2020	Oct	2020	Oct-2020	plastic
9060722	plastic	-0.229912683	NZ	Thu Oct 08 2020	Oct	2020	Oct-2020	clothwipe
9060721	clothwipe	-0.229912263	NZ	Thu Oct 08 2020	Oct	2020	Oct-2020	paper
9060720	paper	-0.229913021	NZ	Thu Oct 08 2020	Oct	2020	Oct-2020	plastic	bag
9060719	plastic, bag	-0.229913655	NZ	Thu Oct 08 2020	Oct	2020	Oct-2020	foamrubber
9060718	foamrubber	-0.229913021	NZ	Thu Oct 08 2020	Oct	2020	Oct-2020	plastic
9060717	plastic	-0.229913645	NZ	Thu Oct 08 2020	Oct	2020	Oct-2020	plastic
9060716	plastic	-0.229913664	NZ	Thu Oct 08 2020	Oct	2020	Oct-2020	plastic
9060715	plastic	-0.229912263	NZ	Thu Oct 08 2020	Oct	2020	Oct-2020	plastic	bag
9060714	plastic, bag	-0.229912708	NZ	Thu Oct 08 2020	Oct	2020	Oct-2020	bag	paper
9060713	bag, paper	-0.22991307	NZ	Thu Oct 08 2020	Oct	2020	Oct-2020	plastic
9060712	plastic	-0.22991213	NZ	Thu Oct 08 2020	Oct	2020	Oct-2020	paper	bag
9060711	paper, bag	-0.229911138	NZ	Thu Oct 08 2020	Oct	2020	Oct-2020	plastic	bottle
9060710	plastic, bottle	-0.229911524	NZ	Thu Oct 08 2020	Oct	2020	Oct-2020	bag	wovenpolypropylene	ravensdown
9060709	bag, wovenpolypropylene, ravensdown	-0.229912142	NZ	Thu Oct 08 2020	Oct	2020	Oct-2020	plastic	polystyrene
9060708	plastic, polystyrene	-0.229911817	NZ	Thu Oct 08 2020	Oct	2020	Oct-2020	plastic	ziplockbag
9060707	plastic, ziplockbag	-0.229910674	NZ	Thu Oct 08 2020	Oct	2020	Oct-2020	plastic
9060706	plastic	-0.229911964	NZ	Thu Oct 08 2020	Oct	2020	Oct-2020	paper	tetrapak
9060705	paper, tetrapak	-0.229911816	NZ	Thu Oct 08 2020	Oct	2020	Oct-2020	paper
9060704	paper	-0.229912151	NZ	Thu Oct 08 2020	Oct	2020	Oct-2020	plastic
9060703	plastic	-0.229911399	NZ	Thu Oct 08 2020	Oct	2020	Oct-2020	plastic	polystyrene
9060702	plastic, polystyrene	-0.229911095	NZ	Thu Oct 08 2020	Oct	2020	Oct-2020	plastic	bag
9060701	plastic, bag	-0.22991179	NZ	Thu Oct 08 2020	Oct	2020	Oct-2020	paper
9060700	paper	-0.229911105	NZ	Thu Oct 08 2020	Oct	2020	Oct-2020	paper	tetrapak
9060699	paper, tetrapak	-0.229911524	NZ	Thu Oct 08 2020	Oct	2020	Oct-2020	straw	plastic
9060698	straw, plastic	-0.229911105	NZ	Thu Oct 08 2020	Oct	2020	Oct-2020	plastic	happybirthday
9060697	plastic, happybirthday	-0.229911095	NZ	Thu Oct 08 2020	Oct	2020	Oct-2020	paper	mcdonalds	burgerbox
9060696	paper, mcdonalds, burgerbox	-0.229909219	NZ	Thu Oct 08 2020	Oct	2020	Oct-2020	plasterboard
9060695	plasterboard	-0.229912788	NZ	Thu Oct 08 2020	Oct	2020	Oct-2020	plastic	wrapper
9060694	plastic, wrapper	-0.229909951	NZ	Thu Oct 08 2020	Oct	2020	Oct-2020	plastic	bluebird	packet
9060693	plastic, bluebird, packet	-0.229910846	NZ	Thu Oct 08 2020	Oct	2020	Oct-2020	plastic
9060692	plastic	-0.229912785	NZ	Thu Oct 08 2020	Oct	2020	Oct-2020	plastic	bag
9060691	plastic, bag	-0.229910674	NZ	Thu Oct 08 2020	Oct	2020	Oct-2020	paper	parkingticket
9060690	paper, parkingticket	-0.229909951	NZ	Thu Oct 08 2020	Oct	2020	Oct-2020	paper
9060689	paper	-0.229912943	NZ	Thu Oct 08 2020	Oct	2020	Oct-2020	paper
9060688	paper	-0.229909303	NZ	Thu Oct 08 2020	Oct	2020	Oct-2020	plasterboard
9060687	plasterboard	-0.229912823	NZ	Thu Oct 08 2020	Oct	2020	Oct-2020	plastic	plastic spoon
9060686	plastic, plastic spoon	-0.229909688	NZ	Thu Oct 08 2020	Oct	2020	Oct-2020	plastic	bottle
9060685	plastic, bottle	-0.229909604	NZ	Thu Oct 08 2020	Oct	2020	Oct-2020	paper
9060684	paper	-0.229909885	NZ	Thu Oct 08 2020	Oct	2020	Oct-2020	plastic	wrapper
9060683	plastic, wrapper	-0.229912453	NZ	Thu Oct 08 2020	Oct	2020	Oct-2020	mcdonalds	paper	burgerbox
9060682	mcdonalds, paper, burgerbox	-0.229909233	NZ	Thu Oct 08 2020	Oct	2020	Oct-2020	can	aluminum	tui beer
9060681	can, aluminum, tui beer	-0.229913199	NZ	Thu Oct 08 2020	Oct	2020	Oct-2020	glass	brokenglass
9060680	glass, brokenglass	-0.229913199	NZ	Thu Oct 08 2020	Oct	2020	Oct-2020	plastic	cigarettepack	horizon
9060679	plastic, cigarettepack, horizon	-0.229913199	NZ	Thu Oct 08 2020	Oct	2020	Oct-2020	polystyrene	plastic
9060678	polystyrene, plastic	-0.229913175	NZ	Thu Oct 08 2020	Oct	2020	Oct-2020	paper
9060677	paper	-0.229913182	NZ	Thu Oct 08 2020	Oct	2020	Oct-2020	paper	cup	burgerking
9060676	paper, cup, burgerking	-0.229913837	NZ	Thu Oct 08 2020	Oct	2020	Oct-2020	plastic	bungeecord
9060675	plastic, bungeecord	-0.229913187	NZ	Thu Oct 08 2020	Oct	2020	Oct-2020	plastic	lid
9060674	plastic, lid	-0.229913187	NZ	Thu Oct 08 2020	Oct	2020	Oct-2020	polystyrene
9060673	polystyrene	-0.229913504	NZ	Thu Oct 08 2020	Oct	2020	Oct-2020	plastic	polystyrene
9060672	plastic, polystyrene	-0.229913504	NZ	Thu Oct 08 2020	Oct	2020	Oct-2020	plastic	bottlecap
9060671	plastic, bottlecap	-0.229913239	NZ	Thu Oct 08 2020	Oct	2020	Oct-2020	paper
9060670	paper	-0.229913504	NZ	Thu Oct 08 2020	Oct	2020	Oct-2020	plastic	bottle
9060669	plastic, bottle	-0.22991372	NZ	Thu Oct 08 2020	Oct	2020	Oct-2020	can	tui beer	aluminum
9060668	can, tui beer, aluminum	-0.229913199	NZ	Thu Oct 08 2020	Oct	2020	Oct-2020	paper
9060667	paper	-0.229913836	NZ	Thu Oct 08 2020	Oct	2020	Oct-2020	plastic
9060666	plastic	-0.229914625	NZ	Thu Oct 08 2020	Oct	2020	Oct-2020	plastic	wrapper
9060665	plastic, wrapper	-0.229913831	NZ	Thu Oct 08 2020	Oct	2020	Oct-2020	paper	parkingticket
9060663	paper, parkingticket	-0.229913831	NZ	Thu Oct 08 2020	Oct	2020	Oct-2020	mcdonalds	paper	burgerbox
9060662	mcdonalds, paper, burgerbox	-0.229914626	NZ	Thu Oct 08 2020	Oct	2020	Oct-2020	mcdonalds	paper
9060661	mcdonalds, paper	-0.229914874	NZ	Thu Oct 08 2020	Oct	2020	Oct-2020	plastic	lid	mcdonalds
9060660	plastic, lid, mcdonalds	-0.229914977	NZ	Thu Oct 08 2020	Oct	2020	Oct-2020	can	7up	aluminium
9060659	can, 7up, aluminium	-0.229914915	NZ	Thu Oct 08 2020	Oct	2020	Oct-2020	paper
9060658	paper	-0.229914853	NZ	Thu Oct 08 2020	Oct	2020	Oct-2020	plastic	packet	grainwaves
9060657	plastic, packet, grainwaves	-0.229914623	NZ	Thu Oct 08 2020	Oct	2020	Oct-2020	cigarettepack	paper
9060656	cigarettepack, paper	-0.229915069	NZ	Thu Oct 08 2020	Oct	2020	Oct-2020	plastic	packet	crisppacket
9060655	plastic, packet, crisppacket	-0.229914268	NZ	Thu Oct 08 2020	Oct	2020	Oct-2020	paper	cup	burgerking
9060654	paper, cup, burgerking	-0.229913831	NZ	Thu Oct 08 2020	Oct	2020	Oct-2020	clothwipe
9060653	clothwipe	-0.229914669	NZ	Thu Oct 08 2020	Oct	2020	Oct-2020	paper	mcdonalds	fries packet
9060652	paper, mcdonalds, fries packet	-0.229914614	NZ	Thu Oct 08 2020	Oct	2020	Oct-2020	aluminum	can
9059223	aluminum, can	-0.211526662	NZ	Thu Oct 08 2020	Oct	2020	Oct-2020	plastic	wrapper
9059222	plastic, wrapper	-0.211526416	NZ	Thu Oct 08 2020	Oct	2020	Oct-2020	plastic	strawwrapper
9059221	plastic, strawwrapper	-0.211526506	NZ	Thu Oct 08 2020	Oct	2020	Oct-2020	piece	plastic
9059220	piece, plastic	-0.211526323	NZ	Thu Oct 08 2020	Oct	2020	Oct-2020	plastic	straw
9059219	plastic, straw	-0.21152748	NZ	Thu Oct 08 2020	Oct	2020	Oct-2020	plastic	wrapper
9059218	plastic, wrapper	-0.211527074	NZ	Thu Oct 08 2020	Oct	2020	Oct-2020	plastic
9059217	plastic	-0.211527302	NZ	Thu Oct 08 2020	Oct	2020	Oct-2020	plastic	wrapper
9059216	plastic, wrapper	-0.211527208	NZ	Thu Oct 08 2020	Oct	2020	Oct-2020	plastic	foodpackaging
9059215	plastic, foodpackaging	-0.211526271	NZ	Thu Oct 08 2020	Oct	2020	Oct-2020	aluminum	can
9059214	aluminum, can	-0.211527419	NZ	Thu Oct 08 2020	Oct	2020	Oct-2020	plastic	straw
9059213	plastic, straw	-0.211527451	NZ	Thu Oct 08 2020	Oct	2020	Oct-2020	plastic	wrapper
9059212	plastic, wrapper	-0.211527095	NZ	Thu Oct 08 2020	Oct	2020	Oct-2020	plastic	wrapper
9059211	plastic, wrapper	-0.211527133	NZ	Thu Oct 08 2020	Oct	2020	Oct-2020	plastic	wrapper
9059210	plastic, wrapper	-0.211527072	NZ	Thu Oct 08 2020	Oct	2020	Oct-2020	plastic	wrapper
9059209	plastic, wrapper	-0.211526915	NZ	Thu Oct 08 2020	Oct	2020	Oct-2020	plastic	wrapper
9059208	plastic, wrapper	-0.211527063	NZ	Thu Oct 08 2020	Oct	2020	Oct-2020	piece	plastic
9059207	piece, plastic	-0.21152747	NZ	Thu Oct 08 2020	Oct	2020	Oct-2020	plastic
9059206	plastic	-0.211526984	NZ	Thu Oct 08 2020	Oct	2020	Oct-2020	polystyrene
9059205	polystyrene	-0.211527299	NZ	Thu Oct 08 2020	Oct	2020	Oct-2020	plastic	wrapper
9059204	plastic, wrapper	-0.211526943	NZ	Thu Oct 08 2020	Oct	2020	Oct-2020	plastic	wrapper
9059203	plastic, wrapper	-0.211527067	NZ	Thu Oct 08 2020	Oct	2020	Oct-2020	cup	lid	mcdonalds	plastic
9059202	cup, lid, mcdonalds, plastic	-0.211527079	NZ	Thu Oct 08 2020	Oct	2020	Oct-2020	plastic	wrapper
9059201	plastic, wrapper	-0.211526909	NZ	Thu Oct 08 2020	Oct	2020	Oct-2020	plastic	wrapper
9059200	plastic, wrapper	-0.211527101	NZ	Thu Oct 08 2020	Oct	2020	Oct-2020	plastic	wrapper
9059199	plastic, wrapper	-0.211527092	NZ	Thu Oct 08 2020	Oct	2020	Oct-2020	plastic	wrapper
9059198	plastic, wrapper	-0.211527529	NZ	Thu Oct 08 2020	Oct	2020	Oct-2020	plastic	wrapper
9059197	plastic, wrapper	-0.211527102	NZ	Thu Oct 08 2020	Oct	2020	Oct-2020	plastic	wrapper
9059196	plastic, wrapper	-0.211527246	NZ	Thu Oct 08 2020	Oct	2020	Oct-2020	plastic	wrapper
9059195	plastic, wrapper	-0.211527255	NZ	Thu Oct 08 2020	Oct	2020	Oct-2020	plastic	wrapper
9059194	plastic, wrapper	-0.21152748	NZ	Thu Oct 08 2020	Oct	2020	Oct-2020	plastic	wrapper
9059193	plastic, wrapper	-0.211527528	NZ	Thu Oct 08 2020	Oct	2020	Oct-2020	plastic	wrapper
9059192	plastic, wrapper	-0.211527651	NZ	Thu Oct 08 2020	Oct	2020	Oct-2020	plastic	wrapper
9059191	plastic, wrapper	-0.211527629	NZ	Thu Oct 08 2020	Oct	2020	Oct-2020	plastic	wrapper
9059190	plastic, wrapper	-0.211527514	NZ	Thu Oct 08 2020	Oct	2020	Oct-2020	lid	plastic	pringles
9059189	lid, plastic, pringles	-0.211531077	NZ	Thu Oct 08 2020	Oct	2020	Oct-2020	plastic	piece
9059188	plastic, piece	-0.211528145	NZ	Thu Oct 08 2020	Oct	2020	Oct-2020	plastic
9059187	plastic	-0.211531808	NZ	Thu Oct 08 2020	Oct	2020	Oct-2020	plastic	wrapper
9059186	plastic, wrapper	-0.211528756	NZ	Thu Oct 08 2020	Oct	2020	Oct-2020	plastic	wrapper
9059185	plastic, wrapper	-0.211530069	NZ	Thu Oct 08 2020	Oct	2020	Oct-2020	plastic	piece
9059184	plastic, piece	-0.211529802	NZ	Thu Oct 08 2020	Oct	2020	Oct-2020	plastic	clingwrap
9059183	plastic, clingwrap	-0.211532147	NZ	Thu Oct 08 2020	Oct	2020	Oct-2020	plastic	wrapper
9059182	plastic, wrapper	-0.211528756	NZ	Thu Oct 08 2020	Oct	2020	Oct-2020	plastic	bottle
9059181	plastic, bottle	-0.21152938	NZ	Thu Oct 08 2020	Oct	2020	Oct-2020	plastic	wrapper
9059180	plastic, wrapper	-0.211532311	NZ	Thu Oct 08 2020	Oct	2020	Oct-2020	cigarette	cardboard
9059179	cigarette, cardboard	-0.211530788	NZ	Thu Oct 08 2020	Oct	2020	Oct-2020	plastic	wrapper
9059178	plastic, wrapper	-0.211530769	NZ	Thu Oct 08 2020	Oct	2020	Oct-2020	plastic	wrapper
9059177	plastic, wrapper	-0.211531222	NZ	Thu Oct 08 2020	Oct	2020	Oct-2020	plastic	bottlecap
9059176	plastic, bottlecap	-0.211529876	NZ	Thu Oct 08 2020	Oct	2020	Oct-2020	plastic	confetti
9059175	plastic, confetti	-0.211530507	NZ	Thu Oct 08 2020	Oct	2020	Oct-2020	bag	plastic
9059174	bag, plastic	-0.21153224	NZ	Thu Oct 08 2020	Oct	2020	Oct-2020	plastic
9059173	plastic	-0.211530119	NZ	Thu Oct 08 2020	Oct	2020	Oct-2020	plastic	piece
9059172	plastic, piece	-0.211530396	NZ	Thu Oct 08 2020	Oct	2020	Oct-2020	plastic	strawwrapper
9059171	plastic, strawwrapper	-0.211529985	NZ	Thu Oct 08 2020	Oct	2020	Oct-2020	plastic
9059170	plastic	-0.211530122	NZ	Thu Oct 08 2020	Oct	2020	Oct-2020	plastic	clingwrap
9059169	plastic, clingwrap	-0.211530297	NZ	Thu Oct 08 2020	Oct	2020	Oct-2020	plastic	piece
9059168	plastic, piece	-0.211530087	NZ	Thu Oct 08 2020	Oct	2020	Oct-2020	piece	plastic
9059167	piece, plastic	-0.211530086	NZ	Thu Oct 08 2020	Oct	2020	Oct-2020	plastic	clingwrap
9059166	plastic, clingwrap	-0.211530297	NZ	Thu Oct 08 2020	Oct	2020	Oct-2020	plastic	wrapper
9059165	plastic, wrapper	-0.211530322	NZ	Thu Oct 08 2020	Oct	2020	Oct-2020	plastic	clingwrap
9059164	plastic, clingwrap	-0.211530265	NZ	Thu Oct 08 2020	Oct	2020	Oct-2020	plastic	wrapper
9059163	plastic, wrapper	-0.211530297	NZ	Thu Oct 08 2020	Oct	2020	Oct-2020	plastic
9059162	plastic	-0.211530218	NZ	Thu Oct 08 2020	Oct	2020	Oct-2020	plastic	clingwrap
9059161	plastic, clingwrap	-0.211530265	NZ	Thu Oct 08 2020	Oct	2020	Oct-2020	plastic	clingwrap
9059160	plastic, clingwrap	-0.211530014	NZ	Thu Oct 08 2020	Oct	2020	Oct-2020	plastic	candy	wrapper
9059159	plastic, candy, wrapper	-0.211530497	NZ	Thu Oct 08 2020	Oct	2020	Oct-2020	plastic	wrapper
9059158	plastic, wrapper	-0.211530401	NZ	Thu Oct 08 2020	Oct	2020	Oct-2020	plastic	piece
9059157	plastic, piece	-0.211530347	NZ	Thu Oct 08 2020	Oct	2020	Oct-2020	plastic	piece
9059156	plastic, piece	-0.211530364	NZ	Thu Oct 08 2020	Oct	2020	Oct-2020	plastic	piece
9059155	plastic, piece	-0.211530572	NZ	Thu Oct 08 2020	Oct	2020	Oct-2020	plastic	clingwrap
9059154	plastic, clingwrap	-0.211530443	NZ	Thu Oct 08 2020	Oct	2020	Oct-2020	plastic	wrapper
9059153	plastic, wrapper	-0.211530511	NZ	Thu Oct 08 2020	Oct	2020	Oct-2020	plastic	wrapper
9059152	plastic, wrapper	-0.211530419	NZ	Thu Oct 08 2020	Oct	2020	Oct-2020	plastic	wrapper
9059151	plastic, wrapper	-0.211530427	NZ	Thu Oct 08 2020	Oct	2020	Oct-2020	plastic	wrapper
9059150	plastic, wrapper	-0.211530355	NZ	Thu Oct 08 2020	Oct	2020	Oct-2020	piece	plastic
9059149	piece, plastic	-0.211530575	NZ	Thu Oct 08 2020	Oct	2020	Oct-2020	plastic	wrapper
9059148	plastic, wrapper	-0.211530435	NZ	Thu Oct 08 2020	Oct	2020	Oct-2020	plastic	glove
9059147	plastic, glove	-0.211530827	NZ	Thu Oct 08 2020	Oct	2020	Oct-2020	plastic	piece
9059146	plastic, piece	-0.211530511	NZ	Thu Oct 08 2020	Oct	2020	Oct-2020	plastic	wrapper
9059145	plastic, wrapper	-0.211530528	NZ	Thu Oct 08 2020	Oct	2020	Oct-2020	plastic	piece
9059144	plastic, piece	-0.211530979	NZ	Thu Oct 08 2020	Oct	2020	Oct-2020	plastic	piece
9059143	plastic, piece	-0.211531266	NZ	Thu Oct 08 2020	Oct	2020	Oct-2020	plastic	piece
9059142	plastic, piece	-0.211531411	NZ	Thu Oct 08 2020	Oct	2020	Oct-2020	plastic	piece
9059141	plastic, piece	-0.211531599	NZ	Thu Oct 08 2020	Oct	2020	Oct-2020	aluminum	can
9059140	aluminum, can	-0.211531601	NZ	Thu Oct 08 2020	Oct	2020	Oct-2020	plastic	bottle
9059139	plastic, bottle	-0.211531405	NZ	Thu Oct 08 2020	Oct	2020	Oct-2020	plastic	wrapper
9059138	plastic, wrapper	-0.211531464	NZ	Thu Oct 08 2020	Oct	2020	Oct-2020	plastic	piece
9059137	plastic, piece	-0.211531711	NZ	Thu Oct 08 2020	Oct	2020	Oct-2020	aluminum	can
9059136	aluminum, can	-0.21153105	NZ	Thu Oct 08 2020	Oct	2020	Oct-2020	aluminum	can
9059135	aluminum, can	-0.211530869	NZ	Thu Oct 08 2020	Oct	2020	Oct-2020	plastic	piece
9059134	plastic, piece	-0.211531574	NZ	Thu Oct 08 2020	Oct	2020	Oct-2020	plastic	piece
9059133	plastic, piece	-0.211531453	NZ	Thu Oct 08 2020	Oct	2020	Oct-2020	plastic	piece
9059132	plastic, piece	-0.211531603	NZ	Thu Oct 08 2020	Oct	2020	Oct-2020	plastic	wrapper
9059131	plastic, wrapper	-0.211531333	NZ	Thu Oct 08 2020	Oct	2020	Oct-2020	plastic	piece
9059130	plastic, piece	-0.211531725	NZ	Thu Oct 08 2020	Oct	2020	Oct-2020	plastic	piece
9059129	plastic, piece	-0.211532047	NZ	Thu Oct 08 2020	Oct	2020	Oct-2020	plastic	piece
9059128	plastic, piece	-0.211531672	NZ	Thu Oct 08 2020	Oct	2020	Oct-2020	plastic	bottlecap
9059127	plastic, bottlecap	-0.211532051	NZ	Thu Oct 08 2020	Oct	2020	Oct-2020	aluminum	can
9059126	aluminum, can	-0.211531785	NZ	Thu Oct 08 2020	Oct	2020	Oct-2020	plastic	piece
9059125	plastic, piece	-0.211532506	NZ	Thu Oct 08 2020	Oct	2020	Oct-2020	plastic	piece
9059124	plastic, piece	-0.211532512	NZ	Thu Oct 08 2020	Oct	2020	Oct-2020	plastic	piece
9059123	plastic, piece	-0.211532642	NZ	Thu Oct 08 2020	Oct	2020	Oct-2020	plastic	piece
9059122	plastic, piece	-0.211532611	NZ	Thu Oct 08 2020	Oct	2020	Oct-2020	plastic	wrapper
9059121	plastic, wrapper	-0.211533348	NZ	Thu Oct 08 2020	Oct	2020	Oct-2020	plastic	wrapper
9059120	plastic, wrapper	-0.2115329	NZ	Thu Oct 08 2020	Oct	2020	Oct-2020	plastic	piece
9059119	plastic, piece	-0.211532653	NZ	Thu Oct 08 2020	Oct	2020	Oct-2020	plastic	piece
9059118	plastic, piece	-0.211532687	NZ	Thu Oct 08 2020	Oct	2020	Oct-2020	plastic	piece
9059117	plastic, piece	-0.211532645	NZ	Thu Oct 08 2020	Oct	2020	Oct-2020	plastic	piece
9059116	plastic, piece	-0.211534766	NZ	Thu Oct 08 2020	Oct	2020	Oct-2020	cardboard
9059115	cardboard	-0.211533508	NZ	Thu Oct 08 2020	Oct	2020	Oct-2020	plastic	piece
9059114	plastic, piece	-0.211535407	NZ	Thu Oct 08 2020	Oct	2020	Oct-2020	plastic	piece
9059113	plastic, piece	-0.211533769	NZ	Thu Oct 08 2020	Oct	2020	Oct-2020	plastic	piece
9059112	plastic, piece	-0.211534965	NZ	Thu Oct 08 2020	Oct	2020	Oct-2020	plastic	piece
9059111	plastic, piece	-0.211537371	NZ	Thu Oct 08 2020	Oct	2020	Oct-2020	plastic	wrapper
9059110	plastic, wrapper	-0.211535118	NZ	Thu Oct 08 2020	Oct	2020	Oct-2020	plastic	piece
9059109	plastic, piece	-0.21153703	NZ	Thu Oct 08 2020	Oct	2020	Oct-2020	foam	plastic
9059108	foam, plastic	-0.211535783	NZ	Thu Oct 08 2020	Oct	2020	Oct-2020	plastic	bottlecap
9059107	plastic, bottlecap	-0.211536784	NZ	Thu Oct 08 2020	Oct	2020	Oct-2020	plastic	piece
9059106	plastic, piece	-0.211536201	NZ	Thu Oct 08 2020	Oct	2020	Oct-2020	plastic	wrapper
9059105	plastic, wrapper	-0.211536547	NZ	Thu Oct 08 2020	Oct	2020	Oct-2020	plastic	bottlecap
9059104	plastic, bottlecap	-0.211536941	NZ	Thu Oct 08 2020	Oct	2020	Oct-2020	plastic	wrapper
9059103	plastic, wrapper	-0.21153716	NZ	Thu Oct 08 2020	Oct	2020	Oct-2020	plastic	wrapper
9059102	plastic, wrapper	-0.211537037	NZ	Thu Oct 08 2020	Oct	2020	Oct-2020	plastic	bottle
9059101	plastic, bottle	-0.21153633	NZ	Thu Oct 08 2020	Oct	2020	Oct-2020	plastic	wrapper
9059100	plastic, wrapper	-0.211536246	NZ	Thu Oct 08 2020	Oct	2020	Oct-2020	plastic	piece
9059099	plastic, piece	-0.211536797	NZ	Thu Oct 08 2020	Oct	2020	Oct-2020	plastic
9059098	plastic	-0.211536351	NZ	Thu Oct 08 2020	Oct	2020	Oct-2020	plastic	piece	plasticnevergoesaway	wrapper
9059097	plastic, piece, plasticnevergoesaway, wrapper	-0.211536771	NZ	Thu Oct 08 2020	Oct	2020	Oct-2020	plastic	piece
9059096	plastic, piece	-0.211536536	NZ	Thu Oct 08 2020	Oct	2020	Oct-2020	plastic	bottlecap
9059095	plastic, bottlecap	-0.2115367	NZ	Thu Oct 08 2020	Oct	2020	Oct-2020	plastic	cardboard
9059094	plastic, cardboard	-0.211536536	NZ	Thu Oct 08 2020	Oct	2020	Oct-2020	piece	plastic
9059093	piece, plastic	-0.21153588	NZ	Thu Oct 08 2020	Oct	2020	Oct-2020	plastic	wrapper
9059092	plastic, wrapper	-0.211535965	NZ	Thu Oct 08 2020	Oct	2020	Oct-2020	aluminum	can
9059090	aluminum, can	-0.211535972	NZ	Thu Oct 08 2020	Oct	2020	Oct-2020	plastic	wrapper
9059089	plastic, wrapper	-0.211537125	NZ	Thu Oct 08 2020	Oct	2020	Oct-2020	plastic	lid	pringles
9059088	plastic, lid, pringles	-0.21153705	NZ	Thu Oct 08 2020	Oct	2020	Oct-2020	piece	plastic
9059087	piece, plastic	-0.211537058	NZ	Thu Oct 08 2020	Oct	2020	Oct-2020	plastic	wrapper
9059086	plastic, wrapper	-0.211536829	NZ	Thu Oct 08 2020	Oct	2020	Oct-2020	plastic	wrapper
9059085	plastic, wrapper	-0.211537058	NZ	Thu Oct 08 2020	Oct	2020	Oct-2020	piece	plastic
9059084	piece, plastic	-0.211538049	NZ	Thu Oct 08 2020	Oct	2020	Oct-2020	bottlecap	metal
9059083	bottlecap, metal	-0.211538052	NZ	Thu Oct 08 2020	Oct	2020	Oct-2020	aluminum	can
9059082	aluminum, can	-0.211536445	NZ	Thu Oct 08 2020	Oct	2020	Oct-2020	plastic	bottle
9059081	plastic, bottle	-0.211536659	NZ	Thu Oct 08 2020	Oct	2020	Oct-2020	plastic	fishingline
9059080	plastic, fishingline	-0.211538112	NZ	Thu Oct 08 2020	Oct	2020	Oct-2020	plastic	straw	wrapper
9059079	plastic, straw, wrapper	-0.211537901	NZ	Thu Oct 08 2020	Oct	2020	Oct-2020	piece	plastic	wrapper
9059078	piece, plastic, wrapper	-0.211538088	NZ	Thu Oct 08 2020	Oct	2020	Oct-2020	piece	plastic
9059077	piece, plastic	-0.211537894	NZ	Thu Oct 08 2020	Oct	2020	Oct-2020	piece	plastic
9059076	piece, plastic	-0.211538036	NZ	Thu Oct 08 2020	Oct	2020	Oct-2020	piece	plastic
9059075	piece, plastic	-0.211539198	NZ	Thu Oct 08 2020	Oct	2020	Oct-2020	piece	plastic
9059074	piece, plastic	-0.21153951	NZ	Thu Oct 08 2020	Oct	2020	Oct-2020	bottle	plastic
9059073	bottle, plastic	-0.211539238	NZ	Thu Oct 08 2020	Oct	2020	Oct-2020	plastic
9059072	plastic	-0.211539265	NZ	Thu Oct 08 2020	Oct	2020	Oct-2020	plastic
9059071	plastic	-0.21153949	NZ	Thu Oct 08 2020	Oct	2020	Oct-2020	piece	plastic
9059070	piece, plastic	-0.21153824	NZ	Thu Oct 08 2020	Oct	2020	Oct-2020	metal
9059069	metal	-0.211537586	NZ	Thu Oct 08 2020	Oct	2020	Oct-2020	cutlery	plastic
9059068	cutlery, plastic	-0.211537962	NZ	Thu Oct 08 2020	Oct	2020	Oct-2020	cutlery	plastic
9059067	cutlery, plastic	-0.211538016	NZ	Thu Oct 08 2020	Oct	2020	Oct-2020	metal
9059066	metal	-0.211538151	NZ	Thu Oct 08 2020	Oct	2020	Oct-2020	piece	plastic
9059065	piece, plastic	-0.211537668	NZ	Thu Oct 08 2020	Oct	2020	Oct-2020	metal
9059064	metal	-0.211537757	NZ	Thu Oct 08 2020	Oct	2020	Oct-2020	plastic
9059063	plastic	-0.211537918	NZ	Thu Oct 08 2020	Oct	2020	Oct-2020	cutlery	plastic
9059062	cutlery, plastic	-0.211537962	NZ	Thu Oct 08 2020	Oct	2020	Oct-2020	plastic
9059061	plastic	-0.211537572	NZ	Thu Oct 08 2020	Oct	2020	Oct-2020	plastic	wrapper
9059060	plastic, wrapper	-0.211536901	NZ	Thu Oct 08 2020	Oct	2020	Oct-2020	metal
9059059	metal	-0.211537503	NZ	Thu Oct 08 2020	Oct	2020	Oct-2020	strawwrapper	plastic
9059058	strawwrapper, plastic	-0.211537243	NZ	Thu Oct 08 2020	Oct	2020	Oct-2020	piece	plastic
9059057	piece, plastic	-0.21153824	NZ	Thu Oct 08 2020	Oct	2020	Oct-2020	plastic	bottlecap
9059056	plastic, bottlecap	-0.211538349	NZ	Thu Oct 08 2020	Oct	2020	Oct-2020	cutlery	plastic
9059055	cutlery, plastic	-0.211538016	NZ	Thu Oct 08 2020	Oct	2020	Oct-2020	plastic	wrapper
9058102	plastic, wrapper	-0.211536669	NZ	Thu Oct 08 2020	Oct	2020	Oct-2020	metal
9058101	metal	-0.211536425	NZ	Thu Oct 08 2020	Oct	2020	Oct-2020	plastic
9058100	plastic	-0.211536529	NZ	Thu Oct 08 2020	Oct	2020	Oct-2020	metal
9058099	metal	-0.211536488	NZ	Thu Oct 08 2020	Oct	2020	Oct-2020	piece	plastic
9058098	piece, plastic	-0.211536708	NZ	Thu Oct 08 2020	Oct	2020	Oct-2020	metal
9058097	metal	-0.211536425	NZ	Thu Oct 08 2020	Oct	2020	Oct-2020	plastic	foam
9058096	plastic, foam	-0.21153587	NZ	Thu Oct 08 2020	Oct	2020	Oct-2020	plastic	wrapper
9058095	plastic, wrapper	-0.211534895	NZ	Thu Oct 08 2020	Oct	2020	Oct-2020	plastic	wrapper
9058094	plastic, wrapper	-0.211531206	NZ	Thu Oct 08 2020	Oct	2020	Oct-2020	metal
9058093	metal	-0.211536782	NZ	Thu Oct 08 2020	Oct	2020	Oct-2020	piece	plastic
9058092	piece, plastic	-0.211531754	NZ	Thu Oct 08 2020	Oct	2020	Oct-2020	plastic	wrapper
9058091	plastic, wrapper	-0.211531198	NZ	Thu Oct 08 2020	Oct	2020	Oct-2020	plastic	bottlecap
9058090	plastic, bottlecap	-0.211534077	NZ	Thu Oct 08 2020	Oct	2020	Oct-2020	plastic	straw
9058089	plastic, straw	-0.211535341	NZ	Thu Oct 08 2020	Oct	2020	Oct-2020	plastic	bottle
9058088	plastic, bottle	-0.211534895	NZ	Thu Oct 08 2020	Oct	2020	Oct-2020	plastic	bottle
9058087	plastic, bottle	-0.211534663	NZ	Thu Oct 08 2020	Oct	2020	Oct-2020	plastic	wrapper
9058086	plastic, wrapper	-0.211531236	NZ	Thu Oct 08 2020	Oct	2020	Oct-2020	cup	carlsjr
9058085	cup, carlsjr	-0.211533316	NZ	Thu Oct 08 2020	Oct	2020	Oct-2020	plastic
9058084	plastic	-0.211533695	NZ	Thu Oct 08 2020	Oct	2020	Oct-2020	plastic	wrapper
9058083	plastic, wrapper	-0.21153124	NZ	Thu Oct 08 2020	Oct	2020	Oct-2020	plastic	wrapper
9058082	plastic, wrapper	-0.211531206	NZ	Thu Oct 08 2020	Oct	2020	Oct-2020	hairtie
9058081	hairtie	-0.211531057	NZ	Thu Oct 08 2020	Oct	2020	Oct-2020	plastic	piece
9058080	plastic, piece	-0.211527742	NZ	Thu Oct 08 2020	Oct	2020	Oct-2020	plastic	piece
9058079	plastic, piece	-0.211526973	NZ	Thu Oct 08 2020	Oct	2020	Oct-2020	plastic	piece
9058078	plastic, piece	-0.211529064	NZ	Thu Oct 08 2020	Oct	2020	Oct-2020	plastic	piece
9058077	plastic, piece	-0.211526952	NZ	Thu Oct 08 2020	Oct	2020	Oct-2020	plastic	facemask
9058076	plastic, facemask	-0.211529424	NZ	Thu Oct 08 2020	Oct	2020	Oct-2020	plastic	piece
9058075	plastic, piece	-0.211526991	NZ	Thu Oct 08 2020	Oct	2020	Oct-2020	metal
9058074	metal	-0.211527432	NZ	Thu Oct 08 2020	Oct	2020	Oct-2020	bottlecap	metal
9058073	bottlecap, metal	-0.211527706	NZ	Thu Oct 08 2020	Oct	2020	Oct-2020	plastic	piece
9058072	plastic, piece	-0.211527964	NZ	Thu Oct 08 2020	Oct	2020	Oct-2020	plastic	wrapper
9058071	plastic, wrapper	-0.211531411	NZ	Thu Oct 08 2020	Oct	2020	Oct-2020	plastic	wrapper
9058070	plastic, wrapper	-0.211531411	NZ	Thu Oct 08 2020	Oct	2020	Oct-2020	plastic	wrapper
9058069	plastic, wrapper	-0.211531411	NZ	Thu Oct 08 2020	Oct	2020	Oct-2020	lid	plastic	straw
9058068	lid, plastic, straw	-0.211527535	NZ	Thu Oct 08 2020	Oct	2020	Oct-2020	plastic	wrapper
9058067	plastic, wrapper	-0.21153131	NZ	Thu Oct 08 2020	Oct	2020	Oct-2020	plastic	rope
9057046	plastic, rope	-0.210926044	NZ	Wed Oct 07 2020	Oct	2020	Oct-2020	plastic	piece
9057045	plastic, piece	-0.210926046	NZ	Wed Oct 07 2020	Oct	2020	Oct-2020	plastic	piece
9057044	plastic, piece	-0.210926085	NZ	Wed Oct 07 2020	Oct	2020	Oct-2020	plastic	piece
9057043	plastic, piece	-0.210926037	NZ	Wed Oct 07 2020	Oct	2020	Oct-2020	plastic	piece
9057042	plastic, piece	-0.210925729	NZ	Wed Oct 07 2020	Oct	2020	Oct-2020	plastic	wrapper
9057041	plastic, wrapper	-0.210926458	NZ	Wed Oct 07 2020	Oct	2020	Oct-2020	plastic	piece
9057040	plastic, piece	-0.210926018	NZ	Wed Oct 07 2020	Oct	2020	Oct-2020	plastic	wrapper
9057039	plastic, wrapper	-0.210926332	NZ	Wed Oct 07 2020	Oct	2020	Oct-2020	plastic	piece
9057038	plastic, piece	-0.210926037	NZ	Wed Oct 07 2020	Oct	2020	Oct-2020	bottlecap	metal
9043467	bottlecap, metal	-0.236248357	NZ	Wed Oct 07 2020	Oct	2020	Oct-2020	bottlecap	metal
9043466	bottlecap, metal	-0.236248533	NZ	Wed Oct 07 2020	Oct	2020	Oct-2020	aluminum
9043465	aluminum	-0.23624758	NZ	Wed Oct 07 2020	Oct	2020	Oct-2020	bottlecap
9043464	bottlecap	-0.236247493	NZ	Wed Oct 07 2020	Oct	2020	Oct-2020	plastic	bottle
9043463	plastic, bottle	-0.236255557	NZ	Wed Oct 07 2020	Oct	2020	Oct-2020	aluminum
9043462	aluminum	-0.236252889	NZ	Wed Oct 07 2020	Oct	2020	Oct-2020	cigarette
9043461	cigarette	-0.236250189	NZ	Wed Oct 07 2020	Oct	2020	Oct-2020	cigarette
9043460	cigarette	-0.236258561	NZ	Wed Oct 07 2020	Oct	2020	Oct-2020	cigarette
9043459	cigarette	-0.236258028	NZ	Wed Oct 07 2020	Oct	2020	Oct-2020	glass
9043458	glass	-0.236256345	NZ	Wed Oct 07 2020	Oct	2020	Oct-2020	metal	screw
9043457	metal, screw	-0.236254643	NZ	Wed Oct 07 2020	Oct	2020	Oct-2020	cigarette
9043456	cigarette	-0.236252547	NZ	Wed Oct 07 2020	Oct	2020	Oct-2020	paper
9043455	paper	-0.236249194	NZ	Wed Oct 07 2020	Oct	2020	Oct-2020	bottlecap	metal
9043454	bottlecap, metal	-0.236254596	NZ	Wed Oct 07 2020	Oct	2020	Oct-2020	plaster
9043453	plaster	-0.236257242	NZ	Wed Oct 07 2020	Oct	2020	Oct-2020	aluminum
9043452	aluminum	-0.236257882	NZ	Wed Oct 07 2020	Oct	2020	Oct-2020	plastic
9043451	plastic	-0.236258429	NZ	Wed Oct 07 2020	Oct	2020	Oct-2020	cigarette
9043450	cigarette	-0.236257932	NZ	Wed Oct 07 2020	Oct	2020	Oct-2020	cigarette
9043449	cigarette	-0.236258035	NZ	Wed Oct 07 2020	Oct	2020	Oct-2020	cigarette
9043448	cigarette	-0.236257142	NZ	Wed Oct 07 2020	Oct	2020	Oct-2020	cottonbud
9043447	cottonbud	-0.236255758	NZ	Wed Oct 07 2020	Oct	2020	Oct-2020	cigarette
9043446	cigarette	-0.236257171	NZ	Wed Oct 07 2020	Oct	2020	Oct-2020	plastic
9043445	plastic	-0.236255536	NZ	Wed Oct 07 2020	Oct	2020	Oct-2020	cigarette
9043444	cigarette	-0.236251556	NZ	Wed Oct 07 2020	Oct	2020	Oct-2020	plastic
9043443	plastic	-0.236253929	NZ	Wed Oct 07 2020	Oct	2020	Oct-2020	plastic
9043442	plastic	-0.236256105	NZ	Wed Oct 07 2020	Oct	2020	Oct-2020	plastic
9043441	plastic	-0.236256051	NZ	Wed Oct 07 2020	Oct	2020	Oct-2020	cigarette
9043440	cigarette	-0.236255758	NZ	Wed Oct 07 2020	Oct	2020	Oct-2020	cigarette
9043439	cigarette	-0.236256105	NZ	Wed Oct 07 2020	Oct	2020	Oct-2020	cigarette
9043438	cigarette	-0.236254459	NZ	Wed Oct 07 2020	Oct	2020	Oct-2020	cigarette
9043437	cigarette	-0.236254444	NZ	Wed Oct 07 2020	Oct	2020	Oct-2020	cigarette
9043436	cigarette	-0.236255006	NZ	Wed Oct 07 2020	Oct	2020	Oct-2020	cigarette
9043435	cigarette	-0.236251508	NZ	Wed Oct 07 2020	Oct	2020	Oct-2020	cigarette
9043434	cigarette	-0.236251565	NZ	Wed Oct 07 2020	Oct	2020	Oct-2020	cigarette
9043433	cigarette	-0.236249612	NZ	Wed Oct 07 2020	Oct	2020	Oct-2020	cigarette
9043432	cigarette	-0.236251565	NZ	Wed Oct 07 2020	Oct	2020	Oct-2020	aluminum
9043431	aluminum	-0.236250841	NZ	Wed Oct 07 2020	Oct	2020	Oct-2020	cigarette
9043430	cigarette	-0.236250935	NZ	Wed Oct 07 2020	Oct	2020	Oct-2020	cigarette
9043429	cigarette	-0.236250952	NZ	Wed Oct 07 2020	Oct	2020	Oct-2020	cigarette
9043428	cigarette	-0.236250764	NZ	Wed Oct 07 2020	Oct	2020	Oct-2020	cigarette
9043427	cigarette	-0.236251352	NZ	Wed Oct 07 2020	Oct	2020	Oct-2020	cigarette
9043426	cigarette	-0.236249873	NZ	Wed Oct 07 2020	Oct	2020	Oct-2020	cigarette
9043425	cigarette	-0.236250974	NZ	Wed Oct 07 2020	Oct	2020	Oct-2020	cigarette
9043424	cigarette	-0.236249518	NZ	Wed Oct 07 2020	Oct	2020	Oct-2020	cigarette
9043423	cigarette	-0.236250841	NZ	Wed Oct 07 2020	Oct	2020	Oct-2020	plastic
9043422	plastic	-0.236249496	NZ	Wed Oct 07 2020	Oct	2020	Oct-2020	cigarette
9043421	cigarette	-0.236249934	NZ	Wed Oct 07 2020	Oct	2020	Oct-2020	cigarette
9043420	cigarette	-0.236249518	NZ	Wed Oct 07 2020	Oct	2020	Oct-2020	cigarette
9043419	cigarette	-0.236250952	NZ	Wed Oct 07 2020	Oct	2020	Oct-2020	glass
9043418	glass	-0.236246031	NZ	Wed Oct 07 2020	Oct	2020	Oct-2020	cigarette
9043417	cigarette	-0.236248069	NZ	Wed Oct 07 2020	Oct	2020	Oct-2020	plastic	bottle
9043416	plastic, bottle	-0.236246948	NZ	Wed Oct 07 2020	Oct	2020	Oct-2020	plastic	bottle
9043415	plastic, bottle	-0.236246929	NZ	Wed Oct 07 2020	Oct	2020	Oct-2020	aluminum
9043414	aluminum	-0.236248313	NZ	Wed Oct 07 2020	Oct	2020	Oct-2020	plastic
9043413	plastic	-0.23624861	NZ	Wed Oct 07 2020	Oct	2020	Oct-2020	cigarette
9043412	cigarette	-0.236248245	NZ	Wed Oct 07 2020	Oct	2020	Oct-2020	cigarette
9043411	cigarette	-0.236245658	NZ	Wed Oct 07 2020	Oct	2020	Oct-2020	aluminium
9043410	aluminium	-0.236248575	NZ	Wed Oct 07 2020	Oct	2020	Oct-2020	plastic
9043409	plastic	-0.236248313	NZ	Wed Oct 07 2020	Oct	2020	Oct-2020	aluminum
9043408	aluminum	-0.236248288	NZ	Wed Oct 07 2020	Oct	2020	Oct-2020	cigarette
9043407	cigarette	-0.236248636	NZ	Wed Oct 07 2020	Oct	2020	Oct-2020	bottlecap	plastic
9043406	bottlecap, plastic	-0.23624746	NZ	Wed Oct 07 2020	Oct	2020	Oct-2020	cigarette
9043405	cigarette	-0.236247995	NZ	Wed Oct 07 2020	Oct	2020	Oct-2020	cigarette
9043404	cigarette	-0.236249429	NZ	Wed Oct 07 2020	Oct	2020	Oct-2020	cottonbud
9043403	cottonbud	-0.236247126	NZ	Wed Oct 07 2020	Oct	2020	Oct-2020	cottonbud
9043402	cottonbud	-0.236244187	NZ	Wed Oct 07 2020	Oct	2020	Oct-2020	paper
9043401	paper	-0.236245596	NZ	Wed Oct 07 2020	Oct	2020	Oct-2020	plastic
9043400	plastic	-0.236247197	NZ	Wed Oct 07 2020	Oct	2020	Oct-2020	bottlecap	metal
9043399	bottlecap, metal	-0.236245426	NZ	Wed Oct 07 2020	Oct	2020	Oct-2020	plastic
9043398	plastic	-0.236246944	NZ	Wed Oct 07 2020	Oct	2020	Oct-2020	cigarette
9043397	cigarette	-0.236243864	NZ	Wed Oct 07 2020	Oct	2020	Oct-2020	cigarette
9043396	cigarette	-0.236243855	NZ	Wed Oct 07 2020	Oct	2020	Oct-2020	cigarette
9043395	cigarette	-0.236245122	NZ	Wed Oct 07 2020	Oct	2020	Oct-2020	plastic
9043394	plastic	-0.236245311	NZ	Wed Oct 07 2020	Oct	2020	Oct-2020	styrofoam
9043393	styrofoam	-0.236246001	NZ	Wed Oct 07 2020	Oct	2020	Oct-2020	cigarette
9043392	cigarette	-0.236245294	NZ	Wed Oct 07 2020	Oct	2020	Oct-2020	bottlecap	metal
9043391	bottlecap, metal	-0.236248742	NZ	Wed Oct 07 2020	Oct	2020	Oct-2020	aluminum	can
9043390	aluminum, can	-0.236245098	NZ	Wed Oct 07 2020	Oct	2020	Oct-2020	plastic
9043389	plastic	-0.236245977	NZ	Wed Oct 07 2020	Oct	2020	Oct-2020	plastic	wrapper
9043385	plastic, wrapper	-0.210887691	NZ	Wed Oct 07 2020	Oct	2020	Oct-2020	piece	plastic
9043383	piece, plastic	-0.210887728	NZ	Wed Oct 07 2020	Oct	2020	Oct-2020	plastic	bottlecap
9043382	plastic, bottlecap	-0.210887724	NZ	Wed Oct 07 2020	Oct	2020	Oct-2020	plastic	facemask
9043381	plastic, facemask	-0.21088774	NZ	Wed Oct 07 2020	Oct	2020	Oct-2020	plastic	wrapper
9043380	plastic, wrapper	-0.210885116	NZ	Wed Oct 07 2020	Oct	2020	Oct-2020	plastic	lipbalm
9043379	plastic, lipbalm	-0.210887812	NZ	Wed Oct 07 2020	Oct	2020	Oct-2020	piece	plastic
9043378	piece, plastic	-0.210886357	NZ	Wed Oct 07 2020	Oct	2020	Oct-2020	piece	plastic
9043377	piece, plastic	-0.21088638	NZ	Wed Oct 07 2020	Oct	2020	Oct-2020	aluminum	can
9043376	aluminum, can	-0.21088732	NZ	Wed Oct 07 2020	Oct	2020	Oct-2020	plastic
9043375	plastic	-0.210886613	NZ	Wed Oct 07 2020	Oct	2020	Oct-2020	piece	plastic
9043374	piece, plastic	-0.210886581	NZ	Wed Oct 07 2020	Oct	2020	Oct-2020	plastic	bottlecap
9043373	plastic, bottlecap	-0.210886596	NZ	Wed Oct 07 2020	Oct	2020	Oct-2020	plastic	bag
9043372	plastic, bag	-0.2108873	NZ	Wed Oct 07 2020	Oct	2020	Oct-2020	piece	plastic
9043371	piece, plastic	-0.210885823	NZ	Wed Oct 07 2020	Oct	2020	Oct-2020	piece	plastic
9043370	piece, plastic	-0.210884426	NZ	Wed Oct 07 2020	Oct	2020	Oct-2020	piece	plastic
9043369	piece, plastic	-0.210882592	NZ	Wed Oct 07 2020	Oct	2020	Oct-2020	piece	plastic
9043368	piece, plastic	-0.210886348	NZ	Wed Oct 07 2020	Oct	2020	Oct-2020	plastic	bottlecap
9043367	plastic, bottlecap	-0.210883694	NZ	Wed Oct 07 2020	Oct	2020	Oct-2020	plastic	mcdonald's
9043366	plastic, mcdonald's	-0.210886727	NZ	Wed Oct 07 2020	Oct	2020	Oct-2020	piece	plastic
9043365	piece, plastic	-0.210881589	NZ	Wed Oct 07 2020	Oct	2020	Oct-2020	piece	plastic
9043364	piece, plastic	-0.210881058	NZ	Wed Oct 07 2020	Oct	2020	Oct-2020	plastic	lollipopstick
9043363	plastic, lollipopstick	-0.210882497	NZ	Wed Oct 07 2020	Oct	2020	Oct-2020	piece	plastic
9043362	piece, plastic	-0.210882149	NZ	Wed Oct 07 2020	Oct	2020	Oct-2020	cup	plastic	plasticlid
9043361	cup, plastic, plasticlid	-0.210881839	NZ	Wed Oct 07 2020	Oct	2020	Oct-2020	piece	plastic
9043359	piece, plastic	-0.210881866	NZ	Wed Oct 07 2020	Oct	2020	Oct-2020	piece	plastic
9043358	piece, plastic	-0.210882673	NZ	Wed Oct 07 2020	Oct	2020	Oct-2020	piece	plastic
9043357	piece, plastic	-0.210880912	NZ	Wed Oct 07 2020	Oct	2020	Oct-2020	aluminum	can
9043356	aluminum, can	-0.210881691	NZ	Wed Oct 07 2020	Oct	2020	Oct-2020	piece	plastic
9043355	piece, plastic	-0.210890835	NZ	Wed Oct 07 2020	Oct	2020	Oct-2020	piece	plastic
9043354	piece, plastic	-0.210888558	NZ	Wed Oct 07 2020	Oct	2020	Oct-2020	piece	plastic
9043353	piece, plastic	-0.210890779	NZ	Wed Oct 07 2020	Oct	2020	Oct-2020	aluminum	metal
9043352	aluminum, metal	-0.210880872	NZ	Wed Oct 07 2020	Oct	2020	Oct-2020	piece	plastic
9043351	piece, plastic	-0.210883397	NZ	Wed Oct 07 2020	Oct	2020	Oct-2020	plastic	straw
9043350	plastic, straw	-0.210902472	NZ	Wed Oct 07 2020	Oct	2020	Oct-2020	glove	plastic
9043349	glove, plastic	-0.210902558	NZ	Wed Oct 07 2020	Oct	2020	Oct-2020	plastic	lollipopstick
9043348	plastic, lollipopstick	-0.210902293	NZ	Wed Oct 07 2020	Oct	2020	Oct-2020	plastic	wrapper
9043347	plastic, wrapper	-0.210902346	NZ	Wed Oct 07 2020	Oct	2020	Oct-2020	plastic	wrapper
9043346	plastic, wrapper	-0.21090255	NZ	Wed Oct 07 2020	Oct	2020	Oct-2020	plastic	wrapper
9043345	plastic, wrapper	-0.210902524	NZ	Wed Oct 07 2020	Oct	2020	Oct-2020	plastic	chocolate	tray
9043344	plastic, chocolate, tray	-0.210902281	NZ	Wed Oct 07 2020	Oct	2020	Oct-2020	piece	plastic
9043343	piece, plastic	-0.210902363	NZ	Wed Oct 07 2020	Oct	2020	Oct-2020	piece	plastic
9043342	piece, plastic	-0.210902465	NZ	Wed Oct 07 2020	Oct	2020	Oct-2020	plastic	bag
9043341	plastic, bag	-0.210902341	NZ	Wed Oct 07 2020	Oct	2020	Oct-2020	candy	plastic	wrapper
9043340	candy, plastic, wrapper	-0.210902293	NZ	Wed Oct 07 2020	Oct	2020	Oct-2020	piece	plastic
9043339	piece, plastic	-0.210902541	NZ	Wed Oct 07 2020	Oct	2020	Oct-2020	plastic	wrapper
9043338	plastic, wrapper	-0.210890825	NZ	Wed Oct 07 2020	Oct	2020	Oct-2020	plastic	cigarettepack
9043337	plastic, cigarettepack	-0.210902341	NZ	Wed Oct 07 2020	Oct	2020	Oct-2020	piece	plastic
9043336	piece, plastic	-0.210902264	NZ	Wed Oct 07 2020	Oct	2020	Oct-2020	plastic	cottonbud
9043335	plastic, cottonbud	-0.210903407	NZ	Wed Oct 07 2020	Oct	2020	Oct-2020	piece	plastic
9043334	piece, plastic	-0.210903414	NZ	Wed Oct 07 2020	Oct	2020	Oct-2020	piece	plastic
9043333	piece, plastic	-0.21090381	NZ	Wed Oct 07 2020	Oct	2020	Oct-2020	piece	plastic
9043332	piece, plastic	-0.210903461	NZ	Wed Oct 07 2020	Oct	2020	Oct-2020	paper
9043331	paper	-0.210902584	NZ	Wed Oct 07 2020	Oct	2020	Oct-2020	piece	plastic
9043330	piece, plastic	-0.210903449	NZ	Wed Oct 07 2020	Oct	2020	Oct-2020	piece	plastic
9043329	piece, plastic	-0.210903611	NZ	Wed Oct 07 2020	Oct	2020	Oct-2020	piece	plastic
9043328	piece, plastic	-0.210903444	NZ	Wed Oct 07 2020	Oct	2020	Oct-2020	plastic	wrapper
9043327	plastic, wrapper	-0.210903461	NZ	Wed Oct 07 2020	Oct	2020	Oct-2020	piece	plastic
9043326	piece, plastic	-0.210903305	NZ	Wed Oct 07 2020	Oct	2020	Oct-2020	piece	plastic
9043325	piece, plastic	-0.210903442	NZ	Wed Oct 07 2020	Oct	2020	Oct-2020	piece	plastic
9043324	piece, plastic	-0.210903442	NZ	Wed Oct 07 2020	Oct	2020	Oct-2020	plastic	cone
9043323	plastic, cone	-0.210903667	NZ	Wed Oct 07 2020	Oct	2020	Oct-2020	piece	plastic
9043322	piece, plastic	-0.210903489	NZ	Wed Oct 07 2020	Oct	2020	Oct-2020	piece	plastic
9043321	piece, plastic	-0.210903407	NZ	Wed Oct 07 2020	Oct	2020	Oct-2020	piece	plastic
9043320	piece, plastic	-0.210903723	NZ	Wed Oct 07 2020	Oct	2020	Oct-2020	piece	plastic
9043319	piece, plastic	-0.210903788	NZ	Wed Oct 07 2020	Oct	2020	Oct-2020	piece	plastic
9043318	piece, plastic	-0.210900054	NZ	Wed Oct 07 2020	Oct	2020	Oct-2020	piece	plastic
9043317	piece, plastic	-0.210900101	NZ	Wed Oct 07 2020	Oct	2020	Oct-2020	piece	plastic
9043316	piece, plastic	-0.210903835	NZ	Wed Oct 07 2020	Oct	2020	Oct-2020	piece	plastic
9043315	piece, plastic	-0.210903723	NZ	Wed Oct 07 2020	Oct	2020	Oct-2020	piece	plastic
9043314	piece, plastic	-0.210900242	NZ	Wed Oct 07 2020	Oct	2020	Oct-2020	plastic	wrapper
9043313	plastic, wrapper	-0.210899859	NZ	Wed Oct 07 2020	Oct	2020	Oct-2020	piece	plastic
9043312	piece, plastic	-0.210900022	NZ	Wed Oct 07 2020	Oct	2020	Oct-2020	piece	plastic
9043311	piece, plastic	-0.210897657	NZ	Wed Oct 07 2020	Oct	2020	Oct-2020	plastic	bottlecap
9043310	plastic, bottlecap	-0.210900166	NZ	Wed Oct 07 2020	Oct	2020	Oct-2020	piece	plastic
9043309	piece, plastic	-0.210900079	NZ	Wed Oct 07 2020	Oct	2020	Oct-2020	piece	plastic
9043308	piece, plastic	-0.210900165	NZ	Wed Oct 07 2020	Oct	2020	Oct-2020	plastic	wrapper
9043307	plastic, wrapper	-0.210899988	NZ	Wed Oct 07 2020	Oct	2020	Oct-2020	piece	plastic
9043306	piece, plastic	-0.21089986	NZ	Wed Oct 07 2020	Oct	2020	Oct-2020	piece	plastic
9043305	piece, plastic	-0.210901196	NZ	Wed Oct 07 2020	Oct	2020	Oct-2020	piece	plastic
9043304	piece, plastic	-0.21090259	NZ	Wed Oct 07 2020	Oct	2020	Oct-2020	plastic	wrapper
9043303	plastic, wrapper	-0.210903543	NZ	Wed Oct 07 2020	Oct	2020	Oct-2020	piece	plastic
9043302	piece, plastic	-0.210901174	NZ	Wed Oct 07 2020	Oct	2020	Oct-2020	piece	plastic
9043301	piece, plastic	-0.210901174	NZ	Wed Oct 07 2020	Oct	2020	Oct-2020	piece	plastic
9043300	piece, plastic	-0.210902161	NZ	Wed Oct 07 2020	Oct	2020	Oct-2020	plastic	wrapper
9043299	plastic, wrapper	-0.210903445	NZ	Wed Oct 07 2020	Oct	2020	Oct-2020	piece	plastic
9043298	piece, plastic	-0.210901174	NZ	Wed Oct 07 2020	Oct	2020	Oct-2020	polystyrene
9043297	polystyrene	-0.210903325	NZ	Wed Oct 07 2020	Oct	2020	Oct-2020	plastic	wrapper
9043296	plastic, wrapper	-0.21090344	NZ	Wed Oct 07 2020	Oct	2020	Oct-2020	plastic	wrapper
9043295	plastic, wrapper	-0.210903497	NZ	Wed Oct 07 2020	Oct	2020	Oct-2020	polystyrene
9043294	polystyrene	-0.210903511	NZ	Wed Oct 07 2020	Oct	2020	Oct-2020	plastic	wrapper
9043293	plastic, wrapper	-0.210903511	NZ	Wed Oct 07 2020	Oct	2020	Oct-2020	polystyrene
9043292	polystyrene	-0.210903316	NZ	Wed Oct 07 2020	Oct	2020	Oct-2020	aluminum	can
9043291	aluminum, can	-0.210903543	NZ	Wed Oct 07 2020	Oct	2020	Oct-2020	brokenglass
9043290	brokenglass	-0.210906563	NZ	Wed Oct 07 2020	Oct	2020	Oct-2020	plastic	mcdonald's
9043289	plastic, mcdonald's	-0.210907061	NZ	Wed Oct 07 2020	Oct	2020	Oct-2020	plastic	wrapper
9043288	plastic, wrapper	-0.210903574	NZ	Wed Oct 07 2020	Oct	2020	Oct-2020	plastic	wrapper
9043287	plastic, wrapper	-0.210906648	NZ	Wed Oct 07 2020	Oct	2020	Oct-2020	aluminum	can
9043286	aluminum, can	-0.210903907	NZ	Wed Oct 07 2020	Oct	2020	Oct-2020	plastic	wrapper
9043285	plastic, wrapper	-0.210906638	NZ	Wed Oct 07 2020	Oct	2020	Oct-2020	plastic	wrapper
9043284	plastic, wrapper	-0.210906815	NZ	Wed Oct 07 2020	Oct	2020	Oct-2020	brokenglass
9043283	brokenglass	-0.210906952	NZ	Wed Oct 07 2020	Oct	2020	Oct-2020	brokenglass
9043282	brokenglass	-0.210906954	NZ	Wed Oct 07 2020	Oct	2020	Oct-2020	brokenglass
9043281	brokenglass	-0.210906948	NZ	Wed Oct 07 2020	Oct	2020	Oct-2020	brokenglass
9043280	brokenglass	-0.210907004	NZ	Wed Oct 07 2020	Oct	2020	Oct-2020	plastic	wrapper
9043279	plastic, wrapper	-0.210906948	NZ	Wed Oct 07 2020	Oct	2020	Oct-2020	brokenglass
9043278	brokenglass	-0.21090695	NZ	Wed Oct 07 2020	Oct	2020	Oct-2020	brokenglass
9043277	brokenglass	-0.210907004	NZ	Wed Oct 07 2020	Oct	2020	Oct-2020	plastic	bottlecap
9043276	plastic, bottlecap	-0.210906952	NZ	Wed Oct 07 2020	Oct	2020	Oct-2020	brokenglass
9043275	brokenglass	-0.21090698	NZ	Wed Oct 07 2020	Oct	2020	Oct-2020	brokenglass
9043274	brokenglass	-0.21090693	NZ	Wed Oct 07 2020	Oct	2020	Oct-2020	brokenglass
9043273	brokenglass	-0.210906941	NZ	Wed Oct 07 2020	Oct	2020	Oct-2020	brokenglass
9043272	brokenglass	-0.210907079	NZ	Wed Oct 07 2020	Oct	2020	Oct-2020	brokenglass
9043271	brokenglass	-0.210906941	NZ	Wed Oct 07 2020	Oct	2020	Oct-2020	plastic	syringe
9043270	plastic, syringe	-0.210906771	NZ	Wed Oct 07 2020	Oct	2020	Oct-2020	plastic	dogpoobag
9043269	plastic, dogpoobag	-0.210906789	NZ	Wed Oct 07 2020	Oct	2020	Oct-2020	brokenglass
9043268	brokenglass	-0.210906776	NZ	Wed Oct 07 2020	Oct	2020	Oct-2020	plastic	dogpoobag
9043267	plastic, dogpoobag	-0.210906776	NZ	Wed Oct 07 2020	Oct	2020	Oct-2020	brokenglass
9043266	brokenglass	-0.210906794	NZ	Wed Oct 07 2020	Oct	2020	Oct-2020	piece	plastic
9043265	piece, plastic	-0.210906517	NZ	Wed Oct 07 2020	Oct	2020	Oct-2020	brokenglass
9043264	brokenglass	-0.210906814	NZ	Wed Oct 07 2020	Oct	2020	Oct-2020	brokenglass
9043263	brokenglass	-0.210906744	NZ	Wed Oct 07 2020	Oct	2020	Oct-2020	brokenglass
9043262	brokenglass	-0.2109068	NZ	Wed Oct 07 2020	Oct	2020	Oct-2020	brokenglass
9043261	brokenglass	-0.210906813	NZ	Wed Oct 07 2020	Oct	2020	Oct-2020	plastic	wrapper
9043260	plastic, wrapper	-0.210909395	NZ	Wed Oct 07 2020	Oct	2020	Oct-2020	plastic
9043259	plastic	-0.210910535	NZ	Wed Oct 07 2020	Oct	2020	Oct-2020	plastic
9043258	plastic	-0.210909511	NZ	Wed Oct 07 2020	Oct	2020	Oct-2020	cardboard
9043257	cardboard	-0.210909756	NZ	Wed Oct 07 2020	Oct	2020	Oct-2020	plastic	wrapper
9043256	plastic, wrapper	-0.210910606	NZ	Wed Oct 07 2020	Oct	2020	Oct-2020	plastic	sticker
9043255	plastic, sticker	-0.210908296	NZ	Wed Oct 07 2020	Oct	2020	Oct-2020	plastic
9043254	plastic	-0.21090939	NZ	Wed Oct 07 2020	Oct	2020	Oct-2020	plastic	wrapper
9043253	plastic, wrapper	-0.210908206	NZ	Wed Oct 07 2020	Oct	2020	Oct-2020	plastic	piece
9043252	plastic, piece	-0.21091112	NZ	Wed Oct 07 2020	Oct	2020	Oct-2020	cardboard
9043251	cardboard	-0.210909757	NZ	Wed Oct 07 2020	Oct	2020	Oct-2020	plastic	straw
9043250	plastic, straw	-0.210911056	NZ	Wed Oct 07 2020	Oct	2020	Oct-2020	plastic	wrapper
9043249	plastic, wrapper	-0.210909842	NZ	Wed Oct 07 2020	Oct	2020	Oct-2020	cardboard
9043248	cardboard	-0.210911035	NZ	Wed Oct 07 2020	Oct	2020	Oct-2020	piece	plastic	breadclip
9043247	piece, plastic, breadclip	-0.210910325	NZ	Wed Oct 07 2020	Oct	2020	Oct-2020	plastic	bottlecap
9043246	plastic, bottlecap	-0.210911118	NZ	Wed Oct 07 2020	Oct	2020	Oct-2020	plastic	wrapper
9043245	plastic, wrapper	-0.210911236	NZ	Wed Oct 07 2020	Oct	2020	Oct-2020	plastic	wrapper
9043244	plastic, wrapper	-0.210911198	NZ	Wed Oct 07 2020	Oct	2020	Oct-2020	plastic	soysauceplastic
9043243	plastic, soysauceplastic	-0.210911235	NZ	Wed Oct 07 2020	Oct	2020	Oct-2020	piece	plastic
9043242	piece, plastic	-0.210911241	NZ	Wed Oct 07 2020	Oct	2020	Oct-2020	plastic	lollipopstick
9043241	plastic, lollipopstick	-0.210911162	NZ	Wed Oct 07 2020	Oct	2020	Oct-2020	plastic	piece
9043240	plastic, piece	-0.210911033	NZ	Wed Oct 07 2020	Oct	2020	Oct-2020	cardboard
9043239	cardboard	-0.210912752	NZ	Wed Oct 07 2020	Oct	2020	Oct-2020	cardboard
9043238	cardboard	-0.210911195	NZ	Wed Oct 07 2020	Oct	2020	Oct-2020	plastic	plastic confetti
9043237	plastic, plastic confetti	-0.210912778	NZ	Wed Oct 07 2020	Oct	2020	Oct-2020	plastic	wrapper
9043236	plastic, wrapper	-0.210915125	NZ	Wed Oct 07 2020	Oct	2020	Oct-2020	plastic	wrapper
9043235	plastic, wrapper	-0.210917062	NZ	Wed Oct 07 2020	Oct	2020	Oct-2020	tennis ball
9043234	tennis ball	-0.210916863	NZ	Wed Oct 07 2020	Oct	2020	Oct-2020	plastic
9043233	plastic	-0.21091769	NZ	Wed Oct 07 2020	Oct	2020	Oct-2020	plastic	facemask
9043232	plastic, facemask	-0.210911047	NZ	Wed Oct 07 2020	Oct	2020	Oct-2020	plastic	straw
9043231	plastic, straw	-0.210917495	NZ	Wed Oct 07 2020	Oct	2020	Oct-2020	plastic	piece
9043230	plastic, piece	-0.210917731	NZ	Wed Oct 07 2020	Oct	2020	Oct-2020	plastic	parkingticket
9043229	plastic, parkingticket	-0.210917791	NZ	Wed Oct 07 2020	Oct	2020	Oct-2020	plastic	piece
9043228	plastic, piece	-0.21091771	NZ	Wed Oct 07 2020	Oct	2020	Oct-2020	plastic	wrapper
9043227	plastic, wrapper	-0.210917779	NZ	Wed Oct 07 2020	Oct	2020	Oct-2020	plastic	wrapper
9043226	plastic, wrapper	-0.21091779	NZ	Wed Oct 07 2020	Oct	2020	Oct-2020	plastic	cigarettepack
9043225	plastic, cigarettepack	-0.210917941	NZ	Wed Oct 07 2020	Oct	2020	Oct-2020	plastic	wrapper
9043224	plastic, wrapper	-0.210917802	NZ	Wed Oct 07 2020	Oct	2020	Oct-2020	plastic	wrapper
9043223	plastic, wrapper	-0.21091792	NZ	Wed Oct 07 2020	Oct	2020	Oct-2020	plastic	piece
9043222	plastic, piece	-0.210917731	NZ	Wed Oct 07 2020	Oct	2020	Oct-2020	aluminum	can
9043221	aluminum, can	-0.210917828	NZ	Wed Oct 07 2020	Oct	2020	Oct-2020	plastic	wrapper
9043220	plastic, wrapper	-0.210917887	NZ	Wed Oct 07 2020	Oct	2020	Oct-2020	aluminum	can
9043219	aluminum, can	-0.21091783	NZ	Wed Oct 07 2020	Oct	2020	Oct-2020	plastic	plastic confetti
9043218	plastic, plastic confetti	-0.21091887	NZ	Wed Oct 07 2020	Oct	2020	Oct-2020	plastic	wrapper
9043217	plastic, wrapper	-0.210918022	NZ	Wed Oct 07 2020	Oct	2020	Oct-2020	metal	bottlecap
9043216	metal, bottlecap	-0.210918014	NZ	Wed Oct 07 2020	Oct	2020	Oct-2020	plastic	wrapper
9043215	plastic, wrapper	-0.210916465	NZ	Wed Oct 07 2020	Oct	2020	Oct-2020	plastic	wrapper
9043214	plastic, wrapper	-0.210918786	NZ	Wed Oct 07 2020	Oct	2020	Oct-2020	plastic	bottlecap
9043213	plastic, bottlecap	-0.210917162	NZ	Wed Oct 07 2020	Oct	2020	Oct-2020	plastic	piece
9043212	plastic, piece	-0.210916922	NZ	Wed Oct 07 2020	Oct	2020	Oct-2020	plastic	wrapper
9043211	plastic, wrapper	-0.210918786	NZ	Wed Oct 07 2020	Oct	2020	Oct-2020	plastic	piece
9043210	plastic, piece	-0.210917466	NZ	Wed Oct 07 2020	Oct	2020	Oct-2020	yogurtlid
9043209	yogurtlid	-0.210918786	NZ	Wed Oct 07 2020	Oct	2020	Oct-2020	plastic	wrapper
9043208	plastic, wrapper	-0.210916768	NZ	Wed Oct 07 2020	Oct	2020	Oct-2020	plastic	bottlecap
9043207	plastic, bottlecap	-0.210917162	NZ	Wed Oct 07 2020	Oct	2020	Oct-2020	plastic	wrapper
9043206	plastic, wrapper	-0.21091654	NZ	Wed Oct 07 2020	Oct	2020	Oct-2020	plastic	wrapper
9043205	plastic, wrapper	-0.210916334	NZ	Wed Oct 07 2020	Oct	2020	Oct-2020	plastic	piece
9043204	plastic, piece	-0.210916948	NZ	Wed Oct 07 2020	Oct	2020	Oct-2020	metal	bottlecap
9043203	metal, bottlecap	-0.210916664	NZ	Wed Oct 07 2020	Oct	2020	Oct-2020	plastic	wrapper
9043202	plastic, wrapper	-0.210916615	NZ	Wed Oct 07 2020	Oct	2020	Oct-2020	plastic	wrapper
9043201	plastic, wrapper	-0.210916913	NZ	Wed Oct 07 2020	Oct	2020	Oct-2020	plastic	wrapper
9043200	plastic, wrapper	-0.210916128	NZ	Wed Oct 07 2020	Oct	2020	Oct-2020	metal	bottlecap
9043199	metal, bottlecap	-0.210915512	NZ	Wed Oct 07 2020	Oct	2020	Oct-2020	plastic	wrapper
9043198	plastic, wrapper	-0.210916057	NZ	Wed Oct 07 2020	Oct	2020	Oct-2020	plastic	wrapper
9043197	plastic, wrapper	-0.210916088	NZ	Wed Oct 07 2020	Oct	2020	Oct-2020	metal	bottlecap
9043196	metal, bottlecap	-0.210915599	NZ	Wed Oct 07 2020	Oct	2020	Oct-2020	plastic	wrapper
9043195	plastic, wrapper	-0.210915997	NZ	Wed Oct 07 2020	Oct	2020	Oct-2020	metal	bottlecap
9043194	metal, bottlecap	-0.210915509	NZ	Wed Oct 07 2020	Oct	2020	Oct-2020	plastic	wrapper
9043193	plastic, wrapper	-0.210915999	NZ	Wed Oct 07 2020	Oct	2020	Oct-2020	plastic	wrapper
9043192	plastic, wrapper	-0.21091601	NZ	Wed Oct 07 2020	Oct	2020	Oct-2020	plastic	plastic confetti
9043191	plastic, plastic confetti	-0.210915665	NZ	Wed Oct 07 2020	Oct	2020	Oct-2020	wood	cutlery
9043190	wood, cutlery	-0.210915829	NZ	Wed Oct 07 2020	Oct	2020	Oct-2020	plastic	cutlery
9043189	plastic, cutlery	-0.210915776	NZ	Wed Oct 07 2020	Oct	2020	Oct-2020	plastic	piece
9043188	plastic, piece	-0.210915712	NZ	Wed Oct 07 2020	Oct	2020	Oct-2020	plastic	plastic confetti
9043187	plastic, plastic confetti	-0.210915867	NZ	Wed Oct 07 2020	Oct	2020	Oct-2020	plastic	strawwrapper
9043186	plastic, strawwrapper	-0.210915456	NZ	Wed Oct 07 2020	Oct	2020	Oct-2020	cardboard
9043185	cardboard	-0.210915548	NZ	Wed Oct 07 2020	Oct	2020	Oct-2020	plastic	hairtie
9043184	plastic, hairtie	-0.210915727	NZ	Wed Oct 07 2020	Oct	2020	Oct-2020	plastic	piece
9043183	plastic, piece	-0.210915865	NZ	Wed Oct 07 2020	Oct	2020	Oct-2020	plastic	piece
9043182	plastic, piece	-0.210915919	NZ	Wed Oct 07 2020	Oct	2020	Oct-2020	metal	bottlecap
9043181	metal, bottlecap	-0.210915649	NZ	Wed Oct 07 2020	Oct	2020	Oct-2020	cardboard
9043180	cardboard	-0.210915812	NZ	Wed Oct 07 2020	Oct	2020	Oct-2020	metal	bottlecap
9043179	metal, bottlecap	-0.210915652	NZ	Wed Oct 07 2020	Oct	2020	Oct-2020	plastic	piece
9043178	plastic, piece	-0.210915576	NZ	Wed Oct 07 2020	Oct	2020	Oct-2020	cardboard
9043177	cardboard	-0.210915666	NZ	Wed Oct 07 2020	Oct	2020	Oct-2020	metal	bottlecap
9043176	metal, bottlecap	-0.210915535	NZ	Wed Oct 07 2020	Oct	2020	Oct-2020	plastic	piece
9043175	plastic, piece	-0.210915498	NZ	Wed Oct 07 2020	Oct	2020	Oct-2020	plastic	wrapper
9043174	plastic, wrapper	-0.210915517	NZ	Wed Oct 07 2020	Oct	2020	Oct-2020	plastic	piece
9043173	plastic, piece	-0.210915583	NZ	Wed Oct 07 2020	Oct	2020	Oct-2020	metal	bottlecap
9043172	metal, bottlecap	-0.210915596	NZ	Wed Oct 07 2020	Oct	2020	Oct-2020	plastic	piece
9043171	plastic, piece	-0.210915562	NZ	Wed Oct 07 2020	Oct	2020	Oct-2020	plastic	polystyrene
9043170	plastic, polystyrene	-0.210909116	NZ	Wed Oct 07 2020	Oct	2020	Oct-2020	plastic	hairtie
9043169	plastic, hairtie	-0.210915543	NZ	Wed Oct 07 2020	Oct	2020	Oct-2020	plastic	polystyrene
9043168	plastic, polystyrene	-0.210908997	NZ	Wed Oct 07 2020	Oct	2020	Oct-2020	plastic	piece
9043167	plastic, piece	-0.210915298	NZ	Wed Oct 07 2020	Oct	2020	Oct-2020	plastic	bottlecap
9043166	plastic, bottlecap	-0.21091533	NZ	Wed Oct 07 2020	Oct	2020	Oct-2020	plastic	piece
9043165	plastic, piece	-0.210915503	NZ	Wed Oct 07 2020	Oct	2020	Oct-2020	plastic	piece
9043164	plastic, piece	-0.210915259	NZ	Wed Oct 07 2020	Oct	2020	Oct-2020	plastic	piece
9043163	plastic, piece	-0.210910591	NZ	Wed Oct 07 2020	Oct	2020	Oct-2020	plastic	polystyrene
9043162	plastic, polystyrene	-0.210908993	NZ	Wed Oct 07 2020	Oct	2020	Oct-2020	metal	bottlecap
9043161	metal, bottlecap	-0.210915487	NZ	Wed Oct 07 2020	Oct	2020	Oct-2020	plastic	polystyrene
9043160	plastic, polystyrene	-0.210908997	NZ	Wed Oct 07 2020	Oct	2020	Oct-2020	plastic	polystyrene
9043159	plastic, polystyrene	-0.210908993	NZ	Wed Oct 07 2020	Oct	2020	Oct-2020	plastic	polystyrene
9043158	plastic, polystyrene	-0.210908997	NZ	Wed Oct 07 2020	Oct	2020	Oct-2020	plastic	polystyrene
9043157	plastic, polystyrene	-0.210909051	NZ	Wed Oct 07 2020	Oct	2020	Oct-2020	plastic	polystyrene
9043156	plastic, polystyrene	-0.210908993	NZ	Wed Oct 07 2020	Oct	2020	Oct-2020	plastic	piece
9043155	plastic, piece	-0.210905289	NZ	Wed Oct 07 2020	Oct	2020	Oct-2020	aluminum	can
9043154	aluminum, can	-0.210905679	NZ	Wed Oct 07 2020	Oct	2020	Oct-2020	plastic	wrapper
9043153	plastic, wrapper	-0.210905784	NZ	Wed Oct 07 2020	Oct	2020	Oct-2020	plastic	piece
9043152	plastic, piece	-0.210904932	NZ	Wed Oct 07 2020	Oct	2020	Oct-2020	plastic	piece
9043151	plastic, piece	-0.210905231	NZ	Wed Oct 07 2020	Oct	2020	Oct-2020	plastic	piece
9043150	plastic, piece	-0.210905231	NZ	Wed Oct 07 2020	Oct	2020	Oct-2020	plastic	polystyrene
9043149	plastic, polystyrene	-0.210905531	NZ	Wed Oct 07 2020	Oct	2020	Oct-2020	plastic	wrapper
9043148	plastic, wrapper	-0.210908753	NZ	Wed Oct 07 2020	Oct	2020	Oct-2020	plastic	polystyrene
9043147	plastic, polystyrene	-0.210906353	NZ	Wed Oct 07 2020	Oct	2020	Oct-2020	plastic	piece
9043146	plastic, piece	-0.210905531	NZ	Wed Oct 07 2020	Oct	2020	Oct-2020	plastic	wrapper
9043145	plastic, wrapper	-0.210906173	NZ	Wed Oct 07 2020	Oct	2020	Oct-2020	plastic	polystyrene
9043144	plastic, polystyrene	-0.210908878	NZ	Wed Oct 07 2020	Oct	2020	Oct-2020	plastic	wrapper
9043143	plastic, wrapper	-0.210908574	NZ	Wed Oct 07 2020	Oct	2020	Oct-2020	plastic	polystyrene
9043142	plastic, polystyrene	-0.210906296	NZ	Wed Oct 07 2020	Oct	2020	Oct-2020	plastic	piece
9043141	plastic, piece	-0.210904884	NZ	Wed Oct 07 2020	Oct	2020	Oct-2020	plastic	polystyrene
9042727	plastic, polystyrene	-0.210897304	NZ	Wed Oct 07 2020	Oct	2020	Oct-2020	aluminium	piece
9042720	aluminium, piece	-0.210891775	NZ	Wed Oct 07 2020	Oct	2020	Oct-2020	glass	bottle
9039676	glass, bottle	-0.22967522	NZ	Tue Oct 06 2020	Oct	2020	Oct-2020	plastic
9039675	plastic	-0.229673199	NZ	Tue Oct 06 2020	Oct	2020	Oct-2020	metal	can tab
9025182	metal, can tab	-0.229842273	NZ	Tue Oct 06 2020	Oct	2020	Oct-2020	plastic	tape
9025181	plastic, tape	-0.2298416	NZ	Tue Oct 06 2020	Oct	2020	Oct-2020	plastic	breadtag
9025180	plastic, breadtag	-0.229844795	NZ	Tue Oct 06 2020	Oct	2020	Oct-2020	plastic	wrapper
9025179	plastic, wrapper	-0.229841926	NZ	Tue Oct 06 2020	Oct	2020	Oct-2020	plastic	plasticlid	straw
9025178	plastic, plasticlid, straw	-0.229841562	NZ	Tue Oct 06 2020	Oct	2020	Oct-2020	plastic	tape
9025177	plastic, tape	-0.229841616	NZ	Tue Oct 06 2020	Oct	2020	Oct-2020	plastic
9025176	plastic	-0.229862142	NZ	Tue Oct 06 2020	Oct	2020	Oct-2020	plastic	lollipopstick
9025175	plastic, lollipopstick	-0.229843841	NZ	Tue Oct 06 2020	Oct	2020	Oct-2020	plastic	lid
9025174	plastic, lid	-0.229843897	NZ	Tue Oct 06 2020	Oct	2020	Oct-2020	plastic	piece
9025173	plastic, piece	-0.229843841	NZ	Tue Oct 06 2020	Oct	2020	Oct-2020	cutlery	fork	plastic
9025172	cutlery, fork, plastic	-0.229849973	NZ	Tue Oct 06 2020	Oct	2020	Oct-2020	plastic	bag
9025171	plastic, bag	-0.229862125	NZ	Tue Oct 06 2020	Oct	2020	Oct-2020	bottlecap	plastic
9025170	bottlecap, plastic	-0.22986213	NZ	Tue Oct 06 2020	Oct	2020	Oct-2020	plastic	straw
9025169	plastic, straw	-0.229862125	NZ	Tue Oct 06 2020	Oct	2020	Oct-2020	plastic
9024168	plastic	-0.229861979	NZ	Tue Oct 06 2020	Oct	2020	Oct-2020	plastic
9024167	plastic	-0.229864539	NZ	Tue Oct 06 2020	Oct	2020	Oct-2020	plastic	bottlecap
9024166	plastic, bottlecap	-0.229869782	NZ	Tue Oct 06 2020	Oct	2020	Oct-2020	bottle	plastic
9024165	bottle, plastic	-0.229864539	NZ	Tue Oct 06 2020	Oct	2020	Oct-2020	plastic
9024164	plastic	-0.229864539	NZ	Tue Oct 06 2020	Oct	2020	Oct-2020	plastic	bottle
9021098	plastic, bottle	-0.229702754	NZ	Mon Oct 05 2020	Oct	2020	Oct-2020	polystyrene
9021097	polystyrene	-0.229705357	NZ	Mon Oct 05 2020	Oct	2020	Oct-2020	plastic	bottle
9021096	plastic, bottle	-0.229705995	NZ	Mon Oct 05 2020	Oct	2020	Oct-2020	plastic	lollipopstick
9018353	plastic, lollipopstick	-0.229703413	NZ	Mon Oct 05 2020	Oct	2020	Oct-2020	can	aluminum
9018352	can, aluminum	-0.229685953	NZ	Mon Oct 05 2020	Oct	2020	Oct-2020	shoelace
9018351	shoelace	-0.229700294	NZ	Mon Oct 05 2020	Oct	2020	Oct-2020	cardboard
9018350	cardboard	-0.229681171	NZ	Mon Oct 05 2020	Oct	2020	Oct-2020	plastic	golf ball
9018349	plastic, golf ball	-0.229703955	NZ	Mon Oct 05 2020	Oct	2020	Oct-2020	plastic	bag
9018348	plastic, bag	-0.229668922	NZ	Mon Oct 05 2020	Oct	2020	Oct-2020	bag	plastic
9018347	bag, plastic	-0.229673525	NZ	Mon Oct 05 2020	Oct	2020	Oct-2020	plastic	clingwrap
9018346	plastic, clingwrap	-0.229675545	NZ	Mon Oct 05 2020	Oct	2020	Oct-2020	plastic	mcdonalds	cup	straw	lid
9018345	plastic, mcdonalds, cup, straw, lid	-0.229673228	NZ	Mon Oct 05 2020	Oct	2020	Oct-2020	plastic	mcdonalds	cup	straw	lid
9018344	plastic, mcdonalds, cup, straw, lid	-0.229671638	NZ	Mon Oct 05 2020	Oct	2020	Oct-2020	plastic	wrapper
9018343	plastic, wrapper	-0.229669059	NZ	Mon Oct 05 2020	Oct	2020	Oct-2020	plastic	bag
9018342	plastic, bag	-0.229670202	NZ	Mon Oct 05 2020	Oct	2020	Oct-2020	plastic	bag
9018341	plastic, bag	-0.229670455	NZ	Mon Oct 05 2020	Oct	2020	Oct-2020	plastic	bag
9018340	plastic, bag	-0.229670013	NZ	Mon Oct 05 2020	Oct	2020	Oct-2020	plastic	bag
9018339	plastic, bag	-0.229670087	NZ	Mon Oct 05 2020	Oct	2020	Oct-2020	can	aluminum
9018338	can, aluminum	-0.229670682	NZ	Mon Oct 05 2020	Oct	2020	Oct-2020	plastic	bag
9018337	plastic, bag	-0.229670679	NZ	Mon Oct 05 2020	Oct	2020	Oct-2020	plastic
9018336	plastic	-0.229670039	NZ	Mon Oct 05 2020	Oct	2020	Oct-2020	can	aluminum
9018335	can, aluminum	-0.22967068	NZ	Mon Oct 05 2020	Oct	2020	Oct-2020	plastic	wrapper
9018334	plastic, wrapper	-0.229670678	NZ	Mon Oct 05 2020	Oct	2020	Oct-2020	plastic	bag
9018333	plastic, bag	-0.229670678	NZ	Mon Oct 05 2020	Oct	2020	Oct-2020	can	aluminum
9018332	can, aluminum	-0.22967068	NZ	Mon Oct 05 2020	Oct	2020	Oct-2020	plastic	bag
9018331	plastic, bag	-0.229670517	NZ	Mon Oct 05 2020	Oct	2020	Oct-2020	plastic	bag
9018330	plastic, bag	-0.229670673	NZ	Mon Oct 05 2020	Oct	2020	Oct-2020	plastic	bag
9018329	plastic, bag	-0.229670433	NZ	Mon Oct 05 2020	Oct	2020	Oct-2020	plastic	wrapper
9018328	plastic, wrapper	-0.229670362	NZ	Mon Oct 05 2020	Oct	2020	Oct-2020	plastic	wrapper
9018327	plastic, wrapper	-0.229670606	NZ	Mon Oct 05 2020	Oct	2020	Oct-2020	plastic	bag
9018326	plastic, bag	-0.229670359	NZ	Mon Oct 05 2020	Oct	2020	Oct-2020	can	aluminum
9018325	can, aluminum	-0.229670397	NZ	Mon Oct 05 2020	Oct	2020	Oct-2020	plastic	wrapper
9018324	plastic, wrapper	-0.229670549	NZ	Mon Oct 05 2020	Oct	2020	Oct-2020	plastic	wrapper
9018323	plastic, wrapper	-0.229670619	NZ	Mon Oct 05 2020	Oct	2020	Oct-2020	plastic
9018322	plastic	-0.229670493	NZ	Mon Oct 05 2020	Oct	2020	Oct-2020	can	aluminum
9018321	can, aluminum	-0.229670509	NZ	Mon Oct 05 2020	Oct	2020	Oct-2020	plastic	wrapper
9018320	plastic, wrapper	-0.229670446	NZ	Mon Oct 05 2020	Oct	2020	Oct-2020	plastic	straw
9018319	plastic, straw	-0.229670372	NZ	Mon Oct 05 2020	Oct	2020	Oct-2020	plastic	piece
9018318	plastic, piece	-0.22967037	NZ	Mon Oct 05 2020	Oct	2020	Oct-2020	plastic	bag
9018317	plastic, bag	-0.229670466	NZ	Mon Oct 05 2020	Oct	2020	Oct-2020	plastic	wrapper
9018315	plastic, wrapper	-0.229670368	NZ	Mon Oct 05 2020	Oct	2020	Oct-2020	plastic	wrapper
9018314	plastic, wrapper	-0.229670619	NZ	Mon Oct 05 2020	Oct	2020	Oct-2020	plastic
9018313	plastic	-0.229669775	NZ	Mon Oct 05 2020	Oct	2020	Oct-2020	plastic	bag
9018312	plastic, bag	-0.229670095	NZ	Mon Oct 05 2020	Oct	2020	Oct-2020	plastic
9018311	plastic	-0.229670388	NZ	Mon Oct 05 2020	Oct	2020	Oct-2020	plastic	wrapper
9018310	plastic, wrapper	-0.229669333	NZ	Mon Oct 05 2020	Oct	2020	Oct-2020	plastic	bag
9018309	plastic, bag	-0.229669521	NZ	Mon Oct 05 2020	Oct	2020	Oct-2020	plastic	wrapper
9018308	plastic, wrapper	-0.229670113	NZ	Mon Oct 05 2020	Oct	2020	Oct-2020	balloon
9018307	balloon	-0.229669155	NZ	Mon Oct 05 2020	Oct	2020	Oct-2020	plastic	piece
9018306	plastic, piece	-0.229669416	NZ	Mon Oct 05 2020	Oct	2020	Oct-2020	plastic	bag
9018305	plastic, bag	-0.229687661	NZ	Mon Oct 05 2020	Oct	2020	Oct-2020	plastic	wrapper
9018304	plastic, wrapper	-0.22966917	NZ	Mon Oct 05 2020	Oct	2020	Oct-2020	plastic	bag
9018303	plastic, bag	-0.229669735	NZ	Mon Oct 05 2020	Oct	2020	Oct-2020	plastic	bag
9018302	plastic, bag	-0.229687715	NZ	Mon Oct 05 2020	Oct	2020	Oct-2020	plastic	bag
9018301	plastic, bag	-0.229669659	NZ	Mon Oct 05 2020	Oct	2020	Oct-2020	plastic	bag
9018300	plastic, bag	-0.229687637	NZ	Mon Oct 05 2020	Oct	2020	Oct-2020	plastic	wrapper
9018299	plastic, wrapper	-0.22966978	NZ	Mon Oct 05 2020	Oct	2020	Oct-2020	fabric
9018298	fabric	-0.229734236	NZ	Mon Oct 05 2020	Oct	2020	Oct-2020	plastic	bag
9018297	plastic, bag	-0.229687823	NZ	Mon Oct 05 2020	Oct	2020	Oct-2020	plastic	bag
9018296	plastic, bag	-0.229687838	NZ	Mon Oct 05 2020	Oct	2020	Oct-2020	plastic	golf ball
9018295	plastic, golf ball	-0.229709226	NZ	Mon Oct 05 2020	Oct	2020	Oct-2020	plastic	piece
9018294	plastic, piece	-0.229710567	NZ	Mon Oct 05 2020	Oct	2020	Oct-2020	plastic	bag
9018293	plastic, bag	-0.229687828	NZ	Mon Oct 05 2020	Oct	2020	Oct-2020	plastic	wrapper
9018292	plastic, wrapper	-0.229713426	NZ	Mon Oct 05 2020	Oct	2020	Oct-2020	plastic	bag
9018291	plastic, bag	-0.229687828	NZ	Mon Oct 05 2020	Oct	2020	Oct-2020	plastic	bag
9018290	plastic, bag	-0.22968772	NZ	Mon Oct 05 2020	Oct	2020	Oct-2020	plastic	piece
9018289	plastic, piece	-0.229730074	NZ	Mon Oct 05 2020	Oct	2020	Oct-2020	plastic	bag
9018288	plastic, bag	-0.22970998	NZ	Mon Oct 05 2020	Oct	2020	Oct-2020	plastic	piece
9018287	plastic, piece	-0.229730423	NZ	Mon Oct 05 2020	Oct	2020	Oct-2020	plastic	wrapper
9018286	plastic, wrapper	-0.229733888	NZ	Mon Oct 05 2020	Oct	2020	Oct-2020	plastic	wrapper
9018285	plastic, wrapper	-0.229730162	NZ	Mon Oct 05 2020	Oct	2020	Oct-2020	plastic	wrapper
9018283	plastic, wrapper	-0.229726169	NZ	Mon Oct 05 2020	Oct	2020	Oct-2020	plastic	lid	bottle
9018282	plastic, lid, bottle	-0.229724316	NZ	Mon Oct 05 2020	Oct	2020	Oct-2020	bottle	glass
9018281	bottle, glass	-0.229717797	NZ	Mon Oct 05 2020	Oct	2020	Oct-2020	can	aluminum
9018280	can, aluminum	-0.229701108	NZ	Mon Oct 05 2020	Oct	2020	Oct-2020	bottle	glass
9018279	bottle, glass	-0.229710788	NZ	Mon Oct 05 2020	Oct	2020	Oct-2020	plastic	wrapper
9018278	plastic, wrapper	-0.229714031	NZ	Mon Oct 05 2020	Oct	2020	Oct-2020	can	aluminum
9018277	can, aluminum	-0.229712343	NZ	Mon Oct 05 2020	Oct	2020	Oct-2020	piece	plastic
9018276	piece, plastic	-0.229714993	NZ	Mon Oct 05 2020	Oct	2020	Oct-2020	bottle	plastic
9018275	bottle, plastic	-0.22972922	NZ	Mon Oct 05 2020	Oct	2020	Oct-2020	balloon
9018274	balloon	-0.229723114	NZ	Mon Oct 05 2020	Oct	2020	Oct-2020	plastic	piece
9018273	plastic, piece	-0.229728618	NZ	Mon Oct 05 2020	Oct	2020	Oct-2020	plastic	bottle
9018272	plastic, bottle	-0.229706128	NZ	Mon Oct 05 2020	Oct	2020	Oct-2020	plastic	lid	bottle
9018271	plastic, lid, bottle	-0.229729124	NZ	Mon Oct 05 2020	Oct	2020	Oct-2020	plastic	plantlabel
9018270	plastic, plantlabel	-0.229728997	NZ	Mon Oct 05 2020	Oct	2020	Oct-2020	plastic	lid
9018269	plastic, lid	-0.229728763	NZ	Mon Oct 05 2020	Oct	2020	Oct-2020	rubberband	rubber
9002201	rubberband, rubber	-0.236278813	NZ	Mon Oct 05 2020	Oct	2020	Oct-2020	rubberband	rubber
9002199	rubberband, rubber	-0.236276594	NZ	Mon Oct 05 2020	Oct	2020	Oct-2020	celluloseacetate	cigarettebutt
9002198	celluloseacetate, cigarettebutt	-0.236311662	NZ	Mon Oct 05 2020	Oct	2020	Oct-2020	tetrapak	sanatarium	up and go
9002197	tetrapak, sanatarium, up and go	-0.23627486	NZ	Mon Oct 05 2020	Oct	2020	Oct-2020	plastic
9002196	plastic	-0.236300028	NZ	Mon Oct 05 2020	Oct	2020	Oct-2020	aluminum	can	energydrink	v
9002194	aluminum, can, energydrink, v	-0.236305725	NZ	Mon Oct 05 2020	Oct	2020	Oct-2020	bottlecap	metal	heineken
9002192	bottlecap, metal, heineken	-0.236304701	NZ	Mon Oct 05 2020	Oct	2020	Oct-2020	monteiths	beerpackaging	cardboard
9002190	monteiths, beerpackaging, cardboard	-0.236303752	NZ	Mon Oct 05 2020	Oct	2020	Oct-2020	bottlecap	plastic
9002189	bottlecap, plastic	-0.236285839	NZ	Mon Oct 05 2020	Oct	2020	Oct-2020	glass
9002188	glass	-0.236290493	NZ	Mon Oct 05 2020	Oct	2020	Oct-2020	plastic	spoon
9002187	plastic, spoon	-0.236309272	NZ	Mon Oct 05 2020	Oct	2020	Oct-2020	plastic	ziptie
9002186	plastic, ziptie	-0.236279979	NZ	Mon Oct 05 2020	Oct	2020	Oct-2020	wrapper	chipsbag
8967077	wrapper, chipsbag	-0.236283846	NZ	Sun Oct 04 2020	Oct	2020	Oct-2020	plastic	covidtrash
8964547	plastic, covidtrash	-0.229713796	NZ	Sun Oct 04 2020	Oct	2020	Oct-2020	plastic	covidtrash
8964545	plastic, covidtrash	-0.22971395	NZ	Sun Oct 04 2020	Oct	2020	Oct-2020	aluminum	can
8964544	aluminum, can	-0.22970497	NZ	Sun Oct 04 2020	Oct	2020	Oct-2020	plastic	pen
8904521	plastic, pen	-0.236274456	NZ	Sun Oct 04 2020	Oct	2020	Oct-2020	plastic
8904519	plastic	-0.236307508	NZ	Sun Oct 04 2020	Oct	2020	Oct-2020	plastic	straw
8904518	plastic, straw	-0.236308276	NZ	Sun Oct 04 2020	Oct	2020	Oct-2020	aluminum	can
8904517	aluminum, can	-0.236304254	NZ	Sun Oct 04 2020	Oct	2020	Oct-2020	plastic
8904516	plastic	-0.236303725	NZ	Sun Oct 04 2020	Oct	2020	Oct-2020	celluloseacetate	cigarettebutt
8904515	celluloseacetate, cigarettebutt	-0.236312147	NZ	Sun Oct 04 2020	Oct	2020	Oct-2020	bottlecap	metal
8904514	bottlecap, metal	-0.236291594	NZ	Sun Oct 04 2020	Oct	2020	Oct-2020	rubber
8904513	rubber	-0.236283374	NZ	Sun Oct 04 2020	Oct	2020	Oct-2020	plastic
8904512	plastic	-0.236307905	NZ	Sun Oct 04 2020	Oct	2020	Oct-2020	plastic	milkbottleseal
8904511	plastic, milkbottleseal	-0.236270647	NZ	Sun Oct 04 2020	Oct	2020	Oct-2020	plastic	tape
8904510	plastic, tape	-0.236275394	NZ	Sun Oct 04 2020	Oct	2020	Oct-2020	plastic	bead
8902194	plastic, bead	-0.236280377	NZ	Sat Oct 03 2020	Oct	2020	Oct-2020	bottle	drink	powerade
8902193	bottle, drink, powerade	-0.236329471	NZ	Sat Oct 03 2020	Oct	2020	Oct-2020	celluloseacetate	cigarettebutt
8902192	celluloseacetate, cigarettebutt	-0.236310259	NZ	Sat Oct 03 2020	Oct	2020	Oct-2020	plastic	telephonebook
8902191	plastic, telephonebook	-0.236321076	NZ	Sat Oct 03 2020	Oct	2020	Oct-2020	bottle	plastic	fanta
8902190	bottle, plastic, fanta	-0.236320499	NZ	Sat Oct 03 2020	Oct	2020	Oct-2020	bottlecap	plastic
8902189	bottlecap, plastic	-0.236307467	NZ	Sat Oct 03 2020	Oct	2020	Oct-2020	plastic	wire
8902188	plastic, wire	-0.236304922	NZ	Sat Oct 03 2020	Oct	2020	Oct-2020	rubber
8902187	rubber	-0.236295499	NZ	Sat Oct 03 2020	Oct	2020	Oct-2020	aluminum	can	v
8902186	aluminum, can, v	-0.236329408	NZ	Sat Oct 03 2020	Oct	2020	Oct-2020	celluloseacetate	cigarettebutt
8902185	celluloseacetate, cigarettebutt	-0.23629088	NZ	Sat Oct 03 2020	Oct	2020	Oct-2020	kodak	battery
8902184	kodak, battery	-0.236300685	NZ	Sat Oct 03 2020	Oct	2020	Oct-2020	plastic
8902183	plastic	-0.236306446	NZ	Sat Oct 03 2020	Oct	2020	Oct-2020	bottlecap	plastic
8902182	bottlecap, plastic	-0.236307627	NZ	Sat Oct 03 2020	Oct	2020	Oct-2020	celluloseacetate	cigarettebutt
8902181	celluloseacetate, cigarettebutt	-0.236335518	NZ	Sat Oct 03 2020	Oct	2020	Oct-2020	paper	realestate	advertising
8902180	paper, realestate, advertising	-0.236311601	NZ	Sat Oct 03 2020	Oct	2020	Oct-2020	celluloseacetate	cigarettebutt
8902179	celluloseacetate, cigarettebutt	-0.236309147	NZ	Sat Oct 03 2020	Oct	2020	Oct-2020	can	aluminum
8876841	can, aluminum	-0.229701461	NZ	Sat Oct 03 2020	Oct	2020	Oct-2020	plastic	piece
8876840	plastic, piece	-0.22971545	NZ	Sat Oct 03 2020	Oct	2020	Oct-2020	plastic	wrapper
8876516	plastic, wrapper	-0.229710348	NZ	Sat Oct 03 2020	Oct	2020	Oct-2020	piece	plastic	plastic confetti
8876515	piece, plastic, plastic confetti	-0.229709762	NZ	Sat Oct 03 2020	Oct	2020	Oct-2020	polystyrene	plastic
8876514	polystyrene, plastic	-0.229715111	NZ	Sat Oct 03 2020	Oct	2020	Oct-2020	plastic	piece
8876513	plastic, piece	-0.229711514	NZ	Sat Oct 03 2020	Oct	2020	Oct-2020	plastic	golf ball
8876512	plastic, golf ball	-0.229716549	NZ	Sat Oct 03 2020	Oct	2020	Oct-2020	plastic	piece
8876511	plastic, piece	-0.229710413	NZ	Sat Oct 03 2020	Oct	2020	Oct-2020	polystyrene	plastic
8876510	polystyrene, plastic	-0.229696155	NZ	Sat Oct 03 2020	Oct	2020	Oct-2020	plastic	dogpoobag
8876508	plastic, dogpoobag	-0.229715882	NZ	Sat Oct 03 2020	Oct	2020	Oct-2020	polystyrene	plastic
8876507	polystyrene, plastic	-0.22971598	NZ	Sat Oct 03 2020	Oct	2020	Oct-2020	plastic	piece
8876506	plastic, piece	-0.229713823	NZ	Sat Oct 03 2020	Oct	2020	Oct-2020	plastic
8876505	plastic	-0.229695762	NZ	Sat Oct 03 2020	Oct	2020	Oct-2020	can	aluminum
8876504	can, aluminum	-0.22971668	NZ	Sat Oct 03 2020	Oct	2020	Oct-2020	plastic	piece
8876501	plastic, piece	-0.229695555	NZ	Sat Oct 03 2020	Oct	2020	Oct-2020	plastic	piece
8876500	plastic, piece	-0.229695232	NZ	Sat Oct 03 2020	Oct	2020	Oct-2020	plastic	piece
8876499	plastic, piece	-0.229695232	NZ	Sat Oct 03 2020	Oct	2020	Oct-2020	plastic	piece
8876498	plastic, piece	-0.229695537	NZ	Sat Oct 03 2020	Oct	2020	Oct-2020	polystyrene	plastic
8876497	polystyrene, plastic	-0.229695696	NZ	Sat Oct 03 2020	Oct	2020	Oct-2020	plastic	piece
8876494	plastic, piece	-0.229695393	NZ	Sat Oct 03 2020	Oct	2020	Oct-2020	plastic	piece
8876493	plastic, piece	-0.229695226	NZ	Sat Oct 03 2020	Oct	2020	Oct-2020	plastic	piece
8876492	plastic, piece	-0.229691707	NZ	Sat Oct 03 2020	Oct	2020	Oct-2020	plastic	piece
8876489	plastic, piece	-0.229695246	NZ	Sat Oct 03 2020	Oct	2020	Oct-2020	plastic	piece
8876488	plastic, piece	-0.229694203	NZ	Sat Oct 03 2020	Oct	2020	Oct-2020	plastic	piece
8876487	plastic, piece	-0.229691723	NZ	Sat Oct 03 2020	Oct	2020	Oct-2020	plastic	piece
8876486	plastic, piece	-0.229694162	NZ	Sat Oct 03 2020	Oct	2020	Oct-2020	plastic	piece
8876483	plastic, piece	-0.229695206	NZ	Sat Oct 03 2020	Oct	2020	Oct-2020	plastic	wrapper
8876482	plastic, wrapper	-0.229695762	NZ	Sat Oct 03 2020	Oct	2020	Oct-2020	plastic	piece
8876481	plastic, piece	-0.229691695	NZ	Sat Oct 03 2020	Oct	2020	Oct-2020	plastic	piece
8876468	plastic, piece	-0.229691688	NZ	Sat Oct 03 2020	Oct	2020	Oct-2020	plastic	piece
8876467	plastic, piece	-0.229691615	NZ	Sat Oct 03 2020	Oct	2020	Oct-2020	plastic	piece
8876466	plastic, piece	-0.229691688	NZ	Sat Oct 03 2020	Oct	2020	Oct-2020	plastic	piece
8876465	plastic, piece	-0.229691091	NZ	Sat Oct 03 2020	Oct	2020	Oct-2020	plastic	piece
8876464	plastic, piece	-0.229691041	NZ	Sat Oct 03 2020	Oct	2020	Oct-2020	plastic	clingwrap
8876463	plastic, clingwrap	-0.22969104	NZ	Sat Oct 03 2020	Oct	2020	Oct-2020	plastic	piece
8876461	plastic, piece	-0.229691615	NZ	Sat Oct 03 2020	Oct	2020	Oct-2020	plastic	piece
8876457	plastic, piece	-0.22969111	NZ	Sat Oct 03 2020	Oct	2020	Oct-2020	plastic	clingwrap
8876456	plastic, clingwrap	-0.229691619	NZ	Sat Oct 03 2020	Oct	2020	Oct-2020	plastic	piece
8876455	plastic, piece	-0.229691673	NZ	Sat Oct 03 2020	Oct	2020	Oct-2020	plastic	piece
8876452	plastic, piece	-0.229691722	NZ	Sat Oct 03 2020	Oct	2020	Oct-2020	plastic	piece
8876449	plastic, piece	-0.229691382	NZ	Sat Oct 03 2020	Oct	2020	Oct-2020	plastic	piece
8876447	plastic, piece	-0.229691241	NZ	Sat Oct 03 2020	Oct	2020	Oct-2020	plastic	piece
8876445	plastic, piece	-0.229691358	NZ	Sat Oct 03 2020	Oct	2020	Oct-2020	polystyrene	plastic
8876444	polystyrene, plastic	-0.229691068	NZ	Sat Oct 03 2020	Oct	2020	Oct-2020	plastic	piece
8876438	plastic, piece	-0.22969095	NZ	Sat Oct 03 2020	Oct	2020	Oct-2020	plastic	piece
8876436	plastic, piece	-0.229691035	NZ	Sat Oct 03 2020	Oct	2020	Oct-2020	plastic	piece
8876433	plastic, piece	-0.229690963	NZ	Sat Oct 03 2020	Oct	2020	Oct-2020	plastic	clingwrap
8876431	plastic, clingwrap	-0.229690991	NZ	Sat Oct 03 2020	Oct	2020	Oct-2020	plastic	piece
8876430	plastic, piece	-0.229690972	NZ	Sat Oct 03 2020	Oct	2020	Oct-2020	polystyrene	plastic
8876429	polystyrene, plastic	-0.229690948	NZ	Sat Oct 03 2020	Oct	2020	Oct-2020	plastic	piece
8876428	plastic, piece	-0.229690941	NZ	Sat Oct 03 2020	Oct	2020	Oct-2020	polystyrene	plastic
8876426	polystyrene, plastic	-0.229691052	NZ	Sat Oct 03 2020	Oct	2020	Oct-2020	plastic	piece
8876419	plastic, piece	-0.22969102	NZ	Sat Oct 03 2020	Oct	2020	Oct-2020	plastic	piece
8876417	plastic, piece	-0.229691061	NZ	Sat Oct 03 2020	Oct	2020	Oct-2020	plastic	piece
8876413	plastic, piece	-0.229691031	NZ	Sat Oct 03 2020	Oct	2020	Oct-2020	plastic	piece
8876412	plastic, piece	-0.229690797	NZ	Sat Oct 03 2020	Oct	2020	Oct-2020	plastic	piece
8876411	plastic, piece	-0.229690824	NZ	Sat Oct 03 2020	Oct	2020	Oct-2020	plastic	piece
8876410	plastic, piece	-0.229690807	NZ	Sat Oct 03 2020	Oct	2020	Oct-2020	plastic
8876408	plastic	-0.229691019	NZ	Sat Oct 03 2020	Oct	2020	Oct-2020	plastic	piece
8876395	plastic, piece	-0.229690773	NZ	Sat Oct 03 2020	Oct	2020	Oct-2020	plastic	piece
8876393	plastic, piece	-0.229687066	NZ	Sat Oct 03 2020	Oct	2020	Oct-2020	plastic	piece
8876392	plastic, piece	-0.229690802	NZ	Sat Oct 03 2020	Oct	2020	Oct-2020	plastic	piece
8876390	plastic, piece	-0.229690917	NZ	Sat Oct 03 2020	Oct	2020	Oct-2020	plastic	straw
8876389	plastic, straw	-0.229690885	NZ	Sat Oct 03 2020	Oct	2020	Oct-2020	plastic	piece
8876388	plastic, piece	-0.229687053	NZ	Sat Oct 03 2020	Oct	2020	Oct-2020	plastic	piece
8876387	plastic, piece	-0.229690716	NZ	Sat Oct 03 2020	Oct	2020	Oct-2020	plastic	piece
8876386	plastic, piece	-0.22968708	NZ	Sat Oct 03 2020	Oct	2020	Oct-2020	plastic	piece
8876385	plastic, piece	-0.229687068	NZ	Sat Oct 03 2020	Oct	2020	Oct-2020	plastic	piece
8876384	plastic, piece	-0.229687073	NZ	Sat Oct 03 2020	Oct	2020	Oct-2020	polystyrene	plastic
8876383	polystyrene, plastic	-0.229687068	NZ	Sat Oct 03 2020	Oct	2020	Oct-2020	polystyrene	plastic
8876381	polystyrene, plastic	-0.22968707	NZ	Sat Oct 03 2020	Oct	2020	Oct-2020	plastic	piece
8876380	plastic, piece	-0.229690809	NZ	Sat Oct 03 2020	Oct	2020	Oct-2020	plastic	piece
8876376	plastic, piece	-0.229687064	NZ	Sat Oct 03 2020	Oct	2020	Oct-2020	plastic	piece
8876364	plastic, piece	-0.229687073	NZ	Sat Oct 03 2020	Oct	2020	Oct-2020	plastic	piece
8876348	plastic, piece	-0.229687164	NZ	Sat Oct 03 2020	Oct	2020	Oct-2020	plastic	piece
8876347	plastic, piece	-0.229687083	NZ	Sat Oct 03 2020	Oct	2020	Oct-2020	plastic	piece
8876346	plastic, piece	-0.229687073	NZ	Sat Oct 03 2020	Oct	2020	Oct-2020	plastic	clingwrap
8876345	plastic, clingwrap	-0.229687164	NZ	Sat Oct 03 2020	Oct	2020	Oct-2020	plastic	clingwrap
8876344	plastic, clingwrap	-0.22968711	NZ	Sat Oct 03 2020	Oct	2020	Oct-2020	plastic	piece
8876343	plastic, piece	-0.229687132	NZ	Sat Oct 03 2020	Oct	2020	Oct-2020	plastic	piece
8876342	plastic, piece	-0.229687069	NZ	Sat Oct 03 2020	Oct	2020	Oct-2020	plastic	piece
8876341	plastic, piece	-0.229686917	NZ	Sat Oct 03 2020	Oct	2020	Oct-2020	plastic	piece
8876340	plastic, piece	-0.229686706	NZ	Sat Oct 03 2020	Oct	2020	Oct-2020	plastic	piece
8876339	plastic, piece	-0.229684466	NZ	Sat Oct 03 2020	Oct	2020	Oct-2020	polystyrene	plastic
8876338	polystyrene, plastic	-0.229687076	NZ	Sat Oct 03 2020	Oct	2020	Oct-2020	plastic	piece
8876336	plastic, piece	-0.229687144	NZ	Sat Oct 03 2020	Oct	2020	Oct-2020	plastic	piece
8876335	plastic, piece	-0.22968711	NZ	Sat Oct 03 2020	Oct	2020	Oct-2020	plastic	piece
8876333	plastic, piece	-0.229687033	NZ	Sat Oct 03 2020	Oct	2020	Oct-2020	polystyrene	plastic
8876328	polystyrene, plastic	-0.229687093	NZ	Sat Oct 03 2020	Oct	2020	Oct-2020	plastic	piece
8876318	plastic, piece	-0.229679194	NZ	Sat Oct 03 2020	Oct	2020	Oct-2020	plastic	piece
8876317	plastic, piece	-0.229679092	NZ	Sat Oct 03 2020	Oct	2020	Oct-2020	plastic	piece
8876316	plastic, piece	-0.229682816	NZ	Sat Oct 03 2020	Oct	2020	Oct-2020	plastic	piece
8876315	plastic, piece	-0.229683433	NZ	Sat Oct 03 2020	Oct	2020	Oct-2020	plastic	piece
8876314	plastic, piece	-0.229682655	NZ	Sat Oct 03 2020	Oct	2020	Oct-2020	plastic	piece
8876313	plastic, piece	-0.229679384	NZ	Sat Oct 03 2020	Oct	2020	Oct-2020	plastic	clingwrap
8876312	plastic, clingwrap	-0.229679068	NZ	Sat Oct 03 2020	Oct	2020	Oct-2020	plastic	piece
8876311	plastic, piece	-0.229676822	NZ	Sat Oct 03 2020	Oct	2020	Oct-2020	plastic	piece
8876310	plastic, piece	-0.229676823	NZ	Sat Oct 03 2020	Oct	2020	Oct-2020	plastic	piece
8876309	plastic, piece	-0.229674106	NZ	Sat Oct 03 2020	Oct	2020	Oct-2020	polystyrene	plastic
8876308	polystyrene, plastic	-0.229675508	NZ	Sat Oct 03 2020	Oct	2020	Oct-2020	plastic	piece
8876307	plastic, piece	-0.229675313	NZ	Sat Oct 03 2020	Oct	2020	Oct-2020	polystyrene	plastic
8876306	polystyrene, plastic	-0.22967426	NZ	Sat Oct 03 2020	Oct	2020	Oct-2020	plastic	piece
8876305	plastic, piece	-0.229676829	NZ	Sat Oct 03 2020	Oct	2020	Oct-2020	plastic	piece
8876304	plastic, piece	-0.229682641	NZ	Sat Oct 03 2020	Oct	2020	Oct-2020	plastic	piece
8876303	plastic, piece	-0.229673907	NZ	Sat Oct 03 2020	Oct	2020	Oct-2020	plastic	piece
8876302	plastic, piece	-0.229672664	NZ	Sat Oct 03 2020	Oct	2020	Oct-2020	plastic	piece
8876301	plastic, piece	-0.229672231	NZ	Sat Oct 03 2020	Oct	2020	Oct-2020	plastic	piece
8876300	plastic, piece	-0.229674063	NZ	Sat Oct 03 2020	Oct	2020	Oct-2020	plastic	piece
8876299	plastic, piece	-0.229672389	NZ	Sat Oct 03 2020	Oct	2020	Oct-2020	plastic	piece
8876298	plastic, piece	-0.229672186	NZ	Sat Oct 03 2020	Oct	2020	Oct-2020	polystyrene
8876297	polystyrene	-0.229669247	NZ	Sat Oct 03 2020	Oct	2020	Oct-2020	plastic	clingwrap
8876296	plastic, clingwrap	-0.229669409	NZ	Sat Oct 03 2020	Oct	2020	Oct-2020	plastic	wrapper
8876295	plastic, wrapper	-0.229669409	NZ	Sat Oct 03 2020	Oct	2020	Oct-2020	plastic	piece
8876294	plastic, piece	-0.229669273	NZ	Sat Oct 03 2020	Oct	2020	Oct-2020	plastic	wrapper
8876293	plastic, wrapper	-0.229669563	NZ	Sat Oct 03 2020	Oct	2020	Oct-2020	balloon
8876292	balloon	-0.229669573	NZ	Sat Oct 03 2020	Oct	2020	Oct-2020	plastic	mcdonalds	cup	plasticlid
8876291	plastic, mcdonalds, cup, plasticlid	-0.229669188	NZ	Sat Oct 03 2020	Oct	2020	Oct-2020	plastic	packingmaterial
8876290	plastic, packingmaterial	-0.229669295	NZ	Sat Oct 03 2020	Oct	2020	Oct-2020	plastic
8876289	plastic	-0.229669295	NZ	Sat Oct 03 2020	Oct	2020	Oct-2020	plastic	wrapper
8876236	plastic, wrapper	-0.229671523	NZ	Sat Oct 03 2020	Oct	2020	Oct-2020	candy	plastic	wrapper
8876235	candy, plastic, wrapper	-0.229671393	NZ	Sat Oct 03 2020	Oct	2020	Oct-2020	plastic
8876234	plastic	-0.229673299	NZ	Sat Oct 03 2020	Oct	2020	Oct-2020	plastic	mcdonalds	cup	plasticlid
8876233	plastic, mcdonalds, cup, plasticlid	-0.229669627	NZ	Sat Oct 03 2020	Oct	2020	Oct-2020	plastic	clingwrap
8876232	plastic, clingwrap	-0.22966956	NZ	Sat Oct 03 2020	Oct	2020	Oct-2020	plastic
8876231	plastic	-0.229681317	NZ	Sat Oct 03 2020	Oct	2020	Oct-2020	piece	plastic
8876230	piece, plastic	-0.229674261	NZ	Sat Oct 03 2020	Oct	2020	Oct-2020	plastic	mcdonalds	cup	plasticlid
8876229	plastic, mcdonalds, cup, plasticlid	-0.229684483	NZ	Sat Oct 03 2020	Oct	2020	Oct-2020	polystyrene	plastic
8876228	polystyrene, plastic	-0.229673237	NZ	Sat Oct 03 2020	Oct	2020	Oct-2020	plastic
8876227	plastic	-0.229673207	NZ	Sat Oct 03 2020	Oct	2020	Oct-2020	bottle	glass
8876226	bottle, glass	-0.229679486	NZ	Sat Oct 03 2020	Oct	2020	Oct-2020	plastic
8876225	plastic	-0.229678391	NZ	Sat Oct 03 2020	Oct	2020	Oct-2020	plastic	wrapper
8876224	plastic, wrapper	-0.229673293	NZ	Sat Oct 03 2020	Oct	2020	Oct-2020	wrapper	plastic
8876223	wrapper, plastic	-0.229682614	NZ	Sat Oct 03 2020	Oct	2020	Oct-2020	plastic
8876222	plastic	-0.229679486	NZ	Sat Oct 03 2020	Oct	2020	Oct-2020	plastic	piece
8876214	plastic, piece	-0.2296859	NZ	Sat Oct 03 2020	Oct	2020	Oct-2020	plastic	foam
8876213	plastic, foam	-0.22912797	NZ	Fri Oct 02 2020	Oct	2020	Oct-2020	plastic	mcdonalds	cup	plasticlid
8876212	plastic, mcdonalds, cup, plasticlid	-0.22968447	NZ	Sat Oct 03 2020	Oct	2020	Oct-2020	plastic	piece
8876211	plastic, piece	-0.229688732	NZ	Sat Oct 03 2020	Oct	2020	Oct-2020	plastic	straw
8876210	plastic, straw	-0.22968447	NZ	Sat Oct 03 2020	Oct	2020	Oct-2020	plastic	clingwrap
8876209	plastic, clingwrap	-0.229689181	NZ	Sat Oct 03 2020	Oct	2020	Oct-2020	plastic
8876208	plastic	-0.229689904	NZ	Sat Oct 03 2020	Oct	2020	Oct-2020	fabric
8876207	fabric	-0.229689922	NZ	Sat Oct 03 2020	Oct	2020	Oct-2020	plastic	bottlecap
8876206	plastic, bottlecap	-0.229694219	NZ	Sat Oct 03 2020	Oct	2020	Oct-2020	can	aluminum
8876204	can, aluminum	-0.229700879	NZ	Sat Oct 03 2020	Oct	2020	Oct-2020	plastic	wrapper
8876203	plastic, wrapper	-0.229689869	NZ	Sat Oct 03 2020	Oct	2020	Oct-2020	piece	plastic
8876201	piece, plastic	-0.229689908	NZ	Sat Oct 03 2020	Oct	2020	Oct-2020	bottle	plastic
8876200	bottle, plastic	-0.229697482	NZ	Sat Oct 03 2020	Oct	2020	Oct-2020	plastic	cigarette	wrapper
8767592	plastic, cigarette, wrapper	-0.215582342	NZ	Fri Oct 02 2020	Oct	2020	Oct-2020	plastic	plasticbag	tissue	bag
8761584	plastic, plasticbag, tissue, bag	-0.215578217	NZ	Fri Oct 02 2020	Oct	2020	Oct-2020	paper	tissue
8754583	paper, tissue	-0.229899553	NZ	Fri Oct 02 2020	Oct	2020	Oct-2020	cardboard	vape
8754582	cardboard, vape	-0.229899987	NZ	Fri Oct 02 2020	Oct	2020	Oct-2020	paper	tissue
8754581	paper, tissue	-0.229899567	NZ	Fri Oct 02 2020	Oct	2020	Oct-2020	piece	plastic
8754580	piece, plastic	-0.22989958	NZ	Fri Oct 02 2020	Oct	2020	Oct-2020	paper
8754579	paper	-0.229899694	NZ	Fri Oct 02 2020	Oct	2020	Oct-2020	milkshake	cup	thegreatkiwishake
8754578	milkshake, cup, thegreatkiwishake	-0.229900008	NZ	Fri Oct 02 2020	Oct	2020	Oct-2020	milkshake	forgoodnessshakes
8754577	milkshake, forgoodnessshakes	-0.22990004	NZ	Fri Oct 02 2020	Oct	2020	Oct-2020	paper	junkmail
8754576	paper, junkmail	-0.229900003	NZ	Fri Oct 02 2020	Oct	2020	Oct-2020	bottlecap	longwhitevodka
8754575	bottlecap, longwhitevodka	-0.229899928	NZ	Fri Oct 02 2020	Oct	2020	Oct-2020	cup	kfc	plasticstraw
8754574	cup, kfc, plasticstraw	-0.229900842	NZ	Fri Oct 02 2020	Oct	2020	Oct-2020	plastic	butt	cigarette
8754573	plastic, butt, cigarette	-0.229882445	NZ	Fri Oct 02 2020	Oct	2020	Oct-2020	piece	plastic	wrapper
8754572	piece, plastic, wrapper	-0.229899926	NZ	Fri Oct 02 2020	Oct	2020	Oct-2020	plastic	cigarette	butt
8754571	plastic, cigarette, butt	-0.229882424	NZ	Fri Oct 02 2020	Oct	2020	Oct-2020	plastic
8754570	plastic	-0.229882351	NZ	Fri Oct 02 2020	Oct	2020	Oct-2020	alcohol	can	metal	woodstock
8754569	alcohol, can, metal, woodstock	-0.229882585	NZ	Fri Oct 02 2020	Oct	2020	Oct-2020	plastic	bag
8754568	plastic, bag	-0.229882457	NZ	Fri Oct 02 2020	Oct	2020	Oct-2020	plastic	butt	cigarette
8754567	plastic, butt, cigarette	-0.22988245	NZ	Fri Oct 02 2020	Oct	2020	Oct-2020	cardboard
8754566	cardboard	-0.229882363	NZ	Fri Oct 02 2020	Oct	2020	Oct-2020	piece	plastic	butt	cigarette
8754565	piece, plastic, butt, cigarette	-0.22988245	NZ	Fri Oct 02 2020	Oct	2020	Oct-2020	bag	chips	plastic	wrapper	bluebird
8754564	bag, chips, plastic, wrapper, bluebird	-0.229882395	NZ	Fri Oct 02 2020	Oct	2020	Oct-2020	plastic	butt	cigarette
8754563	plastic, butt, cigarette	-0.229882408	NZ	Fri Oct 02 2020	Oct	2020	Oct-2020	cigarette	plastic	butt
8754561	cigarette, plastic, butt	-0.229882189	NZ	Fri Oct 02 2020	Oct	2020	Oct-2020	bottlecap	longwhitevodka
8754559	bottlecap, longwhitevodka	-0.229882241	NZ	Fri Oct 02 2020	Oct	2020	Oct-2020	plastic	string
8754558	plastic, string	-0.229881907	NZ	Fri Oct 02 2020	Oct	2020	Oct-2020	cigarette	butt	plastic
8754556	cigarette, butt, plastic	-0.229882103	NZ	Fri Oct 02 2020	Oct	2020	Oct-2020	plastic	lollipopstick
8753106	plastic, lollipopstick	-0.236251905	NZ	Fri Oct 02 2020	Oct	2020	Oct-2020	plastic
8753105	plastic	-0.236240964	NZ	Fri Oct 02 2020	Oct	2020	Oct-2020	bottle	aluminum
8753104	bottle, aluminum	-0.236254106	NZ	Fri Oct 02 2020	Oct	2020	Oct-2020	plastic
8753102	plastic	-0.23623528	NZ	Fri Oct 02 2020	Oct	2020	Oct-2020	plastic	bottle	lucaspawpaw
8753101	plastic, bottle, lucaspawpaw	-0.236238035	NZ	Fri Oct 02 2020	Oct	2020	Oct-2020	bottlecap	plastic
8753100	bottlecap, plastic	-0.236238956	NZ	Fri Oct 02 2020	Oct	2020	Oct-2020	plastic	straw
8753099	plastic, straw	-0.236234115	NZ	Fri Oct 02 2020	Oct	2020	Oct-2020	cigarettebutt	celluloseacetate
8753098	cigarettebutt, celluloseacetate	-0.236236118	NZ	Fri Oct 02 2020	Oct	2020	Oct-2020	metal	streetsweepermetal
8753097	metal, streetsweepermetal	-0.236236762	NZ	Fri Oct 02 2020	Oct	2020	Oct-2020	aluminum	can	cocacola
8753096	aluminum, can, cocacola	-0.23623141	NZ	Fri Oct 02 2020	Oct	2020	Oct-2020	cigarettebutt	celluloseacetate
8753095	cigarettebutt, celluloseacetate	-0.236236185	NZ	Fri Oct 02 2020	Oct	2020	Oct-2020	metal	streetsweepermetal
8753094	metal, streetsweepermetal	-0.236232171	NZ	Fri Oct 02 2020	Oct	2020	Oct-2020	plastic
8753093	plastic	-0.236226503	NZ	Fri Oct 02 2020	Oct	2020	Oct-2020	metal	streetsweepermetal
8753092	metal, streetsweepermetal	-0.236232206	NZ	Fri Oct 02 2020	Oct	2020	Oct-2020	cigarettebutt
8753091	cigarettebutt	-0.236237554	NZ	Fri Oct 02 2020	Oct	2020	Oct-2020	metal	streetsweepermetal
8753090	metal, streetsweepermetal	-0.236237383	NZ	Fri Oct 02 2020	Oct	2020	Oct-2020	celluloseacetate	cigarettebutt
8753089	celluloseacetate, cigarettebutt	-0.23623453	NZ	Fri Oct 02 2020	Oct	2020	Oct-2020	plastic	ziptie
8753088	plastic, ziptie	-0.236235105	NZ	Fri Oct 02 2020	Oct	2020	Oct-2020	aluminum	can
8748506	aluminum, can	-0.229702874	NZ	Fri Oct 02 2020	Oct	2020	Oct-2020	cardboard
8748503	cardboard	-0.22970409	NZ	Fri Oct 02 2020	Oct	2020	Oct-2020	plastic	clingwrap
8748490	plastic, clingwrap	-0.229668569	NZ	Fri Oct 02 2020	Oct	2020	Oct-2020	bottlecap	metal
8748489	bottlecap, metal	-0.229697973	NZ	Fri Oct 02 2020	Oct	2020	Oct-2020	plastic
8748488	plastic	-0.229698168	NZ	Fri Oct 02 2020	Oct	2020	Oct-2020	plastic	lid
8748487	plastic, lid	-0.22971162	NZ	Fri Oct 02 2020	Oct	2020	Oct-2020	butt	cigarette	plastic
8748485	butt, cigarette, plastic	-0.229698051	NZ	Fri Oct 02 2020	Oct	2020	Oct-2020	cup	plastic	paper
8748482	cup, plastic, paper	-0.229680783	NZ	Fri Oct 02 2020	Oct	2020	Oct-2020	plastic
8748480	plastic	-0.229697431	NZ	Fri Oct 02 2020	Oct	2020	Oct-2020	plastic	wrapper
8748479	plastic, wrapper	-0.229697431	NZ	Fri Oct 02 2020	Oct	2020	Oct-2020	plastic	milk	top
8748478	plastic, milk, top	-0.229709503	NZ	Fri Oct 02 2020	Oct	2020	Oct-2020	plastic
8748476	plastic	-0.229696304	NZ	Fri Oct 02 2020	Oct	2020	Oct-2020	plastic
8748475	plastic	-0.229698052	NZ	Fri Oct 02 2020	Oct	2020	Oct-2020	plastic
8748474	plastic	-0.229669637	NZ	Fri Oct 02 2020	Oct	2020	Oct-2020	bottlecap	metal
8748471	bottlecap, metal	-0.229698168	NZ	Fri Oct 02 2020	Oct	2020	Oct-2020	plastic	wrapper
8748470	plastic, wrapper	-0.229704222	NZ	Fri Oct 02 2020	Oct	2020	Oct-2020	paper	mcdonalds	wrapper
8748469	paper, mcdonalds, wrapper	-0.229676733	NZ	Fri Oct 02 2020	Oct	2020	Oct-2020	hat	fabric
8672916	hat, fabric	-0.229811397	NZ	Mon Sep 28 2020	Sep	2020	Sep-2020	butt	celluloseacetate	cigarette	microfibre	plastic
8672915	butt, celluloseacetate, cigarette, microfibre, plastic	-0.229813347	NZ	Mon Sep 28 2020	Sep	2020	Sep-2020	cigarette	butt	plastic
8672914	cigarette, butt, plastic	-0.229811316	NZ	Mon Sep 28 2020	Sep	2020	Sep-2020	butt	celluloseacetate	cigarette	plastic
8672913	butt, celluloseacetate, cigarette, plastic	-0.229909151	NZ	Mon Sep 28 2020	Sep	2020	Sep-2020	metal	blade
8664849	metal, blade	-0.23627346	NZ	Fri Oct 02 2020	Oct	2020	Oct-2020	lid	plastic
8664848	lid, plastic	-0.236277118	NZ	Fri Oct 02 2020	Oct	2020	Oct-2020	plastic
8664847	plastic	-0.236278851	NZ	Fri Oct 02 2020	Oct	2020	Oct-2020	cardboard	toiletpapertube
8664846	cardboard, toiletpapertube	-0.236299601	NZ	Thu Oct 01 2020	Oct	2020	Oct-2020	cigarettebutt	celluloseacetate
8664845	cigarettebutt, celluloseacetate	-0.236287454	NZ	Thu Oct 01 2020	Oct	2020	Oct-2020	candy	wrapper	paper
8664844	candy, wrapper, paper	-0.236316297	NZ	Thu Oct 01 2020	Oct	2020	Oct-2020	plastic	cup
8664843	plastic, cup	-0.236298816	NZ	Thu Oct 01 2020	Oct	2020	Oct-2020	rubber	rubberband
8664842	rubber, rubberband	-0.23627386	NZ	Thu Oct 01 2020	Oct	2020	Oct-2020	paper	facemask	ppe
8664841	paper, facemask, ppe	-0.236280696	NZ	Thu Oct 01 2020	Oct	2020	Oct-2020	plastic	fruitlabel
8664840	plastic, fruitlabel	-0.236269726	NZ	Thu Oct 01 2020	Oct	2020	Oct-2020	cigarettebutt	celluloseacetate
8664839	cigarettebutt, celluloseacetate	-0.236290152	NZ	Thu Oct 01 2020	Oct	2020	Oct-2020	bottlecap	plastic
8664838	bottlecap, plastic	-0.236302935	NZ	Thu Oct 01 2020	Oct	2020	Oct-2020	lid	plastic
8664837	lid, plastic	-0.236304313	NZ	Thu Oct 01 2020	Oct	2020	Oct-2020	aluminum	teartab	lid
8664836	aluminum, teartab, lid	-0.236297344	NZ	Thu Oct 01 2020	Oct	2020	Oct-2020	plastic
8664835	plastic	-0.236280489	NZ	Thu Oct 01 2020	Oct	2020	Oct-2020	plastic	cup
8664834	plastic, cup	-0.236298733	NZ	Thu Oct 01 2020	Oct	2020	Oct-2020	lid	plastic
8664833	lid, plastic	-0.23630968	NZ	Fri Oct 02 2020	Oct	2020	Oct-2020	metal	bottle
8664832	metal, bottle	-0.23628908	NZ	Thu Oct 01 2020	Oct	2020	Oct-2020	plastic
8643156	plastic	-0.229704275	NZ	Thu Oct 01 2020	Oct	2020	Oct-2020	bottlecap	metal
8643155	bottlecap, metal	-0.229704275	NZ	Thu Oct 01 2020	Oct	2020	Oct-2020	bottlecap	metal
8643154	bottlecap, metal	-0.229704275	NZ	Thu Oct 01 2020	Oct	2020	Oct-2020	plastic	wrapper
8643153	plastic, wrapper	-0.229704464	NZ	Thu Oct 01 2020	Oct	2020	Oct-2020	piece	plastic
8643152	piece, plastic	-0.229704459	NZ	Thu Oct 01 2020	Oct	2020	Oct-2020	polystyrene
8643151	polystyrene	-0.22970426	NZ	Thu Oct 01 2020	Oct	2020	Oct-2020	piece	plastic
8643150	piece, plastic	-0.229714887	NZ	Thu Oct 01 2020	Oct	2020	Oct-2020	plastic
8643149	plastic	-0.229704974	NZ	Thu Oct 01 2020	Oct	2020	Oct-2020	cardboard
8643148	cardboard	-0.229711913	NZ	Thu Oct 01 2020	Oct	2020	Oct-2020	plastic	piece
8643147	plastic, piece	-0.229704117	NZ	Thu Oct 01 2020	Oct	2020	Oct-2020	polystyrene
8643146	polystyrene	-0.229713818	NZ	Thu Oct 01 2020	Oct	2020	Oct-2020	plastic	straw
8643145	plastic, straw	-0.229676588	NZ	Thu Oct 01 2020	Oct	2020	Oct-2020	plastic
8643144	plastic	-0.229676209	NZ	Thu Oct 01 2020	Oct	2020	Oct-2020	piece	plastic
8643143	piece, plastic	-0.229676645	NZ	Thu Oct 01 2020	Oct	2020	Oct-2020	plastic	cigarettebutt
8643142	plastic, cigarettebutt	-0.22967659	NZ	Thu Oct 01 2020	Oct	2020	Oct-2020	plastic	straw
8643141	plastic, straw	-0.229676588	NZ	Thu Oct 01 2020	Oct	2020	Oct-2020	aluminum	can
8643140	aluminum, can	-0.229676653	NZ	Thu Oct 01 2020	Oct	2020	Oct-2020	plastic
8643139	plastic	-0.229676645	NZ	Thu Oct 01 2020	Oct	2020	Oct-2020	piece	plastic
8643138	piece, plastic	-0.229676655	NZ	Thu Oct 01 2020	Oct	2020	Oct-2020	piece	plastic
8643137	piece, plastic	-0.229676662	NZ	Thu Oct 01 2020	Oct	2020	Oct-2020	piece	plastic
8643136	piece, plastic	-0.229676662	NZ	Thu Oct 01 2020	Oct	2020	Oct-2020	plastic
8643135	plastic	-0.229676858	NZ	Thu Oct 01 2020	Oct	2020	Oct-2020	wrapper	metal
8643134	wrapper, metal	-0.229676769	NZ	Thu Oct 01 2020	Oct	2020	Oct-2020	plastic	piece
8643133	plastic, piece	-0.229687821	NZ	Thu Oct 01 2020	Oct	2020	Oct-2020	piece	plastic
8643132	piece, plastic	-0.229676655	NZ	Thu Oct 01 2020	Oct	2020	Oct-2020	plastic
8643131	plastic	-0.229677071	NZ	Thu Oct 01 2020	Oct	2020	Oct-2020	piece	plastic
8643130	piece, plastic	-0.229676657	NZ	Thu Oct 01 2020	Oct	2020	Oct-2020	plastic
8643129	plastic	-0.229676858	NZ	Thu Oct 01 2020	Oct	2020	Oct-2020	plastic
8643128	plastic	-0.229677015	NZ	Thu Oct 01 2020	Oct	2020	Oct-2020	piece	plastic
8643127	piece, plastic	-0.229677046	NZ	Thu Oct 01 2020	Oct	2020	Oct-2020	plastic	bottlecap
8643126	plastic, bottlecap	-0.22967697	NZ	Thu Oct 01 2020	Oct	2020	Oct-2020	piece	plastic
8643125	piece, plastic	-0.229676654	NZ	Thu Oct 01 2020	Oct	2020	Oct-2020	plastic	bottlecap
8643124	plastic, bottlecap	-0.229677124	NZ	Thu Oct 01 2020	Oct	2020	Oct-2020	bottlecap	metal
8588207	bottlecap, metal	-0.236260026	NZ	Wed Sep 30 2020	Sep	2020	Sep-2020	bottlecap	plastic
8588206	bottlecap, plastic	-0.236256565	NZ	Wed Sep 30 2020	Sep	2020	Sep-2020	hairtie
8588205	hairtie	-0.23626055	NZ	Wed Sep 30 2020	Sep	2020	Sep-2020	building	material
8581774	building, material	-0.236283824	NZ	Thu Oct 01 2020	Oct	2020	Oct-2020	building	material
8581773	building, material	-0.236284455	NZ	Thu Oct 01 2020	Oct	2020	Oct-2020	paper
8581667	paper	-0.236243418	NZ	Wed Sep 30 2020	Sep	2020	Sep-2020	beer	bottles
8581666	beer, bottles	-0.236243314	NZ	Wed Sep 30 2020	Sep	2020	Sep-2020	plastic	piece
8570088	plastic, piece	-0.235070807	NZ	Wed Sep 30 2020	Sep	2020	Sep-2020	plastic	piece
8570075	plastic, piece	-0.235068546	NZ	Wed Sep 30 2020	Sep	2020	Sep-2020	plastic	piece
8570074	plastic, piece	-0.235069744	NZ	Wed Sep 30 2020	Sep	2020	Sep-2020	plastic	piece
8570073	plastic, piece	-0.235069384	NZ	Wed Sep 30 2020	Sep	2020	Sep-2020	plastic	piece
8570072	plastic, piece	-0.235069355	NZ	Wed Sep 30 2020	Sep	2020	Sep-2020	plastic	piece
8570071	plastic, piece	-0.235068546	NZ	Wed Sep 30 2020	Sep	2020	Sep-2020	plastic	piece
8570070	plastic, piece	-0.235069381	NZ	Wed Sep 30 2020	Sep	2020	Sep-2020	plastic	piece
8570069	plastic, piece	-0.235069835	NZ	Wed Sep 30 2020	Sep	2020	Sep-2020	plastic	piece
8570068	plastic, piece	-0.235069632	NZ	Wed Sep 30 2020	Sep	2020	Sep-2020	plastic	piece
8570067	plastic, piece	-0.235069548	NZ	Wed Sep 30 2020	Sep	2020	Sep-2020	plastic	piece
8570066	plastic, piece	-0.235069455	NZ	Wed Sep 30 2020	Sep	2020	Sep-2020	plastic	piece
8570065	plastic, piece	-0.235068546	NZ	Wed Sep 30 2020	Sep	2020	Sep-2020	plastic	piece
8570063	plastic, piece	-0.235070755	NZ	Wed Sep 30 2020	Sep	2020	Sep-2020	plastic	piece
8570062	plastic, piece	-0.235068546	NZ	Wed Sep 30 2020	Sep	2020	Sep-2020	plastic	piece
8570061	plastic, piece	-0.235069424	NZ	Wed Sep 30 2020	Sep	2020	Sep-2020	plastic	piece
8570060	plastic, piece	-0.235069424	NZ	Wed Sep 30 2020	Sep	2020	Sep-2020	plastic	piece
8570047	plastic, piece	-0.23506838	NZ	Wed Sep 30 2020	Sep	2020	Sep-2020	plastic	piece
8570046	plastic, piece	-0.235068281	NZ	Wed Sep 30 2020	Sep	2020	Sep-2020	plastic	piece
8570045	plastic, piece	-0.235067343	NZ	Wed Sep 30 2020	Sep	2020	Sep-2020	plastic	piece
8570044	plastic, piece	-0.235068433	NZ	Wed Sep 30 2020	Sep	2020	Sep-2020	plastic	piece
8570043	plastic, piece	-0.235067343	NZ	Wed Sep 30 2020	Sep	2020	Sep-2020	plastic	piece
8570041	plastic, piece	-0.235068436	NZ	Wed Sep 30 2020	Sep	2020	Sep-2020	plastic	straw
8570040	plastic, straw	-0.235068306	NZ	Wed Sep 30 2020	Sep	2020	Sep-2020	plastic	piece
8570038	plastic, piece	-0.235067506	NZ	Wed Sep 30 2020	Sep	2020	Sep-2020	plastic	piece
8570036	plastic, piece	-0.235068433	NZ	Wed Sep 30 2020	Sep	2020	Sep-2020	plastic	piece
8570035	plastic, piece	-0.235068439	NZ	Wed Sep 30 2020	Sep	2020	Sep-2020	piece	plastic
8570033	piece, plastic	-0.235067068	NZ	Wed Sep 30 2020	Sep	2020	Sep-2020	plastic	piece
8570032	plastic, piece	-0.235067417	NZ	Wed Sep 30 2020	Sep	2020	Sep-2020	plastic	piece
8570031	plastic, piece	-0.235067166	NZ	Wed Sep 30 2020	Sep	2020	Sep-2020	plastic	piece
8570030	plastic, piece	-0.235067371	NZ	Wed Sep 30 2020	Sep	2020	Sep-2020	bottlecap	plastic	lid
8570028	bottlecap, plastic, lid	-0.235067466	NZ	Wed Sep 30 2020	Sep	2020	Sep-2020	bottlecap	plastic	lid
8570026	bottlecap, plastic, lid	-0.235066989	NZ	Wed Sep 30 2020	Sep	2020	Sep-2020	plastic	piece
8570025	plastic, piece	-0.235066865	NZ	Wed Sep 30 2020	Sep	2020	Sep-2020	piece	plastic
8570024	piece, plastic	-0.235066865	NZ	Wed Sep 30 2020	Sep	2020	Sep-2020	piece	plastic
8570023	piece, plastic	-0.235064862	NZ	Wed Sep 30 2020	Sep	2020	Sep-2020	plastic	piece
8570022	plastic, piece	-0.23506668	NZ	Wed Sep 30 2020	Sep	2020	Sep-2020	plastic	piece
8570020	plastic, piece	-0.235066406	NZ	Wed Sep 30 2020	Sep	2020	Sep-2020	plastic	piece
8570018	plastic, piece	-0.23506661	NZ	Wed Sep 30 2020	Sep	2020	Sep-2020	plastic	lid	bottlecap
8570016	plastic, lid, bottlecap	-0.235065925	NZ	Wed Sep 30 2020	Sep	2020	Sep-2020	plastic	lid	bottlecap
8570013	plastic, lid, bottlecap	-0.235066183	NZ	Wed Sep 30 2020	Sep	2020	Sep-2020	plastic	piece
8570012	plastic, piece	-0.235066291	NZ	Wed Sep 30 2020	Sep	2020	Sep-2020	plastic	piece
8570011	plastic, piece	-0.235066106	NZ	Wed Sep 30 2020	Sep	2020	Sep-2020	piece	plastic
8570010	piece, plastic	-0.235065504	NZ	Wed Sep 30 2020	Sep	2020	Sep-2020	piece	plastic
8570005	piece, plastic	-0.235066593	NZ	Wed Sep 30 2020	Sep	2020	Sep-2020	piece	plastic
8570003	piece, plastic	-0.235064886	NZ	Wed Sep 30 2020	Sep	2020	Sep-2020	piece	plastic
8570000	piece, plastic	-0.235064783	NZ	Wed Sep 30 2020	Sep	2020	Sep-2020	piece	plastic
8569998	piece, plastic	-0.235064869	NZ	Wed Sep 30 2020	Sep	2020	Sep-2020	piece	plastic
8569997	piece, plastic	-0.235064909	NZ	Wed Sep 30 2020	Sep	2020	Sep-2020	plastic	straw
8569996	plastic, straw	-0.235064869	NZ	Wed Sep 30 2020	Sep	2020	Sep-2020	piece	plastic
8569994	piece, plastic	-0.235064868	NZ	Wed Sep 30 2020	Sep	2020	Sep-2020	piece	plastic
8569993	piece, plastic	-0.235064883	NZ	Wed Sep 30 2020	Sep	2020	Sep-2020	piece	plastic
8569992	piece, plastic	-0.235064869	NZ	Wed Sep 30 2020	Sep	2020	Sep-2020	piece	plastic
8569990	piece, plastic	-0.23506482	NZ	Wed Sep 30 2020	Sep	2020	Sep-2020	piece	plastic
8569987	piece, plastic	-0.235064869	NZ	Wed Sep 30 2020	Sep	2020	Sep-2020	plastic	lid	bottlecap
8569986	plastic, lid, bottlecap	-0.235064868	NZ	Wed Sep 30 2020	Sep	2020	Sep-2020	piece	plastic
8569984	piece, plastic	-0.235064913	NZ	Wed Sep 30 2020	Sep	2020	Sep-2020	piece	plastic
8569983	piece, plastic	-0.235064913	NZ	Wed Sep 30 2020	Sep	2020	Sep-2020	plastic	straw
8569982	plastic, straw	-0.235064913	NZ	Wed Sep 30 2020	Sep	2020	Sep-2020	piece	plastic
8569981	piece, plastic	-0.235064913	NZ	Wed Sep 30 2020	Sep	2020	Sep-2020	piece	plastic
8569980	piece, plastic	-0.235064913	NZ	Wed Sep 30 2020	Sep	2020	Sep-2020	plastic	lid	bottlecap
8569976	plastic, lid, bottlecap	-0.235064504	NZ	Wed Sep 30 2020	Sep	2020	Sep-2020	plastic	lid	bottlecap
8569974	plastic, lid, bottlecap	-0.235064898	NZ	Wed Sep 30 2020	Sep	2020	Sep-2020	plastic	piece
8569973	plastic, piece	-0.235064239	NZ	Wed Sep 30 2020	Sep	2020	Sep-2020	plastic	piece
8569972	plastic, piece	-0.235064844	NZ	Wed Sep 30 2020	Sep	2020	Sep-2020	piece	plastic
8569971	piece, plastic	-0.235064933	NZ	Wed Sep 30 2020	Sep	2020	Sep-2020	plastic	lid	bottlecap
8569969	plastic, lid, bottlecap	-0.235064754	NZ	Wed Sep 30 2020	Sep	2020	Sep-2020	plastic	piece
8569968	plastic, piece	-0.235064256	NZ	Wed Sep 30 2020	Sep	2020	Sep-2020	piece	plastic
8569967	piece, plastic	-0.235064913	NZ	Wed Sep 30 2020	Sep	2020	Sep-2020	bottlecap	plastic	lid
8569966	bottlecap, plastic, lid	-0.235064898	NZ	Wed Sep 30 2020	Sep	2020	Sep-2020	piece	plastic
8569963	piece, plastic	-0.235064913	NZ	Wed Sep 30 2020	Sep	2020	Sep-2020	plastic	piece
8569957	plastic, piece	-0.235064228	NZ	Wed Sep 30 2020	Sep	2020	Sep-2020	plastic	piece
8569956	plastic, piece	-0.235064514	NZ	Wed Sep 30 2020	Sep	2020	Sep-2020	plastic	piece
8569953	plastic, piece	-0.235064233	NZ	Wed Sep 30 2020	Sep	2020	Sep-2020	plastic	piece
8569952	plastic, piece	-0.235064252	NZ	Wed Sep 30 2020	Sep	2020	Sep-2020	plastic	piece
8569944	plastic, piece	-0.235064528	NZ	Wed Sep 30 2020	Sep	2020	Sep-2020	plastic	piece
8569943	plastic, piece	-0.235064415	NZ	Wed Sep 30 2020	Sep	2020	Sep-2020	plastic	piece
8569941	plastic, piece	-0.235064284	NZ	Wed Sep 30 2020	Sep	2020	Sep-2020	plastic	piece
8569939	plastic, piece	-0.235064355	NZ	Wed Sep 30 2020	Sep	2020	Sep-2020	plastic	piece
8569937	plastic, piece	-0.235064557	NZ	Wed Sep 30 2020	Sep	2020	Sep-2020	plastic	piece
8569936	plastic, piece	-0.235064346	NZ	Wed Sep 30 2020	Sep	2020	Sep-2020	plastic	piece
8569935	plastic, piece	-0.235064557	NZ	Wed Sep 30 2020	Sep	2020	Sep-2020	plastic	piece
8569934	plastic, piece	-0.23506435	NZ	Wed Sep 30 2020	Sep	2020	Sep-2020	plastic	piece
8569933	plastic, piece	-0.235064345	NZ	Wed Sep 30 2020	Sep	2020	Sep-2020	plastic	piece
8569932	plastic, piece	-0.235064351	NZ	Wed Sep 30 2020	Sep	2020	Sep-2020	plastic	piece
8569931	plastic, piece	-0.235064415	NZ	Wed Sep 30 2020	Sep	2020	Sep-2020	plastic	piece
8569930	plastic, piece	-0.235064478	NZ	Wed Sep 30 2020	Sep	2020	Sep-2020	plastic	piece
8569929	plastic, piece	-0.235064237	NZ	Wed Sep 30 2020	Sep	2020	Sep-2020	plastic	piece
8569928	plastic, piece	-0.235064355	NZ	Wed Sep 30 2020	Sep	2020	Sep-2020	plastic	piece
8569927	plastic, piece	-0.235064338	NZ	Wed Sep 30 2020	Sep	2020	Sep-2020	plastic	piece
8569915	plastic, piece	-0.235064411	NZ	Wed Sep 30 2020	Sep	2020	Sep-2020	plastic	piece
8569914	plastic, piece	-0.235064142	NZ	Wed Sep 30 2020	Sep	2020	Sep-2020	plastic	piece
8569913	plastic, piece	-0.23506437	NZ	Wed Sep 30 2020	Sep	2020	Sep-2020	plastic	piece
8569912	plastic, piece	-0.235064554	NZ	Wed Sep 30 2020	Sep	2020	Sep-2020	plastic	piece
8569911	plastic, piece	-0.235064307	NZ	Wed Sep 30 2020	Sep	2020	Sep-2020	plastic	straw
8569910	plastic, straw	-0.235064557	NZ	Wed Sep 30 2020	Sep	2020	Sep-2020	plastic	straw
8569909	plastic, straw	-0.235064557	NZ	Wed Sep 30 2020	Sep	2020	Sep-2020	plastic	piece
8569908	plastic, piece	-0.235064351	NZ	Wed Sep 30 2020	Sep	2020	Sep-2020	plastic	piece
8569907	plastic, piece	-0.235064557	NZ	Wed Sep 30 2020	Sep	2020	Sep-2020	plastic	piece
8569905	plastic, piece	-0.235064427	NZ	Wed Sep 30 2020	Sep	2020	Sep-2020	piece	plastic
8569904	piece, plastic	-0.235064151	NZ	Wed Sep 30 2020	Sep	2020	Sep-2020	plastic	piece
8569903	plastic, piece	-0.235064143	NZ	Wed Sep 30 2020	Sep	2020	Sep-2020	plastic	piece
8569902	plastic, piece	-0.235064554	NZ	Wed Sep 30 2020	Sep	2020	Sep-2020	plastic	piece
8569900	plastic, piece	-0.235064557	NZ	Wed Sep 30 2020	Sep	2020	Sep-2020	piece	plastic
8569896	piece, plastic	-0.23506404	NZ	Wed Sep 30 2020	Sep	2020	Sep-2020	piece	plastic
8569893	piece, plastic	-0.235064258	NZ	Wed Sep 30 2020	Sep	2020	Sep-2020	piece	plastic
8569892	piece, plastic	-0.235064243	NZ	Wed Sep 30 2020	Sep	2020	Sep-2020	piece	plastic
8569891	piece, plastic	-0.235064224	NZ	Wed Sep 30 2020	Sep	2020	Sep-2020	piece	plastic
8569890	piece, plastic	-0.235064103	NZ	Wed Sep 30 2020	Sep	2020	Sep-2020	piece	plastic
8569889	piece, plastic	-0.235064182	NZ	Wed Sep 30 2020	Sep	2020	Sep-2020	piece	plastic
8569888	piece, plastic	-0.235064181	NZ	Wed Sep 30 2020	Sep	2020	Sep-2020	piece	plastic
8569887	piece, plastic	-0.235064069	NZ	Wed Sep 30 2020	Sep	2020	Sep-2020	piece	plastic
8569884	piece, plastic	-0.23506421	NZ	Wed Sep 30 2020	Sep	2020	Sep-2020	piece	plastic
8569882	piece, plastic	-0.235064231	NZ	Wed Sep 30 2020	Sep	2020	Sep-2020	piece	plastic
8569880	piece, plastic	-0.235064108	NZ	Wed Sep 30 2020	Sep	2020	Sep-2020	piece	plastic
8569879	piece, plastic	-0.235064181	NZ	Wed Sep 30 2020	Sep	2020	Sep-2020	piece	plastic
8569878	piece, plastic	-0.235064182	NZ	Wed Sep 30 2020	Sep	2020	Sep-2020	piece	plastic
8569877	piece, plastic	-0.235064246	NZ	Wed Sep 30 2020	Sep	2020	Sep-2020	piece	plastic
8569876	piece, plastic	-0.235064182	NZ	Wed Sep 30 2020	Sep	2020	Sep-2020	piece	plastic
8569868	piece, plastic	-0.235064176	NZ	Wed Sep 30 2020	Sep	2020	Sep-2020	piece	plastic
8569860	piece, plastic	-0.235064269	NZ	Wed Sep 30 2020	Sep	2020	Sep-2020	piece	plastic
8569859	piece, plastic	-0.235064181	NZ	Wed Sep 30 2020	Sep	2020	Sep-2020	piece	plastic
8569858	piece, plastic	-0.235064292	NZ	Wed Sep 30 2020	Sep	2020	Sep-2020	piece	plastic
8569857	piece, plastic	-0.235064269	NZ	Wed Sep 30 2020	Sep	2020	Sep-2020	piece	plastic
8569856	piece, plastic	-0.23506428	NZ	Wed Sep 30 2020	Sep	2020	Sep-2020	piece	plastic
8569855	piece, plastic	-0.235064312	NZ	Wed Sep 30 2020	Sep	2020	Sep-2020	piece	plastic
8569854	piece, plastic	-0.235064175	NZ	Wed Sep 30 2020	Sep	2020	Sep-2020	piece	plastic
8569853	piece, plastic	-0.235064258	NZ	Wed Sep 30 2020	Sep	2020	Sep-2020	piece	plastic
8569852	piece, plastic	-0.235064255	NZ	Wed Sep 30 2020	Sep	2020	Sep-2020	piece	plastic
8569851	piece, plastic	-0.235064296	NZ	Wed Sep 30 2020	Sep	2020	Sep-2020	piece	plastic
8569850	piece, plastic	-0.235064296	NZ	Wed Sep 30 2020	Sep	2020	Sep-2020	plastic	straw
8569849	plastic, straw	-0.235064211	NZ	Wed Sep 30 2020	Sep	2020	Sep-2020	piece	plastic
8569848	piece, plastic	-0.235064195	NZ	Wed Sep 30 2020	Sep	2020	Sep-2020	piece	plastic
8569846	piece, plastic	-0.235064296	NZ	Wed Sep 30 2020	Sep	2020	Sep-2020	piece	plastic
8569845	piece, plastic	-0.235064493	NZ	Wed Sep 30 2020	Sep	2020	Sep-2020	piece	plastic
8569829	piece, plastic	-0.235064273	NZ	Wed Sep 30 2020	Sep	2020	Sep-2020	piece	plastic
8569828	piece, plastic	-0.235064273	NZ	Wed Sep 30 2020	Sep	2020	Sep-2020	piece	plastic	wrapper
8569827	piece, plastic, wrapper	-0.235064269	NZ	Wed Sep 30 2020	Sep	2020	Sep-2020	piece	plastic
8569826	piece, plastic	-0.235064273	NZ	Wed Sep 30 2020	Sep	2020	Sep-2020	piece	plastic
8569825	piece, plastic	-0.23506433	NZ	Wed Sep 30 2020	Sep	2020	Sep-2020	piece	plastic
8569824	piece, plastic	-0.235064273	NZ	Wed Sep 30 2020	Sep	2020	Sep-2020	piece	plastic
8569823	piece, plastic	-0.235064269	NZ	Wed Sep 30 2020	Sep	2020	Sep-2020	piece	plastic
8569822	piece, plastic	-0.23506433	NZ	Wed Sep 30 2020	Sep	2020	Sep-2020	piece	plastic
8569820	piece, plastic	-0.235064283	NZ	Wed Sep 30 2020	Sep	2020	Sep-2020	piece	plastic
8569819	piece, plastic	-0.235064271	NZ	Wed Sep 30 2020	Sep	2020	Sep-2020	piece	plastic	wrapper
8569818	piece, plastic, wrapper	-0.235064342	NZ	Wed Sep 30 2020	Sep	2020	Sep-2020	plastic	straw
8569817	plastic, straw	-0.235064273	NZ	Wed Sep 30 2020	Sep	2020	Sep-2020	piece	plastic
8569816	piece, plastic	-0.235064272	NZ	Wed Sep 30 2020	Sep	2020	Sep-2020	piece	plastic
8569815	piece, plastic	-0.23506433	NZ	Wed Sep 30 2020	Sep	2020	Sep-2020	piece	plastic	wrapper
8569814	piece, plastic, wrapper	-0.235064404	NZ	Wed Sep 30 2020	Sep	2020	Sep-2020	plastic	piece
8569808	plastic, piece	-0.235064207	NZ	Wed Sep 30 2020	Sep	2020	Sep-2020	plastic	piece
8569802	plastic, piece	-0.235064207	NZ	Wed Sep 30 2020	Sep	2020	Sep-2020	plastic	piece
8569801	plastic, piece	-0.235064299	NZ	Wed Sep 30 2020	Sep	2020	Sep-2020	plastic	piece
8569798	plastic, piece	-0.235064259	NZ	Wed Sep 30 2020	Sep	2020	Sep-2020	piece	plastic	wrapper
8569797	piece, plastic, wrapper	-0.235064255	NZ	Wed Sep 30 2020	Sep	2020	Sep-2020	piece	plastic	wrapper
8569796	piece, plastic, wrapper	-0.235064404	NZ	Wed Sep 30 2020	Sep	2020	Sep-2020	plastic	piece
8569795	plastic, piece	-0.235064299	NZ	Wed Sep 30 2020	Sep	2020	Sep-2020	plastic	piece
8569792	plastic, piece	-0.235064125	NZ	Wed Sep 30 2020	Sep	2020	Sep-2020	plastic	piece
8569788	plastic, piece	-0.235064204	NZ	Wed Sep 30 2020	Sep	2020	Sep-2020	plastic	piece
8569787	plastic, piece	-0.235064049	NZ	Wed Sep 30 2020	Sep	2020	Sep-2020	plastic	piece
8569786	plastic, piece	-0.235064207	NZ	Wed Sep 30 2020	Sep	2020	Sep-2020	plastic	piece
8569785	plastic, piece	-0.235064219	NZ	Wed Sep 30 2020	Sep	2020	Sep-2020	piece	plastic	wrapper
8569784	piece, plastic, wrapper	-0.235064255	NZ	Wed Sep 30 2020	Sep	2020	Sep-2020	plastic	piece
8569783	plastic, piece	-0.235064234	NZ	Wed Sep 30 2020	Sep	2020	Sep-2020	plastic	piece
8569782	plastic, piece	-0.235064262	NZ	Wed Sep 30 2020	Sep	2020	Sep-2020	plastic	piece
8569780	plastic, piece	-0.235064087	NZ	Wed Sep 30 2020	Sep	2020	Sep-2020	plastic	piece
8569779	plastic, piece	-0.235064121	NZ	Wed Sep 30 2020	Sep	2020	Sep-2020	plastic	piece
8569778	plastic, piece	-0.235064107	NZ	Wed Sep 30 2020	Sep	2020	Sep-2020	plastic	piece
8569776	plastic, piece	-0.235064117	NZ	Wed Sep 30 2020	Sep	2020	Sep-2020	plastic	piece
8569775	plastic, piece	-0.235064121	NZ	Wed Sep 30 2020	Sep	2020	Sep-2020	plastic	piece
8569774	plastic, piece	-0.235064181	NZ	Wed Sep 30 2020	Sep	2020	Sep-2020	plastic	piece
8569773	plastic, piece	-0.235064218	NZ	Wed Sep 30 2020	Sep	2020	Sep-2020	plastic	piece
8569771	plastic, piece	-0.235064121	NZ	Wed Sep 30 2020	Sep	2020	Sep-2020	plastic	piece
8569770	plastic, piece	-0.2350641	NZ	Wed Sep 30 2020	Sep	2020	Sep-2020	plastic	piece
8569769	plastic, piece	-0.235064218	NZ	Wed Sep 30 2020	Sep	2020	Sep-2020	plastic	piece
8569768	plastic, piece	-0.235064107	NZ	Wed Sep 30 2020	Sep	2020	Sep-2020	plastic	piece
8569766	plastic, piece	-0.235064191	NZ	Wed Sep 30 2020	Sep	2020	Sep-2020	plastic	piece
8569765	plastic, piece	-0.235064194	NZ	Wed Sep 30 2020	Sep	2020	Sep-2020	plastic	piece
8569764	plastic, piece	-0.235064025	NZ	Wed Sep 30 2020	Sep	2020	Sep-2020	plastic	piece
8569759	plastic, piece	-0.235064194	NZ	Wed Sep 30 2020	Sep	2020	Sep-2020	plastic	piece
8569748	plastic, piece	-0.235064125	NZ	Wed Sep 30 2020	Sep	2020	Sep-2020	plastic	piece
8569747	plastic, piece	-0.235063809	NZ	Wed Sep 30 2020	Sep	2020	Sep-2020	plastic	piece
8569746	plastic, piece	-0.235063809	NZ	Wed Sep 30 2020	Sep	2020	Sep-2020	piece	plastic	wrapper
8569745	piece, plastic, wrapper	-0.235065439	NZ	Wed Sep 30 2020	Sep	2020	Sep-2020	piece	plastic	wrapper
8569744	piece, plastic, wrapper	-0.235064081	NZ	Wed Sep 30 2020	Sep	2020	Sep-2020	piece	plastic	wrapper
8569743	piece, plastic, wrapper	-0.235064055	NZ	Wed Sep 30 2020	Sep	2020	Sep-2020	piece	plastic	wrapper
8569741	piece, plastic, wrapper	-0.235063969	NZ	Wed Sep 30 2020	Sep	2020	Sep-2020	piece	plastic	wrapper
8569740	piece, plastic, wrapper	-0.235065864	NZ	Wed Sep 30 2020	Sep	2020	Sep-2020	plastic	bottlecap
8569739	plastic, bottlecap	-0.23506393	NZ	Wed Sep 30 2020	Sep	2020	Sep-2020	piece	plastic	wrapper
8569738	piece, plastic, wrapper	-0.235063827	NZ	Wed Sep 30 2020	Sep	2020	Sep-2020	piece	plastic	wrapper
8569737	piece, plastic, wrapper	-0.23506393	NZ	Wed Sep 30 2020	Sep	2020	Sep-2020	piece	plastic	wrapper
8569736	piece, plastic, wrapper	-0.235064314	NZ	Wed Sep 30 2020	Sep	2020	Sep-2020	piece	plastic	wrapper
8569735	piece, plastic, wrapper	-0.235064076	NZ	Wed Sep 30 2020	Sep	2020	Sep-2020	piece	plastic	wrapper
8569734	piece, plastic, wrapper	-0.235065672	NZ	Wed Sep 30 2020	Sep	2020	Sep-2020	piece	plastic	wrapper
8569733	piece, plastic, wrapper	-0.235063883	NZ	Wed Sep 30 2020	Sep	2020	Sep-2020	piece	plastic	wrapper
8569730	piece, plastic, wrapper	-0.235065933	NZ	Wed Sep 30 2020	Sep	2020	Sep-2020	piece	plastic	wrapper
8569729	piece, plastic, wrapper	-0.2350661	NZ	Wed Sep 30 2020	Sep	2020	Sep-2020	piece	plastic	wrapper
8569728	piece, plastic, wrapper	-0.235066099	NZ	Wed Sep 30 2020	Sep	2020	Sep-2020	piece	plastic	wrapper
8569727	piece, plastic, wrapper	-0.235066099	NZ	Wed Sep 30 2020	Sep	2020	Sep-2020	piece	plastic	wrapper
8569726	piece, plastic, wrapper	-0.235066599	NZ	Wed Sep 30 2020	Sep	2020	Sep-2020	piece	plastic	wrapper
8569725	piece, plastic, wrapper	-0.235066337	NZ	Wed Sep 30 2020	Sep	2020	Sep-2020	piece	plastic	wrapper
8569723	piece, plastic, wrapper	-0.235066276	NZ	Wed Sep 30 2020	Sep	2020	Sep-2020	plastic	bottlecap
8569722	plastic, bottlecap	-0.235066503	NZ	Wed Sep 30 2020	Sep	2020	Sep-2020	plastic	bottlecap
8569719	plastic, bottlecap	-0.235066503	NZ	Wed Sep 30 2020	Sep	2020	Sep-2020	piece	plastic	wrapper
8569716	piece, plastic, wrapper	-0.235066403	NZ	Wed Sep 30 2020	Sep	2020	Sep-2020	piece	plastic	wrapper
8569712	piece, plastic, wrapper	-0.235066603	NZ	Wed Sep 30 2020	Sep	2020	Sep-2020	piece	plastic	wrapper
8569711	piece, plastic, wrapper	-0.235066736	NZ	Wed Sep 30 2020	Sep	2020	Sep-2020	piece	plastic	wrapper
8569710	piece, plastic, wrapper	-0.235066701	NZ	Wed Sep 30 2020	Sep	2020	Sep-2020	piece	plastic	wrapper
8569709	piece, plastic, wrapper	-0.235066605	NZ	Wed Sep 30 2020	Sep	2020	Sep-2020	piece	plastic	wrapper
8569705	piece, plastic, wrapper	-0.235066508	NZ	Wed Sep 30 2020	Sep	2020	Sep-2020	piece	plastic	wrapper
8569693	piece, plastic, wrapper	-0.235067019	NZ	Wed Sep 30 2020	Sep	2020	Sep-2020	piece	plastic	wrapper
8569692	piece, plastic, wrapper	-0.235066771	NZ	Wed Sep 30 2020	Sep	2020	Sep-2020	piece	plastic	wrapper
8569691	piece, plastic, wrapper	-0.235068398	NZ	Wed Sep 30 2020	Sep	2020	Sep-2020	piece	plastic	wrapper
8569690	piece, plastic, wrapper	-0.235079856	NZ	Wed Sep 30 2020	Sep	2020	Sep-2020	piece	plastic	wrapper
8569689	piece, plastic, wrapper	-0.235066891	NZ	Wed Sep 30 2020	Sep	2020	Sep-2020	piece	plastic	wrapper
8569687	piece, plastic, wrapper	-0.235068241	NZ	Wed Sep 30 2020	Sep	2020	Sep-2020	piece	plastic	wrapper
8569686	piece, plastic, wrapper	-0.235067377	NZ	Wed Sep 30 2020	Sep	2020	Sep-2020	piece	plastic	wrapper
8569684	piece, plastic, wrapper	-0.235070469	NZ	Wed Sep 30 2020	Sep	2020	Sep-2020	piece	plastic	wrapper
8569683	piece, plastic, wrapper	-0.235079226	NZ	Wed Sep 30 2020	Sep	2020	Sep-2020	piece	plastic	wrapper
8569682	piece, plastic, wrapper	-0.235079723	NZ	Wed Sep 30 2020	Sep	2020	Sep-2020	piece	plastic	wrapper
8569681	piece, plastic, wrapper	-0.235066941	NZ	Wed Sep 30 2020	Sep	2020	Sep-2020	piece	plastic	wrapper
8569680	piece, plastic, wrapper	-0.235079815	NZ	Wed Sep 30 2020	Sep	2020	Sep-2020	piece	plastic	wrapper
8569679	piece, plastic, wrapper	-0.235079856	NZ	Wed Sep 30 2020	Sep	2020	Sep-2020	piece	plastic	wrapper
8569678	piece, plastic, wrapper	-0.235079672	NZ	Wed Sep 30 2020	Sep	2020	Sep-2020	piece	plastic	wrapper
8569677	piece, plastic, wrapper	-0.235079815	NZ	Wed Sep 30 2020	Sep	2020	Sep-2020	piece	plastic	wrapper
8569675	piece, plastic, wrapper	-0.235081208	NZ	Wed Sep 30 2020	Sep	2020	Sep-2020	wrapper	plastic	piece
8569674	wrapper, plastic, piece	-0.235083043	NZ	Wed Sep 30 2020	Sep	2020	Sep-2020	piece	plastic	wrapper
8569673	piece, plastic, wrapper	-0.235080739	NZ	Wed Sep 30 2020	Sep	2020	Sep-2020	wrapper	plastic	piece
8569672	wrapper, plastic, piece	-0.2350829	NZ	Wed Sep 30 2020	Sep	2020	Sep-2020	piece	plastic	wrapper
8569671	piece, plastic, wrapper	-0.235080441	NZ	Wed Sep 30 2020	Sep	2020	Sep-2020	wrapper	plastic	piece
8569669	wrapper, plastic, piece	-0.235082908	NZ	Wed Sep 30 2020	Sep	2020	Sep-2020	wrapper	plastic	piece
8569668	wrapper, plastic, piece	-0.235081146	NZ	Wed Sep 30 2020	Sep	2020	Sep-2020	wrapper	plastic	piece
8569667	wrapper, plastic, piece	-0.23508277	NZ	Wed Sep 30 2020	Sep	2020	Sep-2020	wrapper	plastic	piece
8569666	wrapper, plastic, piece	-0.235083036	NZ	Wed Sep 30 2020	Sep	2020	Sep-2020	wrapper	plastic	piece
8569665	wrapper, plastic, piece	-0.235082196	NZ	Wed Sep 30 2020	Sep	2020	Sep-2020	wrapper	plastic	piece
8569664	wrapper, plastic, piece	-0.235081826	NZ	Wed Sep 30 2020	Sep	2020	Sep-2020	wrapper	plastic	piece
8569662	wrapper, plastic, piece	-0.235083136	NZ	Wed Sep 30 2020	Sep	2020	Sep-2020	wrapper	plastic	piece
8569661	wrapper, plastic, piece	-0.2350823	NZ	Wed Sep 30 2020	Sep	2020	Sep-2020	plastic	bottlecap
8569660	plastic, bottlecap	-0.235082409	NZ	Wed Sep 30 2020	Sep	2020	Sep-2020	wrapper	plastic	piece
8569659	wrapper, plastic, piece	-0.235083169	NZ	Wed Sep 30 2020	Sep	2020	Sep-2020	wrapper	plastic	piece
8569655	wrapper, plastic, piece	-0.235083683	NZ	Wed Sep 30 2020	Sep	2020	Sep-2020	wrapper	plastic	piece
8569654	wrapper, plastic, piece	-0.235083737	NZ	Wed Sep 30 2020	Sep	2020	Sep-2020	wrapper	plastic	piece
8569652	wrapper, plastic, piece	-0.235083741	NZ	Wed Sep 30 2020	Sep	2020	Sep-2020	wrapper	plastic	piece
8569651	wrapper, plastic, piece	-0.235083739	NZ	Wed Sep 30 2020	Sep	2020	Sep-2020	wrapper	plastic	piece
8569650	wrapper, plastic, piece	-0.235083683	NZ	Wed Sep 30 2020	Sep	2020	Sep-2020	plastic	cdcover
8569648	plastic, cdcover	-0.235088747	NZ	Wed Sep 30 2020	Sep	2020	Sep-2020	wrapper	plastic	piece
8569647	wrapper, plastic, piece	-0.235084817	NZ	Wed Sep 30 2020	Sep	2020	Sep-2020	wrapper	plastic	piece
8569646	wrapper, plastic, piece	-0.235084279	NZ	Wed Sep 30 2020	Sep	2020	Sep-2020	plastic	wrapper
8569645	plastic, wrapper	-0.235088627	NZ	Wed Sep 30 2020	Sep	2020	Sep-2020	wrapper	plastic	piece
8569644	wrapper, plastic, piece	-0.235084381	NZ	Wed Sep 30 2020	Sep	2020	Sep-2020	plastic	wrapper
8569643	plastic, wrapper	-0.2350897	NZ	Wed Sep 30 2020	Sep	2020	Sep-2020	plastic	wrapper
8569642	plastic, wrapper	-0.235089173	NZ	Wed Sep 30 2020	Sep	2020	Sep-2020	plastic	wrapper
8569641	plastic, wrapper	-0.235088727	NZ	Wed Sep 30 2020	Sep	2020	Sep-2020	plastic	bottlecap
8569640	plastic, bottlecap	-0.235089608	NZ	Wed Sep 30 2020	Sep	2020	Sep-2020	wrapper	plastic	piece
8569638	wrapper, plastic, piece	-0.23508911	NZ	Wed Sep 30 2020	Sep	2020	Sep-2020	plastic	wrapper
8569636	plastic, wrapper	-0.235089692	NZ	Wed Sep 30 2020	Sep	2020	Sep-2020	plastic	wrapper
8569634	plastic, wrapper	-0.235090199	NZ	Wed Sep 30 2020	Sep	2020	Sep-2020	plastic	wrapper
8569632	plastic, wrapper	-0.235090238	NZ	Wed Sep 30 2020	Sep	2020	Sep-2020	plastic	wrapper
8569631	plastic, wrapper	-0.235090326	NZ	Wed Sep 30 2020	Sep	2020	Sep-2020	plastic	wrapper
8569630	plastic, wrapper	-0.235089781	NZ	Wed Sep 30 2020	Sep	2020	Sep-2020	wrapper	plastic	piece
8569629	wrapper, plastic, piece	-0.235091733	NZ	Wed Sep 30 2020	Sep	2020	Sep-2020	plastic	wrapper
8569628	plastic, wrapper	-0.235091793	NZ	Wed Sep 30 2020	Sep	2020	Sep-2020	wrapper	plastic	piece
8569626	wrapper, plastic, piece	-0.235091793	NZ	Wed Sep 30 2020	Sep	2020	Sep-2020	plastic	wrapper
8569625	plastic, wrapper	-0.235090997	NZ	Wed Sep 30 2020	Sep	2020	Sep-2020	plastic	wrapper
8569624	plastic, wrapper	-0.235091706	NZ	Wed Sep 30 2020	Sep	2020	Sep-2020	wrapper	plastic	piece
8569623	wrapper, plastic, piece	-0.235105851	NZ	Wed Sep 30 2020	Sep	2020	Sep-2020	wrapper	plastic	piece
8569622	wrapper, plastic, piece	-0.235111804	NZ	Wed Sep 30 2020	Sep	2020	Sep-2020	wrapper	plastic	piece
8569621	wrapper, plastic, piece	-0.2350936	NZ	Wed Sep 30 2020	Sep	2020	Sep-2020	wrapper	plastic	piece
8569619	wrapper, plastic, piece	-0.235111748	NZ	Wed Sep 30 2020	Sep	2020	Sep-2020	plastic	wrapper
8569617	plastic, wrapper	-0.235091819	NZ	Wed Sep 30 2020	Sep	2020	Sep-2020	piece	plastic	wrapper
8569599	piece, plastic, wrapper	-0.235111679	NZ	Wed Sep 30 2020	Sep	2020	Sep-2020	wrapper	plastic	piece
8569597	wrapper, plastic, piece	-0.235111679	NZ	Wed Sep 30 2020	Sep	2020	Sep-2020	piece	plastic	wrapper
8569596	piece, plastic, wrapper	-0.235111628	NZ	Wed Sep 30 2020	Sep	2020	Sep-2020	plastic	piece	wrapper
8569595	plastic, piece, wrapper	-0.235136392	NZ	Wed Sep 30 2020	Sep	2020	Sep-2020	plastic	piece	wrapper
8569594	plastic, piece, wrapper	-0.235136269	NZ	Wed Sep 30 2020	Sep	2020	Sep-2020	piece	plastic	wrapper
8569593	piece, plastic, wrapper	-0.235111868	NZ	Wed Sep 30 2020	Sep	2020	Sep-2020	plastic	piece	wrapper
8569592	plastic, piece, wrapper	-0.235168259	NZ	Wed Sep 30 2020	Sep	2020	Sep-2020	piece	plastic
8569590	piece, plastic	-0.235119486	NZ	Wed Sep 30 2020	Sep	2020	Sep-2020	piece	plastic	wrapper
8569589	piece, plastic, wrapper	-0.235111872	NZ	Wed Sep 30 2020	Sep	2020	Sep-2020	plastic	piece	wrapper
8569588	plastic, piece, wrapper	-0.235136312	NZ	Wed Sep 30 2020	Sep	2020	Sep-2020	piece	plastic	wrapper
8569585	piece, plastic, wrapper	-0.235112277	NZ	Wed Sep 30 2020	Sep	2020	Sep-2020	piece	plastic	wrapper
8569584	piece, plastic, wrapper	-0.235111813	NZ	Wed Sep 30 2020	Sep	2020	Sep-2020	plastic	piece	wrapper
8569583	plastic, piece, wrapper	-0.235125221	NZ	Wed Sep 30 2020	Sep	2020	Sep-2020	plastic	piece	wrapper
8569581	plastic, piece, wrapper	-0.235168259	NZ	Wed Sep 30 2020	Sep	2020	Sep-2020	plastic	piece	wrapper
8569580	plastic, piece, wrapper	-0.235136392	NZ	Wed Sep 30 2020	Sep	2020	Sep-2020	plastic	piece	wrapper
8569579	plastic, piece, wrapper	-0.235136305	NZ	Wed Sep 30 2020	Sep	2020	Sep-2020	plastic	piece	wrapper
8569578	plastic, piece, wrapper	-0.235499049	NZ	Wed Sep 30 2020	Sep	2020	Sep-2020	plastic	piece	wrapper
8569576	plastic, piece, wrapper	-0.235498773	NZ	Wed Sep 30 2020	Sep	2020	Sep-2020	plastic	piece	wrapper
8569575	plastic, piece, wrapper	-0.235500015	NZ	Wed Sep 30 2020	Sep	2020	Sep-2020	plastic	piece	wrapper
8569574	plastic, piece, wrapper	-0.235499049	NZ	Wed Sep 30 2020	Sep	2020	Sep-2020	plastic	piece	wrapper
8569573	plastic, piece, wrapper	-0.23513639	NZ	Wed Sep 30 2020	Sep	2020	Sep-2020	plastic	piece	wrapper
8569572	plastic, piece, wrapper	-0.235136305	NZ	Wed Sep 30 2020	Sep	2020	Sep-2020	plastic	piece	wrapper
8569570	plastic, piece, wrapper	-0.235136396	NZ	Wed Sep 30 2020	Sep	2020	Sep-2020	plastic	piece	wrapper
8569569	plastic, piece, wrapper	-0.235178446	NZ	Wed Sep 30 2020	Sep	2020	Sep-2020	plastic	piece	wrapper
8569568	plastic, piece, wrapper	-0.235136305	NZ	Wed Sep 30 2020	Sep	2020	Sep-2020	plastic	piece	wrapper
8569565	plastic, piece, wrapper	-0.23513631	NZ	Wed Sep 30 2020	Sep	2020	Sep-2020	plastic	piece	wrapper
8569564	plastic, piece, wrapper	-0.235498773	NZ	Wed Sep 30 2020	Sep	2020	Sep-2020	plastic	piece	wrapper
8569561	plastic, piece, wrapper	-0.235136392	NZ	Wed Sep 30 2020	Sep	2020	Sep-2020	plastic	piece	wrapper
8569560	plastic, piece, wrapper	-0.23513639	NZ	Wed Sep 30 2020	Sep	2020	Sep-2020	plastic	piece	wrapper
8521436	plastic, piece, wrapper	-0.229698682	NZ	Wed Sep 30 2020	Sep	2020	Sep-2020	plastic	piece	wrapper
8521435	plastic, piece, wrapper	-0.22969976	NZ	Wed Sep 30 2020	Sep	2020	Sep-2020	plastic	piece	wrapper
8521434	plastic, piece, wrapper	-0.229700229	NZ	Wed Sep 30 2020	Sep	2020	Sep-2020	plastic	piece	wrapper
8521433	plastic, piece, wrapper	-0.229698726	NZ	Wed Sep 30 2020	Sep	2020	Sep-2020	plastic	piece	wrapper
8521432	plastic, piece, wrapper	-0.229698728	NZ	Wed Sep 30 2020	Sep	2020	Sep-2020	plastic	piece	wrapper
8521431	plastic, piece, wrapper	-0.22969877	NZ	Wed Sep 30 2020	Sep	2020	Sep-2020	plastic	piece	wrapper
8521430	plastic, piece, wrapper	-0.229701168	NZ	Wed Sep 30 2020	Sep	2020	Sep-2020	plastic	bottlecap
8521429	plastic, bottlecap	-0.229704672	NZ	Wed Sep 30 2020	Sep	2020	Sep-2020	plastic	piece	wrapper
8521428	plastic, piece, wrapper	-0.229701624	NZ	Wed Sep 30 2020	Sep	2020	Sep-2020	plastic	piece	wrapper
8521427	plastic, piece, wrapper	-0.229703499	NZ	Wed Sep 30 2020	Sep	2020	Sep-2020	plastic	piece	wrapper
8521426	plastic, piece, wrapper	-0.22970268	NZ	Wed Sep 30 2020	Sep	2020	Sep-2020	plastic	piece	wrapper
8521425	plastic, piece, wrapper	-0.229701487	NZ	Wed Sep 30 2020	Sep	2020	Sep-2020	plastic	piece	wrapper
8521424	plastic, piece, wrapper	-0.229703999	NZ	Wed Sep 30 2020	Sep	2020	Sep-2020	plastic	bottlecap
8521423	plastic, bottlecap	-0.229703244	NZ	Wed Sep 30 2020	Sep	2020	Sep-2020	plastic	piece	wrapper
8521422	plastic, piece, wrapper	-0.229702324	NZ	Wed Sep 30 2020	Sep	2020	Sep-2020	wrapper	piece	plastic
8521421	wrapper, piece, plastic	-0.229682435	NZ	Wed Sep 30 2020	Sep	2020	Sep-2020	wrapper	piece	plastic
8521420	wrapper, piece, plastic	-0.229669959	NZ	Wed Sep 30 2020	Sep	2020	Sep-2020	plastic	piece	wrapper
8521419	plastic, piece, wrapper	-0.229702886	NZ	Wed Sep 30 2020	Sep	2020	Sep-2020	wrapper	piece	plastic
8521418	wrapper, piece, plastic	-0.229687996	NZ	Wed Sep 30 2020	Sep	2020	Sep-2020	wrapper	piece	plastic
8521417	wrapper, piece, plastic	-0.22968383	NZ	Wed Sep 30 2020	Sep	2020	Sep-2020	wrapper	piece	plastic
8521416	wrapper, piece, plastic	-0.229706961	NZ	Wed Sep 30 2020	Sep	2020	Sep-2020	bottle	plastic
8521415	bottle, plastic	-0.229697526	NZ	Wed Sep 30 2020	Sep	2020	Sep-2020	aluminum	can
8521414	aluminum, can	-0.22969872	NZ	Wed Sep 30 2020	Sep	2020	Sep-2020	balloon
8521413	balloon	-0.229694289	NZ	Wed Sep 30 2020	Sep	2020	Sep-2020	wrapper	piece	plastic
8521412	wrapper, piece, plastic	-0.229682515	NZ	Wed Sep 30 2020	Sep	2020	Sep-2020	wrapper	piece	plastic
8521411	wrapper, piece, plastic	-0.229682615	NZ	Wed Sep 30 2020	Sep	2020	Sep-2020	bag	plastic
8521410	bag, plastic	-0.229694289	NZ	Wed Sep 30 2020	Sep	2020	Sep-2020	fabric
8521409	fabric	-0.229688174	NZ	Wed Sep 30 2020	Sep	2020	Sep-2020	wrapper	piece	plastic
8521408	wrapper, piece, plastic	-0.22968247	NZ	Wed Sep 30 2020	Sep	2020	Sep-2020	wrapper	piece	plastic
8521407	wrapper, piece, plastic	-0.229669028	NZ	Wed Sep 30 2020	Sep	2020	Sep-2020	piece	plastic
8521406	piece, plastic	-0.229688634	NZ	Wed Sep 30 2020	Sep	2020	Sep-2020	wrapper	piece	plastic
8521405	wrapper, piece, plastic	-0.229672398	NZ	Wed Sep 30 2020	Sep	2020	Sep-2020	wrapper	piece	plastic
8521404	wrapper, piece, plastic	-0.229678	NZ	Wed Sep 30 2020	Sep	2020	Sep-2020	wrapper	piece	plastic
8521403	wrapper, piece, plastic	-0.229669778	NZ	Wed Sep 30 2020	Sep	2020	Sep-2020	wrapper	piece	plastic
8521402	wrapper, piece, plastic	-0.229675013	NZ	Wed Sep 30 2020	Sep	2020	Sep-2020	wrapper	piece	plastic
8521401	wrapper, piece, plastic	-0.2296706	NZ	Wed Sep 30 2020	Sep	2020	Sep-2020	plastic
8506207	plastic	-0.229709315	NZ	Tue Sep 29 2020	Sep	2020	Sep-2020	plastic
8506206	plastic	-0.229716087	NZ	Tue Sep 29 2020	Sep	2020	Sep-2020	plastic
8506205	plastic	-0.229704946	NZ	Tue Sep 29 2020	Sep	2020	Sep-2020	glass
8506204	glass	-0.229714547	NZ	Tue Sep 29 2020	Sep	2020	Sep-2020	plastic
8471586	plastic	-0.236273895	NZ	Tue Sep 29 2020	Sep	2020	Sep-2020	plastic	wrapper
8471585	plastic, wrapper	-0.236266569	NZ	Tue Sep 29 2020	Sep	2020	Sep-2020	plastic
8471584	plastic	-0.236258396	NZ	Tue Sep 29 2020	Sep	2020	Sep-2020	celluloseacetate	cigarettebutt
8471583	celluloseacetate, cigarettebutt	-0.236268225	NZ	Tue Sep 29 2020	Sep	2020	Sep-2020	plastic	wrapper
8471582	plastic, wrapper	-0.236270027	NZ	Tue Sep 29 2020	Sep	2020	Sep-2020	celluloseacetate	cigarettebutt
8471581	celluloseacetate, cigarettebutt	-0.236269579	NZ	Tue Sep 29 2020	Sep	2020	Sep-2020	cigarettebutt	celluloseacetate
8471580	cigarettebutt, celluloseacetate	-0.236270696	NZ	Tue Sep 29 2020	Sep	2020	Sep-2020	candy	plastic	wrapper	mars
8471579	candy, plastic, wrapper, mars	-0.236271353	NZ	Tue Sep 29 2020	Sep	2020	Sep-2020	celluloseacetate	cigarettebutt
8471578	celluloseacetate, cigarettebutt	-0.236267721	NZ	Tue Sep 29 2020	Sep	2020	Sep-2020	plastic
8471576	plastic	-0.2362583	NZ	Tue Sep 29 2020	Sep	2020	Sep-2020	plastic
8471575	plastic	-0.236264431	NZ	Tue Sep 29 2020	Sep	2020	Sep-2020	glass
8471574	glass	-0.236261799	NZ	Tue Sep 29 2020	Sep	2020	Sep-2020	plastic
8471573	plastic	-0.236262697	NZ	Tue Sep 29 2020	Sep	2020	Sep-2020	plastic	clothespeg
8471572	plastic, clothespeg	-0.236264558	NZ	Tue Sep 29 2020	Sep	2020	Sep-2020	plastic
8471571	plastic	-0.236258363	NZ	Tue Sep 29 2020	Sep	2020	Sep-2020	plastic	foodpackaging
8456564	plastic, foodpackaging	-0.229896472	NZ	Mon Sep 28 2020	Sep	2020	Sep-2020	plastic	soysauce fish
8456563	plastic, soysauce fish	-0.229896472	NZ	Mon Sep 28 2020	Sep	2020	Sep-2020	metal	vapecartridge
8456562	metal, vapecartridge	-0.229896811	NZ	Mon Sep 28 2020	Sep	2020	Sep-2020	plastic
8456561	plastic	-0.229896879	NZ	Mon Sep 28 2020	Sep	2020	Sep-2020	plastic	cottonbud
8456560	plastic, cottonbud	-0.229897139	NZ	Mon Sep 28 2020	Sep	2020	Sep-2020	plastic	wrapper
8456559	plastic, wrapper	-0.229985622	NZ	Mon Sep 28 2020	Sep	2020	Sep-2020	plastic	bottlecap
8456558	plastic, bottlecap	-0.229897017	NZ	Mon Sep 28 2020	Sep	2020	Sep-2020	plastic	straw
8456557	plastic, straw	-0.229896968	NZ	Mon Sep 28 2020	Sep	2020	Sep-2020	aluminum	can
8456556	aluminum, can	-0.229896932	NZ	Mon Sep 28 2020	Sep	2020	Sep-2020	plastic	foodpackaging
8456555	plastic, foodpackaging	-0.229896927	NZ	Mon Sep 28 2020	Sep	2020	Sep-2020	straw	plastic
8456554	straw, plastic	-0.229896949	NZ	Mon Sep 28 2020	Sep	2020	Sep-2020	plastic	cutlery
8456553	plastic, cutlery	-0.22989694	NZ	Mon Sep 28 2020	Sep	2020	Sep-2020	plastic
8456552	plastic	-0.229898483	NZ	Mon Sep 28 2020	Sep	2020	Sep-2020	plastic	fishingline
8456551	plastic, fishingline	-0.229897139	NZ	Mon Sep 28 2020	Sep	2020	Sep-2020	plastic	lid
8456550	plastic, lid	-0.229897139	NZ	Mon Sep 28 2020	Sep	2020	Sep-2020	plastic	strawwrapper
8456549	plastic, strawwrapper	-0.229897068	NZ	Mon Sep 28 2020	Sep	2020	Sep-2020	plastic
8456548	plastic	-0.229896952	NZ	Mon Sep 28 2020	Sep	2020	Sep-2020	plastic	bathroom
8451856	plastic, bathroom	-0.229712337	NZ	Mon Sep 28 2020	Sep	2020	Sep-2020	paper
8451855	paper	-0.22970436	NZ	Mon Sep 28 2020	Sep	2020	Sep-2020	coffeecuplid
8451854	coffeecuplid	-0.229711489	NZ	Mon Sep 28 2020	Sep	2020	Sep-2020	plastic	piece
8451853	plastic, piece	-0.229715302	NZ	Mon Sep 28 2020	Sep	2020	Sep-2020	plastic	packaging
8451852	plastic, packaging	-0.229704364	NZ	Mon Sep 28 2020	Sep	2020	Sep-2020	plastic	wrapper
8451758	plastic, wrapper	-0.229670679	NZ	Mon Sep 28 2020	Sep	2020	Sep-2020	cigarettebox	plastic
8451757	cigarettebox, plastic	-0.229672027	NZ	Mon Sep 28 2020	Sep	2020	Sep-2020	piece	plastic
8451756	piece, plastic	-0.229673157	NZ	Mon Sep 28 2020	Sep	2020	Sep-2020	plastic
[truncated: 58,809 more rows]
[truncated: 7 more columns]
