# Supplementary material for: Lockdown Litter: A critical analysis of global COVID-19 PPE litter and measures for mitigation
Source: Research Square preprint supplement (doi:10.21203/rs.3.rs-134183/v1), 2021-03-31
Supplement: Supplementary file 4 [file ae855d739fbba5f06ec797dd.csv]

Litter		Location (Lat/Long)	Country	Date				Tags
8665231		51.9889848086979/-0.805194838601021	GB	Fri Oct 02 2020	Oct	2020	Oct-2020	plastic	cup			mask
8632164		51.8058539070601/-0.289487097494314	GB	Thu Oct 01 2020	Oct	2020	Oct-2020	cigarettebutt
8632163		51.8058598662399/-0.289485675439091	GB	Thu Oct 01 2020	Oct	2020	Oct-2020	paper
8632162		51.8061783176612/-0.291996237927162	GB	Thu Oct 01 2020	Oct	2020	Oct-2020	plastic	bottle
8632157		51.8058398036564/-0.289476750897631	GB	Thu Oct 01 2020	Oct	2020	Oct-2020	babywipe
8632154		51.8055273728694/-0.292717750005397	GB	Thu Oct 01 2020	Oct	2020	Oct-2020	paper
8632152		51.8055481866304/-0.292715631985288	GB	Thu Oct 01 2020	Oct	2020	Oct-2020	plastic	bottle
8632148		51.8059172626987/-0.290598967242215	GB	Thu Oct 01 2020	Oct	2020	Oct-2020	beer	can	aluminum
8632147		51.8059024383883/-0.290621926387773	GB	Thu Oct 01 2020	Oct	2020	Oct-2020	wrapper
8632146		51.8058637161608/-0.290516854585777	GB	Thu Oct 01 2020	Oct	2020	Oct-2020	paper
8632145		51.8057975065861/-0.289916794502988	GB	Thu Oct 01 2020	Oct	2020	Oct-2020	paper
8632144		51.8058454306015/-0.290469506600805	GB	Thu Oct 01 2020	Oct	2020	Oct-2020	babywipe
8632143		51.8058038312303/-0.289899032100202	GB	Thu Oct 01 2020	Oct	2020	Oct-2020	cigarettepack
8632142		51.8058497942166/-0.289649347187282	GB	Thu Oct 01 2020	Oct	2020	Oct-2020	babywipe
8632141		51.805763067427/-0.288390192039422	GB	Thu Oct 01 2020	Oct	2020	Oct-2020	paper	coffeecup
8632140		51.8057995620178/-0.289793485277721	GB	Thu Oct 01 2020	Oct	2020	Oct-2020	babywipe
8630707		51.3441817043462/-0.742895453542447	GB	Thu Oct 01 2020	Oct	2020	Oct-2020	plastic	bottle
8630706		51.3444189679508/-0.743144032028408	GB	Thu Oct 01 2020	Oct	2020	Oct-2020	coffeecup
8630705		51.3444313840353/-0.742959074659557	GB	Thu Oct 01 2020	Oct	2020	Oct-2020	paper	wrapper
8630704		51.3444562127895/-0.742894123642967	GB	Thu Oct 01 2020	Oct	2020	Oct-2020	candywrapper
8630699		51.3444313840353/-0.742959074659557	GB	Thu Oct 01 2020	Oct	2020	Oct-2020	plastic	wrapper
8630698		51.3448274089502/-0.733028277755466	GB	Thu Oct 01 2020	Oct	2020	Oct-2020	aluminum	can	cocacola	coke zero
8630697		51.3448223798083/-0.74157027527759	GB	Thu Oct 01 2020	Oct	2020	Oct-2020	ring can holder
8630696		51.3460603741262/-0.733918546460118	GB	Thu Oct 01 2020	Oct	2020	Oct-2020	crisps	crisppacket
8630695		51.3460603741262/-0.733918546460118	GB	Thu Oct 01 2020	Oct	2020	Oct-2020	aluminum	can	fanta	drink	soda	metal
8630694		51.3467332952866/-0.733418348193866	GB	Thu Oct 01 2020	Oct	2020	Oct-2020	paper	cigarette packaging
8630692		51.3460603741262/-0.733918546460118	GB	Thu Oct 01 2020	Oct	2020	Oct-2020	bottle	plastic	waterbottle
8630691		51.3460603741262/-0.733918546460118	GB	Thu Oct 01 2020	Oct	2020	Oct-2020	crisppacket
8630690		51.3460603741262/-0.733918546460118	GB	Thu Oct 01 2020	Oct	2020	Oct-2020	plastic	plasticbag
8630688		51.3436761929474/-0.736166605411367	GB	Thu Oct 01 2020	Oct	2020	Oct-2020	aluminum	cocacola	can	metal
8630687		51.3436761929474/-0.736166605411367	GB	Thu Oct 01 2020	Oct	2020	Oct-2020	plastic	bottle
8630351		51.7456429543878/-3.34265893098902	GB	Thu Oct 01 2020	Oct	2020	Oct-2020	aluminum	can	cocacola
8630350		51.7456643060041/-3.34265541036476	GB	Thu Oct 01 2020	Oct	2020	Oct-2020	aluminum	can	pepsi
8630349		51.7455727112069/-3.34273308708734	GB	Thu Oct 01 2020	Oct	2020	Oct-2020	plastic	cup
8630348		51.7456164952675/-3.34270353318614	GB	Thu Oct 01 2020	Oct	2020	Oct-2020	plastic	bottle	cocacola
8630347		51.7456987709463/-3.34268792244638	GB	Thu Oct 01 2020	Oct	2020	Oct-2020	plastic	bottle	vimto
8630346		51.7456966073511/-3.34265185744878	GB	Thu Oct 01 2020	Oct	2020	Oct-2020	aluminum	can
8630341		51.7457040488664/-3.34260880232425	GB	Thu Oct 01 2020	Oct	2020	Oct-2020	aluminum	can
8630340		51.7456868820074/-3.34274483928182	GB	Thu Oct 01 2020	Oct	2020	Oct-2020	plastic	coffeecuplid
8630331		51.7458566413037/-3.34292561329636	GB	Thu Oct 01 2020	Oct	2020	Oct-2020	piece	plastic
8630329		51.7456725525689/-3.34274033754656	GB	Thu Oct 01 2020	Oct	2020	Oct-2020	cigarette	butt
8630327		51.7456642128985/-3.34275070064424	GB	Thu Oct 01 2020	Oct	2020	Oct-2020	plastic	bottlecap
8630326		51.7456454517071/-3.34275743539178	GB	Thu Oct 01 2020	Oct	2020	Oct-2020	cigarette	butt
8630325		51.7456662316711/-3.342733054971	GB	Thu Oct 01 2020	Oct	2020	Oct-2020	cigarette	butt
8630323		51.7456725525689/-3.34274033754656	GB	Thu Oct 01 2020	Oct	2020	Oct-2020	cigarette	butt
8630322		51.7456662316711/-3.342733054971	GB	Thu Oct 01 2020	Oct	2020	Oct-2020	cigarette	butt
8630321		51.7456756180848/-3.34265826463611	GB	Thu Oct 01 2020	Oct	2020	Oct-2020	aluminum	cup
8630320		51.745669440672/-3.342698085025	GB	Thu Oct 01 2020	Oct	2020	Oct-2020	plastic	panel
8630319		51.7456608695892/-3.34265858081755	GB	Thu Oct 01 2020	Oct	2020	Oct-2020	paper	wrapper
8630318		51.7456846765158/-3.34271365820473	GB	Thu Oct 01 2020	Oct	2020	Oct-2020	can	aluminum	redbull
8630317		51.7456835909266/-3.34271809193534	GB	Thu Oct 01 2020	Oct	2020	Oct-2020	cutlery	fork	plastic
8630316		51.7456662316711/-3.342733054971	GB	Thu Oct 01 2020	Oct	2020	Oct-2020	butt	cigarette
8630315		51.7456662898075/-3.34270572564001	GB	Thu Oct 01 2020	Oct	2020	Oct-2020	aluminum	can	7up
8630313		51.7456679876523/-3.34271400040825	GB	Thu Oct 01 2020	Oct	2020	Oct-2020	aluminum	can	fanta
8629983		51.8117009662574/-0.295357396826423	GB	Thu Oct 01 2020	Oct	2020	Oct-2020	golf tee
8629982		51.8117392715549/-0.295373406261481	GB	Thu Oct 01 2020	Oct	2020	Oct-2020	tissue
8629981		51.8116731383389/-0.295276092365659	GB	Thu Oct 01 2020	Oct	2020	Oct-2020	wrapper
8629980		51.8117392715549/-0.295373406261481	GB	Thu Oct 01 2020	Oct	2020	Oct-2020	dogpoobag
8629979		51.8117020139953/-0.295293442905224	GB	Thu Oct 01 2020	Oct	2020	Oct-2020	plastic
8629978		51.8116742279863/-0.295302830636776	GB	Thu Oct 01 2020	Oct	2020	Oct-2020	cigarette
8629977		51.8052266166097/-0.306576909497666	GB	Thu Oct 01 2020	Oct	2020	Oct-2020	plastic	saucepacket
8629976		51.8115959054866/-0.295552067944648	GB	Thu Oct 01 2020	Oct	2020	Oct-2020	plastic
8629975		51.805154909428/-0.307137575000811	GB	Thu Oct 01 2020	Oct	2020	Oct-2020	cigarette
8629974		51.8049851758888/-0.307873338461209	GB	Thu Oct 01 2020	Oct	2020	Oct-2020	piece
8629973		51.8051840365415/-0.307098347693968	GB	Thu Oct 01 2020	Oct	2020	Oct-2020	plastic
8629972		51.8052767403906/-0.306228306144761	GB	Thu Oct 01 2020	Oct	2020	Oct-2020	plastic
8629971		51.806443249855/-0.303225489333554	GB	Thu Oct 01 2020	Oct	2020	Oct-2020	cigarette
8629970		51.8070804002246/-0.301713729277534	GB	Thu Oct 01 2020	Oct	2020	Oct-2020	wrapper
8629969		51.806345433045/-0.30307235196261	GB	Thu Oct 01 2020	Oct	2020	Oct-2020	plastic
8629968		51.8076497409975/-0.301361689344329	GB	Thu Oct 01 2020	Oct	2020	Oct-2020	plastic
8629966		51.8078991864359/-0.301126996055526	GB	Thu Oct 01 2020	Oct	2020	Oct-2020	plastic
8629965		51.8076033471635/-0.301446681842489	GB	Thu Oct 01 2020	Oct	2020	Oct-2020	plastic
8629964		51.8080820795631/-0.300890626386088	GB	Thu Oct 01 2020	Oct	2020	Oct-2020	plastic
8629963		51.8079924351087/-0.300941588357371	GB	Thu Oct 01 2020	Oct	2020	Oct-2020	plastic
8629962		51.8081397470569/-0.300749558955711	GB	Thu Oct 01 2020	Oct	2020	Oct-2020	cigarette
8629960		51.8083026912546/-0.300732376054209	GB	Thu Oct 01 2020	Oct	2020	Oct-2020	headphones	broken
8629959		51.8083165633043/-0.300692562014145	GB	Thu Oct 01 2020	Oct	2020	Oct-2020	plastic
8629958		51.8088789051881/-0.300195096060913	GB	Thu Oct 01 2020	Oct	2020	Oct-2020	cigarette
8629956		51.8085510889551/-0.300463819876593	GB	Thu Oct 01 2020	Oct	2020	Oct-2020	can	redbull
8629955		51.8083238555601/-0.300674708560389	GB	Thu Oct 01 2020	Oct	2020	Oct-2020	rubber
8629954		51.8084160145855/-0.300608826801461	GB	Thu Oct 01 2020	Oct	2020	Oct-2020	cigarette
8629952		51.8084647134429/-0.30054671689896	GB	Thu Oct 01 2020	Oct	2020	Oct-2020	plastic
8629949		51.8085493287554/-0.300465915352386	GB	Thu Oct 01 2020	Oct	2020	Oct-2020	plastic
8629944		51.8086061161494/-0.300417635590118	GB	Thu Oct 01 2020	Oct	2020	Oct-2020	plastic
8629942		51.8086885521671/-0.30035762116341	GB	Thu Oct 01 2020	Oct	2020	Oct-2020	tissue
8629940		51.8087307969591/-0.300261648372095	GB	Thu Oct 01 2020	Oct	2020	Oct-2020	cigarette
8629939		51.8086965149751/-0.300310179591459	GB	Thu Oct 01 2020	Oct	2020	Oct-2020	cigarette
8629937		51.8089905521384/-0.300030224025529	GB	Thu Oct 01 2020	Oct	2020	Oct-2020	plastic
8629936		51.808948768351/-0.300134746358078	GB	Thu Oct 01 2020	Oct	2020	Oct-2020	cigarette
8629934		51.8090338446682/-0.300082108006161	GB	Thu Oct 01 2020	Oct	2020	Oct-2020	plastic
8629933		51.8092717230802/-0.299575421959441	GB	Thu Oct 01 2020	Oct	2020	Oct-2020	cigarette
8629932		51.8091889517864/-0.299709029495995	GB	Thu Oct 01 2020	Oct	2020	Oct-2020	plastic
8629931		51.8091992196178/-0.299662090838235	GB	Thu Oct 01 2020	Oct	2020	Oct-2020	cigarette
8629930		51.8092609942442/-0.299581037834566	GB	Thu Oct 01 2020	Oct	2020	Oct-2020	cigarette
8629929		51.8092011474555/-0.29967508278815	GB	Thu Oct 01 2020	Oct	2020	Oct-2020	cigarette
8629928		51.8093629181867/-0.299444077536743	GB	Thu Oct 01 2020	Oct	2020	Oct-2020	cigarette
8629927		51.8095514690986/-0.299172336235921	GB	Thu Oct 01 2020	Oct	2020	Oct-2020	ringpull
8629925		51.8093618704489/-0.299420775845926	GB	Thu Oct 01 2020	Oct	2020	Oct-2020	plastic
8629924		51.8093666062241/-0.299289347604196	GB	Thu Oct 01 2020	Oct	2020	Oct-2020	plastic
8629923		51.8094073422736/-0.299468133598845	GB	Thu Oct 01 2020	Oct	2020	Oct-2020	papercup	mcdonald's
8629922		51.8093943503236/-0.299396300688665	GB	Thu Oct 01 2020	Oct	2020	Oct-2020	plastic	bottle
8629921		51.8093627924582/-0.29940585605828	GB	Thu Oct 01 2020	Oct	2020	Oct-2020	plastic
8629920		51.8093415862432/-0.299420692026894	GB	Thu Oct 01 2020	Oct	2020	Oct-2020	can
8629918		51.8095200788712/-0.299156326800863	GB	Thu Oct 01 2020	Oct	2020	Oct-2020	cigarette
8629917		51.8094660575053/-0.299225309863965	GB	Thu Oct 01 2020	Oct	2020	Oct-2020	papercup	mcdonalds
8629916		51.8092907500004/-0.299417590722721	GB	Thu Oct 01 2020	Oct	2020	Oct-2020	paper
8629915		51.8096104776969/-0.299106035381834	GB	Thu Oct 01 2020	Oct	2020	Oct-2020	cigarette
8629914		51.8097766908368/-0.299033951014559	GB	Thu Oct 01 2020	Oct	2020	Oct-2020	wetwipe
8629913		51.8096466036996/-0.299081560224573	GB	Thu Oct 01 2020	Oct	2020	Oct-2020	cigarette
8629900		51.8097730866185/-0.298957172781507	GB	Thu Oct 01 2020	Oct	2020	Oct-2020	cigarette
8629899		51.8096273253223/-0.299096480012219	GB	Thu Oct 01 2020	Oct	2020	Oct-2020	cigarette
8629897		51.8096273253223/-0.299096480012219	GB	Thu Oct 01 2020	Oct	2020	Oct-2020	cigarette
8629896		51.8097131141013/-0.299089858308713	GB	Thu Oct 01 2020	Oct	2020	Oct-2020	bottlecap	plastic
8629894		51.8109624786785/-0.29687192291049	GB	Thu Oct 01 2020	Oct	2020	Oct-2020	wrapper
8629892		51.8097219150996/-0.298901516944448	GB	Thu Oct 01 2020	Oct	2020	Oct-2020	wrapper
8629891		51.8099299120268/-0.298769585788528	GB	Thu Oct 01 2020	Oct	2020	Oct-2020	cigarette
8629890		51.809894749943/-0.298759108409564	GB	Thu Oct 01 2020	Oct	2020	Oct-2020	cigarette
8629889		51.8097904790675/-0.298782829195539	GB	Thu Oct 01 2020	Oct	2020	Oct-2020	plastic
8629888		51.8099047663173/-0.298793558031599	GB	Thu Oct 01 2020	Oct	2020	Oct-2020	bottle	peroni
8629887		51.8099597935116/-0.298713846132437	GB	Thu Oct 01 2020	Oct	2020	Oct-2020	cigarette
8629886		51.8099580752215/-0.298752989620249	GB	Thu Oct 01 2020	Oct	2020	Oct-2020	cigarette
8629885		51.8099875376111/-0.298600355163495	GB	Thu Oct 01 2020	Oct	2020	Oct-2020	cigarette
8629884		51.8099748809373/-0.298745362088362	GB	Thu Oct 01 2020	Oct	2020	Oct-2020	cigarette
8629881		51.8102560937887/-0.298239681870023	GB	Thu Oct 01 2020	Oct	2020	Oct-2020	cigarette
8629880		51.8099851487687/-0.298763886094372	GB	Thu Oct 01 2020	Oct	2020	Oct-2020	wrapper
8629879		51.810044157367/-0.298576382920424	GB	Thu Oct 01 2020	Oct	2020	Oct-2020	cigarette
8629877		51.8101717299333/-0.298410505056659	GB	Thu Oct 01 2020	Oct	2020	Oct-2020	cigarette
8629872		51.810176172342/-0.298471441492716	GB	Thu Oct 01 2020	Oct	2020	Oct-2020	plastic
8629871		51.8101997254899/-0.298355687409917	GB	Thu Oct 01 2020	Oct	2020	Oct-2020	cigarette
8629870		51.8101525772845/-0.298408912495057	GB	Thu Oct 01 2020	Oct	2020	Oct-2020	cigarette
8629868		51.8102121307066/-0.298294499516765	GB	Thu Oct 01 2020	Oct	2020	Oct-2020	cigarette
8629867		51.8104523560515/-0.297997612506429	GB	Thu Oct 01 2020	Oct	2020	Oct-2020	plastic
8629866		51.8102525733894/-0.29825954698054	GB	Thu Oct 01 2020	Oct	2020	Oct-2020	cigarette
8629865		51.8102398748061/-0.298249991610924	GB	Thu Oct 01 2020	Oct	2020	Oct-2020	cigarette
8629861		51.8103135936445/-0.298109175637642	GB	Thu Oct 01 2020	Oct	2020	Oct-2020	cigarette
8629860		51.8104871409496/-0.297936173156181	GB	Thu Oct 01 2020	Oct	2020	Oct-2020	bottle	plastic
8629859		51.8104249472281/-0.29797079041628	GB	Thu Oct 01 2020	Oct	2020	Oct-2020	wrapper
8629857		51.8104369333496/-0.297790411860028	GB	Thu Oct 01 2020	Oct	2020	Oct-2020	cigarette
8629847		51.8105430482438/-0.297898119315782	GB	Thu Oct 01 2020	Oct	2020	Oct-2020	wrapper
8629846		51.8103998434281/-0.297773228958526	GB	Thu Oct 01 2020	Oct	2020	Oct-2020	cigarette
8629839		51.8104689941293/-0.297793680802265	GB	Thu Oct 01 2020	Oct	2020	Oct-2020	plastic
8629834		51.8105480773857/-0.297722183168212	GB	Thu Oct 01 2020	Oct	2020	Oct-2020	cigarette
8629832		51.8106878037116/-0.297485897317806	GB	Thu Oct 01 2020	Oct	2020	Oct-2020	cigarette
8629830		51.8106264437513/-0.297548514714561	GB	Thu Oct 01 2020	Oct	2020	Oct-2020	straw	plastic
8629829		51.8106520968041/-0.297687482089081	GB	Thu Oct 01 2020	Oct	2020	Oct-2020	cigarette
8629828		51.8108549388608/-0.297077698633351	GB	Thu Oct 01 2020	Oct	2020	Oct-2020	paper
8629827		51.810840815354/-0.296885501593628	GB	Thu Oct 01 2020	Oct	2020	Oct-2020	cigarette
8629824		51.8108391808828/-0.297091025859394	GB	Thu Oct 01 2020	Oct	2020	Oct-2020	cigarette
8629798		51.810910491291/-0.29699438404381	GB	Thu Oct 01 2020	Oct	2020	Oct-2020	cigarette
8629795		51.8110805377847/-0.296343108639397	GB	Thu Oct 01 2020	Oct	2020	Oct-2020	cigarette
8629793		51.8111243332287/-0.296393651515521	GB	Thu Oct 01 2020	Oct	2020	Oct-2020	cigarette
8629791		51.8110023346281/-0.296875946224012	GB	Thu Oct 01 2020	Oct	2020	Oct-2020	plastic
8629790		51.8112832541129/-0.296212602407016	GB	Thu Oct 01 2020	Oct	2020	Oct-2020	plastic
8629789		51.8115475200765/-0.2956628865955	GB	Thu Oct 01 2020	Oct	2020	Oct-2020	plastic	lid
8629788		51.8114194181299/-0.295736761763967	GB	Thu Oct 01 2020	Oct	2020	Oct-2020	piece	metal
8628033		51.5666266/-0.0762171	GB	Thu Oct 01 2020	Oct	2020	Oct-2020	ppe
8626529		50.9333979/-1.3709761	GB	Thu Oct 01 2020	Oct	2020	Oct-2020	facemask
8624933		50.9292888/-1.3656023	GB	Thu Oct 01 2020	Oct	2020	Oct-2020	facemask
8624866		50.9292888/-1.3656023	GB	Thu Oct 01 2020	Oct	2020	Oct-2020	facemask
8622586		51.8069358353489/-0.286366992933559	GB	Thu Oct 01 2020	Oct	2020	Oct-2020	wrapper
8622585		51.8072282092861/-0.286122816308804	GB	Thu Oct 01 2020	Oct	2020	Oct-2020	paper
8622584		51.805857193187/-0.287777486261967	GB	Thu Oct 01 2020	Oct	2020	Oct-2020	babywipe
8622583		51.8058081116674/-0.288027368979486	GB	Thu Oct 01 2020	Oct	2020	Oct-2020	paper
8622582		51.8071435961984/-0.286028120009253	GB	Thu Oct 01 2020	Oct	2020	Oct-2020	cokecan
8622581		51.8059670153233/-0.2877679639707	GB	Thu Oct 01 2020	Oct	2020	Oct-2020	wrapper
8622580		51.8061927035114/-0.287878624971946	GB	Thu Oct 01 2020	Oct	2020	Oct-2020	paper
8622579		51.8061459536611/-0.287788129094095	GB	Thu Oct 01 2020	Oct	2020	Oct-2020	paper
8622578		51.8061582818734/-0.287836709299327	GB	Thu Oct 01 2020	Oct	2020	Oct-2020	plastic glove
8622577		51.8069403478497/-0.286522361109509	GB	Thu Oct 01 2020	Oct	2020	Oct-2020	tablet	strip
8622576		51.8062806162044/-0.287645732961924	GB	Thu Oct 01 2020	Oct	2020	Oct-2020	plastic	wrapper
8622575		51.8062856827394/-0.287600872507795	GB	Thu Oct 01 2020	Oct	2020	Oct-2020	facemask
8622574		51.8071336376906/-0.28595297243422	GB	Thu Oct 01 2020	Oct	2020	Oct-2020	wrapper
8621575		51.8070959622519/-0.28594171091799	GB	Thu Oct 01 2020	Oct	2020	Oct-2020	wrapper
8621574		51.8071244719138/-0.286012211173327	GB	Thu Oct 01 2020	Oct	2020	Oct-2020	wrapper
8621573		51.8071218279608/-0.286030241165837	GB	Thu Oct 01 2020	Oct	2020	Oct-2020	lager	can
8621536		51.8071893712999/-0.286010951070756	GB	Thu Oct 01 2020	Oct	2020	Oct-2020	plastic
8621535		51.8071672262206/-0.286064261606992	GB	Thu Oct 01 2020	Oct	2020	Oct-2020	mcdonalds
8621534		51.8071922962332/-0.286017556751704	GB	Thu Oct 01 2020	Oct	2020	Oct-2020	lager	can
8621524		51.8071304661861/-0.286012680985156	GB	Thu Oct 01 2020	Oct	2020	Oct-2020	beer	drink
8621522		51.8071324547479/-0.285951754216681	GB	Thu Oct 01 2020	Oct	2020	Oct-2020	beer can
8621516		51.8071103710434/-0.285937746788876	GB	Thu Oct 01 2020	Oct	2020	Oct-2020	cider	can
8621508		51.8070760211975/-0.285949559692731	GB	Thu Oct 01 2020	Oct	2020	Oct-2020	wrapper
8621507		51.8070943955879/-0.285959576188393	GB	Thu Oct 01 2020	Oct	2020	Oct-2020	plastic
8621505		51.8070837611838/-0.285957291525006	GB	Thu Oct 01 2020	Oct	2020	Oct-2020	plastic
8621503		51.8071378974277/-0.285932342801579	GB	Thu Oct 01 2020	Oct	2020	Oct-2020	plastic
8621499		51.8071758108639/-0.285958684232361	GB	Thu Oct 01 2020	Oct	2020	Oct-2020	coke	can
8621496		51.8071844335606/-0.28601630175693	GB	Thu Oct 01 2020	Oct	2020	Oct-2020	plastic	bottle
8621491		51.8071745499529/-0.286028480949283	GB	Thu Oct 01 2020	Oct	2020	Oct-2020	wrapper
8621489		51.8071852302784/-0.286009406520955	GB	Thu Oct 01 2020	Oct	2020	Oct-2020	plastic
8621487		51.8070010689042/-0.286162821667717	GB	Thu Oct 01 2020	Oct	2020	Oct-2020	straw
8620743		51.8068987557292/-0.28613627128114	GB	Thu Oct 01 2020	Oct	2020	Oct-2020	wrapper
8620741		51.8053624811012/-0.285950817802706	GB	Thu Oct 01 2020	Oct	2020	Oct-2020	tissue
8620738		51.8053610411957/-0.285930659911524	GB	Thu Oct 01 2020	Oct	2020	Oct-2020	tissue
8619864		51.8048151697599/-0.285823580522224	GB	Thu Oct 01 2020	Oct	2020	Oct-2020	wrapper
8619863		51.8041468489843/-0.28608375230489	GB	Thu Oct 01 2020	Oct	2020	Oct-2020	wrapper
8619862		51.8048152078409/-0.285826574880147	GB	Thu Oct 01 2020	Oct	2020	Oct-2020	lager	can
8619861		51.8041788311901/-0.286064369730275	GB	Thu Oct 01 2020	Oct	2020	Oct-2020	plastic
8619858		51.8049566981747/-0.285734898120694	GB	Thu Oct 01 2020	Oct	2020	Oct-2020	lager	can
8619856		51.8041509236296/-0.286125109232462	GB	Thu Oct 01 2020	Oct	2020	Oct-2020	wrapper
8619853		51.8048159961008/-0.285813154731272	GB	Thu Oct 01 2020	Oct	2020	Oct-2020	drink can
8619852		51.8041241909795/-0.286061512404441	GB	Thu Oct 01 2020	Oct	2020	Oct-2020	crisppacket
8619233		51.8028960828044/-0.287377520935779	GB	Thu Oct 01 2020	Oct	2020	Oct-2020	candy	wrapper
8619232		51.8023293460859/-0.288210018853291	GB	Thu Oct 01 2020	Oct	2020	Oct-2020	coffeecup
8619231		51.8023192921658/-0.288204744343386	GB	Thu Oct 01 2020	Oct	2020	Oct-2020	plastic	coffee	lid
8619230		51.8012534720833/-0.290198198190749	GB	Thu Oct 01 2020	Oct	2020	Oct-2020	energydrinkcan
8618440		51.8009542550757/-0.291852385865787	GB	Thu Oct 01 2020	Oct	2020	Oct-2020	plastic	bottle
8618439		51.800951477556/-0.291857741793145	GB	Thu Oct 01 2020	Oct	2020	Oct-2020	wrapper
8618438		51.8009513026069/-0.291858213764784	GB	Thu Oct 01 2020	Oct	2020	Oct-2020	wrapper
8618437		51.8009511722549/-0.291861865392366	GB	Thu Oct 01 2020	Oct	2020	Oct-2020	lager	can
8618436		51.8009442284917/-0.291866295704797	GB	Thu Oct 01 2020	Oct	2020	Oct-2020	lager	can
8618435		51.800858763865/-0.292581853178918	GB	Thu Oct 01 2020	Oct	2020	Oct-2020	paper
8618158		51.8010590053829/-0.291425884805561	GB	Thu Oct 01 2020	Oct	2020	Oct-2020	babywipe
8618157		51.8010626095962/-0.291488426002657	GB	Thu Oct 01 2020	Oct	2020	Oct-2020	paper
8618156		51.8009900385642/-0.291981174235774	GB	Thu Oct 01 2020	Oct	2020	Oct-2020	polystyrene	wrapper
8618155		51.800857717449/-0.292836168176219	GB	Thu Oct 01 2020	Oct	2020	Oct-2020	bag
8618154		51.8011060632128/-0.290727907165402	GB	Thu Oct 01 2020	Oct	2020	Oct-2020	plasticbottle
8618153		51.8008538390687/-0.292852405494758	GB	Thu Oct 01 2020	Oct	2020	Oct-2020	lager	can
8618152		51.8011946731645/-0.290712096746453	GB	Thu Oct 01 2020	Oct	2020	Oct-2020	takeaway	wrapper
8618151		51.8011075052092/-0.291105915739409	GB	Thu Oct 01 2020	Oct	2020	Oct-2020	aluminum	can	drink
8618150		51.8010711751058/-0.291409766380731	GB	Thu Oct 01 2020	Oct	2020	Oct-2020	babywipe
8618149		51.8010738949757/-0.291320992690419	GB	Thu Oct 01 2020	Oct	2020	Oct-2020	babywipe
8618148		51.8010877048552/-0.291210834065252	GB	Thu Oct 01 2020	Oct	2020	Oct-2020	can	drink
8618147		51.801051524841/-0.291359396990781	GB	Thu Oct 01 2020	Oct	2020	Oct-2020	babywipe
8618145		51.8009863165901/-0.291984365416536	GB	Thu Oct 01 2020	Oct	2020	Oct-2020	redbull
8617326		51.8004918104415/-0.294898634344058	GB	Thu Oct 01 2020	Oct	2020	Oct-2020	facemask
8617325		51.8004845581392/-0.29489495595282	GB	Thu Oct 01 2020	Oct	2020	Oct-2020	drink	can
8617324		51.8012638078274/-0.29632085045235	GB	Thu Oct 01 2020	Oct	2020	Oct-2020	plastic	bottle
8617323		51.8008196838731/-0.29352355562968	GB	Thu Oct 01 2020	Oct	2020	Oct-2020	paper
8617322		51.8008058949397/-0.293736831231709	GB	Thu Oct 01 2020	Oct	2020	Oct-2020	metal can lid
8617321		51.8008189244715/-0.293526333534034	GB	Thu Oct 01 2020	Oct	2020	Oct-2020	plastic
8617320		51.8007712930108/-0.293859767430574	GB	Thu Oct 01 2020	Oct	2020	Oct-2020	drink can
8617319		51.800808653825/-0.293734818445027	GB	Thu Oct 01 2020	Oct	2020	Oct-2020	pulltab
8617318		51.8007597193785/-0.293909984809461	GB	Thu Oct 01 2020	Oct	2020	Oct-2020	plastic	bottle
8617316		51.8007708725162/-0.293871303984617	GB	Thu Oct 01 2020	Oct	2020	Oct-2020	wrapper
8617313		51.8017631497356/-0.296025051027325	GB	Thu Oct 01 2020	Oct	2020	Oct-2020	drinkcarton
8617272		51.3426772459802/-0.744394482857735	GB	Thu Oct 01 2020	Oct	2020	Oct-2020	aluminum	can	relentless
8617269		51.3418595930848/-0.74439026447217	GB	Thu Oct 01 2020	Oct	2020	Oct-2020	bag	plastic
8617268		51.3426772459802/-0.744394482857735	GB	Thu Oct 01 2020	Oct	2020	Oct-2020	cigarpaper
8617267		51.3421896791083/-0.744305531406425	GB	Thu Oct 01 2020	Oct	2020	Oct-2020	plastic	food wrapper
8617266		51.3428610039001/-0.744403777686376	GB	Thu Oct 01 2020	Oct	2020	Oct-2020	can	energydrink
8617265		51.3417757524041/-0.744391663380679	GB	Thu Oct 01 2020	Oct	2020	Oct-2020	plastic	bag
8614101		54.6657149401071/-5.66757068038515	GB	Thu Oct 01 2020	Oct	2020	Oct-2020	plastic	piece
8614100		54.6657073125752/-5.66758241504959	GB	Thu Oct 01 2020	Oct	2020	Oct-2020	plastic	cigarette	butt	smoking
8614098		54.6657710150393/-5.6676194630616	GB	Thu Oct 01 2020	Oct	2020	Oct-2020	plastic	straw	drink
8614096		54.6657073125752/-5.66760295071236	GB	Thu Oct 01 2020	Oct	2020	Oct-2020	plastic	piece
8614095		54.6657128865408/-5.66767277196578	GB	Thu Oct 01 2020	Oct	2020	Oct-2020	plastic	cabletie
8614087		54.6656714799392/-5.66777712666026	GB	Thu Oct 01 2020	Oct	2020	Oct-2020	plastic	shotgunwad
8614086		54.665672443858/-5.66784217022887	GB	Thu Oct 01 2020	Oct	2020	Oct-2020	plastic	polystyrene	styrofoam	piece
8614085		54.6651663867662/-5.66814668759935	GB	Thu Oct 01 2020	Oct	2020	Oct-2020	can	metal	fanta	drink	cocacolacompany
8614081		54.6656493517148/-5.66769355908564	GB	Thu Oct 01 2020	Oct	2020	Oct-2020	plastic	sock	clothing
8614079		54.6656710189345/-5.66782926209799	GB	Thu Oct 01 2020	Oct	2020	Oct-2020	plastic	facemask	ppe
8614078		54.6657483000817/-5.66777100787095	GB	Thu Oct 01 2020	Oct	2020	Oct-2020	plastic	bottlecap	drink
8614077		54.6656652773308/-5.66776371561519	GB	Thu Oct 01 2020	Oct	2020	Oct-2020	plastic	facemask	ppe
8614075		54.6657006908717/-5.66776488908163	GB	Thu Oct 01 2020	Oct	2020	Oct-2020	plastic	wrapper	sweet	maoam	haribo
8614074		54.6656682109969/-5.66768039949766	GB	Thu Oct 01 2020	Oct	2020	Oct-2020	plastic	sweet	wrapper	mars	marsincorporated
8614073		54.6656724857676/-5.66767847165993	GB	Thu Oct 01 2020	Oct	2020	Oct-2020	plastic	piece	cup	drink
8614069		54.665704127452/-5.66774141975275	GB	Thu Oct 01 2020	Oct	2020	Oct-2020	plastic	lighter
8614067		54.6656997269529/-5.66768065095476	GB	Thu Oct 01 2020	Oct	2020	Oct-2020	plastic	polystyrene	styrofoam	piece
8614066		54.6657125093552/-5.66771317273906	GB	Thu Oct 01 2020	Oct	2020	Oct-2020	plastic	polystyrene	styrofoam	piece
8614065		54.6657125093552/-5.66771317273906	GB	Thu Oct 01 2020	Oct	2020	Oct-2020	plastic	polystyrene	styrofoam	piece
8614064		54.6657125093552/-5.66771317273906	GB	Thu Oct 01 2020	Oct	2020	Oct-2020	plastic	polystyrene	styrofoam	piece
8614062		54.6656986373054/-5.66770261154107	GB	Thu Oct 01 2020	Oct	2020	Oct-2020	can	metal	drink	coorslight	alcohol	molsoncoors
8614061		54.6656971704724/-5.66766137257746	GB	Thu Oct 01 2020	Oct	2020	Oct-2020	plastic	sweet	wrapper	cadburys	mondelezinternational
8614060		54.6657023253428/-5.66770923324457	GB	Thu Oct 01 2020	Oct	2020	Oct-2020	plastic	bottlecap	drink	water	deepriverrock	ccrf	cocacolacompany
8614057		54.665722651458/-5.66771476530066	GB	Thu Oct 01 2020	Oct	2020	Oct-2020	plastic	wrapper	sweet	mars	marsincorporated
8614055		54.6657168679448/-5.6677145976626	GB	Thu Oct 01 2020	Oct	2020	Oct-2020	plastic	polystyrene	piece
8614054		54.6657345537605/-5.66776153632036	GB	Thu Oct 01 2020	Oct	2020	Oct-2020	can	energydrink	drink	metal	boostdrinks	boostenergy
8614052		54.6657321230086/-5.66776002757779	GB	Thu Oct 01 2020	Oct	2020	Oct-2020	plastic	sweet	wrapper	lollipop	fruitypops	swizzels	swizzelsmatlow
8614049		54.6657313686373/-5.66776413471035	GB	Thu Oct 01 2020	Oct	2020	Oct-2020	plastic	polystyrene	piece
8614048		54.6657140180978/-5.66774955019883	GB	Thu Oct 01 2020	Oct	2020	Oct-2020	plastic	cup	drink
8614047		54.6657058038327/-5.66775960848263	GB	Thu Oct 01 2020	Oct	2020	Oct-2020	plastic	sweet	wrapper	piece	milkybar	nestle
8614041		54.6656888723883/-5.66768852994374	GB	Thu Oct 01 2020	Oct	2020	Oct-2020	plastic	bottlecap	drink
8614038		54.6656435262921/-5.66770227626494	GB	Thu Oct 01 2020	Oct	2020	Oct-2020	plastic	bottlecap	drink
8614035		54.6657157782974/-5.66777402535609	GB	Thu Oct 01 2020	Oct	2020	Oct-2020	plastic	drinklabel	water	drink	purelife	nestle
8614032		54.6656692587348/-5.66780805588296	GB	Thu Oct 01 2020	Oct	2020	Oct-2020	plastic	polystyrene	styrofoam	piece
8614030		54.6656954102727/-5.66774971783689	GB	Thu Oct 01 2020	Oct	2020	Oct-2020	plastic	sweet	wrapper	dairymilk	cadburys	mondelezinternational
8614027		54.6657405049118/-5.66776128486327	GB	Thu Oct 01 2020	Oct	2020	Oct-2020	plastic	wrapper	sweet	kinder	ferrero
8614026		54.6657274291428/-5.66774016246727	GB	Thu Oct 01 2020	Oct	2020	Oct-2020	plastic	tamponapplicator
8614024		54.665692099421/-5.66771878861419	GB	Thu Oct 01 2020	Oct	2020	Oct-2020	plastic	polystyrene	piece
8614023		54.6657008585098/-5.66763564013473	GB	Thu Oct 01 2020	Oct	2020	Oct-2020	cup	plastic	mcdonalds	drink
8614022		54.6657483419913/-5.66774594598046	GB	Thu Oct 01 2020	Oct	2020	Oct-2020	plastic	pot	sauce	mcdonalds	food
8614019		54.6657111263412/-5.66767595708898	GB	Thu Oct 01 2020	Oct	2020	Oct-2020	plastic	sweet	wrapper	mars	marsincorporated
8614018		54.665652620657/-5.66769154742888	GB	Thu Oct 01 2020	Oct	2020	Oct-2020	plastic	container	food
8614017		54.6659725998106/-5.66725459881655	GB	Thu Oct 01 2020	Oct	2020	Oct-2020	plastic	butt	cigarette	smoking
8614016		54.6659104899081/-5.66730589606396	GB	Thu Oct 01 2020	Oct	2020	Oct-2020	paper	napkin
8614013		54.6660407446834/-5.6672224961274	GB	Thu Oct 01 2020	Oct	2020	Oct-2020	plastic	butt	cigarette	smoking
8614012		54.6659946023064/-5.66746003926328	GB	Thu Oct 01 2020	Oct	2020	Oct-2020	plastic	cottonbud	stick
8614011		54.665994811854/-5.66723842174343	GB	Thu Oct 01 2020	Oct	2020	Oct-2020	plastic	butt	cigarette	smoking
8614010		54.6656919279258/-5.6672813210398	GB	Thu Oct 01 2020	Oct	2020	Oct-2020	plastic	butt	cigarette	smoking
8614009		54.6659838315609/-5.66715745255879	GB	Thu Oct 01 2020	Oct	2020	Oct-2020	plastic	piece	bottlering
8614007		54.665988148241/-5.66764653660885	GB	Thu Oct 01 2020	Oct	2020	Oct-2020	plastic	sweet	wrapper	twirl	cadburys	mondelezinternational
8614006		54.6659371443602/-5.66753505729667	GB	Thu Oct 01 2020	Oct	2020	Oct-2020	plastic	piece
8614005		54.6660095220941/-5.66734839231304	GB	Thu Oct 01 2020	Oct	2020	Oct-2020	plastic	lightweight	glove
8614004		54.6659284271809/-5.66749197431437	GB	Thu Oct 01 2020	Oct	2020	Oct-2020	plastic	bottlecap	drink	water	deepriverrock	cocacolacompany
8614001		54.6659090649846/-5.66752868705026	GB	Thu Oct 01 2020	Oct	2020	Oct-2020	can	metal	piece
8614000		54.665869292854/-5.6677005998843	GB	Thu Oct 01 2020	Oct	2020	Oct-2020	plastic	polystyrene	piece	styrofoam
8613998		54.6664113136171/-5.66418405258171	GB	Thu Oct 01 2020	Oct	2020	Oct-2020	plastic	polystyrene	piece	styrofoam
8613997		54.6656320353801/-5.66720398325473	GB	Thu Oct 01 2020	Oct	2020	Oct-2020	plastic	bag	dogpoo
8613996		54.6664101209622/-5.66389292147361	GB	Thu Oct 01 2020	Oct	2020	Oct-2020	plastic	polystyrene	styrofoam	food	container
8613994		54.6681611985477/-5.66117403097978	GB	Thu Oct 01 2020	Oct	2020	Oct-2020	plastic	straw	drink
8613993		54.6680775471541/-5.66138835624388	GB	Thu Oct 01 2020	Oct	2020	Oct-2020	plastic	packet	snack	mccoys	intersnack	kpsnacks
8613991		54.6681112424048/-5.66116481088629	GB	Thu Oct 01 2020	Oct	2020	Oct-2020	plastic	sweet	wrapper	milkyway	marsincorporated
8613989		54.6681674011561/-5.66116807982853	GB	Thu Oct 01 2020	Oct	2020	Oct-2020	plastic	piece
8613988		54.6681686584416/-5.66117000766626	GB	Thu Oct 01 2020	Oct	2020	Oct-2020	plastic	bottlecap	drink
8613987		54.6681035310539/-5.6611938960903	GB	Thu Oct 01 2020	Oct	2020	Oct-2020	plastic	bottlecap	drink	energydrink	bpm	cocacolacompany
8613986		54.6681364300239/-5.66119079478612	GB	Thu Oct 01 2020	Oct	2020	Oct-2020	plastic	balloon	piece
8613985		54.6681530681017/-5.66114570014706	GB	Thu Oct 01 2020	Oct	2020	Oct-2020	plastic	rope	piece
8613984		54.6681255335497/-5.66113187000683	GB	Thu Oct 01 2020	Oct	2020	Oct-2020	plastic	rope	piece
8613983		54.6680691968994/-5.66139451767628	GB	Thu Oct 01 2020	Oct	2020	Oct-2020	plastic	bottlering	notcut
8613981		54.6681086859244/-5.66113740206292	GB	Thu Oct 01 2020	Oct	2020	Oct-2020	plastic	bottle	drink	cocacola	ccrf	cocacolacompany
8613979		54.6681323228913/-5.66111544147661	GB	Thu Oct 01 2020	Oct	2020	Oct-2020	plastic	tub	icecream	sweet	nugelato
8613973		54.6681739390405/-5.66125776619246	GB	Thu Oct 01 2020	Oct	2020	Oct-2020	plastic	cottonbud	stick	piece
8613967		54.6681402856993/-5.66116338596275	GB	Thu Oct 01 2020	Oct	2020	Oct-2020	plastic	polystyrene	piece	styrofoam
8613964		54.6681307303297/-5.66115726717344	GB	Thu Oct 01 2020	Oct	2020	Oct-2020	plastic	wrapper	sweet	mars	marsincorporated	piece
8613963		54.6681373101237/-5.6611817423307	GB	Thu Oct 01 2020	Oct	2020	Oct-2020	plastic	straw	drink
8613961		54.6681488771501/-5.66120093688896	GB	Thu Oct 01 2020	Oct	2020	Oct-2020	plastic	polystyrene	piece	styrofoam
8613959		54.6681035310539/-5.66130001098445	GB	Thu Oct 01 2020	Oct	2020	Oct-2020	plastic	cup	drink
8613958		54.6680605318906/-5.66132909618845	GB	Thu Oct 01 2020	Oct	2020	Oct-2020	plastic	cup	drink
8613956		54.6681566304105/-5.66119758412769	GB	Thu Oct 01 2020	Oct	2020	Oct-2020	plastic	fourpackring
8613952		54.6680795588108/-5.66121811979046	GB	Thu Oct 01 2020	Oct	2020	Oct-2020	plastic	bottlecap	drink
8613950		54.6681075962769/-5.66114201210966	GB	Thu Oct 01 2020	Oct	2020	Oct-2020	plastic	packet	snack	tesco
8613945		54.6681889845567/-5.66114100628128	GB	Thu Oct 01 2020	Oct	2020	Oct-2020	plastic	biofilter
8613944		54.6681705443698/-5.66113480367294	GB	Thu Oct 01 2020	Oct	2020	Oct-2020	plastic	sweet	wrapper	crunchie	cadburys	mondelezinternational
8613942		54.6681789262729/-5.66118090414038	GB	Thu Oct 01 2020	Oct	2020	Oct-2020	plastic	bottle	drink
8613941		54.6681786329063/-5.66115785390666	GB	Thu Oct 01 2020	Oct	2020	Oct-2020	plastic	bottlecap	drink
8613940		54.6681749029594/-5.6611762102746	GB	Thu Oct 01 2020	Oct	2020	Oct-2020	plastic	straw	drink
8613939		54.6681091888385/-5.66119607538512	GB	Thu Oct 01 2020	Oct	2020	Oct-2020	plastic	pot	sauce	food	mcdonalds
8613933		54.6681735618549/-5.66136077978244	GB	Thu Oct 01 2020	Oct	2020	Oct-2020	plastic	straw	drink
8613932		54.6685929497902/-5.66030836518856	GB	Thu Oct 01 2020	Oct	2020	Oct-2020	plastic	wrapper	sweet	kitkat	nestle
8613931		54.6687727841126/-5.66038403660586	GB	Thu Oct 01 2020	Oct	2020	Oct-2020	plastic	carrierbag	tesco
8613930		54.6688627219337/-5.66012687981656	GB	Thu Oct 01 2020	Oct	2020	Oct-2020	plastic	cottonbud	stick
8613929		54.6685681175313/-5.66019405913405	GB	Thu Oct 01 2020	Oct	2020	Oct-2020	plastic	cottonbud	stick
8613928		54.6688943217086/-5.66021966748467	GB	Thu Oct 01 2020	Oct	2020	Oct-2020	plastic	cottonbud	stick
8613927		54.6688824613156/-5.66012780182591	GB	Thu Oct 01 2020	Oct	2020	Oct-2020	plastic	cottonbud	stick
8613926		54.668863643943/-5.66017147154143	GB	Thu Oct 01 2020	Oct	2020	Oct-2020	plastic	cottonbud	stick
8613925		54.6688598720866/-5.66014498472741	GB	Thu Oct 01 2020	Oct	2020	Oct-2020	plastic	cottonbud	stick
8613924		54.6691970341417/-5.65949136391809	GB	Thu Oct 01 2020	Oct	2020	Oct-2020	plastic	bottlecap	drink
8613923		54.6688769711691/-5.66009511240354	GB	Thu Oct 01 2020	Oct	2020	Oct-2020	plastic	cottonbud	stick
8613921		54.6687095286925/-5.66012043866788	GB	Thu Oct 01 2020	Oct	2020	Oct-2020	plastic	lighter
8613919		54.6691907058048/-5.65942296758821	GB	Thu Oct 01 2020	Oct	2020	Oct-2020	plastic	bottlering	notcut
8613915		54.6691701282325/-5.65937066451242	GB	Thu Oct 01 2020	Oct	2020	Oct-2020	plastic	wrapper	sweet	bounty	marsincorporated
8613914		54.6691897418859/-5.65940184519222	GB	Thu Oct 01 2020	Oct	2020	Oct-2020	plastic	biofilter
8613913		54.6692143846812/-5.65940871835282	GB	Thu Oct 01 2020	Oct	2020	Oct-2020	plastic	bottle	drink	milk	spar
8613912		54.6692134207624/-5.65940218046835	GB	Thu Oct 01 2020	Oct	2020	Oct-2020	plastic	nozzle
8613911		54.669174067727/-5.65940746106734	GB	Thu Oct 01 2020	Oct	2020	Oct-2020	plastic	bottlecap	drink
8613910		54.6691985009747/-5.65935323015382	GB	Thu Oct 01 2020	Oct	2020	Oct-2020	plastic	bottle	drink	energydrink	lucozadeenergy	suntory
8613908		54.6691956092181/-5.65941911191275	GB	Thu Oct 01 2020	Oct	2020	Oct-2020	plastic	bottlecap	drink
8613905		54.6692359261724/-5.65935499035349	GB	Thu Oct 01 2020	Oct	2020	Oct-2020	plastic	securityseal
8613904		54.6691780910405/-5.65933789127102	GB	Thu Oct 01 2020	Oct	2020	Oct-2020	plastic	cottonbud	stick	piece
8613903		54.6692039073023/-5.65933562815716	GB	Thu Oct 01 2020	Oct	2020	Oct-2020	plastic	cottonbud	stick
8613902		54.66923093894/-5.6593581754767	GB	Thu Oct 01 2020	Oct	2020	Oct-2020	plastic	cigarette	butt	smoking
8613901		54.6692180727186/-5.65935624763897	GB	Thu Oct 01 2020	Oct	2020	Oct-2020	plastic	polystyrene	styrofoam	piece	container	food
8613900		54.669215013324/-5.65935230814448	GB	Thu Oct 01 2020	Oct	2020	Oct-2020	plastic	cottonbud	stick
8613899		54.6693158057096/-5.65918232314816	GB	Thu Oct 01 2020	Oct	2020	Oct-2020	plastic	bottlecap	drink
8613898		54.6692378540101/-5.65936923958888	GB	Thu Oct 01 2020	Oct	2020	Oct-2020	plastic	piece
8613897		54.6693454776468/-5.65921266563764	GB	Thu Oct 01 2020	Oct	2020	Oct-2020	plastic	bottle	drink	ribena	suntory
8613896		54.6693337010729/-5.65919615328839	GB	Thu Oct 01 2020	Oct	2020	Oct-2020	plastic	piece	polystyrene
8613895		54.66928374493/-5.6592247355782	GB	Thu Oct 01 2020	Oct	2020	Oct-2020	plastic	cottonbud	stick	piece
8613894		54.6693068370732/-5.65917184576919	GB	Thu Oct 01 2020	Oct	2020	Oct-2020	plastic	piece
8613892		54.6696948772805/-5.65826157108476	GB	Thu Oct 01 2020	Oct	2020	Oct-2020	polystyrene	piece	plastic	styrofoam
8613891		54.6696681809189/-5.65829015337458	GB	Thu Oct 01 2020	Oct	2020	Oct-2020	polystyrene	piece	plastic	styrofoam
8613890		54.6694771154361/-5.65900948830476	GB	Thu Oct 01 2020	Oct	2020	Oct-2020	plastic	bottle	drink
8613889		54.6696699830281/-5.65827967599561	GB	Thu Oct 01 2020	Oct	2020	Oct-2020	plastic	bottlecap	drink	fanta	cocacolacompany
8613888		54.6693251515316/-5.6591504719161	GB	Thu Oct 01 2020	Oct	2020	Oct-2020	plastic	piece
8613887		54.6697101323443/-5.65835226327708	GB	Thu Oct 01 2020	Oct	2020	Oct-2020	polystyrene	piece	plastic
8613886		54.6697794506835/-5.65817783587208	GB	Thu Oct 01 2020	Oct	2020	Oct-2020	plastic	cottonbud	stick
8613885		54.6698106313633/-5.65814187750747	GB	Thu Oct 01 2020	Oct	2020	Oct-2020	plastic	cottonbud	stick
8613884		54.6697562328118/-5.65825117752483	GB	Thu Oct 01 2020	Oct	2020	Oct-2020	plastic	piece	ball	dog
8613883		54.6697759302842/-5.65818035044303	GB	Thu Oct 01 2020	Oct	2020	Oct-2020	plastic	cottonbud	stick
8613882		54.6698089549827/-5.65817230381599	GB	Thu Oct 01 2020	Oct	2020	Oct-2020	plastic	lid	drink
8613881		54.6698106313633/-5.65814187750747	GB	Thu Oct 01 2020	Oct	2020	Oct-2020	polystyrene	piece	plastic	styrofoam
8613880		54.6697519580411/-5.65819141455522	GB	Thu Oct 01 2020	Oct	2020	Oct-2020	plastic	cottonbud	stick
8613879		54.6697748825463/-5.65818395466139	GB	Thu Oct 01 2020	Oct	2020	Oct-2020	plastic	piece
8613878		54.669743659957/-5.65817548893919	GB	Thu Oct 01 2020	Oct	2020	Oct-2020	plastic	cottonbud	stick
8613877		54.6697682608428/-5.65818479285171	GB	Thu Oct 01 2020	Oct	2020	Oct-2020	plastic	cottonbud	stick
8613876		54.6697492339226/-5.65817599185338	GB	Thu Oct 01 2020	Oct	2020	Oct-2020	plastic	piece
8613875		54.6697677998381/-5.65817783587208	GB	Thu Oct 01 2020	Oct	2020	Oct-2020	plastic	cottonbud	stick
8613874		54.6697519580411/-5.65819141455522	GB	Thu Oct 01 2020	Oct	2020	Oct-2020	plastic	cottonbud	stick
8613873		54.6697597532111/-5.65817900933852	GB	Thu Oct 01 2020	Oct	2020	Oct-2020	plastic	lid	drink
8613872		54.669750239751/-5.65818018280497	GB	Thu Oct 01 2020	Oct	2020	Oct-2020	plastic	cottonbud	stick
8613871		54.6698120562869/-5.65818864852717	GB	Thu Oct 01 2020	Oct	2020	Oct-2020	plastic	cottonbud	stick
8613870		54.669730332731/-5.65816316754153	GB	Thu Oct 01 2020	Oct	2020	Oct-2020	plastic	piece
8613869		54.6697855275633/-5.65815654583802	GB	Thu Oct 01 2020	Oct	2020	Oct-2020	plastic	piece
8613868		54.6697786124932/-5.65818328410914	GB	Thu Oct 01 2020	Oct	2020	Oct-2020	plastic	bottlecap
8613867		54.669767380743/-5.65821052529445	GB	Thu Oct 01 2020	Oct	2020	Oct-2020	plastic	piece
8613866		54.6697756369176/-5.65825419500997	GB	Thu Oct 01 2020	Oct	2020	Oct-2020	plastic	lollipop	stick	sweet
8613865		54.6697560651737/-5.65819485113552	GB	Thu Oct 01 2020	Oct	2020	Oct-2020	plastic	piece
8613864		54.6697978070515/-5.65821077675154	GB	Thu Oct 01 2020	Oct	2020	Oct-2020	plastic	piece
8613863		54.6697713202375/-5.65824405290713	GB	Thu Oct 01 2020	Oct	2020	Oct-2020	plastic	piece
8613861		54.6697784867647/-5.65821672790279	GB	Thu Oct 01 2020	Oct	2020	Oct-2020	plastic	biofilter
8613860		54.669822952761/-5.65825880505672	GB	Thu Oct 01 2020	Oct	2020	Oct-2020	plastic	lollipop	stick	sweet
8613859		54.6698412672194/-5.6581871397846	GB	Thu Oct 01 2020	Oct	2020	Oct-2020	plastic	piece
8613856		54.6698300773787/-5.65821580589345	GB	Thu Oct 01 2020	Oct	2020	Oct-2020	plastic	sweet	wrapper	cadburys	mondelezinternational	piece
8613855		54.6697886288675/-5.65822636709144	GB	Thu Oct 01 2020	Oct	2020	Oct-2020	plastic	bottlecap	drink
8613853		54.665981484628/-5.66730447114042	GB	Thu Oct 01 2020	Oct	2020	Oct-2020	plastic	cottonbud	stick
8613851		54.6697456716138/-5.65827422775855	GB	Thu Oct 01 2020	Oct	2020	Oct-2020	plastic	biofilter
8613850		54.6697461326184/-5.65812109038761	GB	Thu Oct 01 2020	Oct	2020	Oct-2020	plastic	wrapper	sweet	milkybar	nestle	piece
8613849		54.6698238747704/-5.65775773488512	GB	Thu Oct 01 2020	Oct	2020	Oct-2020	plastic	cap
8613848		54.6698107990014/-5.65788245760431	GB	Thu Oct 01 2020	Oct	2020	Oct-2020	plastic	sweet	wrapper	mars	marsincorporated
8613847		54.6697998187082/-5.6583457253926	GB	Thu Oct 01 2020	Oct	2020	Oct-2020	plastic	wrapper	sweet	piece	milkyway	marsincorporated
8613842		54.670113720982/-5.65687134862473	GB	Thu Oct 01 2020	Oct	2020	Oct-2020	plastic	cup	drink
8613839		54.6698116371917/-5.65771674737861	GB	Thu Oct 01 2020	Oct	2020	Oct-2020	plastic	spoon	cutlery	sweet
8613838		54.6700981306421/-5.6568691693299	GB	Thu Oct 01 2020	Oct	2020	Oct-2020	plastic	bottlecap	drink
8613836		54.6701515323316/-5.65692469199811	GB	Thu Oct 01 2020	Oct	2020	Oct-2020	plastic	bottle	drink	water	deepriverrock	cocacolacompany	ccrf
8613833		54.6701733582231/-5.65688040108015	GB	Thu Oct 01 2020	Oct	2020	Oct-2020	plastic	bottle	drink
8613832		54.6702608652922/-5.65660312772324	GB	Thu Oct 01 2020	Oct	2020	Oct-2020	plastic	cigarette	butt	smoking
8613829		54.6703557903456/-5.65673111938467	GB	Thu Oct 01 2020	Oct	2020	Oct-2020	plastic	sweet	wrapper	lollipop	perfettivanmelle	chupachups
8613828		54.6707173856484/-5.65596845001509	GB	Thu Oct 01 2020	Oct	2020	Oct-2020	plastic	styrofoam	polystyrene	food	container
8613827		54.664839569068/-5.6531138747896	GB	Thu Oct 01 2020	Oct	2020	Oct-2020	plastic	bottle	drink
8613825		54.6648016898471/-5.65271082334747	GB	Thu Oct 01 2020	Oct	2020	Oct-2020	plastic	dog	bag
8613824		54.670721492781/-5.65597783774664	GB	Thu Oct 01 2020	Oct	2020	Oct-2020	plastic	polystyrene	styrofoam	piece	container	food
8613823		54.6706872946161/-5.6549782119744	GB	Thu Oct 01 2020	Oct	2020	Oct-2020	plastic	cigarette	butt	smoking
8613822		54.6707261028277/-5.65523411147823	GB	Thu Oct 01 2020	Oct	2020	Oct-2020	plastic	cutlery	spoon	sweet
8613821		54.6687435866218/-5.65409111961308	GB	Thu Oct 01 2020	Oct	2020	Oct-2020	plastic	piece	polystyrene	styrofoam
8613818		54.6690194887952/-5.65577198994453	GB	Thu Oct 01 2020	Oct	2020	Oct-2020	plastic	wetwipe
8613817		54.6694610640916/-5.6537141371571	GB	Thu Oct 01 2020	Oct	2020	Oct-2020	plastic	cigarette	butt	smoking
8613816		54.6695106430488/-5.65370248631169	GB	Thu Oct 01 2020	Oct	2020	Oct-2020	plastic	cigarette	butt	smoking
8613815		54.6693194518375/-5.65362394787898	GB	Thu Oct 01 2020	Oct	2020	Oct-2020	plastic	cigarette	butt	smoking
8610435		55.0773579/-3.6250705	GB	Thu Oct 01 2020	Oct	2020	Oct-2020	paper	wrapper
8610434		55.0773579/-3.6250705	GB	Thu Oct 01 2020	Oct	2020	Oct-2020	paper	wrapper
8610433		55.0773579/-3.6250705	GB	Thu Oct 01 2020	Oct	2020	Oct-2020	plastic	tub
8610432		55.0773579/-3.6250705	GB	Thu Oct 01 2020	Oct	2020	Oct-2020	paper	wrapper	mcdonald	s
8610431		55.0773579/-3.6250705	GB	Thu Oct 01 2020	Oct	2020	Oct-2020	aluminum	can	irn	bru
8610430		55.0773579/-3.6250705	GB	Thu Oct 01 2020	Oct	2020	Oct-2020	mcdonalds	paper	wrapper
8610429		55.0773579/-3.6250705	GB	Thu Oct 01 2020	Oct	2020	Oct-2020	foil	bag
8610427		55.0773579/-3.6250705	GB	Thu Oct 01 2020	Oct	2020	Oct-2020	latexglove
8610426		55.0773579/-3.6250705	GB	Thu Oct 01 2020	Oct	2020	Oct-2020	metalfoil
8610425		55.0773579/-3.6250705	GB	Thu Oct 01 2020	Oct	2020	Oct-2020	bottle	plastic
8610424		55.0773579/-3.6250705	GB	Thu Oct 01 2020	Oct	2020	Oct-2020	singleusefacemask
8610423		55.0773579/-3.6250705	GB	Thu Oct 01 2020	Oct	2020	Oct-2020	foil	bag
8610422		55.0773579/-3.6250705	GB	Thu Oct 01 2020	Oct	2020	Oct-2020	plastic	wrapper
8610421		55.0773579/-3.6250705	GB	Thu Oct 01 2020	Oct	2020	Oct-2020	paper
8610420		55.0773579/-3.6250705	GB	Thu Oct 01 2020	Oct	2020	Oct-2020	plasticbottle	water
8610419		55.0773579/-3.6250705	GB	Thu Oct 01 2020	Oct	2020	Oct-2020	plastic
8610418		55.0773579/-3.6250705	GB	Thu Oct 01 2020	Oct	2020	Oct-2020	styrofoam	food
8610417		55.0773579/-3.6250705	GB	Thu Oct 01 2020	Oct	2020	Oct-2020	plasticbottle	water
8610416		55.0773579/-3.6250705	GB	Thu Oct 01 2020	Oct	2020	Oct-2020	plastic
8610415		55.0773579/-3.6250705	GB	Thu Oct 01 2020	Oct	2020	Oct-2020	wrapper
8610414		55.0773579/-3.6250705	GB	Thu Oct 01 2020	Oct	2020	Oct-2020	aluminum	can	irnbru
8610413		55.0773579/-3.6250705	GB	Thu Oct 01 2020	Oct	2020	Oct-2020	plasticwrapper
8610412		55.0773579/-3.6250705	GB	Thu Oct 01 2020	Oct	2020	Oct-2020	plastic	piece
8610411		55.0773579/-3.6250705	GB	Thu Oct 01 2020	Oct	2020	Oct-2020	paper
8610410		55.0773579/-3.6250705	GB	Thu Oct 01 2020	Oct	2020	Oct-2020	styrofoamcup
8610409		55.0773579/-3.6250705	GB	Thu Oct 01 2020	Oct	2020	Oct-2020	paper
8610408		55.0773579/-3.6250705	GB	Thu Oct 01 2020	Oct	2020	Oct-2020	candywrapper
8610407		55.0773579/-3.6250705	GB	Thu Oct 01 2020	Oct	2020	Oct-2020	plastic
8610406		55.0773579/-3.6250705	GB	Thu Oct 01 2020	Oct	2020	Oct-2020	plasticbottle
8610405		55.0773579/-3.6250705	GB	Thu Oct 01 2020	Oct	2020	Oct-2020	plastic	piece
8610404		55.0773579/-3.6250705	GB	Thu Oct 01 2020	Oct	2020	Oct-2020	plastic
8610403		55.0773579/-3.6250705	GB	Thu Oct 01 2020	Oct	2020	Oct-2020	paper
8610402		55.0773579/-3.6250705	GB	Thu Oct 01 2020	Oct	2020	Oct-2020	plastic	wrapper
8610401		55.0773579/-3.6250705	GB	Thu Oct 01 2020	Oct	2020	Oct-2020	cup	paper
8610400		55.0773579/-3.6250705	GB	Thu Oct 01 2020	Oct	2020	Oct-2020	plastic
8610399		55.0773579/-3.6250705	GB	Thu Oct 01 2020	Oct	2020	Oct-2020	papercup
8610398		55.0773579/-3.6250705	GB	Thu Oct 01 2020	Oct	2020	Oct-2020	plastic
8610396		55.0773579/-3.6250705	GB	Thu Oct 01 2020	Oct	2020	Oct-2020	paper	piece
8610395		55.0773579/-3.6250705	GB	Thu Oct 01 2020	Oct	2020	Oct-2020	paper	cigarette
8610394		55.0773579/-3.6250705	GB	Thu Oct 01 2020	Oct	2020	Oct-2020	plastic	wrapper
8610393		55.0773579/-3.6250705	GB	Thu Oct 01 2020	Oct	2020	Oct-2020	plastic	wrapper
8610391		55.0773579/-3.6250705	GB	Thu Oct 01 2020	Oct	2020	Oct-2020	cardboard
8610389		55.0773579/-3.6250705	GB	Thu Oct 01 2020	Oct	2020	Oct-2020	plastic
8610388		55.0773579/-3.6250705	GB	Thu Oct 01 2020	Oct	2020	Oct-2020	plastic	wrapper
8610386		55.0773579/-3.6250705	GB	Thu Oct 01 2020	Oct	2020	Oct-2020	cigarette
8610385		55.0773579/-3.6250705	GB	Thu Oct 01 2020	Oct	2020	Oct-2020	plastic
8610382		55.0773579/-3.6250705	GB	Thu Oct 01 2020	Oct	2020	Oct-2020	bottle	plastic
8605209		51.8130485/-0.2927265	GB	Thu Oct 01 2020	Oct	2020	Oct-2020	plasticbottle	plasticwrapper	face mask
8604297		51.4036168420542/-0.95725505671454	GB	Thu Oct 01 2020	Oct	2020	Oct-2020	crisppacket	bag	aldi
8604155		51.4043504058738/-0.963863529634088	GB	Thu Oct 01 2020	Oct	2020	Oct-2020	kirkland	bottle	plastic
8604147		51.4039321125302/-0.964433257360688	GB	Thu Oct 01 2020	Oct	2020	Oct-2020	honestcrust	sandwichwrapper	paper
8604074		52.0075790698128/-0.697884269668578	GB	Thu Oct 01 2020	Oct	2020	Oct-2020	lucazade	plastic	bottle
8604043		52.0083146926823/-0.695272125922543	GB	Thu Oct 01 2020	Oct	2020	Oct-2020	can	budweiser
8604040		52.0083053672946/-0.69498448944266	GB	Thu Oct 01 2020	Oct	2020	Oct-2020	plastic	waterbottle
8604036		52.0083146926823/-0.695272125922543	GB	Thu Oct 01 2020	Oct	2020	Oct-2020	bottle	plastic
8603881		52.0079491642163/-0.694231007176028	GB	Thu Oct 01 2020	Oct	2020	Oct-2020	paper	cup
8603879		52.0087472182898/-0.689909147733937	GB	Thu Oct 01 2020	Oct	2020	Oct-2020	can	dr pepper
8603873		52.0081649926636/-0.69515958172611	GB	Thu Oct 01 2020	Oct	2020	Oct-2020	cocacola	bottle
8603871		52.0087342862282/-0.690105981846381	GB	Thu Oct 01 2020	Oct	2020	Oct-2020	can	pepsi
8603868		52.0085895037144/-0.690300399188387	GB	Thu Oct 01 2020	Oct	2020	Oct-2020	fanta	can
8603711		51.4070205144086/-0.955626084571076	GB	Thu Oct 01 2020	Oct	2020	Oct-2020	plastic	plasticbag
8603710		51.4073273948561/-0.954986509888269	GB	Thu Oct 01 2020	Oct	2020	Oct-2020	aluminum	can	energy drink
8603295		52.0100982847741/-0.687249049163428	GB	Thu Oct 01 2020	Oct	2020	Oct-2020	cup	polystyrene
8603292		52.0102466193772/-0.687305369812074	GB	Thu Oct 01 2020	Oct	2020	Oct-2020	fork	plastic
8591132		51.8102851455353/-0.296525618930617	GB	Thu Oct 01 2020	Oct	2020	Oct-2020	plastic	lid
8591131		51.8084505586424/-0.299357899107338	GB	Thu Oct 01 2020	Oct	2020	Oct-2020	plastic
8591130		51.8058777329364/-0.297394785187252	GB	Thu Oct 01 2020	Oct	2020	Oct-2020	wrapper
8591129		51.8057674047275/-0.297601330244561	GB	Thu Oct 01 2020	Oct	2020	Oct-2020	plastic
8591128		51.8061062973475/-0.298983994871656	GB	Thu Oct 01 2020	Oct	2020	Oct-2020	cigarettepack
8591127		51.8063211255258/-0.299193710089008	GB	Thu Oct 01 2020	Oct	2020	Oct-2020	wrapper
8591126		51.8057792374544/-0.297592222324161	GB	Thu Oct 01 2020	Oct	2020	Oct-2020	plastic
8591125		51.8039753241947/-0.296495407820024	GB	Thu Oct 01 2020	Oct	2020	Oct-2020	wrapper
8591124		51.8042305950558/-0.296626249328532	GB	Thu Oct 01 2020	Oct	2020	Oct-2020	wrapper
8591123		51.8013359070023/-0.295495617322558	GB	Thu Oct 01 2020	Oct	2020	Oct-2020	wrapper	crisppacket
8591122		51.8042743485903/-0.296558188274779	GB	Thu Oct 01 2020	Oct	2020	Oct-2020	wrapper
8591121		51.8003083253762/-0.29695448465673	GB	Thu Oct 01 2020	Oct	2020	Oct-2020	bottle	glass	stellaartois
8591119		51.7971392954251/-0.295910099521555	GB	Thu Oct 01 2020	Oct	2020	Oct-2020	plastic
8591118		51.7952993000409/-0.287751657888561	GB	Thu Oct 01 2020	Oct	2020	Oct-2020	tissue
8591117		51.794948098298/-0.281848786399031	GB	Thu Oct 01 2020	Oct	2020	Oct-2020	plastic	bottlecap
8591116		51.7941844362912/-0.283402066804198	GB	Thu Oct 01 2020	Oct	2020	Oct-2020	metal	can
8591115		51.7940370012217/-0.28358546732475	GB	Thu Oct 01 2020	Oct	2020	Oct-2020	wrapper
8591114		51.7969381112517/-0.279257395078761	GB	Thu Oct 01 2020	Oct	2020	Oct-2020	plastic
8591113		51.7984336074812/-0.277962329220757	GB	Thu Oct 01 2020	Oct	2020	Oct-2020	wrapper
8591112		51.7976613622641/-0.278901038691661	GB	Thu Oct 01 2020	Oct	2020	Oct-2020	wrapper
8591111		51.8003384164086/-0.283737313002612	GB	Thu Oct 01 2020	Oct	2020	Oct-2020	wrapper	plastic
8591110		51.7976798024511/-0.278526535257957	GB	Thu Oct 01 2020	Oct	2020	Oct-2020	wrapper
8591109		51.8023234901805/-0.286432229260097	GB	Thu Oct 01 2020	Oct	2020	Oct-2020	plastic
8591108		51.802087004187/-0.286140431655858	GB	Thu Oct 01 2020	Oct	2020	Oct-2020	wrapper
8591107		51.800522063907/-0.284075103700426	GB	Thu Oct 01 2020	Oct	2020	Oct-2020	plastic
8591106		51.8030929193383/-0.287190489471226	GB	Thu Oct 01 2020	Oct	2020	Oct-2020	plastic
8591105		51.8060439073909/-0.286373569573123	GB	Thu Oct 01 2020	Oct	2020	Oct-2020	plastic
8591104		51.8028597347921/-0.287103736773401	GB	Thu Oct 01 2020	Oct	2020	Oct-2020	wrapper
8591103		51.8033744674658/-0.286741387099295	GB	Thu Oct 01 2020	Oct	2020	Oct-2020	plastic
8591102		51.8043781165516/-0.285797333345083	GB	Thu Oct 01 2020	Oct	2020	Oct-2020	plastic
8591101		51.8068968365451/-0.285589629784492	GB	Thu Oct 01 2020	Oct	2020	Oct-2020	can
8591100		51.8071075995004/-0.285499021411208	GB	Thu Oct 01 2020	Oct	2020	Oct-2020	dogpoobag
8591099		51.8070390355324/-0.285659618675975	GB	Thu Oct 01 2020	Oct	2020	Oct-2020	wrapper
8591098		51.8089835306955/-0.286153669926268	GB	Thu Oct 01 2020	Oct	2020	Oct-2020	wipe
8591097		51.809013805305/-0.286909524855812	GB	Thu Oct 01 2020	Oct	2020	Oct-2020	papertowel
8591096		51.8086938285911/-0.284926383544424	GB	Thu Oct 01 2020	Oct	2020	Oct-2020	plastic
8591095		51.8090066553094/-0.286813530375173	GB	Thu Oct 01 2020	Oct	2020	Oct-2020	sock
8591094		51.8101088656595/-0.287368269637495	GB	Thu Oct 01 2020	Oct	2020	Oct-2020	can	carlsberg
8591093		51.8101344304642/-0.287721734494239	GB	Thu Oct 01 2020	Oct	2020	Oct-2020	stick
8591092		51.8101242464518/-0.287381848320633	GB	Thu Oct 01 2020	Oct	2020	Oct-2020	stick
8591091		51.8103325786552/-0.289364252239735	GB	Thu Oct 01 2020	Oct	2020	Oct-2020	disposableglove
8591090		51.8101522724768/-0.288353109077505	GB	Thu Oct 01 2020	Oct	2020	Oct-2020	plastic	lid
8591089		51.8102916359124/-0.288806781271681	GB	Thu Oct 01 2020	Oct	2020	Oct-2020	plastic
8591088		51.8103738595283/-0.289453351870449	GB	Thu Oct 01 2020	Oct	2020	Oct-2020	wrapper
8591087		51.8104052916652/-0.289564160630377	GB	Thu Oct 01 2020	Oct	2020	Oct-2020	wetwipe
8591086		51.8104241509473/-0.289630042389305	GB	Thu Oct 01 2020	Oct	2020	Oct-2020	facemask
8591085		51.8105790066084/-0.289980573579939	GB	Thu Oct 01 2020	Oct	2020	Oct-2020	plastic
8591084		51.8108418211823/-0.290441662073406	GB	Thu Oct 01 2020	Oct	2020	Oct-2020	papercup	costa
8591083		51.8105622008925/-0.289933970198305	GB	Thu Oct 01 2020	Oct	2020	Oct-2020	can
8591082		51.8106698664388/-0.290154414251717	GB	Thu Oct 01 2020	Oct	2020	Oct-2020	plastic	lid
8591081		51.8108573277032/-0.290644839406284	GB	Thu Oct 01 2020	Oct	2020	Oct-2020	wrapper
8591080		51.8113619601837/-0.293638017028844	GB	Thu Oct 01 2020	Oct	2020	Oct-2020	plastic
8591079		51.8107763145433/-0.290100105993377	GB	Thu Oct 01 2020	Oct	2020	Oct-2020	wrapper
8591078		51.8108551484084/-0.290730334818634	GB	Thu Oct 01 2020	Oct	2020	Oct-2020	wrapper
8591076		51.8116526864952/-0.293659390881931	GB	Thu Oct 01 2020	Oct	2020	Oct-2020	papercup
8591074		51.8108658353349/-0.290761264041337	GB	Thu Oct 01 2020	Oct	2020	Oct-2020	cigarette	butt
8591073		51.811036936061/-0.290811212171089	GB	Thu Oct 01 2020	Oct	2020	Oct-2020	plastic
8591072		51.8111317751871/-0.291548511707428	GB	Thu Oct 01 2020	Oct	2020	Oct-2020	can	redbull
8591071		51.8116455345637/-0.292547291155277	GB	Thu Oct 01 2020	Oct	2020	Oct-2020	wrapper
8591069		51.8115810939749/-0.293783075041366	GB	Thu Oct 01 2020	Oct	2020	Oct-2020	plastic	lid
8591060		53.7939793850968/-1.55777743712661	GB	Thu Oct 01 2020	Oct	2020	Oct-2020	ppe	facemask	plastic
8589329		51.9925618389061/-0.800038733252564	GB	Thu Oct 01 2020	Oct	2020	Oct-2020	alcohol	glass	smirnoff
8589328		51.9895581799321/-0.803185251013155	GB	Thu Oct 01 2020	Oct	2020	Oct-2020	plastic	bottle
8589247		51.9896059918154/-0.80324854366864	GB	Thu Oct 01 2020	Oct	2020	Oct-2020	bicycle part
8588851		51.9920125303227/-0.803425473567072	GB	Thu Oct 01 2020	Oct	2020	Oct-2020	can	redbull	energydrink
8588850		51.9922175026107/-0.803567254043259	GB	Thu Oct 01 2020	Oct	2020	Oct-2020	wrapper	rowntrees
8588834		51.9929877727226/-0.804630015834975	GB	Thu Oct 01 2020	Oct	2020	Oct-2020	plastic	bottle
8588833		51.9929558182687/-0.803680601012248	GB	Thu Oct 01 2020	Oct	2020	Oct-2020	plastic	spout
8588832		51.9934339164514/-0.803478825493327	GB	Thu Oct 01 2020	Oct	2020	Oct-2020	plastic	bottle
8588829		51.9936941233372/-0.80355071679836	GB	Thu Oct 01 2020	Oct	2020	Oct-2020	bottle	drink	plastic
8588621		51.9935239877619/-0.803539039736253	GB	Thu Oct 01 2020	Oct	2020	Oct-2020	facemask
8588613		51.9941670560347/-0.803289845982748	GB	Thu Oct 01 2020	Oct	2020	Oct-2020	cigarettepack
8588606		51.9934175705024/-0.802587176298596	GB	Thu Oct 01 2020	Oct	2020	Oct-2020	plastic	spout
8588593		51.4079266347439/-0.953291820932495	GB	Thu Oct 01 2020	Oct	2020	Oct-2020	can	fosters can	aluminium
8588574		51.9915529282861/-0.801339383031979	GB	Thu Oct 01 2020	Oct	2020	Oct-2020	lucazade	bottle	plastic
8588457		51.9912999089762/-0.798882831675005	GB	Thu Oct 01 2020	Oct	2020	Oct-2020	hairband
8588448		51.9925526721848/-0.799587610761981	GB	Thu Oct 01 2020	Oct	2020	Oct-2020	plasticbottle
8560790		51.7412278538543/-3.34001747183021	GB	Wed Sep 30 2020	Sep	2020	Sep-2020	keyfob	plastic
8560785		51.74115011841/-3.34008946954913	GB	Wed Sep 30 2020	Sep	2020	Sep-2020	butt	cigarette
8560744		51.7410972644669/-3.3400994544021	GB	Wed Sep 30 2020	Sep	2020	Sep-2020	bottle	plastic
8560743		51.741231778092/-3.34030984835126	GB	Wed Sep 30 2020	Sep	2020	Sep-2020	aluminum	can
8560684		51.7412101628288/-3.34004645680263	GB	Wed Sep 30 2020	Sep	2020	Sep-2020	aluminum	can
8560666		51.7412333836878/-3.33996413282457	GB	Wed Sep 30 2020	Sep	2020	Sep-2020	plastic	bottle
8560665		51.7412370890188/-3.34002225477643	GB	Wed Sep 30 2020	Sep	2020	Sep-2020	aluminum	can
8560664		51.7412570192008/-3.34007147221308	GB	Wed Sep 30 2020	Sep	2020	Sep-2020	bottle	plastic
8560663		51.7411822448139/-3.34008098166616	GB	Wed Sep 30 2020	Sep	2020	Sep-2020	bottle	plastic
8560661		51.7411822448139/-3.34008098166616	GB	Wed Sep 30 2020	Sep	2020	Sep-2020	bottle	plastic
8560659		51.7412570192008/-3.34007147221308	GB	Wed Sep 30 2020	Sep	2020	Sep-2020	bottle	plastic
8560534		51.7411942706594/-3.3399727929873	GB	Wed Sep 30 2020	Sep	2020	Sep-2020	aluminum	can
8560525		51.7411199310027/-3.33999484472721	GB	Wed Sep 30 2020	Sep	2020	Sep-2020	nitro oxide cartridge
8560524		51.7411942706594/-3.3399727929873	GB	Wed Sep 30 2020	Sep	2020	Sep-2020	aluminum	can
8560522		51.7411982723455/-3.34003717914791	GB	Wed Sep 30 2020	Sep	2020	Sep-2020	aluminum	can
8560520		51.7412376430501/-3.34002348554027	GB	Wed Sep 30 2020	Sep	2020	Sep-2020	plastic	mould
8560519		51.7411970031192/-3.34004120912841	GB	Wed Sep 30 2020	Sep	2020	Sep-2020	can	aluminum
8560392		51.741176089494/-3.34006035673359	GB	Wed Sep 30 2020	Sep	2020	Sep-2020	aluminum	can
8560385		51.7411719210219/-3.34004230008032	GB	Wed Sep 30 2020	Sep	2020	Sep-2020	plastic	bottle
8560384		51.7412657006512/-3.34002762086586	GB	Wed Sep 30 2020	Sep	2020	Sep-2020	aluminum	can
8560382		51.7412657006512/-3.34002762086586	GB	Wed Sep 30 2020	Sep	2020	Sep-2020	aluminum	can
8560379		51.7412422172334/-3.34002362995916	GB	Wed Sep 30 2020	Sep	2020	Sep-2020	bottle	plastic
8560378		51.7412604823963/-3.34003945668226	GB	Wed Sep 30 2020	Sep	2020	Sep-2020	aluminum	can
8560376		51.7413049586348/-3.3399685641287	GB	Wed Sep 30 2020	Sep	2020	Sep-2020	aluminum	can
8560373		51.7412169069669/-3.34003000598596	GB	Wed Sep 30 2020	Sep	2020	Sep-2020	aluminum	can	energydrink
8560370		51.7411926048523/-3.34003737224733	GB	Wed Sep 30 2020	Sep	2020	Sep-2020	aluminum	can
8560369		51.741206238967/-3.34003367768123	GB	Wed Sep 30 2020	Sep	2020	Sep-2020	aluminum	can
8560368		51.7412137421813/-3.34001194044597	GB	Wed Sep 30 2020	Sep	2020	Sep-2020	aluminum	can
8560332		51.741237790871/-3.34001750284439	GB	Wed Sep 30 2020	Sep	2020	Sep-2020	can	aluminum
8560323		51.7412230525309/-3.33999336848379	GB	Wed Sep 30 2020	Sep	2020	Sep-2020	bottlecap	cap
8560320		51.7412463211196/-3.34000658462526	GB	Wed Sep 30 2020	Sep	2020	Sep-2020	plastic	lid	suntanlotion
8560319		51.7411964859568/-3.33994690900144	GB	Wed Sep 30 2020	Sep	2020	Sep-2020	energydrink	aluminum	can
8560318		51.7412230525309/-3.33999336848379	GB	Wed Sep 30 2020	Sep	2020	Sep-2020	bottlecap	plastic
8560317		51.7412214043036/-3.33994949941294	GB	Wed Sep 30 2020	Sep	2020	Sep-2020	aluminum	can
8560316		51.7411922651195/-3.34005598905902	GB	Wed Sep 30 2020	Sep	2020	Sep-2020	plastic	bottle
8560302		51.7412492620912/-3.34008969127267	GB	Wed Sep 30 2020	Sep	2020	Sep-2020	can	aluminum
8560299		51.7412057102361/-3.33994970175633	GB	Wed Sep 30 2020	Sep	2020	Sep-2020	aluminum	can
8560298		51.7412674391431/-3.33994650494473	GB	Wed Sep 30 2020	Sep	2020	Sep-2020	plastic	bottle	shampoo
8560297		51.741168796886/-3.34006539723264	GB	Wed Sep 30 2020	Sep	2020	Sep-2020	plastic	bottle
8560291		51.7411566771909/-3.34009817704357	GB	Wed Sep 30 2020	Sep	2020	Sep-2020	aluminum	can
8560290		51.7412586591973/-3.34001849613799	GB	Wed Sep 30 2020	Sep	2020	Sep-2020	bottle	plastic
8560289		51.7411749697787/-3.34008159822456	GB	Wed Sep 30 2020	Sep	2020	Sep-2020	bottle	plastic
8560288		51.7411652921512/-3.34009270048449	GB	Wed Sep 30 2020	Sep	2020	Sep-2020	aluminum	can
8560231		51.7410581306795/-3.34006508066633	GB	Wed Sep 30 2020	Sep	2020	Sep-2020	plastic	tray
8560230		51.7411900048343/-3.3400275415926	GB	Wed Sep 30 2020	Sep	2020	Sep-2020	can	aluminum	cocacola
8560202		51.7410907707998/-3.33996575839407	GB	Wed Sep 30 2020	Sep	2020	Sep-2020	aluminum	can
8560201		51.7409539686016/-3.34014475002792	GB	Wed Sep 30 2020	Sep	2020	Sep-2020	strongbow	aliminium	can
8560200		51.7411558480292/-3.33992635967475	GB	Wed Sep 30 2020	Sep	2020	Sep-2020	bottle	plastic
8560198		51.7410594442146/-3.33999380752537	GB	Wed Sep 30 2020	Sep	2020	Sep-2020	plastic	bottle
8560197		51.7411339804974/-3.34000778350903	GB	Wed Sep 30 2020	Sep	2020	Sep-2020	bottle	glass	beer
8560196		51.7411780137593/-3.33993826037561	GB	Wed Sep 30 2020	Sep	2020	Sep-2020	aluminum	can
8560195		51.7411393315873/-3.33985517829818	GB	Wed Sep 30 2020	Sep	2020	Sep-2020	can	alunimum
8560147		51.7411066996803/-3.34006606338385	GB	Wed Sep 30 2020	Sep	2020	Sep-2020	plastic	tamponapplicator
8560100		51.7411194295352/-3.33997038850574	GB	Wed Sep 30 2020	Sep	2020	Sep-2020	can pull	aluminum
8560068		51.7411190359252/-3.34002958227298	GB	Wed Sep 30 2020	Sep	2020	Sep-2020	cigarette	cigarettebutt
8560063		51.7412016788925/-3.34004324682726	GB	Wed Sep 30 2020	Sep	2020	Sep-2020	bottle	drink	plastic
8560062		51.7412452215041/-3.34009013121711	GB	Wed Sep 30 2020	Sep	2020	Sep-2020	beer	bottle	glass
8560037		51.741197423857/-3.3399921657776	GB	Wed Sep 30 2020	Sep	2020	Sep-2020	aluminum	can
8560036		51.7412801982262/-3.34006316991299	GB	Wed Sep 30 2020	Sep	2020	Sep-2020	aluminum	can
8560035		51.7412716676746/-3.34012514721746	GB	Wed Sep 30 2020	Sep	2020	Sep-2020	bottle	glass	beer
8560034		51.7412129178787/-3.34012431591149	GB	Wed Sep 30 2020	Sep	2020	Sep-2020	bottle	beer
8560033		51.7412072542127/-3.34010294722418	GB	Wed Sep 30 2020	Sep	2020	Sep-2020	plastic	bottle
8560032		51.7413191861966/-3.34009371365274	GB	Wed Sep 30 2020	Sep	2020	Sep-2020	bottle	beer
8560031		51.7412883314493/-3.34004409224583	GB	Wed Sep 30 2020	Sep	2020	Sep-2020	beer	bottle
8560029		51.7412148193722/-3.34014077396399	GB	Wed Sep 30 2020	Sep	2020	Sep-2020	bottle	plastic
8560028		51.741250389882/-3.34009412544467	GB	Wed Sep 30 2020	Sep	2020	Sep-2020	aluminum	can
8560027		51.7412280643236/-3.34007534085082	GB	Wed Sep 30 2020	Sep	2020	Sep-2020	beer	bottle
8560009		51.7412842939988/-3.34008266061106	GB	Wed Sep 30 2020	Sep	2020	Sep-2020	beer	bottle
8560008		51.7413465113049/-3.34006197521424	GB	Wed Sep 30 2020	Sep	2020	Sep-2020	bottle	beer
8560007		51.7413775536958/-3.34013209901478	GB	Wed Sep 30 2020	Sep	2020	Sep-2020	beer	bottle
8560006		51.7411826964904/-3.3399088399837	GB	Wed Sep 30 2020	Sep	2020	Sep-2020	aluminum	can	energydrink
8560000		51.7412565287147/-3.34010346791492	GB	Wed Sep 30 2020	Sep	2020	Sep-2020	beer	bottle
8559993		51.7412300621294/-3.34016149519071	GB	Wed Sep 30 2020	Sep	2020	Sep-2020	bottle	plastic
8559992		51.7411826964904/-3.3399088399837	GB	Wed Sep 30 2020	Sep	2020	Sep-2020	bottle	plastic
8559991		51.7412457450173/-3.34010822487477	GB	Wed Sep 30 2020	Sep	2020	Sep-2020	bottle	beer
8559990		51.7413327750846/-3.34006843251789	GB	Wed Sep 30 2020	Sep	2020	Sep-2020	aluminum	can	fanta
8559966		51.7411742730504/-3.3399740792777	GB	Wed Sep 30 2020	Sep	2020	Sep-2020	cardboard	budweiser	bottle packaging
8559965		51.7411979927521/-3.33992488914233	GB	Wed Sep 30 2020	Sep	2020	Sep-2020	bottle	plastic
8559964		51.7411581429356/-3.33997594076708	GB	Wed Sep 30 2020	Sep	2020	Sep-2020	bottle	plastic	oasis
8559963		51.7411918561658/-3.33983909670486	GB	Wed Sep 30 2020	Sep	2020	Sep-2020	plastic	bottle
8559962		51.741162333986/-3.33998017869754	GB	Wed Sep 30 2020	Sep	2020	Sep-2020	bottle	plastic
8559961		51.741162333986/-3.33998017869754	GB	Wed Sep 30 2020	Sep	2020	Sep-2020	bottle	plastic
8559957		51.7411416424292/-3.33989626597806	GB	Wed Sep 30 2020	Sep	2020	Sep-2020	bottle	plastic
8559951		51.7412406893233/-3.33987231414535	GB	Wed Sep 30 2020	Sep	2020	Sep-2020	plastic	cup
8559943		51.741201526115/-3.33998328833287	GB	Wed Sep 30 2020	Sep	2020	Sep-2020	bottle	plastic	milk
8559942		51.7412240414813/-3.33985610870865	GB	Wed Sep 30 2020	Sep	2020	Sep-2020	bottle	plastic	water
8559941		51.7411664368895/-3.33997405831465	GB	Wed Sep 30 2020	Sep	2020	Sep-2020	bottle	plastic
8559940		51.7412009614222/-3.33992255545815	GB	Wed Sep 30 2020	Sep	2020	Sep-2020	cardboard	bottle packaging
8559938		51.7412819876666/-3.33985457564351	GB	Wed Sep 30 2020	Sep	2020	Sep-2020	butt	cigarette
8559937		51.7411627189026/-3.33999086551669	GB	Wed Sep 30 2020	Sep	2020	Sep-2020	plastic	bottle
8559935		51.7411864090041/-3.33994131373113	GB	Wed Sep 30 2020	Sep	2020	Sep-2020	plastic	bottle
8559934		51.7411242636171/-3.34001569948786	GB	Wed Sep 30 2020	Sep	2020	Sep-2020	plastic	bottle
8559933		51.7411357212493/-3.33997425477549	GB	Wed Sep 30 2020	Sep	2020	Sep-2020	plastic	bottle	fruitshoot
8559932		51.7411572995334/-3.34004230982292	GB	Wed Sep 30 2020	Sep	2020	Sep-2020	nitro oxide cartridge
8559931		51.7411200228203/-3.34006122796016	GB	Wed Sep 30 2020	Sep	2020	Sep-2020	cugarette butt
8559930		51.741078729668/-3.34001462946722	GB	Wed Sep 30 2020	Sep	2020	Sep-2020	nitrous oxide cartridge
8559929		51.7411357212493/-3.33997425477549	GB	Wed Sep 30 2020	Sep	2020	Sep-2020	plastic	bottle
8559917		51.7411274095696/-3.34001582244971	GB	Wed Sep 30 2020	Sep	2020	Sep-2020	bottle	plastic
8559916		51.741175258103/-3.34003802704623	GB	Wed Sep 30 2020	Sep	2020	Sep-2020	aluminum	can	rio
8559915		51.7411584887146/-3.33997343955967	GB	Wed Sep 30 2020	Sep	2020	Sep-2020	bottle	plastic
8559909		51.7411670560171/-3.33996190450821	GB	Wed Sep 30 2020	Sep	2020	Sep-2020	bottle	plastic
8559902		51.7411613344058/-3.3399965934072	GB	Wed Sep 30 2020	Sep	2020	Sep-2020	bottle	plastic
8559901		51.741130649648/-3.33999761375304	GB	Wed Sep 30 2020	Sep	2020	Sep-2020	aluminum	can
8559893		51.7412553068995/-3.33997525950827	GB	Wed Sep 30 2020	Sep	2020	Sep-2020	bottle	plastic
8559888		51.7412893599271/-3.33987775750772	GB	Wed Sep 30 2020	Sep	2020	Sep-2020	aluminum	can	energydrink
8559870		51.7412681532902/-3.33990260437982	GB	Wed Sep 30 2020	Sep	2020	Sep-2020	bottle	plastic	water
8559866		51.7412681532902/-3.33990260437982	GB	Wed Sep 30 2020	Sep	2020	Sep-2020	bottle	plastic
8559864		51.7411352101526/-3.33995304980908	GB	Wed Sep 30 2020	Sep	2020	Sep-2020	bottle	glass	budweiser
8559441		51.7411580636871/-3.34000722518042	GB	Wed Sep 30 2020	Sep	2020	Sep-2020	nitro oxide cartridge
8559436		51.7411656892605/-3.33988323128182	GB	Wed Sep 30 2020	Sep	2020	Sep-2020	nitro oxide cartridge
8559435		51.7411656892605/-3.33988323128182	GB	Wed Sep 30 2020	Sep	2020	Sep-2020	nitro oxide cartridge
8559434		51.7411500127721/-3.33991022757794	GB	Wed Sep 30 2020	Sep	2020	Sep-2020	nitro oxide cartridge
8559432		51.7410949261608/-3.33997576613562	GB	Wed Sep 30 2020	Sep	2020	Sep-2020	bottlecap	pepsi	plastic
8559431		51.7411628896674/-3.33994450576692	GB	Wed Sep 30 2020	Sep	2020	Sep-2020	nitro oxide cartridge
8541442		51.805239502306/-0.294122191985484	GB	Wed Sep 30 2020	Sep	2020	Sep-2020	bag
8541441		51.8034638278853/-0.295183350600935	GB	Wed Sep 30 2020	Sep	2020	Sep-2020	wrapper
8541209		51.7981833208698/-0.296577158452117	GB	Wed Sep 30 2020	Sep	2020	Sep-2020	plastic	bottle
8541208		51.8018751543979/-0.295875818702849	GB	Wed Sep 30 2020	Sep	2020	Sep-2020	beer	drink
8541207		51.7981880999117/-0.296598690139914	GB	Wed Sep 30 2020	Sep	2020	Sep-2020	plastic
8541206		51.7981903169013/-0.296594679358748	GB	Wed Sep 30 2020	Sep	2020	Sep-2020	wrapper
8540867		51.7974333080966/-0.297901754920644	GB	Wed Sep 30 2020	Sep	2020	Sep-2020	candy	wrapper
8540866		51.7973425706203/-0.297588025578881	GB	Wed Sep 30 2020	Sep	2020	Sep-2020	food	plastic	wrapper
8540864		51.7973463007146/-0.297841869370342	GB	Wed Sep 30 2020	Sep	2020	Sep-2020	plastic	fork
8540863		51.7982550337097/-0.296525018398979	GB	Wed Sep 30 2020	Sep	2020	Sep-2020	plastic
8540862		51.7982153351962/-0.296558513436604	GB	Wed Sep 30 2020	Sep	2020	Sep-2020	wrapper
8540861		51.7971309600932/-0.295997597783213	GB	Wed Sep 30 2020	Sep	2020	Sep-2020	tissue
8540860		51.7983031234003/-0.296535697706578	GB	Wed Sep 30 2020	Sep	2020	Sep-2020	plastic	bottle
8540859		51.79827409042/-0.296550686232839	GB	Wed Sep 30 2020	Sep	2020	Sep-2020	wrapper
8540858		51.7982389192384/-0.296576528839658	GB	Wed Sep 30 2020	Sep	2020	Sep-2020	plastic
8540857		51.7982416897903/-0.296577560648109	GB	Wed Sep 30 2020	Sep	2020	Sep-2020	lagercan
8540856		51.7974315183721/-0.297886383291652	GB	Wed Sep 30 2020	Sep	2020	Sep-2020	paper
8540523		51.7975538584957/-0.300311900677993	GB	Wed Sep 30 2020	Sep	2020	Sep-2020	candy	wrapper
8540522		51.797224452135/-0.298010214928497	GB	Wed Sep 30 2020	Sep	2020	Sep-2020	straw
8540521		51.7972089299129/-0.298201587942987	GB	Wed Sep 30 2020	Sep	2020	Sep-2020	plastic	bottle
8540520		51.7970657912747/-0.298134730088187	GB	Wed Sep 30 2020	Sep	2020	Sep-2020	paper
8540519		51.7970631754165/-0.298137757326808	GB	Wed Sep 30 2020	Sep	2020	Sep-2020	plastic	lid
8540516		51.7972276722951/-0.29916124259216	GB	Wed Sep 30 2020	Sep	2020	Sep-2020	redbull
8540514		51.7972398814253/-0.299165504792775	GB	Wed Sep 30 2020	Sep	2020	Sep-2020	crisppacket
8540513		51.7975653045446/-0.300609842528559	GB	Wed Sep 30 2020	Sep	2020	Sep-2020	cocacola	can
8540511		51.7975479358441/-0.300319750887592	GB	Wed Sep 30 2020	Sep	2020	Sep-2020	candywrapper
8540510		51.7972413381168/-0.29911954843356	GB	Wed Sep 30 2020	Sep	2020	Sep-2020	wrapper
8540505		51.7974773522313/-0.299915962665845	GB	Wed Sep 30 2020	Sep	2020	Sep-2020	plastic	bottle
8540499		51.7975464504532/-0.300354415074076	GB	Wed Sep 30 2020	Sep	2020	Sep-2020	plastic
8540497		51.7975739598994/-0.300300458344003	GB	Wed Sep 30 2020	Sep	2020	Sep-2020	cigarette	butt
8540492		51.7975419077383/-0.300286210713158	GB	Wed Sep 30 2020	Sep	2020	Sep-2020	cigarettebutt
8540445		51.7975500860118/-0.300354928188879	GB	Wed Sep 30 2020	Sep	2020	Sep-2020	paper
8540443		51.7975557809522/-0.300359916575864	GB	Wed Sep 30 2020	Sep	2020	Sep-2020	plastic	lid
8540415		51.7975437079828/-0.300345275209805	GB	Wed Sep 30 2020	Sep	2020	Sep-2020	paper
8540413		51.7975467825893/-0.300354033913911	GB	Wed Sep 30 2020	Sep	2020	Sep-2020	cigarettebox
8540412		51.7975426740637/-0.300339490766197	GB	Wed Sep 30 2020	Sep	2020	Sep-2020	plastic
8540403		51.797543462807/-0.300323813831863	GB	Wed Sep 30 2020	Sep	2020	Sep-2020	babywipe
8540402		51.797540367221/-0.300326230879801	GB	Wed Sep 30 2020	Sep	2020	Sep-2020	plastic	wrapper
8540401		51.7976790556315/-0.300778643360968	GB	Wed Sep 30 2020	Sep	2020	Sep-2020	paper
8539966		51.7976191494807/-0.30086477880171	GB	Wed Sep 30 2020	Sep	2020	Sep-2020	redbull
8539931		51.7990289780102/-0.303047691458457	GB	Wed Sep 30 2020	Sep	2020	Sep-2020	crisp bag
8539930		51.7989501424556/-0.303111704234432	GB	Wed Sep 30 2020	Sep	2020	Sep-2020	candy	wrapper
8539929		51.7983010498169/-0.302569221795782	GB	Wed Sep 30 2020	Sep	2020	Sep-2020	red bull
8539928		51.7990150475726/-0.303104263723317	GB	Wed Sep 30 2020	Sep	2020	Sep-2020	lager can	wrapper
8539927		51.7981723002222/-0.302695610596972	GB	Wed Sep 30 2020	Sep	2020	Sep-2020	plastic	bottle
8539926		51.7990317203875/-0.303018334542454	GB	Wed Sep 30 2020	Sep	2020	Sep-2020	energydrink	aluminum
8539925		51.7990322920652/-0.303042728726789	GB	Wed Sep 30 2020	Sep	2020	Sep-2020	cocacola	can
8539924		51.7990290087829/-0.303014852945158	GB	Wed Sep 30 2020	Sep	2020	Sep-2020	candy wrapper	cokecan
8539708		51.7991718871969/-0.303022203749821	GB	Wed Sep 30 2020	Sep	2020	Sep-2020	candy	wrapper
8539705		51.7992549624349/-0.303206372715768	GB	Wed Sep 30 2020	Sep	2020	Sep-2020	beer	can
8539600		51.4082498438435/-0.950973190750205	GB	Wed Sep 30 2020	Sep	2020	Sep-2020	sweetwrapper	galaxy
8539561		51.407162902219/-0.950928607721796	GB	Wed Sep 30 2020	Sep	2020	Sep-2020	hellofresh	bag	plastic
8539549		51.4072218129908/-0.950517154340404	GB	Wed Sep 30 2020	Sep	2020	Sep-2020	cup	mcdonalds	takeawaycup
8539548		51.7998189650479/-0.30319505555257	GB	Wed Sep 30 2020	Sep	2020	Sep-2020	plastic
8539513		51.799722210782/-0.303439133031208	GB	Wed Sep 30 2020	Sep	2020	Sep-2020	beer	can
8539457		51.799999736715/-0.303582524215941	GB	Wed Sep 30 2020	Sep	2020	Sep-2020	plastic
8539456		51.8019489053578/-0.30521013699413	GB	Wed Sep 30 2020	Sep	2020	Sep-2020	energydrinkcan
8539455		51.7996743955743/-0.303425331980096	GB	Wed Sep 30 2020	Sep	2020	Sep-2020	paper
8539453		51.8013432812119/-0.304577521515801	GB	Wed Sep 30 2020	Sep	2020	Sep-2020	pill	wrapper
8539452		51.800029589371/-0.303515027052903	GB	Wed Sep 30 2020	Sep	2020	Sep-2020	wrapper
8539451		51.8000530431542/-0.303555434069757	GB	Wed Sep 30 2020	Sep	2020	Sep-2020	paper
8539450		51.8020113834377/-0.305268595263362	GB	Wed Sep 30 2020	Sep	2020	Sep-2020	plastic	bottlecap
8539277		51.8022600081292/-0.305433939817887	GB	Wed Sep 30 2020	Sep	2020	Sep-2020	paper
8539276		51.8021704570072/-0.305383380858255	GB	Wed Sep 30 2020	Sep	2020	Sep-2020	beer	drink
8539261		51.8023910651432/-0.305504680370544	GB	Wed Sep 30 2020	Sep	2020	Sep-2020	plastic	lid	mcdonalds
8539260		51.8023963941663/-0.30551462063374	GB	Wed Sep 30 2020	Sep	2020	Sep-2020	mcdonalds	cup
8539259		51.8041056179804/-0.308510559392563	GB	Wed Sep 30 2020	Sep	2020	Sep-2020	paper
8539257		51.8041020748049/-0.3085819859814	GB	Wed Sep 30 2020	Sep	2020	Sep-2020	plastic
8539256		51.8027124018729/-0.305822921464388	GB	Wed Sep 30 2020	Sep	2020	Sep-2020	beer can
8539255		51.8043837938272/-0.308734752465354	GB	Wed Sep 30 2020	Sep	2020	Sep-2020	piece	wrapper
8539254		51.8027084021748/-0.305792657757679	GB	Wed Sep 30 2020	Sep	2020	Sep-2020	carboard	box
8539253		51.803225925659/-0.306211762238541	GB	Wed Sep 30 2020	Sep	2020	Sep-2020	plastic
8539252		51.8027002870661/-0.305786691971782	GB	Wed Sep 30 2020	Sep	2020	Sep-2020	plastic	bottle
8539251		51.8029952153868/-0.305995420028171	GB	Wed Sep 30 2020	Sep	2020	Sep-2020	candy	wrapper
8539250		51.8034477242028/-0.306725275760574	GB	Wed Sep 30 2020	Sep	2020	Sep-2020	wrapper
8539249		51.8046122088782/-0.308887364321157	GB	Wed Sep 30 2020	Sep	2020	Sep-2020	wrapper
8538889		51.8074577820886/-0.298432740388253	GB	Wed Sep 30 2020	Sep	2020	Sep-2020	tissue
8538887		51.8044992671302/-0.309506406268777	GB	Wed Sep 30 2020	Sep	2020	Sep-2020	lager can
8538886		51.8045931031437/-0.309309789151842	GB	Wed Sep 30 2020	Sep	2020	Sep-2020	beer	bottle
8538883		51.8046311259622/-0.309260193340107	GB	Wed Sep 30 2020	Sep	2020	Sep-2020	plastic
8538881		51.8046584674354/-0.309025690108318	GB	Wed Sep 30 2020	Sep	2020	Sep-2020	wrapper
8538880		51.8074416801485/-0.298372277521615	GB	Wed Sep 30 2020	Sep	2020	Sep-2020	plastic	cap
8538879		51.8073569913117/-0.297636127050788	GB	Wed Sep 30 2020	Sep	2020	Sep-2020	cigarette	butt
8538878		51.8046820830926/-0.308907882329766	GB	Wed Sep 30 2020	Sep	2020	Sep-2020	wrapper
8538877		51.806342273584/-0.303619895470246	GB	Wed Sep 30 2020	Sep	2020	Sep-2020	babywipe
8538876		51.8064702190514/-0.303421231992445	GB	Wed Sep 30 2020	Sep	2020	Sep-2020	candywrapper
8538875		51.8063400371591/-0.303623238639848	GB	Wed Sep 30 2020	Sep	2020	Sep-2020	candy	wrapper
8538873		51.8065634978161/-0.303253770313264	GB	Wed Sep 30 2020	Sep	2020	Sep-2020	candy	wrapper
8538872		51.8065702308191/-0.303241630015304	GB	Wed Sep 30 2020	Sep	2020	Sep-2020	candywrapper
8538871		51.8065745624122/-0.303237029047806	GB	Wed Sep 30 2020	Sep	2020	Sep-2020	candywrapper
8538870		51.8065957583245/-0.303226524293832	GB	Wed Sep 30 2020	Sep	2020	Sep-2020	candy	wrapper
8538869		51.8068325494978/-0.302740791112287	GB	Wed Sep 30 2020	Sep	2020	Sep-2020	paper	cup
8538867		51.8074748696268/-0.301700643582893	GB	Wed Sep 30 2020	Sep	2020	Sep-2020	plastic
8538866		51.8074951701662/-0.298613054450258	GB	Wed Sep 30 2020	Sep	2020	Sep-2020	cardboard
8538865		51.8073145415927/-0.297492264521487	GB	Wed Sep 30 2020	Sep	2020	Sep-2020	cokecan
8537744		51.8053640132323/-0.294018300038417	GB	Wed Sep 30 2020	Sep	2020	Sep-2020	candywrapper
8537743		51.8053740373452/-0.294023639886188	GB	Wed Sep 30 2020	Sep	2020	Sep-2020	drinkcarton
8537742		51.8053675069211/-0.294019593032152	GB	Wed Sep 30 2020	Sep	2020	Sep-2020	cigarettepack
8537734		51.805372559304/-0.29402073109687	GB	Wed Sep 30 2020	Sep	2020	Sep-2020	wrapper
8537729		51.8052989765339/-0.293735177029288	GB	Wed Sep 30 2020	Sep	2020	Sep-2020	plastic	fork
8537657		51.8053090016572/-0.2937531222533	GB	Wed Sep 30 2020	Sep	2020	Sep-2020	bottlecap	plastic
8537656		51.8053107394989/-0.293755666365109	GB	Wed Sep 30 2020	Sep	2020	Sep-2020	plastic	bottle
8537655		51.8053143740048/-0.293748705044013	GB	Wed Sep 30 2020	Sep	2020	Sep-2020	bottlecap
8537654		51.8053269329502/-0.293640857574917	GB	Wed Sep 30 2020	Sep	2020	Sep-2020	can
8537653		51.805331039761/-0.293642532755232	GB	Wed Sep 30 2020	Sep	2020	Sep-2020	plastic lid
8536099		53.7961131135538/-1.55427711244212	GB	Wed Sep 30 2020	Sep	2020	Sep-2020	plastic	facemask	ppe
8531167		51.7357342858857/0.687309575797879	GB	Wed Sep 30 2020	Sep	2020	Sep-2020	shrinkwrap	plastic
8531063		51.7352746568972/0.687462502567976	GB	Wed Sep 30 2020	Sep	2020	Sep-2020	plastic
8531004		51.7354091822534/0.6870124005189	GB	Wed Sep 30 2020	Sep	2020	Sep-2020	plastic	sweetwrapper
8529339		51.8132602794631/-0.293708014936433	GB	Wed Sep 30 2020	Sep	2020	Sep-2020	bag
8529335		51.8132156814658/-0.293911454934525	GB	Wed Sep 30 2020	Sep	2020	Sep-2020	bottlecap
8529327		51.8133842528021/-0.295451094040228	GB	Mon Sep 28 2020	Sep	2020	Sep-2020	bottle
8529316		51.8134556838245/-0.295625917316475	GB	Wed Sep 30 2020	Sep	2020	Sep-2020	plastic
8529314		51.8130288818049/-0.291318337288516	GB	Mon Sep 28 2020	Sep	2020	Sep-2020	wrapper
8529313		51.8132108445447/-0.293534056041447	GB	Mon Sep 28 2020	Sep	2020	Sep-2020	bottle
8529312		51.8132229400111/-0.293806282812336	GB	Wed Sep 30 2020	Sep	2020	Sep-2020	aluminum
8529213		51.7361624185703/0.68511081038267	GB	Wed Sep 30 2020	Sep	2020	Sep-2020	shelf	wood
8527417		54.9674497917806/-1.87160052359278	GB	Wed Sep 30 2020	Sep	2020	Sep-2020	candy	wrapper	sweetwrapper
8525508		51.7374217163573/0.683321910016469	GB	Wed Sep 30 2020	Sep	2020	Sep-2020	facemask
8525230		51.996874150067/-0.795092248729895	GB	Wed Sep 30 2020	Sep	2020	Sep-2020	lucazade	plasticbottle
8525204		51.9968306739131/-0.79519425839318	GB	Wed Sep 30 2020	Sep	2020	Sep-2020	sweetswrapper
8525202		51.9967416745453/-0.791168461713992	GB	Wed Sep 30 2020	Sep	2020	Sep-2020	mcdonalds	cup
8525201		51.9966240583641/-0.791369115431294	GB	Wed Sep 30 2020	Sep	2020	Sep-2020	mcdonald's	paper	cup
8525199		51.9959023950463/-0.790562049524441	GB	Wed Sep 30 2020	Sep	2020	Sep-2020	snickerswrapper
8525198		51.9957404571487/-0.790359918174296	GB	Wed Sep 30 2020	Sep	2020	Sep-2020	sportdrink	plastic
8525197		51.9956084184737/-0.789797130823609	GB	Wed Sep 30 2020	Sep	2020	Sep-2020	costa	coffeecup
8525196		51.9957085312399/-0.789830017987145	GB	Wed Sep 30 2020	Sep	2020	Sep-2020	plastic	water	evian bottle
8525195		51.9959230666795/-0.790527873082619	GB	Wed Sep 30 2020	Sep	2020	Sep-2020	energydrink	redbull
8525194		51.9960131454439/-0.790411299572224	GB	Wed Sep 30 2020	Sep	2020	Sep-2020	asda	yogurt drink
8525193		51.9959318871171/-0.79048980638474	GB	Wed Sep 30 2020	Sep	2020	Sep-2020	coop	plastic
8525192		51.9958520896658/-0.790543944710549	GB	Wed Sep 30 2020	Sep	2020	Sep-2020	tesco	pineapple	plastic
8525191		51.9958266344924/-0.790595100084946	GB	Wed Sep 30 2020	Sep	2020	Sep-2020	plastic	bottle
8525190		51.9957613638519/-0.789913928715947	GB	Wed Sep 30 2020	Sep	2020	Sep-2020	lucazade	plastic	bottle
8525135		51.9950525029312/-0.790085457771642	GB	Wed Sep 30 2020	Sep	2020	Sep-2020	energydrink	redbull	can
8525129		51.8269592124887/0.699055286133495	GB	Wed Sep 30 2020	Sep	2020	Sep-2020	can	metal
8525128		51.8269361672454/0.699128910329886	GB	Wed Sep 30 2020	Sep	2020	Sep-2020	paper	wrapper
8505916		53.385686/-0.3295839	GB	Tue Sep 29 2020	Sep	2020	Sep-2020	cigarette
8505915		53.385686/-0.3295839	GB	Tue Sep 29 2020	Sep	2020	Sep-2020	cigarette	butt
8505914		53.385686/-0.3295839	GB	Tue Sep 29 2020	Sep	2020	Sep-2020	aluminum
8505913		53.385686/-0.3295839	GB	Tue Sep 29 2020	Sep	2020	Sep-2020	can	cocacola
8505912		53.385686/-0.3295839	GB	Tue Sep 29 2020	Sep	2020	Sep-2020	plastic	sandwich box
8505121		55.0480648043227/-3.60266385150354	GB	Tue Sep 29 2020	Sep	2020	Sep-2020	plastic
8505120		55.0485621329641/-3.60357397869392	GB	Tue Sep 29 2020	Sep	2020	Sep-2020	plastic
8505119		55.0486446614215/-3.60206984610159	GB	Tue Sep 29 2020	Sep	2020	Sep-2020	plastic
8505118		55.0483915182387/-3.60413194263993	GB	Tue Sep 29 2020	Sep	2020	Sep-2020	plastic
8505117		55.048209470748/-3.60418726690449	GB	Tue Sep 29 2020	Sep	2020	Sep-2020	plastic
8505116		55.0482771965256/-3.6041264981065	GB	Tue Sep 29 2020	Sep	2020	Sep-2020	packet
8505115		55.0486489339313/-3.60404846258797	GB	Tue Sep 29 2020	Sep	2020	Sep-2020	cigarettepack
8505114		55.0487435656181/-3.6040054634247	GB	Tue Sep 29 2020	Sep	2020	Sep-2020	facemask
8505113		55.0488650193951/-3.60394477844574	GB	Tue Sep 29 2020	Sep	2020	Sep-2020	plastic
8505112		55.0489740679553/-3.60407939181067	GB	Tue Sep 29 2020	Sep	2020	Sep-2020	can
8505111		55.0489252852789/-3.60416212119498	GB	Tue Sep 29 2020	Sep	2020	Sep-2020	paper
8505110		55.0476431426303/-3.60314026409446	GB	Tue Sep 29 2020	Sep	2020	Sep-2020	paper
8505109		55.0490014348692/-3.60383405350484	GB	Tue Sep 29 2020	Sep	2020	Sep-2020	plastic
8504306		50.9250756/-1.3757975	GB	Tue Sep 29 2020	Sep	2020	Sep-2020	facemask
8504037		50.9296432/-1.3662449	GB	Tue Sep 29 2020	Sep	2020	Sep-2020	facemask
8503923		52.0357448/-0.7188415	GB	Tue Sep 29 2020	Sep	2020	Sep-2020	can	softdrink
8503922		52.0353191/-0.7157023	GB	Tue Sep 29 2020	Sep	2020	Sep-2020	candywrapper	wrapper
8503921		52.0350807/-0.7153136	GB	Tue Sep 29 2020	Sep	2020	Sep-2020	foil
8503920		52.035771/-0.7166476	GB	Tue Sep 29 2020	Sep	2020	Sep-2020	paper	candywrapper
8503919		52.0343412/-0.7144467	GB	Tue Sep 29 2020	Sep	2020	Sep-2020	plastic	fork
8503918		52.0331824/-0.7137791	GB	Tue Sep 29 2020	Sep	2020	Sep-2020	can	softdrink
8503917		52.0338637/-0.7117682	GB	Tue Sep 29 2020	Sep	2020	Sep-2020	bottle	plastic	pepsi
8503916		52.0335171/-0.7141607	GB	Tue Sep 29 2020	Sep	2020	Sep-2020	candy	wrapper
8503915		52.034451/-0.7147095	GB	Tue Sep 29 2020	Sep	2020	Sep-2020	wrapper
8503914		52.0332294/-0.7127565	GB	Tue Sep 29 2020	Sep	2020	Sep-2020	plastic
8503913		52.0338095/-0.7119641	GB	Tue Sep 29 2020	Sep	2020	Sep-2020	bottle	water	plastic
8503912		52.0334848/-0.7141399	GB	Tue Sep 29 2020	Sep	2020	Sep-2020	cigarette	butt
8503911		52.033498/-0.7141736	GB	Tue Sep 29 2020	Sep	2020	Sep-2020	bottlecap
8503910		52.0334939/-0.7141571	GB	Tue Sep 29 2020	Sep	2020	Sep-2020	bottlecap
8499505		51.550880291998/-3.38561048917847	GB	Tue Sep 29 2020	Sep	2020	Sep-2020	plastic	cup	unbranded
8498845		51.6467202930477/-3.29027448817524	GB	Tue Sep 29 2020	Sep	2020	Sep-2020	steelscrap
8498837		51.6466639023393/-3.29031564176914	GB	Tue Sep 29 2020	Sep	2020	Sep-2020	metal	piece
8498836		51.6467202930477/-3.29027448817524	GB	Tue Sep 29 2020	Sep	2020	Sep-2020	steelscrap
8498835		51.6469794711213/-3.29075552738338	GB	Tue Sep 29 2020	Sep	2020	Sep-2020	steelscrap
8498834		51.6466631190658/-3.29032046752267	GB	Tue Sep 29 2020	Sep	2020	Sep-2020	metal piece
8498829		51.6469639907804/-3.29075169918462	GB	Tue Sep 29 2020	Sep	2020	Sep-2020	steelscrap
8498821		51.6466572856898/-3.29031338900499	GB	Tue Sep 29 2020	Sep	2020	Sep-2020	steelscrap
8498816		51.6466904782539/-3.2903298341389	GB	Tue Sep 29 2020	Sep	2020	Sep-2020	steelscrap
8498810		51.6466590701725/-3.29030110612087	GB	Tue Sep 29 2020	Sep	2020	Sep-2020	steelscrap
8498809		51.6468610064108/-3.29039898247463	GB	Tue Sep 29 2020	Sep	2020	Sep-2020	steelscrap
8498659		51.6466805094373/-3.29032036962953	GB	Tue Sep 29 2020	Sep	2020	Sep-2020	steelscrap
8498658		51.646573632018/-3.29022924185857	GB	Tue Sep 29 2020	Sep	2020	Sep-2020	steelscrap
8498657		51.6465534756889/-3.2901832941421	GB	Tue Sep 29 2020	Sep	2020	Sep-2020	steelscrap
8498656		51.6465504083466/-3.29018145548473	GB	Tue Sep 29 2020	Sep	2020	Sep-2020	steelscrap
8498655		51.6465586727391/-3.29021340300513	GB	Tue Sep 29 2020	Sep	2020	Sep-2020	steelscrap
8498654		51.6465144785134/-3.29015341816415	GB	Tue Sep 29 2020	Sep	2020	Sep-2020	steelscrap
8498653		51.6465799430942/-3.29014941073107	GB	Tue Sep 29 2020	Sep	2020	Sep-2020	steelscrap
8498652		51.6466229303844/-3.29036282145869	GB	Tue Sep 29 2020	Sep	2020	Sep-2020	steelscrap
8498651		51.6466805094373/-3.29032036962953	GB	Tue Sep 29 2020	Sep	2020	Sep-2020	steelscrap
8498650		51.6465824058364/-3.29019014078593	GB	Tue Sep 29 2020	Sep	2020	Sep-2020	steelscrap
8498649		51.6466271523459/-3.29026840255043	GB	Tue Sep 29 2020	Sep	2020	Sep-2020	steelscrap
8498648		51.6466271523459/-3.29026840255043	GB	Tue Sep 29 2020	Sep	2020	Sep-2020	steelscrap
8498647		51.6466176305856/-3.29036249003064	GB	Tue Sep 29 2020	Sep	2020	Sep-2020	steelscrap
8498646		51.6466169176724/-3.29018965232259	GB	Tue Sep 29 2020	Sep	2020	Sep-2020	steelscrap
8498645		51.6466271523459/-3.29026840255043	GB	Tue Sep 29 2020	Sep	2020	Sep-2020	steelscrap
8498644		51.6466190880347/-3.29026739306792	GB	Tue Sep 29 2020	Sep	2020	Sep-2020	steelscrap
8498643		51.6466107363074/-3.29029437740523	GB	Tue Sep 29 2020	Sep	2020	Sep-2020	steelscrap
8498642		51.6466097592112/-3.290283916028	GB	Tue Sep 29 2020	Sep	2020	Sep-2020	cigarette	butt
8498641		51.6466101920762/-3.29028013479926	GB	Tue Sep 29 2020	Sep	2020	Sep-2020	steelscrap
8498640		51.6466104160439/-3.29031018575204	GB	Tue Sep 29 2020	Sep	2020	Sep-2020	steelscrap
8498639		51.6466332554867/-3.29036924915434	GB	Tue Sep 29 2020	Sep	2020	Sep-2020	cigarette	butt
8498583		51.6466366561326/-3.29026746772929	GB	Tue Sep 29 2020	Sep	2020	Sep-2020	cigarette	butt
8498582		51.6466355094156/-3.29022748128537	GB	Tue Sep 29 2020	Sep	2020	Sep-2020	steelscrap
8498581		51.6465594179914/-3.29027948666495	GB	Tue Sep 29 2020	Sep	2020	Sep-2020	cigarette	cigarette butt
8498580		51.6466294075489/-3.29024036620878	GB	Tue Sep 29 2020	Sep	2020	Sep-2020	steelscrap
8498579		51.6466113455893/-3.2902575335108	GB	Tue Sep 29 2020	Sep	2020	Sep-2020	steelscrap
8498578		51.6466363376999/-3.29025332724635	GB	Tue Sep 29 2020	Sep	2020	Sep-2020	steelscrap
8498577		51.6466334415585/-3.29023237434245	GB	Tue Sep 29 2020	Sep	2020	Sep-2020	steelscrap
8498576		51.6466317497572/-3.29022922216875	GB	Tue Sep 29 2020	Sep	2020	Sep-2020	steelscrap
8498575		51.6466429571124/-3.29024554807784	GB	Tue Sep 29 2020	Sep	2020	Sep-2020	steelscrap
8498574		51.6464982808605/-3.2902184513612	GB	Tue Sep 29 2020	Sep	2020	Sep-2020	plastic	wrapper
8498571		51.5648285/-0.0756227	GB	Tue Sep 29 2020	Sep	2020	Sep-2020	ppe
8498544		51.6465814181945/-3.290215163081	GB	Tue Sep 29 2020	Sep	2020	Sep-2020	steelscrap
8498543		51.6466521572918/-3.29024431776067	GB	Tue Sep 29 2020	Sep	2020	Sep-2020	steelscrap
8498542		51.6466146347864/-3.29031335983239	GB	Tue Sep 29 2020	Sep	2020	Sep-2020	steelscrap
8498541		51.6467067796462/-3.29052002963033	GB	Tue Sep 29 2020	Sep	2020	Sep-2020	steelscrap
8498538		51.6466457079003/-3.29036152560553	GB	Tue Sep 29 2020	Sep	2020	Sep-2020	steelscrap
8498534		51.6466521572918/-3.29024431776067	GB	Tue Sep 29 2020	Sep	2020	Sep-2020	steelscrap
8498533		51.6466509693912/-3.2902524803738	GB	Tue Sep 29 2020	Sep	2020	Sep-2020	steelscrap
8498521		51.6466509693912/-3.2902524803738	GB	Tue Sep 29 2020	Sep	2020	Sep-2020	steelscrap
8498520		51.6466097592735/-3.2903876265964	GB	Tue Sep 29 2020	Sep	2020	Sep-2020	steelscrap
8498519		51.6466484221786/-3.29035110527848	GB	Tue Sep 29 2020	Sep	2020	Sep-2020	steelscrap
8498518		51.646702826812/-3.29040618301427	GB	Tue Sep 29 2020	Sep	2020	Sep-2020	steelscrap
8498245		51.6465787874748/-3.29021028364581	GB	Tue Sep 29 2020	Sep	2020	Sep-2020	steelscrap
8498238		51.6465780325568/-3.29021021493477	GB	Tue Sep 29 2020	Sep	2020	Sep-2020	steelscrap
8498233		51.6469659650637/-3.29074925988562	GB	Tue Sep 29 2020	Sep	2020	Sep-2020	steelscrap
8498231		51.6469649853037/-3.29074640210691	GB	Tue Sep 29 2020	Sep	2020	Sep-2020	steelscrap
8498230		51.6465803767777/-3.29021137536598	GB	Tue Sep 29 2020	Sep	2020	Sep-2020	steelscrap
8498227		51.6465672433511/-3.29028259062564	GB	Tue Sep 29 2020	Sep	2020	Sep-2020	steelscrap
8498224		51.6465944017224/-3.29025153800181	GB	Tue Sep 29 2020	Sep	2020	Sep-2020	steelscrap
8498218		51.6465755884018/-3.29020823585851	GB	Tue Sep 29 2020	Sep	2020	Sep-2020	steelscrap
8498212		51.6465769826472/-3.29020982692596	GB	Tue Sep 29 2020	Sep	2020	Sep-2020	steelscrap
8498206		51.6465709453858/-3.290213729203	GB	Tue Sep 29 2020	Sep	2020	Sep-2020	steelscrap
8498204		51.6465725495643/-3.29021436026592	GB	Tue Sep 29 2020	Sep	2020	Sep-2020	steelscrap
8498201		51.6465707711411/-3.29021980865066	GB	Tue Sep 29 2020	Sep	2020	Sep-2020	steelscrap
8498199		51.6465604552479/-3.29021116510353	GB	Tue Sep 29 2020	Sep	2020	Sep-2020	steelscrap
8498193		51.6465776603426/-3.29020914183621	GB	Tue Sep 29 2020	Sep	2020	Sep-2020	steelscrap
8498189		51.6465857775713/-3.29021367305255	GB	Tue Sep 29 2020	Sep	2020	Sep-2020	steelscrap
8498185		51.6465730145523/-3.29021222113306	GB	Tue Sep 29 2020	Sep	2020	Sep-2020	steelscrap
8498184		51.6465675728387/-3.29021497405933	GB	Tue Sep 29 2020	Sep	2020	Sep-2020	steelscrap
8498183		51.6465773371536/-3.29020561287296	GB	Tue Sep 29 2020	Sep	2020	Sep-2020	steelscrap
8498181		51.6465794901588/-3.29023763518732	GB	Tue Sep 29 2020	Sep	2020	Sep-2020	steelscrap
8498053		51.6468185438839/-3.29103768761073	GB	Tue Sep 29 2020	Sep	2020	Sep-2020	cigarette	butt
8498049		51.6467882359513/-3.2906732354243	GB	Tue Sep 29 2020	Sep	2020	Sep-2020	metal	can pull
8498047		51.6465770029129/-3.29073179726949	GB	Tue Sep 29 2020	Sep	2020	Sep-2020	steelscrap
8498040		51.6466676508646/-3.29059128398753	GB	Tue Sep 29 2020	Sep	2020	Sep-2020	butt	cigarette
8498029		51.6468318244331/-3.2904872650907	GB	Tue Sep 29 2020	Sep	2020	Sep-2020	cigarette	butt
8498025		51.6466676508646/-3.29059128398753	GB	Tue Sep 29 2020	Sep	2020	Sep-2020	plastic	wrapper
8498011		51.6466681349819/-3.29058400268696	GB	Tue Sep 29 2020	Sep	2020	Sep-2020	plastic	facemask
8498010		51.6466884583983/-3.29057756844269	GB	Tue Sep 29 2020	Sep	2020	Sep-2020	cigarette	butt
8498009		51.6466924136209/-3.29055791354885	GB	Tue Sep 29 2020	Sep	2020	Sep-2020	cigarette	butt
8498006		51.6466831762235/-3.29056985480117	GB	Tue Sep 29 2020	Sep	2020	Sep-2020	cigarette	butt
8498004		51.6466826278275/-3.29057972369023	GB	Tue Sep 29 2020	Sep	2020	Sep-2020	butt	cigarette
8497992		51.6471252229599/-3.29087163893143	GB	Tue Sep 29 2020	Sep	2020	Sep-2020	cigarette	butt
8497990		51.646747953587/-3.29050664950505	GB	Tue Sep 29 2020	Sep	2020	Sep-2020	cigarette	butt
8497986		51.6467343028262/-3.29054137465891	GB	Tue Sep 29 2020	Sep	2020	Sep-2020	butt	cigarette
8497720		51.646653772109/-3.29034383135298	GB	Tue Sep 29 2020	Sep	2020	Sep-2020	butt	cigarette
8497719		51.64665250839/-3.29035000277038	GB	Tue Sep 29 2020	Sep	2020	Sep-2020	butt	cigarette
8497718		51.6467543691042/-3.29040278394818	GB	Tue Sep 29 2020	Sep	2020	Sep-2020	cigarette	butt
8497716		51.6467219442379/-3.2905245479562	GB	Tue Sep 29 2020	Sep	2020	Sep-2020	butt	cigarette
8497715		51.6466663259607/-3.29042502026308	GB	Tue Sep 29 2020	Sep	2020	Sep-2020	butt	cigarette
8497714		51.6467459555443/-3.29036712907356	GB	Tue Sep 29 2020	Sep	2020	Sep-2020	cigarette	butt
8497711		51.6471013466577/-3.29074574952194	GB	Tue Sep 29 2020	Sep	2020	Sep-2020	cigarette	butt
8497710		51.6466880511368/-3.29044049170598	GB	Tue Sep 29 2020	Sep	2020	Sep-2020	butt	cigarette
8497707		51.6467219415415/-3.29049421897439	GB	Tue Sep 29 2020	Sep	2020	Sep-2020	butt	cigarette
8497706		51.6467436486207/-3.29052248175609	GB	Tue Sep 29 2020	Sep	2020	Sep-2020	bottlecap	plastic
8497705		51.6466375393477/-3.2904999365281	GB	Tue Sep 29 2020	Sep	2020	Sep-2020	nitro oxide cartridge
8497704		51.6466474334977/-3.29040329970924	GB	Tue Sep 29 2020	Sep	2020	Sep-2020	butt	cigarette
8497703		51.6467624066133/-3.29028410413302	GB	Tue Sep 29 2020	Sep	2020	Sep-2020	cigarette	butt
8497702		51.6470153796051/-3.29078377853101	GB	Tue Sep 29 2020	Sep	2020	Sep-2020	butt	cigarette
8497592		51.6468105628895/-3.29024553465548	GB	Tue Sep 29 2020	Sep	2020	Sep-2020	cigarette	butt
8497576		51.6466199581866/-3.29035302275144	GB	Tue Sep 29 2020	Sep	2020	Sep-2020	cigarette	butt
8497562		51.6464626229701/-3.29039130832738	GB	Tue Sep 29 2020	Sep	2020	Sep-2020	butt	cigarette
8497508		51.6465726373207/-3.29028032397616	GB	Tue Sep 29 2020	Sep	2020	Sep-2020	cigarette	butt
8497500		51.646564543204/-3.29030527469636	GB	Tue Sep 29 2020	Sep	2020	Sep-2020	butt	cigarette
8497497		51.6471537968893/-3.29073997529929	GB	Tue Sep 29 2020	Sep	2020	Sep-2020	cigarette	butt
8497495		51.6465325297922/-3.2903486673618	GB	Tue Sep 29 2020	Sep	2020	Sep-2020	cigarette	butt
8497298		51.6468013735324/-3.29038956765519	GB	Tue Sep 29 2020	Sep	2020	Sep-2020	butt	cigarette
8496210		51.6471700737516/-3.29053270442767	GB	Tue Sep 29 2020	Sep	2020	Sep-2020	butt	cigarette
8496202		51.6467572076435/-3.29034098031286	GB	Tue Sep 29 2020	Sep	2020	Sep-2020	plastic	piece
8496198		51.6465996190641/-3.2903140449426	GB	Tue Sep 29 2020	Sep	2020	Sep-2020	cigarette	butt
8496097		51.6471194904669/-3.29076117257613	GB	Tue Sep 29 2020	Sep	2020	Sep-2020	butt	cigarette
8496084		51.6466126844502/-3.2902474179783	GB	Tue Sep 29 2020	Sep	2020	Sep-2020	piece	metal
8495914		51.6466553454754/-3.29016672212606	GB	Tue Sep 29 2020	Sep	2020	Sep-2020	butt	cigarette
8495902		51.6466920448128/-3.29014971475668	GB	Tue Sep 29 2020	Sep	2020	Sep-2020	butt	cigarette
8495892		51.6468909385223/-3.29028611018554	GB	Tue Sep 29 2020	Sep	2020	Sep-2020	butt	cigarette
8495891		51.6469137636136/-3.29037556638726	GB	Tue Sep 29 2020	Sep	2020	Sep-2020	butt	cigarette
8495879		55.0770529406658/-3.62427206710318	GB	Tue Sep 29 2020	Sep	2020	Sep-2020	latexglove
8495878		55.0775075331843/-3.62506667152385	GB	Tue Sep 29 2020	Sep	2020	Sep-2020	plastic
8495877		55.0772634940735/-3.62449360080401	GB	Tue Sep 29 2020	Sep	2020	Sep-2020	plastic
8495875		55.0773640769115/-3.62437290139834	GB	Tue Sep 29 2020	Sep	2020	Sep-2020	plastic
8495874		55.0773640769115/-3.62437290139834	GB	Tue Sep 29 2020	Sep	2020	Sep-2020	candy	bag
8495872		55.0773640769115/-3.62437290139834	GB	Tue Sep 29 2020	Sep	2020	Sep-2020	paper
8495871		55.0774430763489/-3.62421523779968	GB	Tue Sep 29 2020	Sep	2020	Sep-2020	plastic
8495870		55.0773966406054/-3.62421406433324	GB	Tue Sep 29 2020	Sep	2020	Sep-2020	bottlecap
8495869		55.0772148371256/-3.62399873324076	GB	Tue Sep 29 2020	Sep	2020	Sep-2020	plastic
8495867		55.077457870408/-3.62421431579033	GB	Tue Sep 29 2020	Sep	2020	Sep-2020	cigarette	butt
8495866		55.0774366222835/-3.62419579178432	GB	Tue Sep 29 2020	Sep	2020	Sep-2020	plastic
8495859		55.0774391368544/-3.6241936124895	GB	Tue Sep 29 2020	Sep	2020	Sep-2020	cigarette	butt
8495858		55.0774717424578/-3.62425832078198	GB	Tue Sep 29 2020	Sep	2020	Sep-2020	celluloseacetate
8495855		55.0774717424578/-3.62425832078198	GB	Tue Sep 29 2020	Sep	2020	Sep-2020	plastic
8495853		55.077457870408/-3.62421431579033	GB	Tue Sep 29 2020	Sep	2020	Sep-2020	cigarette	butt
8495852		55.0774717424578/-3.62425832078198	GB	Tue Sep 29 2020	Sep	2020	Sep-2020	wrapper
8495851		55.0774717424578/-3.62425832078198	GB	Tue Sep 29 2020	Sep	2020	Sep-2020	wrapper
8495850		55.0775074074558/-3.62429494969884	GB	Tue Sep 29 2020	Sep	2020	Sep-2020	plastic
8495847		55.0775889214641/-3.62393050454894	GB	Tue Sep 29 2020	Sep	2020	Sep-2020	plastic
8495846		51.6468212950139/-3.29006272126361	GB	Tue Sep 29 2020	Sep	2020	Sep-2020	butt	cigarette
8495845		55.076991940179/-3.62412497873458	GB	Tue Sep 29 2020	Sep	2020	Sep-2020	bottlecap
8495844		55.077618886768/-3.62391122617165	GB	Tue Sep 29 2020	Sep	2020	Sep-2020	plastic
8495829		55.077411644212/-3.62409177236596	GB	Tue Sep 29 2020	Sep	2020	Sep-2020	plastic
8495801		55.0776633108548/-3.6237274110351	GB	Tue Sep 29 2020	Sep	2020	Sep-2020	can
8495794		55.0776311243466/-3.62377225421707	GB	Tue Sep 29 2020	Sep	2020	Sep-2020	can
8495793		51.646837863603/-3.29014226361922	GB	Tue Sep 29 2020	Sep	2020	Sep-2020	butt	cigarette
8495790		51.646805884761/-3.29019729597539	GB	Tue Sep 29 2020	Sep	2020	Sep-2020	butt	cigarette
8495789		55.0775929028681/-3.62390971742908	GB	Tue Sep 29 2020	Sep	2020	Sep-2020	plastic
8495788		55.0776035478852/-3.62390217371622	GB	Tue Sep 29 2020	Sep	2020	Sep-2020	can
8495787		55.0776198506868/-3.62376990728418	GB	Tue Sep 29 2020	Sep	2020	Sep-2020	can
8495786		55.0776661187923/-3.62350998446683	GB	Tue Sep 29 2020	Sep	2020	Sep-2020	bottle
8495785		55.0776427332825/-3.62384886481205	GB	Tue Sep 29 2020	Sep	2020	Sep-2020	can
8495784		51.6470903169517/-3.29024324704186	GB	Tue Sep 29 2020	Sep	2020	Sep-2020	plastic	bottlecap
8495783		55.0776349381125/-3.62379563972691	GB	Tue Sep 29 2020	Sep	2020	Sep-2020	plastic
8495782		55.0776389195165/-3.62379387952725	GB	Tue Sep 29 2020	Sep	2020	Sep-2020	cup
8495781		55.0776338484651/-3.62378071993927	GB	Tue Sep 29 2020	Sep	2020	Sep-2020	cup
8495777		55.0770660164348/-3.62425354309718	GB	Tue Sep 29 2020	Sep	2020	Sep-2020	packet
8495756		55.07744730921/-3.62421129830519	GB	Tue Sep 29 2020	Sep	2020	Sep-2020	glass
8495635		51.6468825876489/-3.29026557391967	GB	Tue Sep 29 2020	Sep	2020	Sep-2020	butt	cigarette
8495634		51.6468243385996/-3.29018365831678	GB	Tue Sep 29 2020	Sep	2020	Sep-2020	butt	cigarette
8495544		51.6470930465089/-3.29047500742952	GB	Tue Sep 29 2020	Sep	2020	Sep-2020	butt	cigarette
8495140		51.6470690815061/-3.29073309122359	GB	Tue Sep 29 2020	Sep	2020	Sep-2020	butt	cigarette
8495094		51.6470681930044/-3.29012002630291	GB	Tue Sep 29 2020	Sep	2020	Sep-2020	butt	cigarette
8494938		51.6468954091772/-3.29014390084749	GB	Tue Sep 29 2020	Sep	2020	Sep-2020	rusty	nail
8494935		55.077408962003/-3.62418120727281	GB	Tue Sep 29 2020	Sep	2020	Sep-2020	plastic	bottle
8494934		55.0774193974725/-3.62419411540369	GB	Tue Sep 29 2020	Sep	2020	Sep-2020	plastic	cup
8494933		55.0774030527613/-3.62417366355995	GB	Tue Sep 29 2020	Sep	2020	Sep-2020	candy	wrapper
8494932		55.0774259353569/-3.62419595942239	GB	Tue Sep 29 2020	Sep	2020	Sep-2020	paper
8494931		55.0774030527613/-3.62417366355995	GB	Tue Sep 29 2020	Sep	2020	Sep-2020	plastic	bottle
8494926		55.0774030527613/-3.62417366355995	GB	Tue Sep 29 2020	Sep	2020	Sep-2020	can
8494925		55.0773989456287/-3.62417349592189	GB	Tue Sep 29 2020	Sep	2020	Sep-2020	cigarettepack
8494924		55.0774186431012/-3.62418556586245	GB	Tue Sep 29 2020	Sep	2020	Sep-2020	plastic	spoon
8494922		55.0774259353569/-3.62419595942239	GB	Tue Sep 29 2020	Sep	2020	Sep-2020	wrapper
8494921		55.0774569064892/-3.62426142208616	GB	Tue Sep 29 2020	Sep	2020	Sep-2020	paper
8494920		55.0774502009666/-3.62424063496629	GB	Tue Sep 29 2020	Sep	2020	Sep-2020	candy	wrapper
8494919		55.0774510391569/-3.62424650229851	GB	Tue Sep 29 2020	Sep	2020	Sep-2020	can
8494918		55.077459169603/-3.62428078428248	GB	Tue Sep 29 2020	Sep	2020	Sep-2020	can
8494917		55.0774569064892/-3.62426142208616	GB	Tue Sep 29 2020	Sep	2020	Sep-2020	can
8494916		55.0774579123175/-3.62427776679734	GB	Tue Sep 29 2020	Sep	2020	Sep-2020	wrapper
8494915		55.0774398912257/-3.62424876541237	GB	Tue Sep 29 2020	Sep	2020	Sep-2020	plastic
8494914		55.0774264382711/-3.62428204156796	GB	Tue Sep 29 2020	Sep	2020	Sep-2020	bottle
8494913		55.0774579123175/-3.62427776679734	GB	Tue Sep 29 2020	Sep	2020	Sep-2020	plastic
8494911		55.0775212795055/-3.62430098466913	GB	Tue Sep 29 2020	Sep	2020	Sep-2020	plastic	spoon
8494910		55.0771692395723/-3.62417508848349	GB	Tue Sep 29 2020	Sep	2020	Sep-2020	plastic
8494909		55.0774398912257/-3.62424876541237	GB	Tue Sep 29 2020	Sep	2020	Sep-2020	wrapper	candy
8494908		55.076991940179/-3.62412497873458	GB	Tue Sep 29 2020	Sep	2020	Sep-2020	plasticbottle
8494907		55.0774655398494/-3.62421473488549	GB	Tue Sep 29 2020	Sep	2020	Sep-2020	bottle
8494903		55.0771692395723/-3.62417508848349	GB	Tue Sep 29 2020	Sep	2020	Sep-2020	cigarettepack
8494891		55.0769916784193/-3.62412483750407	GB	Tue Sep 29 2020	Sep	2020	Sep-2020	plastic
8494873		55.0775614288217/-3.62439192831854	GB	Tue Sep 29 2020	Sep	2020	Sep-2020	cigarettepack
8494872		55.0771692395723/-3.62417508848349	GB	Tue Sep 29 2020	Sep	2020	Sep-2020	plastic
8494865		55.0769916784193/-3.62412483750407	GB	Tue Sep 29 2020	Sep	2020	Sep-2020	boot
8494864		55.0775165856397/-3.62438497133891	GB	Tue Sep 29 2020	Sep	2020	Sep-2020	plastic
8494862		55.0775460899389/-3.62425899133424	GB	Tue Sep 29 2020	Sep	2020	Sep-2020	plastic
8494859		55.0775292842231/-3.62440139986912	GB	Tue Sep 29 2020	Sep	2020	Sep-2020	plastic
8494856		55.0775223691529/-3.62439427525143	GB	Tue Sep 29 2020	Sep	2020	Sep-2020	plastic
8494850		55.0775448326534/-3.62422856502572	GB	Tue Sep 29 2020	Sep	2020	Sep-2020	can
8494847		55.0775217824197/-3.62428648397664	GB	Tue Sep 29 2020	Sep	2020	Sep-2020	plastic
8494844		55.0775134005165/-3.62437055446545	GB	Tue Sep 29 2020	Sep	2020	Sep-2020	paper
8494840		55.0775339780888/-3.62425672822038	GB	Tue Sep 29 2020	Sep	2020	Sep-2020	can
8494835		55.0775947468868/-3.62392287701706	GB	Tue Sep 29 2020	Sep	2020	Sep-2020	plastic
8494833		55.0775342714554/-3.62427257001738	GB	Tue Sep 29 2020	Sep	2020	Sep-2020	bottle	plastic
8494816		55.0776251312858/-3.62386956811289	GB	Tue Sep 29 2020	Sep	2020	Sep-2020	plastic
8494295		51.6468457041538/-3.29005131343806	GB	Tue Sep 29 2020	Sep	2020	Sep-2020	cigarette	butt
8494138		51.6470630954291/-3.29075555797721	GB	Tue Sep 29 2020	Sep	2020	Sep-2020	butt	cigarette
8493929		51.6469000613244/-3.2900178837599	GB	Tue Sep 29 2020	Sep	2020	Sep-2020	cigarette	butt
8493913		51.6469436680707/-3.29000582552474	GB	Tue Sep 29 2020	Sep	2020	Sep-2020	butt	cigarette
8493839		51.6468698409845/-3.29002326216428	GB	Tue Sep 29 2020	Sep	2020	Sep-2020	cigarette	butt
8493808		51.6471217360773/-3.29025625447512	GB	Tue Sep 29 2020	Sep	2020	Sep-2020	braces	cardboard	carton
8493737		54.66669113846/-5.65310234204461	GB	Tue Sep 29 2020	Sep	2020	Sep-2020	plastic	bottle	drink
8493734		54.6670808550479/-5.65312933177282	GB	Tue Sep 29 2020	Sep	2020	Sep-2020	plastic	piece	ball	dog
8493733		54.6668538731101/-5.65317124128868	GB	Tue Sep 29 2020	Sep	2020	Sep-2020	plastic	wetwipe
8493732		54.6679047961297/-5.65356577747097	GB	Tue Sep 29 2020	Sep	2020	Sep-2020	sweet	wrapper	plastic	dairymilk	cadburys	mondelezinternational
8493731		54.6669528633865/-5.65295490436782	GB	Tue Sep 29 2020	Sep	2020	Sep-2020	plastic	polystyrene	styrofoam	container	piece	food
8493730		54.6671233093875/-5.65304182470371	GB	Tue Sep 29 2020	Sep	2020	Sep-2020	plastic	packet	sweet
8493729		54.6671351697805/-5.65297393128802	GB	Tue Sep 29 2020	Sep	2020	Sep-2020	butt	cigarette	plastic	smoking
8493728		54.6670420887458/-5.65309949219753	GB	Tue Sep 29 2020	Sep	2020	Sep-2020	plastic	expandingfoam	piece
8493727		54.6664903196816/-5.65282664756217	GB	Tue Sep 29 2020	Sep	2020	Sep-2020	plastic	cup	drink
8493726		54.6679047961297/-5.65356577747097	GB	Tue Sep 29 2020	Sep	2020	Sep-2020	plastic	packet	bic	cristal	pen
8493725		54.6682337439197/-5.65377926454475	GB	Tue Sep 29 2020	Sep	2020	Sep-2020	plastic	packet	biscuit	sweet	richtea	mcvities	unitedbiscuits	pladis	yildiz
8493724		54.6683611131937/-5.65389419432569	GB	Tue Sep 29 2020	Sep	2020	Sep-2020	facemask	ppe	plastic
8493722		54.6687734546649/-5.65337089822223	GB	Tue Sep 29 2020	Sep	2020	Sep-2020	plastic	bottlecap
8493721		54.6682485379788/-5.65377851017346	GB	Tue Sep 29 2020	Sep	2020	Sep-2020	can	drink	metal	coke	cocacolacompany
8493720		54.6686147481013/-5.65276756128089	GB	Tue Sep 29 2020	Sep	2020	Sep-2020	plastic	bottle	drink	fruitshoot	robinsons	britvic
8493719		54.669257258116/-5.65353157930603	GB	Tue Sep 29 2020	Sep	2020	Sep-2020	plastic	cigarette	butt	smoking
8493718		54.6695036022502/-5.65373760648598	GB	Tue Sep 29 2020	Sep	2020	Sep-2020	plastic	cup	drink
8493717		54.6693971520799/-5.65363082103958	GB	Tue Sep 29 2020	Sep	2020	Sep-2020	plastic	wetwipe
8493716		54.6692540729928/-5.6535000633501	GB	Tue Sep 29 2020	Sep	2020	Sep-2020	plastic	drink	lid
8493715		54.6694361279296/-5.65365429036846	GB	Tue Sep 29 2020	Sep	2020	Sep-2020	cigarette	butt	plastic	smoking
8493713		54.6707284916701/-5.65530720167389	GB	Tue Sep 29 2020	Sep	2020	Sep-2020	plastic	fork	cutlery	food
8493712		54.6688296808162/-5.65462840758265	GB	Tue Sep 29 2020	Sep	2020	Sep-2020	plastic	wrapper	sweet	kinder	ferrero
8493711		54.6694572922351/-5.65363316797247	GB	Tue Sep 29 2020	Sep	2020	Sep-2020	plastic	wetwipe
8493709		54.6709068033562/-5.65563039024792	GB	Tue Sep 29 2020	Sep	2020	Sep-2020	plastic	sweet	wrapper	cadburys	wispa	mondelezinternational
8493708		54.6707462193954/-5.65534810536136	GB	Tue Sep 29 2020	Sep	2020	Sep-2020	plastic	sweet	wrapper	dairymilk	cadburys	mondelezinternational
8493702		54.6707173437389/-5.65630515106549	GB	Tue Sep 29 2020	Sep	2020	Sep-2020	plastic	sachet	tomatoketchup	heinz	kraftheinz	food	sauce
8493696		54.6707554394888/-5.65603022464146	GB	Tue Sep 29 2020	Sep	2020	Sep-2020	plastic	lid	drink
8493695		54.6706416726303/-5.65674638294705	GB	Tue Sep 29 2020	Sep	2020	Sep-2020	plastic	spoon	sweet
8493693		54.6701355977493/-5.65680873580804	GB	Tue Sep 29 2020	Sep	2020	Sep-2020	wood	paintbrush
8493692		54.6702223085376/-5.65648687072625	GB	Tue Sep 29 2020	Sep	2020	Sep-2020	plastic	wetwipe	majestic	wrapper
8493691		54.6702334564688/-5.65666498616865	GB	Tue Sep 29 2020	Sep	2020	Sep-2020	plastic	ring	jewellery
8493690		54.6701404592531/-5.6566122639977	GB	Tue Sep 29 2020	Sep	2020	Sep-2020	plastic	cottonbud	stick
8493689		54.6701298980551/-5.65690998919835	GB	Tue Sep 29 2020	Sep	2020	Sep-2020	plastic	wrapper	sweet	daim	mondelezinternational
8493688		54.6701132180678/-5.65689465031555	GB	Tue Sep 29 2020	Sep	2020	Sep-2020	plastic	bottlecap
8493685		54.6701234858992/-5.65685668029418	GB	Tue Sep 29 2020	Sep	2020	Sep-2020	plastic	polystyrene	piece
8493675		54.6701104520398/-5.65701618791153	GB	Tue Sep 29 2020	Sep	2020	Sep-2020	plastic	polystyrene	styrofoam	container	piece	food
8493667		54.6700467914852/-5.65699774772456	GB	Tue Sep 29 2020	Sep	2020	Sep-2020	plastic	polystyrene	styrofoam	container	piece	food
8493666		54.6700700512665/-5.6569957360678	GB	Tue Sep 29 2020	Sep	2020	Sep-2020	plastic	piece	rope
8493664		54.6700854739683/-5.65701115876963	GB	Tue Sep 29 2020	Sep	2020	Sep-2020	plastic	sweet	wrapper	lollipop	chupachups	perfettivanmelle
8493662		54.6698473860087/-5.65773912706008	GB	Tue Sep 29 2020	Sep	2020	Sep-2020	plastic	wrapper	sweet	greenandblacks	cadburys	mondelezinternational
8493661		54.6698364476251/-5.65777114593019	GB	Tue Sep 29 2020	Sep	2020	Sep-2020	plastic	bottlecap	drink
8493659		54.6700224420565/-5.65703295171788	GB	Tue Sep 29 2020	Sep	2020	Sep-2020	plastic	piece
8493657		54.6698349388825/-5.6578123848938	GB	Tue Sep 29 2020	Sep	2020	Sep-2020	plastic	polystyrene	styrofoam	piece
8493655		54.6698447037997/-5.65785991028478	GB	Tue Sep 29 2020	Sep	2020	Sep-2020	plastic	glassprotectionpad
8493654		54.6697998187082/-5.65804431215456	GB	Tue Sep 29 2020	Sep	2020	Sep-2020	plastic	piece
8493653		54.6698552230882/-5.65794708207777	GB	Tue Sep 29 2020	Sep	2020	Sep-2020	plastic	bottlecap	drink
8493644		54.6697775228458/-5.65804573707809	GB	Tue Sep 29 2020	Sep	2020	Sep-2020	plastic	piece	firework	fireworkcasing
8493639		54.6698834281924/-5.65783870406976	GB	Tue Sep 29 2020	Sep	2020	Sep-2020	plastic	expandingfoam	piece
8493637		54.6697530895981/-5.65815377980998	GB	Tue Sep 29 2020	Sep	2020	Sep-2020	plastic	facemask	ppe
8493635		54.6698712325233/-5.6582666840457	GB	Tue Sep 29 2020	Sep	2020	Sep-2020	plastic	sweet	wrapper	twirl	cadburys	mondelezinternational
8493634		54.6698906785386/-5.65823600628009	GB	Tue Sep 29 2020	Sep	2020	Sep-2020	can	metal	drink	alcohol	energydrink	corinthianbrandsltd	dragonsoop
8493631		54.6698225336658/-5.65829132684102	GB	Tue Sep 29 2020	Sep	2020	Sep-2020	plastic	wrapper	sweet	twix	marsincorporated
8493617		54.6699191350999/-5.6581662688457	GB	Tue Sep 29 2020	Sep	2020	Sep-2020	plastic	polystyrene	piece
8493616		54.6699210210281/-5.65824254416456	GB	Tue Sep 29 2020	Sep	2020	Sep-2020	plastic	polystyrene	styrofoam	container	piece	food
8493615		54.6698618867012/-5.65832032822599	GB	Tue Sep 29 2020	Sep	2020	Sep-2020	plastic	packet	piece	snack
8493614		54.6698003216224/-5.65817330964437	GB	Tue Sep 29 2020	Sep	2020	Sep-2020	plastic	lid	drink
8493613		54.6699081548067/-5.65836114809444	GB	Tue Sep 29 2020	Sep	2020	Sep-2020	plastic	piece
8493612		54.6698016627269/-5.65821915865471	GB	Tue Sep 29 2020	Sep	2020	Sep-2020	plastic	polystyrene	styrofoam	piece	container	food
8493611		54.669851954146/-5.65831362270346	GB	Tue Sep 29 2020	Sep	2020	Sep-2020	plastic	bottlecap	drink
8493609		54.6698604617777/-5.65825360827675	GB	Tue Sep 29 2020	Sep	2020	Sep-2020	plastic	wrapper	sweet	mcvities	unitedbiscuits	pladis	yildiz	piece
8493608		54.669811008549/-5.65819602460196	GB	Tue Sep 29 2020	Sep	2020	Sep-2020	plastic	sweet	wrapper	dairymilk	cadburys	mondelezinternational	piece
8493607		54.6698361542585/-5.65810658969512	GB	Tue Sep 29 2020	Sep	2020	Sep-2020	plastic	piece
8493606		54.66943085224/-5.65861359035901	GB	Tue Sep 29 2020	Sep	2020	Sep-2020	plastic	lid	drink
8493604		54.6695744576458/-5.65860785428932	GB	Tue Sep 29 2020	Sep	2020	Sep-2020	bottle	glass	drink	alcohol	stellaartois	anheuserbusch
8493602		54.6695595514538/-5.65861034207573	GB	Tue Sep 29 2020	Sep	2020	Sep-2020	plastic	polystyrene	styrofoam	container	piece	food
8493601		54.6692541568118/-5.65925046802094	GB	Tue Sep 29 2020	Sep	2020	Sep-2020	plastic	polystyrene	styrofoam	container	piece	food
8493600		54.6695634667982/-5.65807145594886	GB	Tue Sep 29 2020	Sep	2020	Sep-2020	plastic	piece	nerf	toy	bullet
8493599		54.6692541568118/-5.65925046802094	GB	Tue Sep 29 2020	Sep	2020	Sep-2020	plastic	tilespacer
8493598		54.6692568809303/-5.65929564647904	GB	Tue Sep 29 2020	Sep	2020	Sep-2020	plastic	polystyrene	piece
8493597		54.6692405362191/-5.65931492485633	GB	Tue Sep 29 2020	Sep	2020	Sep-2020	plastic	bottlering	notcut
8493596		54.6692583896729/-5.65931727178922	GB	Tue Sep 29 2020	Sep	2020	Sep-2020	plastic	piece
8493594		54.6691299789163/-5.65932598896852	GB	Tue Sep 29 2020	Sep	2020	Sep-2020	plastic	polystyrene	styrofoam	container	piece	food
8493593		54.6692986228081/-5.65935172141125	GB	Tue Sep 29 2020	Sep	2020	Sep-2020	plastic	sweet	wrapper	fruitypops	swizzels	swizzelsmatlow	lollipop
8493592		54.6692424221473/-5.65927385353079	GB	Tue Sep 29 2020	Sep	2020	Sep-2020	plastic	stick	cottonbud
8493591		54.6691797255116/-5.65930763260057	GB	Tue Sep 29 2020	Sep	2020	Sep-2020	plastic	expandingfoam	piece
8493590		51.6468239521422/-3.29010367902469	GB	Tue Sep 29 2020	Sep	2020	Sep-2020	butt	cigarette
8493587		54.669226957536/-5.65944467671743	GB	Tue Sep 29 2020	Sep	2020	Sep-2020	plastic	sweet	wrapper	werthersoriginal	werthers	auguststorck
8493585		54.6692255326125/-5.65946043469539	GB	Tue Sep 29 2020	Sep	2020	Sep-2020	plastic	facemask	ppe
8493581		54.6691850480201/-5.65959739499321	GB	Tue Sep 29 2020	Sep	2020	Sep-2020	plastic	piece
8493579		54.6692201681944/-5.6596565712296	GB	Tue Sep 29 2020	Sep	2020	Sep-2020	plastic	biofilter
8493578		54.6691552084448/-5.65961977467468	GB	Tue Sep 29 2020	Sep	2020	Sep-2020	plastic	piece
8493576		54.669305034964/-5.65961709246566	GB	Tue Sep 29 2020	Sep	2020	Sep-2020	plastic	facemask	ppe
8493575		54.6691723494368/-5.65959705971708	GB	Tue Sep 29 2020	Sep	2020	Sep-2020	plastic	balloon
8493574		54.6691637579861/-5.6596306711488	GB	Tue Sep 29 2020	Sep	2020	Sep-2020	plastic	strappingband
8493573		54.6689851868065/-5.65972842976363	GB	Tue Sep 29 2020	Sep	2020	Sep-2020	plastic	balloon
8493572		54.6692279633644/-5.65953796729973	GB	Tue Sep 29 2020	Sep	2020	Sep-2020	plastic	drink	cup
8493571		54.6692425897854/-5.65954140388003	GB	Tue Sep 29 2020	Sep	2020	Sep-2020	plastic	lid
8493570		54.6691744868221/-5.65959043801358	GB	Tue Sep 29 2020	Sep	2020	Sep-2020	plastic	piece
8493564		54.6691895323383/-5.65946906805565	GB	Tue Sep 29 2020	Sep	2020	Sep-2020	plastic	facemask	ppe
8493563		54.6692028595644/-5.65955196507802	GB	Tue Sep 29 2020	Sep	2020	Sep-2020	plastic	sweet	wrapper	dairymilk	mondelezinternational	cadburys
8493562		54.6692041168498/-5.65953746438553	GB	Tue Sep 29 2020	Sep	2020	Sep-2020	plastic	bottle	drink
8493561		54.6692088526251/-5.6596343591862	GB	Tue Sep 29 2020	Sep	2020	Sep-2020	plastic	bottlering	notcut
8493560		54.6691368939864/-5.6596859078907	GB	Tue Sep 29 2020	Sep	2020	Sep-2020	plastic	bottlecap
8493559		54.6692289272832/-5.65949521959355	GB	Tue Sep 29 2020	Sep	2020	Sep-2020	plastic	bottlecap	drink
8493557		54.6680932632225/-5.66121065989664	GB	Tue Sep 29 2020	Sep	2020	Sep-2020	plastic	straw	drink
8493556		54.6691931365567/-5.65961382352343	GB	Tue Sep 29 2020	Sep	2020	Sep-2020	plastic	piece	polystyrene	styrofoam
8493552		54.6691960283133/-5.6596396397852	GB	Tue Sep 29 2020	Sep	2020	Sep-2020	plastic	piece	rope
8493550		54.6689723519836/-5.65965645503003	GB	Tue Sep 29 2020	Sep	2020	Sep-2020	plastic	container	food
8493546		54.6681722626599/-5.6611796468549	GB	Tue Sep 29 2020	Sep	2020	Sep-2020	plastic	bottlering	notcut
8493544		54.6681915410372/-5.66118610092035	GB	Tue Sep 29 2020	Sep	2020	Sep-2020	plastic	biofilter
8493539		54.6681493381547/-5.66117822193137	GB	Tue Sep 29 2020	Sep	2020	Sep-2020	plastic	firework	fireworkcasing
8493536		54.6682044910776/-5.66115844063988	GB	Tue Sep 29 2020	Sep	2020	Sep-2020	plastic	drink	drinklabel	piece
8493535		54.668193552694/-5.66121644340983	GB	Tue Sep 29 2020	Sep	2020	Sep-2020	plastic	cup	drink
8493534		54.6682010125878/-5.66118241288295	GB	Tue Sep 29 2020	Sep	2020	Sep-2020	plastic	sauce	pot	food	mcdonalds
8493533		54.6681627491998/-5.66110764630666	GB	Tue Sep 29 2020	Sep	2020	Sep-2020	plastic	artificialplant
8493532		54.6681640903043/-5.66132532433203	GB	Tue Sep 29 2020	Sep	2020	Sep-2020	plastic	bottlecap	drink	oranginaschweppes	cocacolacompany
8493531		54.668161952919/-5.66115223803153	GB	Tue Sep 29 2020	Sep	2020	Sep-2020	cup	drink	plastic
8493530		54.6681476617741/-5.661134971311	GB	Tue Sep 29 2020	Sep	2020	Sep-2020	plastic	drinklabel	drink	water	aquapura	princesgroup
8493528		54.6681594383481/-5.66114293411901	GB	Tue Sep 29 2020	Sep	2020	Sep-2020	plastic	bottlecap	drink
8493526		54.6682062512773/-5.66117897630265	GB	Tue Sep 29 2020	Sep	2020	Sep-2020	plastic	bottle	drink
8493525		54.6682175668466/-5.66119666211834	GB	Tue Sep 29 2020	Sep	2020	Sep-2020	plastic	toiletfreshener	piece
8493524		54.6682175668466/-5.66119666211834	GB	Tue Sep 29 2020	Sep	2020	Sep-2020	plastic	wrapper	sweet	milkyway	marsincorporated
8493523		54.6681738552215/-5.66119758412769	GB	Tue Sep 29 2020	Sep	2020	Sep-2020	piece	plastic	packet	biscuit	hobnobs	mcvities	unitedbiscuits	pladis	yildiz
8493521		54.6682155132803/-5.66121049225858	GB	Tue Sep 29 2020	Sep	2020	Sep-2020	plastic	sweet	wrapper	twix	marsincorporated
8493520		54.6681958577173/-5.66123756580582	GB	Tue Sep 29 2020	Sep	2020	Sep-2020	plastic	drinklabel	drink	milk	dalefarm
8493519		54.6681068419057/-5.66128408536842	GB	Tue Sep 29 2020	Sep	2020	Sep-2020	plastic	bottlecap
8493518		54.6681929659607/-5.66125634126892	GB	Tue Sep 29 2020	Sep	2020	Sep-2020	plastic	tub	sweet	icecream	nugelato
8493517		54.6681541996586/-5.66145021468928	GB	Tue Sep 29 2020	Sep	2020	Sep-2020	plastic	fishingfloat
8493515		54.668118241294/-5.6612647231721	GB	Tue Sep 29 2020	Sep	2020	Sep-2020	plastic	polystyrene	piece
8493513		54.6681704605507/-5.66131828353336	GB	Tue Sep 29 2020	Sep	2020	Sep-2020	plastic	fishingfloat
8493512		54.6681789262729/-5.66138659604421	GB	Tue Sep 29 2020	Sep	2020	Sep-2020	plastic	sweet	wrapper	dairymilk	cadburys	mondelezinternational
8493511		54.6681501753696/-5.66137158686227	GB	Tue Sep 29 2020	Sep	2020	Sep-2020	plastic	wrapper	sweet	cadburys	roses	mondelezinternational
8493510		54.6680700316664/-5.66123085529315	GB	Tue Sep 29 2020	Sep	2020	Sep-2020	plastic	polystyrene	styrofoam	piece	food	container
8493507		54.6681439318272/-5.66122105345657	GB	Tue Sep 29 2020	Sep	2020	Sep-2020	plastic	packet	snack	piece
8493497		54.6681260783734/-5.66136312671533	GB	Tue Sep 29 2020	Sep	2020	Sep-2020	plastic	straw	drink
8493493		54.6681352984669/-5.66145096906057	GB	Tue Sep 29 2020	Sep	2020	Sep-2020	plastic	sweet	wrapper	piece	maoam	haribo
8493489		54.668134250729/-5.66144384444287	GB	Tue Sep 29 2020	Sep	2020	Sep-2020	plastic	balloon	piece
8493487		54.6680412954229/-5.66134124994805	GB	Tue Sep 29 2020	Sep	2020	Sep-2020	plastic	carrierbag	bagforlife	asda
8493481		54.6679608325471/-5.66162432429206	GB	Tue Sep 29 2020	Sep	2020	Sep-2020	packet	plastic	snack	doritos	fritolay	pepsico
8493477		54.6680606157097/-5.66136731766692	GB	Tue Sep 29 2020	Sep	2020	Sep-2020	plastic	sweet	wrapper	galaxy	marsincorporated
8493473		54.668054790287/-5.6613976601564	GB	Tue Sep 29 2020	Sep	2020	Sep-2020	plastic	piece
8493466		54.668071931279/-5.6614214647614	GB	Tue Sep 29 2020	Sep	2020	Sep-2020	plastic	piping	foam
8493464		54.6679422456481/-5.6615228840158	GB	Tue Sep 29 2020	Sep	2020	Sep-2020	plastic	sweet	packet	piece
8493457		54.6678266348826/-5.66186444834402	GB	Tue Sep 29 2020	Sep	2020	Sep-2020	plastic	bottlecap	drink
8493452		54.6665493817747/-5.66352492820061	GB	Tue Sep 29 2020	Sep	2020	Sep-2020	can	alcohol	drink	heineken	metal	heinekeninternational
8493451		54.6663102647799/-5.66460700706175	GB	Tue Sep 29 2020	Sep	2020	Sep-2020	plastic	ball
8493444		54.6677742060783/-5.66211372614434	GB	Tue Sep 29 2020	Sep	2020	Sep-2020	plastic	carrierbag
8493438		54.6662293375048/-5.66493256018093	GB	Tue Sep 29 2020	Sep	2020	Sep-2020	plastic	bottle	drink	energydrink	lucozadeenergy	suntory
8493437		54.6662969375538/-5.66491479054621	GB	Tue Sep 29 2020	Sep	2020	Sep-2020	plastic	sweet	wrapper	kinder	ferrero
8493434		54.6664079397609/-5.66399715378405	GB	Tue Sep 29 2020	Sep	2020	Sep-2020	plastic	polystyrene	styrofoam	container	piece	food
8493430		54.6661761543291/-5.66509173252216	GB	Tue Sep 29 2020	Sep	2020	Sep-2020	plastic	cutlery	fork	broken
8493429		54.6662383061411/-5.66493817605606	GB	Tue Sep 29 2020	Sep	2020	Sep-2020	plastic	carton	drink	milk	tesco	tetrapak
8493426		54.6661716281014/-5.6650947500073	GB	Tue Sep 29 2020	Sep	2020	Sep-2020	plastic	cutlery	fork	broken
8493424		54.6661761543291/-5.66509173252216	GB	Tue Sep 29 2020	Sep	2020	Sep-2020	plastic	cutlery	fork	broken
8493406		54.6657088033317/-5.6674079098009	GB	Tue Sep 29 2020	Sep	2020	Sep-2020	brownformancorporation	jackdaniels	drink	alcohol	can	metal
8493405		54.6658223093988/-5.66749395309431	GB	Tue Sep 29 2020	Sep	2020	Sep-2020	plastic	bottle	piece
8493404		54.663353250541/-5.66965361155491	GB	Tue Sep 29 2020	Sep	2020	Sep-2020	plastic	spoon	cutlery	sweet
8493399		54.6663908986884/-5.66613041796318	GB	Tue Sep 29 2020	Sep	2020	Sep-2020	can	cocacola	drink	metal	cocacolacompany
8493397		54.6663951315495/-5.6661170069181	GB	Tue Sep 29 2020	Sep	2020	Sep-2020	plastic	polystyrene	styrofoam	container	piece	food
8493392		54.6664017113435/-5.66637156531742	GB	Tue Sep 29 2020	Sep	2020	Sep-2020	can	metal	drink	alcohol	budweiser	anheuserbusch
8493386		54.6664009150627/-5.6663712300413	GB	Tue Sep 29 2020	Sep	2020	Sep-2020	plastic	drinklabel	drink	cocacola	cocacolacompany
8493375		54.6659384435552/-5.66773605533472	GB	Tue Sep 29 2020	Sep	2020	Sep-2020	plastic	glassprotectionpad
8493370		54.6659554588186/-5.66775357351235	GB	Tue Sep 29 2020	Sep	2020	Sep-2020	plastic	ring	miscellaneous
8493369		54.6659268346193/-5.66776036285392	GB	Tue Sep 29 2020	Sep	2020	Sep-2020	plastic	piece
8493361		54.6659175726163/-5.66765047610334	GB	Tue Sep 29 2020	Sep	2020	Sep-2020	plastic	ball	dog
8493358		54.6648969082671/-5.66753949970535	GB	Tue Sep 29 2020	Sep	2020	Sep-2020	wetwipe	plastic
8493351		54.6658793511378/-5.6676004361414	GB	Tue Sep 29 2020	Sep	2020	Sep-2020	plastic	packet	snack
8493350		51.6468307591024/-3.29019034794452	GB	Tue Sep 29 2020	Sep	2020	Sep-2020	butt	cigarette
8493349		51.6468618842644/-3.29010433725399	GB	Tue Sep 29 2020	Sep	2020	Sep-2020	cigarette	butt
8493348		51.6468998498545/-3.29012024784767	GB	Tue Sep 29 2020	Sep	2020	Sep-2020	butt	cigarette
8493345		51.6468036705731/-3.29006518007467	GB	Tue Sep 29 2020	Sep	2020	Sep-2020	plastic	straw	wrapper
8493342		51.6473460509117/-3.29003083511712	GB	Tue Sep 29 2020	Sep	2020	Sep-2020	plastic	wrapper
8493328		51.6468279694717/-3.29040210583352	GB	Tue Sep 29 2020	Sep	2020	Sep-2020	butt	cigarette
8493165		51.647330244987/-3.29074056527422	GB	Tue Sep 29 2020	Sep	2020	Sep-2020	piece	plastic
8493164		51.6467390968195/-3.29027158031699	GB	Tue Sep 29 2020	Sep	2020	Sep-2020	piece	plastic
8493161		51.6466848559686/-3.29016318452297	GB	Tue Sep 29 2020	Sep	2020	Sep-2020	cigarette	butt
8493126		51.6467459054491/-3.29024526737366	GB	Tue Sep 29 2020	Sep	2020	Sep-2020	cigarette	butt
8493125		51.6466940186612/-3.2901809282372	GB	Tue Sep 29 2020	Sep	2020	Sep-2020	butt	cigarette
8493124		51.6466827549331/-3.29025370782093	GB	Tue Sep 29 2020	Sep	2020	Sep-2020	cigarette	butt
8493122		51.6467340124514/-3.29019249351451	GB	Tue Sep 29 2020	Sep	2020	Sep-2020	cigarette	butt
8493120		51.6467038773669/-3.29022834661422	GB	Tue Sep 29 2020	Sep	2020	Sep-2020	butt	cigarette
8493119		51.6467340124514/-3.29019249351451	GB	Tue Sep 29 2020	Sep	2020	Sep-2020	butt	cigarette
8490025		53.8125000695804/-1.48131081851834	GB	Tue Sep 29 2020	Sep	2020	Sep-2020	ppe	disposableglove
8488588		50.57471333/-2.46473333	GB	Tue Sep 29 2020	Sep	2020	Sep-2020	plastic
8488587		50.57471333/-2.46473333	GB	Tue Sep 29 2020	Sep	2020	Sep-2020	plastic
8488586		50.574755/-2.46479667	GB	Tue Sep 29 2020	Sep	2020	Sep-2020	nylon rope
8488585		50.57508/-2.465	GB	Tue Sep 29 2020	Sep	2020	Sep-2020	plastic
8488583		50.575455/-2.46518667	GB	Tue Sep 29 2020	Sep	2020	Sep-2020	foam
8488582		50.575455/-2.46518667	GB	Tue Sep 29 2020	Sep	2020	Sep-2020	lightbulb
8488581		50.57582833/-2.46526333	GB	Tue Sep 29 2020	Sep	2020	Sep-2020	metal
8488580		50.57567167/-2.465255	GB	Tue Sep 29 2020	Sep	2020	Sep-2020	wrapper
8488579		50.57583333/-2.46532167	GB	Tue Sep 29 2020	Sep	2020	Sep-2020	plastic
8488578		50.57585333/-2.46537167	GB	Tue Sep 29 2020	Sep	2020	Sep-2020	plastic
8488577		50.57576333/-2.46528	GB	Tue Sep 29 2020	Sep	2020	Sep-2020	rubber	shoe
8488576		50.5783/-2.467055	GB	Tue Sep 29 2020	Sep	2020	Sep-2020	nylon rope
8488574		50.57452833/-2.46731333	GB	Tue Sep 29 2020	Sep	2020	Sep-2020	nylon rope
8488573		50.57457833/-2.46726333	GB	Tue Sep 29 2020	Sep	2020	Sep-2020	plastic
8488572		50.57464667/-2.46704167	GB	Tue Sep 29 2020	Sep	2020	Sep-2020	nylon rope
8488571		50.57452833/-2.46731667	GB	Tue Sep 29 2020	Sep	2020	Sep-2020	nylon rope
8488570		50.57452833/-2.46731667	GB	Tue Sep 29 2020	Sep	2020	Sep-2020	fishingline
8488569		50.57432167/-2.46788	GB	Tue Sep 29 2020	Sep	2020	Sep-2020	nylon rope
8488568		50.57417167/-2.46775333	GB	Tue Sep 29 2020	Sep	2020	Sep-2020	nylon rope
8488567		50.57500833/-2.467095	GB	Tue Sep 29 2020	Sep	2020	Sep-2020	plastic
8488566		50.57417167/-2.467755	GB	Tue Sep 29 2020	Sep	2020	Sep-2020	rope
8488564		50.57503/-2.46709667	GB	Tue Sep 29 2020	Sep	2020	Sep-2020	plastic
8488562		50.57417833/-2.46776667	GB	Tue Sep 29 2020	Sep	2020	Sep-2020	polystyrene
8488561		50.57417167/-2.46775	GB	Tue Sep 29 2020	Sep	2020	Sep-2020	plastic
8488560		50.57503/-2.46709667	GB	Tue Sep 29 2020	Sep	2020	Sep-2020	plastic
8488559		50.57417167/-2.46775333	GB	Tue Sep 29 2020	Sep	2020	Sep-2020	nylon rope
8488558		50.57413/-2.467695	GB	Tue Sep 29 2020	Sep	2020	Sep-2020	aluminium	can
8488557		50.574245/-2.46770333	GB	Tue Sep 29 2020	Sep	2020	Sep-2020	metal
8488556		50.57417833/-2.46769167	GB	Tue Sep 29 2020	Sep	2020	Sep-2020	nylon rope
8488555		50.57414667/-2.46768833	GB	Tue Sep 29 2020	Sep	2020	Sep-2020	plastic
8488554		50.57425333/-2.46769667	GB	Tue Sep 29 2020	Sep	2020	Sep-2020	rubber
8488553		50.57482167/-2.46716333	GB	Tue Sep 29 2020	Sep	2020	Sep-2020	plastic
8488552		50.57498667/-2.46714167	GB	Tue Sep 29 2020	Sep	2020	Sep-2020	plastic
8488551		50.57503/-2.46709667	GB	Tue Sep 29 2020	Sep	2020	Sep-2020	polystyrene
8488550		50.57503/-2.46709667	GB	Tue Sep 29 2020	Sep	2020	Sep-2020	plastic
8488549		50.57577833/-2.46696333	GB	Tue Sep 29 2020	Sep	2020	Sep-2020	rubber	ball
8487703		53.7924929080273/-1.46909976732732	GB	Tue Sep 29 2020	Sep	2020	Sep-2020	ppe	facemask
8486152		53.7846253578829/-1.45982032241787	GB	Tue Sep 29 2020	Sep	2020	Sep-2020	ppe	facemask
8486118		53.7875512720832/-1.47551793950431	GB	Tue Sep 29 2020	Sep	2020	Sep-2020	ppe	facemask
8485873		53.7878485405373/-1.4828119915684	GB	Tue Sep 29 2020	Sep	2020	Sep-2020	ppe	facemask
8485872		53.7883374257715/-1.48242780862006	GB	Tue Sep 29 2020	Sep	2020	Sep-2020	ppe	facemask
8485739		53.7880288552627/-1.48270266883329	GB	Tue Sep 29 2020	Sep	2020	Sep-2020	ppe	facemask
8485720		53.7881664939248/-1.48256735921797	GB	Tue Sep 29 2020	Sep	2020	Sep-2020	ppe	facemask
8485719		53.788098340719/-1.4825957854756	GB	Tue Sep 29 2020	Sep	2020	Sep-2020	ppe	facemask
8485718		53.7880155066635/-1.4826201744068	GB	Tue Sep 29 2020	Sep	2020	Sep-2020	ppe	facemask
8485717		53.7881017744314/-1.48282158589775	GB	Tue Sep 29 2020	Sep	2020	Sep-2020	ppe	facemask
8485716		53.7879341658174/-1.48303736654887	GB	Tue Sep 29 2020	Sep	2020	Sep-2020	ppe	facemask
8485711		53.788242033444/-1.48265741996617	GB	Tue Sep 29 2020	Sep	2020	Sep-2020	ppe	facemask
8485704		53.788278946568/-1.48271779438115	GB	Tue Sep 29 2020	Sep	2020	Sep-2020	ppe	facemask
8485699		53.7886337836551/-1.4828346485627	GB	Tue Sep 29 2020	Sep	2020	Sep-2020	ppe	facemask
8485541		53.7886310520296/-1.48259988767437	GB	Tue Sep 29 2020	Sep	2020	Sep-2020	ppe	facemask
8485540		53.7887103727278/-1.48261517635678	GB	Tue Sep 29 2020	Sep	2020	Sep-2020	ppe	facemask
8485524		53.7890667708548/-1.48298090198853	GB	Tue Sep 29 2020	Sep	2020	Sep-2020	ppe	facemask
8485511		55.077638793788/-3.62376688979904	GB	Tue Sep 29 2020	Sep	2020	Sep-2020	wrapper
8485510		55.0775945792488/-3.62391667440871	GB	Tue Sep 29 2020	Sep	2020	Sep-2020	plastic
8485509		55.0776614249266/-3.62364459783176	GB	Tue Sep 29 2020	Sep	2020	Sep-2020	can
8485508		55.0776661187923/-3.62350998446683	GB	Tue Sep 29 2020	Sep	2020	Sep-2020	plastic
8485506		55.0776623888454/-3.62351694144646	GB	Tue Sep 29 2020	Sep	2020	Sep-2020	plastic
8485505		55.0776570663369/-3.62355792895297	GB	Tue Sep 29 2020	Sep	2020	Sep-2020	can
8485504		55.0776762608952/-3.62354351207951	GB	Tue Sep 29 2020	Sep	2020	Sep-2020	plastic
8485503		55.0776382908738/-3.62350487150589	GB	Tue Sep 29 2020	Sep	2020	Sep-2020	plastic	bottle
8485502		55.0776359858504/-3.62348701805214	GB	Tue Sep 29 2020	Sep	2020	Sep-2020	plastic
8485501		55.0782153010881/-3.61921953969041	GB	Tue Sep 29 2020	Sep	2020	Sep-2020	plastic
8485500		55.0785437521145/-3.61964161116737	GB	Tue Sep 29 2020	Sep	2020	Sep-2020	plastic
8485499		55.0776694889562/-3.62369476404066	GB	Tue Sep 29 2020	Sep	2020	Sep-2020	plastic	wrapper
8485498		55.0785787823192/-3.61976360902527	GB	Tue Sep 29 2020	Sep	2020	Sep-2020	plastic
8485497		55.0783155067405/-3.61926387995819	GB	Tue Sep 29 2020	Sep	2020	Sep-2020	plastic
8485496		55.078265173412/-3.61934560351411	GB	Tue Sep 29 2020	Sep	2020	Sep-2020	food
8485495		55.0781271653763/-3.61897897906938	GB	Tue Sep 29 2020	Sep	2020	Sep-2020	plastic
8485493		55.0782218389726/-3.61928097904066	GB	Tue Sep 29 2020	Sep	2020	Sep-2020	paper
8485492		55.0779118558849/-3.61872082986773	GB	Tue Sep 29 2020	Sep	2020	Sep-2020	plastic
8485491		55.0781879760838/-3.61913538538257	GB	Tue Sep 29 2020	Sep	2020	Sep-2020	can
8485490		55.0784494076437/-3.61903765239159	GB	Tue Sep 29 2020	Sep	2020	Sep-2020	paper
8485487		55.0785615575081/-3.61903522163967	GB	Tue Sep 29 2020	Sep	2020	Sep-2020	facemask
8485486		55.0786579913041/-3.61912105232814	GB	Tue Sep 29 2020	Sep	2020	Sep-2020	plastic
8485484		55.0792464009068/-3.61944015138188	GB	Tue Sep 29 2020	Sep	2020	Sep-2020	plastic
8485482		55.079257465019/-3.61951299012044	GB	Tue Sep 29 2020	Sep	2020	Sep-2020	can
8485481		55.078703798405/-3.61913848668674	GB	Tue Sep 29 2020	Sep	2020	Sep-2020	plastic
8485479		55.0787421875215/-3.61917746253649	GB	Tue Sep 29 2020	Sep	2020	Sep-2020	plastic
8485478		55.0787913892931/-3.61902558245102	GB	Tue Sep 29 2020	Sep	2020	Sep-2020	plastic
8485477		55.078796502254/-3.61908794381061	GB	Tue Sep 29 2020	Sep	2020	Sep-2020	plastic
8485476		55.0787607953465/-3.61904301680962	GB	Tue Sep 29 2020	Sep	2020	Sep-2020	piece	plastic
8485475		55.0792625360704/-3.61949983053246	GB	Tue Sep 29 2020	Sep	2020	Sep-2020	can
8485474		55.0787607953465/-3.61904301680962	GB	Tue Sep 29 2020	Sep	2020	Sep-2020	plastic	wrapper
8485473		55.0788058061666/-3.61912532709876	GB	Tue Sep 29 2020	Sep	2020	Sep-2020	plastic
8485471		55.0789700495592/-3.61918902956286	GB	Tue Sep 29 2020	Sep	2020	Sep-2020	plastic
8485470		55.0788177922881/-3.61913672648707	GB	Tue Sep 29 2020	Sep	2020	Sep-2020	plastic
8485467		55.0790419243789/-3.61911384389141	GB	Tue Sep 29 2020	Sep	2020	Sep-2020	wrapper
8485466		55.0792108197278/-3.61939840950409	GB	Tue Sep 29 2020	Sep	2020	Sep-2020	plastic
8485465		55.0789154833696/-3.61916354857722	GB	Tue Sep 29 2020	Sep	2020	Sep-2020	cardboard
8485464		55.0797910805927/-3.61890088542197	GB	Tue Sep 29 2020	Sep	2020	Sep-2020	plastic
8485461		53.7886504445736/-1.48570795378991	GB	Tue Sep 29 2020	Sep	2020	Sep-2020	ppe	facemask
8485425		55.0775078742649/-3.62332583281593	GB	Tue Sep 29 2020	Sep	2020	Sep-2020	wrapper
8485424		55.0769868569565/-3.62414049563061	GB	Tue Sep 29 2020	Sep	2020	Sep-2020	glass
8485407		53.7894729428329/-1.49120818048067	GB	Tue Sep 29 2020	Sep	2020	Sep-2020	ppe	facemask
8485219		53.7897990547282/-1.49877269316195	GB	Tue Sep 29 2020	Sep	2020	Sep-2020	ppe	facemask
8485213		53.7897487451252/-1.49918250700116	GB	Tue Sep 29 2020	Sep	2020	Sep-2020	ppe	facemask
8485196		53.7904742810934/-1.51289778996458	GB	Tue Sep 29 2020	Sep	2020	Sep-2020	ppe	facemask
8485112		53.7903885034761/-1.51277782282355	GB	Tue Sep 29 2020	Sep	2020	Sep-2020	ppe	facemask
8484692		53.7836785187429/-1.53500540425673	GB	Tue Sep 29 2020	Sep	2020	Sep-2020	ppe	facemask
8484266		53.7801693640295/-1.56337591465875	GB	Tue Sep 29 2020	Sep	2020	Sep-2020	ppe	facemask
8484251		53.7801814426284/-1.56331751147851	GB	Tue Sep 29 2020	Sep	2020	Sep-2020	ppe	facemask
8484200		53.7789961192017/-1.56592602150619	GB	Tue Sep 29 2020	Sep	2020	Sep-2020	ppe	facemask
8484196		53.779019190203/-1.5660996431777	GB	Tue Sep 29 2020	Sep	2020	Sep-2020	ppe	facemask
8482756		53.7789608507544/-1.56580022619039	GB	Tue Sep 29 2020	Sep	2020	Sep-2020	ppe	facemask
8481238		54.9780015/-1.8240356	GB	Tue Sep 29 2020	Sep	2020	Sep-2020	rubbish	drink	tubbidhe	drinker	can
8481237		53.7947245278275/-1.55560916339047	GB	Tue Sep 29 2020	Sep	2020	Sep-2020	plastic	facemask	ppe
8481132		53.798169365875/-1.56838062159279	GB	Tue Sep 29 2020	Sep	2020	Sep-2020	ppe	facemask
8481053		53.8008985902114/-1.57384232101281	GB	Tue Sep 29 2020	Sep	2020	Sep-2020	ppe	facemask
8479755		51.9510033736215/-1.92718521260713	GB	Mon Sep 28 2020	Sep	2020	Sep-2020	rope
8479754		51.9796790251283/-1.94048837100012	GB	Mon Sep 28 2020	Sep	2020	Sep-2020	plastic
8479753		51.9803664427355/-1.94204569420549	GB	Mon Sep 28 2020	Sep	2020	Sep-2020	paper
8479752		51.9794585082667/-1.93940967656321	GB	Mon Sep 28 2020	Sep	2020	Sep-2020	plastic
8479751		51.9797163316425/-1.9404374023458	GB	Mon Sep 28 2020	Sep	2020	Sep-2020	plastic
8479619		53.806395320652/-1.58240907142875	GB	Tue Sep 29 2020	Sep	2020	Sep-2020	ppe	facemask
8479617		53.8065806000405/-1.58212243038619	GB	Tue Sep 29 2020	Sep	2020	Sep-2020	ppe	facemask
8479554		53.8063854637992/-1.58195417248213	GB	Tue Sep 29 2020	Sep	2020	Sep-2020	ppe	facemask
8479537		53.8062911436464/-1.58237404487807	GB	Tue Sep 29 2020	Sep	2020	Sep-2020	ppe	facemask
8479470		53.809599712939/-1.59231178043934	GB	Tue Sep 29 2020	Sep	2020	Sep-2020	ppe	facemask
8479254		53.8212124023974/-1.6078255816469	GB	Tue Sep 29 2020	Sep	2020	Sep-2020	ppe	facemask
8479198		53.8160643908062/-1.60220197837522	GB	Tue Sep 29 2020	Sep	2020	Sep-2020	ppe	facemask
8478099		53.8088245496238/-1.58384381814321	GB	Tue Sep 29 2020	Sep	2020	Sep-2020	ppe	disposableglove
8478070		53.8081822720247/-1.58138852036617	GB	Tue Sep 29 2020	Sep	2020	Sep-2020	ppe	facemask
8478017		53.8074802160687/-1.5786985714773	GB	Tue Sep 29 2020	Sep	2020	Sep-2020	ppe	facemask
8477955		53.8078780181982/-1.57044795346665	GB	Tue Sep 29 2020	Sep	2020	Sep-2020	ppe	disposableglove
8477863		53.8078367531249/-1.57044693091964	GB	Tue Sep 29 2020	Sep	2020	Sep-2020	ppe	facemask
8477786		53.8080145496745/-1.57035921421251	GB	Tue Sep 29 2020	Sep	2020	Sep-2020	ppe	facemask
8477697		53.8117808100334/-1.56919479237618	GB	Tue Sep 29 2020	Sep	2020	Sep-2020	ppe	facemask
8477663		53.8112982533309/-1.57305165528228	GB	Tue Sep 29 2020	Sep	2020	Sep-2020	ppe	facemask
8477266		53.814833949185/-1.5609900368529	GB	Tue Sep 29 2020	Sep	2020	Sep-2020	ppe	facemask
8476976		53.8140983043121/-1.55459125935156	GB	Tue Sep 29 2020	Sep	2020	Sep-2020	ppe	disposableglove
8476975		53.8143004216592/-1.55465628654972	GB	Tue Sep 29 2020	Sep	2020	Sep-2020	ppe	facemask
8476780		53.8139610478673/-1.55120690003094	GB	Tue Sep 29 2020	Sep	2020	Sep-2020	ppe	facemask
8476736		53.8139551958353/-1.55061641372787	GB	Tue Sep 29 2020	Sep	2020	Sep-2020	ppe	facemask
8476655		53.8142929789424/-1.54994262495095	GB	Tue Sep 29 2020	Sep	2020	Sep-2020	ppe	facemask
8476333		53.8218129704925/-1.55729912599981	GB	Tue Sep 29 2020	Sep	2020	Sep-2020	ppe	facemask
8476032		53.8314819568567/-1.55329047607271	GB	Tue Sep 29 2020	Sep	2020	Sep-2020	ppe	disposableglove
8476017		53.832705398639/-1.55260646223664	GB	Tue Sep 29 2020	Sep	2020	Sep-2020	ppe	facemask
8475991		53.8389858265477/-1.54718509783738	GB	Tue Sep 29 2020	Sep	2020	Sep-2020	ppe	disposableglove
8475937		51.8133753771445/-0.293421009555732	GB	Tue Sep 29 2020	Sep	2020	Sep-2020	foil	lid
8475936		51.8198921811318/-0.293898945674574	GB	Tue Sep 29 2020	Sep	2020	Sep-2020	plastic
8475935		51.8215911929047/-0.29547792859403	GB	Tue Sep 29 2020	Sep	2020	Sep-2020	plastic
8475934		51.8171174359059/-0.29203372076181	GB	Tue Sep 29 2020	Sep	2020	Sep-2020	disposableglove	plastic
8475933		51.8170903623587/-0.292086610570822	GB	Tue Sep 29 2020	Sep	2020	Sep-2020	plastic
8475932		51.8198903790226/-0.293889725581085	GB	Tue Sep 29 2020	Sep	2020	Sep-2020	plastic	vodkabottle
8475930		51.821621200118/-0.295469379052795	GB	Tue Sep 29 2020	Sep	2020	Sep-2020	can	beer
8475929		51.8240245851239/-0.300170369446557	GB	Tue Sep 29 2020	Sep	2020	Sep-2020	plastic
8475926		51.821077561796/-0.297542679563416	GB	Tue Sep 29 2020	Sep	2020	Sep-2020	dogpoobag
8475925		51.8213144643715/-0.296172201633729	GB	Tue Sep 29 2020	Sep	2020	Sep-2020	plastic
8475924		51.8212914979568/-0.298524247482697	GB	Tue Sep 29 2020	Sep	2020	Sep-2020	paper
8475923		51.8212172762042/-0.298416037112752	GB	Tue Sep 29 2020	Sep	2020	Sep-2020	plastic
8475922		51.8210960319748/-0.298443194479028	GB	Tue Sep 29 2020	Sep	2020	Sep-2020	plastic	bottlecap
8475919		51.8218624312913/-0.298756342381517	GB	Tue Sep 29 2020	Sep	2020	Sep-2020	foil
8475916		51.8219759641698/-0.298921465873997	GB	Tue Sep 29 2020	Sep	2020	Sep-2020	plastic
8475913		51.8225196982285/-0.299137970432918	GB	Tue Sep 29 2020	Sep	2020	Sep-2020	metal
8475912		51.8228394678345/-0.299357995391171	GB	Tue Sep 29 2020	Sep	2020	Sep-2020	plastic
8475911		51.8228527950606/-0.299376351759116	GB	Tue Sep 29 2020	Sep	2020	Sep-2020	plastic
8475910		51.8237839825934/-0.300048748031538	GB	Tue Sep 29 2020	Sep	2020	Sep-2020	plastic
8475909		51.8236879259831/-0.299926958978455	GB	Tue Sep 29 2020	Sep	2020	Sep-2020	plastic	bag
8475908		51.8241989647843/-0.300392368250145	GB	Tue Sep 29 2020	Sep	2020	Sep-2020	plastic
8475907		51.8240555143466/-0.30018663033871	GB	Tue Sep 29 2020	Sep	2020	Sep-2020	plastic
8475906		51.8243751582241/-0.300398860127014	GB	Tue Sep 29 2020	Sep	2020	Sep-2020	plastic
8475905		51.8244109489506/-0.300436746329349	GB	Tue Sep 29 2020	Sep	2020	Sep-2020	plastic	bottle
8475904		51.8243835820368/-0.300362650305312	GB	Tue Sep 29 2020	Sep	2020	Sep-2020	rag
8475903		51.8242078973463/-0.302829360589667	GB	Tue Sep 29 2020	Sep	2020	Sep-2020	wrapper
8475902		51.819648309659/-0.300186295062583	GB	Tue Sep 29 2020	Sep	2020	Sep-2020	bottle	plastic
8475901		51.8235746864712/-0.302532138303204	GB	Tue Sep 29 2020	Sep	2020	Sep-2020	wrapper	haribo
8475900		51.8208859814814/-0.300551578402799	GB	Tue Sep 29 2020	Sep	2020	Sep-2020	disposableglove
8475899		51.8192409029188/-0.299827731708595	GB	Tue Sep 29 2020	Sep	2020	Sep-2020	crisppacket
8475898		51.8192036496958/-0.299833500758093	GB	Tue Sep 29 2020	Sep	2020	Sep-2020	plastic
8475897		51.8134527840203/-0.293410867452895	GB	Tue Sep 29 2020	Sep	2020	Sep-2020	plastic
8475896		51.8135221023595/-0.293437186628853	GB	Tue Sep 29 2020	Sep	2020	Sep-2020	cigarette
8475895		51.81342164525/-0.293490663171088	GB	Tue Sep 29 2020	Sep	2020	Sep-2020	papercup
8475894		51.8138793390727/-0.293290168047224	GB	Tue Sep 29 2020	Sep	2020	Sep-2020	plastic
8475893		51.8135797279438/-0.293280445039545	GB	Tue Sep 29 2020	Sep	2020	Sep-2020	plastic
8475892		51.813866933856/-0.293240379542385	GB	Tue Sep 29 2020	Sep	2020	Sep-2020	wrapper
8475891		51.813659439843/-0.293246163055574	GB	Tue Sep 29 2020	Sep	2020	Sep-2020	wrapper
8475890		51.8138689455127/-0.293327048421179	GB	Tue Sep 29 2020	Sep	2020	Sep-2020	wrapper
8475889		51.8139677681511/-0.293308775872265	GB	Tue Sep 29 2020	Sep	2020	Sep-2020	foil	lid
8475888		51.8139268644637/-0.293343476951395	GB	Tue Sep 29 2020	Sep	2020	Sep-2020	wrapper
8475887		51.814263314057/-0.293187992647563	GB	Tue Sep 29 2020	Sep	2020	Sep-2020	paper
8475886		51.8139215838647/-0.293378680944716	GB	Tue Sep 29 2020	Sep	2020	Sep-2020	wrapper
8475885		51.814018232662/-0.293164008176283	GB	Tue Sep 29 2020	Sep	2020	Sep-2020	paper
8475884		51.8139776587969/-0.293303998187458	GB	Tue Sep 29 2020	Sep	2020	Sep-2020	plastic	bottle
8475883		51.8143560598156/-0.293208444491302	GB	Tue Sep 29 2020	Sep	2020	Sep-2020	plastic
8475882		51.8142307922727/-0.293185310438548	GB	Tue Sep 29 2020	Sep	2020	Sep-2020	plastic
8475881		51.8143291539064/-0.293202577159082	GB	Tue Sep 29 2020	Sep	2020	Sep-2020	cardboard	wrapper
8475880		51.8142565666249/-0.293192937970434	GB	Tue Sep 29 2020	Sep	2020	Sep-2020	lollipopstick
8475879		51.8143011709191/-0.293095725901598	GB	Tue Sep 29 2020	Sep	2020	Sep-2020	plastic
8475878		51.8143592030292/-0.293240295723354	GB	Tue Sep 29 2020	Sep	2020	Sep-2020	plastic
8475877		51.8143541319778/-0.293241888284956	GB	Tue Sep 29 2020	Sep	2020	Sep-2020	paper
8475876		51.8143725302553/-0.29319712892202	GB	Tue Sep 29 2020	Sep	2020	Sep-2020	plastic	lid
8475875		51.8143858155718/-0.293288407847558	GB	Tue Sep 29 2020	Sep	2020	Sep-2020	wrapper
8475874		51.8143698899558/-0.293243397027527	GB	Tue Sep 29 2020	Sep	2020	Sep-2020	plastic	hairbrush
8475873		51.8144907569995/-0.293168043718015	GB	Tue Sep 29 2020	Sep	2020	Sep-2020	straw
8475872		51.814361214686/-0.293217413127695	GB	Tue Sep 29 2020	Sep	2020	Sep-2020	plastic	bottlecap
8475871		51.8144409684947/-0.293211881071602	GB	Tue Sep 29 2020	Sep	2020	Sep-2020	plastic	cable
8475870		51.814502575483/-0.293156811967765	GB	Tue Sep 29 2020	Sep	2020	Sep-2020	paper
8475869		51.8145142682379/-0.293151615187799	GB	Tue Sep 29 2020	Sep	2020	Sep-2020	dogpoobag
8475868		51.815008716706/-0.293093444779788	GB	Tue Sep 29 2020	Sep	2020	Sep-2020	can	beer
8475867		51.8145427247992/-0.293057318777119	GB	Tue Sep 29 2020	Sep	2020	Sep-2020	plastic
8475866		51.8144826804375/-0.293134098791125	GB	Tue Sep 29 2020	Sep	2020	Sep-2020	plastic
8475865		51.8150962656846/-0.292958579957758	GB	Tue Sep 29 2020	Sep	2020	Sep-2020	wrapper
8475864		51.8150386820098/-0.293039213866268	GB	Tue Sep 29 2020	Sep	2020	Sep-2020	beer	can
8475863		51.8151465151942/-0.293010631576453	GB	Tue Sep 29 2020	Sep	2020	Sep-2020	plastic
8475862		51.817029132556/-0.292143272236262	GB	Tue Sep 29 2020	Sep	2020	Sep-2020	bottle	plastic
8475861		51.8150028912833/-0.292950198054586	GB	Tue Sep 29 2020	Sep	2020	Sep-2020	wrapper
8475860		51.8170213792956/-0.292172608897362	GB	Tue Sep 29 2020	Sep	2020	Sep-2020	plastic
8475859		51.8153481418749/-0.293176006526028	GB	Tue Sep 29 2020	Sep	2020	Sep-2020	piece
8475858		51.8155810749641/-0.292926393449579	GB	Tue Sep 29 2020	Sep	2020	Sep-2020	plastic
8475857		51.8170378916448/-0.292102787643943	GB	Tue Sep 29 2020	Sep	2020	Sep-2020	crisppacket
8475856		51.8153299531451/-0.293171647936379	GB	Tue Sep 29 2020	Sep	2020	Sep-2020	plastic
8475855		51.815870208714/-0.292753977701341	GB	Tue Sep 29 2020	Sep	2020	Sep-2020	wrapper
8475854		51.8152845107859/-0.293131770652049	GB	Tue Sep 29 2020	Sep	2020	Sep-2020	paper
8475853		51.8158910796529/-0.292834360152756	GB	Tue Sep 29 2020	Sep	2020	Sep-2020	plastic
8475852		51.8156834064668/-0.292913278101893	GB	Tue Sep 29 2020	Sep	2020	Sep-2020	wrapper
8475851		51.8162796646839/-0.292889010161434	GB	Tue Sep 29 2020	Sep	2020	Sep-2020	plastic
8475850		51.8170016818231/-0.29218032024828	GB	Tue Sep 29 2020	Sep	2020	Sep-2020	plastic
8475849		51.8169705430528/-0.292211249470983	GB	Tue Sep 29 2020	Sep	2020	Sep-2020	cardboard	packaging
8475848		51.8161327318037/-0.293600637065714	GB	Tue Sep 29 2020	Sep	2020	Sep-2020	can
8475847		51.8169720937049/-0.292215691879664	GB	Tue Sep 29 2020	Sep	2020	Sep-2020	cardboard
8475846		51.8171130354067/-0.292013855651293	GB	Tue Sep 29 2020	Sep	2020	Sep-2020	plastic
8475828		51.8190103115046/-0.299611203062024	GB	Tue Sep 29 2020	Sep	2020	Sep-2020	wrapper
8475827		51.816575387819/-0.297265836249169	GB	Tue Sep 29 2020	Sep	2020	Sep-2020	wetwipe
8475826		51.8162829336261/-0.299661001190822	GB	Tue Sep 29 2020	Sep	2020	Sep-2020	piece
8475825		51.8158622039965/-0.300104320049565	GB	Tue Sep 29 2020	Sep	2020	Sep-2020	wrapper
8475824		51.8159529800078/-0.299962246790808	GB	Tue Sep 29 2020	Sep	2020	Sep-2020	dogpoo
8475823		51.8159769103414/-0.300016896799486	GB	Tue Sep 29 2020	Sep	2020	Sep-2020	foil
8475822		51.8159509264415/-0.30005469918279	GB	Tue Sep 29 2020	Sep	2020	Sep-2020	plastic
8475821		51.8159388984105/-0.300080934539717	GB	Tue Sep 29 2020	Sep	2020	Sep-2020	paper
8475820		51.8159395689627/-0.300142038613837	GB	Tue Sep 29 2020	Sep	2020	Sep-2020	plastic
8475819		51.8159458553901/-0.300177242607158	GB	Tue Sep 29 2020	Sep	2020	Sep-2020	cigarette
8475818		51.8159551677528/-0.300058423873045	GB	Tue Sep 29 2020	Sep	2020	Sep-2020	can
8475817		51.8158790935313/-0.300060734153073	GB	Tue Sep 29 2020	Sep	2020	Sep-2020	bottlecap
8475816		51.8159557460358/-0.300240274519008	GB	Tue Sep 29 2020	Sep	2020	Sep-2020	paper
8475815		51.8158602761587/-0.300007592886966	GB	Tue Sep 29 2020	Sep	2020	Sep-2020	wrapper
8475814		51.8158402853197/-0.300037683919352	GB	Tue Sep 29 2020	Sep	2020	Sep-2020	plastic
8475813		51.8159144651627/-0.299890162423532	GB	Tue Sep 29 2020	Sep	2020	Sep-2020	plastic
8475812		51.8158616591727/-0.299988901242893	GB	Tue Sep 29 2020	Sep	2020	Sep-2020	wrapper
8475811		51.8159250452527/-0.300090905107156	GB	Tue Sep 29 2020	Sep	2020	Sep-2020	wrapper
8475810		51.8158183247333/-0.300070960074943	GB	Tue Sep 29 2020	Sep	2020	Sep-2020	plastic
8475809		51.8136501359305/-0.296600181609668	GB	Tue Sep 29 2020	Sep	2020	Sep-2020	piece
8475808		51.8157109525537/-0.30006157234339	GB	Tue Sep 29 2020	Sep	2020	Sep-2020	can	beer
8475807		51.8154331658547/-0.300129603355704	GB	Tue Sep 29 2020	Sep	2020	Sep-2020	paper
8475806		51.8145429515226/-0.299607537104099	GB	Tue Sep 29 2020	Sep	2020	Sep-2020	crisppacket
8475805		51.8150088424346/-0.300047742203157	GB	Tue Sep 29 2020	Sep	2020	Sep-2020	dogpoobag
8475804		51.8148424197471/-0.299981608987134	GB	Tue Sep 29 2020	Sep	2020	Sep-2020	paper
8475803		51.8145274697354/-0.299225896597187	GB	Tue Sep 29 2020	Sep	2020	Sep-2020	cigarette
8475802		51.8146771286165/-0.299772899598162	GB	Tue Sep 29 2020	Sep	2020	Sep-2020	tissue
8475801		51.8144581094867/-0.299053983763139	GB	Tue Sep 29 2020	Sep	2020	Sep-2020	tissue
8475800		51.8145054672396/-0.299167139455955	GB	Tue Sep 29 2020	Sep	2020	Sep-2020	bottlecap
8475799		51.8139765691495/-0.297739533707777	GB	Tue Sep 29 2020	Sep	2020	Sep-2020	wrapper
8475798		51.8144093268102/-0.298827756196539	GB	Tue Sep 29 2020	Sep	2020	Sep-2020	wrapper
8475797		51.8143997295311/-0.298637906089703	GB	Tue Sep 29 2020	Sep	2020	Sep-2020	wrapper
8475796		51.8143458758032/-0.298591721803228	GB	Tue Sep 29 2020	Sep	2020	Sep-2020	wrapper
8475795		51.8134470674916/-0.296234069315624	GB	Tue Sep 29 2020	Sep	2020	Sep-2020	cigarette
8475794		51.8141139066329/-0.298165166750828	GB	Tue Sep 29 2020	Sep	2020	Sep-2020	wrapper
8475793		51.8127405737078/-0.295344907790697	GB	Tue Sep 29 2020	Sep	2020	Sep-2020	piece
8475792		51.8138805683451/-0.297580178403512	GB	Tue Sep 29 2020	Sep	2020	Sep-2020	foodwrapper	styrofoam
8475791		51.8139713723695/-0.297607937827984	GB	Tue Sep 29 2020	Sep	2020	Sep-2020	piece
8475790		51.8139883457234/-0.297784376889745	GB	Tue Sep 29 2020	Sep	2020	Sep-2020	piece
8475789		51.8135798525213/-0.29791305624793	GB	Tue Sep 29 2020	Sep	2020	Sep-2020	wrapper
8475788		51.8139947578793/-0.29756770469276	GB	Tue Sep 29 2020	Sep	2020	Sep-2020	wrapper
8475787		51.8136837579514/-0.296912708742024	GB	Tue Sep 29 2020	Sep	2020	Sep-2020	cigarette
8475786		51.8129734419942/-0.294625099899548	GB	Tue Sep 29 2020	Sep	2020	Sep-2020	cigarette
8473016		53.8349026044255/-1.52049226524454	GB	Tue Sep 29 2020	Sep	2020	Sep-2020	ppe	facemask
8472989		53.8344655329108/-1.52078046656248	GB	Tue Sep 29 2020	Sep	2020	Sep-2020	ppe	facemask
8448746		51.6467861513306/-3.29175366801635	GB	Mon Sep 28 2020	Sep	2020	Sep-2020	butt	cigarette
8448745		51.6468906869342/-3.29166839937954	GB	Mon Sep 28 2020	Sep	2020	Sep-2020	butt	cigarette
8448743		51.6475467181344/-3.29097519144319	GB	Mon Sep 28 2020	Sep	2020	Sep-2020	butt	cigarette
8448492		51.6468656079127/-3.29165914557922	GB	Mon Sep 28 2020	Sep	2020	Sep-2020	butt	cigarette
8448491		51.6468656079127/-3.29165914557922	GB	Mon Sep 28 2020	Sep	2020	Sep-2020	butt	cigarette
8448431		51.6469757576158/-3.29169698232537	GB	Mon Sep 28 2020	Sep	2020	Sep-2020	butt	cigarette
8448424		51.6468795376933/-3.29172362620302	GB	Mon Sep 28 2020	Sep	2020	Sep-2020	butt	cigarette
8448423		51.6468534883943/-3.29176733722972	GB	Mon Sep 28 2020	Sep	2020	Sep-2020	cigarette	butt
8448421		51.6469475966595/-3.29160242672316	GB	Mon Sep 28 2020	Sep	2020	Sep-2020	butt	cigarette
8448420		51.6468514525255/-3.29178059027725	GB	Mon Sep 28 2020	Sep	2020	Sep-2020	butt	cigarette
8448418		51.6468514525255/-3.29178059027725	GB	Mon Sep 28 2020	Sep	2020	Sep-2020	cigarette	butt
8448417		51.6468646289439/-3.29172958645331	GB	Mon Sep 28 2020	Sep	2020	Sep-2020	butt	cigarette
8448416		51.6468503203109/-3.29170910924445	GB	Mon Sep 28 2020	Sep	2020	Sep-2020	cigarette	butt
8448414		51.6473511609122/-3.29116179029281	GB	Mon Sep 28 2020	Sep	2020	Sep-2020	butt	cigarette
8448413		51.6468411559643/-3.29171355255574	GB	Mon Sep 28 2020	Sep	2020	Sep-2020	butt	cigarette
8448412		51.6468362307465/-3.29167256230153	GB	Mon Sep 28 2020	Sep	2020	Sep-2020	butt	cigarette
8448409		51.646838658358/-3.29169463569698	GB	Mon Sep 28 2020	Sep	2020	Sep-2020	cigarette	butt
8448191		51.646872514729/-3.29162554847675	GB	Mon Sep 28 2020	Sep	2020	Sep-2020	butt	cigarette
8448190		51.6471981991736/-3.2910538888978	GB	Mon Sep 28 2020	Sep	2020	Sep-2020	butt	cigarette
8448188		51.6468230139207/-3.29173003107194	GB	Mon Sep 28 2020	Sep	2020	Sep-2020	piece	plastic
8448187		51.646872514729/-3.29162554847675	GB	Mon Sep 28 2020	Sep	2020	Sep-2020	rubber	ring
8448186		51.646818519614/-3.29169943582586	GB	Mon Sep 28 2020	Sep	2020	Sep-2020	butt	cigarette
8448185		51.646818519614/-3.29169943582586	GB	Mon Sep 28 2020	Sep	2020	Sep-2020	piece	plastic
8447529		51.6469876818504/-3.29178752020189	GB	Mon Sep 28 2020	Sep	2020	Sep-2020	golf ball	srixon
8447402		51.6468293562759/-3.29161962086773	GB	Mon Sep 28 2020	Sep	2020	Sep-2020	aluminum	can	cocacola
8447401		51.6467483583085/-3.29163171203462	GB	Mon Sep 28 2020	Sep	2020	Sep-2020	bottle	plastic	energydrink	lucozade
8447400		51.6467934132804/-3.29166623616632	GB	Mon Sep 28 2020	Sep	2020	Sep-2020	bottlecap	plastic
8447398		51.6467934132804/-3.29166623616632	GB	Mon Sep 28 2020	Sep	2020	Sep-2020	plastic	ring
8447321		51.6467009266794/-3.29182568177714	GB	Mon Sep 28 2020	Sep	2020	Sep-2020	butt	cigarette
8447320		51.6470375626941/-3.2915644326774	GB	Mon Sep 28 2020	Sep	2020	Sep-2020	butt	cigarette
8447319		51.6471856096723/-3.29136682743097	GB	Mon Sep 28 2020	Sep	2020	Sep-2020	butt	cigarette
8447318		51.6467880862589/-3.2916975338333	GB	Mon Sep 28 2020	Sep	2020	Sep-2020	cigarette	butt
8447317		51.6467629813701/-3.29177322560661	GB	Mon Sep 28 2020	Sep	2020	Sep-2020	butt	cigarette
8447039		51.6469343821585/-3.29183262269273	GB	Mon Sep 28 2020	Sep	2020	Sep-2020	butt	cigarette
8447038		51.6467380849125/-3.29173809552917	GB	Mon Sep 28 2020	Sep	2020	Sep-2020	butt	cigarette
8447036		51.6469090118748/-3.29171642253274	GB	Mon Sep 28 2020	Sep	2020	Sep-2020	cigarette	butt
8447034		51.6468058176842/-3.29173921212587	GB	Mon Sep 28 2020	Sep	2020	Sep-2020	cigarette	butt
8447031		51.6467380849125/-3.29173809552917	GB	Mon Sep 28 2020	Sep	2020	Sep-2020	butt	cigarette
8447010		51.6468918639662/-3.29128231932894	GB	Mon Sep 28 2020	Sep	2020	Sep-2020	cigarette	butt
8447008		51.6468918639662/-3.29128231932894	GB	Mon Sep 28 2020	Sep	2020	Sep-2020	cigarette	butt
8447007		51.6469017958129/-3.29156114355851	GB	Mon Sep 28 2020	Sep	2020	Sep-2020	cigarette	butt
8447005		51.646842536285/-3.29163407027538	GB	Mon Sep 28 2020	Sep	2020	Sep-2020	butt	cigarette
8447004		51.6472521494523/-3.29113115264234	GB	Mon Sep 28 2020	Sep	2020	Sep-2020	cigarette	butt
8447002		51.6467187590122/-3.29162519275478	GB	Mon Sep 28 2020	Sep	2020	Sep-2020	cigarette	butt
8447001		51.646920086026/-3.29169771024769	GB	Mon Sep 28 2020	Sep	2020	Sep-2020	butt	cigarette
8447000		51.6467187590122/-3.29162519275478	GB	Mon Sep 28 2020	Sep	2020	Sep-2020	cigarette	butt
8446999		51.6467375207043/-3.29179249309811	GB	Mon Sep 28 2020	Sep	2020	Sep-2020	cigarette	butt
8446998		51.6467059921962/-3.29157735975317	GB	Mon Sep 28 2020	Sep	2020	Sep-2020	cigarette	butt
8446996		51.6467422141233/-3.29168452975935	GB	Mon Sep 28 2020	Sep	2020	Sep-2020	cigarette	butt
8446995		51.6467375207043/-3.29179249309811	GB	Mon Sep 28 2020	Sep	2020	Sep-2020	butt	cigarette
8446994		51.6467969318578/-3.29171273409404	GB	Mon Sep 28 2020	Sep	2020	Sep-2020	cigarette	butt
8446992		51.6467321494173/-3.29163692913136	GB	Mon Sep 28 2020	Sep	2020	Sep-2020	cigarette	butt
8446991		51.6468838317672/-3.29156224655685	GB	Mon Sep 28 2020	Sep	2020	Sep-2020	butt	cigarette
8446990		51.6467514769202/-3.29166358320834	GB	Mon Sep 28 2020	Sep	2020	Sep-2020	cigarette	butt
8446989		51.6468259733983/-3.29172765908704	GB	Mon Sep 28 2020	Sep	2020	Sep-2020	cigarette	butt
8446988		51.6468838317672/-3.29156224655685	GB	Mon Sep 28 2020	Sep	2020	Sep-2020	butt	cigarette
8446987		51.6468222881041/-3.29168828214112	GB	Mon Sep 28 2020	Sep	2020	Sep-2020	butt	cigarette
8446986		51.6468277337888/-3.29169245773839	GB	Mon Sep 28 2020	Sep	2020	Sep-2020	butt	cigarette
8446985		51.6468113289651/-3.29175618896298	GB	Mon Sep 28 2020	Sep	2020	Sep-2020	cigarette	butt
8446983		51.6467968274143/-3.29172879442439	GB	Mon Sep 28 2020	Sep	2020	Sep-2020	butt	cigarette
8446982		51.646817965877/-3.2917115271805	GB	Mon Sep 28 2020	Sep	2020	Sep-2020	cigarette	butt
8446870		51.6467939974512/-3.29179858816535	GB	Mon Sep 28 2020	Sep	2020	Sep-2020	butt	cigarette
8446864		51.6467725775471/-3.2916505645642	GB	Mon Sep 28 2020	Sep	2020	Sep-2020	cigarette	butt
8446863		51.6472237089779/-3.2909539529764	GB	Mon Sep 28 2020	Sep	2020	Sep-2020	butt	cigarette
8446861		51.6467716379826/-3.29168073473563	GB	Mon Sep 28 2020	Sep	2020	Sep-2020	cigarette	butt
8446860		51.646940476574/-3.29158081424981	GB	Mon Sep 28 2020	Sep	2020	Sep-2020	butt	cigarette
8446859		51.6468661861225/-3.29173314960552	GB	Mon Sep 28 2020	Sep	2020	Sep-2020	cigarette	butt
8446858		51.6468076348707/-3.29177121398279	GB	Mon Sep 28 2020	Sep	2020	Sep-2020	butt	cigarette
8446857		51.6468076348707/-3.29177121398279	GB	Mon Sep 28 2020	Sep	2020	Sep-2020	butt	cigarette
8446856		51.6472680635613/-3.29093514665539	GB	Mon Sep 28 2020	Sep	2020	Sep-2020	butt	cigarette
8446852		51.646810734159/-3.29171338160541	GB	Mon Sep 28 2020	Sep	2020	Sep-2020	butt	cigarette
8446346		50.9237333/-1.3755776	GB	Mon Sep 28 2020	Sep	2020	Sep-2020	facemask
8446339		51.6466932316498/-3.29027932326884	GB	Mon Sep 28 2020	Sep	2020	Sep-2020	metal piece
8446334		51.6465792242272/-3.29019311563991	GB	Mon Sep 28 2020	Sep	2020	Sep-2020	metal piece
8446332		51.6465298500984/-3.29021819151234	GB	Mon Sep 28 2020	Sep	2020	Sep-2020	cigarette	butt
8446196		51.6465640230993/-3.29022229837067	GB	Mon Sep 28 2020	Sep	2020	Sep-2020	cigarette	butt
8445915		51.646671336974/-3.29026665385263	GB	Mon Sep 28 2020	Sep	2020	Sep-2020	metal piece
8445914		51.6466595890869/-3.29024753933435	GB	Mon Sep 28 2020	Sep	2020	Sep-2020	metal piece
8445913		51.6466722679901/-3.29024663232325	GB	Mon Sep 28 2020	Sep	2020	Sep-2020	metal piece
8445911		51.646666912176/-3.29026516907734	GB	Mon Sep 28 2020	Sep	2020	Sep-2020	metal piece
8445874		53.840205/-1.49931667	GB	Mon Sep 28 2020	Sep	2020	Sep-2020	ppe	facemask
8445286		51.6465841836542/-3.29049942197982	GB	Mon Sep 28 2020	Sep	2020	Sep-2020	cigarette	butt
8445284		51.646619609032/-3.29053302777015	GB	Mon Sep 28 2020	Sep	2020	Sep-2020	cigarette	butt
8445177		51.6467228289764/-3.29041903690153	GB	Mon Sep 28 2020	Sep	2020	Sep-2020	butt	cigarette
8445176		51.6467045912308/-3.29031515911325	GB	Mon Sep 28 2020	Sep	2020	Sep-2020	butt	cigarette
8445175		51.6467868438462/-3.29006790721554	GB	Mon Sep 28 2020	Sep	2020	Sep-2020	plastic	bottle lid
8444993		51.6468478587745/-3.29046076571071	GB	Mon Sep 28 2020	Sep	2020	Sep-2020	bottlecap	metal
8444992		51.646780374123/-3.29048466205697	GB	Mon Sep 28 2020	Sep	2020	Sep-2020	bottlecap	metal
8444977		51.646686365429/-3.29025071849369	GB	Mon Sep 28 2020	Sep	2020	Sep-2020	cigarette	butt
8444954		51.6466295342354/-3.29029466578549	GB	Mon Sep 28 2020	Sep	2020	Sep-2020	plastic
8444953		51.6466519459168/-3.29026566245451	GB	Mon Sep 28 2020	Sep	2020	Sep-2020	steelscrap
8444946		51.6466542317037/-3.29037083987245	GB	Mon Sep 28 2020	Sep	2020	Sep-2020	steelscrap
8444912		51.6467366322595/-3.29045606436117	GB	Mon Sep 28 2020	Sep	2020	Sep-2020	cigarette	butt
8444903		51.64679138509/-3.2904135638763	GB	Mon Sep 28 2020	Sep	2020	Sep-2020	butt	cigarette
8444901		51.6467241738995/-3.29043190699931	GB	Mon Sep 28 2020	Sep	2020	Sep-2020	cigarette	butt
8444898		51.6468099430247/-3.29040699467628	GB	Mon Sep 28 2020	Sep	2020	Sep-2020	butt	cigarette
8444895		51.6466710639523/-3.29040237704153	GB	Mon Sep 28 2020	Sep	2020	Sep-2020	cigarette	butt
8444890		51.6466710639523/-3.29040237704153	GB	Mon Sep 28 2020	Sep	2020	Sep-2020	cigarette	butt
8444888		51.64656526434/-3.29012899899706	GB	Mon Sep 28 2020	Sep	2020	Sep-2020	butt	cigarette
8444884		51.6466909230889/-3.29038023085777	GB	Mon Sep 28 2020	Sep	2020	Sep-2020	butt	cigarette
8444883		51.6466909230889/-3.29038023085777	GB	Mon Sep 28 2020	Sep	2020	Sep-2020	butt	cigarette
8442455		50.9333632/-1.3709722	GB	Mon Sep 28 2020	Sep	2020	Sep-2020	facemask
8442428		50.9331939/-1.3712406	GB	Mon Sep 28 2020	Sep	2020	Sep-2020	facemask
8441771		51.8057042825701/-0.293083384787727	GB	Mon Sep 28 2020	Sep	2020	Sep-2020	bag
8441153		50.9254882/-1.3664795	GB	Mon Sep 28 2020	Sep	2020	Sep-2020	facemask
8440661		53.8474837924976/-1.53478404886021	GB	Mon Sep 28 2020	Sep	2020	Sep-2020	ppe	facemask
8440532		53.8468304045395/-1.53469709061658	GB	Mon Sep 28 2020	Sep	2020	Sep-2020	ppe	facemask
8439673		51.9795047115058/-1.93968550631676	GB	Mon Sep 28 2020	Sep	2020	Sep-2020	aluminium	can
8439637		51.9795192428785/-1.93968180356987	GB	Mon Sep 28 2020	Sep	2020	Sep-2020	aluminum	can
8439636		51.9771315715035/-1.9371299582691	GB	Mon Sep 28 2020	Sep	2020	Sep-2020	coffee lid
8439635		51.9797270663056/-1.94040600473478	GB	Mon Sep 28 2020	Sep	2020	Sep-2020	plastic
8439634		51.9796941358732/-1.9404814223544	GB	Mon Sep 28 2020	Sep	2020	Sep-2020	glove
8439633		51.9797609193354/-1.9403611404724	GB	Mon Sep 28 2020	Sep	2020	Sep-2020	plastic
8439632		51.979639507392/-1.94033513029216	GB	Mon Sep 28 2020	Sep	2020	Sep-2020	aluminum	can
8439630		51.9803973509902/-1.94202287087025	GB	Mon Sep 28 2020	Sep	2020	Sep-2020	plastic
8439397		51.9510084742207/-1.92718992900591	GB	Mon Sep 28 2020	Sep	2020	Sep-2020	shotgunshell
8439393		51.9547796598694/-1.93106993286391	GB	Mon Sep 28 2020	Sep	2020	Sep-2020	balloon
8439391		51.9794308504974/-1.93931154681448	GB	Mon Sep 28 2020	Sep	2020	Sep-2020	plastic
8439389		51.9642610438569/-1.92943296931657	GB	Mon Sep 28 2020	Sep	2020	Sep-2020	bottle	plastic
8439387		51.9525793329223/-1.92785010797239	GB	Fri Sep 25 2020	Sep	2020	Sep-2020	plastic
8438903		53.8396751417965/-1.49865031842159	GB	Mon Sep 28 2020	Sep	2020	Sep-2020	ppe	facemask
8438499		51.5644646/-0.0731393	GB	Mon Sep 28 2020	Sep	2020	Sep-2020	ppe
8436324		53.8401877643532/-1.49929504151431	GB	Mon Sep 28 2020	Sep	2020	Sep-2020	ppe	facemask
8434660		51.8122022/-0.287712299722222	GB	Mon Sep 28 2020	Sep	2020	Sep-2020	plastic	bottlecap	plasticbottle	paper	wrapper
8433996		53.8411284023468/-1.4923277644717	GB	Mon Sep 28 2020	Sep	2020	Sep-2020	ppe	facemask
8433663		53.8397474755243/-1.49431162475832	GB	Mon Sep 28 2020	Sep	2020	Sep-2020	ppe	facemask
8432284		53.8566766691547/-1.53044686126167	GB	Mon Sep 28 2020	Sep	2020	Sep-2020	ppe	facemask
8432283		53.8566423330367/-1.53057065246843	GB	Mon Sep 28 2020	Sep	2020	Sep-2020	ppe	facemask
8432204		53.8562243902589/-1.53064050304945	GB	Mon Sep 28 2020	Sep	2020	Sep-2020	ppe	disposableglove
8432035		53.856000598562/-1.53079598195237	GB	Mon Sep 28 2020	Sep	2020	Sep-2020	ppe	facemask
8431098		51.5663839/-0.0731552	GB	Sun Sep 27 2020	Sep	2020	Sep-2020	glove	latex	ppe
8429789		53.8444755519089/-1.53456017177655	GB	Mon Sep 28 2020	Sep	2020	Sep-2020	ppe	facemask
8429613		53.844628128192/-1.53441744500452	GB	Mon Sep 28 2020	Sep	2020	Sep-2020	ppe	facemask
8429526		52.0309945/-1.1440055	GB	Mon Sep 28 2020	Sep	2020	Sep-2020	brackley	bag	of
8429470		50.9260841/-1.3642924	GB	Mon Sep 28 2020	Sep	2020	Sep-2020	facemask
8429468		50.9260445/-1.3643527	GB	Mon Sep 28 2020	Sep	2020	Sep-2020	facemask
8429465		53.8447030317426/-1.53463428266246	GB	Mon Sep 28 2020	Sep	2020	Sep-2020	ppe	facemask
8424587		53.7933816798592/-1.55681532957074	GB	Mon Sep 28 2020	Sep	2020	Sep-2020	plastic	facemask	ppe
8424586		53.803050231089/-1.58795651901618	GB	Mon Sep 28 2020	Sep	2020	Sep-2020	plastic	facemask	ppe
8424558		51.812117295388/-0.294630518183387	GB	Mon Sep 28 2020	Sep	2020	Sep-2020	tissue
8424555		51.8120760983339/-0.295178443193711	GB	Mon Sep 28 2020	Sep	2020	Sep-2020	tissue
8424553		51.8121302454284/-0.294421641156352	GB	Mon Sep 28 2020	Sep	2020	Sep-2020	ringpull
8424551		51.8125047488621/-0.29406633228091	GB	Mon Sep 28 2020	Sep	2020	Sep-2020	paper
8424549		51.8123032060003/-0.294181751087582	GB	Mon Sep 28 2020	Sep	2020	Sep-2020	paper
8424547		51.8124765437579/-0.293994247913634	GB	Mon Sep 28 2020	Sep	2020	Sep-2020	matchstick
8424546		51.8125420064217/-0.294061889872229	GB	Mon Sep 28 2020	Sep	2020	Sep-2020	cigarette
8424545		51.8125213031208/-0.294079994783079	GB	Mon Sep 28 2020	Sep	2020	Sep-2020	cigarette
8424544		51.8126742309442/-0.293826358393108	GB	Mon Sep 28 2020	Sep	2020	Sep-2020	cigarette
8424543		51.8125838321185/-0.293967342004454	GB	Mon Sep 28 2020	Sep	2020	Sep-2020	paper
8424542		51.8126206705829/-0.293913614005124	GB	Mon Sep 28 2020	Sep	2020	Sep-2020	cigarette
8424541		51.8126811879238/-0.293688224628841	GB	Mon Sep 28 2020	Sep	2020	Sep-2020	foil
8424540		51.8126920005789/-0.29366031289128	GB	Mon Sep 28 2020	Sep	2020	Sep-2020	piece
8424539		51.8127551163098/-0.29377514496473	GB	Mon Sep 28 2020	Sep	2020	Sep-2020	cigarette
8424538		51.8127534818387/-0.293792998418486	GB	Mon Sep 28 2020	Sep	2020	Sep-2020	plastic
8424537		51.8127519730961/-0.293808672577416	GB	Mon Sep 28 2020	Sep	2020	Sep-2020	plastic
8424536		51.8126944313308/-0.293892491609132	GB	Mon Sep 28 2020	Sep	2020	Sep-2020	wrapper
8424535		51.8127127876988/-0.293854689225828	GB	Mon Sep 28 2020	Sep	2020	Sep-2020	paper
8424534		51.8127086386567/-0.293879918754374	GB	Mon Sep 28 2020	Sep	2020	Sep-2020	cleaningcloth
8424533		51.8127090577519/-0.293869273737347	GB	Mon Sep 28 2020	Sep	2020	Sep-2020	cleaningcloth
8424531		51.8126651365792/-0.293909339234507	GB	Mon Sep 28 2020	Sep	2020	Sep-2020	foil
8424530		51.8126773322484/-0.293890899047529	GB	Mon Sep 28 2020	Sep	2020	Sep-2020	foil
8424529		51.8126633344701/-0.293925935402786	GB	Mon Sep 28 2020	Sep	2020	Sep-2020	paper
8424528		51.8126633344701/-0.293925935402786	GB	Mon Sep 28 2020	Sep	2020	Sep-2020	wrapper
8424527		51.8126633344701/-0.293925935402786	GB	Mon Sep 28 2020	Sep	2020	Sep-2020	wrapper
8424526		51.812659101609/-0.293917469680583	GB	Mon Sep 28 2020	Sep	2020	Sep-2020	wrapper
8424525		51.8126663938647/-0.29399550519911	GB	Mon Sep 28 2020	Sep	2020	Sep-2020	facemask
8424524		51.8126654718554/-0.293937418610131	GB	Mon Sep 28 2020	Sep	2020	Sep-2020	wrapper
8424523		51.8126444332784/-0.294003887102282	GB	Mon Sep 28 2020	Sep	2020	Sep-2020	cigarette
8424522		51.8126382306701/-0.294013358652866	GB	Mon Sep 28 2020	Sep	2020	Sep-2020	plastic
8424520		51.8126663938647/-0.29399550519911	GB	Mon Sep 28 2020	Sep	2020	Sep-2020	cleaningcloth
8424519		51.8126403261459/-0.294014867395436	GB	Mon Sep 28 2020	Sep	2020	Sep-2020	cigarette
8424518		51.8126408709696/-0.29399894177941	GB	Mon Sep 28 2020	Sep	2020	Sep-2020	plastic	leaf
8424517		51.8126403261459/-0.294014867395436	GB	Mon Sep 28 2020	Sep	2020	Sep-2020	cigarette
8424516		51.8126199581212/-0.294045964256203	GB	Mon Sep 28 2020	Sep	2020	Sep-2020	paper
8424515		51.8126009731105/-0.294065074995434	GB	Mon Sep 28 2020	Sep	2020	Sep-2020	cigarette
8424514		51.812606463257/-0.294067170471227	GB	Mon Sep 28 2020	Sep	2020	Sep-2020	plastic	leaf
8424513		51.8126034876814/-0.294073959812796	GB	Mon Sep 28 2020	Sep	2020	Sep-2020	cleaningcloth
8424512		51.812652521815/-0.294070355594432	GB	Mon Sep 28 2020	Sep	2020	Sep-2020	wrapper
8424511		51.8126412900647/-0.294073624536669	GB	Mon Sep 28 2020	Sep	2020	Sep-2020	plastic	leaf
8424510		51.8126589339709/-0.294070607051527	GB	Mon Sep 28 2020	Sep	2020	Sep-2020	wetwipe
8424509		51.8126693694403/-0.294040599838173	GB	Mon Sep 28 2020	Sep	2020	Sep-2020	plastic
8424508		51.8126544077432/-0.294071361422813	GB	Mon Sep 28 2020	Sep	2020	Sep-2020	plastic	leaf
8424507		51.8126780028006/-0.294038085267222	GB	Mon Sep 28 2020	Sep	2020	Sep-2020	plastic	leaf
8424506		51.8126785476243/-0.294033726677572	GB	Mon Sep 28 2020	Sep	2020	Sep-2020	cigarette
8424505		51.812668363612/-0.294044036418473	GB	Mon Sep 28 2020	Sep	2020	Sep-2020	wrapper
8424504		51.8126588501519/-0.294034481048858	GB	Mon Sep 28 2020	Sep	2020	Sep-2020	dogpoobag
8424503		51.8126334529853/-0.294014615938341	GB	Mon Sep 28 2020	Sep	2020	Sep-2020	plastic	leaf
8424502		51.8125949381402/-0.293860891834175	GB	Mon Sep 28 2020	Sep	2020	Sep-2020	plastic	leaf
8424501		51.8126572994998/-0.293979495764052	GB	Mon Sep 28 2020	Sep	2020	Sep-2020	wrapper
8424500		51.8126632087415/-0.29394957236973	GB	Mon Sep 28 2020	Sep	2020	Sep-2020	paper
8424499		51.8127026036864/-0.294002713635838	GB	Mon Sep 28 2020	Sep	2020	Sep-2020	wetwipe
8424498		51.8126828223949/-0.293955355882918	GB	Mon Sep 28 2020	Sep	2020	Sep-2020	plastic	leaf
8424497		51.8126828223949/-0.293955355882918	GB	Mon Sep 28 2020	Sep	2020	Sep-2020	plastic
8424496		51.8127540685719/-0.293973376974737	GB	Mon Sep 28 2020	Sep	2020	Sep-2020	plastic
8424495		51.8127031904196/-0.293968850747025	GB	Mon Sep 28 2020	Sep	2020	Sep-2020	plastic	leaf
8424494		51.8126818584761/-0.293963821605122	GB	Mon Sep 28 2020	Sep	2020	Sep-2020	plastic	leaf
8424493		51.8126614904514/-0.293915960938012	GB	Mon Sep 28 2020	Sep	2020	Sep-2020	plastic	leaf
8424492		51.8127173977455/-0.293976981193101	GB	Mon Sep 28 2020	Sep	2020	Sep-2020	plastic	leaf
8424491		51.812647408854/-0.293916715309298	GB	Mon Sep 28 2020	Sep	2020	Sep-2020	plastic	leaf
8424490		51.8126742728537/-0.293887294829165	GB	Mon Sep 28 2020	Sep	2020	Sep-2020	plastic	leaf
8424489		51.8127419567218/-0.293924091384089	GB	Mon Sep 28 2020	Sep	2020	Sep-2020	plastic	leaf
8424488		51.8126838282233/-0.293876733631169	GB	Mon Sep 28 2020	Sep	2020	Sep-2020	cardboard	packaging
8424486		51.8127578823378/-0.293907159939682	GB	Mon Sep 28 2020	Sep	2020	Sep-2020	plastic	leaf
8424485		51.812715972822/-0.293875727802789	GB	Mon Sep 28 2020	Sep	2020	Sep-2020	plastic	leaf
8424484		51.8127032323292/-0.293940603733336	GB	Mon Sep 28 2020	Sep	2020	Sep-2020	tissue
8424483		51.8127629114797/-0.29388410970596	GB	Mon Sep 28 2020	Sep	2020	Sep-2020	tissue
8424482		51.8127351254707/-0.293892072513973	GB	Mon Sep 28 2020	Sep	2020	Sep-2020	plastic	leaf
8424481		51.812735879842/-0.293876649812138	GB	Mon Sep 28 2020	Sep	2020	Sep-2020	plastic	leaf
8424480		51.8127305573335/-0.293874386698281	GB	Mon Sep 28 2020	Sep	2020	Sep-2020	wrapper
8424479		51.8127119075989/-0.293890815228497	GB	Mon Sep 28 2020	Sep	2020	Sep-2020	cardboard
8424478		51.812735879842/-0.293876649812138	GB	Mon Sep 28 2020	Sep	2020	Sep-2020	cigarette
8424477		51.8127431301883/-0.293887546286261	GB	Mon Sep 28 2020	Sep	2020	Sep-2020	plastic	leaf
8424476		51.8127514701819/-0.293856533244526	GB	Mon Sep 28 2020	Sep	2020	Sep-2020	plastic	leaf
8424475		51.8127162661886/-0.293914955109632	GB	Mon Sep 28 2020	Sep	2020	Sep-2020	plastic	lid
8424474		51.8127461476734/-0.293870279565727	GB	Mon Sep 28 2020	Sep	2020	Sep-2020	plastic	leaf
8424473		51.8127280427626/-0.293877823278582	GB	Mon Sep 28 2020	Sep	2020	Sep-2020	plastic	leaf
8424472		51.8127210438734/-0.293899280950701	GB	Mon Sep 28 2020	Sep	2020	Sep-2020	plastic	leaf
8424471		51.8127473211398/-0.293832561001455	GB	Mon Sep 28 2020	Sep	2020	Sep-2020	plastic	leaf
8424470		51.8127475725969/-0.293837422505295	GB	Mon Sep 28 2020	Sep	2020	Sep-2020	paper
8424469		51.8127486203348/-0.293825436383759	GB	Mon Sep 28 2020	Sep	2020	Sep-2020	plastic	leaf
8424468		51.8126226403302/-0.293687302619492	GB	Mon Sep 28 2020	Sep	2020	Sep-2020	cigarette
8424467		51.812779423829/-0.293817222118651	GB	Mon Sep 28 2020	Sep	2020	Sep-2020	paper
8424466		51.812748955611/-0.293722506612813	GB	Mon Sep 28 2020	Sep	2020	Sep-2020	facemask
8424465		51.8126546592003/-0.293661653995787	GB	Mon Sep 28 2020	Sep	2020	Sep-2020	towel	golf
8424464		51.8126382725796/-0.293652936816489	GB	Mon Sep 28 2020	Sep	2020	Sep-2020	cardboard
8424463		51.8127715867495/-0.293443640694295	GB	Mon Sep 28 2020	Sep	2020	Sep-2020	cigarette
8424462		51.8128234707302/-0.293514635414158	GB	Mon Sep 28 2020	Sep	2020	Sep-2020	plastic
8424461		51.8128279131388/-0.29353131540147	GB	Mon Sep 28 2020	Sep	2020	Sep-2020	cigarette
8424460		51.8128232611826/-0.293649667874252	GB	Mon Sep 28 2020	Sep	2020	Sep-2020	cigarette
8424459		51.8128883466607/-0.293549504131352	GB	Mon Sep 28 2020	Sep	2020	Sep-2020	cigarette
8424458		51.8128221296257/-0.293597029522335	GB	Mon Sep 28 2020	Sep	2020	Sep-2020	cigarette
8424457		51.8127957266307/-0.293586887419497	GB	Mon Sep 28 2020	Sep	2020	Sep-2020	paper
8424456		51.812829631429/-0.293579846620833	GB	Mon Sep 28 2020	Sep	2020	Sep-2020	wrapper
8424455		51.8128952198213/-0.293485969305312	GB	Mon Sep 28 2020	Sep	2020	Sep-2020	facemask
8424454		51.8128606444707/-0.293664922938024	GB	Mon Sep 28 2020	Sep	2020	Sep-2020	cigarette
8424453		51.8128598481899/-0.293447831645881	GB	Mon Sep 28 2020	Sep	2020	Sep-2020	plastic
8424452		51.8128761929011/-0.293548582122003	GB	Mon Sep 28 2020	Sep	2020	Sep-2020	cigarette
8424450		51.8129725428781/-0.293463254347717	GB	Mon Sep 28 2020	Sep	2020	Sep-2020	cigarette
8424449		51.8129449664166/-0.293472474441206	GB	Mon Sep 28 2020	Sep	2020	Sep-2020	plastic
8424447		51.8129798351338/-0.293450597673928	GB	Mon Sep 28 2020	Sep	2020	Sep-2020	plastic
8424446		51.8129690643882/-0.293389074504649	GB	Mon Sep 28 2020	Sep	2020	Sep-2020	tissue
8424445		51.8130790349579/-0.293493177742039	GB	Mon Sep 28 2020	Sep	2020	Sep-2020	papercup
8424444		51.8130790349579/-0.293493177742039	GB	Mon Sep 28 2020	Sep	2020	Sep-2020	cigarette
8424443		51.813005525667/-0.293476497754728	GB	Mon Sep 28 2020	Sep	2020	Sep-2020	paper
8424442		51.8129813857859/-0.293496781960403	GB	Mon Sep 28 2020	Sep	2020	Sep-2020	wrapper
8424441		51.813029246453/-0.293516479432856	GB	Mon Sep 28 2020	Sep	2020	Sep-2020	paper
8424440		51.8129981495923/-0.293573392555391	GB	Mon Sep 28 2020	Sep	2020	Sep-2020	can	coke
8424437		51.812948486816/-0.2936109434816	GB	Mon Sep 28 2020	Sep	2020	Sep-2020	plastic
8424436		51.8129359139612/-0.293503236025845	GB	Mon Sep 28 2020	Sep	2020	Sep-2020	can	coke
8424435		51.8129057391098/-0.293511450290953	GB	Mon Sep 28 2020	Sep	2020	Sep-2020	cigarette
8424434		51.8129096366948/-0.293495273217832	GB	Mon Sep 28 2020	Sep	2020	Sep-2020	paper
8424433		51.8129624007752/-0.293530980125343	GB	Mon Sep 28 2020	Sep	2020	Sep-2020	paper
8424432		51.812960431028/-0.293652769178426	GB	Mon Sep 28 2020	Sep	2020	Sep-2020	cigarette
8424431		51.8128457246831/-0.293599795550381	GB	Mon Sep 28 2020	Sep	2020	Sep-2020	plastic
8424430		51.8128952617308/-0.293675735593116	GB	Mon Sep 28 2020	Sep	2020	Sep-2020	foil
8424428		51.8128670147171/-0.293612200767075	GB	Mon Sep 28 2020	Sep	2020	Sep-2020	paper
8424427		51.8128343672043/-0.293581606820499	GB	Mon Sep 28 2020	Sep	2020	Sep-2020	wrapper
8424426		51.8128541065863/-0.293608764186775	GB	Mon Sep 28 2020	Sep	2020	Sep-2020	paper
8424425		51.8128129933512/-0.293552940711652	GB	Mon Sep 28 2020	Sep	2020	Sep-2020	plastic
8424424		51.8127934635168/-0.293623097241198	GB	Mon Sep 28 2020	Sep	2020	Sep-2020	cigarette
8424423		51.8127341196424/-0.293561490252887	GB	Mon Sep 28 2020	Sep	2020	Sep-2020	plastic
8424422		51.812898363035/-0.293452274054562	GB	Mon Sep 28 2020	Sep	2020	Sep-2020	plastic
8424421		51.8128018035105/-0.293535757810151	GB	Mon Sep 28 2020	Sep	2020	Sep-2020	cigarette
8424420		51.8128129933512/-0.293552940711652	GB	Mon Sep 28 2020	Sep	2020	Sep-2020	cardboard
8424419		51.8123599933943/-0.293741784990107	GB	Mon Sep 28 2020	Sep	2020	Sep-2020	cigarette
8424418		51.8128129933512/-0.293552940711652	GB	Mon Sep 28 2020	Sep	2020	Sep-2020	string
8424416		51.8122472987061/-0.293772127479588	GB	Mon Sep 28 2020	Sep	2020	Sep-2020	wrapper
8424413		51.8121612165606/-0.293818898499286	GB	Mon Sep 28 2020	Sep	2020	Sep-2020	paper
8424412		51.8121585343516/-0.293819485232508	GB	Mon Sep 28 2020	Sep	2020	Sep-2020	wetwipe
8424411		51.8119095080083/-0.293929958716309	GB	Mon Sep 28 2020	Sep	2020	Sep-2020	wrapper
8424410		51.8119401857739/-0.29391244053868	GB	Mon Sep 28 2020	Sep	2020	Sep-2020	wetwipe
8424409		51.8120762240624/-0.293902885169065	GB	Mon Sep 28 2020	Sep	2020	Sep-2020	wetwipe
8424408		51.8119401857739/-0.29391244053868	GB	Mon Sep 28 2020	Sep	2020	Sep-2020	tissue
8424407		51.8118573306611/-0.293965833261883	GB	Mon Sep 28 2020	Sep	2020	Sep-2020	paper
8424406		51.8118131580314/-0.29400137253133	GB	Mon Sep 28 2020	Sep	2020	Sep-2020	paper
8424405		51.8117942568397/-0.294028529897606	GB	Mon Sep 28 2020	Sep	2020	Sep-2020	paper
8424404		51.8118182290828/-0.294305803254521	GB	Mon Sep 28 2020	Sep	2020	Sep-2020	paper
8424402		51.811806787785/-0.294044120237505	GB	Mon Sep 28 2020	Sep	2020	Sep-2020	plastic
8424399		51.8117920356354/-0.294067254290259	GB	Mon Sep 28 2020	Sep	2020	Sep-2020	plastic
8424398		51.8118048180377/-0.294074714184081	GB	Mon Sep 28 2020	Sep	2020	Sep-2020	cleaningcloth
8424396		51.8117927061876/-0.294117964804446	GB	Mon Sep 28 2020	Sep	2020	Sep-2020	wrapper
8424395		51.8117915327212/-0.294113941490924	GB	Mon Sep 28 2020	Sep	2020	Sep-2020	cleaningcloth
8424394		51.8117892276978/-0.294124167412793	GB	Mon Sep 28 2020	Sep	2020	Sep-2020	paper
8424393		51.8117880961409/-0.294120311737334	GB	Mon Sep 28 2020	Sep	2020	Sep-2020	wrapper
8424392		51.811785749208/-0.294078486040508	GB	Mon Sep 28 2020	Sep	2020	Sep-2020	plastic
8424391		51.8117983220628/-0.294136740267551	GB	Mon Sep 28 2020	Sep	2020	Sep-2020	wrapper
8424389		51.8117372598982/-0.294721294194734	GB	Mon Sep 28 2020	Sep	2020	Sep-2020	plastic
8424387		51.8117212504631/-0.295199984684861	GB	Mon Sep 28 2020	Sep	2020	Sep-2020	paper
8424386		51.8117590528464/-0.294870324433124	GB	Mon Sep 28 2020	Sep	2020	Sep-2020	plastic
8424385		51.811772505801/-0.294164149090922	GB	Mon Sep 28 2020	Sep	2020	Sep-2020	paper
8424384		51.8117453065252/-0.294394483790076	GB	Mon Sep 28 2020	Sep	2020	Sep-2020	plastic	bottle
8424382		51.8117569992801/-0.294437315315282	GB	Mon Sep 28 2020	Sep	2020	Sep-2020	plastic
8424381		51.8117074527395/-0.295436047112562	GB	Mon Sep 28 2020	Sep	2020	Sep-2020	cigarette
8424380		51.8117629923409/-0.294448211789405	GB	Mon Sep 28 2020	Sep	2020	Sep-2020	paper
8424379		51.81174488743/-0.2944674901667	GB	Mon Sep 28 2020	Sep	2020	Sep-2020	plastic
8424378		51.811781767804/-0.294454414397752	GB	Mon Sep 28 2020	Sep	2020	Sep-2020	plastic
8424376		51.8117259443289/-0.2945969905707	GB	Mon Sep 28 2020	Sep	2020	Sep-2020	sandwichwrapper
8424375		51.8117370084411/-0.29470251873163	GB	Mon Sep 28 2020	Sep	2020	Sep-2020	plastic
8424374		51.811754065614/-0.294725652784384	GB	Mon Sep 28 2020	Sep	2020	Sep-2020	plastic
8424373		51.8117355835175/-0.294629512355006	GB	Mon Sep 28 2020	Sep	2020	Sep-2020	wrapper
8423374		53.461387429127/-2.86271868516197	GB	Mon Sep 28 2020	Sep	2020	Sep-2020	aerosolcan	plastic
8422045		53.4607889618482/-2.86403958497262	GB	Mon Sep 28 2020	Sep	2020	Sep-2020	plastic
8422043		53.4607889618482/-2.86403958497262	GB	Mon Sep 28 2020	Sep	2020	Sep-2020	wrapper
8422042		53.4607280397821/-2.86448676082901	GB	Mon Sep 28 2020	Sep	2020	Sep-2020	plastic
8422041		53.4607653331474/-2.8640195807766	GB	Mon Sep 28 2020	Sep	2020	Sep-2020	plastic
8422040		53.4608712563588/-2.86375030451938	GB	Mon Sep 28 2020	Sep	2020	Sep-2020	cans	coffeecup
8422039		53.4607641910439/-2.86402863546721	GB	Mon Sep 28 2020	Sep	2020	Sep-2020	the	mummy
8420993		51.8130279579996/-0.296714501576964	GB	Mon Sep 28 2020	Sep	2020	Sep-2020	plastic
8418526		53.8034066801726/-1.59213434573676	GB	Mon Sep 28 2020	Sep	2020	Sep-2020	plastic	facemask	ppe
8390857		55.0993687381458/-3.74758049467367	GB	Sun Sep 27 2020	Sep	2020	Sep-2020	wrapper	plastic
8390856		55.0999686448417/-3.74738755636266	GB	Sun Sep 27 2020	Sep	2020	Sep-2020	bottlecap	plastic
8390599		51.3503463717171/-0.740905793753501	GB	Sun Sep 27 2020	Sep	2020	Sep-2020	paper	wrapper
8390598		51.3448606425225/-0.741533356719227	GB	Sun Sep 27 2020	Sep	2020	Sep-2020	can	aluminum	metal	beercan	lager	stellaartois
8390597		51.3477638829978/-0.737758856267424	GB	Sun Sep 27 2020	Sep	2020	Sep-2020	elastic
8390595		51.3446264815781/-0.742495290790291	GB	Sun Sep 27 2020	Sep	2020	Sep-2020	alcohol	bottle	glass	corona extra	beer
8390594		51.3447420370075/-0.741873095707951	GB	Sun Sep 27 2020	Sep	2020	Sep-2020	plastic	wrapper
8390593		51.3454064668777/-0.738956060477151	GB	Sun Sep 27 2020	Sep	2020	Sep-2020	plastic	straw
8390592		51.3477638829978/-0.737758856267424	GB	Sun Sep 27 2020	Sep	2020	Sep-2020	plastic	wrapper
8390591		51.3450920752933/-0.740179399768293	GB	Sun Sep 27 2020	Sep	2020	Sep-2020	bottlecap	metal
8390590		51.3506555914323/-0.740309557163511	GB	Sun Sep 27 2020	Sep	2020	Sep-2020	poopbag	dogpoop
8390589		51.3477638829978/-0.737758856267424	GB	Sun Sep 27 2020	Sep	2020	Sep-2020	aluminum	can	cocacola	metal
8390588		51.345475093004/-0.738871916027852	GB	Sun Sep 27 2020	Sep	2020	Sep-2020	cigarette	plastic	paper	wrapper
8390539		50.83295/-0.1351805	GB	Sun Sep 27 2020	Sep	2020	Sep-2020	bottlecap	plastic
8390476		50.83329667/-0.13685283	GB	Sun Sep 27 2020	Sep	2020	Sep-2020	paper	cup
8390471		50.83328333/-0.13675283	GB	Sun Sep 27 2020	Sep	2020	Sep-2020	can	aluminium
8390454		50.83331333/-0.137075	GB	Sun Sep 27 2020	Sep	2020	Sep-2020	can	aluminium
8390453		50.83332/-0.13714167	GB	Sun Sep 27 2020	Sep	2020	Sep-2020	toothbrush	plastic
8390452		50.83347167/-0.13783333	GB	Sun Sep 27 2020	Sep	2020	Sep-2020	plastic	bottle
8390450		50.833545/-0.1385	GB	Sun Sep 27 2020	Sep	2020	Sep-2020	plastic	drink	bottle
8390449		50.83341667/-0.1374805	GB	Sun Sep 27 2020	Sep	2020	Sep-2020	can	aluminium
8390448		50.83337833/-0.13736667	GB	Sun Sep 27 2020	Sep	2020	Sep-2020	can	aluminium
8390447		50.83334667/-0.13733333	GB	Sun Sep 27 2020	Sep	2020	Sep-2020	paper
8390446		50.833325/-0.13722217	GB	Sun Sep 27 2020	Sep	2020	Sep-2020	paper
8390444		50.83294167/-0.13514167	GB	Sun Sep 27 2020	Sep	2020	Sep-2020	plastic	drink	energy drink
8389086		52.1888123715797/-0.883565881987411	GB	Sun Sep 27 2020	Sep	2020	Sep-2020	bag	plastic
8389085		52.1885437645076/-0.883998792570307	GB	Sun Sep 27 2020	Sep	2020	Sep-2020	plastic
8389084		52.1887763394966/-0.883555679586501	GB	Sun Sep 27 2020	Sep	2020	Sep-2020	plastic
8389083		52.1875924860314/-0.883463630018963	GB	Sun Sep 27 2020	Sep	2020	Sep-2020	plastic	wrapper
8389082		52.1883103567778/-0.883537159620698	GB	Sun Sep 27 2020	Sep	2020	Sep-2020	plastic	wrapper
8389081		52.1875068977291/-0.883381352463561	GB	Sun Sep 27 2020	Sep	2020	Sep-2020	plastic	piece
8389080		52.1884310904812/-0.883547617842919	GB	Sun Sep 27 2020	Sep	2020	Sep-2020	plastic
8389079		52.1884310904812/-0.883547617842919	GB	Sun Sep 27 2020	Sep	2020	Sep-2020	plastic
8389078		52.1885003317065/-0.88350640929326	GB	Sun Sep 27 2020	Sep	2020	Sep-2020	plastic	wrapper
8389077		52.1886025703326/-0.883457879445495	GB	Sun Sep 27 2020	Sep	2020	Sep-2020	plastic	bag
8389076		52.1885456855625/-0.88353459676507	GB	Sun Sep 27 2020	Sep	2020	Sep-2020	paper	wrapper
8389075		52.1884797514332/-0.883986937739706	GB	Sun Sep 27 2020	Sep	2020	Sep-2020	paper
8389074		52.1888369119931/-0.883480153428343	GB	Sun Sep 27 2020	Sep	2020	Sep-2020	plastic	bag
8389073		52.1884971633244/-0.884012352146464	GB	Sun Sep 27 2020	Sep	2020	Sep-2020	wrapper
8389072		52.1881211245603/-0.883840378329443	GB	Sun Sep 27 2020	Sep	2020	Sep-2020	paper
8382578		52.1048221558689/-2.33895300894327	GB	Sun Sep 27 2020	Sep	2020	Sep-2020	bottlecap	metal
8379371		50.57473833/-2.46683667	GB	Sun Sep 27 2020	Sep	2020	Sep-2020	styrofoam
8379370		50.57479167/-2.46693667	GB	Sun Sep 27 2020	Sep	2020	Sep-2020	crisppacket
8379367		50.57362833/-2.46681667	GB	Sun Sep 27 2020	Sep	2020	Sep-2020	plastic
8379365		50.57383333/-2.46698833	GB	Sun Sep 27 2020	Sep	2020	Sep-2020	nylon rope
8379364		50.57449667/-2.46690333	GB	Sun Sep 27 2020	Sep	2020	Sep-2020	fishingline
8379363		50.57387167/-2.46700333	GB	Sun Sep 27 2020	Sep	2020	Sep-2020	plastic bottle
8379362		50.57370333/-2.46683333	GB	Sun Sep 27 2020	Sep	2020	Sep-2020	nylon rope
8379356		50.57363667/-2.46683	GB	Sun Sep 27 2020	Sep	2020	Sep-2020	plastic
8379355		50.57346333/-2.46651333	GB	Sun Sep 27 2020	Sep	2020	Sep-2020	nylon rope
8379351		50.57366167/-2.46674167	GB	Sun Sep 27 2020	Sep	2020	Sep-2020	nylon rope
8379350		50.57363667/-2.46672167	GB	Sun Sep 27 2020	Sep	2020	Sep-2020	plastic
8379348		50.57358/-2.46667167	GB	Sun Sep 27 2020	Sep	2020	Sep-2020	nylon rope
8379344		50.57363833/-2.466695	GB	Sun Sep 27 2020	Sep	2020	Sep-2020	nylonrope
8379342		50.57362833/-2.46672167	GB	Sun Sep 27 2020	Sep	2020	Sep-2020	nylonrope
8379341		50.57347167/-2.46652167	GB	Sun Sep 27 2020	Sep	2020	Sep-2020	fishingline
8379339		50.57347167/-2.46652	GB	Sun Sep 27 2020	Sep	2020	Sep-2020	fishingline
8379328		50.573475/-2.46652167	GB	Sun Sep 27 2020	Sep	2020	Sep-2020	fishingline
8379325		50.57335333/-2.46636667	GB	Sun Sep 27 2020	Sep	2020	Sep-2020	nylon rope
8379324		50.57335333/-2.46637167	GB	Sun Sep 27 2020	Sep	2020	Sep-2020	metal
8379320		50.573355/-2.466375	GB	Sun Sep 27 2020	Sep	2020	Sep-2020	fishingline
8379317		50.57364667/-2.466275	GB	Sun Sep 27 2020	Sep	2020	Sep-2020	nylon rope
8379316		50.57577833/-2.46724167	GB	Sun Sep 27 2020	Sep	2020	Sep-2020	dogpoobag
8379313		50.575795/-2.467305	GB	Sun Sep 27 2020	Sep	2020	Sep-2020	plastic
8379312		50.57438667/-2.46622167	GB	Sun Sep 27 2020	Sep	2020	Sep-2020	plastic
8379311		50.57371167/-2.46635333	GB	Sun Sep 27 2020	Sep	2020	Sep-2020	fishingline
8379309		50.57335333/-2.466375	GB	Sun Sep 27 2020	Sep	2020	Sep-2020	nylon rope
8379308		50.57364667/-2.46627833	GB	Sun Sep 27 2020	Sep	2020	Sep-2020	nylon rope
8379305		50.573995/-2.4662	GB	Sun Sep 27 2020	Sep	2020	Sep-2020	plastic
8379304		50.57371167/-2.46637	GB	Sun Sep 27 2020	Sep	2020	Sep-2020	plastic
8379303		50.57380333/-2.466275	GB	Sun Sep 27 2020	Sep	2020	Sep-2020	plastic
8379302		50.57371167/-2.46637	GB	Sun Sep 27 2020	Sep	2020	Sep-2020	fishingline
8379301		50.57426167/-2.46617833	GB	Sun Sep 27 2020	Sep	2020	Sep-2020	plasticbottle
8379299		50.57438667/-2.46622167	GB	Sun Sep 27 2020	Sep	2020	Sep-2020	plastic
8379298		50.57415833/-2.46615	GB	Sun Sep 27 2020	Sep	2020	Sep-2020	plastic
8379297		50.57579167/-2.46731167	GB	Sun Sep 27 2020	Sep	2020	Sep-2020	plastic
8379296		50.57480333/-2.46683667	GB	Sun Sep 27 2020	Sep	2020	Sep-2020	plastic
8379295		50.57445333/-2.46622833	GB	Sun Sep 27 2020	Sep	2020	Sep-2020	wrapper
8372933		54.5813317527883/-2.93505747511202	GB	Sat Sep 26 2020	Sep	2020	Sep-2020	tissue
8372931		54.5814084169032/-2.9351939633516	GB	Sat Sep 26 2020	Sep	2020	Sep-2020	paper
8372930		54.581429120204/-2.93516001664375	GB	Sat Sep 26 2020	Sep	2020	Sep-2020	tissue
8372929		54.5814662939446/-2.93499263003742	GB	Sat Sep 26 2020	Sep	2020	Sep-2020	energygel
8372928		54.5814828482034/-2.93496555649017	GB	Sat Sep 26 2020	Sep	2020	Sep-2020	tissue
8372927		54.5813802537085/-2.93500252068316	GB	Sat Sep 26 2020	Sep	2020	Sep-2020	tissue
8372926		54.581414493783/-2.93493789620971	GB	Sat Sep 26 2020	Sep	2020	Sep-2020	plastic
8372925		54.5814371668311/-2.93497293256497	GB	Sat Sep 26 2020	Sep	2020	Sep-2020	cigarette
8372924		54.5814675931396/-2.93503940105712	GB	Sat Sep 26 2020	Sep	2020	Sep-2020	paper
8372923		54.5815597940745/-2.93496631086146	GB	Sat Sep 26 2020	Sep	2020	Sep-2020	paper
8372922		54.5815809164705/-2.93501023203408	GB	Sat Sep 26 2020	Sep	2020	Sep-2020	cigarette
8372921		54.5814117277549/-2.93493554927682	GB	Sat Sep 26 2020	Sep	2020	Sep-2020	cigarette
8372920		55.8211121801807/-4.29263329133791	GB	Thu Sep 24 2020	Sep	2020	Sep-2020	kfc cup
8372919		54.5814189781012/-2.93489380739903	GB	Sat Sep 26 2020	Sep	2020	Sep-2020	cigarettepack
8372918		54.5814864943312/-2.93502498418366	GB	Sat Sep 26 2020	Sep	2020	Sep-2020	tissue
8372917		54.5814189781012/-2.93489380739903	GB	Sat Sep 26 2020	Sep	2020	Sep-2020	cigarettepack
8372915		54.5814248454334/-2.9349040333209	GB	Sat Sep 26 2020	Sep	2020	Sep-2020	tissue
8372914		54.5812705765055/-2.93490847572958	GB	Sat Sep 26 2020	Sep	2020	Sep-2020	tissue
8372913		55.8211123059092/-4.29255500436229	GB	Thu Sep 24 2020	Sep	2020	Sep-2020	can
8372912		55.8211121801807/-4.29263329133791	GB	Thu Sep 24 2020	Sep	2020	Sep-2020	wrapper
8372911		55.8211072767673/-4.29263320751888	GB	Thu Sep 24 2020	Sep	2020	Sep-2020	wrapper
8372910		55.8210981404929/-4.29262482561571	GB	Thu Sep 24 2020	Sep	2020	Sep-2020	face mask
8372909		55.8211008227019/-4.29263899103207	GB	Thu Sep 24 2020	Sep	2020	Sep-2020	dogpoobag
8372908		55.8211019961683/-4.2926353868137	GB	Thu Sep 24 2020	Sep	2020	Sep-2020	crisppacket
8372907		55.8211237472071/-4.2926182039122	GB	Thu Sep 24 2020	Sep	2020	Sep-2020	wrapper
8372906		55.8211326739339/-4.29254528135461	GB	Thu Sep 24 2020	Sep	2020	Sep-2020	plastic
8372905		55.821110419981/-4.29257520474893	GB	Thu Sep 24 2020	Sep	2020	Sep-2020	tissue
8372904		55.8211416006608/-4.29249088280303	GB	Thu Sep 24 2020	Sep	2020	Sep-2020	plastic	cocainewrapper
8372903		55.8211406367419/-4.29247822612924	GB	Thu Sep 24 2020	Sep	2020	Sep-2020	plastic
8372902		55.8211414330227/-4.29249649867815	GB	Thu Sep 24 2020	Sep	2020	Sep-2020	wrapper
8372900		55.8211406367419/-4.29247822612924	GB	Thu Sep 24 2020	Sep	2020	Sep-2020	plastic
8372899		55.8211406367419/-4.29247822612924	GB	Thu Sep 24 2020	Sep	2020	Sep-2020	wrapper
8372898		55.821134056948/-4.29248090833825	GB	Thu Sep 24 2020	Sep	2020	Sep-2020	energydrink	can
8372897		55.821153963968/-4.29247043095929	GB	Thu Sep 24 2020	Sep	2020	Sep-2020	drinkcarton
8372896		55.8211416844798/-4.29247529246313	GB	Thu Sep 24 2020	Sep	2020	Sep-2020	paper
8372895		55.8211426064892/-4.29246288724643	GB	Thu Sep 24 2020	Sep	2020	Sep-2020	haribo	wrapper
8372894		55.8211390022708/-4.29247730411989	GB	Thu Sep 24 2020	Sep	2020	Sep-2020	piece
8372893		55.8211463364361/-4.29246204905612	GB	Thu Sep 24 2020	Sep	2020	Sep-2020	hulahoops	wrapper
8372892		55.8211904252468/-4.2924006935249	GB	Thu Sep 24 2020	Sep	2020	Sep-2020	facemask
8372891		55.8211416844798/-4.29244897328717	GB	Thu Sep 24 2020	Sep	2020	Sep-2020	wrapper
8372890		55.8211405110134/-4.29245634936196	GB	Thu Sep 24 2020	Sep	2020	Sep-2020	cigarette	butt
8372889		55.8211904252468/-4.2924006935249	GB	Thu Sep 24 2020	Sep	2020	Sep-2020	wrapper
8372888		55.8211486414595/-4.29244880564911	GB	Thu Sep 24 2020	Sep	2020	Sep-2020	piece
8372887		55.8211738290785/-4.2923541739623	GB	Thu Sep 24 2020	Sep	2020	Sep-2020	wrapper
8372886		55.821193694189/-4.29241360165579	GB	Thu Sep 24 2020	Sep	2020	Sep-2020	plastic
8372885		55.8212259226067/-4.29242399521572	GB	Thu Sep 24 2020	Sep	2020	Sep-2020	plastic
8372884		55.8212032495586/-4.2923539225052	GB	Thu Sep 24 2020	Sep	2020	Sep-2020	paper
8372883		55.8212133078424/-4.29242860526246	GB	Thu Sep 24 2020	Sep	2020	Sep-2020	plastic
8372881		55.8211937360985/-4.29242634214861	GB	Thu Sep 24 2020	Sep	2020	Sep-2020	plastic
8372880		55.8212133078424/-4.29242860526246	GB	Thu Sep 24 2020	Sep	2020	Sep-2020	wrapper
8372879		55.8212060574962/-4.29239491001171	GB	Thu Sep 24 2020	Sep	2020	Sep-2020	plastic
8372878		55.8212136850281/-4.2924075666855	GB	Thu Sep 24 2020	Sep	2020	Sep-2020	wrapper
8372877		55.8212010283543/-4.29234579205913	GB	Thu Sep 24 2020	Sep	2020	Sep-2020	wrapper
8372876		55.8212048840298/-4.29239172488851	GB	Thu Sep 24 2020	Sep	2020	Sep-2020	wrapper
8372875		55.8211943647413/-4.29238862358433	GB	Thu Sep 24 2020	Sep	2020	Sep-2020	wrapper
8372874		55.8211943228318/-4.29236884229285	GB	Thu Sep 24 2020	Sep	2020	Sep-2020	cigarettepack
8372873		55.8212033333777/-4.29235165939135	GB	Thu Sep 24 2020	Sep	2020	Sep-2020	paper
8372872		55.8211877849473/-4.29237621836764	GB	Thu Sep 24 2020	Sep	2020	Sep-2020	wrapper
8372871		55.8211952448411/-4.29232249036831	GB	Thu Sep 24 2020	Sep	2020	Sep-2020	wrapper
8372870		55.821217414975/-4.29232198745412	GB	Thu Sep 24 2020	Sep	2020	Sep-2020	wrapper
8372869		55.8212037524728/-4.29229633883042	GB	Thu Sep 24 2020	Sep	2020	Sep-2020	wrapper
8372868		55.8169852663351/-4.27249778062503	GB	Thu Sep 24 2020	Sep	2020	Sep-2020	plastic
8372867		55.8211723622454/-4.29232399911088	GB	Thu Sep 24 2020	Sep	2020	Sep-2020	wrapper
8372866		55.8212274732588/-4.29233682342273	GB	Thu Sep 24 2020	Sep	2020	Sep-2020	plastic	bottle
8372864		55.8212030819206/-4.29230145179135	GB	Thu Sep 24 2020	Sep	2020	Sep-2020	can
8372863		55.816957061231/-4.27253591828446	GB	Thu Sep 24 2020	Sep	2020	Sep-2020	plastic
8372862		55.8169312868787/-4.27254798822503	GB	Thu Sep 24 2020	Sep	2020	Sep-2020	wetwipe
8372861		55.8169404231532/-4.27237473428647	GB	Thu Sep 24 2020	Sep	2020	Sep-2020	silver paper
8372860		55.8169532055555/-4.27254999988179	GB	Thu Sep 24 2020	Sep	2020	Sep-2020	wrapper
8372859		55.8169347653685/-4.27253826521735	GB	Thu Sep 24 2020	Sep	2020	Sep-2020	wrapper
8372858		55.8169347653685/-4.27253826521735	GB	Thu Sep 24 2020	Sep	2020	Sep-2020	wrapper
8372857		55.8169535827411/-4.27237649448614	GB	Thu Sep 24 2020	Sep	2020	Sep-2020	plastic
8372856		55.8169455361141/-4.2723610717843	GB	Thu Sep 24 2020	Sep	2020	Sep-2020	cigarette
8372855		55.8169357292874/-4.27238336764674	GB	Thu Sep 24 2020	Sep	2020	Sep-2020	cigarette
8372854		55.8169501880704/-4.27240532823305	GB	Thu Sep 24 2020	Sep	2020	Sep-2020	plastic
8372853		55.8169922233148/-4.27242469042938	GB	Thu Sep 24 2020	Sep	2020	Sep-2020	cigarette
8372852		55.8168668781303/-4.27286089509856	GB	Thu Sep 24 2020	Sep	2020	Sep-2020	wrapper
8372851		55.816983464226/-4.27246081643204	GB	Thu Sep 24 2020	Sep	2020	Sep-2020	plastic
8372850		55.8169151517151/-4.27241513505976	GB	Thu Sep 24 2020	Sep	2020	Sep-2020	wetwipe
8372849		55.8169204323141/-4.27232729271452	GB	Thu Sep 24 2020	Sep	2020	Sep-2020	cigarette
8372848		55.8169949055238/-4.27267597988646	GB	Thu Sep 24 2020	Sep	2020	Sep-2020	paper
8372847		55.8169985516517/-4.27273591049413	GB	Thu Sep 24 2020	Sep	2020	Sep-2020	glass
8372846		55.817003287427/-4.27268863656025	GB	Thu Sep 24 2020	Sep	2020	Sep-2020	glass
8372845		55.8169864817111/-4.27273943089347	GB	Thu Sep 24 2020	Sep	2020	Sep-2020	glass
8372844		55.8169818716644/-4.2727030534337	GB	Thu Sep 24 2020	Sep	2020	Sep-2020	plastic
8372843		55.8170195064096/-4.2726874630938	GB	Thu Sep 24 2020	Sep	2020	Sep-2020	glass
8372842		55.8169281078085/-4.27254923826137	GB	Thu Sep 24 2020	Sep	2020	Sep-2020	plastic
8372841		55.8170157345532/-4.27270984277527	GB	Thu Sep 24 2020	Sep	2020	Sep-2020	cigarette
8372840		55.8170058858169/-4.27273482084672	GB	Thu Sep 24 2020	Sep	2020	Sep-2020	cigarette
8372839		55.8169405488817/-4.27248093299966	GB	Thu Sep 24 2020	Sep	2020	Sep-2020	piece
8372837		55.8170846337972/-4.27263448946576	GB	Thu Sep 24 2020	Sep	2020	Sep-2020	wrapper
8372836		55.8170608291922/-4.27258671261768	GB	Thu Sep 24 2020	Sep	2020	Sep-2020	glass
8372834		55.8170555905027/-4.27258335985641	GB	Thu Sep 24 2020	Sep	2020	Sep-2020	glass
8372833		55.817023194447/-4.27265678532819	GB	Thu Sep 24 2020	Sep	2020	Sep-2020	glass
8372832		55.8170107054113/-4.27265636623304	GB	Thu Sep 24 2020	Sep	2020	Sep-2020	glass
8372830		55.8170881961061/-4.27256877534489	GB	Thu Sep 24 2020	Sep	2020	Sep-2020	piece
8372829		55.8170657745151/-4.27266416140299	GB	Thu Sep 24 2020	Sep	2020	Sep-2020	piece
8372000		54.6637392776063/-5.66745856636162	GB	Sun Sep 27 2020	Sep	2020	Sep-2020	plastic	bottle	drink	water	strathmore	agbarr
8371997		54.6672305900101/-5.66273941770703	GB	Sun Sep 27 2020	Sep	2020	Sep-2020	plastic	bottlecap	drink
8371996		54.66769009368/-5.66210324876538	GB	Sun Sep 27 2020	Sep	2020	Sep-2020	can	drink	energydrink	metal	boostenergy	boostdrinks
8371995		54.665239549909/-5.67548258842258	GB	Sun Sep 27 2020	Sep	2020	Sep-2020	plastic	sweet	wrapper	chomp	cadburys	mondelezinternational
8371994		54.6633323663828/-5.66215072344758	GB	Sun Sep 27 2020	Sep	2020	Sep-2020	plastic	carrierbag	food
8371990		54.6681455243888/-5.6612922158145	GB	Sun Sep 27 2020	Sep	2020	Sep-2020	plastic	sweet	wrapper	piece	dairymilk	cadburys	mondelezinternational
8371985		54.6680249088022/-5.66126212478211	GB	Sun Sep 27 2020	Sep	2020	Sep-2020	plastic	tub
8371983		54.6680106176573/-5.66132591106525	GB	Sun Sep 27 2020	Sep	2020	Sep-2020	plastic	sweet	wrapper	piece	topic	marsincorporated
8371982		54.6680446900936/-5.66123337485423	GB	Sun Sep 27 2020	Sep	2020	Sep-2020	plastic	packet	piece	snack	skips	kpsnacks	intersnack
8371981		54.6680083545434/-5.66136513837209	GB	Sun Sep 27 2020	Sep	2020	Sep-2020	cocacola	drink	ccrf	bottlecap	plastic	cocacolacompany
8371979		54.6681149723517/-5.66137586720815	GB	Sun Sep 27 2020	Sep	2020	Sep-2020	plastic	packet	snack	discos	kpsnacks	intersnack
8371978		54.6680840012195/-5.66137787886491	GB	Sun Sep 27 2020	Sep	2020	Sep-2020	plastic	packet	snack	smithssnackfoodcompany	pepsico
8371977		54.6681107814002/-5.66135625355473	GB	Sun Sep 27 2020	Sep	2020	Sep-2020	plastic	straw	drink
8371976		54.6680976218122/-5.66132515669396	GB	Sun Sep 27 2020	Sep	2020	Sep-2020	plastic	bottle	drink
8371973		54.6680639684709/-5.66129288636675	GB	Sun Sep 27 2020	Sep	2020	Sep-2020	plastic	balloon
8371971		54.6680990048262/-5.66132423468461	GB	Sun Sep 27 2020	Sep	2020	Sep-2020	plastic	tray	food
8371968		54.6680708416315/-5.66152330488494	GB	Sun Sep 27 2020	Sep	2020	Sep-2020	plastic	piece	balloon
8371967		54.6681166906419/-5.66130545922151	GB	Sun Sep 27 2020	Sep	2020	Sep-2020	plastic	food	tray
8371966		54.66815667232/-5.66121250391534	GB	Sun Sep 27 2020	Sep	2020	Sep-2020	plastic	packet	snack	tayto	taytogrouplimited	piece
8371962		54.6681424230846/-5.66136899404755	GB	Sun Sep 27 2020	Sep	2020	Sep-2020	plastic	sweet	wrapper	lionbar	nestle	piece
8371961		54.6681073448199/-5.66139858216575	GB	Sun Sep 27 2020	Sep	2020	Sep-2020	plastic	packet	snack	monstermunch	walkers	fritolay	pepsico
8371960		54.6681159362706/-5.66135642119279	GB	Sun Sep 27 2020	Sep	2020	Sep-2020	plastic	packet	snack	butterkist	kpsnacks	intersnack	piece
8371957		54.6681445604699/-5.66141853109529	GB	Sun Sep 27 2020	Sep	2020	Sep-2020	plastic	packet	snack	frisps	kpsnacks	intersnack
8371954		54.6681046626108/-5.66150494851699	GB	Sun Sep 27 2020	Sep	2020	Sep-2020	plastic	wrapper	sweet	kinder	ferrero
8371953		54.6680992981928/-5.66127000377109	GB	Sun Sep 27 2020	Sep	2020	Sep-2020	plastic	sweet	wrapper	milkyway	piece	marsincorporated
[truncated: 59,107 more rows]
[truncated: 1 more columns]
